# Supplementary material for: Mining for genes related to pistil abortion in Prunus sibirica L
Source: PeerJ. 2022 Nov 15;10:e14366. doi: 10.7717/peerj.14366 (PMC9673769; doi:10.7717/peerj.14366)
Supplement: Table S1 [file peerj-10-14366-s001.xlsx]

## Sheet: Sheet1
Table S1 The power analysis calculation
#ID	APt1	APt2	APt3	NPt1	NPt2	NPt3	NPt1_NPt2_NPt3_vs_APt1_APt2_APt3
PaF106G0100000745.01	5.98584	6.28749	6.32087	6.06933	8.30808	5.75297	0.103288
PaF106G0600022883.01	9.12601	9.28627	7.85623	9.46591	7.74864	9.21905	0.0508806
PaF106G0200007909.01	0	0.02092	0.105701	0.282773	0	0.036263	0.110895
PaF106G0100003997.01	0.097373	0.295958	0.368273	0.630719	0.490966	0.319141	0.33264
PaF106G0100005648.01	0	0	0	0	0	0
PaF106G0800030940.01	10.1832	9.51359	6.42567	6.27617	6.78404	8.99351	0.160423
PaF106G0700029114.01	21.3711	19.8617	21.4657	32.8343	28.385	29.4564	0.570196
PaF106G0300014157.01	106.922	118.474	131.561	72.9945	91.3111	90.9115	0.499607
PaF106G0400017733.01	0.799481	0.769533	1.19926	1.9635	1.34993	1.82859	0.487615
PaF106G0200007856.01	0.06636	0.216288	0.36848	0.120879	0.736462	0.084348	0.0748966
PaF106G0500020777.01	0.319486	0.420327	0.290573	0.477226	0.422956	0.235629	0.0748624
Prunus_sibirica_newGene_1045	0.366512	0.38869	0	0	0	0.287203	0.167253
Prunus_sibirica_newGene_1043	0.579236	0.631285	0.729928	0.635425	0.421566	0.300203	0.322974
Prunus_sibirica_newGene_1040	0.841842	1.47154	1.23427	1.87337	2.65774	1.89515	0.462774
Prunus_sibirica_newGene_1041	1.42196	1.11736	1.53323	1.09425	1.3102	1.33949	0.122745
PaF106G0100003647.01	11.849	10.9602	11.8956	9.61296	9.86308	10.6442	0.493451
Prunus_sibirica_newGene_1048	1.05787	0.886119	0.594663	1.55306	1.69551	1.53812	0.550508
Prunus_sibirica_newGene_1049	0	0	0	0.529959	0.19608	0.331257	0.499689
PaF106G0600022945.01	0.295416	0.257909	0.427011	0.448829	0.245662	0.308503	0.051308
PaF106G0300013897.01	0.083144	0.047805	0.069033	0.517784	0.133654	0.525359	0.416463
PaF106G0600022881.01	0	0.122015	0	0	0	0	0.170075
PaF106G0100003995.01	44.5978	45.0519	42.8037	22.0722	27.7677	26.4624	0.592314
PaF106G0800030076.01	0	0	0	0	0	0
PaF106G0100002349.01	27.6702	26.1181	27.7114	0	0.235734	0.062637	0.608124
PaF106G0300013568.01	0.426173	0.278871	0.845638	0	0.136316	0.44972	0.266843
PaF106G0600022186.01	0	0	0	0	0	0
PaF106G0600023243.01	0	0	0	0	0	0
PaF106G0600023791.01	2.7376	3.05086	3.20885	0.801217	1.28119	1.42043	0.582006
PaF106G0700028378.01	0.121733	0.147304	0	0	0	0	0.348686
PaF106G0100003936.01	0	0	0	0	0	0
PaF106G0200009501.01	4.30476	5.43263	5.17414	5.95832	8.77871	6.49542	0.388637
PaF106G0500021040.01	0	0.332436	0.246739	2.37085	1.29448	1.55618	0.53512
PaF106G0700028514.01	0.480431	0.237523	0	5.50263	5.83916	3.27439	0.559208
PaF106G0200007749.01	0.47083	1.21115	1.12638	0.817198	0.809723	0.67332	0.116158
PaF106G0600024217.01	63.5337	68.704	63.9489	73.5653	68.9826	69.0593	0.391281
PaF106G0300014079.01	2.66513	1.98713	1.26684	2.27003	1.94179	1.33039	0.0593611
PaF106G0100002988.01	3.71693	3.21597	4.18569	5.69294	5.59207	5.29788	0.563989
PaF106G0200010661.01	23.4391	24.0964	28.4294	34.3752	34.9935	35.7045	0.564388
PaF106G0400016778.01	11.3368	13.1636	13.8416	10.3254	10.3906	10.9802	0.448777
PaF106G0700028443.01	17.5912	12.9878	19.4318	19.2818	25.3222	22.1443	0.373992
PaF106G0300014159.01	101.695	91.8947	92.4284	117.29	108.849	105.454	0.4748
PaF106G0600021829.01	53.1899	56.077	56.3731	40.9456	44.3428	52.3704	0.429384
PaF106G0600023691.01	0.031467	0	0	0	0	0	0.170075
PaF106G0600022853.01	8.49567	10.7244	9.9679	16.9415	16.4561	17.4627	0.592302
PaF106G0400016556.01	0	0	0	0	0	0
PaF106G0800030165.01	33.6707	36.5367	37.8593	36.1743	34.7127	33.7121	0.133684
PaF106G0300013044.01	0.186675	0.293491	0	0	0	0	0.332233
PaF106G0100000090.01	3.85968	4.46701	3.68714	5.57329	4.88279	3.88473	0.254469
PaF106G0300011588.01	5.60149	6.3686	5.15507	3.484	2.93011	2.62962	0.5669
PaF106G0400016558.01	0	0	0.011943	0.964673	1.23224	0.959965	0.596324
PaF106G0100002967.01	0.382709	0.314354	0.327324	0.397384	0.283466	0.401617	0.076825
PaF106G0400014900.01	93.7878	104.032	118.035	90.0165	86.3566	95.1078	0.349607
PaF106G0800030329.01	0	0.041907	0.079735	0.039492	0	0.091321	0.051087
PaF106G0100003829.01	20.852	19.9294	21.2103	22.9527	20.699	20.0366	0.0966954
PaF106G0600025026.01	33.8545	33.3927	36.6417	32.2202	35.3691	32.325	0.153518
PaF106G0600024859.01	0	0	0	0	0	0
PaF106G0600024134.01	0.722521	0.593713	0.623705	1.06349	1.0298	0.871426	0.542014
PaF106G0700027326.01	24.6759	26.1716	24.0827	23.9271	22.585	19.2676	0.353995
PaF106G0100002874.01	0.940473	1.73796	1.24087	2.30777	2.14352	1.91812	0.471892
PaF106G0500021306.01	0.399838	0.780685	0.357621	0.150224	0.890458	0.126777	0.0761589
PaF106G0200007140.01	0	0	0	0	0	0
PaF106G0700028058.01	13.4074	14.962	12.3673	8.28091	6.00014	6.79589	0.570402
PaF106G0600023875.01	0	0	0	0	0	0
PaF106G0800030072.01	0	0	0	0	0	0
PaF106G0800030487.01	13.0987	14.1232	15.4147	10.4852	9.24935	11.0289	0.537385
PaF106G0200007261.01	7.52979	8.49506	7.65998	10.4124	7.71624	7.29943	0.0938587
PaF106G0300011846.01	20.1513	15.66	19.381	16.2312	16.1634	17.09	0.238154
PaF106G0400014997.01	39.2397	40.9428	40.6459	38.484	38.0043	36.1616	0.467273
PaF106G0600023725.01	0	0	0	0	0	0
PaF106G0400015941.01	0	0	0	0	0	0
PaF106G0600025225.01	0	0	0	0	0	0
Prunus_sibirica_newGene_1046	0	0.338153	0.176423	0.041872	0	0	0.286609
PaF106G0600024211.01	1.41646	2.82094	2.27276	2.0543	2.14719	2.36484	0.0502859
PaF106G0500020657.01	9.33054	8.08666	9.39064	12.294	10.9782	11.514	0.537644
PaF106G0300011432.01	6.17444	5.92696	6.09419	7.64767	9.82411	7.27496	0.438549
PaF106G0500020351.01	0	0	0	0.01661	0	0	0.170075
Prunus_sibirica_newGene_361	0	0	0	1.07546	0.251568	0.487	0.411988
Prunus_sibirica_newGene_363	8.34176	7.74668	8.85127	9.71586	9.01453	9.99013	0.454248
PaF106G0700027944.01	0.187585	0	0.160587	0.099513	0.105642	0.08902	0.0632327
Prunus_sibirica_newGene_367	5.44531	5.18895	4.88381	4.59913	5.5396	5.0503	0.0668701
Prunus_sibirica_newGene_369	0.411151	0.111986	0.360356	0.812902	1.39178	0.661969	0.43935
Prunus_sibirica_newGene_368	2.66826	2.92482	3.26928	2.92486	3.65292	4.17653	0.281025
PaF106G0500020357.01	0	0	0	0	0	0
PaF106G0700027827.01	5.38404	6.17215	7.14659	9.67092	7.24019	8.28665	0.414463
PaF106G0800031560.01	59.0148	59.2052	60.0119	57.7769	49.1896	52.3493	0.415001
PaF106G0200006815.01	2.49375	2.4907	4.82259	0.94624	0.343409	1.5165	0.440185
PaF106G0700026312.01	45.3502	47.4008	43.3115	33.2033	38.2443	35.3166	0.550544
PaF106G0100001917.01	0	0	0.011065	0	0	0	0.170075
PaF106G0500020557.01	39.1281	42.6954	44.8762	54.9944	56.3334	54.4511	0.578558
PaF106G0300011005.01	7.87553	8.58551	11.6499	18.3839	20.0585	19.6042	0.582362
PaF106G0100002220.01	0	0	0	0	0	0
PaF106G0300013248.01	0	0	0	0	0	0
PaF106G0700027496.01	26.2405	28.4924	27.7826	37.3789	34.8482	37.9494	0.582521
PaF106G0700027999.01	1.22401	1.94129	1.20348	1.04026	1.76323	0.889213	0.101728
PaF106G0600024499.01	0	0	0	0	0	0
PaF106G0700028166.01	0.646899	0	0	0	0	0	0.170075
PaF106G0300012899.01	0.216155	0	0	0.063588	0.151493	0.348197	0.178908
PaF106G0400016141.01	0	0	0	0	0	0
PaF106G0400017116.01	8.76964	7.93338	8.11253	11.4398	13.9733	11.6155	0.540434
PaF106G0500020958.01	3.31889	4.34379	5.14186	3.86285	4.41987	3.79736	0.0755137
PaF106G0700028164.01	0	0	0	0.114165	0.044791	0.121789	0.508449
PaF106G0700028210.01	0	0	0	0	0	0
PaF106G0700027946.01	58.7093	58.434	58.8303	44.3161	58.1286	47.7177	0.362633
PaF106G0400017796.01	0.285064	0.061543	0.962589	1.02615	0.790552	0.495783	0.184827
PaF106G0100004168.01	12.4684	17.2169	19.7415	10.5347	11.3965	9.71854	0.436233
PaF106G0600022073.01	2.85395	2.95496	3.02603	4.32126	4.9482	4.81952	0.587574
PaF106G0400015947.01	11.9468	8.78471	13.1332	9.9463	9.26504	8.78796	0.260802
PaF106G0600025223.01	0	0	0	0	0	0
PaF106G0800032314.01	0	0	0	0	0	0
PaF106G0700027210.01	14.2569	19.1087	20.0912	0.081636	0.112391	0.017739	0.591476
PaF106G0700027494.01	8.23784	12.171	11.0173	3.03201	3.97422	3.20285	0.562403
PaF106G0200008044.01	0	0.067136	0	0	0	0	0.170075
PaF106G0300012459.01	127.43	129.416	134.6	108.847	90.8523	111.248	0.514262
PaF106G0200007050.01	2.28638	2.19138	2.37049	1.33892	1.40601	1.44207	0.601031
PaF106G0200009675.01	0.337404	0.178468	0.070779	0.036817	0	0.066864	0.355081
PaF106G0300011135.01	0.700624	1.27383	1.02339	1.25045	1.04933	0.298844	0.0721722
PaF106G0600023503.01	25.3611	20.2661	26.8206	27.5035	24.5081	22.7306	0.0639963
PaF106G0400018087.01	9.85635	9.08948	8.32928	8.84774	9.50149	9.33037	0.0610464
PaF106G0700026128.01	20.0138	20.1499	16.9378	20.9367	17.9458	16.7852	0.0622644
Prunus_sibirica_newGene_949	0.294428	0.375272	0.950861	0.361588	0	0	0.313945
Prunus_sibirica_newGene_948	3.63159	3.51546	3.82976	3.44026	4.3811	3.38541	0.0573928
PaF106G0400014630.01	0.183399	0.296513	0.344987	0.948201	0.628588	0.324484	0.34147
Prunus_sibirica_newGene_944	0.096346	0.198906	0.137654	0.22192	0.194155	0.051095	0.0550346
Prunus_sibirica_newGene_947	0.719853	0.877019	0.698307	0	0	0.098758	0.595401
Prunus_sibirica_newGene_946	0.030119	0.514725	0.598492	0.538224	0.419152	0.58698	0.118952
Prunus_sibirica_newGene_941	0	0	0	0.786686	0.127231	0.588677	0.422045
PaF106G0400016147.01	0.040452	0	0	0	0	0	0.170075
Prunus_sibirica_newGene_943	2.70846	2.77361	3.37712	0.408952	0.511983	0.750123	0.592552
PaF106G0500020355.01	0	0	1.15323	0	0	0	0.170075
PaF106G0200006813.01	7.49776	8.12412	8.55469	2.37405	2.22109	3.41748	0.595118
PaF106G0700026310.01	20.6491	20.7152	22.0218	21.8575	18.8191	22.4171	0.0509382
PaF106G0800032445.01	0	0	0	0	0	0
PaF106G0100001911.01	0	0	0	0	0	0
PaF106G0700028862.01	0	0	0	0	0	0
PaF106G0500021308.01	125.229	123.496	126.76	141.688	134.709	132.176	0.501966
PaF106G0400015398.01	13.8471	13.6984	16.1421	8.5492	10.0487	10.3062	0.548947
PaF106G0400018062.01	0	0	0	0	0	0
PaF106G0600022340.01	242.993	261.446	244.086	217.734	244.338	295.012	0.0521158
PaF106G0300011001.01	78.0838	75.9953	85.5315	89.9129	104.987	102.249	0.493164
PaF106G0400018060.01	0	0	0	0	0	0
PaF106G0400016092.01	0.057867	0.198329	0.112319	0.122375	0.082203	0.174542	0.0507492
PaF106G0200009878.01	0.408787	1.18012	0.745098	1.36983	1.17479	1.15277	0.344384
PaF106G0600024354.01	56.354	63.9018	61.3323	24.9466	27.3601	36.4519	0.579257
PaF106G0100004829.01	0.728325	1.41639	0.861689	0.688013	1.55595	1.5571	0.121279
PaF106G0400018081.01	0	0	0	0	0	0
PaF106G0200009673.01	3.81743	2.41991	4.15498	6.95156	4.95396	6.69622	0.482769
PaF106G0400017114.01	0.077973	0.292448	0.074325	0.806416	0.271559	0.238932	0.263253
PaF106G0700027948.01	11.7627	13.454	15.9453	22.5176	24.4815	21.674	0.567145
PaF106G0400016767.01	0.043116	0	0	0	0.115963	0	0.0967924
PaF106G0300012249.01	13.5219	14.5835	13.5561	12.8646	12.753	10.5578	0.381327
PaF106G0600022071.01	41.6354	46.9082	50.6746	38.1071	32.7715	38.8354	0.462806
PaF106G0200007142.01	0	0	0	0	0	0
PaF106G0400015555.01	1.43521	1.56231	1.51055	0.246663	0	0.508511	0.584494
PaF106G0600023823.01	0.873864	0.556181	0.404232	0.22547	0.094016	0.160155	0.471084
PaF106G0100001913.01	0	0	0	0	0	0
PaF106G0200008350.01	0.915959	1.75904	0.574707	2.82322	2.22197	2.09933	0.468707
PaF106G0400018123.01	0.025853	0.033358	0.049401	0.132276	0.176796	0.259972	0.517286
PaF106G0600022077.01	4.82813	3.86142	4.05622	5.87088	5.16229	4.34976	0.297858
PaF106G0300012247.01	21.6711	19.4623	19.5204	22.4311	22.0765	20.1297	0.230389
PaF106G0200008356.01	0	0	0	0	0	0.014213	0.170075
PaF106G0100001772.01	0	0.048216	0	0	0.074284	0	0.0622304
PaF106G0300012273.01	1.63629	4.08463	3.14882	2.80727	1.8279	1.78135	0.177601
PaF106G0400016765.01	0	0	0	0	0	0
PaF106G0600023821.01	0	0	0.04079	0	0.021797	0	0.0734781
PaF106G0600025705.01	9.91928	10.8733	13.133	12.4019	12.5371	11.7788	0.160011
PaF106G0800029719.01	0.753242	0.91373	1.01461	5.84466	6.4251	5.73253	0.605382
PaF106G0400015759.01	1.41674	0.726938	1.19088	1.38167	1.01415	1.25064	0.0783265
PaF106G0400015646.01	1.29495	1.23945	1.712	2.25993	1.90972	1.97551	0.489515
PaF106G0200008040.01	0	0	0	0	0	0
PaF106G0500019088.01	11.4826	9.55996	10.8964	11.9674	11.0416	12.8706	0.303405
PaF106G0700026409.01	0.103859	0.117958	0.155784	0.349348	0.259022	0.273765	0.55175
PaF106G0700027645.01	1.50672	1.76638	2.16771	2.54068	2.37997	2.65569	0.488111
PaF106G0500021128.01	14.3952	13.5412	14.264	17.6444	19.8156	16.1518	0.490996
PaF106G0400015224.01	1.67346	1.41884	1.26157	1.64228	1.3122	1.89507	0.131599
PaF106G0400018156.01	3.76637	4.32197	4.69444	5.95297	7.43648	4.76688	0.378855
PaF106G0800031098.01	0	0	0	0	0.201263	0	0.170075
PaF106G0400018311.01	25.6445	25.474	23.9459	24.7833	23.1834	24.2721	0.232639
PaF106G0500020860.01	47.2837	49.5347	43.7101	47.0133	39.669	38.9079	0.289044
PaF106G0400015222.01	0.171365	0.748353	0.682076	0.579853	0.766056	0.64315	0.110861
PaF106G0400018154.01	13.1843	13.2529	13.9307	18.5274	17.4112	17.0809	0.585593
PaF106G0400018121.01	0	0	0	0.014495	0	0	0.170075
PaF106G0100004995.01	0	0	0	0.030897	0	0	0.170075
PaF106G0800032134.01	0.170444	0.106452	0.156277	2.22596	2.75865	3.10766	0.591782
PaF106G0100005931.01	1.42705	1.36781	1.47013	0.708134	0.388822	0.962999	0.528799
PaF106G0400018135.01	6.96934	6.32841	6.43552	12.5035	12.6657	11.3518	0.597427
PaF106G0600024356.01	0	0.050951	0	0.320203	0.054309	0.160789	0.358527
PaF106G0200009311.01	3.88038	3.34919	3.87905	3.51486	3.76497	2.85058	0.170641
PaF106G0800031670.01	0.037696	0.248816	0.135668	0.155754	0.130203	0.158198	0.0520167
PaF106G0200009671.01	64.0266	62.225	61.1968	115.412	94.3766	124.131	0.556357
PaF106G0200008976.01	0.108564	0.219275	0.275386	0	0	0.029353	0.508762
PaF106G0400018083.01	3.47909	3.32192	1.2435	1.33605	2.22328	3.74828	0.0584269
PaF106G0300011883.01	6.87374	7.22155	7.9045	13.0794	15.7079	10.9066	0.521772
PaF106G0100001896.01	0.539329	0.629032	0.357969	1.08849	0.431867	0.980018	0.266275
PaF106G0500018903.01	9.28106	10.3178	11.8969	25.9029	16.5152	20.5602	0.503713
PaF106G0700027643.01	38.4109	46.8761	33.7117	56.5913	40.207	38.9423	0.1343
PaF106G0600024132.01	0	0.097033	0.046437	0.226317	0	0	0.0665358
PaF106G0500020888.01	0.072781	0.412137	0.132975	0	0	0	0.348202
PaF106G0200008974.01	0	0	0	0.009258	0.012872	0	0.341298
PaF106G0500019545.01	0.516321	0.705116	0.555414	1.3456	0.676001	0.661414	0.22939
PaF106G0300012153.01	0.186378	0	0.105782	0.040067	0.108654	0.07213	0.0737896
PaF106G0600022889.01	7.41503	9.16148	8.21669	9.31674	9.37494	8.90313	0.317432
PaF106G0800029483.01	15.7387	25.2696	21.6596	12.5221	12.6089	11.1961	0.469085
PaF106G0200006956.01	0	0	0	0	0.059081	0	0.170075
PaF106G0800031622.01	0.398917	0.723164	0.082734	0.261928	0.599218	0.420432	0.0521414
PaF106G0700029252.01	21.9473	21.0865	23.9565	25.7147	26.3546	23.8841	0.430574
PaF106G0400016821.01	0.035707	0.129757	0	0	0	0.060877	0.131579
PaF106G0200008354.01	1.7599	1.97258	1.70033	0.290944	0.293786	0.162073	0.602698
PaF106G0700027551.01	0	0	0	0	0	0
PaF106G0600025707.01	18.1244	18.9281	19.7687	17.7915	16.2894	15.6784	0.459759
PaF106G0200009927.01	0	0	0	0	0	0
PaF106G0600024350.01	13.1978	17.5339	14.1728	14.8485	12.8708	14.9118	0.0861713
PaF106G0400016289.01	0.024726	0.189565	0.198109	0.768416	0.29675	0.546535	0.436303
PaF106G0400017731.01	11.0543	12.7096	12.6149	9.01917	8.15579	9.54631	0.541145
PaF106G0800031676.01	111.035	101.453	117.308	125.039	123.887	124.809	0.472475
PaF106G0200007509.01	1.69122	1.53836	1.57006	2.03301	2.04598	2.15538	0.582217
PaF106G0300014029.01	15.5192	13.0706	13.9857	10.0126	11.224	10.0325	0.536207
PaF106G0800032625.01	61.4099	65.5236	66.4392	67.3416	66.9299	68.3243	0.340665
PaF106G0200009925.01	29.4031	32.0292	32.4012	29.9823	29.7423	26.2292	0.306307
PaF106G0200007907.01	1.86245	3.07802	4.07434	1.6204	2.64711	1.59729	0.258023
PaF106G0800032302.01	0.040422	0	0.036557	0	0	0	0.351504
PaF106G0600021515.01	4.37745	3.30697	5.93115	6.79316	8.22209	7.99353	0.495482
PaF106G0500020886.01	0	0	0	0	0	0
PaF106G0800029485.01	19.4821	23.2069	21.3664	24.7184	23.572	22.7307	0.33805
PaF106G0500019543.01	29.2275	30.9416	30.1387	29.0107	28.8306	27.6485	0.410652
PaF106G0100004993.01	5.71121	3.65111	5.19797	5.25982	9.48741	7.78622	0.342501
PaF106G0800032136.01	0	0	0	5.12325	6.3518	4.38366	0.589096
PaF106G0100005937.01	123.828	115.469	100.651	103.075	93.893	93.4382	0.381615
PaF106G0100001776.01	0	0	0	0	0	0
PaF106G0700025972.01	0.088481	0	0	0	0.106453	0.200337	0.194063
PaF106G0200010865.01	40.3241	39.126	41.8848	45.786	44.2522	42.3183	0.449754
PaF106G0300012037.01	27.2276	28.0783	28.691	27.9625	19.7508	26.7911	0.213513
PaF106G0700027557.01	0.07219	0	0	0.070398	0	0	0.0500452
PaF106G0500020779.01	2.3396	1.0865	0.954657	0	0	0.116965	0.475159
PaF106G0300013246.01	0	0	0	0	0	0
PaF106G0300012031.01	0	0	0	0	0	0
PaF106G0800032422.01	18.4541	20.4261	19.2944	18.5139	18.1426	17.6943	0.361343
PaF106G0200010867.01	0	0	0	0	0	0
PaF106G0700029068.01	0	0	0	0	0	0
PaF106G0600024345.01	54.4234	45.8215	44.9998	31.576	30.1962	32.776	0.555269
PaF106G0500019797.01	152.558	152.58	141.884	130.46	119.403	118.227	0.545903
PaF106G0700029250.01	0.020894	0	0	0	0.007375	0	0.100017
PaF106G0200006954.01	0.051825	0.243297	0.144732	0.511002	0.5984	0.279994	0.451005
PaF106G0700027257.01	0.908741	1.02026	0.835948	0.789888	0.920317	1.74312	0.124265
PaF106G0300013021.01	0.10652	0.147595	0.174973	0.202658	0.377096	0.372696	0.450218
PaF106G0100006119.01	20.4089	25.9933	24.369	15.5696	15.4627	14.6286	0.545531
PaF106G0400016823.01	13.0042	10.9165	10.7836	13.5893	10.6819	10.7376	0.0510239
PaF106G0600024866.01	0	0	0	0	0	0
PaF106G0600025403.01	52.5501	52.9269	46.0729	51.6371	46.6663	44.9304	0.155358
PaF106G0100005935.01	68.5338	63.9263	71.9187	62.1559	67.7038	66.924	0.145874
PaF106G0400016825.01	1.79265	1.7606	2.10213	2.35505	2.92651	2.03809	0.347931
PaF106G0400016980.01	0.126757	0.220677	0.117185	0.53063	0.701412	0.289343	0.447717
PaF106G0100003938.01	11.97	11.1089	11.5555	12.9863	13.5508	12.6638	0.524857
PaF106G0600025401.01	0	0	0	0.210889	0	0	0.170075
PaF106G0400017913.01	1.21003	2.14021	2.70253	2.26077	2.92854	1.76007	0.0900341
PaF106G0800032420.01	5.52559	5.06206	4.51054	3.78047	4.40339	3.97647	0.446672
PaF106G0500019657.01	110.966	116.264	92.4613	105.272	90.9168	87.8296	0.234282
PaF106G0100006525.01	0.380731	0.411075	0.329727	0.140514	0.118102	0.120971	0.591979
PaF106G0800032627.01	0.263701	0.48769	0.487175	0.447301	0.213698	0.298421	0.154512
PaF106G0300013674.01	0.026119	0.174406	0.102399	1.36538	0.869799	0.926591	0.562254
PaF106G0500019541.01	0	0	0	0	0.068459	0	0.170075
PaF106G0700026669.01	4.36156	4.63989	5.92121	5.51948	6.1317	5.29194	0.218664
PaF106G0200007905.01	0	0	0	0	0	0
PaF106G0800029487.01	0	0.085608	0.100932	0.144519	0	0.025908	0.0513908
PaF106G0200006952.01	1.57542	0.288447	0.694785	0.89156	0.574156	0.789878	0.0594444
PaF106G0700026066.01	5.67383	6.23318	4.54817	9.0701	4.20284	5.84607	0.0965048
PaF106G0800032443.01	2.0903	2.1959	2.21163	1.64168	2.64919	1.92599	0.0635274
PaF106G0800031806.01	0	0	0	0	0	0
PaF106G0500019746.01	0.174952	0.125371	0	0.602121	0.29485	0.218065	0.368963
PaF106G0100002969.01	31.9541	40.3689	35.2981	34.867	38.904	51.2506	0.180833
PaF106G0100006401.01	4.33581	3.98235	4.30303	8.09421	8.26386	9.57509	0.589134
PaF106G0300012159.01	0	0	0.173495	90.7273	79.2414	80.5704	0.605549
PaF106G0300014365.01	0.100309	0	0	0	0	0	0.170075
PaF106G0300012033.01	11.6855	11.7819	13.1678	12.3502	9.43818	9.49435	0.297963
PaF106G0800031639.01	0	0	0	0	0	0
PaF106G0300014025.01	19.8878	17.6365	19.1539	21.3585	19.9204	19.211	0.247175
PaF106G0100006283.01	0.247323	0.447786	0.420784	0	0.357934	0	0.333428
PaF106G0100000101.01	0	0.191334	0	0	0	0	0.170075
PaF106G0800032621.01	0	0	0	0	0	0
PaF106G0500020798.01	21.2494	20.4845	18.993	20.2375	20.5813	20.5158	0.0628603
PaF106G0400015697.01	1.10835	0.693047	0.860229	0.962557	1.14761	0.592289	0.0506433
PaF106G0700028527.01	27.821	31.0771	32.4182	39.1701	35.5638	34.8861	0.474765
PaF106G0200007722.01	8.6697	9.19244	9.55892	8.09023	8.3556	7.60274	0.481807
PaF106G0100000103.01	1.47084	1.59658	2.24083	2.29987	1.97495	1.5164	0.082846
PaF106G0300011848.01	6.21638	6.21783	6.34483	8.82097	8.62274	7.55797	0.551756
PaF106G0200007407.01	1.91989	2.51257	1.40345	0.440755	1.13365	0.858496	0.460238
PaF106G0800029926.01	0	0.042814	0	0	0	0	0.170075
PaF106G0600022184.01	0	0	0	0	0	0
PaF106G0300014092.01	4.87415	3.82696	4.14041	5.60538	6.00571	5.68714	0.531896
PaF106G0700028842.01	0	0.01582	0	0	0	0	0.170075
PaF106G0100002908.01	3.04084	2.19925	4.40276	3.79243	4.87012	4.76316	0.310312
PaF106G0500019655.01	0	0	0	0	0	0
PaF106G0400015640.01	0	0	0	0	0	0
PaF106G0400017911.01	17.6311	25.7683	23.4602	24.2485	26.4358	30.5357	0.282216
PaF106G0700025906.01	5.06431	2.25509	3.77769	3.83204	3.66658	3.51444	0.0501682
PaF106G0800029361.01	24.1899	20.6902	24.3941	32.27	32.3872	33.7333	0.57967
PaF106G0700028525.01	11.0908	12.3109	10.6457	11.0164	8.74648	11.2059	0.189772
PaF106G0500019623.01	0.610879	0.572522	0.336648	0.164439	0.152901	0.34849	0.43256
PaF106G0200007231.01	0	0	0	0.179346	0	0.127889	0.340734
PaF106G0400018317.01	53.2766	57.2818	60.5998	58.8026	57.1499	51.1864	0.0753537
PaF106G0300011869.01	0.90115	0.259756	0.492696	0.250439	0.309259	0.474501	0.177418
PaF106G0400016885.01	0	0	0	0	0	0
PaF106G0300014363.01	0	0	0	0	0	0
PaF106G0300012409.01	15.535	13.571	15.4934	14.7764	15.5223	15.8131	0.114891
PaF106G0500020838.01	0.457528	0.503615	0.530999	0.636801	0.255487	0.477587	0.0683447
PaF106G0700027668.01	3.14545	4.40757	3.86633	6.29413	5.10805	3.87675	0.29299
PaF106G0700028844.01	17.3557	21.1671	21.6204	16.349	15.2872	14.4874	0.475281
PaF106G0200009317.01	0	0	0	0	0	0
PaF106G0300011763.01	0.867151	1.16774	2.08461	0.508219	0.65401	0.749959	0.348689
PaF106G0300011835.01	0.746596	0.549055	0.750827	1.43564	1.03242	0.681381	0.289523
PaF106G0700026459.01	0	0	0.45727	0.411174	0.601706	0	0.13043
PaF106G0600021386.01	3.45354	2.80667	3.44789	4.59063	5.2735	3.61623	0.403041
PaF106G0700028610.01	0	0	0	0	0	0
PaF106G0500020615.01	5.24526	5.11212	6.62175	6.74463	6.1921	6.59888	0.299626
PaF106G0100004750.01	0	0	0.03129	0	0	0	0.170075
PaF106G0200007720.01	0	0	0	0	0	0
PaF106G0100005103.01	0.914745	0.811085	1.43803	1.99321	2.1708	1.8909	0.535499
PaF106G0800030474.01	0.690546	1.08504	0.558246	1.30461	0.829197	0.336846	0.0528794
PaF106G0100001349.01	0	0	0	0	0	0
PaF106G0800029454.01	36.8621	34.5927	36.4258	17.7041	19.4273	19.2657	0.60423
PaF106G0300013384.01	0	0	0	0	0	0
PaF106G0400016883.01	0.094425	0.079343	0.187106	0.03717	0.044565	0	0.421262
PaF106G0100000435.01	67.5734	66.4116	72.8181	81.2558	84.272	81.448	0.565353
PaF106G0600023462.01	0.293316	0.467782	0.095478	0.186249	0.374777	0.636395	0.109795
PaF106G0200009884.01	0.075471	0.936401	0.042663	0	0	0	0.210313
PaF106G0400016640.01	0	0	0	0	0	0
PaF106G0500019976.01	6.39795	6.83413	7.74545	9.01706	8.0751	7.67405	0.386108
PaF106G0300013386.01	0.535222	0.043178	0.068262	0	0.093472	0	0.196248
PaF106G0300011837.01	5.27142	4.59877	5.96454	5.37296	7.23718	5.49722	0.180586
PaF106G0100004674.01	1.8875	2.1515	1.119	0.832526	1.99368	0.453981	0.194665
PaF106G0600024039.01	27.6757	25.8133	28.5462	31.3796	25.3725	28.3368	0.0886687
PaF106G0100004152.01	0	0	0	0	0	0
PaF106G0500020871.01	0.019589	0	0.035309	0	0	0	0.320199
PaF106G0100004243.01	36.3166	30.8831	33.4143	20.9811	18.7882	17.8306	0.581987
PaF106G0100003880.01	25.5445	24.0716	26.5306	53.813	33.1906	56.6027	0.462819
PaF106G0300013177.01	0	0	0	0	0	0
PaF106G0100006755.01	19.5541	19.7331	21.9841	28.7281	31.587	25.7564	0.531871
PaF106G0100004752.01	0.311057	0	0	0	0	0	0.170075
PaF106G0800032619.01	1.59376	1.69179	1.44164	3.62417	3.35623	2.84822	0.576439
PaF106G0300011954.01	4.00932	3.03084	4.17184	7.93185	5.03061	8.3986	0.463584
PaF106G0100004241.01	1.54456	1.63005	1.43599	1.80459	1.66929	2.09153	0.396382
PaF106G0700027490.01	0	0	0	0	0	0
PaF106G0300011742.01	13.0609	12.8621	11.8733	13.8122	12.6064	13.0222	0.185013
PaF106G0100000437.01	12.7796	10.9013	13.7217	18.6422	20.2311	17.4165	0.554776
PaF106G0700027375.01	11.1313	10.5598	13.1001	13.8963	14.5583	15.8576	0.481158
PaF106G0700029181.01	0.255407	0.222491	0.443547	0	0	0.125611	0.480525
PaF106G0800030617.01	33.2346	36.012	37.8645	32.229	35.4243	34.5061	0.170511
PaF106G0600025807.01	0.784621	9.81861	0	10.0003	0	5.16556	0.0677597
PaF106G0300011576.01	0.622213	0.709989	0.59155	3.68735	1.24538	3.21526	0.441733
PaF106G0100000120.01	0.674118	0.86217	0.388922	0	0	0	0.537943
PaF106G0100000254.01	297.978	282.263	317.923	316.01	377.13	358.039	0.410341
PaF106G0200009823.01	51.5688	54.4739	52.2106	45.5716	44.137	39.9654	0.546684
PaF106G0700029126.01	24.3809	26.0692	28.3862	25.5307	24.0817	22.4592	0.27672
PaF106G0600021892.01	0	0	0	0	0	0
PaF106G0100000256.01	0	0	0	7.02336	7.42546	8.56729	0.602595
PaF106G0600023556.01	0	0.035671	0	0	0	0	0.170075
PaF106G0500021110.01	19.6259	19.1371	16.3486	15.9573	13.6824	12.1501	0.456644
PaF106G0500018574.01	0	0	0	0	0	0
PaF106G0300013560.01	1.01318	1.8095	1.48249	1.49942	1.7606	1.64334	0.135651
PaF106G0300012834.01	1.64339	1.14725	1.49985	1.04173	0.659314	0.651731	0.481048
PaF106G0600022430.01	5.5678	5.76353	6.49013	7.58216	8.45066	7.71643	0.547944
PaF106G0100003289.01	0	0	0	0	0	0
PaF106G0800030796.01	0	0	0	0	0	0
PaF106G0300011839.01	20.7355	21.2231	21.4551	21.1091	21.8714	19.9596	0.0599699
PaF106G0100004672.01	0.735918	0.482946	0.873103	0.883898	1.39333	1.09628	0.391147
PaF106G0400015995.01	26.7553	28.1851	28.2909	30.3153	30.6661	26.529	0.171802
PaF106G0100004051.01	9.89977	11.2878	12.0814	15.3383	14.7769	14.0359	0.543867
PaF106G0100003551.01	1.02357	1.01463	0.676582	0.370108	0.433349	0.209123	0.5266
PaF106G0200008163.01	0.249736	0.513007	0.401428	0.163752	0.184676	0.141252	0.453268
PaF106G0100003792.01	0	0	0	0	0	0
PaF106G0500019247.01	5.52792	5.99885	5.79902	8.30668	6.16272	6.19568	0.276333
PaF106G0100001978.01	0.077167	0.12311	0	0	0	0	0.331028
PaF106G0400014713.01	0.132002	0.085914	0.269219	0	0	0.057922	0.410285
PaF106G0100003007.01	22.6407	20.6966	23.573	21.989	26.192	24.3746	0.223827
PaF106G0300014151.01	19.9255	21.2178	25.3692	22.5317	23.6539	23.0043	0.0887812
PaF106G0600023554.01	41.7513	41.8881	47.8655	52.1231	55.1786	60.1781	0.510848
PaF106G0400014869.01	0	0	0	0.015177	0	0	0.170075
PaF106G0200010458.01	0	0	0	0	0	0
PaF106G0400016488.01	32.4467	34.0732	37.9616	29.5541	29.3591	27.4756	0.488
PaF106G0500021116.01	12.7365	13.019	15.0468	17.747	18.2526	16.3493	0.522316
PaF106G0100006149.01	200.987	217.227	202.833	217.666	253.575	243.059	0.428395
PaF106G0300013353.01	0	0	0	0.214097	0.099631	0	0.303121
PaF106G0800030408.01	7.98063	6.75792	5.92172	2.51911	3.03819	2.08058	0.571329
PaF106G0100001314.01	3.0704	4.07455	4.24503	1.4629	1.53174	1.15328	0.567759
PaF106G0700029187.01	0	0	0	0	0	0
PaF106G0200006849.01	0	0	0	0	0	0
PaF106G0100002486.01	0	0	0	0	0	0
PaF106G0800030074.01	95.3054	88.3366	118.778	115.698	123.477	121.557	0.359238
PaF106G0400014774.01	0	0	0	0	0	0
PaF106G0300014023.01	23.5977	23.3248	26.0539	29.2238	28.9617	30.6899	0.550399
PaF106G0100003305.01	0	0	0.054397	0	0.186418	0.053742	0.18244
PaF106G0400017613.01	12.7046	13.819	15.0364	15.8689	15.1286	14.479	0.298681
PaF106G0500020862.01	0	0	0	0	0	0
PaF106G0400017322.01	0	0.041888	0	0	0	0	0.170075
PaF106G0400014715.01	0	0	0	0	0	0
PaF106G0300013562.01	35.4829	33.7062	38.2935	49.2484	51.3993	46.4108	0.572554
PaF106G0400016194.01	0	0	0	0	0	0
PaF106G0300012528.01	0	0	0	0	0	0
PaF106G0300014130.01	0.252291	0.556683	0.688201	1.73129	1.36181	1.21985	0.538858
PaF106G0600022436.01	56.7096	56.7235	57.726	33.8428	37.5203	36.9436	0.603278
PaF106G0300012836.01	0.294651	0.110934	0.099008	0.002055	0.046109	0.102005	0.304236
PaF106G0100004506.01	1.84317	1.64372	1.80144	2.45569	3.34801	2.23515	0.430856
PaF106G0400015753.01	1.09715	1.10662	1.27861	0.937634	1.27765	1.24411	0.0505536
PaF106G0500020495.01	0.811437	0.901081	0.500026	1.05891	0.949228	0.481551	0.0756944
PaF106G0200007146.01	6.09115	4.86666	5.81823	8.39015	6.91751	8.2623	0.506463
PaF106G0200009018.01	45.9544	47.4571	47.7025	37.017	39.8949	39.9607	0.577599
PaF106G0100000711.01	0.005337	0	0	0	0	0	0.170075
PaF106G0800032822.01	0	0	0.062127	3.23682	3.56689	3.93399	0.603266
PaF106G0100001667.01	0	0	0	0	0	0.303494	0.170075
PaF106G0100003303.01	2.13467	2.12408	2.76406	3.19765	2.10172	3.19151	0.202342
PaF106G0200009620.01	10.8348	12.3399	14.2631	11.9952	11.0941	11.2906	0.168192
PaF106G0400015663.01	12.8728	12.9487	11.8086	8.33377	9.3667	8.52547	0.581795
PaF106G0700028948.01	0	0	0	0	0	0
PaF106G0300014153.01	10.0261	8.31112	9.71426	9.06786	10.1728	8.52494	0.0525249
PaF106G0500021114.01	0	0	0	0.033462	0	0.042184	0.34687
PaF106G0300013564.01	10.6294	12.5442	13.1396	10.2431	9.21969	9.19316	0.46537
PaF106G0300013908.01	57.7084	52.7723	52.2562	63.6539	60.8229	58.3431	0.45164
PaF106G0800030919.01	1.5696	1.43169	1.70785	2.64437	2.18219	2.02103	0.493182
PaF106G0600022434.01	119.698	113.451	101.668	86.385	79.2666	78.0197	0.549654
PaF106G0800031905.01	2.66918	2.55066	2.93017	2.94386	4.08672	2.31291	0.122896
PaF106G0400018139.01	7.80139	7.81218	7.78363	7.4905	7.46299	7.08663	0.490744
PaF106G0600024768.01	0.015484	0	0.027182	0.028056	0.049653	0	0.116628
PaF106G0100005554.01	37.8645	37.791	36.669	30.0148	32.2557	31.4028	0.584079
PaF106G0600025040.01	0	0	0	0	0	0
PaF106G0100003320.01	12.6363	14.2195	13.1753	22.4111	16.5072	19.7313	0.493129
PaF106G0200010152.01	31.8187	30.9362	35.7281	57.9524	57.0483	61.5072	0.598718
PaF106G0700028343.01	18.8342	18.3961	18.1138	20.3171	19.0544	18.4102	0.241574
PaF106G0700026546.01	42.1809	39.1427	35.9228	41.2822	39.2882	39.2828	0.0781786
PaF106G0800031126.01	0.678209	0.839199	0.98886	0.549118	1.35458	1.38086	0.15118
PaF106G0400017324.01	0	0	0	0	0	0
PaF106G0600022885.01	16.9966	15.5275	16.7381	15.8261	17.8404	15.3611	0.0511151
PaF106G0400014717.01	0	0	0	0	0	0
PaF106G0100004872.01	31.8288	28.8324	27.5574	33.18	33.9305	32.2358	0.438241
PaF106G0600024183.01	23.4938	25.7141	26.0039	28.4614	29.3559	26.4928	0.427293
PaF106G0400015661.01	11.281	12.7768	11.5695	16.5122	15.9879	13.2686	0.464902
PaF106G0100005105.01	6.43131	6.81728	5.58019	8.54259	10.5053	8.61193	0.515211
PaF106G0500019665.01	21.3893	20.5677	21.3157	13.3187	15.8544	14.5612	0.585112
PaF106G0500021331.01	35.8751	33.8157	36.5278	32.1683	32.855	31.8242	0.497104
PaF106G0100001765.01	2.1797	2.30246	3.95324	1.07484	0.950926	0.710324	0.478884
PaF106G0800030573.01	0.080723	0.05825	0.027193	0.046994	0.029702	0	0.257217
PaF106G0100003024.01	110.248	118.939	116.575	115.185	123.913	118.259	0.182201
PaF106G0100005998.01	0.618846	0.536017	0.387851	2.7965	2.27452	1.47371	0.525911
PaF106G0100003301.01	21.6992	19.0932	22.6243	33.6343	28.9989	32.1703	0.564823
PaF106G0200010312.01	0	0	0	0	0	0
PaF106G0600024138.01	46.4973	43.3132	47.3448	24.8654	23.3908	24.3656	0.602549
PaF106G0400017043.01	20.0967	21.0473	22.4687	24.8598	26.3312	25.5809	0.554802
PaF106G0400017326.01	15.3279	18.8707	11.1022	19.9864	14.056	20.4832	0.171668
PaF106G0800029489.01	0	0	0	0	0	0
PaF106G0700028341.01	444.297	411.896	383.54	387.685	362.328	368.792	0.367806
PaF106G0100003662.01	0.0632	0.142159	0.4018	0.456605	0.088205	0.384836	0.115503
PaF106G0100004154.01	26.4186	27.3902	30.5069	38.3449	37.4219	38.334	0.581732
PaF106G0200010310.01	0	0	0	0	0	0
PaF106G0100003809.01	57.7353	62.7728	60.4338	41.8015	46.6562	47.9138	0.567816
PaF106G0600025180.01	0	0	0	0	0	0
PaF106G0500018888.01	39.9691	41.8113	36.8496	45.8032	37.0102	37.4625	0.0541776
PaF106G0600024522.01	30.5972	28.9915	26.4464	22.0172	25.2541	25.9321	0.415774
PaF106G0700026652.01	3.72585	4.09926	3.62586	3.38878	2.42891	3.71523	0.278262
PaF106G0100004083.01	0.315899	0.465479	0.325595	0.301325	0.474692	0.128979	0.0995643
PaF106G0500020499.01	0	0	0	0	0	0
PaF106G0700026755.01	2.19483	2.48689	3.62266	5.50557	5.92998	4.40788	0.51588
PaF106G0600021850.01	66.3014	65.5681	68.9559	122.776	119.639	116.932	0.606383
PaF106G0700027540.01	0	0	0.430389	0.746004	0.47745	0.563351	0.440667
PaF106G0300011310.01	0	0	0.066481	0	0.111973	0	0.0671245
PaF106G0400016839.01	0	0	0.143795	0	0	0	0.170075
PaF106G0700026219.01	0.874747	1.53388	1.71574	1.31698	1.79928	1.68008	0.125249
PaF106G0600021852.01	0.638313	0.462072	0.574475	0.651857	1.10878	0.503479	0.177536
PaF106G0300011312.01	0	0	0	0	0	0
Prunus_sibirica_newGene_541	0.1769	0.268259	0	0.119729	0	0	0.215812
PaF106G0700027940.01	6.95184	5.98252	6.51149	28.7575	24.9152	29.2101	0.601425
Prunus_sibirica_newGene_543	0.289212	0.59524	0.705107	0.164621	0.099283	0.212595	0.451248
Prunus_sibirica_newGene_542	1.93098	2.54415	2.02639	1.3009	1.35248	1.42399	0.522426
PaF106G0100000439.01	0.379743	0.498059	0.341109	0.157852	0.205239	0.263883	0.49292
PaF106G0500021213.01	3.88847	4.26336	4.22769	6.89622	7.5044	8.08338	0.589382
PaF106G0500019510.01	13.0707	12.5522	12.1812	10.3558	12.1459	11.6675	0.358358
PaF106G0600024764.01	0	0	0	0	0	0
PaF106G0800030706.01	15.3977	20.5356	23.5443	16.5998	14.7695	11.646	0.348386
PaF106G0700028003.01	18.748	32.5913	31.0707	23.9713	31.1082	32.9344	0.0683177
PaF106G0600024520.01	50.308	57.0245	56.3408	66.1491	62.6604	61.1038	0.484648
PaF106G0700027307.01	0	0	0	0	0	0
PaF106G0100006247.01	3.26723	5.66116	6.63898	3.44745	2.82435	3.84103	0.311722
PaF106G0700027795.01	0	0.064543	0	0.128184	0.145847	0.057303	0.422954
PaF106G0200010831.01	0	0	0	0	0	0
PaF106G0700027961.01	161.479	171.221	181.128	191.47	198.99	199.418	0.51865
PaF106G0600025186.01	3.72596	3.88877	4.3686	7.0665	8.83582	6.71865	0.550364
PaF106G0200008135.01	3.74028	2.71247	4.49427	4.88598	7.0587	6.61327	0.461966
PaF106G0200008283.01	21.4523	22.3081	21.9495	23.8789	27.2299	24.681	0.476601
PaF106G0100002434.01	0.140849	0	0	0	0	0	0.170075
PaF106G0600023670.01	5.15685	8.57483	5.03052	7.23768	5.22821	6.42314	0.0501516
PaF106G0500020368.01	5.19067	8.3183	8.50345	4.53415	3.40388	3.46827	0.468732
PaF106G0800029468.01	14.5209	14.2354	16.149	13.8782	13.8585	10.7475	0.319133
PaF106G0300012405.01	4.71094	4.20042	5.32529	5.70808	6.4107	6.08211	0.48974
PaF106G0500021372.01	14.59	14.4389	14.7234	15.4217	15.9182	13.9841	0.149573
PaF106G0600023468.01	0	0	0	0	0	0
PaF106G0200009319.01	0.948164	1.17084	1.67457	2.98583	2.11555	1.6063	0.370637
PaF106G0600022252.01	4.72603	7.31135	7.24834	4.92549	4.45678	7.12142	0.129064
PaF106G0400015341.01	0.657825	0.577167	0.745203	1.52725	1.98699	2.74541	0.515184
Prunus_sibirica_newGene_364	1.61525	1.17643	1.32477	0	0.023433	0	0.593727
PaF106G0500019684.01	3.89031	4.04959	5.51979	19.9185	20.3162	21.0906	0.606176
PaF106G0800032720.01	17.8636	15.3241	16.8312	17.3035	18.5876	18.875	0.320763
PaF106G0500020022.01	0	0.000438	0	0	0	0.079054	0.168979
PaF106G0600023717.01	0	0	0	0	0	0
PaF106G0500021215.01	1.19665	0.312344	0.227732	0.740843	1.68646	0.903095	0.219615
PaF106G0700027942.01	0	0	0	0	0	0
PaF106G0800032449.01	0.103621	0.196662	0.158356	1.50292	1.51563	1.38403	0.606319
PaF106G0100002064.01	16.9847	16.5131	16.3813	11.3482	12.1341	13.4301	0.573672
PaF106G0200007759.01	0.018592	0	0.005418	0.067842	0	0	0.102728
PaF106G0200010837.01	13.7959	13.8772	12.383	14.5821	13.7737	13.8293	0.227744
PaF106G0800032571.01	0	0	0	0	0	0
PaF106G0300014376.01	0	0	0	0	0	0
PaF106G0400014782.01	46.6673	46.4464	45.7277	48.5123	49.2192	47.9972	0.547587
PaF106G0100005546.01	5.79693	6.68436	7.16628	13.1383	12.3446	11.9978	0.595672
PaF106G0100006241.01	19.6956	21.5575	19.5235	19.6722	23.8678	24.6906	0.26389
PaF106G0700027855.01	0	0.136435	0	0.029178	0	0.122847	0.0511222
PaF106G0300013924.01	7.10239	6.98537	8.941	9.17564	8.32189	8.08085	0.207736
PaF106G0200010337.01	1.23448	0.878219	1.26509	0.543184	0.20567	0.2006	0.541844
PaF106G0300012462.01	21.3173	21.5477	22.9887	20.1202	21.342	19.2309	0.371865
PaF106G0500019670.01	0.005056	0.016491	0.073309	0.045152	0.069729	0	0.0573357
PaF106G0800029568.01	3.19383	4.38934	4.74561	5.15747	4.34741	5.56451	0.277622
PaF106G0800031581.01	0	0	0	0	0	0
PaF106G0500020024.01	7.00824	8.303	7.486	10.2258	10.7687	8.80613	0.484168
PaF106G0100003443.01	1.18654	1.4636	1.29251	1.92828	1.72943	1.15287	0.205113
PaF106G0300012460.01	189.458	213.935	229.067	221.66	192.407	206.246	0.0613262
PaF106G0200008019.01	3.5729	3.61964	3.89882	3.65079	3.77162	4.12172	0.144385
PaF106G0700026432.01	29.2037	27.4981	28.8567	23.862	23.1944	21.9022	0.576569
PaF106G0800031583.01	0	0	0	0	0	0
PaF106G0700026177.01	0.094636	0	0	0	0	0	0.170075
PaF106G0800029745.01	27.9001	24.4191	27.5191	31.2693	32.4979	28.5277	0.423584
PaF106G0100004885.01	0	0	0	0	0.085569	0	0.170075
PaF106G0200008777.01	78.2734	72.5892	67.8504	53.9592	44.2225	47.9979	0.561879
PaF106G0800032573.01	4.48139	3.27611	3.73951	0.972167	1.0827	0.919368	0.583041
PaF106G0700028746.01	0.029545	0.043014	0.048702	0.003671	0.028438	0	0.444922
PaF106G0300013693.01	0	0	0.30814	0.807815	0.362414	0.28945	0.352766
PaF106G0400015343.01	14.2441	15.6985	15.0861	14.7368	15.5365	13.5993	0.0909305
PaF106G0100006049.01	0.968432	0.813506	0.761675	0.068814	0	0	0.597886
PaF106G0600022339.01	23.0817	27.058	27.865	29.976	29.2675	28.5283	0.369448
PaF106G0700027440.01	0	0	0	0	0	0
PaF106G0700026540.01	0.011559	0.072776	0.107992	0.062752	0.120903	0.127785	0.197426
PaF106G0700027172.01	2.55699	3.4434	3.39733	3.15523	4.15385	3.659	0.226881
PaF106G0400015345.01	80.5246	92.8621	84.3476	54.075	63.5159	69.3409	0.52
PaF106G0700028744.01	2.79495	3.66604	3.66451	2.42765	3.20547	2.45103	0.314974
PaF106G0400014735.01	12.9123	14.1627	14.8705	13.5327	15.1053	13.1125	0.0508692
PaF106G0700026631.01	0	0.030175	0.036871	0.075147	0.033607	0.058859	0.355929
PaF106G0300013691.01	1.36701	2.1191	3.10107	6.76724	6.53793	7.04696	0.587134
PaF106G0700027442.01	0	0	0.049958	0	0	0	0.170075
PaF106G0100004810.01	3.05798	3.48087	4.52171	5.38131	5.43155	3.77243	0.302185
PaF106G0100006015.01	380.546	394.942	353.644	311.342	299.403	296.893	0.560028
PaF106G0400018078.01	3.04609	4.57245	2.956	1.90703	1.6025	1.31652	0.491272
PaF106G0200009628.01	93.4095	103.55	83.6615	83.536	70.837	68.5496	0.425747
PaF106G0100004578.01	2.00081	3.33877	2.06377	6.18728	6.30404	6.06368	0.585369
PaF106G0600022123.01	4.0709	3.64494	4.12504	2.2981	1.86875	1.86689	0.589336
PaF106G0100002713.01	0	0	0	0	0	0
PaF106G0500018605.01	0	0	0	0	0.058949	0	0.170075
PaF106G0300014234.01	20.651	21.9774	23.2933	25.1979	26.1372	23.8486	0.464363
PaF106G0100001561.01	0	0	0	0	0.043448	0	0.170075
PaF106G0500019225.01	0	0	0	0	0.00312	0	0.170075
PaF106G0800031435.01	397.611	389.555	407.947	336.166	352.636	428.047	0.151857
PaF106G0200008771.01	0	0.050089	0	0	0.058783	0	0.0518109
PaF106G0800030575.01	0	0	0.022353	0	0	0	0.170075
PaF106G0300014236.01	0	0	0	0	0	0
PaF106G0100002711.01	2.56198	2.20276	2.2758	2.16182	2.78466	2.89449	0.180827
PaF106G0500019249.01	4.6149	6.31157	7.58948	6.35279	7.6923	6.8738	0.140626
PaF106G0800031437.01	3.21131	1.99486	2.973	3.71041	5.39016	4.11767	0.432896
PaF106G0300010963.01	58.6808	58.5405	57.5338	60.0278	62.5742	71.651	0.326909
PaF106G0300013069.01	0	0	0	0	0	0
PaF106G0700026633.01	0	0	0	0	0	0
PaF106G0700026430.01	7.13825	4.90982	7.38478	11.0726	12.4209	10.2308	0.538948
PaF106G0100004931.01	12.8041	13.8021	14.131	13.0564	12.5218	11.0541	0.337858
PaF106G0300011985.01	0	2.58386	0.864484	0.950191	0	0	0.17246
PaF106G0800032111.01	3.80679	5.17999	4.77538	7.16421	10.041	8.22452	0.522303
PaF106G0600021721.01	5.86687	6.34949	7.55105	5.70258	7.33626	7.71951	0.0739733
PaF106G0200010653.01	4.52784	4.99588	5.39479	3.90294	4.29935	3.8157	0.482143
PaF106G0700026654.01	1.65634	2.05939	1.77494	1.4822	2.2773	2.41955	0.119227
PaF106G0600025048.01	74.4839	78.216	72.2888	78.6775	71.3799	64.332	0.129662
PaF106G0500020896.01	0	0	0	0	0	0
PaF106G0100002047.01	4.9969	4.99965	7.17324	9.90761	11.9182	12.4326	0.554186
PaF106G0600023248.01	14.8877	14.9517	16.247	19.525	21.3586	19.5881	0.569485
PaF106G0200010524.01	0.888378	0.883771	0.802725	1.0702	0.978489	0.80458	0.194389
PaF106G0300014238.01	19.6452	20.9476	19.8082	23.2607	22.3019	20.2467	0.328309
PaF106G0300011932.01	0	0	0	0	0	0
PaF106G0100004816.01	9.24824	9.94582	9.15575	4.64898	5.10638	3.98554	0.596814
PaF106G0100006017.01	10.6954	11.9767	12.9705	13.3073	10.5411	12.3565	0.0545795
PaF106G0200009368.01	2.93741	2.46099	3.3182	3.38413	4.57001	5.35307	0.410382
PaF106G0800031649.01	0	0	0	0	0	0
PaF106G0400018289.01	59.9924	51.5852	51.3799	55.7339	53.3092	49.7887	0.073861
PaF106G0400017110.01	1.71601	1.78266	1.35963	1.52253	1.76778	1.20546	0.0951623
PaF106G0700026436.01	0	0	0	0	0	0
PaF106G0700025944.01	38.1113	39.3762	38.0689	40.0214	42.146	47.0482	0.372703
PaF106G0700027618.01	85.1457	81.4426	82.7197	70.944	61.1644	72.0431	0.521839
PaF106G0100000034.01	64.253	57.4214	67.4098	99.6964	84.2127	107.745	0.534832
PaF106G0300013123.01	37.3624	35.8187	36.2433	39.1123	37.2461	36.9665	0.285921
PaF106G0300012188.01	431.546	550.323	550.483	423.531	358.484	385.302	0.441861
PaF106G0600024762.01	0	0	0	0	0	0
PaF106G0800032787.01	11.6625	13.1507	13.8332	11.8253	9.44184	10.583	0.405453
PaF106G0200010651.01	72.8602	72.8727	74.7849	75.1914	76.0363	76.3295	0.47707
PaF106G0100005612.01	0.728126	0.197423	0.87898	0.355285	0.372788	0.962459	0.0524979
PaF106G0500020890.01	0	0.054248	0.175338	0	0	0	0.264255
PaF106G0800030794.01	0	0	0	0	0	0
PaF106G0500019742.01	0.393902	0.558641	0.357255	0.834741	0.232125	0.214636	0.0502806
PaF106G0300010965.01	25.1318	27.5754	30.0085	31.7048	29.7717	30.5409	0.359184
PaF106G0400016208.01	494.6	443.499	472.744	544.294	550.698	574.025	0.54541
PaF106G0300012494.01	0.558431	0.329262	0	0	0.349084	0.587157	0.0506771
PaF106G0300014219.01	0	0	0	0	0	0
PaF106G0600024850.01	0.080078	0	0	0.377601	0.209987	0.159612	0.46974
PaF106G0800032216.01	0	0	0	0	0	0
PaF106G0600022954.01	0	0	0	0	0	0
PaF106G0300014076.01	0.294381	0.215307	0.064978	0.313296	0.245395	0.045823	0.0512902
PaF106G0300012685.01	0.654553	1.00523	0.680063	0.755311	0.548453	0.584317	0.202278
PaF106G0800032210.01	4.38782	4.47312	4.59859	2.23738	3.06996	2.5021	0.579067
PaF106G0200010257.01	19.6901	16.2789	16.6885	25.5484	26.0811	26.062	0.580676
PaF106G0800032785.01	0	0	0	0	0	0
PaF106G0300013125.01	85.6843	79.8933	80.0061	63.4341	64.6468	57.5959	0.574401
PaF106G0500019274.01	0	0	0	0	0	0
PaF106G0600023246.01	0	0	0	0	0.076385	0	0.170075
PaF106G0300013678.01	62.6863	68.5096	59.3391	32.3073	27.157	26.8723	0.594417
PaF106G0200010587.01	126.42	127.54	135.293	160.401	159.196	149.692	0.565208
PaF106G0300012492.01	0.086969	0.160098	0.128243	0.287601	0.340027	0.306745	0.576561
PaF106G0500020700.01	0	0	0	0	0	0
PaF106G0400017328.01	0.409304	0.167489	0.220619	0.187151	0.422139	0.230414	0.0526771
PaF106G0400017502.01	21.1657	20.5946	22.26	19.773	18.2082	18.9291	0.49587
PaF106G0300013034.01	0	0	0	0	0	0
PaF106G0300011255.01	21.1145	24.9373	27.4714	9.56041	9.59237	10.0445	0.58273
PaF106G0600024688.01	18.5045	17.7338	18.9033	21.0762	23.1139	21.4523	0.544003
PaF106G0700029037.01	0	0	0	0	0	0
PaF106G0300014074.01	8.22783	8.35279	7.01227	7.87867	8.3182	6.26946	0.0839429
PaF106G0200010255.01	0.082009	0.085489	0.138795	0.292923	0.406343	0.124024	0.359857
PaF106G0300012683.01	0	0	0	0	0	0
PaF106G0400017614.01	125.969	128.366	140.742	164.1	135.48	155.432	0.363285
PaF106G0100005610.01	0	0	0	0	0	0
PaF106G0200007975.01	0.081848	0.071535	0.192004	0.188402	0.132292	0.119202	0.117152
PaF106G0400016461.01	3.91295	3.77225	4.37411	3.08017	3.14007	3.72758	0.421473
PaF106G0500020892.01	0.018272	0	0	0	0	0	0.170075
PaF106G0400014980.01	1.11966	0.90432	0.89724	1.06219	0.794095	0.815918	0.12063
PaF106G0200007632.01	0	0	0	0	0	0
PaF106G0100003525.01	1.07543	1.53838	2.27086	2.43467	2.38636	1.62775	0.209652
PaF106G0400016463.01	0	0	0	0	0	0
PaF106G0600021660.01	0	0	0	0	0	0
PaF106G0100003523.01	13.4281	12.8295	12.4642	13.5266	13.2918	12.0351	0.0509379
PaF106G0600024185.01	0	0	0	0	0	0
PaF106G0600025438.01	0.214346	0.225106	0.327602	0.214563	0.776498	0.216597	0.12681
PaF106G0700028523.01	0.213297	0.575736	0.590546	0.386177	0.606369	0.449198	0.0531412
PaF106G0100003404.01	0	0	0	0	0	0
PaF106G0300011257.01	12.3388	13.816	15.5781	20.8564	22.1329	18.0933	0.525425
PaF106G0400017504.01	19.5569	23.0596	23.5218	13.8503	21.6638	15.7688	0.331116
PaF106G0800030159.01	0.943806	1.05358	1.64638	1.56265	1.348	1.31223	0.137979
PaF106G0800032212.01	11.833	12.1283	11.6599	10.7659	12.2048	10.989	0.206941
PaF106G0300011435.01	0.43808	0.493433	0.490778	0.892434	0.498284	0.742072	0.358013
PaF106G0200009448.01	0	0	0	0	0	0
PaF106G0500019238.01	9.71748	8.6304	10.1256	11.0895	8.31752	11.1319	0.108976
PaF106G0300013127.01	0	0	0	0	0	0
PaF106G0400017387.01	2.57756	1.76896	2.85429	0	0	0	0.578532
PaF106G0300011413.01	438.806	443.798	479.125	520.276	576.995	572.836	0.536821
PaF106G0100003639.01	1.01692	2.77008	1.79333	3.6303	3.68293	5.08922	0.478754
PaF106G0400017616.01	28.7809	27.2951	24.6831	26.8419	23.2518	19.6906	0.274778
PaF106G0400015145.01	0	0	0	0	0	0
PaF106G0400017385.01	0.487547	0.534499	1.52127	0.36016	0.47811	0.441964	0.218571
PaF106G0400017304.01	51.9468	55.378	57.0374	59.4059	55.2014	61.5062	0.294808
PaF106G0600025228.01	0	0	0	0	0.032714	0	0.170075
Prunus_sibirica_newGene_2033	0.05598	0.271003	0	0	0	0	0.233848
PaF106G0600023727.01	0.292406	0.674265	0.43962	0.864899	0.787772	0.548921	0.323478
PaF106G0100006452.01	0	0	0	0	0	0
PaF106G0600021666.01	2.3983	2.68093	4.11489	8.18669	7.2264	6.85592	0.571159
PaF106G0100005109.01	0	0.027266	0.023565	0.177886	0.147255	0.022	0.358242
PaF106G0300012681.01	2.69617	3.13852	3.76421	1.73028	1.50188	2.52647	0.454088
PaF106G0300013811.01	27.0938	25.9476	30.3777	36.925	34.9598	31.479	0.475087
PaF106G0800031036.01	0	0	0	0	0	0
PaF106G0200007333.01	38.0906	42.6199	40.6716	10.4217	11.4674	11.4974	0.605114
PaF106G0100002408.01	0	0	0	0.14942	0.336691	0.323679	0.53239
PaF106G0200008659.01	0.420683	0.2805	0.318651	0.336116	0.193895	0.173262	0.286338
PaF106G0100004167.01	30.0642	28.8777	26.7282	34.0968	30.0993	32.8371	0.41255
PaF106G0500020919.01	12.4015	13.0627	13.125	14.9432	15.4657	14.9257	0.581049
PaF106G0600021593.01	0	0.034767	0.011712	0.089104	0.034752	0.092092	0.431361
PaF106G0500020352.01	9.76975	9.38513	10.2442	13.4406	14.0379	14.016	0.598374
PaF106G0200007335.01	0.187074	0.469055	0.395715	0.255674	0.301286	0.221462	0.178146
PaF106G0300013813.01	3.28873	3.07975	3.30567	3.35093	2.05026	4.41714	0.0506977
PaF106G0300011831.01	32.0439	33.4382	30.7008	35.0474	32.7302	32.9183	0.24704
PaF106G0700026799.01	44.5717	40.2664	61.8489	64.4921	60.737	61.7693	0.35389
PaF106G0300013504.01	1.17246	0.854498	0.368344	0	0	0	0.487896
PaF106G0500020552.01	9.30424	10.441	10.7675	13.6151	14.2558	14.4411	0.581121
PaF106G0100003521.01	0	0	0	0	0.186258	0	0.170075
PaF106G0600024057.01	0	0	0	0	0	0.151801	0.170075
PaF106G0100002953.01	0	0	0	0	0	0
PaF106G0300011133.01	25.4161	21.9311	26.4125	25.0091	16.4845	23.9299	0.155398
PaF106G0400017506.01	1.79417	1.26494	1.19783	0.936675	1.04221	0.833016	0.408081
PaF106G0100004158.01	16.8077	14.8961	17.1872	14.9613	18.2239	15.357	0.0512404
PaF106G0300012894.01	1.20865	1.17038	1.44874	1.1886	1.64815	1.23122	0.0804172
PaF106G0200007207.01	19.0302	23.8096	25.249	24.665	21.6576	22.3598	0.0512847
PaF106G0800031571.01	7.13424	7.49753	8.20031	13.8521	12.2184	11.9855	0.580437
PaF106G0100004937.01	0	0	0	0	0.037453	0	0.170075
PaF106G0200007201.01	0	0	0	0	0	0
PaF106G0400017113.01	0	0	0	0	0	0
PaF106G0300011983.01	199.69	195.106	173.568	144.865	137.617	125.948	0.55563
PaF106G0600023466.01	3.52214	4.06833	2.73518	5.71594	8.09435	5.61215	0.485616
PaF106G0100004165.01	14.1005	13.6593	13.7962	17.2554	17.8283	15.1337	0.491506
PaF106G0400015804.01	60.3631	69.5241	64.8373	65.0166	63.8739	65.3532	0.0505106
PaF106G0800031380.01	10.9333	9.72135	11.1359	15.159	13.279	11.8812	0.436619
PaF106G0100001311.01	0	0	0	0	0	0
PaF106G0400017793.01	11.1334	9.93146	11.6133	13.6232	15.4146	13.0633	0.498928
PaF106G0300011850.01	1.22737	0.648811	0.463799	1.1827	1.20293	1.25429	0.333793
PaF106G0600025226.01	0	0	0	0	0	0
PaF106G0100006454.01	1.07847	1.69424	1.74707	0.899913	0.370929	0.768723	0.467433
PaF106G0600021664.01	34.1989	37.1813	34.9274	36.928	36.0474	40.147	0.264748
PaF106G0200008049.01	91.0665	85.7291	85.4505	97.6359	98.7755	100.04	0.561696
PaF106G0500020863.01	0	0	0	0	0	0
PaF106G0200010722.01	37.5326	39.8667	42.4686	39.262	39.8242	42.1629	0.0606239
PaF106G0500020474.01	14.9881	13.4137	16.0829	14.8779	16.0765	16.0655	0.164276
PaF106G0200008042.01	0.585985	0.175637	0.580051	0.323944	0.048161	0.12334	0.317644
PaF106G0200006785.01	0	0	0	0	0	0
PaF106G0100004012.01	82.2892	71.9988	76.8404	70.5716	69.1141	64.8109	0.423845
PaF106G0300011130.01	43.9082	45.8153	47.7403	37.5157	44.8645	40.5883	0.354428
PaF106G0500020472.01	0	0	0	0	0	0
PaF106G0800031291.01	68.9577	68.7421	74.8792	130.483	97.0136	124.126	0.531194
PaF106G0200010720.01	42.1402	39.4267	38.6812	49.1121	46.7674	42.725	0.449163
PaF106G0100001834.01	0	0	0	0	0	0
PaF106G0400014635.01	0	0	0	0	0	0
PaF106G0200007337.01	0.855761	0.750296	0.751576	1.98539	1.03065	1.93059	0.441678
PaF106G0500019738.01	0.416259	0.41664	0.473061	0	0	0	0.605567
PaF106G0300011833.01	66.6739	69.3767	58.2599	49.4353	42.865	43.5066	0.544906
PaF106G0200009873.01	17.6101	17.1913	15.9215	20.7854	15.5868	17.0161	0.0903786
PaF106G0300012879.01	0	0	0	0	0	0
PaF106G0700028621.01	0	0	0	0	0	0
PaF106G0600022871.01	0	0	0	0	0	0.034369	0.170075
PaF106G0800031013.01	1.70212	1.99742	2.39302	0	0.082548	0	0.591734
PaF106G0400016206.01	0	0	0	0	0	0.021035	0.170075
PaF106G0600022877.01	0	0	0	0	0	0
PaF106G0700028623.01	8.35186	10.0221	9.37265	9.06958	9.50306	10.2071	0.0962765
PaF106G0600023552.01	4.83196	3.11082	3.51873	3.08445	3.77859	3.09305	0.147506
PaF106G0700028333.01	8.88699	8.17632	11.57	13.0521	14.3592	14.9399	0.511609
PaF106G0800030402.01	4.64524	3.68233	4.02211	0.735899	0.893013	0.494471	0.595305
PaF106G0500021249.01	33.1245	28.331	33.2451	31.7359	32.7535	34.2836	0.125304
PaF106G0600022356.01	8.67518	10.8865	15.0833	17.124	20.2884	19.7948	0.495144
PaF106G0400015802.01	201.818	182.232	199.99	175.24	165.332	166.812	0.50131
PaF106G0600023985.01	0.250242	0.282193	0.365041	2.50009	1.89292	2.02557	0.591399
Prunus_sibirica_newGene_940	0	0	0	0.42926	0.438441	0.764641	0.544728
PaF106G0400015226.01	0	0	0	0	0	0
PaF106G0100002186.01	0	0	0	0	0	0.052907	0.170075
PaF106G0100002656.01	1.54874	1.54595	1.58716	1.5216	2.5276	1.86664	0.248082
PaF106G0300011656.01	468.928	430.436	383.246	328.85	305.61	322.927	0.523932
PaF106G0100001942.01	0	0	0	0	0	0
PaF106G0500018709.01	0	0.113496	0.145729	0	0.154543	0.127975	0.0520364
PaF106G0100003053.01	11.9734	13.1371	12.456	12.2742	12.6915	11.2979	0.134559
PaF106G0500018832.01	1.79339	1.84946	1.51781	1.40371	1.34362	1.90497	0.136576
PaF106G0200008353.01	28.8399	30.124	31.1145	25.6022	33.4346	28.8581	0.0633498
PaF106G0300011650.01	0	0	0.420467	0	0	0	0.170075
PaF106G0600023240.01	0	0	0	0	0	0
PaF106G0100002654.01	0.784226	0.760333	0.734095	1.14674	0.641604	0.636977	0.0617129
PaF106G0100002300.01	34.4115	34.6729	33.2569	36.6828	36.1215	33.0367	0.162399
PaF106G0800031076.01	12.3671	20.0498	15.983	21.7632	20.3682	16.5947	0.224688
PaF106G0500020706.01	0.171298	0.14801	0.496143	0.355842	0.269297	0.369791	0.0860092
PaF106G0100002799.01	0.924558	1.37874	0.339409	1.66723	2.7178	0.853066	0.249602
PaF106G0400016200.01	37.9475	37.1307	43.0046	52.3506	40.866	51.8869	0.374325
PaF106G0400015569.01	0	0	0	0	0	0
PaF106G0500020470.01	37.6801	36.4804	37.8036	27.4824	28.3531	27.8925	0.604132
PaF106G0500018904.01	0	0	0	0	0	0
PaF106G0100000618.01	0	0	0	0	0	0
PaF106G0100005369.01	5.25844	6.30501	6.83778	6.37483	8.74011	6.50044	0.208782
PaF106G0100001832.01	1.77039	1.70712	1.96852	0.121314	1.19813	1.19918	0.430972
PaF106G0500019911.01	1.45999	1.96358	2.23317	0.95049	0.661319	0.645892	0.535636
PaF106G0300012825.01	7.66017	8.63373	9.0782	8.54362	8.24399	7.44411	0.116925
PaF106G0100005566.01	24.657	25.2668	27.5438	36.4168	29.8244	32.2908	0.482338
PaF106G0600022285.01	0	0	0	0	0	0
PaF106G0600023987.01	14.5364	15.1078	16.6217	12.6968	12.1317	12.9624	0.524396
PaF106G0500019913.01	0	0	0	0	0.054171	0	0.170075
PaF106G0600024277.01	14.732	14.8069	15.9531	21.9305	20.543	20.1183	0.585491
PaF106G0500019358.01	6.59295	5.83512	7.28408	7.60481	7.93102	8.06466	0.456194
PaF106G0100006169.01	0.963735	0.587295	0.978948	0.980271	0.366791	0	0.221727
PaF106G0600022409.01	0.067474	0	0.043841	0	0	0	0.333944
PaF106G0100003309.01	2.56929	2.36428	4.3102	1.53711	1.21694	1.92118	0.397823
PaF106G0700027825.01	47.1913	48.7957	43.264	64.3775	54.2884	50.8178	0.39241
PaF106G0500018834.01	2.29959	1.60829	1.66542	2.26126	2.86159	2.3834	0.385474
PaF106G0600022875.01	0.224047	0.07436	0.288729	0	0	0.140248	0.335876
Prunus_sibirica_newGene_1410	0.239826	0.285051	0.498572	0.282953	0.211259	0.544079	0.0502112
Prunus_sibirica_newGene_1413	7.94509	9.36043	8.55789	12.1285	12.2142	10.6781	0.539706
PaF106G0600024384.01	0.382367	0.51428	0.568366	0.488619	0.700652	0.401216	0.0722644
Prunus_sibirica_newGene_1417	0.250565	0.271247	0	0	0	0	0.351919
Prunus_sibirica_newGene_1416	0.22661	0.491463	0	0	0	0	0.302207
Prunus_sibirica_newGene_1418	22.7817	23.8251	24.3939	24.4891	21.9103	23.1474	0.0911001
PaF106G0100004629.01	17.1793	14.6558	16.3304	18.1431	19.6852	16.3538	0.296121
PaF106G0600025295.01	148.153	161.15	172.604	202.699	174.408	176.174	0.360993
PaF106G0800029876.01	0.500507	0.264229	0.354448	0.325586	0.136869	0.111841	0.335086
PaF106G0600023550.01	0	0	0	0	0	0
PaF106G0700027157.01	43.9216	43.0131	39.9645	42.7292	43.6954	39.166	0.0581069
PaF106G0100000161.01	111.49	133.905	133.435	112.088	91.651	108.064	0.393621
PaF106G0600022354.01	10.9617	11.2658	12.5852	10.4894	10.7343	10.2988	0.371435
PaF106G0600024597.01	2.13831	0.856014	2.86633	0.885664	1.14962	0.735243	0.307614
PaF106G0400015476.01	0	0	0	0	0	0
PaF106G0100001830.01	3.0133	5.29021	2.92286	3.72981	3.52482	3.98156	0.0500025
PaF106G0200008237.01	1.05461	0.578667	0	0	0	0	0.319165
PaF106G0500018906.01	0	0	0	0.303356	0	0.317565	0.352378
PaF106G0600022352.01	91.8747	98.0263	102.476	94.5766	90.7598	104.995	0.0524123
PaF106G0600024595.01	166.671	167.156	190.986	139.658	129.676	132.435	0.541274
PaF106G0200010227.01	143.395	139.164	122.476	93.2262	91.9931	96.7487	0.567654
PaF106G0200009446.01	0	0	0	0	0	0
PaF106G0200008231.01	18.319	16.276	19.0377	23.4941	24.8721	23.4642	0.569145
PaF106G0700027155.01	39.5884	39.5686	39.1296	35.3625	36.2863	35.281	0.593954
PaF106G0500020491.01	36.5522	36.6259	31.1728	37.4239	36.0368	34.8494	0.110448
PaF106G0400014850.01	9.87343	9.65456	9.37282	12.0724	12.0574	10.145	0.438031
PaF106G0100003897.01	0.105645	0.180108	0.200001	0.222689	0.143994	0.126457	0.0505102
PaF106G0300013195.01	0	0	0	0	0	0
Prunus_sibirica_newGene_2149	3.04685	5.5885	4.79231	4.61257	4.32254	5.35324	0.0675559
PaF106G0300011652.01	0.248252	0.2169	0.231209	0.226586	0.447363	0.156528	0.0852994
PaF106G0300012824.01	0.25235	0.076968	0	0	0	0	0.263019
PaF106G0800031078.01	0	0	0	0	0	0
PaF106G0400016202.01	5.50507	5.27311	5.32572	8.24385	7.76665	8.32701	0.600797
PaF106G0800031962.01	34.8968	34.4334	29.4705	8.80469	8.6289	8.73842	0.600043
PaF106G0500018680.01	0	0	0	0	0	0
PaF106G0100001630.01	5.68509	4.4107	5.77115	5.44666	4.20493	5.67012	0.0616306
PaF106G0400018074.01	0.128283	0.04963	0.394833	0	0	0	0.326068
PaF106G0700028930.01	32.2182	28.3146	33.561	33.4684	31.6409	29.864	0.0534446
PaF106G0100001632.01	49.9823	46.7595	51.1309	52.9423	56.598	50.1786	0.31105
PaF106G0400017815.01	8.28241	8.80845	9.55643	16.3076	10.1913	9.23925	0.239778
PaF106G0600024163.01	0	0.097619	0.221104	0.204769	0.235799	0.012956	0.0811024
PaF106G0800031960.01	15.8132	15.5661	17.3867	16.1725	16.9769	14.5922	0.0699832
PaF106G0500021337.01	2.9341	3.33069	4.04898	3.19773	3.5816	4.0925	0.0775991
PaF106G0800032651.01	2.26117	2.55416	2.49744	0.696433	0.871484	0.999608	0.598118
PaF106G0100005816.01	0.805332	0.114585	0.52856	0.544614	1.96476	1.24818	0.302345
PaF106G0100001617.01	5.96319	6.1565	6.18005	7.20613	8.3143	6.42769	0.380748
PaF106G0200009440.01	0	0	0	0	0	0
PaF106G0600024275.01	0.224595	0	0.130629	0	0.310974	0	0.0520739
PaF106G0200009074.01	39.34	37.0819	37.9286	37.4105	37.3154	34.6901	0.265673
PaF106G0800031555.01	6.22534	5.13836	6.84599	5.93889	7.29077	6.53187	0.134843
PaF106G0500018836.01	0.150002	0.136035	0.45775	0.160366	0.42684	0.32573	0.0758708
PaF106G0500019177.01	0.768835	0.562995	0.382402	0	0	0	0.54888
PaF106G0200008859.01	156.133	169.401	147.526	150.869	127.149	111.728	0.370856
PaF106G0100003355.01	0.039556	0.162503	0	0	0.110581	0.04736	0.0589616
PaF106G0300014217.01	0	0.198013	0	0	0	0	0.170075
PaF106G0600024051.01	0	0	0	0	0	0
PaF106G0100003357.01	3.08945	3.52818	3.02583	4.35744	3.86969	4.2272	0.528894
PaF106G0300012034.01	0	0	0	0	0	0
PaF106G0100005159.01	0.056149	0	0	0	0	0	0.170075
PaF106G0800030458.01	0	0	0.075158	0	0	0	0.170075
PaF106G0100000768.01	0	0	0	0	0	0
PaF106G0400016924.01	0.207969	0	0	0.379954	0.605673	0.543723	0.534947
PaF106G0200008233.01	1.27182	0.961983	0.979233	0.403051	0.257908	0.226803	0.573338
PaF106G0300010899.01	32.0836	27.9662	31.3231	29.8119	30.1179	28.5398	0.116963
PaF106G0700026658.01	0.25846	0.238386	0.31032	0.640853	0.692844	0.482972	0.547374
PaF106G0800030998.01	169.029	139.416	116.455	55.9123	52.8292	53.2646	0.560384
PaF106G0400015638.01	3.0136	4.17019	4.38357	3.2677	3.27408	3.10534	0.267069
PaF106G0600025044.01	0	0.165554	0.112271	0.53786	0.399903	0.353064	0.535328
PaF106G0600024273.01	0.106394	0.147601	0.059283	0.266515	0.102439	0.161285	0.236027
PaF106G0400014643.01	0	0	0	0	0	0
PaF106G0400016344.01	18.3374	21.239	20.5777	32.3202	34.1217	29.3631	0.577461
PaF106G0800031553.01	1.41887	0.673128	1.36092	0.693234	0.400168	0.822814	0.336895
PaF106G0400018140.01	4.67696	4.53543	5.10789	6.37991	7.15664	6.12417	0.546605
PaF106G0600024791.01	191.3	227.383	219.638	236.099	210.47	231.855	0.167653
PaF106G0600025220.01	0	0	0	0	0	0
PaF106G0800032728.01	0	0	0	0	0	0
PaF106G0400016346.01	13.7373	12.9461	16.4098	14.4247	14.9881	13.2723	0.051954
PaF106G0100003962.01	1.11578	1.26222	1.12757	0.436738	0.858612	0.614967	0.518342
PaF106G0100003359.01	308.818	325.096	312.898	356.89	358.201	386.251	0.541243
PaF106G0800032653.01	0	0	0	0	0	0
PaF106G0600024161.01	5.48641	6.68868	7.22253	9.94514	10.371	8.72999	0.533979
PaF106G0800031461.01	2.52104	1.76377	2.78151	1.23575	1.18017	1.44901	0.485665
PaF106G0200009442.01	2.74704	3.17657	2.06482	1.81134	0.835238	1.55629	0.452089
PaF106G0100000866.01	11.5639	10.866	9.05337	9.19182	11.1134	10.09	0.0711621
PaF106G0500021335.01	0.265928	0.550073	0.423635	0.161489	0.579693	0.143781	0.117671
PaF106G0100001615.01	30.5598	30.0638	31.0772	33.6233	37.3904	32.4406	0.42331
PaF106G0300012093.01	0.319975	0.122413	0	0.60644	0.498815	0.393388	0.471449
PaF106G0700027430.01	0	0	0	0	0	0
PaF106G0600022956.01	0.359394	0.141517	0.30206	0.090813	0.14822	0.08706	0.396635
PaF106G0500019736.01	43.0037	42.0007	42.9378	44.5219	40.6572	42.6911	0.050061
PaF106G0300013148.01	0.040412	0.179452	0.114831	0.217428	0.31386	0.194358	0.404217
PaF106G0300014368.01	0.033375	0	0	0	0	0	0.170075
PaF106G0100000048.01	0	0.035295	0.046904	0.064161	0.046303	0.104196	0.351264
PaF106G0400014668.01	0.682503	1.00766	0.741039	0.075352	0.020836	0.054744	0.579529
PaF106G0600022195.01	0.541988	0.281313	0.391811	0.342538	0.409275	0.182199	0.155553
PaF106G0200008609.01	3.02429	2.94992	5.04208	2.67345	3.81191	3.04941	0.10585
PaF106G0100003338.01	1.20626	2.6746	1.94259	0.732895	0.697601	0.578106	0.459076
PaF106G0300010933.01	55.7729	52.9016	55.4771	47.0698	51.0864	48.728	0.511471
PaF106G0600024167.01	31.6619	29.3935	35.3842	37.5045	39.013	41.7369	0.486842
PaF106G0700027033.01	0	0	0	0	0	0
PaF106G0700028253.01	7.50468	7.71347	7.57573	7.21277	8.33548	6.1228	0.0959669
PaF106G0100000864.01	17.6131	19.2236	19.1429	19.7698	18.7742	17.4962	0.0500828
PaF106G0800031467.01	10.2925	9.67502	12.6509	13.6853	13.0093	9.63769	0.132135
PaF106G0400016920.01	36.254	34.7895	36.5637	45.397	42.9962	42.8035	0.582174
PaF106G0300014420.01	0.732371	1.25796	1.31617	1.79696	1.12492	1.32059	0.198932
PaF106G0300010931.01	23.2464	24.6777	24.3156	25.0576	24.0916	25.8171	0.245645
PaF106G0200007774.01	0.255477	0.696442	0.332747	0	0	0	0.471248
PaF106G0700026184.01	479.607	548.35	570.847	936.837	701.537	881.186	0.517272
PaF106G0500019730.01	0.74793	0.590826	0.891508	0.420239	0.75953	0.793906	0.0954625
PaF106G0100006666.01	0.206341	0.07456	0	0.063329	0.058994	0	0.137459
PaF106G0100003960.01	0.035629	0.051406	0.152135	2.06409	1.65499	0.065913	0.343048
PaF106G0300013797.01	18.8187	18.1659	19.8617	12.7973	15.8945	14.0726	0.535513
PaF106G0700027272.01	24.6085	24.4092	26.1251	23.1638	24.8001	21.915	0.315308
PaF106G0800031947.01	2.13293	8.22766	7.16744	13.1981	9.65601	6.77977	0.273785
PaF106G0600022844.01	0	0	0	0	0.017621	0.038039	0.302668
PaF106G0400014982.01	19.7208	22.0765	24.2665	26.1774	21.0203	30.0676	0.224842
PaF106G0200009584.01	0.210909	0.290112	0.258659	0.042801	0.491391	0	0.0808812
PaF106G0300013057.01	11.4626	9.82799	10.8458	16.0247	17.9533	20.1385	0.559997
PaF106G0600023807.01	38.3647	38.944	34.5401	38.3566	34.2257	33.5973	0.156213
PaF106G0700026498.01	0	0	0	0	0	0
PaF106G0100000797.01	6.86349	8.58627	9.54909	8.56131	7.83211	9.69572	0.070264
PaF106G0200009586.01	0.127162	0.170961	0.150123	0	0.017631	0.038332	0.581483
PaF106G0500019333.01	56.2694	64.7447	58.9857	61.9965	55.8061	59.9122	0.0586108
PaF106G0400018312.01	29.8603	28.9458	32.9822	24.4766	22.3257	22.9564	0.553089
PaF106G0800029453.01	52.8599	60.6536	57.6762	50.9039	39.2506	49.0575	0.415031
PaF106G0300014366.01	0	0	0	0	0	0
PaF106G0800030759.01	23.0185	23.101	23.5193	21.6485	22.8416	20.6471	0.392461
Prunus_sibirica_newGene_2030	0.394241	0.089213	0.519727	0.307555	0.479234	0.962339	0.182491
PaF106G0100004129.01	0.093998	0.69393	0.345229	0.468562	0	0.005983	0.158668
PaF106G0600024612.01	2.08104	2.28951	2.44915	1.29106	1.85715	2.07886	0.361329
PaF106G0100006664.01	0.85122	0.632761	0.501512	0.798078	0.600169	0.582846	0.0500203
PaF106G0400016601.01	9.96487	12.4658	14.5052	20.9623	16.4624	16.1074	0.436264
PaF106G0400014984.01	8.99228	9.31136	9.55364	10.6244	10.2864	8.48039	0.122413
PaF106G0100004939.01	0	0	0	0	0.056551	0	0.170075
PaF106G0600022740.01	0.141625	0.544338	0.079529	1.0062	0.205434	0.345772	0.154625
PaF106G0200007542.01	0	0	0	0	0	0
PaF106G0100004581.01	17.5414	18.9301	17.1438	20.363	19.1744	19.1919	0.420352
PaF106G0100006752.01	9.24226	8.86908	9.1698	10.4657	10.8406	8.81912	0.269013
PaF106G0200007776.01	0.282487	0.28591	0.951883	0.526615	0.497504	0.759523	0.0691229
PaF106G0400015149.01	27.2153	24.6089	25.3063	16.7026	19.7074	18.5549	0.568093
PaF106G0700028987.01	0	0	0	0	0	0
PaF106G0700025888.01	0	0	0	0	0	0
PaF106G0700026182.01	27.8076	26.0496	29.2359	30.0944	28.1415	24.7465	0.0500593
PaF106G0800031696.01	5.64321	6.1514	6.15813	6.76945	5.23071	5.51523	0.0618859
PaF106G0600025293.01	4.66146	5.11086	4.59162	6.89431	6.76563	6.99203	0.596953
PaF106G0500018632.01	0.103195	0.165928	0.206893	0.313356	0.189859	0.348592	0.380909
PaF106G0700026302.01	0.468939	0.281759	0.499834	0.643433	0.560264	0.598249	0.420043
PaF106G0400018234.01	58.379	50.4898	67.0665	95.3069	73.5618	91.8984	0.487982
PaF106G0800029451.01	1.23196	1.62643	2.05295	1.85693	2.02251	1.0374	0.0500032
PaF106G0200010091.01	26.7264	27.9841	28.6577	31.6754	29.7715	31.8329	0.507165
PaF106G0400018133.01	26.2338	24.1825	25.9903	10.8142	13.3315	13.5663	0.59666
PaF106G0400018232.01	1.14264	1.42173	1.49746	4.48677	5.50952	4.67688	0.593958
PaF106G0200009360.01	3.43797	2.33668	3.34633	6.47684	6.16368	6.60133	0.588063
PaF106G0100004679.01	16.1124	15.6523	17.4036	18.4135	19.3254	17.0192	0.378758
PaF106G0400018072.01	0.111459	0.050112	0.079589	0.059245	0.128075	0.077349	0.06175
PaF106G0700027270.01	176.533	188.458	160.995	140.359	130.551	143.192	0.524428
PaF106G0300013700.01	22.5233	24.4579	25.4489	28.4033	27.1178	26.289	0.457334
PaF106G0600021986.01	0.118395	0.106898	0.099837	0	0.012403	0	0.601531
PaF106G0500018759.01	25.3628	30.5302	32.5994	35.5964	31.0381	29.5514	0.152586
PaF106G0100004889.01	6.22058	6.46871	7.84429	5.82089	4.9148	5.6652	0.402879
PaF106G0600023031.01	1.78576	2.43465	1.63205	1.40742	2.0231	1.22977	0.20112
PaF106G0700028981.01	0	0	0	0	0	0
PaF106G0100006750.01	6.709	6.02722	6.73879	7.0984	4.17993	5.91241	0.144281
PaF106G0200009072.01	18.9548	19.0642	19.1335	25.1874	24.6901	21.2656	0.506607
PaF106G0600023033.01	23.7494	15.956	19.0188	26.5874	31.3041	30.9153	0.501933
PaF106G0300014396.01	0	0.098368	0	0	0.036339	0	0.097196
PaF106G0500020947.01	4.15703	4.60004	4.78438	5.12997	5.32906	4.86381	0.424064
PaF106G0600024982.01	111.215	121.003	120.841	78.3779	72.7769	74.3725	0.596411
PaF106G0300014211.01	0	0	0.030491	0	0	0.030857	0.0500102
Prunus_sibirica_newGene_1350	7.54869	7.5968	6.62203	5.27475	5.04988	5.17761	0.569782
PaF106G0100002978.01	0	0	0	7.69468	5.26335	6.15999	0.588092
Prunus_sibirica_newGene_1356	0.038795	0.093785	0	0.94945	0.392195	0.494753	0.479512
Prunus_sibirica_newGene_1357	16.9019	17.284	16.6319	15.0296	14.3849	14.2561	0.581712
Prunus_sibirica_newGene_1354	5.74933	6.79934	6.46181	11.8338	10.3372	11.049	0.587788
Prunus_sibirica_newGene_1355	0.723559	0.616195	0.992358	0.898578	0.959067	0.784366	0.139234
Prunus_sibirica_newGene_642	2.0822	1.35254	1.65427	2.57585	2.46854	2.97591	0.504281
PaF106G0600021657.01	2.36849	2.6813	2.8919	2.09275	1.90177	2.11713	0.501016
PaF106G0100005046.01	12.7189	15.4452	14.8611	13.7533	10.8478	11.4794	0.339441
PaF106G0100005957.01	0.655226	0.943672	0.870154	1.03696	0.796607	0.793702	0.0775406
PaF106G0800029533.01	15.223	16.0763	18.7748	21.4533	21.2531	22.0455	0.532107
PaF106G0800031578.01	19.4315	22.862	20.2601	17.7446	21.5579	17.3335	0.202622
PaF106G0300012348.01	3.26585	1.11999	4.0484	10.8995	3.11709	2.66175	0.165535
PaF106G0700026023.01	310.949	297.832	279.481	233.773	221.182	224.884	0.575801
PaF106G0400015739.01	0	0.027538	0	0	0.048626	0.031077	0.175518
PaF106G0600023989.01	8.25164	8.07242	9.52528	8.89191	8.37316	8.68713	0.0507253
PaF106G0800030996.01	114.725	114.246	124.632	94.9351	117.491	116.303	0.17543
PaF106G0700026025.01	15.0302	15.2545	15.8022	14.58	14.2764	13.8027	0.495219
PaF106G0700027250.01	521.304	486.911	445.79	327.742	315.056	331.567	0.576633
PaF106G0500019856.01	43.3468	43.4494	45.0065	53.7783	51.708	50.259	0.574628
PaF106G0400018146.01	0	0.149693	0.097944	0.340826	0.544104	0.474791	0.546376
PaF106G0700026578.01	13.0475	13.6644	15.8321	12.1416	12.371	12.6345	0.366934
PaF106G0400018230.01	106.545	119.744	119.149	51.7812	54.539	58.8782	0.5981
PaF106G0200006789.01	0	0	0	0	0	0
PaF106G0200008728.01	0.11948	0	0	0.032545	0.20546	0.066791	0.157031
PaF106G0100004677.01	58.2035	59.9571	59.6548	53.7025	47.1568	49.9309	0.535209
PaF106G0300011348.01	13.4219	13.1287	15.1852	10.4495	11.3171	11.9967	0.486719
PaF106G0100004306.01	1.06767	1.28028	1.19065	0.18742	0.188269	0.262029	0.600772
PaF106G0800032341.01	1.84893	2.14082	1.87872	1.38092	0.936538	0.768097	0.53402
PaF106G0100006070.01	13.1376	14.2616	14.7819	15.3712	17.3091	13.4358	0.18521
PaF106G0800030811.01	0	0	0	0	0	0
PaF106G0100006485.01	0.031758	0.069818	0.032268	0	0.108539	0.130566	0.137452
PaF106G0100005951.01	4.8735	4.85253	5.05018	7.0748	6.0224	5.41604	0.42058
PaF106G0400016145.01	0	0	0	0	0	0
PaF106G0100004304.01	0	0	0	0	0	0
PaF106G0800030334.01	20.5603	18.8327	22.1084	18.7568	21.2473	19.248	0.101124
PaF106G0100006483.01	302.83	315.398	258.417	316.502	247.294	237.63	0.137209
PaF106G0700027252.01	5.23691	6.99999	7.26824	7.35295	8.316	8.05604	0.354386
PaF106G0800030990.01	0.253979	0.56288	0.352949	0.109345	0.418963	0.129395	0.222409
PaF106G0100004501.01	42.406	49.9789	49.4771	52.9789	47.3408	46.2055	0.0820956
PaF106G0500020945.01	19.3736	18.6022	18.2469	10.5769	9.59484	9.73816	0.604246
PaF106G0100005352.01	8.88072	11.284	10.8176	15.0289	12.513	11.3475	0.353899
PaF106G0700029182.01	0.088142	0.085982	0	0.069535	0	0	0.158046
PaF106G0100005255.01	20.9451	23.5285	25.8698	21.9822	22.8292	22.8651	0.100397
PaF106G0600024984.01	0	0	0	0	0	0
PaF106G0100000377.01	0	0	0	0	0	0
PaF106G0200009364.01	1.19908	0.933376	1.13862	0.948038	1.09088	0.754752	0.22204
PaF106G0100001518.01	605.262	640.657	533.588	607.513	499.467	453.131	0.233334
PaF106G0800029630.01	78.8422	75.8461	78.5464	84.1862	80.0084	76.6438	0.182907
PaF106G0400015910.01	59.3668	70.5221	76.6621	53.7378	49.4547	56.664	0.447784
PaF106G0100001757.01	51.7682	55.7692	50.5734	47.7914	45.7911	43.7826	0.495019
PaF106G0100000375.01	0	0	0	0	0	0
PaF106G0600023273.01	0	0	0	0	0	0
PaF106G0800030841.01	1.69356	1.40425	1.53924	1.80068	3.26243	2.49518	0.388133
PaF106G0800029636.01	0	0	0	0.275899	0	0	0.170075
PaF106G0300012260.01	3.46073	3.44741	3.42682	6.38805	6.98349	5.94597	0.591865
PaF106G0300013623.01	0	0	0	0	0	0
PaF106G0100003491.01	15.6707	16.4212	18.1088	20.8756	20.0717	21.2619	0.546116
PaF106G0700026027.01	47.7346	48.4026	47.1652	51.3763	45.8222	49.4868	0.110416
PaF106G0100004948.01	20.6539	18.1613	19.2309	17.6848	19.636	19.0673	0.0980185
PaF106G0100003746.01	12.7901	11.0051	13.7126	13.2876	12.7571	12.7066	0.0853618
PaF106G0700028587.01	0	0	0	0	0	0
PaF106G0500021012.01	0.819175	0.638882	0.931624	0.195619	0.464411	0.208476	0.521707
PaF106G0100003436.01	0	0.138814	0	0	0	0	0.170075
PaF106G0600025874.01	55.3935	49.7532	55.2559	71.3179	74.1312	75.3371	0.588726
PaF106G0800031897.01	2.63537	3.28595	3.66427	6.40825	5.47969	8.83004	0.495771
PaF106G0300011541.01	23.0698	25.1108	24.0414	28.5372	24.8571	23.1906	0.143544
PaF106G0500019382.01	19.1801	17.4263	19.3908	19.6187	22.6183	20.0948	0.335283
PaF106G0600024429.01	78.3828	80.3201	80.1565	79.0763	77.0392	82.213	0.0516907
PaF106G0500018819.01	0.091841	0.021865	0.019679	0.037032	0.054829	0.03644	0.0506871
PaF106G0700028589.01	0.03225	0.111317	0.000972	0.032186	0.080808	0	0.0596063
PaF106G0100003744.01	0.29946	0.174171	0.297005	0.291431	0.186927	0.099102	0.156264
PaF106G0300014072.01	15.1105	13.9535	13.0605	8.63363	7.49394	7.43561	0.586859
PaF106G0100001755.01	0	0	0	0	0	0
PaF106G0700026973.01	0	0	0	0	0	0
PaF106G0500020206.01	0	0.020313	0.027303	0.483786	0.108956	0.225582	0.394326
PaF106G0100006286.01	3.06274	5.07735	4.68234	2.12042	3.56596	6.06305	0.0606055
PaF106G0100006481.01	0.372754	0.108029	0.185058	0.490369	0.766801	0.998101	0.473444
PaF106G0800030992.01	0	0	0	0	0	0
PaF106G0300011894.01	0.178821	0.155352	0.303852	0.149889	0.248894	0.119946	0.107693
PaF106G0400017661.01	30.6297	29.3258	29.6552	24.8394	24.8637	25.8128	0.589411
PaF106G0700029242.01	0	0.051317	0	0.038394	0.107331	0.158566	0.376762
PaF106G0100006229.01	2.3016	1.73364	2.76182	2.18197	2.15218	1.72756	0.121174
PaF106G0600022403.01	0.808566	0	0.846606	0.634715	0.477831	0.733024	0.0569989
PaF106G0500018531.01	33.2762	31.917	34.8566	46.0234	52.2818	45.4535	0.566895
PaF106G0300014360.01	0.019175	0	0	0	0	0.043294	0.0855581
PaF106G0400017227.01	0.653214	0.868593	1.06547	1.11373	1.32297	0.75451	0.167221
PaF106G0600024427.01	12.5769	13.4981	12.1089	16.7734	13.3625	13.549	0.278692
PaF106G0800029634.01	0	0	0	1.05742	0.742479	0.714069	0.580367
PaF106G0400017300.01	0.059716	0.128473	0.012298	0	0	0	0.349897
PaF106G0300013621.01	43.1389	51.2226	43.8125	21.3434	18.6318	28.6907	0.561819
PaF106G0100004441.01	60.1732	56.9523	60.084	53.1357	49.7939	47.4904	0.535485
PaF106G0200007110.01	0.39213	0	0.086975	0.082402	0.211926	0.13442	0.0525865
PaF106G0100003229.01	14.9516	13.7912	11.0493	17.5937	14.3606	15.2	0.291819
PaF106G0800032249.01	0	0	0	0	0	0
PaF106G0500020190.01	54.0842	53.7601	51.6055	39.9054	39.1755	36.1198	0.593716
PaF106G0200010611.01	0.394204	0.219812	0.069715	0.311622	0.111538	0.037066	0.0982022
PaF106G0300011889.01	1.93423	3.97624	3.09728	2.80309	3.15079	2.79363	0.0529539
PaF106G0300011208.01	3.46912	3.94459	3.85351	6.23146	4.89024	5.5892	0.529725
PaF106G0200007112.01	0.03375	0.061061	0.025442	0	0	0	0.504103
PaF106G0400016269.01	3.93373	3.52414	5.29669	2.05865	2.23504	2.5856	0.493283
PaF106G0100000474.01	1.14738	1.80623	1.53001	0.943562	0.792146	2.58664	0.0511271
PaF106G0600023353.01	102.756	110.114	89.3179	106.467	87.9863	87.4269	0.127556
PaF106G0100001774.01	111.89	123.222	135.479	130.738	133.56	129.397	0.192539
PaF106G0100003602.01	0	0	0	0.005101	0	0.002173	0.294343
PaF106G0500018845.01	0.624035	0.41769	0.539427	0.883865	0.453959	0.783943	0.222016
PaF106G0500020200.01	0	0	0	0	0	0
PaF106G0300014070.01	13.4478	12.933	14.3665	12.0608	11.8772	12.0211	0.506338
PaF106G0300013627.01	0	0	0	0	0	0
PaF106G0400014760.01	2.3474	3.39964	3.64722	3.40664	3.28439	4.3533	0.180577
PaF106G0400017351.01	58.4151	55.8983	58.7993	104.155	99.8942	109.543	0.602091
PaF106G0700028132.01	14.8002	13.6199	16.5134	17.5599	17.1186	16.7604	0.414256
PaF106G0700029165.01	0	0	0	0	0	0
PaF106G0400015119.01	0	0	0	0	0	0
PaF106G0100005132.01	0.026305	0.092874	0.032125	0	0	0.149639	0.050015
PaF106G0100001686.01	129.617	132.091	124.157	119.775	111.848	108.491	0.504485
PaF106G0100005477.01	14.8071	13.0905	15.6589	18.2489	21.8768	19.5254	0.520447
PaF106G0800032439.01	29.0134	31.1622	32.2177	33.3092	35.592	30.0839	0.206909
PaF106G0100003225.01	116.445	115.197	116.92	124.473	128.195	126.025	0.585254
PaF106G0400015655.01	0	0	0	0	0	0
PaF106G0200010617.01	51.4395	44.1862	52.7997	72.4857	76.6776	75.5711	0.586365
PaF106G0700028004.01	0	0	0	0	0	0
PaF106G0600022627.01	0	0	0	0	0	0
PaF106G0500020202.01	3.3582	4.00588	3.92453	2.41407	2.67645	2.34018	0.558741
PaF106G0100003336.01	0	0	0	0.004604	0	0	0.170075
PaF106G0100005040.01	15.1707	15.3133	14.319	13.6272	15.4031	13.6469	0.182917
Prunus_sibirica_newGene_82	0.345807	0.169341	0.347587	0.200533	0.150318	0.227725	0.267893
Prunus_sibirica_newGene_81	0.40859	0.390089	0.30235	0.274252	0.347249	0.309608	0.259918
PaF106G0600025213.01	266.991	266.789	284.808	261.351	265.696	282.394	0.0669897
PaF106G0600021659.01	12.0494	13.4998	14.5542	11.3816	9.65357	11.2794	0.446986
Prunus_sibirica_newGene_89	0.6544	0.780344	0.993602	1.96108	1.75758	0.917847	0.38043
Prunus_sibirica_newGene_88	0	0	0	0	0.315005	0.100984	0.267378
PaF106G0100005331.01	10.8576	10.7924	10.6808	9.96897	10.9538	9.31595	0.260412
PaF106G0100004163.01	5.30546	5.33592	4.29777	6.18539	6.27042	6.07615	0.4907
Prunus_sibirica_newGene_1453	4.1339	3.43116	2.39584	2.6445	2.71675	2.44304	0.250692
PaF106G0700028134.01	0	0	0	0.107537	0.090953	0.07117	0.586047
PaF106G0800030120.01	0.128755	0.106091	0	0.071089	0.272946	0.218232	0.270982
PaF106G0100002433.01	0	0	0	0	0	0
PaF106G0800030656.01	15.8795	15.621	15.7403	10.5045	8.48919	7.02541	0.575346
PaF106G0600023355.01	0	0	0	0	0	0
PaF106G0100003600.01	4.58837	5.6973	5.36768	4.26207	4.88564	4.36467	0.333113
PaF106G0400017700.01	0.039155	0	0	0	0	0	0.170075
PaF106G0400017223.01	0.828673	1.31639	1.54851	0.9658	0.839618	0.594275	0.322899
PaF106G0700028006.01	0	0	0	0	0	0
PaF106G0100003606.01	0.049635	0	0	0	0	0	0.170075
PaF106G0300013346.01	0	0	0	0	0	0
PaF106G0100004671.01	8.0599	8.65984	9.79148	9.20658	10.5932	9.35986	0.233052
PaF106G0800030419.01	0.807752	0.378211	0.327403	0.58883	0.102871	0.180057	0.169632
PaF106G0600025211.01	3.12827	2.27413	2.14479	8.57103	7.38963	7.52074	0.594758
PaF106G0100005333.01	11.2701	11.5113	13.5508	11.2585	13.8087	11.5961	0.0514973
PaF106G0700029167.01	5.28372	4.39932	4.79374	3.83985	4.55335	5.60075	0.0611975
PaF106G0300013395.01	4.86509	8.05557	7.14744	6.53183	6.48587	7.98735	0.0620407
PaF106G0300011239.01	1.6378	1.28585	1.39603	3.46379	4.29888	3.4592	0.581123
PaF106G0100005130.01	0	0	0.054108	0	0	0	0.170075
PaF106G0700026735.01	42.5222	62.8478	57.675	33.0473	49.1807	43.4118	0.290098
PaF106G0600025183.01	0	0	0	0	0	0
PaF106G0200010615.01	1.5405	1.5977	1.84316	2.85807	3.99136	3.76263	0.551375
PaF106G0200008662.01	0.929282	0.74445	0.397934	0.53725	0.906608	0.559958	0.0518965
PaF106G0300011075.01	7.04029	6.62476	8.45209	7.71493	7.60715	8.9145	0.173686
PaF106G0500020365.01	0	0	0	0	0	0
PaF106G0300011701.01	0	0	0	0	0	0
PaF106G0700027526.01	16.9673	23.2485	21.3815	23.0466	25.8232	17.1749	0.0804246
PaF106G0100002431.01	18.6662	22.3648	19.6567	21.8783	19.5438	19.4728	0.0503692
PaF106G0100005354.01	0.03549	0	0	0	0	0	0.170075
PaF106G0200008660.01	0.058063	0	0.090103	0.208081	0.085977	0.080813	0.275108
PaF106G0700029184.01	0.756999	0	0.981142	0.266965	0.297282	0.873999	0.0611124
PaF106G0300011077.01	7.50721	8.18687	8.17424	9.17234	8.25987	8.23283	0.281425
PaF106G0600021836.01	13.3092	13.9249	18.5632	19.3975	19.8263	17.2967	0.345141
PaF106G0400014802.01	8.29387	9.95315	8.54429	15.4348	15.0499	14.51	0.593328
PaF106G0500021176.01	0.384013	0.290333	0.420566	0.072838	0	0.076397	0.573894
PaF106G0100003518.01	12.971	14.6405	15.7758	15.7662	13.3967	11.8006	0.0944041
PaF106G0800030762.01	26.9622	33.2641	32.6725	31.2158	28.0487	32.2784	0.0551462
PaF106G0500021210.01	0	0	0	0	0	0
PaF106G0700028136.01	4.51885	4.81953	5.03937	2.57412	4.07877	4.8286	0.253473
PaF106G0800030045.01	0.39859	2.13171	0.222861	1.03611	1.61753	0.894233	0.0732668
PaF106G0100004161.01	0.301502	0.147678	0.245039	0.397098	0.304891	0.354078	0.393841
PaF106G0700029170.01	1.14026	2.63476	1.93501	1.57663	1.29413	0.913459	0.241501
PaF106G0100005136.01	6.84121	6.64773	6.32582	6.59354	6.83082	5.68547	0.101278
PaF106G0800030122.01	3.16985	3.07607	3.08212	4.55471	6.19307	4.12673	0.455248
PaF106G0100001898.01	0	0	0	0	0	0
PaF106G0800030124.01	0.44478	0.883713	0.473179	3.35899	1.86039	1.51069	0.445228
PaF106G0500021300.01	1.24756	1.46649	1.07926	2.30038	1.89467	1.37948	0.360371
PaF106G0800030591.01	0.018602	0	0	0.037529	0.032287	0	0.227271
PaF106G0200009091.01	0	0	0	0	0	0
PaF106G0800031070.01	0	0	0	0	0	0
PaF106G0400015590.01	42.5458	41.3139	51.9598	67.5709	69.3339	65.766	0.56847
PaF106G0600025373.01	57.587	57.748	53.0246	34.6908	43.1806	38.1831	0.564003
PaF106G0600022496.01	0	0	0	0.820984	0.772121	0.253484	0.486457
PaF106G0700027143.01	1.87021	2.8574	2.3211	1.64629	1.92144	1.5433	0.367502
PaF106G0200008478.01	0	0	0	0.489201	1.81969	0.559056	0.38163
PaF106G0200008012.01	54.5717	57.8972	64.777	67.4561	58.2833	60.0766	0.113587
PaF106G0100002513.01	0	0	0	0	0	0
PaF106G0200010779.01	0	0	0	0.063964	0.139764	0	0.301464
PaF106G0500018755.01	0	0	0	0.101456	0	0.026457	0.250217
PaF106G0300011756.01	6.1835	5.47062	5.52968	6.23674	7.90801	6.67445	0.380587
PaF106G0300011149.01	36.0724	33.8251	35.8953	33.6721	35.8265	32.4197	0.180181
PaF106G0500020429.01	55.4251	67.7479	67.6871	64.7863	68.9902	63.039	0.077419
PaF106G0100000641.01	814.514	903.435	715.147	629.628	598.663	599.023	0.500386
PaF106G0700026464.01	3.61893	2.85528	3.27722	4.16225	4.46408	4.36094	0.534228
PaF106G0200009669.01	7.08766	6.91566	8.68005	6.6727	6.49825	7.79193	0.137097
PaF106G0300012124.01	22.1331	23.3639	23.9551	26.1018	23.1948	24.8944	0.283543
PaF106G0600021834.01	67.2737	73.1618	80.7843	17.5455	18.1678	17.3721	0.600483
PaF106G0400017449.01	14.763	12.8351	13.9325	12.2304	15.1658	13.0925	0.0658341
PaF106G0500020127.01	77.0261	73.4306	81.4092	87.8127	83.4418	88.3406	0.482519
PaF106G0800031051.01	13.0405	16.0652	15.9831	7.99616	7.40191	7.47337	0.578086
PaF106G0500021170.01	8.87123	8.36477	9.1519	9.33631	9.28141	8.26346	0.0715918
PaF106G0100003893.01	0	0	0	0	0	0
PaF106G0100004261.01	0.132579	0.240188	0.378007	0.215874	0.192325	0.10633	0.170845
PaF106G0600022848.01	0	0	0.051668	0.227298	0.243256	0.188334	0.585953
PaF106G0600022490.01	2.35128	3.50129	3.70659	5.77322	4.01527	3.18044	0.230434
PaF106G0500019716.01	0	0	0	0.044671	0	0	0.170075
PaF106G0400017008.01	5.30182	6.67901	9.06396	14.6334	12.4108	14.3774	0.550752
PaF106G0100004263.01	140.695	141.674	127.99	228.154	183.467	211.535	0.549606
PaF106G0400016294.01	0	0.079046	0	0.046172	0	0	0.0680743
PaF106G0700027382.01	0.133226	0.212568	0.187744	0.17284	0.043917	0.043032	0.331127
PaF106G0800032116.01	0	0.08028	0.259734	0.219326	0.297089	0.168422	0.239012
PaF106G0200010393.01	39.6058	43.303	46.246	101.714	85.2984	85.325	0.584335
PaF106G0600022702.01	22.4131	19.4621	21.8652	29.7822	29.915	28.5975	0.584119
PaF106G0600025375.01	2.04299	2.1488	1.85367	4.18634	3.89066	4.18176	0.602031
PaF106G0500018732.01	98.8891	100.644	99.3773	109.151	107.241	109.603	0.592368
PaF106G0800031072.01	5.29652	5.17784	4.35964	4.38253	4.692	4.8027	0.169267
PaF106G0200008386.01	0	0.270973	0.073768	0.563111	0.423208	1.07358	0.43315
PaF106G0300013164.01	12.63	14.8433	19.2076	15.1295	18.5471	22.3435	0.18909
PaF106G0100000272.01	0	0.070408	0.071656	0	0	0.057765	0.154595
PaF106G0100002210.01	16.9557	20.1777	16.0031	21.2986	22.9099	23.864	0.486506
PaF106G0500020121.01	0.359991	0.35987	0	0.26362	0.221554	0.387775	0.0715231
PaF106G0800032309.01	0	0	0	0.113128	0	0	0.170075
PaF106G0300012327.01	0.858269	0.899087	1.09002	0	0	0	0.599185
PaF106G0200009723.01	14.3535	17.081	17.2882	17.2519	16.3953	16.6367	0.0885414
PaF106G0200008388.01	38.4611	38.0034	46.1597	54.4229	59.0747	53.4731	0.538235
PaF106G0100002216.01	30.179	29.6021	30.7222	29.624	30.3315	28.5294	0.188443
PaF106G0600023279.01	0	0	0	0	0	0
PaF106G0100003023.01	4.04889	4.43512	4.91531	5.05404	4.54561	5.94293	0.267005
PaF106G0700026515.01	0.059721	0	0.083582	0	0	0.039861	0.214718
PaF106G0100000270.01	13.3788	16.3143	15.9337	31.6157	27.4378	28.4536	0.587978
PaF106G0400018193.01	0.779634	0.998312	0.824042	4.37982	3.53702	3.04577	0.575856
PaF106G0300013361.01	0	0	0	0	0	0
PaF106G0100002496.01	2.25062	0.874653	1.48794	2.82852	2.7862	3.81307	0.466588
PaF106G0400015510.01	0	0	0	0	0	0.035965	0.170075
PaF106G0100000647.01	0	0.076492	0	0.032761	0	0	0.08774
PaF106G0700026466.01	0	0	0.114994	0	0	0	0.170075
PaF106G0400015006.01	0	0	0	0	0	0
PaF106G0200008694.01	14.4047	13.8634	14.3519	19.544	17.1525	17.7977	0.554222
PaF106G0600023546.01	0	0	0	0	0	0
PaF106G0300011054.01	43.9222	45.3403	45.7999	37.6032	40.1482	37.4195	0.568471
PaF106G0300012122.01	3.78782	4.70182	5.37688	3.06811	3.95163	3.31558	0.382681
PaF106G0700028489.01	0	0	0	0	0	0
PaF106G0500019363.01	0.388889	0.24052	0.216303	8.27301	9.85745	7.54482	0.597214
PaF106G0600024721.01	2.01863	2.27031	1.92165	1.99074	1.78612	1.45694	0.311747
PaF106G0600022704.01	0.078605	0.010076	0.012188	0	0	0.065704	0.0694981
PaF106G0800032114.01	0	0	0	0.21074	0	0	0.170075
PaF106G0600024988.01	181.039	169.596	182.353	96.0727	113.56	111.813	0.592799
PaF106G0200008485.01	0	0	0	0	0	0
PaF106G0700026752.01	7.37916	6.9277	8.37319	8.16373	7.71423	7.80439	0.122173
PaF106G0800030542.01	0.286127	0.961869	1.04801	0.902423	0.302732	0.832264	0.0611873
PaF106G0500019361.01	0	0	0	0	0	0
PaF106G0100006136.01	17.2199	16.7147	18.7601	19.7955	18.6255	16.7898	0.129138
PaF106G0100003330.01	8.80906	8.25078	6.79789	8.63821	9.57846	6.54459	0.0610228
PaF106G0100003021.01	10.0664	9.64661	10.8663	11.6335	9.62029	10.4825	0.0931102
PaF106G0200009725.01	4.56207	6.75042	6.35962	7.88488	6.53842	6.56995	0.244181
PaF106G0700027380.01	0	0	0	2.29862	1.4042	1.80448	0.576256
PaF106G0800030785.01	1.64683	1.38831	1.60721	0.086225	0	0	0.603394
PaF106G0800029829.01	2.09632	1.70029	1.65105	1.25782	0.90042	1.10622	0.522119
PaF106G0200009078.01	2.45217	2.5723	2.2065	1.89332	2.17801	2.16608	0.396108
PaF106G0300014551.01	4.24287	5.16719	5.07656	3.85325	3.77338	4.5454	0.354787
PaF106G0100001464.01	14.345	29.5299	15.0453	33.7161	32.8413	29.7411	0.409582
PaF106G0600023975.01	0	0	0	0	0	0
PaF106G0100001809.01	21.6856	23.8659	26.6241	23.7755	20.4889	18.8158	0.265983
PaF106G0200008692.01	0	0	0	0	0	0
PaF106G0800030650.01	18.4904	17.7258	19.3879	24.0968	26.6865	26.3455	0.580267
PaF106G0300014553.01	2.67409	4.80959	5.07801	5.38249	5.71437	2.14638	0.0539269
PaF106G0200009634.01	0	0.052348	0.015342	0	0	0	0.259626
PaF106G0500019067.01	4.6692	5.6874	4.71998	41.7632	28.4614	54.5919	0.542591
PaF106G0800030701.01	1.84657	1.39199	1.78703	0.308253	0.028372	0.400433	0.582201
PaF106G0700026681.01	0	0	0	0	0	0
PaF106G0800031352.01	0	0	0	0	0	0
PaF106G0800029423.01	77.3772	74.6739	74.3399	65.0247	66.8795	61.9026	0.567234
PaF106G0100005299.01	25.4042	27.6533	23.8046	32.857	31.4015	30.2477	0.529061
PaF106G0500019559.01	6.09009	5.23274	6.11957	4.04622	5.1436	3.73671	0.453792
PaF106G0700026750.01	14.9656	12.9262	15.4159	13.8249	13.8678	13.8624	0.125264
PaF106G0500019775.01	0.038548	0.115611	0.343606	0.281503	0.546803	0.214921	0.236088
PaF106G0100002214.01	1.12659	1.2077	1.42664	2.02145	2.41769	1.49997	0.424587
PaF106G0700027362.01	270.419	336.184	339.647	378.849	324.176	332.477	0.180813
PaF106G0700026517.01	0.101596	0.097188	0.26925	0	0	0	0.440268
PaF106G0400015215.01	0	0	0	0.032956	0.110867	0.10929	0.479881
PaF106G0600024927.01	0	0	0	0	0	0.107329	0.170075
PaF106G0400015512.01	0	0	0	0	0	0
PaF106G0500019082.01	38.9268	35.0132	35.1539	39.3583	40.1601	37.1823	0.291599
PaF106G0700026733.01	0.839541	1.66521	1.37527	3.20659	4.48369	2.11811	0.437603
PaF106G0400015514.01	4.6312	5.48504	6.05861	5.3917	5.01237	5.22593	0.0749058
PaF106G0500019080.01	0.129538	0.779593	0.208914	0.794179	0.801324	0.507424	0.259124
PaF106G0600024925.01	8.9794	7.60549	9.82425	9.43907	8.68746	9.56322	0.099697
PaF106G0800032215.01	5.29878	4.96699	5.75282	5.67818	5.91932	4.9041	0.0747354
PaF106G0600025185.01	0	0	0.052974	0	0	0	0.170075
PaF106G0600025872.01	0.830413	1.47162	1.02405	0.543829	0.376391	0.378453	0.487983
PaF106G0100006227.01	2.67508	3.13874	3.64433	4.82778	4.58611	4.74569	0.554979
PaF106G0600024795.01	0.081427	0.060485	0.284991	0	0.385959	0.404489	0.13337
PaF106G0300011543.01	19.1771	18.0316	18.0641	13.4389	19.3568	17.6963	0.147637
PaF106G0200010667.01	77.729	82.3119	82.8479	82.9691	73.0923	72.5475	0.223484
PaF106G0100000859.01	5.95727	5.75507	5.36998	9.19422	11.3499	9.9116	0.573377
PaF106G0500019061.01	0.17582	0.509086	0.277892	0.786155	0.447461	0.31982	0.200927
PaF106G0800030703.01	2.45794	3.89331	3.38995	2.93917	3.33133	1.84729	0.147757
PaF106G0200007635.01	0.023973	0	0.015771	0.352633	0.12446	0.178415	0.457837
PaF106G0100006134.01	4.42054	4.68646	5.75693	4.30507	4.42837	4.26683	0.270591
PaF106G0800030540.01	1.94116	1.30062	1.57455	2.02253	2.64517	2.16319	0.419468
PaF106G0300013899.01	11.0016	8.07663	7.36574	6.157	8.52925	9.26905	0.0940032
PaF106G0600025052.01	0	0	0.018884	0	0	0.114993	0.136494
PaF106G0200009727.01	2.95302	2.07427	3.38651	2.57229	2.94032	3.02542	0.0514563
PaF106G0200008820.01	32.7429	31.1773	36.3755	26.0097	28.723	24.3873	0.494948
PaF106G0600021499.01	0	0	0	0	0.744596	0	0.170075
PaF106G0700026511.01	1.00188	1.07846	0.951768	3.86089	4.0529	3.00957	0.583842
PaF106G0800030764.01	9.64375	10.293	10.3397	11.0371	10.0728	10.2283	0.159592
PaF106G0200008822.01	0	0	0	0	0.016225	0.047947	0.272256
PaF106G0600025010.01	0	0	0	0	0	0
PaF106G0100000157.01	1.09267	0.91093	1.2191	0.045753	0.047465	0.068715	0.595737
PaF106G0100005325.01	10.0483	10.235	10.4851	13.6112	11.5916	15.9313	0.439124
PaF106G0500021216.01	12.1547	11.8912	13.6445	14.7785	14.8594	13.3352	0.403232
PaF106G0800029599.01	1.79247	1.57043	0.860684	1.64337	1.94491	1.93574	0.260145
Prunus_sibirica_newGene_1622	8.72577	7.06733	8.33207	9.97892	12.2679	9.53225	0.424979
Prunus_sibirica_newGene_1623	0.189186	0.240502	0.175091	0.930085	0.777225	0.635107	0.571688
Prunus_sibirica_newGene_1621	1.21832	1.29475	1.68169	6.13437	4.29708	5.84365	0.573977
Prunus_sibirica_newGene_1626	4.25096	5.34373	5.90956	4.62956	5.22074	4.23993	0.138484
Prunus_sibirica_newGene_1627	0.378675	0.278866	0.084659	0.402538	0.570238	0.284854	0.25659
PaF106G0300013278.01	0	0	0	0	0	0
PaF106G0300013473.01	0	0	0	0	0	0
PaF106G0700026683.01	19.9874	19.3743	18.2933	16.2828	16.773	15.7055	0.548073
PaF106G0800030961.01	42.1999	45.1577	45.8077	43.7946	44.1972	41.7796	0.140273
PaF106G0500021345.01	0	0	0	0	0	0
PaF106G0200008481.01	0.523309	0	0.145428	0.293117	0.199071	0.240272	0.0525701
PaF106G0800030546.01	0	0.319625	0.544758	0.265353	0.282217	0.154909	0.0654125
PaF106G0100003528.01	0	0.045038	0	0	0	0	0.170075
PaF106G0800032272.01	0.035328	0.087274	0	0	0	0	0.289309
PaF106G0800032335.01	0	0	0	0	0	0
PaF106G0800031508.01	0	0	0	0	0	0
PaF106G0200007637.01	3.30555	4.07043	3.44054	3.21474	3.69161	2.51454	0.194078
PaF106G0100001248.01	0.097312	0.062077	0.054228	0	0.021726	0.07445	0.272228
PaF106G0100003526.01	0.025174	0	0.034387	0.011437	0	0.018555	0.140964
PaF106G0800032333.01	2.85861	3.82742	2.98188	6.11549	4.45851	5.2499	0.498853
PaF106G0600025219.01	0	0	0	0.029026	0	0	0.170075
PaF106G0200010330.01	0.850209	1.05866	0.50958	0.964669	1.1067	1.35042	0.306283
PaF106G0800032034.01	0	0	0	0	0	0
PaF106G0500020990.01	25.024	23.1953	26.7206	24.6327	24.4285	26.3209	0.0522239
PaF106G0400017619.01	752.237	757.438	650.1	505.389	466.189	472.18	0.569777
PaF106G0100006225.01	0.158136	0.169793	0.35452	0.801643	1.13926	1.08131	0.569064
PaF106G0800031135.01	0	0.05869	0	0.280894	0	0	0.127358
PaF106G0600024797.01	10.108	10.3434	10.5312	7.41479	9.39059	8.37373	0.482005
PaF106G0500019063.01	9.04209	10.0773	10.3154	9.3453	8.12183	8.25275	0.386409
PaF106G0700026685.01	39.5639	39.4767	40.201	40.2361	41.9146	40.244	0.312048
PaF106G0100006269.01	5.07	5.34275	5.69125	10.3784	10.0505	8.95118	0.590115
PaF106G0300013236.01	0	0	0	0	0	0
PaF106G0200006847.01	0	0	0	0	0	0
PaF106G0200006761.01	3.5507	2.7309	2.819	2.88393	3.04766	2.86974	0.0696687
PaF106G0400017447.01	6.24256	5.83968	7.29613	6.91342	8.02117	6.78537	0.236654
PaF106G0500019504.01	0	0	0	0	0	0
PaF106G0500019992.01	40.3887	36.9114	41.2905	41.4162	45.7266	43.7101	0.38516
PaF106G0300011376.01	1.63257	1.46532	1.64914	0.58557	0.855948	1.11568	0.531847
PaF106G0500019676.01	73.2704	75.752	88.3697	89.7002	87.5348	90.1759	0.368041
PaF106G0300014351.01	18.9271	19.0902	19.8981	24.6913	23.6166	24.4026	0.595393
PaF106G0200010332.01	4.05438	0.193219	1.14462	5.4495	0.228377	5.26054	0.149565
PaF106G0400018137.01	0	0	0	0	0	0
PaF106G0100002086.01	2.42768	2.1222	2.40004	2.38641	3.11667	2.63225	0.30069
PaF106G0400016564.01	0	0	0	0	0	0
PaF106G0100006223.01	55.0128	52.0293	51.7541	49.009	50.014	48.5812	0.481763
PaF106G0100003545.01	1.62177	1.19469	1.87876	4.80839	5.11135	5.38802	0.599593
PaF106G0200007751.01	0	0	0	0	0	0
PaF106G0600025515.01	0	0	0	0	0	0
PaF106G0200010395.01	0.167191	0.173593	0.040799	1.53577	1.63577	0.989459	0.565896
PaF106G0400016566.01	1.05041	1.26779	1.09912	0.212353	0.38621	0.683448	0.538017
PaF106G0600021765.01	210.382	202.095	201.244	200.71	200.786	218.367	0.0637401
PaF106G0200007330.01	0.381491	0.068885	0.088824	0.110699	0.50338	0.414674	0.17916
PaF106G0600022124.01	0	0.137493	0	0	0	0	0.170075
PaF106G0400015172.01	6.48382	6.25477	6.37474	4.38033	4.33816	3.72797	0.592206
PaF106G0600025517.01	0	0	0	0	0	0
PaF106G0300013573.01	11.1655	9.86756	11.0003	15.7989	14.5981	14.7357	0.581888
PaF106G0800032576.01	5.77375	3.25958	5.69557	1.1453	0.850635	0.843802	0.540651
PaF106G0400017441.01	0	0	0	0	0	0
PaF106G0800032331.01	65.392	63.6045	57.3347	49.4398	48.4498	47.7671	0.555266
PaF106G0300011556.01	15.7928	16.5591	16.4827	14.9237	15.2898	14.1603	0.498216
PaF106G0200006897.01	0	0	0	0	0	0
PaF106G0600022688.01	14.0511	16.4247	17.5622	10.6161	9.75913	9.67769	0.557434
PaF106G0400015000.01	0	0	0	0	0	0
PaF106G0400017248.01	2.22444	2.48823	2.80991	4.37035	3.95764	4.32116	0.582944
PaF106G0300013287.01	45.994	49.4587	48.0968	57.4449	52.9953	49.6892	0.385819
PaF106G0100000188.01	5.38363	7.05893	6.93204	5.82359	5.89777	4.6647	0.266027
PaF106G0600023391.01	7.90204	5.14471	5.73506	4.30802	4.08499	2.97493	0.430145
PaF106G0600022126.01	0.047424	0	0.02914	0.028906	0	0	0.158997
PaF106G0100006571.01	0.805381	1.24792	0.352646	2.81527	2.4122	2.18892	0.552012
PaF106G0600021763.01	5.23887	3.93725	4.49675	3.17523	4.96751	4.09198	0.122848
PaF106G0100006451.01	165.113	183.745	175.248	95.1703	106.451	121.693	0.576564
PaF106G0500019651.01	1.20369	1.80901	1.42991	2.56695	0.780275	1.028	0.0502103
PaF106G0100006399.01	0.357829	0	0.267638	1.09976	0.875309	0.851301	0.556244
PaF106G0300013932.01	19.5552	19.4806	19.4912	18.8296	15.8773	16.108	0.436294
PaF106G0500020479.01	4.80945	5.03276	5.35588	2.45937	3.30448	3.61361	0.548695
PaF106G0200007456.01	1.82653	2.57991	2.39494	8.44924	7.62568	7.12408	0.597433
PaF106G0500020866.01	0.084825	0.208956	0.228473	1.01081	0.826172	0.794569	0.586665
PaF106G0600022189.01	0	0	0	0	0	0
PaF106G0100004620.01	0	0	0	0.02218	0	0.021136	0.352353
PaF106G0400016678.01	0.573424	0.315528	0.497672	0	0	0.089183	0.55194
PaF106G0500020477.01	2.33527	1.46911	1.77298	1.50306	1.87845	1.90103	0.0667328
PaF106G0200007450.01	2.14703	2.06632	1.51951	0.879382	0.389649	0.958682	0.530194
PaF106G0100004940.01	16.1061	15.5362	18.4778	17.1389	15.3445	13.641	0.166981
PaF106G0300013930.01	5.089	3.60451	4.39751	6.20875	7.56448	5.56351	0.44896
PaF106G0200010434.01	12.3906	12.3466	14.7069	14.4546	13.2385	12.7501	0.0679817
PaF106G0200008126.01	7.20382	13.0797	10.4637	18.0126	19.0373	21.5188	0.537627
PaF106G0100004876.01	13.7561	18.8849	16.269	17.2767	18.5748	18.8588	0.218138
PaF106G0500021158.01	5.9759	3.78785	6.17788	7.27355	9.01378	8.24379	0.469585
PaF106G0400017443.01	32.9828	32.5895	34.6834	33.8443	37.0734	33.2051	0.160021
PaF106G0100000481.01	97.2429	103.241	103.004	72.7844	80.3308	86.6577	0.540407
PaF106G0600022872.01	0	0	0	0.489823	0.372278	0.456858	0.598057
PaF106G0400018269.01	21.4846	21.1023	20.7306	24.1731	22.3967	19.2248	0.0931751
PaF106G0100004622.01	95.0833	97.7822	95.1462	104.624	104.257	103.596	0.586727
PaF106G0800030089.01	19.0189	17.624	18.0349	16.6813	17.5333	16.2793	0.416822
PaF106G0400016241.01	0	0	0	0	0	0
PaF106G0600023640.01	19.2528	19.0262	23.5078	19.9297	21.884	23.0417	0.0978114
PaF106G0500021119.01	20.1081	20.2996	14.4861	14.0135	10.5178	14.8185	0.384558
PaF106G0300010981.01	2.39319	1.55126	2.49874	3.29393	2.8904	2.93147	0.438245
PaF106G0700028145.01	0	0	0	0	0	0
PaF106G0600021461.01	0	0	0	0	0	0
PaF106G0100001140.01	5.49938	5.947	6.79154	7.92552	7.06062	8.30442	0.47387
PaF106G0100003598.01	0.429907	0.76669	0.480835	0	0	0	0.553247
PaF106G0100006577.01	0.073409	0.558068	0.725099	0.825909	0.422813	1.16885	0.213125
PaF106G0600021761.01	11.1809	10.6081	10.5055	11.9769	10.6067	10.2294	0.0629226
PaF106G0700029188.01	0	0	0	0	0	0
PaF106G0100004870.01	26.3297	25.3723	25.2778	30.0829	24.304	21.5875	0.0525103
PaF106G0100002073.01	21.5577	18.5958	20.6975	21.3984	21.6467	20.152	0.129605
PaF106G0300011655.01	11.1478	11.6272	10.2403	13.9026	10.7649	10.385	0.0943575
PaF106G0700026721.01	97.1351	101.867	103.607	102.97	119.881	121.555	0.384248
PaF106G0300012383.01	0.712926	1.45778	1.36587	1.33505	0.415281	0.66723	0.176695
PaF106G0200009795.01	0	0	0	0	0	0
PaF106G0300011438.01	37.3622	34.9171	35.9061	29.9417	28.8274	28.712	0.585824
PaF106G0500020703.01	28.9931	28.6625	24.2007	26.6111	25.3285	25.2815	0.162678
PaF106G0200007452.01	0	0	0	0	0	0
PaF106G0200010432.01	21.2964	21.4724	20.5331	19.1838	19.0416	17.9877	0.545745
PaF106G0100004942.01	4.03671	6.29514	5.46548	10.4974	12.3246	11.7199	0.578313
PaF106G0100005908.01	49.7717	46.3466	47.6433	46.6024	52.8238	45.759	0.0553767
PaF106G0300011460.01	0	0.147352	0	0.248402	0.371435	0.206687	0.477765
PaF106G0300010987.01	2.61201	4.21352	2.79732	4.73021	4.99974	2.3385	0.136955
PaF106G0400017053.01	18.2814	18.0558	15.9613	14.5022	13.1441	10.9561	0.497685
PaF106G0100001146.01	7.00921	7.70812	5.92753	2.33669	2.78991	2.96737	0.580202
PaF106G0700026301.01	41.5139	41.0519	40.8242	48.6488	54.7432	56.3424	0.549531
PaF106G0300013661.01	85.0839	90.4085	77.3783	79.2441	64.3006	63.4071	0.404386
PaF106G0100003198.01	45.8688	35.3723	34.6165	24.9072	20.306	20.4063	0.525431
PaF106G0600023277.01	0.754657	0.739198	0.900793	0.390831	0.758131	0.422963	0.372079
PaF106G0400017655.01	3.97864	5.37878	5.13458	0.375664	0.81079	0.671953	0.589659
PaF106G0100004722.01	7.96688	7.99395	8.92611	9.53583	10.0378	9.39048	0.50094
PaF106G0800029297.01	111.229	107.721	115.829	142.545	132.009	135.655	0.570129
PaF106G0600023646.01	0	0	0	0	0	0
PaF106G0100004944.01	0.012564	0.131998	0.096649	0	0	0	0.389022
PaF106G0400015367.01	0.67276	1.15005	0.791624	0.197959	0.194566	0.232849	0.536298
PaF106G0300011632.01	0.100307	0.08857	0.112619	0.234915	0.101829	0.149196	0.278713
PaF106G0100004781.01	0.090733	0.176282	0.19003	0	0	0	0.54405
PaF106G0100002731.01	8.24531	9.7517	10.2165	9.1057	9.16827	7.94657	0.156137
PaF106G0500020647.01	17.4266	17.7105	18.8987	18.6196	15.226	14.8921	0.247072
PaF106G0100001807.01	23.9373	24.9393	27.8141	33.7609	26.2662	25.6845	0.181125
PaF106G0500020719.01	0.14611	0	0.088143	0	0	0	0.32777
PaF106G0500020641.01	0	0	0	0	0	0
PaF106G0100002733.01	117.145	120.86	120.937	118.355	121.531	149.382	0.173525
PaF106G0100002443.01	7.80983	7.46118	7.18294	8.09448	6.25906	6.21476	0.164961
PaF106G0200009401.01	0	0	0	14.0077	13.5104	14.6706	0.6078
PaF106G0100003014.01	0.224078	0.081586	0.536906	3.17734	1.48251	3.6317	0.503791
PaF106G0100005484.01	0.017693	0.162739	0	0	0	0.01726	0.179707
PaF106G0800030969.01	18.2738	17.6929	18.1095	16.2046	16.5269	18.8368	0.167568
PaF106G0400018419.01	0.311235	0.28063	0.461116	0.201978	0.333002	0.438142	0.0628533
PaF106G0100005389.01	36.9911	43.4909	39.3399	36.445	35.3376	34.7244	0.387515
PaF106G0300013917.01	0	0	0	0	0	0
PaF106G0700027243.01	8.12689	10.919	10.0826	12.9931	13.0362	12.1592	0.489943
PaF106G0200010846.01	9.62237	8.86453	9.24413	10.7577	14.8468	11.6517	0.41746
PaF106G0600023644.01	10.9327	10.2808	10.6307	8.25462	8.54729	8.00524	0.590532
PaF106G0800029291.01	4.1845	7.11905	7.37434	21.7438	13.8942	15.3003	0.519785
PaF106G0100005198.01	0.577857	0.262085	0.294862	0.782033	0.42793	0.610384	0.286351
PaF106G0600024451.01	20.2202	20.6714	20.9765	21.1871	27.0632	28.545	0.380708
PaF106G0100003369.01	0.540077	0.546178	0.542503	0.542107	1.04185	0.410867	0.103843
PaF106G0800029812.01	0	0	0	0	0	0
PaF106G0100004724.01	81.9512	84.1357	91.8044	85.404	90.7558	78.0402	0.0595236
PaF106G0800029995.01	0.300351	0.075505	0.308433	1.00797	1.48598	1.03706	0.556282
PaF106G0600023275.01	0	0	0	0	0	0
PaF106G0600024470.01	0.373495	0.645716	0.556951	1.20307	1.11666	0.905308	0.536287
PaF106G0200008293.01	0.25837	0.373093	0.333758	0.628704	0.679027	0.263697	0.267804
PaF106G0600024472.01	10.0472	9.48945	11.7107	9.68529	9.31542	8.38004	0.299429
PaF106G0500018558.01	7.61088	8.66352	8.19106	11.8839	10.2871	8.50702	0.356514
PaF106G0500018820.01	0	0	0	0.025362	0	0	0.170075
PaF106G0400014937.01	0	0	0	0	0	0
PaF106G0600024457.01	189.566	176.433	161.451	151.472	123.351	138.086	0.482531
PaF106G0500020643.01	0	0	0	0	0	0
PaF106G0700029099.01	17.2495	16.1095	20.4412	17.0099	21.0972	19.9409	0.131342
PaF106G0100000695.01	0	0	0	0	0	0
Prunus_sibirica_newGene_659	0	0	0	0.351882	0	0	0.170075
Prunus_sibirica_newGene_658	1.0492	0.978839	0.251662	0.316388	0	0.255961	0.364965
PaF106G0100005602.01	13.1457	14.3215	13.9049	11.2088	12.6484	11.6239	0.496714
Prunus_sibirica_newGene_654	1.17717	1.13172	1.19076	2.73159	2.21477	1.85325	0.527128
Prunus_sibirica_newGene_650	5.95541	6.42122	7.09723	8.77122	7.56011	8.54262	0.498714
Prunus_sibirica_newGene_653	0.341012	0.200621	0	0.086415	0	0	0.263448
Prunus_sibirica_newGene_652	1.40498	1.22885	1.03235	1.83283	1.50762	0.797146	0.0823373
PaF106G0400015468.01	0.076612	0.016484	0.106666	0.020936	0.079956	0.042179	0.0980748
PaF106G0300014359.01	0	0	0	0	0	0
PaF106G0100003213.01	0	0	0	0	0	0
PaF106G0300011629.01	4.71291	4.96416	6.61989	4.15403	3.80167	4.31882	0.376514
PaF106G0600024066.01	10.7781	9.75341	10.5817	13.6964	13.1744	12.9939	0.581064
PaF106G0800031865.01	0	0	0	0	0	0
PaF106G0500021218.01	46.5335	46.0289	47.5913	39.1519	38.6255	39.162	0.601869
PaF106G0200010624.01	0.125479	0.151223	0.186436	0	0.035997	0.046488	0.55828
PaF106G0400016052.01	1.91333	2.70529	2.08812	0.949903	0.985032	0.815893	0.553863
PaF106G0800032772.01	0	0	0	0	0	0
PaF106G0400017278.01	52.6064	69.7646	61.0408	60.8219	49.2554	62.2748	0.0943481
PaF106G0600024003.01	0.169733	0.350933	0.515635	0.512389	0.47906	0.295676	0.113451
PaF106G0300013342.01	9.76739	9.73584	9.53254	14.7293	14.1775	12.8548	0.579968
PaF106G0200009197.01	28.2288	27.5758	30.0736	29.761	28.381	27.7429	0.0500008
PaF106G0300014066.01	34.1251	33.5332	36.93	48.3038	49.9289	47.3915	0.593967
PaF106G0300013240.01	0	0	0	0	0	0
PaF106G0100003276.01	28.8402	31.4014	33.8531	31.7724	32.0988	29.6447	0.0519798
PaF106G0100004689.01	22.4642	21.099	21.341	22.0198	19.7487	24.4118	0.0628278
PaF106G0100003274.01	13.9485	15.0095	17.0358	20.8305	21.1468	20.941	0.56674
PaF106G0600025154.01	3.54452	5.01856	5.03313	6.09294	5.9938	6.59414	0.475453
PaF106G0200009386.01	32.0175	33.9132	35.2025	23.6977	24.6972	29.1327	0.520667
PaF106G0700027274.01	7.06543	8.7266	9.31042	9.61736	10.145	7.46475	0.109165
PaF106G0100001879.01	0.247147	0.170629	0.320495	2.71231	2.59444	2.52897	0.607325
PaF106G0600025217.01	0.308771	0.065939	0.303559	0	0	0	0.446225
PaF106G0200009106.01	96.0983	109.669	92.1921	124.65	86.7554	89.9789	0.0510638
PaF106G0300013344.01	0.519262	0.588287	0.877624	0.706507	0.773632	0.602657	0.0603153
PaF106G0100002022.01	44.7456	41.0497	42.7942	39.0809	36.8199	48.0553	0.0756498
PaF106G0100003215.01	22.4192	19.7984	22.1962	24.777	24.4749	22.1601	0.349778
PaF106G0700027754.01	46.6279	46.8037	38.0569	21.0622	25.8718	24.5065	0.566934
PaF106G0400014931.01	0	0	0	0	0	0
PaF106G0500019241.01	2.93572	4.46796	3.72807	4.91936	4.70914	3.66631	0.215266
PaF106G0500021239.01	162.055	150.66	146.941	149.698	148.61	149.354	0.146266
PaF106G0600025189.01	20.5231	18.5877	21.3046	17.7711	19.8682	16.3008	0.294954
PaF106G0600024455.01	5.82663	6.65072	5.84019	5.92051	5.55811	4.72764	0.283086
PaF106G0400016407.01	0.208688	1.37242	0.604112	5.0616	6.71245	3.22948	0.516878
PaF106G0100005523.01	0.239562	0	0	0	0	0	0.170075
PaF106G0100001622.01	2.96767	2.70856	3.01266	3.00897	1.77532	3.01835	0.114052
PaF106G0600021467.01	9.00615	9.10629	10.7961	14.9423	15.9838	14.5561	0.580738
PaF106G0100000853.01	13.1366	15.3678	15.9494	15.0352	13.1292	12.4444	0.191793
PaF106G0500021265.01	9.09297	13.9502	11.1237	11.4395	9.14917	9.13486	0.155207
PaF106G0100005525.01	0	0	0	0	0	0
PaF106G0400016405.01	9.50205	8.53971	9.55959	13.3124	16.6162	15.0962	0.560394
PaF106G0800032188.01	0	0	0	0	0	0
PaF106G0700026189.01	7.05206	7.08262	7.25348	11.3116	8.35407	9.70768	0.468174
PaF106G0800032466.01	46.4208	46.7995	47.7996	56.3621	62.3402	57.5759	0.567832
PaF106G0200007866.01	6.34264	6.00427	6.55241	4.77125	7.23516	6.96291	0.050123
PaF106G0100005078.01	26.6618	27.7487	27.8048	28.0366	26.4754	30.6578	0.126943
PaF106G0800031721.01	33.0904	33.4694	27.8548	21.3642	15.4426	15.4999	0.55164
PaF106G0400016054.01	0	0	0.688871	4.05553	0	4.81127	0.322156
PaF106G0800032770.01	0	0	0	0	0	0
PaF106G0600024064.01	0	0	0	0	0	0
PaF106G0800031326.01	5.0582	5.163	6.2439	9.20674	7.59014	8.46589	0.54333
PaF106G0100000963.01	61.9009	67.9053	57.0831	61.8133	53.4367	49.63	0.275779
PaF106G0700026739.01	0	0	0	0	0	0
PaF106G0700027683.01	10.562	11.7423	13.0382	10.2777	8.42319	9.91695	0.410584
PaF106G0300013837.01	4.97695	4.89197	2.27032	0.72104	1.7969	0.908117	0.4651
PaF106G0500018945.01	0	0	0	0	0	0
PaF106G0500021267.01	0	0	0	0	0	0
PaF106G0700026305.01	6.58701	5.88547	6.64083	7.63492	7.01834	8.30257	0.451644
PaF106G0200009100.01	178.538	192.281	206.812	190.85	185.76	179.898	0.132744
PaF106G0100003712.01	1.0457	0.703296	1.85921	1.63461	1.92642	3.15443	0.320122
PaF106G0100002024.01	39.7446	35.329	39.0111	33.2501	27.9489	28.1372	0.50448
PaF106G0100005882.01	7.93433	8.1277	6.19421	10.3895	10.0856	8.28559	0.405629
PaF106G0600025215.01	58.1368	55.7658	52.7795	59.826	50.7661	58.9231	0.0617674
PaF106G0100003217.01	41.4432	36.8717	36.8425	43.9284	39.6213	36.5334	0.102071
PaF106G0600024062.01	4.75754	4.92811	5.8688	6.24317	6.77697	6.78451	0.499947
PaF106G0700027756.01	2.26389	2.57824	3.15873	6.05874	7.68904	4.75328	0.513499
PaF106G0400017739.01	10.5803	12.8771	7.73111	10.0289	12.7085	14.153	0.168391
PaF106G0500019792.01	13.0524	19.5362	23.4064	19.8558	25.6089	23.1943	0.214735
PaF106G0100000961.01	0	0	0	0	0.015467	0	0.170075
PaF106G0800031320.01	22.1437	23.7711	25.0565	26.5331	22.594	23.7872	0.0780452
PaF106G0800029593.01	57.1587	55.9524	61.6899	52.4619	49.8191	47.1934	0.500216
PaF106G0700027750.01	2.71233	1.40729	1.79393	0.567725	0.450425	0.494138	0.506442
PaF106G0100005880.01	9.00562	10.2836	9.11902	11.546	11.0423	10.7448	0.492023
PaF106G0600022751.01	10.9601	14.5224	13.9621	11.9645	14.7748	13.131	0.0515247
PaF106G0800029871.01	0	0	0	0	0	0
PaF106G0200008069.01	0	0	0	0	0	0
PaF106G0300013835.01	0.128812	0.295748	0.177434	0	0	0	0.517894
PaF106G0600025326.01	78.086	74.2052	78.2631	79.8224	87.3534	77.2876	0.250546
PaF106G0100005527.01	3.3065	4.39668	4.19456	16.1761	14.682	15.9913	0.604588
PaF106G0300011262.01	0.434817	0.668424	0.621072	1.76338	0.412314	0.723198	0.159131
PaF106G0600025158.01	0	0.137602	0.433286	0.012037	0	0	0.260463
PaF106G0200007860.01	0	0	0	0	0	0
PaF106G0400018239.01	31.1517	31.1727	35.3016	37.6047	36.9331	33.5922	0.335475
PaF106G0800031723.01	0	0	0	0	0	0
PaF106G0100002343.01	7.99731	8.71341	9.09662	8.13449	9.29307	7.20897	0.0941565
PaF106G0100002026.01	11.0027	10.9799	10.8561	11.1215	11.0846	8.82052	0.130603
PaF106G0700026307.01	0.64458	0.680166	1.00607	0.428303	0.620883	0.42733	0.375006
PaF106G0300013896.01	0	0	0	0	0	0
PaF106G0400017549.01	9.4854	9.63605	10.1867	12.7922	13.624	12.0681	0.566115
PaF106G0800029379.01	155.772	167.357	167.785	139.678	166.691	164.242	0.116819
PaF106G0800031680.01	19.6909	17.447	17.7668	18.3912	16.5483	17.911	0.126164
PaF106G0400018237.01	152.179	165.543	159.846	173.626	163.468	164.874	0.291351
PaF106G0600022187.01	0	0	0	0	0	0
PaF106G0300013045.01	0	0	0	0	0	0
PaF106G0300012281.01	5.1828	5.57785	5.15913	6.47089	5.81708	5.48771	0.343323
PaF106G0500019162.01	19.6239	20.8232	22.1996	18.776	20.0082	21.7172	0.103379
PaF106G0800029873.01	0	0	0	0	0	0
PaF106G0500021129.01	7.67991	6.61402	7.86718	7.58642	7.53565	6.93925	0.0508097
PaF106G0400018077.01	11.1939	12.8813	10.7558	31.3282	23.7355	27.1896	0.574536
PaF106G0800029534.01	6.22652	6.61285	7.32693	9.9056	9.67861	8.55543	0.547162
PaF106G0200010399.01	4.08375	4.74526	4.28892	3.0751	3.70731	3.39023	0.501476
PaF106G0500021269.01	149.029	157.899	150.264	164.289	156.815	174.17	0.381636
PaF106G0200007148.01	17.5813	16.218	15.9612	24.8425	21.7695	22.3917	0.564494
PaF106G0100006376.01	4.92951	5.01506	2.63793	10.6824	7.74226	7.14801	0.476434
PaF106G0600024577.01	0	0	0	0	0	0
PaF106G0200007862.01	47.5758	47.7105	47.0938	83.0586	72.9826	78.4758	0.593602
PaF106G0500019860.01	26.4082	20.6564	28.9143	38.1001	48.2031	38.5083	0.514484
PaF106G0800029814.01	0.098306	0.422671	0.259978	0.151927	0.097963	0.19312	0.200839
PaF106G0700027211.01	0	0.273144	0	0	0	0	0.170075
PaF106G0300014214.01	0.643965	0.470648	0.221994	0.398435	0.480609	0.544952	0.0571752
PaF106G0100006077.01	61.0762	62.0282	63.7175	66.8492	63.8835	65.6273	0.439812
PaF106G0700026441.01	58.9074	67.092	80.3255	84.7286	88.5829	88.4728	0.452904
PaF106G0200008037.01	7.81221	8.31014	9.91433	9.94776	13.2344	10.6546	0.379859
PaF106G0800029536.01	18.2073	18.2015	21.4204	21.6045	22.494	20.7507	0.349055
PaF106G0200009023.01	0.092468	0	0.112362	0.109348	0	0.281941	0.1141
PaF106G0400018016.01	0	0	0	0	0	0
PaF106G0500018568.01	0.4444	0.673564	0.880986	0.766692	0.474217	0.592357	0.068486
PaF106G0400018143.01	29.9289	27.265	31.0277	39.8023	40.6027	36.8812	0.565406
PaF106G0500019450.01	5.38369	3.96457	4.07299	3.7045	3.46312	2.70319	0.375512
PaF106G0400014836.01	0	0	0.07147	0	0.080542	0	0.0510152
PaF106G0700028659.01	0	0	0	0	0	0
PaF106G0500020178.01	182.655	166.777	182.136	212.195	233.293	217.461	0.553295
PaF106G0700028599.01	8.05106	6.962	8.82163	10.2535	9.85746	10.7118	0.513009
PaF106G0600024516.01	239.687	222.688	228.408	249.676	243.363	249.253	0.473531
PaF106G0300012287.01	31.6485	30.1006	30.315	32.9682	31.1166	30.0347	0.113852
PaF106G0100006488.01	29.3368	29.8925	33.5079	35.3033	33.6855	32.9323	0.361849
PaF106G0600023152.01	0	0	0	0	0	0
PaF106G0800030412.01	16.5469	18.7662	17.8269	23.1883	22.5439	23.9826	0.577242
PaF106G0100004298.01	8.51164	8.57086	10.2796	10.1493	14.2908	11.5757	0.372695
PaF106G0600022469.01	7.60124	7.84746	9.53864	9.03735	9.06437	9.59294	0.253577
PaF106G0100006075.01	0	0	0.039046	0	0	0	0.170075
PaF106G0200009191.01	0.082561	0.265236	0.04134	0.322031	0.174219	0.08328	0.106044
PaF106G0600023150.01	0	0	0.03538	0	0	0	0.170075
PaF106G0100004448.01	7.66974	11.051	10.0636	6.70035	5.46912	5.2647	0.489403
PaF106G0100006486.01	0	0	0	0	0	0
PaF106G0700028218.01	0.033494	0.045988	0.044183	0	0	0	0.593742
PaF106G0400014645.01	0	0	0	0	0	0.004753	0.170075
PaF106G0300014271.01	0	0	0	0	0	0
PaF106G0600021508.01	0	0	0	0	0	0
PaF106G0400016684.01	0	0	0	0	0.247438	0	0.170075
PaF106G0800030825.01	2.4995	3.55299	4.92473	1.18833	1.15224	1.025	0.498177
PaF106G0300012769.01	15.8816	16.3659	17.5118	15.8367	16.5467	14.6906	0.216898
PaF106G0500021197.01	18.7608	19.5749	19.7834	24.3286	24.4755	24.884	0.600901
PaF106G0600021730.01	6.66126	5.83962	7.57882	2.30409	1.68795	2.77679	0.579378
PaF106G0100005874.01	4.55544	4.24288	5.22843	5.18405	5.17609	4.54452	0.134412
PaF106G0200010151.01	61.3535	60.3139	54.7362	38.8268	37.2865	35.9777	0.590933
PaF106G0400014830.01	0	0	0	0	0	0
PaF106G0100000229.01	25.6475	23.3145	24.3733	30.51	31.9849	29.5209	0.568397
PaF106G0500018678.01	0.246911	0.455334	0.254439	5.61285	5.26455	4.62434	0.602376
PaF106G0700026126.01	14.3594	13.5061	14.8519	13.9278	15.0821	12.6984	0.0750178
PaF106G0600025547.01	1.11131	1.89151	2.39342	1.68597	2.13797	2.14456	0.0809368
PaF106G0200010153.01	22.7542	24.3155	25.3871	20.0484	20.3299	20.2562	0.548998
PaF106G0100003040.01	0.748677	1.27721	1.28225	1.79246	0.822215	0.869843	0.0537603
PaF106G0200009904.01	0	0	0.055228	0.804266	0.353193	0.4344	0.500833
PaF106G0800029633.01	0	0	0	0	0	0
PaF106G0700026120.01	25.195	25.432	27.6252	42.6802	40.6769	37.5946	0.585923
PaF106G0100003078.01	46.2015	47.8975	45.6983	24.3305	33.2008	26.4582	0.573022
PaF106G0500019975.01	10.1566	8.19691	9.52638	6.87133	7.34964	6.42252	0.507036
PaF106G0100001624.01	8.96518	8.52243	7.52625	12.0855	12.3202	10.7608	0.551445
PaF106G0300012381.01	0	0	0	0	0	0
PaF106G0700029245.01	0	0	0	0	0	0
PaF106G0200009021.01	18.2624	13.9905	19.0647	27.2285	28.478	23.8255	0.532571
PaF106G0600024091.01	3.61817	4.88319	6.03775	4.60007	3.51464	3.77088	0.19925
PaF106G0400015390.01	0	0	0	0	0	0
PaF106G0100004049.01	3.61887	3.37137	3.94875	3.97928	4.70371	4.13698	0.388924
PaF106G0600024758.01	0	0.20278	0	0.338617	0	0.251591	0.18175
PaF106G0800032006.01	0	0	0	0	0	0
PaF106G0800030932.01	67.2134	60.1424	66.2628	42.2514	53.6113	51.0143	0.508
PaF106G0100006527.01	5.60891	5.6081	5.97907	7.74312	7.4121	6.4944	0.50633
PaF106G0100005872.01	1.71046	2.84976	2.39773	0.731494	1.13659	1.00258	0.510641
PaF106G0600023001.01	0.479219	0.765675	0.632598	0.424392	0.644759	0.39919	0.209895
PaF106G0800031940.01	143.535	125.952	130.92	120.338	122.762	130.286	0.267498
PaF106G0800030668.01	12.5125	13.7494	13.2791	10.0296	9.617	8.53199	0.571437
PaF106G0800029827.01	0	0	0	0	0	0
PaF106G0400016686.01	0	0.094748	0.174982	0.357545	0.205138	0.234432	0.421057
PaF106G0100005235.01	14.532	16.543	14.4218	11.6751	12.4724	8.22378	0.457897
PaF106G0800031882.01	0	0	0	0	0	0
PaF106G0600022079.01	12.8527	13.2997	15.6013	23.2833	20.6699	18.921	0.536446
PaF106G0200010486.01	6.9777	11.1125	8.65885	7.53442	6.52931	7.0625	0.271926
PaF106G0200009027.01	62.6555	56.6814	56.6575	43.9582	43.5826	43.8215	0.579097
PaF106G0800030827.01	0	0	0	0	0	0
Prunus_sibirica_newGene_411	0.353781	0.188151	0.37512	0.311619	0.07231	0.280432	0.147077
PaF106G0800029690.01	210.833	208.095	237.159	235.876	213.589	195.402	0.0588964
PaF106G0400015365.01	9.74495	13.1817	11.9395	10.4564	9.00753	9.23639	0.33237
PaF106G0300012119.01	854.38	851.624	749.755	501.762	489.689	607.246	0.558423
PaF106G0800029717.01	35.126	38.1382	40.2446	51.2489	41.8841	50.0636	0.460541
PaF106G0600024097.01	0.432252	0.66194	0.569013	1.20381	1.23763	1.14238	0.587535
PaF106G0700029247.01	2.97601	2.81375	3.74498	4.05064	4.55969	3.4239	0.338995
PaF106G0800030821.01	37.7862	51.5101	46.8209	49.6635	44.8708	32.3307	0.0805687
PaF106G0800029711.01	2.30404	2.64226	2.71266	3.29607	3.62696	2.819	0.42645
PaF106G0200010484.01	21.1688	19.7194	21.2008	28.9268	29.1938	26.2375	0.575238
PaF106G0100003884.01	0	0	0	0	0	0
PaF106G0800029595.01	1.71128	2.12726	2.28535	1.04015	1.3197	1.33308	0.52112
PaF106G0700026769.01	1.09418	0.699841	1.37409	0.983324	1.3646	1.24659	0.103046
PaF106G0700026122.01	134.887	120.048	118.574	157.445	135.098	150.967	0.441206
PaF106G0100004444.01	3.1147	2.59988	2.85349	4.58333	4.78289	4.53908	0.594055
PaF106G0800032244.01	0	0	0	0	0	0
PaF106G0800032667.01	0	0	0.06967	0	0	0	0.170075
PaF106G0500018879.01	9.04762	9.91931	9.63795	11.7918	12.0504	10.5183	0.495941
PaF106G0500021030.01	2.17478	2.85707	2.79423	4.56915	3.73811	3.30074	0.45462
PaF106G0700026181.01	30.2587	32.379	31.9974	41.0184	37.8665	39.3699	0.575663
PaF106G0400015363.01	0	0	0	0	0	0
PaF106G0100003689.01	30.5421	26.7544	25.3933	21.615	20.392	25.7688	0.382585
PaF106G0300014357.01	0	0	0	0	0	0
PaF106G0800029959.01	6.56527	5.58421	7.21356	3.38545	4.11743	3.26788	0.552061
PaF106G0300012699.01	0	0	0	0	0	0
PaF106G0500019098.01	0	0	0	0	0	0
PaF106G0800032378.01	58.6186	56.5553	66.9726	53.7464	48.1734	50.022	0.445201
PaF106G0500019164.01	0.923289	0.626638	0.71196	1.1023	1.64401	1.19822	0.458278
PaF106G0500020589.01	42.348	43.6777	51.9786	58.325	52.2726	56.2888	0.440002
PaF106G0300013847.01	41.1165	42.0092	39.9101	39.6952	41.4146	36.2054	0.20133
PaF106G0700029160.01	0	0	0	0	0.159884	0.176811	0.351501
PaF106G0100005164.01	9.3221	10.2376	9.10711	14.1032	15.7953	14.2649	0.583295
PaF106G0800030263.01	0	0	0.14435	0	0	0	0.170075
PaF106G0400017164.01	47.7997	51.4049	58.3219	55.0562	70.5347	66.2351	0.361205
PaF106G0800029713.01	6.10098	6.42285	7.95242	9.02659	8.42671	7.80994	0.402148
PaF106G0200007039.01	0	0	0	0	0	0
PaF106G0400016312.01	0	0	0	0.037349	0.032813	0.019625	0.558501
PaF106G0100006438.01	0	0	0	0.059075	0	0.061646	0.352409
PaF106G0200007275.01	1.16614	1.16862	1.82769	3.6162	3.74425	2.75641	0.550963
PaF106G0100003511.01	2.26384	1.74363	1.9309	6.8546	6.72702	5.72014	0.595874
PaF106G0200007501.01	0.798082	0.873557	0.895085	0.761576	0.706164	0.610827	0.465884
PaF106G0100003972.01	0.235864	0.262322	0	0.207455	0.100144	0	0.101349
PaF106G0300011942.01	7.10076	8.66757	8.67574	12.7118	11.1857	10.9703	0.535685
PaF106G0500021004.01	0	0	0	0	0	0
PaF106G0600025603.01	41.5689	41.4813	45.7524	56.3543	57.3593	55.4468	0.587683
PaF106G0300013242.01	0	0	0	0	0	0
PaF106G0300011944.01	17.8467	15.4069	14.5563	27.7134	28.1096	30.6892	0.590261
PaF106G0600021469.01	1.34905	1.26226	1.46105	1.76085	1.92893	1.36621	0.331002
PaF106G0200007277.01	5.6768	4.02949	5.06799	10.929	10.555	9.94758	0.59176
PaF106G0100000597.01	0	0	0	0	0	0
PaF106G0700028518.01	0	0	0	0	0	0
PaF106G0500018614.01	22.263	20.8326	24.1377	17.8234	16.8574	15.7704	0.545558
PaF106G0600023350.01	0	0	0	0	0	0
PaF106G0500020057.01	0.97066	0.591036	0.667191	1.20811	1.05705	0.732845	0.251353
PaF106G0300014355.01	0	0	0	0	0	0
PaF106G0300013489.01	0.061069	0	0	0	0	0	0.170075
Prunus_sibirica_newGene_1120	0.206461	0.336442	0.128286	1.12131	0.684565	1.04492	0.544378
Prunus_sibirica_newGene_1123	1.31297	1.18036	1.31476	0.612918	0.692807	0.741878	0.592253
Prunus_sibirica_newGene_1122	3.89148	3.69174	3.64406	4.0535	3.67432	3.40544	0.0534094
Prunus_sibirica_newGene_1125	34.4085	38.0088	36.7561	41.0064	40.6789	39.3924	0.487472
Prunus_sibirica_newGene_1127	0	0	0.476001	0	0	0	0.170075
Prunus_sibirica_newGene_1126	4.21272	4.76708	4.47688	1.84742	1.7922	2.41959	0.590655
Prunus_sibirica_newGene_1129	0	0.096102	0.415049	0	0.061258	0	0.20603
Prunus_sibirica_newGene_1128	1.7752	1.31906	2.25938	1.66177	1.39375	1.03546	0.2278
PaF106G0700029066.01	0.726523	0.697137	1.12889	1.64338	1.8517	1.6886	0.560165
PaF106G0400017272.01	12.6157	13.0229	13.9875	12.0119	12.7579	13.1123	0.193474
PaF106G0500021179.01	2.189	2.98582	2.61881	3.66745	3.08951	2.06828	0.107845
PaF106G0400017418.01	0	0	0	0	0	0
PaF106G0700029060.01	0	0	0	0	0	0
PaF106G0100001452.01	0	0.355477	0	0	0	0	0.170075
PaF106G0100005015.01	0.092196	0.431633	1.80969	0.583064	1.651	0.174575	0.0501912
PaF106G0100005752.01	0.026007	0.108693	0	0	0	0.072403	0.0856757
PaF106G0100005846.01	26.6916	25.1895	27.4071	33.5312	39.396	36.1938	0.555799
PaF106G0100003166.01	82.7172	83.3746	82.6014	85.7114	82.1591	77.7081	0.0775499
PaF106G0500020684.01	5.28445	4.34197	5.22906	7.24104	6.14814	6.0821	0.473133
PaF106G0100000696.01	0	0	0	0	0	0
PaF106G0400016128.01	0	0	0	0	0	0
PaF106G0100005166.01	23.3824	21.6233	24.1953	19.8127	21.9411	19.8874	0.409448
PaF106G0200008993.01	0.662108	0.869318	0.804519	2.24183	1.66613	1.00448	0.400775
PaF106G0400017162.01	0.033364	0	0	0	0	0.087854	0.0954599
PaF106G0500020292.01	80.7182	81.1387	77.8056	66.0696	61.9004	63.8514	0.591975
PaF106G0500020988.01	38.2993	35.9553	40.466	45.6441	45.4698	42.7064	0.513861
PaF106G0200007347.01	0	0.159219	0	0	0	0.080783	0.0767559
PaF106G0100003846.01	18.5845	18.6439	21.997	20.8773	19.8781	22.0271	0.154667
PaF106G0100003473.01	0.43417	0.928173	0.784573	1.09578	0.445788	0.417156	0.0579057
PaF106G0100003219.01	125.01	118.48	121.149	122.011	119.998	118.163	0.110739
PaF106G0200008146.01	0	0	0	0	0	0
Prunus_sibirica_newGene_1787	0.964639	0.667079	0.754546	0.278543	0	0.234269	0.547489
Prunus_sibirica_newGene_1786	1.85132	4.28458	3.83911	3.83329	3.86598	3.67444	0.101751
PaF106G0500020290.01	137.1	126.95	126.767	141.488	136.199	146.628	0.410346
Prunus_sibirica_newGene_1780	13.3123	13.014	9.3541	4.77169	4.22343	3.59741	0.561856
Prunus_sibirica_newGene_1783	0.24242	0.225068	0.057351	0.405115	0.115725	0.066721	0.0542574
PaF106G0100002602.01	0	0.144729	0.142867	0.116709	0	0.019072	0.139856
PaF106G0200007349.01	0	0	0	0	0	0
PaF106G0100003475.01	0.18449	0.506322	0.06691	0.792724	0.117494	0.500348	0.155227
Prunus_sibirica_newGene_1789	6.88794	7.12515	8.15932	7.15143	7.98401	7.81419	0.0920477
PaF106G0100005252.01	4.62374	6.33121	6.6591	6.68863	6.81674	5.48528	0.0990177
PaF106G0100004624.01	1.26519	1.02486	0.848863	0.881243	0.689558	0.602812	0.380617
PaF106G0200008324.01	7.87741	8.17064	8.0579	10.8573	10.8615	7.53919	0.277428
PaF106G0400015038.01	0	0	0	0	0	0
PaF106G0700028651.01	30.1185	28.5191	31.0241	33.7505	34.1761	30.1051	0.334197
PaF106G0800032308.01	0	0	0	0.162864	0	0	0.170075
PaF106G0100002514.01	1.73376	1.50898	1.54748	0	0	0	0.60555
PaF106G0400016712.01	11.4755	9.98947	11.8765	13.0921	15.6396	13.6181	0.468469
PaF106G0500018794.01	11.2699	12.0286	10.9923	6.86416	7.42477	7.23116	0.597316
PaF106G0400017291.01	0	0	0	0	0	0
PaF106G0400017645.01	0.854903	0.660638	0.336943	0	0	0	0.5194
PaF106G0400017160.01	7.16899	6.74873	7.69499	7.60718	8.31464	8.21572	0.40347
PaF106G0600023281.01	0	0	0	0	0	0
PaF106G0200008995.01	0.406425	0.53389	0.668973	0.458506	0.92604	0.623155	0.140915
Prunus_sibirica_newGene_1871	0	0	0	2.86235	2.8703	2.144	0.594624
Prunus_sibirica_newGene_1870	6.95639	7.8777	8.95301	10.5837	9.7724	8.82933	0.397848
PaF106G0400017293.01	0	0	0	0.110968	0	0.028352	0.248653
Prunus_sibirica_newGene_1874	1.42512	0.921698	0.882845	0.72961	0.599942	0.646675	0.397246
PaF106G0700028120.01	0	0	0	0	0	0
PaF106G0600023287.01	16.306	17.4814	16.9871	17.1557	15.4071	16.1713	0.192937
Prunus_sibirica_newGene_1878	0.654717	0.267441	0.189272	0	0.615406	0.165857	0.0806531
PaF106G0300013898.01	1.49375	1.94598	1.64835	4.38332	5.03018	4.74186	0.599024
PaF106G0800032830.01	0	0	0	0	0	0
PaF106G0600023007.01	0	0	0	0	0	0
PaF106G0100005250.01	7.48019	7.66527	7.22504	7.36069	7.93418	8.05246	0.231669
PaF106G0100006548.01	0	0	0.302722	0	0	0	0.170075
PaF106G0100002604.01	0.146323	0.144447	0.188899	0.171182	0.143097	0.217666	0.108934
PaF106G0300011967.01	7.51477	7.09896	8.18965	12.754	10.2067	13.5584	0.527522
PaF106G0700029062.01	1.49954	1.56599	1.44693	0.466366	0.489827	0.620208	0.602601
PaF106G0800032558.01	0.515416	0.488642	0.402602	2.96687	3.06336	3.16323	0.607667
PaF106G0100005017.01	0	0	0.173654	0.006694	0	0.108396	0.0617505
PaF106G0200008125.01	0	0	0	0	0	0
PaF106G0500020422.01	0.403067	0.198279	0.070125	0.327755	0.392525	0.218772	0.134746
PaF106G0500020790.01	33.3537	32.6717	31.8196	43.011	36.5522	39.3698	0.500858
PaF106G0200007409.01	0.250185	0.405874	0.385448	1.0307	0.899381	0.679147	0.536154
PaF106G0700027057.01	0.032349	0	0.064416	0.07351	0.04814	0.106764	0.31206
PaF106G0100002516.01	0.292015	0.766599	1.01855	1.96179	2.10256	0.811966	0.356143
PaF106G0100005233.01	0	0.072305	0.148421	0.092765	0.032467	0	0.102675
PaF106G0100002085.01	10.102	9.95037	11.1167	10.6127	11.5874	9.96461	0.0919753
PaF106G0400016137.01	0.353124	0.242768	0.236378	0.956695	1.47686	1.09347	0.5581
PaF106G0600022757.01	0.746726	0.794016	0.126686	0.185541	0.534493	0.212135	0.172192
PaF106G0700026867.01	21.2904	19.1515	20.8688	21.4107	23.299	21.3855	0.313448
PaF106G0600022240.01	3.64754	4.1536	4.51224	4.43288	4.07698	4.07838	0.0653432
PaF106G0500021095.01	0.485017	0.24813	0.31245	0.790693	0.37044	0.39302	0.19055
PaF106G0100003477.01	0	0	0	0	0	0
PaF106G0600025324.01	0	0.071561	0.343554	0.151561	0.076949	0.047648	0.075031
PaF106G0600022108.01	167.317	166.927	147.67	125.363	114.631	106.852	0.553511
PaF106G0800030025.01	5.41541	5.18527	4.71422	5.99115	5.67151	4.57154	0.105074
PaF106G0500021175.01	8.07572	8.7348	11.148	10.4538	10.2852	7.84467	0.0539115
PaF106G0700028653.01	0	0	0	0	0	0
PaF106G0200007254.01	0.0306	0	0.055753	0	0	0	0.31919
PaF106G0200008322.01	8.79303	5.68836	6.43672	4.64236	5.15313	5.04073	0.372003
PaF106G0100004626.01	35.3333	36.6808	37.9376	50.959	51.7434	52.3329	0.603318
PaF106G0200009174.01	0.037859	0.094705	0.056274	0.21112	0.360681	0.191233	0.487937
PaF106G0100005011.01	0	0	0	0	0	0
PaF106G0400017003.01	0	0	0.120265	0.379961	0.537124	0	0.289882
PaF106G0300012232.01	1.67582	2.12802	2.49204	2.06903	1.87234	2.02348	0.0784191
PaF106G0600023835.01	0	0	0	0.081665	0.026957	0.108288	0.461975
Prunus_sibirica_newGene_247	6.6861	8.04053	8.00787	4.8073	6.22296	6.00676	0.462697
PaF106G0700027538.01	22.5314	29.3927	34.6621	12.3956	17.3209	16.2632	0.495107
Prunus_sibirica_newGene_245	3.66414	3.73101	3.33996	3.41031	4.01063	3.17796	0.0538608
Prunus_sibirica_newGene_242	0	0	0	0.378955	0	0	0.170075
Prunus_sibirica_newGene_243	5.76671	5.49573	4.33765	1.27941	1.13768	1.67589	0.584218
PaF106G0400015972.01	87.3793	107.25	95.6983	48.9242	36.5656	40.1462	0.583148
PaF106G0100004442.01	0.015286	0.00012	0	0	0	0	0.172406
Prunus_sibirica_newGene_248	0.270107	0	0.058521	0.427154	0.175679	0.042654	0.124377
PaF106G0200009176.01	47.9528	52.4318	55.8775	57.8528	54.2795	51.9458	0.152362
PaF106G0800031546.01	39.8544	53.6417	49.5635	15.2213	17.5759	21.0196	0.572769
PaF106G0400016238.01	0	0	0	0	0.155483	0.118394	0.344745
PaF106G0600023679.01	1.25145	1.68899	1.08158	1.86929	1.71423	2.34925	0.406691
PaF106G0600023285.01	0	0	0	0	0	0.153361	0.170075
PaF106G0600023832.01	0.759792	0.529063	0.912988	2.00453	2.1531	2.04269	0.595094
PaF106G0100005383.01	18.4102	16.799	18.4167	19.6375	20.2903	17.6418	0.243237
PaF106G0600021418.01	402.214	367.528	370.442	439.598	424.423	458.463	0.519641
PaF106G0100001179.01	31.5	42.4389	36.5472	18.7391	17.6982	19.9369	0.557838
PaF106G0600025370.01	12.7062	12.6401	12.9838	14.5872	14.0609	13.2249	0.45082
PaF106G0300011467.01	2.64272	2.3605	3.02891	3.02688	3.24805	3.52613	0.408938
PaF106G0100002606.01	13.7032	14.9828	15.1109	13.1515	12.207	13.0778	0.480772
PaF106G0400017882.01	14.0352	14.7568	14.1995	28.1458	24.9653	26.8191	0.598747
PaF106G0300011604.01	0.437461	0.322062	0.446335	0.122605	0.292197	0.16745	0.47572
PaF106G0300011299.01	0	0	0.216065	0	0	0	0.170075
PaF106G0200010014.01	40.3149	38.7335	41.668	27.8941	30.6508	29.6628	0.589303
PaF106G0200008320.01	225.289	217.24	219.649	236.689	233.973	250.288	0.493175
PaF106G0500020522.01	7.44246	7.96011	8.76856	6.16601	6.69351	5.63082	0.509368
PaF106G0600024798.01	182.854	185.016	182.689	278.552	218.36	246.833	0.50292
PaF106G0500018676.01	5.01723	4.74196	5.77122	4.847	5.47697	4.47126	0.0949633
PaF106G0200006826.01	2.7813	4.64046	5.36492	3.6567	3.70213	4.35925	0.0773123
PaF106G0100002213.01	0.971584	1.12789	1.36551	1.72694	2.193	2.07595	0.537937
PaF106G0500020524.01	22.8538	21.9837	21.3186	25.6022	25.4895	23.0855	0.44972
PaF106G0200010016.01	0.688722	0.354835	0	0.11086	0.206719	0.155413	0.159749
PaF106G0100000704.01	0	0	0	0	0	0
PaF106G0400018440.01	0.062726	0	0.084762	0	0	0	0.343087
PaF106G0500018454.01	0.126141	0.192322	0.095439	0.289403	0.2019	0.335423	0.447521
PaF106G0100001618.01	0.777072	0.57578	0.543406	0.120523	0.418928	0.195461	0.483919
PaF106G0700026861.01	0	0	0	0	0	0
PaF106G0800029818.01	0	0	0.028004	0.095194	0.062417	0.116752	0.532526
PaF106G0100000534.01	3.40595	3.44214	3.80051	5.53731	5.29905	4.5756	0.547043
PaF106G0500020264.01	0.848587	0.882593	0.965114	2.34277	1.4219	1.1854	0.369265
PaF106G0500021093.01	93.386	90.7329	90.6937	91.9152	88.4497	83.5776	0.250738
PaF106G0400018370.01	0.436495	0.16622	0	0.171308	0.210745	0	0.0863731
PaF106G0100005385.01	8.07582	9.75245	8.93666	6.90952	6.90035	6.97803	0.520271
PaF106G0700028243.01	5.44484	3.87774	5.43626	4.65564	4.67832	4.4166	0.104194
PaF106G0500021284.01	0	0.215172	0	0	0.358506	0.060518	0.0862869
PaF106G0100002153.01	0	0	0	0	0	0
PaF106G0600022052.01	26.869	30.0682	29.2918	23.6101	23.6543	28.4716	0.331474
PaF106G0500021282.01	51.6667	48.5563	51.0663	45.3485	40.2669	43.5472	0.522643
PaF106G0100006661.01	14.4583	12.2906	12.8107	9.91747	11.2278	9.15438	0.490745
PaF106G0700028045.01	146.946	155.344	125.893	141.605	120.991	110.954	0.25886
PaF106G0400016738.01	0	0	0	0	0	0
PaF106G0200008442.01	6.94921	8.02572	7.50973	12.2068	14.0768	12.8002	0.586976
PaF106G0500021002.01	0	0	0	0	0	0
PaF106G0300011295.01	0	0.063942	0	0	0	0	0.170075
PaF106G0100003335.01	0	0	0	0	0	0
PaF106G0600022647.01	0.675073	0.317072	0.198846	1.58499	1.31073	1.62271	0.569055
PaF106G0800031298.01	0	0	0	0	0	0
PaF106G0300012228.01	0	0	0	0	0	0
PaF106G0700026629.01	0.413047	0.944939	0.893516	2.09616	2.06778	1.34632	0.500124
PaF106G0400014667.01	0.013729	0	0	0.166578	0.083775	0.13249	0.546953
PaF106G0500020262.01	12.3187	13.2707	13.5523	11.7269	11.1743	9.98258	0.479858
PaF106G0500018562.01	2.56594	2.64462	2.7971	3.35876	3.28569	2.19563	0.118889
PaF106G0500018617.01	0	7.24635	3.55836	0	5.93246	6.32973	0.0539277
PaF106G0400014661.01	21.0228	18.44	20.2754	13.1433	15.4839	12.4324	0.5504
PaF106G0600023356.01	0	0	0	0	0	0.030077	0.170075
PaF106G0600025094.01	15.3123	14.5991	15.9585	17.914	17.7681	17.2275	0.552128
PaF106G0400014679.01	0	0	0	0	0	0
PaF106G0700026675.01	3.03153	3.22803	3.14415	4.26742	4.78964	4.34823	0.581338
PaF106G0200009478.01	3.8365	4.59323	4.30389	3.45926	4.19255	4.02914	0.194171
PaF106G0200009273.01	0	0	0	0.044406	0	0	0.170075
PaF106G0400015433.01	0	0	0	0	0	0
PaF106G0500020526.01	15.0227	12.4737	17.1473	13.3196	15.7576	14.002	0.0662408
PaF106G0500019638.01	0	0	0	0	0	0
PaF106G0700026563.01	0	0	0	0	0	0
PaF106G0600023205.01	34.9426	34.6711	29.0524	36.9153	26.1382	27.5491	0.112996
PaF106G0500018452.01	3.36224	3.77329	4.85834	11.6792	12.1147	12.6875	0.601524
PaF106G0500019424.01	11.8495	14.2856	13.7347	13.7363	15.5402	14.2107	0.233769
PaF106G0600024624.01	0.525825	0.598109	0.585362	1.42388	2.21685	1.38016	0.51782
PaF106G0600022641.01	207.424	183.564	207.392	204.953	248.525	238.782	0.357053
PaF106G0300014497.01	62.1441	60.3106	73.2245	72.1163	77.3881	72.038	0.346223
PaF106G0800030605.01	162.001	175.531	190.033	215.402	202.569	213.297	0.509031
PaF106G0500019426.01	1.52921	0.988496	0.539639	1.13174	1.3191	1.23081	0.116967
PaF106G0100003390.01	0.259746	0.288258	0.403045	0.320506	0.258532	0.151428	0.192779
PaF106G0100006293.01	0.69645	2.30456	1.84199	0	0.632846	0.226509	0.424755
PaF106G0500021280.01	0.417703	0.398631	0.540637	0.537542	0.688185	0.34849	0.109709
PaF106G0800030516.01	4.77541	4.34334	3.61191	7.60719	8.06017	5.60878	0.489794
PaF106G0600024282.01	4.53045	5.52501	6.63613	3.4139	3.57511	3.14299	0.493767
PaF106G0600022042.01	0.989309	0.980346	1.42912	0.892825	0.543379	1.27416	0.148729
PaF106G0600022365.01	152.38	170.122	165.954	140.007	134.355	130.33	0.536639
PaF106G0500018581.01	11.8775	11.6086	13.3034	15.4402	14.6539	13.1882	0.422171
PaF106G0600022181.01	0	0.179365	0	0	0.015427	0	0.152662
PaF106G0300014472.01	0	0	0	0.480446	0.864052	1.52299	0.470553
PaF106G0600025801.01	10.1243	9.84848	8.78857	12.0688	10.2517	10.3271	0.321524
PaF106G0600023690.01	0	0	0	0	0	0
PaF106G0500018450.01	17.0528	19.1898	21.9169	19.1543	20.061	18.1535	0.0543319
PaF106G0300011574.01	0	0	0.195778	0	0	0	0.170075
PaF106G0300014470.01	15.0243	18.5827	17.2242	23.2922	18.6416	16.569	0.198132
PaF106G0700025934.01	0	0	0	0	0	0
PaF106G0200010371.01	0	0	0	0	0	0
PaF106G0200009713.01	0	0	0	0	0	0
PaF106G0300014496.01	3.07048	2.28093	3.54715	3.45439	4.72346	5.21206	0.397035
PaF106G0200007176.01	0	0	0	0	0	0
PaF106G0600023692.01	10.9624	13.9546	15.1637	17.3205	16.9144	15.542	0.401822
PaF106G0600025150.01	9.45462	11.617	11.8021	10.4894	11.4424	9.46416	0.087111
PaF106G0200009978.01	9.00815	8.53307	8.02962	7.57367	9.05317	8.90794	0.0500686
PaF106G0600025699.01	12.9174	14.5161	14.7663	12.7745	11.6854	13.269	0.352883
PaF106G0300014491.01	0	0	0.078664	0	0	0	0.170075
PaF106G0300011748.01	11.2547	13.3667	14.4951	11.7615	12.1851	15.104	0.0500344
PaF106G0700026677.01	1.1493	1.75242	1.12975	0.990748	0.275806	0.257394	0.429828
PaF106G0700028880.01	2.29669	0.72263	1.28039	3.54848	3.55864	4.25894	0.53482
PaF106G0400015275.01	0	0	0	0.186835	0	0	0.170075
PaF106G0400016318.01	0.07785	0.086	0.061517	0.710694	0.304411	0.117403	0.309052
PaF106G0800031511.01	0.661514	0.95262	0.78207	0.567189	1.18032	1.23015	0.140305
PaF106G0800032338.01	0.529951	0.360554	0.765597	1.47364	1.94103	0.305671	0.244797
PaF106G0400015431.01	0	0	0	0.365214	0.299772	0.469038	0.58075
PaF106G0300013558.01	29.6535	28.9896	27.222	25.6721	26.3304	24.3078	0.486609
PaF106G0600024095.01	12.8886	14.7677	16.2985	21.1137	21.9785	18.5884	0.522485
PaF106G0400015437.01	1.01501	1.52823	1.36949	0.407081	0.159499	0.290573	0.565116
PaF106G0800032336.01	16.4489	14.6827	13.8187	16.2613	17.4643	18.7033	0.402282
PaF106G0100006081.01	0	0	0	0	0	0
PaF106G0500021261.01	0.119232	0.358057	0.110981	1.8767	2.55656	1.77879	0.577765
PaF106G0300012505.01	189.982	221.825	232.866	249.008	245.787	262.818	0.436483
PaF106G0100000787.01	2.06358	3.21588	3.31467	1.18774	1.88197	2.48372	0.32901
PaF106G0100003886.01	0	0.283732	0.131773	0	0.273529	0.113795	0.0509699
PaF106G0800030040.01	0.142973	0.15072	0	0	0	0.041811	0.295671
PaF106G0100003838.01	15.102	19.1337	21.4958	31.3772	24.1958	29.8381	0.489586
PaF106G0400017313.01	13.0149	17.3371	19.3525	16.8235	16.9741	15.0051	0.0533077
PaF106G0800030607.01	3.41068	2.61623	3.05023	2.19952	0.882981	1.80867	0.46641
PaF106G0600025171.01	4.09601	4.81593	5.69162	7.01034	7.04734	6.06346	0.479107
PaF106G0300013724.01	5.11562	3.7663	4.98124	6.46123	8.38214	7.86268	0.52041
PaF106G0300014561.01	16.9042	15.9349	17.8308	19.2723	16.219	17.5427	0.124442
PaF106G0600025529.01	29.7569	32.5557	33.4689	31.4073	28.4518	28.6625	0.295851
PaF106G0800030023.01	11.893	11.6285	15.2618	10.0194	10.5902	10.7573	0.36353
PaF106G0500021281.01	19.8839	20.5767	23.4519	23.023	22.4355	22.5977	0.219742
PaF106G0200009487.01	19.7437	19.9205	18.9736	20.2579	21.3771	24.0483	0.355844
PaF106G0500021173.01	9.19358	9.89846	9.89943	8.68933	6.24438	7.03079	0.467082
PaF106G0100005098.01	16.3932	16.1208	16.2631	17.3771	14.2002	12.409	0.189528
PaF106G0500019708.01	0.48222	0.704748	0.417802	0.833042	0.732199	0.817031	0.444709
PaF106G0300013554.01	0.199414	0.177736	0.173101	0.0741	0.140501	0.102447	0.504007
PaF106G0100006087.01	11.4429	14.1107	13.878	4.46629	4.14177	5.59365	0.587091
PaF106G0500018731.01	8.37217	7.57235	7.99193	10.9864	12.3936	10.8373	0.567597
PaF106G0100002998.01	8.94416	10.673	10.3941	12.6591	10.5947	9.61941	0.153254
PaF106G0500021200.01	6.35296	6.09144	6.55334	6.36994	6.95134	5.76756	0.0509793
PaF106G0600025152.01	123.432	133.002	150.218	61.9822	55.0398	89.9303	0.546952
PaF106G0300014493.01	7.16884	9.79902	11.4688	2.9804	2.35193	2.41608	0.555226
PaF106G0800030601.01	0.487342	0.074446	0.136138	0.283826	0.098365	0.230244	0.055901
PaF106G0800032355.01	0	0	0	0	0	0
PaF106G0300013722.01	19.7204	16.157	19.8402	26.5408	29.9385	28.9237	0.567916
PaF106G0500019094.01	0	0	0	1.74499	0.936109	0.338316	0.41213
PaF106G0600025376.01	42.7309	41.3133	48.8949	35.0936	36.3863	34.2037	0.506019
PaF106G0300011036.01	29.5472	33.8551	39.3927	21.981	26.7436	24.3029	0.47031
PaF106G0400015124.01	14.2662	14.6985	18.6739	16.2438	18.3608	15.8345	0.0956502
PaF106G0600024363.01	76.5379	75.0179	81.6093	89.976	92.4027	89.6406	0.563501
PaF106G0300011344.01	1.12261	1.99687	1.77507	5.94989	4.78454	3.48698	0.519895
PaF106G0400017431.01	0	0	0	0	0	0
PaF106G0600025265.01	0.232585	0	0.058292	0.069058	0.120156	0.130356	0.0524919
PaF106G0100000938.01	0	0	0	0	0	0
PaF106G0500021263.01	57.0925	56.1606	59.5318	62.0106	64.8873	59.8058	0.426083
PaF106G0700027658.01	0.704333	0.725817	0.915006	0.380057	0.499901	0.06537	0.474594
PaF106G0500020986.01	1.32794	1.13959	1.43556	2.05768	2.07907	1.78377	0.551233
PaF106G0800029325.01	258.534	330.386	324.364	381.061	310.094	350.482	0.247003
PaF106G0100001704.01	1.50538	1.91088	1.96013	0.711055	1.27238	1.5966	0.355858
PaF106G0300011053.01	27.6559	30.1674	27.3874	26.1751	23.555	22.2668	0.463088
PaF106G0300013162.01	0	0	0	0	0	0
PaF106G0400016850.01	0.032649	0	0	0	0	0	0.170075
PaF106G0300011692.01	10.8316	10.0389	10.2917	11.4531	11.8144	10.6937	0.393412
PaF106G0100006085.01	10.8685	13.39	14.7339	13.0276	12.0213	10.4857	0.141563
PaF106G0700028349.01	41.4614	35.2129	43.2339	36.4778	39.027	41.2799	0.0693447
PaF106G0400017423.01	0.085677	0.331942	1.86261	2.41123	0.669321	0	0.0621715
PaF106G0600021951.01	2.95202	2.47037	1.69863	3.40935	4.03508	3.82835	0.486173
PaF106G0200007455.01	0	0	0	0	0	0
PaF106G0600022021.01	59.8729	50.8915	48.8506	47.8531	48.1985	43.8936	0.320434
PaF106G0400015055.01	0	0	0	0	0	0
PaF106G0700027377.01	1.31526	2.50343	2.25067	4.14519	3.02573	3.68612	0.480044
PaF106G0600021953.01	11.0987	10.4061	12.7716	12.5826	11.8586	13.188	0.248862
PaF106G0100001706.01	0.220264	0.170537	0.418707	0.901324	0.776177	0.572142	0.512996
PaF106G0100000836.01	0.088853	0.055718	0	0.06588	0	0	0.126949
PaF106G0700025935.01	34.4751	33.8491	28.5731	31.023	33.4326	30.5266	0.06333
PaF106G0400017433.01	21.3809	22.7404	24.7805	26.8147	27.5841	22.9999	0.294121
PaF106G0400015126.01	157.331	148.531	187.427	167.304	176.768	194.402	0.182079
PaF106G0200007899.01	0	0	0	0	0	0
PaF106G0800029342.01	0.843282	1.80466	0.730317	1.41128	0.978997	1.7066	0.0980701
PaF106G0400018262.01	27.4321	30.4234	26.8448	16.6699	17.1113	18.6835	0.585739
PaF106G0700026211.01	18.0494	18.0702	20.1737	10.8889	9.18393	11.0471	0.588584
PaF106G0700028179.01	313.516	299.197	274.35	261.92	232.039	249.628	0.482961
PaF106G0800029340.01	12.8136	15.0357	14.5642	12.6912	12.586	11.6941	0.407899
PaF106G0400015212.01	0	0	0	0	0	0
PaF106G0600021843.01	0.58478	0	0.339174	0	0	0.241644	0.212398
PaF106G0500018729.01	5.43081	6.18002	7.79405	6.0337	4.80615	5.59551	0.222439
PaF106G0600022023.01	56.671	76.3849	83.1276	72.4574	95.191	90.3473	0.234744
PaF106G0100006654.01	24.8324	24.3965	25.4712	30.3426	31.5811	28.7236	0.564279
PaF106G0800031270.01	0.143006	0.103536	0.121583	0.555825	0.87787	0.377355	0.479426
PaF106G0100006379.01	0	0.295299	0.123484	0.15814	0.24731	0.169218	0.0949955
PaF106G0400015098.01	0	0	0	0	0	0
PaF106G0800032388.01	0	0	0	0	0	0
PaF106G0100006572.01	1.95665	3.68899	1.5305	4.74752	3.93255	2.24593	0.222789
PaF106G0500019530.01	58.8023	58.0993	63.3385	113.282	100.756	103.137	0.594687
PaF106G0200007432.01	0	0	0.105691	0.162893	0.19523	0.245162	0.511667
PaF106G0600024528.01	0	0.251406	0.195	0.195385	0.288945	0.121759	0.0969596
PaF106G0200007575.01	0	0	0	0.045801	0	0	0.170075
PaF106G0600022044.01	18.9152	16.933	14.6742	13.6725	14.0155	13.8212	0.409397
PaF106G0500021313.01	1.11192	0.969867	1.2759	1.14623	0.807949	0.966618	0.190999
PaF106G0700027268.01	218.025	251.316	257.403	317.477	284.335	246.313	0.303182
PaF106G0200008944.01	0	0	0	0	0	0
PaF106G0100002629.01	39.1561	36.6133	38.0677	44.5349	39.3468	37.0549	0.173002
PaF106G0200007573.01	0	0	0	0	0	0
PaF106G0300012796.01	1.20853	0.977823	0.736642	0.196462	0.212962	0.106678	0.560009
PaF106G0400015210.01	0	0	0	0	0	0
PaF106G0500019005.01	0	0	0	0	0	0
PaF106G0400015057.01	0.355919	0.94051	0.674646	0.187017	0.207752	0.424188	0.363122
PaF106G0200010701.01	18.5259	22.0419	20.6804	16.5929	15.66	13.7546	0.509551
PaF106G0100001708.01	2.28552	2.75711	2.46998	7.63229	7.78708	6.41876	0.593597
PaF106G0500019808.01	7.31461	5.93795	5.92124	8.37724	5.82776	6.22102	0.0786449
PaF106G0200009867.01	7.43774	8.07391	7.92021	9.20177	9.63685	9.03832	0.558923
PaF106G0700026057.01	2.46632	3.38838	3.28372	2.30836	1.83325	2.43483	0.413377
PaF106G0800029460.01	0	0	0	0	0	0
PaF106G0400018362.01	11.1661	12.541	12.3303	10.656	10.2009	10.1578	0.501396
PaF106G0400015273.01	20.8876	21.3266	25.4233	24.7035	26.5606	21.7548	0.149107
PaF106G0400014662.01	0	0	0	0	0	0.009497	0.170075
PaF106G0200009865.01	11.5665	9.35682	11.9911	11.8142	13.2871	13.3908	0.342462
PaF106G0700029090.01	0	0	0	0	0	0
PaF106G0700026059.01	13.3937	13.3096	13.3703	9.81819	10.3676	11.6095	0.550625
PaF106G0400018364.01	1.65762	2.16477	3.15067	2.90208	0.998571	3.21905	0.0505081
PaF106G0400016384.01	0	0	0	0	0	0
PaF106G0600023705.01	0.305858	0.041702	0.284544	0	0	0	0.414029
PaF106G0600021841.01	0	0	0	0	0	0
PaF106G0200008942.01	0	0	0	0	0	0
PaF106G0100004219.01	26.6449	26.9514	25.5036	27.2646	24.5652	24.2231	0.162227
PaF106G0600021564.01	0.017201	0.055495	0.067508	0.098115	0.081168	0.037028	0.184084
PaF106G0100001005.01	0.130942	0.289885	0.097117	0.032311	0.328083	0.323856	0.0822536
PaF106G0100006652.01	38.5698	37.0398	35.9727	30.5797	28.5769	26.6956	0.568596
[truncated: 32,057 more rows]
