# Supplementary material for: Mining for genes related to pistil abortion in Prunus sibirica L
Source: PeerJ. 2022 Nov 15;10:e14366. doi: 10.7717/peerj.14366 (PMC9673769; doi:10.7717/peerj.14366)
Supplement: Table S7 [file peerj-10-14366-s007.xls]

## Sheet: Sheet1
Table S7 Detailed information of DEGs in GO enrichment analysis
#ID	NPt1_Count	NPt2_Count	NPt3_Count	APt1_Count	APt2_Count	APt3_Count	NPt1_FPKM	NPt2_FPKM	NPt3_FPKM	APt1_FPKM	APt2_FPKM	APt3_FPKM	FDR	log2FC	regulated	COG_class	COG_class_annotation	GO_annotation	KEGG_annotation	KEGG_pathway_annotation	KOG_class	KOG_class_annotation	Pfam_annotation	Swiss-Prot_annotation	eggNOG_class	eggNOG_class_annotation	NR_annotation
PaF106G0800031314.01	393	320	405	44	45	45	6.50247	6.62036	6.87316	0.851778	0.990911	0.794143	5.55393e-43	-2.72943	down	--	--	Cellular Component: nucleolus (GO:0005730);; Biological Process: rRNA processing (GO:0006364);; Cellular Component: small-subunit processome (GO:0032040);;	K14769|4.4e-68|pavi:110746543|K14769 U3 small nucleolar RNA-associated protein 11 | (RefSeq) probable U3 small nucleolar RNA-associated protein 11	--	[S]	Function unknown	Utp11 protein	Probable U3 small nucleolar RNA-associated protein 11 OS=Oryza sativa subsp. japonica OX=39947 GN=Os01g0810000 PE=2 SV=2	S	Function unknown	unnamed protein product [Prunus armeniaca]
PaF106G0700027016.01	22	27	33	88	78	73	0.266215	0.397679	0.416824	1.19332	1.12959	0.902823	4.31963e-05	1.29521	up	[IQ]	Lipid transport and metabolism;; Secondary metabolites biosynthesis, transport and catabolism	Molecular Function: catalytic activity (GO:0003824);;	K23618|4.3e-138|mus:103972138|K23618 acyl-activating enzyme 11/12 [EC:6.2.1.2 6.2.1.-] | (RefSeq) butyrate--CoA ligase AAE11, peroxisomal-like	--	[I]	Lipid transport and metabolism	AMP-binding enzyme	Probable acyl-activating enzyme 1, peroxisomal OS=Arabidopsis thaliana OX=3702 GN=AAE1 PE=2 SV=1	I	Lipid transport and metabolism	probable acyl-activating enzyme 1, peroxisomal [Prunus dulcis]
PaF106G0400016848.01	133	105	55	16	23	34	1.15473	0.913665	0.381922	0.116929	0.176981	0.233678	2.33086e-05	-1.43747	down	--	--	Cellular Component: integral component of membrane (GO:0016021);;	K13466|1.0e-57|mdm:103439827|K13466 EIX receptor 1/2 | (RefSeq) receptor-like protein EIX2	Plant-pathogen interaction (ko04626)	--	--	Leucine rich repeat	Receptor-like protein 1 OS=Arabidopsis thaliana OX=3702 GN=RLP1 PE=2 SV=2	Q	Secondary metabolites biosynthesis, transport and catabolism	LRR receptor-like serine/threonine-protein kinase GSO1 [Prunus persica]
PaF106G0200007392.01	23	18	20	59	92	49	0.842653	0.755686	0.757023	2.37674	3.95924	1.8141	0.000129447	1.33535	up	--	--	Molecular Function: monooxygenase activity (GO:0004497);; Molecular Function: iron ion binding (GO:0005506);; Biological Process: sterol metabolic process (GO:0016125);; Molecular Function: oxidoreductase activity (GO:0016491);; Molecular Function: oxidoreductase activity, acting on paired donors, with incorporation or reduction of molecular oxygen (GO:0016705);; Molecular Function: heme binding …	--	--	--	--	--	--	Q	Secondary metabolites biosynthesis, transport and catabolism	hypothetical protein PRUPE_2G045900 [Prunus persica]
PaF106G0800030081.01	5860	4418	4509	1196	1135	977	89.1933	80.4833	70.8888	19.1251	19.2991	14.36	5.56432e-55	-1.98937	down	[R]	General function prediction only	Molecular Function: alcohol dehydrogenase activity, zinc-dependent (GO:0004024);; Cellular Component: cytosol (GO:0005829);; Molecular Function: zinc ion binding (GO:0008270);; Biological Process: formaldehyde catabolic process (GO:0046294);; Molecular Function: S-(hydroxymethyl)glutathione dehydrogenase activity (GO:0051903);;	K18857|1.2e-137|pper:18766308|K18857 alcohol dehydrogenase class-P [EC:1.1.1.1] | (RefSeq) alcohol dehydrogenase	Glycolysis / Gluconeogenesis (ko00010);; Fatty acid degradation (ko00071);; Tyrosine metabolism (ko00350);; alpha-Linolenic acid metabolism (ko00592)	[Q]	Secondary metabolites biosynthesis, transport and catabolism	Alcohol dehydrogenase GroES-like domain	Alcohol dehydrogenase OS=Malus domestica OX=3750 GN=ADH PE=2 SV=1	Q	Secondary metabolites biosynthesis, transport and catabolism	unnamed protein product [Prunus armeniaca]
PaF106G0400016036.01	0	0	0	82	58	46	0	0	0	4.04113	3.04975	2.09193	5.67728e-17	3.10266	up	--	--	Biological Process: reproduction (GO:0000003);; Biological Process: response to reactive oxygen species (GO:0000302);; Biological Process: response to acid chemical (GO:0001101);; Biological Process: developmental process involved in reproduction (GO:0003006);; Cellular Component: cellular_component (GO:0005575);; Cellular Component: extracellular region (GO:0005576);; Cellular Component: extrace…	--	--	--	--	Stigma-specific protein, Stig1	Protein GRIM REAPER OS=Arabidopsis thaliana OX=3702 GN=GRI PE=1 SV=1	S	Function unknown	unnamed protein product [Prunus armeniaca]
PaF106G0600023237.01	217	254	281	513	601	709	1.67718	2.34926	2.24234	4.31567	5.4237	5.4951	1.78125e-14	1.2822	up	[T]	Signal transduction mechanisms	Biological Process: defense response (GO:0006952);; Molecular Function: ADP binding (GO:0043531);;	K13457|2.5e-114|qsu:111992130|K13457 disease resistance protein RPM1 | (RefSeq) disease resistance protein RPM1-like	Plant-pathogen interaction (ko04626)	[T]	Signal transduction mechanisms	NB-ARC domain	Putative disease resistance protein At1g50180 OS=Arabidopsis thaliana OX=3702 GN=At1g50180 PE=3 SV=2	T	Signal transduction mechanisms	PREDICTED: probable disease resistance RPP8-like protein 2 [Prunus mume]
PaF106G0100006458.01	46	32	33	150	210	235	0.67071	0.560371	0.490804	2.38729	3.58056	3.42848	1.92403e-18	2.18811	up	--		Molecular Function: transmembrane receptor protein serine/threonine kinase activity (GO:0004675);; Molecular Function: receptor binding (GO:0005102);; Molecular Function: ATP binding (GO:0005524);;	K13416|1.6e-189|pper:18792858|K13416 brassinosteroid insensitive 1-associated receptor kinase 1 [EC:2.7.10.1 2.7.11.1] | (RefSeq) BRASSINOSTEROID INSENSITIVE 1-associated receptor kinase 1	MAPK signaling pathway - plant (ko04016);; Plant hormone signal transduction (ko04075);; Plant-pathogen interaction (ko04626)	[T]	Signal transduction mechanisms	Protein kinase domain	BRASSINOSTEROID INSENSITIVE 1-associated receptor kinase 1 OS=Arabidopsis thaliana OX=3702 GN=BAK1 PE=1 SV=2	T	Signal transduction mechanisms	BRASSINOSTEROID INSENSITIVE 1-associated receptor kinase 1-like [Prunus dulcis]
PaF106G0300012796.01	14	12	7	74	56	50	0.196462	0.212962	0.106678	1.20853	0.977823	0.736642	7.09527e-07	1.75758	up	[E]	Amino acid transport and metabolism	Molecular Function: protein kinase activity (GO:0004672);; Molecular Function: protein serine/threonine kinase activity (GO:0004674);; Molecular Function: ATP binding (GO:0005524);;	K06272|7.4e-172|pper:18782708|K06272 integrin-linked kinase [EC:2.7.11.1] | (RefSeq) serine/threonine-protein kinase STY8	--	[T]	Signal transduction mechanisms	Protein tyrosine and serine/threonine kinase	Integrin-linked protein kinase 1 OS=Arabidopsis thaliana OX=3702 GN=ILK1 PE=1 SV=1	T	Signal transduction mechanisms	serine/threonine-protein kinase STY8 [Prunus persica]
PaF106G0200010874.01	8	12	20	57	87	115	0.108567	0.192998	0.280493	0.863532	1.49518	1.62176	6.59901e-09	1.97976	up	[R]	General function prediction only	Biological Process: oxidation-reduction process (GO:0055114);;	K00121|3.4e-201|pavi:110758566|K00121 S-(hydroxymethyl)glutathione dehydrogenase / alcohol dehydrogenase [EC:1.1.1.284 1.1.1.1] | (RefSeq) alcohol dehydrogenase-like 1	Glycolysis / Gluconeogenesis (ko00010);; Fatty acid degradation (ko00071);; Tyrosine metabolism (ko00350);; Carbon metabolism (ko01200)	[Q]	Secondary metabolites biosynthesis, transport and catabolism	Alcohol dehydrogenase GroES-like domain	CYP enzymes assisting alcohol dehydrogenase OS=Catharanthus roseus OX=4058 GN=CYPADH PE=1 SV=1	Q	Secondary metabolites biosynthesis, transport and catabolism	unnamed protein product [Prunus armeniaca]
PaF106G0400016209.01	452	551	649	233	205	245	5.39297	7.88414	8.15251	3.09882	2.92307	3.0266	8.22649e-10	-1.1248	down	[J]	Translation, ribosomal structure and biogenesis	Molecular Function: ATP binding (GO:0005524);; Cellular Component: mitochondrion (GO:0005739);; Biological Process: tRNA modification (GO:0006400);; Biological Process: cytokinin biosynthetic process (GO:0009691);; Molecular Function: tRNA dimethylallyltransferase activity (GO:0052381);;	K00791|1.7e-252|pper:18778576|K00791 tRNA dimethylallyltransferase [EC:2.5.1.75] | (RefSeq) tRNA dimethylallyltransferase 9 isoform X1	Zeatin biosynthesis (ko00908)	[J]	Translation, ribosomal structure and biogenesis	IPP transferase	tRNA dimethylallyltransferase 9 OS=Arabidopsis thaliana OX=3702 GN=IPT9 PE=2 SV=1	J	Translation, ribosomal structure and biogenesis	unnamed protein product [Prunus armeniaca]
PaF106G0300013919.01	179	184	200	626	466	614	0.765752	0.941558	0.881564	2.91875	2.33045	2.63258	4.09646e-23	1.59766	up	[V]	Defense mechanisms	Molecular Function: ATP binding (GO:0005524);; Cellular Component: integral component of membrane (GO:0016021);; Molecular Function: ATPase activity (GO:0016887);;	K08712|5.0e-144|gsl:Gasu_29800|K08712 ATP-binding cassette, subfamily G (WHITE), member 2, SNQ2 | (RefSeq) ABC transporter, ATP-binding protein	ABC transporters (ko02010)	[Q]	Secondary metabolites biosynthesis, transport and catabolism	ABC-2 type transporter	ABC transporter G family member 36 OS=Arabidopsis thaliana OX=3702 GN=ABCG36 PE=1 SV=1	Q	Secondary metabolites biosynthesis, transport and catabolism	unnamed protein product [Prunus armeniaca]
Prunus_sibirica_newGene_1590	330	312	306	2	0	0	3.04192	3.44267	2.91084	0.013919	0	0	3.80475e-67	-5.30061	down	[X]	Mobilome: prophages, transposons	Molecular Function: nucleic acid binding (GO:0003676);; Biological Process: DNA integration (GO:0015074);;	K11593|6.2e-64|dct:110097550|K11593 eukaryotic translation initiation factor 2C | (RefSeq) protein argonaute 1A-like	--	[R]	General function prediction only	GAG-pre-integrase domain	Retrovirus-related Pol polyprotein from transposon RE2 OS=Arabidopsis thaliana OX=3702 GN=RE2 PE=4 SV=1	L	Replication, recombination and repair	RmlC-like cupins superfamily protein [Prunus dulcis]
PaF106G0200007289.01	1455	1279	1326	189	182	234	5.39347	5.66923	5.05029	0.869916	0.81294	0.94767	2.36283e-111	-2.59478	down	[R]	General function prediction only	Molecular Function: ADP binding (GO:0043531);;	K12818|4.3e-197|mtr:MTR_0267s0070|K12818 ATP-dependent RNA helicase DHX8/PRP22 [EC:3.6.4.13] | (RefSeq) NB-ARC domain disease resistance protein, putative	Spliceosome (ko03040)	[T]	Signal transduction mechanisms	NB-ARC domain	Putative disease resistance RPP13-like protein 1 OS=Arabidopsis thaliana OX=3702 GN=RPPL1 PE=3 SV=1	T	Signal transduction mechanisms	PREDICTED: LOW QUALITY PROTEIN: putative disease resistance RPP13-like protein 1 [Prunus mume]
PaF106G0600023521.01	76	82	76	0	0	0	0.910981	1.17366	0.933464	0	0	0	1.61824e-21	-3.44115	down	--	--	Molecular Function: nucleic acid binding (GO:0003676);; Biological Process: DNA integration (GO:0015074);;	--	--	--	--	--	--	--	--	hypothetical protein Prudu_93S000100 [Prunus dulcis]
PaF106G0600024398.01	1962	1805	1846	4014	3149	4114	21.317	23.7977	21.0144	47.7982	40.1533	44.9576	2.10701e-28	1.0704	up	--	--	Biological Process: microtubule cytoskeleton organization (GO:0000226);; Cellular Component: cellular_component (GO:0005575);; Cellular Component: intracellular (GO:0005622);; Cellular Component: cell (GO:0005623);; Cellular Component: nucleus (GO:0005634);; Cellular Component: cytoplasm (GO:0005737);; Cellular Component: cytoskeleton (GO:0005856);; Cellular Component: microtubule (GO:0005874);; …	--	--	--	--	--	Interactor of constitutive active ROPs 2, chloroplastic OS=Arabidopsis thaliana OX=3702 GN=ICR2 PE=1 SV=1	S	Function unknown	unnamed protein product [Prunus armeniaca]
PaF106G0600025015.01	170	148	232	368	363	494	6.52429	6.80281	9.20745	15.422	16.2905	19.049	5.55108e-10	1.15734	up	--	--	Biological Process: lipid transport (GO:0006869);; Molecular Function: lipid binding (GO:0008289);;	--	--	--	--	Protease inhibitor/seed storage/LTP family	Non-specific lipid-transfer protein 1 OS=Prunus dulcis OX=3755 PE=3 SV=1	T	Signal transduction mechanisms	unnamed protein product [Prunus armeniaca]
PaF106G0300012271.01	163	98	156	42	42	25	5.9873	4.3195	5.93916	1.66987	1.79986	0.957193	4.89932e-07	-1.48687	down	--	--	Molecular Function: molecular_function (GO:0003674);; Molecular Function: binding (GO:0005488);; Cellular Component: cellular_component (GO:0005575);; Cellular Component: intracellular (GO:0005622);; Cellular Component: cell (GO:0005623);; Cellular Component: cytoplasm (GO:0005737);; Biological Process: transport (GO:0006810);; Biological Process: ion transport (GO:0006811);; Biological Process: …	--	--	--	--	--	--	L	Replication, recombination and repair	hypothetical protein Pyn_36081 [Prunus yedoensis var. nudiflora]
PaF106G0700027064.01	556	487	354	50	61	48	10.9354	11.4542	7.17888	1.06159	1.37844	0.946275	4.64282e-36	-2.74062	down	--	--	Molecular Function: peroxidase activity (GO:0004601);; Cellular Component: extracellular region (GO:0005576);; Biological Process: response to oxidative stress (GO:0006979);; Molecular Function: heme binding (GO:0020037);; Biological Process: hydrogen peroxide catabolic process (GO:0042744);; Molecular Function: metal ion binding (GO:0046872);;	K00430|1.6e-177|pavi:110758377|K00430 peroxidase [EC:1.11.1.7] | (RefSeq) peroxidase 64	Phenylpropanoid biosynthesis (ko00940)	--	--	Peroxidase	Peroxidase 64 OS=Arabidopsis thaliana OX=3702 GN=PER64 PE=1 SV=1	Q	Secondary metabolites biosynthesis, transport and catabolism	unnamed protein product [Prunus armeniaca]
PaF106G0500021188.01	0	0	0	56	62	86	0	0	0	1.2151	1.44824	1.72401	3.40877e-20	3.35075	up	--	--	Molecular Function: S-adenosylmethionine-dependent methyltransferase activity (GO:0008757);; Biological Process: methylation (GO:0032259);;	K08241|1.2e-18|fve:101301186|K08241 jasmonate O-methyltransferase [EC:2.1.1.141] | (RefSeq) jasmonate O-methyltransferase-like	alpha-Linolenic acid metabolism (ko00592)	--	--	SAM dependent carboxyl methyltransferase	Loganic acid O-methyltransferase OS=Catharanthus roseus OX=4058 GN=LAMT PE=1 SV=1	S	Function unknown	loganic acid O-methyltransferase-like [Prunus dulcis]
PaF106G0700026911.01	6258	4052	4762	1860	2178	2074	70.1675	52.9463	54.0149	23.0251	28.8982	23.0245	2.77831e-22	-1.16371	down	--	--	Cellular Component: integral component of membrane (GO:0016021);; Biological Process: transmembrane transport (GO:0055085);;	K24139|4.2e-226|pmum:103340458|K24139 auxin efflux carrier family protein | (RefSeq) uncharacterized transporter YBR287W	--	[S]	Function unknown	Membrane transport protein	Protein PIN-LIKES 5 OS=Arabidopsis thaliana OX=3702 GN=PILS5 PE=2 SV=1	S	Function unknown	unnamed protein product [Prunus armeniaca]
PaF106G0800030406.01	1361	1497	1539	3272	3015	3741	5.50488	7.78028	6.81683	17.4766	17.7351	18.4319	9.13376e-32	1.23928	up	[R]	General function prediction only	Biological Process: signal transduction (GO:0007165);; Molecular Function: ADP binding (GO:0043531);;	K00695|1.1e-98|mtr:MTR_6g478030|K00695 sucrose synthase [EC:2.4.1.13] | (RefSeq) sucrose synthase	Starch and sucrose metabolism (ko00500)	--	--	NB-ARC domain	Disease resistance protein Roq1 OS=Nicotiana benthamiana OX=4100 GN=ROQ1 PE=1 SV=1	T	Signal transduction mechanisms	PREDICTED: uncharacterized protein LOC103334707 [Prunus mume]
PaF106G0600022981.01	132	77	81	6	9	15	8.26177	5.71807	5.22156	0.343718	0.633342	0.924498	2.75855e-12	-2.31733	down	--	--	Biological Process: phototropism (GO:0009638);;	--	--	--	--	NPH3 family	Root phototropism protein 2 OS=Arabidopsis thaliana OX=3702 GN=RPT2 PE=1 SV=2	S	Function unknown	hypothetical protein PRUPE_6G039200 [Prunus persica]
PaF106G0100000431.01	371	499	432	138	88	186	2.51932	4.05273	3.01968	1.01407	0.695249	1.26062	1.04003e-10	-1.45524	down	[KL]	Transcription;; Replication, recombination and repair	Molecular Function: nucleic acid binding (GO:0003676);; Molecular Function: ATP binding (GO:0005524);; Molecular Function: zinc ion binding (GO:0008270);; Molecular Function: hydrolase activity, acting on acid anhydrides, in phosphorus-containing anhydrides (GO:0016818);;	K15505|0.0e+00|pmum:103324215|K15505 DNA repair protein RAD5 [EC:3.6.4.-] | (RefSeq) putative SWI/SNF-related matrix-associated actin-dependent regulator of chromatin subfamily A member 3-like 3	--	[KL]	Transcription;; Replication, recombination and repair	SNF2 family N-terminal domain	DNA repair protein RAD5B OS=Arabidopsis thaliana OX=3702 GN=RAD5B PE=3 SV=1	--	--	unnamed protein product [Prunus armeniaca]
Prunus_sibirica_newGene_527	498	546	541	68	21	53	6.11311	7.22956	6.3674	0.908814	0.197256	0.454606	4.33478e-35	-2.98795	down	--	--	Cellular Component: integral component of membrane (GO:0016021);;	K08507|4.3e-15|pper:18786079|K08507 unconventional SNARE in the endoplasmic reticulum protein 1 | (RefSeq) uncharacterized protein LOC18786079 isoform X2	SNARE interactions in vesicular transport (ko04130)	--	--	--	--	S	Function unknown	unnamed protein product [Prunus armeniaca]
PaF106G0400017987.01	72	80	74	429	304	524	0.584305	0.773602	0.617077	3.81083	2.89561	4.28041	3.1563e-31	2.33716	up	[M]	Cell wall/membrane/envelope biogenesis	Molecular Function: protein serine/threonine kinase activity (GO:0004674);; Molecular Function: ATP binding (GO:0005524);; Cellular Component: integral component of membrane (GO:0016021);; Biological Process: recognition of pollen (GO:0048544);;	K24104|9.3e-82|thj:104799061|K24104 GPN-loop GTPase | (RefSeq) LOW QUALITY PROTEIN: uncharacterized protein LOC104799061	--	--	--	Protein tyrosine and serine/threonine kinase	G-type lectin S-receptor-like serine/threonine-protein kinase At1g11410 OS=Arabidopsis thaliana OX=3702 GN=At1g11410 PE=3 SV=3	T	Signal transduction mechanisms	unnamed protein product [Prunus armeniaca]
PaF106G0500020058.01	200	195	84	3	0	0	2.43409	2.84376	1.05793	0.034503	0	0	2.80861e-28	-3.84225	down	--	--	Molecular Function: protein binding (GO:0005515);;	--	--	--	--	Protein of unknown function (DUF4005)	Protein IQ-DOMAIN 1 OS=Arabidopsis thaliana OX=3702 GN=IQD1 PE=1 SV=1	S	Function unknown	unnamed protein product [Prunus armeniaca]
PaF106G0200008532.01	1855	1501	1497	605	566	919	28.5212	27.6072	23.7355	10.119	10.1542	14.1468	4.34981e-17	-1.10591	down	--	--	Molecular Function: DNA binding (GO:0003677);; Cellular Component: nucleus (GO:0005634);; Cellular Component: host cell nucleus (GO:0042025);; Molecular Function: metal ion binding (GO:0046872);;	K22366|8.4e-12|pxb:103948817|K22366 thioredoxin reductase-like selenoprotein T | (RefSeq) selT-like protein	--	--	--	SBP domain	Squamosa promoter-binding-like protein 8 OS=Arabidopsis thaliana OX=3702 GN=SPL8 PE=1 SV=2	S	Function unknown	squamosa promoter-binding-like protein 8 [Prunus dulcis]
PaF106G0200010724.01	249	189	333	472	577	623	6.52032	5.93042	8.98466	13.4609	17.6409	16.3559	1.23744e-09	1.13373	up	[CI]	Energy production and conversion;; Lipid transport and metabolism	Cellular Component: vacuolar membrane (GO:0005774);; Cellular Component: endoplasmic reticulum (GO:0005783);; Cellular Component: plasma membrane (GO:0005886);; Molecular Function: electron carrier activity (GO:0009055);; Cellular Component: chloroplast thylakoid membrane (GO:0009535);; Cellular Component: membrane (GO:0016020);; Cellular Component: integral component of membrane (GO:0016021);; M…	K23490|8.3e-51|pmum:103333591|K23490 cytochrome b5 | (RefSeq) cytochrome b5	--	[C]	Energy production and conversion	Cytochrome b5-like Heme/Steroid binding domain	Cytochrome b5 OS=Brassica oleracea var. botrytis OX=3715 GN=CYB5 PE=1 SV=1	C	Energy production and conversion	PREDICTED: cytochrome b5 [Prunus mume]
PaF106G0200010567.01	329	325	299	97	120	125	3.26452	3.82378	3.08267	1.02562	1.4064	1.2526	1.28067e-11	-1.29978	down	--	--	Molecular Function: chromatin binding (GO:0003682);; Molecular Function: DNA-directed DNA polymerase activity (GO:0003887);; Molecular Function: DNA primase activity (GO:0003896);; Cellular Component: nucleus (GO:0005634);; Cellular Component: mitochondrial matrix (GO:0005759);; Biological Process: mitochondrial DNA replication (GO:0006264);; Biological Process: response to UV (GO:0009411);; Biol…	K22761|6.2e-216|pmum:103333714|K22761 DNA-directed primase/polymerase protein [EC:2.7.7.102 2.7.7.7] | (RefSeq) DNA-directed primase/polymerase protein	--	--	--	Herpesviridae UL52/UL70 DNA primase	--	S	Function unknown	unnamed protein product [Prunus armeniaca]
PaF106G0200008335.01	208	194	235	77	107	90	2.85306	3.1948	3.32873	1.14365	1.71737	1.23501	9.84812e-06	-1.01507	down	[QV]	Secondary metabolites biosynthesis, transport and catabolism;; Defense mechanisms	Molecular Function: monooxygenase activity (GO:0004497);; Molecular Function: iron ion binding (GO:0005506);; Cellular Component: integral component of membrane (GO:0016021);; Molecular Function: oxidoreductase activity, acting on paired donors, with incorporation or reduction of molecular oxygen (GO:0016705);; Molecular Function: heme binding (GO:0020037);;	K20661|1.9e-70|nnu:104612956|K20661 cytochrome P450 family 714 subfamily A polypeptide 1 | (RefSeq) cytochrome P450 714A1-like	--	[QI]	Secondary metabolites biosynthesis, transport and catabolism;; Lipid transport and metabolism	Cytochrome P450	Cytochrome P450 714C2 OS=Oryza sativa subsp. japonica OX=39947 GN=CYP714C2 PE=2 SV=1	Q	Secondary metabolites biosynthesis, transport and catabolism	unnamed protein product [Prunus armeniaca]
PaF106G0800030917.01	239	131	158	354	362	418	3.23797	2.12797	2.20251	5.23316	5.73523	5.67868	3.11998e-09	1.12604	up	[M]	Cell wall/membrane/envelope biogenesis	Molecular Function: catalytic activity (GO:0003824);; Cellular Component: integral component of membrane (GO:0016021);;	K22419|6.6e-229|pper:18768093|K22419 Delta4-3-oxosteroid 5beta-reductase [EC:1.3.1.3] | (RefSeq) 3-oxo-Delta(4,5)-steroid 5-beta-reductase	--	--	--	--	(S)-8-oxocitronellyl enol synthase CYC2 OS=Camptotheca acuminata OX=16922 GN=CYC2 PE=1 SV=1	S	Function unknown	unnamed protein product [Prunus armeniaca]
PaF106G0100004891.01	618	471	573	1082	1126	1448	8.75966	7.75415	8.68185	16.6524	18.6659	20.3311	5.11327e-27	1.19536	up	[EH]	Amino acid transport and metabolism;; Coenzyme transport and metabolism	Biological Process: branched-chain amino acid biosynthetic process (GO:0009082);; Molecular Function: L-leucine transaminase activity (GO:0052654);; Molecular Function: L-valine transaminase activity (GO:0052655);; Molecular Function: L-isoleucine transaminase activity (GO:0052656);;	K00826|2.5e-98|pmum:103320512|K00826 branched-chain amino acid aminotransferase [EC:2.6.1.42] | (RefSeq) branched-chain-amino-acid aminotransferase 2, chloroplastic-like isoform X1	Cysteine and methionine metabolism (ko00270);; Valine, leucine and isoleucine degradation (ko00280);; Valine, leucine and isoleucine biosynthesis (ko00290);; Pantothenate and CoA biosynthesis (ko00770);; Glucosinolate biosynthesis (ko00966);; 2-Oxocarboxylic acid metabolism (ko01210);; Biosynthesis of amino acids (ko01230)	[E]	Amino acid transport and metabolism	--	Branched-chain-amino-acid aminotransferase 2, chloroplastic OS=Arabidopsis thaliana OX=3702 GN=BCAT2 PE=1 SV=1	E	Amino acid transport and metabolism	unnamed protein product [Prunus armeniaca]
PaF106G0100000148.01	514	392	435	1050	937	1182	1.94308	1.80325	1.72408	4.93327	4.93513	5.3385	7.64311e-32	1.29947	up	--	--	Biological Process: defense response (GO:0006952);; Molecular Function: ADP binding (GO:0043531);;	--	--	--	--	Rx N-terminal domain	--	T	Signal transduction mechanisms	PREDICTED: disease resistance protein RGA2-like [Prunus mume]
PaF106G0600023791.01	57	75	97	176	183	225	0.801217	1.28119	1.42043	2.7376	3.05086	3.20885	2.847e-07	1.26112	up	--	--	Biological Process: protein glycosylation (GO:0006486);; Cellular Component: integral component of membrane (GO:0016021);; Molecular Function: transferase activity, transferring glycosyl groups (GO:0016757);;	K20888|5.2e-262|pmum:103332876|K20888 xyloglucan galactosyltransferase MUR3 [EC:2.4.1.-] | (RefSeq) probable xyloglucan galactosyltransferase GT17	--	[GMW]	Carbohydrate transport and metabolism;; Cell wall/membrane/envelope biogenesis;; Extracellular structures	Exostosin family	Probable xyloglucan galactosyltransferase GT17 OS=Arabidopsis thaliana OX=3702 GN=GT17 PE=2 SV=1	--	--	PREDICTED: probable xyloglucan galactosyltransferase GT17 [Prunus mume]
PaF106G0600021550.01	693	634	671	29	27	31	8.37294	9.1498	8.42888	0.372451	0.370259	0.362104	3.24157e-105	-4.10218	down	[EF]	Amino acid transport and metabolism;; Nucleotide transport and metabolism	Molecular Function: carbamoyl-phosphate synthase (glutamine-hydrolyzing) activity (GO:0004088);; Cellular Component: cytoplasm (GO:0005737);; Cellular Component: carbamoyl-phosphate synthase complex (GO:0005951);; Biological Process: 'de novo' pyrimidine nucleobase biosynthetic process (GO:0006207);; Biological Process: arginine biosynthetic process (GO:0006526);; Biological Process: glutamine me…	K01956|8.1e-249|pmum:103341837|K01956 carbamoyl-phosphate synthase small subunit [EC:6.3.5.5] | (RefSeq) carbamoyl-phosphate synthase small chain, chloroplastic-like	Pyrimidine metabolism (ko00240);; Alanine, aspartate and glutamate metabolism (ko00250)	[R]	General function prediction only	Carbamoyl-phosphate synthase small chain, CPSase domain	Carbamoyl-phosphate synthase small chain, chloroplastic OS=Arabidopsis thaliana OX=3702 GN=CARA PE=1 SV=1	--	--	PREDICTED: carbamoyl-phosphate synthase small chain, chloroplastic-like [Prunus mume]
PaF106G0100002768.01	10	9	13	317	276	317	0.31741	0.330018	0.445253	11.5246	10.7478	10.5986	9.38194e-61	4.159	up	--	--	Molecular Function: nucleic acid binding (GO:0003676);;	--	--	--	--	--	--	--	--	unnamed protein product [Prunus armeniaca]
PaF106G0100001892.01	1111	920	880	2618	2430	3093	6.16377	6.159	5.10497	15.5932	15.5523	16.9444	1.88838e-60	1.54232	up	--	--	Biological Process: defense response (GO:0006952);; Molecular Function: ADP binding (GO:0043531);;	K15078|4.8e-107|tcc:18614561|K15078 structure-specific endonuclease subunit SLX1 [EC:3.6.1.-] | (RefSeq) putative disease resistance protein RGA3	--	[T]	Signal transduction mechanisms	NB-ARC domain	Putative disease resistance protein RGA3 OS=Solanum bulbocastanum OX=147425 GN=RGA3 PE=2 SV=2	T	Signal transduction mechanisms	PREDICTED: putative disease resistance [Prunus dulcis]
PaF106G0800032004.01	1230	930	1057	3244	2840	3310	8.40559	7.60005	7.45059	24.1304	22.6564	22.6467	6.02743e-71	1.61458	up	[P]	Inorganic ion transport and metabolism	Molecular Function: potassium ion transmembrane transporter activity (GO:0015079);; Cellular Component: integral component of membrane (GO:0016021);;	K03549|3.2e-273|tcc:18609410|K03549 KUP system potassium uptake protein | (RefSeq) putative potassium transporter 12	--	--	--	K+ potassium transporter	Potassium transporter 7 OS=Arabidopsis thaliana OX=3702 GN=POT7 PE=1 SV=2	P	Inorganic ion transport and metabolism	PREDICTED: potassium transporter 7 [Prunus mume]
PaF106G0200008577.01	444	454	431	220	166	207	7.87573	9.33089	7.97477	5.05195	3.97966	4.41582	2.09235e-09	-1.02581	down	--	--	Biological Process: chromosome segregation (GO:0007059);; Molecular Function: microtubule binding (GO:0008017);; Biological Process: cell division (GO:0051301);;	K08341|5.9e-36|han:110930598|K08341 GABA(A) receptor-associated protein | (RefSeq) autophagy-related protein 8D-like	Autophagy - other (ko04136)	[S]	Function unknown	Spindle and kinetochore-associated protein 1	Spindle and kinetochore-associated protein 1 homolog OS=Arabidopsis thaliana OX=3702 GN=At3g60660 PE=2 SV=1	S	Function unknown	unnamed protein product [Prunus armeniaca]
PaF106G0300012159.01	2738	1998	2357	0	0	6	90.7273	79.2414	80.5704	0	0	0.173495	1.38886e-210	-7.75456	down	--	--	Molecular Function: polygalacturonase activity (GO:0004650);; Cellular Component: extracellular region (GO:0005576);; Biological Process: carbohydrate metabolic process (GO:0005975);; Biological Process: cell wall organization (GO:0071555);;	K01213|1.8e-76|pmum:103329198|K01213 galacturan 1,4-alpha-galacturonidase [EC:3.2.1.67] | (RefSeq) exopolygalacturonase-like	Pentose and glucuronate interconversions (ko00040)	--	--	Glycosyl hydrolases family 28	Exopolygalacturonase (Fragment) OS=Oenothera organensis OX=3945 PE=2 SV=1	G	Carbohydrate transport and metabolism	PREDICTED: exopolygalacturonase-like [Prunus mume]
PaF106G0600024884.01	85	94	70	357	363	505	0.501087	0.669559	0.425906	2.3166	2.6225	3.08535	6.28624e-30	2.19424	up	--	--	Cellular Component: integral component of membrane (GO:0016021);;	K13466|2.4e-13|spen:107024367|K13466 EIX receptor 1/2 | (RefSeq) receptor-like protein EIX2	Plant-pathogen interaction (ko04626)	[R]	General function prediction only	Leucine rich repeat	Receptor-like protein 6 OS=Arabidopsis thaliana OX=3702 GN=RLP6 PE=3 SV=1	S	Function unknown	PREDICTED: receptor-like protein 12 isoform X1 [Prunus mume]
PaF106G0500018894.01	3	0	0	206	173	227	0.032455	0	0	3.60647	3.25742	3.66482	6.86474e-51	4.74799	up	[J]	Translation, ribosomal structure and biogenesis	Molecular Function: tyrosine-tRNA ligase activity (GO:0004831);; Molecular Function: ATP binding (GO:0005524);; Biological Process: tRNA aminoacylation for protein translation (GO:0006418);;	K01866|4.6e-211|pavi:110768363|K01866 tyrosyl-tRNA synthetase [EC:6.1.1.1] | (RefSeq) tyrosine--tRNA ligase 1, cytoplasmic-like	Aminoacyl-tRNA biosynthesis (ko00970)	[J]	Translation, ribosomal structure and biogenesis	tRNA synthetases class I (W and Y)	Tyrosine--tRNA ligase 1, cytoplasmic OS=Arabidopsis thaliana OX=3702 GN=At2g33840 PE=2 SV=1	J	Translation, ribosomal structure and biogenesis	unnamed protein product [Prunus armeniaca]
PaF106G0800029849.01	23	49	48	106	112	94	0.447345	1.15972	0.975355	2.31826	2.62491	1.8781	0.000372758	1.1481	up	[Q]	Secondary metabolites biosynthesis, transport and catabolism	Molecular Function: metal ion binding (GO:0046872);; Molecular Function: dioxygenase activity (GO:0051213);;	K13229|4.3e-75|ats:109766943|K13229 2,4-dihydroxy-1,4-benzoxazin-3-one-glucoside dioxygenase [EC:1.14.11.59] | (RefSeq) LOC109766943; DIBOA-glucoside dioxygenase BX6-like	Benzoxazinoid biosynthesis (ko00402)	[QR]	Secondary metabolites biosynthesis, transport and catabolism;; General function prediction only	2OG-Fe(II) oxygenase superfamily	1-aminocyclopropane-1-carboxylate oxidase homolog 1 OS=Arabidopsis thaliana OX=3702 GN=At1g06620 PE=2 SV=1	Q	Secondary metabolites biosynthesis, transport and catabolism	PREDICTED: 1-aminocyclopropane-1-carboxylate oxidase homolog 1-like [Prunus mume]
PaF106G0700028605.01	49	50	55	14	9	11	2.47687	3.03693	2.89915	0.762793	0.497467	0.529857	5.10613e-05	-1.45335	down	--	--	Molecular Function: transmembrane receptor protein serine/threonine kinase activity (GO:0004675);; Molecular Function: ATP binding (GO:0005524);; Cellular Component: plasma membrane (GO:0005886);; Biological Process: protein phosphorylation (GO:0006468);;	--	--	--	--	--	--	--	--	protein STRUBBELIG-RECEPTOR FAMILY 5-like [Prunus persica]
PaF106G0200007569.01	3924	4653	5091	260	149	260	11.6656	16.5562	15.6602	0.836246	0.513011	0.770295	3.97192e-146	-4.07214	down	--	--	Biological Process: signal transduction (GO:0007165);; Molecular Function: ADP binding (GO:0043531);;	K00695|2.6e-155|mtr:MTR_6g478030|K00695 sucrose synthase [EC:2.4.1.13] | (RefSeq) sucrose synthase	Starch and sucrose metabolism (ko00500)	--	--	TIR domain	TMV resistance protein N OS=Nicotiana glutinosa OX=35889 GN=N PE=1 SV=1	T	Signal transduction mechanisms	PREDICTED: TMV resistance [Prunus dulcis]
PaF106G0400016408.01	330	346	345	69	101	131	5.07492	6.54801	5.55703	1.077	1.7312	1.93481	2.49977e-13	-1.54764	down	[Q]	Secondary metabolites biosynthesis, transport and catabolism	Molecular Function: oxidoreductase activity (GO:0016491);; Molecular Function: metal ion binding (GO:0046872);;	K05658|4.1e-116|cpep:111781709|K05658 ATP-binding cassette, subfamily B (MDR/TAP), member 1 [EC:7.6.2.2] | (RefSeq) uncharacterized protein LOC111781709	ABC transporters (ko02010)	[QR]	Secondary metabolites biosynthesis, transport and catabolism;; General function prediction only	non-haem dioxygenase in morphine synthesis N-terminal	Protein SRG1 OS=Arabidopsis thaliana OX=3702 GN=SRG1 PE=2 SV=1	Q	Secondary metabolites biosynthesis, transport and catabolism	unnamed protein product [Prunus armeniaca]
PaF106G0700027198.01	960	874	984	1802	1607	1972	26.5968	28.9906	28.1343	54.3824	52.0139	54.7397	1.17996e-26	1.00152	up	--	--	Biological Process: response to water (GO:0009415);;	--	--	--	--	Dehydrin	--	S	Function unknown	unnamed protein product [Prunus armeniaca]
PaF106G0100002664.01	325	230	218	0	0	0	3.99195	3.38656	2.75909	0	0	0	1.71426e-56	-5.08924	down	--	--	Biological Process: defense response (GO:0006952);; Molecular Function: ADP binding (GO:0043531);;	K13457|1.8e-53|mtr:MTR_3g055830|K13457 disease resistance protein RPM1 | (RefSeq) disease resistance protein (CC-NBS-LRR class) family protein	Plant-pathogen interaction (ko04626)	[T]	Signal transduction mechanisms	Leucine Rich repeats (2 copies)	Probable disease resistance RPP8-like protein 2 OS=Arabidopsis thaliana OX=3702 GN=RPP8L2 PE=3 SV=1	T	Signal transduction mechanisms	PREDICTED: putative disease resistance protein At1g50180 [Prunus mume]
PaF106G0400017984.01	178	124	130	24	27	34	1.42627	1.18876	1.0769	0.207914	0.244413	0.268543	1.02164e-12	-1.91636	down	--		Molecular Function: protein serine/threonine kinase activity (GO:0004674);; Molecular Function: ATP binding (GO:0005524);; Cellular Component: plasma membrane (GO:0005886);; Biological Process: protein phosphorylation (GO:0006468);; Cellular Component: integral component of membrane (GO:0016021);; Biological Process: recognition of pollen (GO:0048544);;	K24104|2.1e-77|thj:104799061|K24104 GPN-loop GTPase | (RefSeq) LOW QUALITY PROTEIN: uncharacterized protein LOC104799061	--	--	--	Protein tyrosine and serine/threonine kinase	G-type lectin S-receptor-like serine/threonine-protein kinase At1g11410 OS=Arabidopsis thaliana OX=3702 GN=At1g11410 PE=3 SV=3	T	Signal transduction mechanisms	unnamed protein product [Prunus armeniaca]
PaF106G0400015463.01	776	786	860	1568	1620	1898	8.75592	10.5989	9.99558	19.2489	21.3326	21.4387	5.09191e-26	1.12705	up	--	--	Molecular Function: RNA binding (GO:0003723);; Molecular Function: metal ion binding (GO:0046872);;	--	--	--	--	OST-HTH/LOTUS domain	Zinc finger CCCH domain-containing protein 18 OS=Arabidopsis thaliana OX=3702 GN=At2g05160 PE=2 SV=1	A	RNA processing and modification	zinc finger CCCH domain-containing protein 18 isoform X3 [Prunus persica]
PaF106G0600021982.01	472	396	408	821	776	973	3.89012	3.88322	3.44616	7.43355	7.44895	8.16066	8.14828e-21	1.06917	up	[T]	Signal transduction mechanisms	Molecular Function: protein kinase activity (GO:0004672);; Molecular Function: ATP binding (GO:0005524);; Cellular Component: integral component of membrane (GO:0016021);;	K00924|6.9e-35|nto:104090210|K00924 kinase [EC:2.7.1.-] | (RefSeq) receptor-like protein kinase HSL1 isoform X1	--	--	--	Protein tyrosine and serine/threonine kinase	Protein MALE DISCOVERER 2 OS=Arabidopsis thaliana OX=3702 GN=MDIS2 PE=1 SV=1	T	Signal transduction mechanisms	PREDICTED: probable inactive receptor-like protein kinase At3g56050 [Prunus mume]
PaF106G0100006325.01	226	125	178	20	32	30	7.06744	4.7064	5.87036	0.65968	1.24766	0.94562	1.9871e-15	-2.17114	down	--	--	Molecular Function: GTP binding (GO:0005525);; Cellular Component: nucleus (GO:0005634);; Biological Process: ribosome biogenesis (GO:0042254);;	K14569|3.1e-09|cic:CICLE_v10018567mg|K14569 ribosome biogenesis protein BMS1 | (RefSeq) hypothetical protein	Ribosome biogenesis in eukaryotes (ko03008)	--	--	--	--	--	--	hypothetical protein FH972_015221 [Carpinus fangiana]
PaF106G0100000717.01	106	100	75	210	173	199	0.635963	0.721488	0.461912	1.37925	1.21508	1.20401	7.57071e-06	1.02776	up	--		Molecular Function: protein serine/threonine kinase activity (GO:0004674);; Molecular Function: ATP binding (GO:0005524);; Cellular Component: plasma membrane (GO:0005886);; Cellular Component: integral component of membrane (GO:0016021);;	K00924|5.8e-84|smo:SELMODRAFT_165220|K00924 kinase [EC:2.7.1.-] | (RefSeq) hypothetical protein	--	--	--	Leucine rich repeat	Receptor-like protein kinase 2 OS=Arabidopsis thaliana OX=3702 GN=RCH2 PE=1 SV=1	T	Signal transduction mechanisms	receptor-like protein kinase 2 isoform X1 [Prunus avium]
PaF106G0200010064.01	87	98	103	203	176	226	1.12026	1.49845	1.3643	2.84524	2.64426	2.91023	1.15599e-06	1.05056	up	--	--	Cellular Component: integral component of membrane (GO:0016021);;	K14207|5.9e-109|vvi:100264342|K14207 solute carrier family 38 (sodium-coupled neutral amino acid transporter), member 2 | (RefSeq) sodium-coupled neutral amino acid transporter 5	--	[E]	Amino acid transport and metabolism	Transmembrane amino acid transporter protein	Amino acid transporter AVT6C OS=Arabidopsis thaliana OX=3702 GN=AVT6C PE=2 SV=1	E	Amino acid transport and metabolism	unnamed protein product [Prunus armeniaca]
PaF106G0100003882.01	47	55	131	30	7	26	1.84004	2.58991	5.34968	1.25803	0.316775	1.02161	0.00257514	-1.16107	down	--	--	Biological Process: defense response (GO:0006952);;	--	--	--	--	Pathogenesis-related protein Bet v 1 family	MLP-like protein 423 OS=Arabidopsis thaliana OX=3702 GN=MLP423 PE=2 SV=1	--	--	MLP-like protein 328 isoform X2 [Prunus yedoensis var. nudiflora]
PaF106G0800030327.01	329	274	342	125	130	157	4.50354	4.47994	4.824	1.8574	2.07745	2.15349	3.63124e-09	-1.04783	down	[G]	Carbohydrate transport and metabolism	Molecular Function: UDP-glycosyltransferase activity (GO:0008194);;	K13691|2.6e-261|pper:18767225|K13691 pathogen-inducible salicylic acid glucosyltransferase [EC:2.4.1.-] | (RefSeq) UDP-glycosyltransferase 74G1	--	[GC]	Carbohydrate transport and metabolism;; Energy production and conversion	UDP-glucoronosyl and UDP-glucosyl transferase	UDP-glycosyltransferase 74G1 OS=Stevia rebaudiana OX=55670 GN=UGT74G1 PE=1 SV=1	--	--	UDP-glycosyltransferase 74G1-like [Prunus dulcis]
PaF106G0200010293.01	694	712	786	1566	1750	1718	8.6973	11.0444	10.2073	22.0086	25.6047	21.7317	1.11332e-24	1.25221	up	[G]	Carbohydrate transport and metabolism	Molecular Function: trehalose-phosphatase activity (GO:0004805);; Biological Process: trehalose biosynthetic process (GO:0005992);;	K01087|8.9e-226|pavi:110764757|K01087 trehalose 6-phosphate phosphatase [EC:3.1.3.12] | (RefSeq) trehalose-phosphate phosphatase A isoform X1	Starch and sucrose metabolism (ko00500)	[G]	Carbohydrate transport and metabolism	Trehalose-phosphatase	Trehalose-phosphate phosphatase A OS=Arabidopsis thaliana OX=3702 GN=TPPA PE=1 SV=1	G	Carbohydrate transport and metabolism	Haloacid dehalogenase-like hydrolase superfamily protein [Prunus dulcis]
PaF106G0600021617.01	1467	1464	1357	661	498	803	40.1922	47.9885	38.3589	19.7062	15.9021	22.0281	3.06754e-14	-1.02383	down	--	--	Cellular Component: nucleosome (GO:0000786);; Molecular Function: DNA binding (GO:0003677);; Cellular Component: nucleus (GO:0005634);; Molecular Function: protein heterodimerization activity (GO:0046982);;	K11253|1.4e-66|adu:107470357|K11253 histone H3 | (RefSeq) histone H3.2	--	[B]	Chromatin structure and dynamics	Core histone H2A/H2B/H3/H4	Histone H3.2 OS=Arabidopsis thaliana OX=3702 GN=HTR2 PE=1 SV=2	B	Chromatin structure and dynamics	Histone superfamily protein [Theobroma cacao]
PaF106G0100006218.01	29	3	7	148	168	147	0.225773	0.024955	0.05383	1.25765	1.53876	1.15066	2.65607e-14	2.59428	up	--	--	Molecular Function: protein binding (GO:0005515);; Biological Process: biological_process (GO:0008150);; Biological Process: tissue development (GO:0009888);; Biological Process: meristem maintenance (GO:0010073);; Biological Process: multicellular organismal process (GO:0032501);; Biological Process: developmental process (GO:0032502);; Biological Process: meristem development (GO:0048507);; Bio…	--	--	--	--	Leucine rich repeat	--	S	Function unknown	unnamed protein product [Prunus armeniaca]
PaF106G0600025398.01	2089	1725	1891	461	537	593	14.4713	14.2789	13.5055	3.47976	4.37339	4.10066	3.55646e-62	-1.71815	down	--	--	Molecular Function: oxidoreductase activity, acting on single donors with incorporation of molecular oxygen, incorporation of two atoms of oxygen (GO:0016702);; Biological Process: oxylipin biosynthetic process (GO:0031408);; Molecular Function: metal ion binding (GO:0046872);;	K15718|0.0e+00|pmum:103344101|K15718 linoleate 9S-lipoxygenase [EC:1.13.11.58] | (RefSeq) probable linoleate 9S-lipoxygenase 5	Linoleic acid metabolism (ko00591)	--	--	Lipoxygenase	Probable linoleate 9S-lipoxygenase 5 OS=Solanum tuberosum OX=4113 GN=LOX1.5 PE=2 SV=1	E	Amino acid transport and metabolism	PREDICTED: probable linoleate 9S-lipoxygenase 5 [Prunus mume]
PaF106G0700028234.01	131	89	109	14	16	35	2.97043	2.43875	3.09294	0.338587	0.416383	0.785358	9.68627e-09	-1.78732	down	--	--	Biological Process: lipid metabolic process (GO:0006629);; Cellular Component: integral component of membrane (GO:0016021);; Molecular Function: oxidoreductase activity (GO:0016491);; Molecular Function: oxidoreductase activity, acting on the CH-CH group of donors (GO:0016627);;	K09591|5.4e-17|gra:105779649|K09591 steroid 5-alpha-reductase [EC:1.3.1.22] | (RefSeq) steroid 5-alpha-reductase DET2	Brassinosteroid biosynthesis (ko00905)	[I]	Lipid transport and metabolism	3-oxo-5-alpha-steroid 4-dehydrogenase	Polyprenol reductase 1 OS=Arabidopsis thaliana OX=3702 GN=PPRD1 PE=1 SV=1	I	Lipid transport and metabolism	PREDICTED: very-long-chain enoyl-CoA reductase-like [Prunus mume]
PaF106G0800031767.01	2885	2529	3079	6428	5543	5684	36.0299	37.798	39.6546	87.3709	80.8086	71.0664	1.97974e-26	1.12784	up	--	--	Molecular Function: Rab GDP-dissociation inhibitor activity (GO:0005093);; Cellular Component: cytoplasm (GO:0005737);; Biological Process: small GTPase mediated signal transduction (GO:0007264);; Biological Process: protein transport (GO:0015031);; Biological Process: vesicle-mediated transport (GO:0016192);; Molecular Function: Rab GTPase binding (GO:0017137);; Cellular Component: apoplast (GO:…	K17255|2.8e-260|pmum:103335884|K17255 Rab GDP dissociation inhibitor | (RefSeq) guanosine nucleotide diphosphate dissociation inhibitor At5g09550	--	[O]	Posttranslational modification, protein turnover, chaperones	GDP dissociation inhibitor	Guanosine nucleotide diphosphate dissociation inhibitor At5g09550 OS=Arabidopsis thaliana OX=3702 GN=At5g09550 PE=3 SV=1	O	Posttranslational modification, protein turnover, chaperones	unnamed protein product [Prunus armeniaca]
PaF106G0100000812.01	40	46	57	225	228	323	0.340917	0.466599	0.49639	2.07806	2.25889	2.75394	1.73642e-23	2.25213	up	--	--	Molecular Function: RNA binding (GO:0003723);; Cellular Component: cytosol (GO:0005829);; Biological Process: posttranscriptional gene silencing by RNA (GO:0035194);; Cellular Component: P granule (GO:0043186);;	K18422|2.9e-161|pmum:103323612|K18422 helicase MOV-10 [EC:3.6.4.13] | (RefSeq) probable RNA helicase SDE3	--	--	--	--	--	A	RNA processing and modification	unnamed protein product [Prunus armeniaca]
PaF106G0300011999.01	21	38	9	61	70	121	0.19712	0.429776	0.08907	0.632735	0.781433	1.16852	0.000362394	1.30973	up	[C]	Energy production and conversion	Molecular Function: isocitrate lyase activity (GO:0004451);; Biological Process: carboxylic acid metabolic process (GO:0019752);; Molecular Function: metal ion binding (GO:0046872);;	K01637|0.0e+00|pmum:103329397|K01637 isocitrate lyase [EC:4.1.3.1] | (RefSeq) isocitrate lyase isoform X1	Glyoxylate and dicarboxylate metabolism (ko00630);; Carbon metabolism (ko01200)	[C]	Energy production and conversion	Isocitrate lyase family	Isocitrate lyase OS=Gossypium hirsutum OX=3635 PE=2 SV=1	C	Energy production and conversion	isocitrate lyase [Prunus sibirica]
PaF106G0600023951.01	0	0	0	495	413	421	0	0	0	32.8407	29.3951	25.7296	3.66251e-87	5.98596	up	--	--	Molecular Function: GDP-dissociation inhibitor activity (GO:0005092);; Biological Process: small GTPase mediated signal transduction (GO:0007264);;	K17255|5.3e-06|ghi:107898345|K17255 Rab GDP dissociation inhibitor | (RefSeq) guanosine nucleotide diphosphate dissociation inhibitor At5g09550-like	--	[O]	Posttranslational modification, protein turnover, chaperones	GDP dissociation inhibitor	Guanosine nucleotide diphosphate dissociation inhibitor At5g09550 OS=Arabidopsis thaliana OX=3702 GN=At5g09550 PE=3 SV=1	--	--	unnamed protein product [Prunus armeniaca]
PaF106G0100002222.01	15	4	4	69	52	81	0.229277	0.064109	0.048568	1.16852	0.928359	1.25418	4.09511e-09	2.11265	up	[O]	Posttranslational modification, protein turnover, chaperones	Molecular Function: electron carrier activity (GO:0009055);; Molecular Function: protein disulfide oxidoreductase activity (GO:0015035);;	K07390|5.5e-14|adu:107485934|K07390 monothiol glutaredoxin | (RefSeq) monothiol glutaredoxin-S7, chloroplastic	--	[O]	Posttranslational modification, protein turnover, chaperones	Glutaredoxin	Monothiol glutaredoxin-S11 OS=Oryza sativa subsp. japonica OX=39947 GN=GRXS11 PE=2 SV=2	O	Posttranslational modification, protein turnover, chaperones	unnamed protein product [Prunus armeniaca]
PaF106G0600023832.01	225	202	222	79	51	103	2.00453	2.1531	2.04269	0.759792	0.529063	0.912988	5.37124e-08	-1.26498	down	--	--	Molecular Function: molecular_function (GO:0003674);; Molecular Function: nucleic acid binding (GO:0003676);; Molecular Function: RNA binding (GO:0003723);; Molecular Function: catalytic activity (GO:0003824);; Molecular Function: nuclease activity (GO:0004518);; Molecular Function: endonuclease activity (GO:0004519);; Molecular Function: binding (GO:0005488);; Cellular Component: cellular_compon…	K22262|1.4e-81|qsu:112034235|K22262 WD repeat and FYVE domain-containing protein 3 | (RefSeq) protein SPIRRIG	--	[R]	General function prediction only	PPR repeat	Pentatricopeptide repeat-containing protein At4g39952, mitochondrial OS=Arabidopsis thaliana OX=3702 GN=PCMP-E98 PE=2 SV=2	S	Function unknown	unnamed protein product [Prunus armeniaca]
PaF106G0400016586.01	230	288	191	4	0	16	3.538	5.30272	3.02617	0.058305	0	0.244563	0.00163264	-1.17428	down	--	--	Molecular Function: transferase activity, transferring acyl groups other than amino-acyl groups (GO:0016747);;	K13065|3.5e-109|pavi:110771447|K13065 shikimate O-hydroxycinnamoyltransferase [EC:2.3.1.133] | (RefSeq) BAHD acyltransferase At5g47980-like	Phenylpropanoid biosynthesis (ko00940);; Flavonoid biosynthesis (ko00941);; Stilbenoid, diarylheptanoid and gingerol biosynthesis (ko00945)	--	--	Transferase family	Stemmadenine O-acetyltransferase OS=Catharanthus roseus OX=4058 GN=SAT PE=1 SV=1	S	Function unknown	PREDICTED: vinorine synthase-like [Prunus mume]
PaF106G0500018586.01	14	14	10	62	91	137	0.422549	0.497751	0.317879	2.08782	3.30594	4.29592	1.30221e-11	2.21938	up	--	--	Cellular Component: integral component of membrane (GO:0016021);;	K01537|8.4e-40|pavi:110773092|K01537 P-type Ca2+ transporter type 2C [EC:7.2.2.10] | (RefSeq) putative calcium-transporting ATPase 11, plasma membrane-type isoform X1	--	--	--	--	--	S	Function unknown	PREDICTED: uncharacterized protein LOC103343208 isoform X2 [Prunus mume]
PaF106G0100006536.01	57	62	80	158	146	131	0.752717	0.981835	1.09678	2.43022	2.39652	1.73087	4.78299e-05	1.06577	up	--	--	Cellular Component: integral component of membrane (GO:0016021);; Molecular Function: transmembrane transporter activity (GO:0022857);;	K17500|1.4e-36|nta:107765414|K17500 integrin-linked kinase-associated serine/threonine phosphatase 2C [EC:3.1.3.16] | (RefSeq) WAT1-related protein At3g18200-like	--	--	--	EamA-like transporter family	WAT1-related protein At5g64700 OS=Arabidopsis thaliana OX=3702 GN=At5g64700 PE=2 SV=1	S	Function unknown	WAT1-related protein At5g64700 isoform X2 [Prunus persica]
PaF106G0300011157.01	70	77	76	5	0	5	1.50458	1.92564	1.5445	0.075236	0	0.09822	5.72492e-14	-2.68451	down	[O]	Posttranslational modification, protein turnover, chaperones	Molecular Function: metalloendopeptidase activity (GO:0004222);; Cellular Component: integral component of endoplasmic reticulum membrane (GO:0030176);; Biological Process: CAAX-box protein processing (GO:0071586);;	--	--	--	--	Peptidase family M48	--	O	Posttranslational modification, protein turnover, chaperones	unnamed protein product [Prunus armeniaca]
PaF106G0100005726.01	1967	1551	1909	3546	3552	3661	22.1036	20.8562	22.1281	43.3749	46.5899	41.19	1.29876e-31	1.06769	up	[R]	General function prediction only	Molecular Function: hydrolase activity (GO:0016787);;	K21604|5.3e-273|pmum:103319809|K21604 jasmonoyl-L-amino acid hydrolase [EC:3.5.1.127] | (RefSeq) IAA-amino acid hydrolase ILR1-like 6	--	--	--	Peptidase family M20/M25/M40	IAA-amino acid hydrolase ILR1-like 6 OS=Arabidopsis thaliana OX=3702 GN=ILL6 PE=1 SV=2	S	Function unknown	unnamed protein product [Prunus armeniaca]
PaF106G0400015467.01	71	53	44	139	196	271	3.45571	3.0406	2.20591	7.32956	11.1141	13.1968	1.10465e-10	1.66996	up	--	--	Cellular Component: integral component of membrane (GO:0016021);;	--	--	--	--	--	--	--	--	PREDICTED: uncharacterized protein LOC103326649 [Prunus mume]
PaF106G0100001230.01	28	16	23	83	85	105	0.127794	0.086343	0.113006	0.435016	0.586145	0.585646	1.21376e-08	1.71295	up	[V]	Defense mechanisms	Molecular Function: ATP binding (GO:0005524);; Cellular Component: integral component of membrane (GO:0016021);; Molecular Function: ATPase activity (GO:0016887);; Molecular Function: ATPase activity, coupled to transmembrane movement of substances (GO:0042626);;	K05658|0.0e+00|pper:18789915|K05658 ATP-binding cassette, subfamily B (MDR/TAP), member 1 [EC:7.6.2.2] | (RefSeq) ABC transporter B family member 11	ABC transporters (ko02010)	[Q]	Secondary metabolites biosynthesis, transport and catabolism	ABC transporter transmembrane region	ABC transporter B family member 11 OS=Arabidopsis thaliana OX=3702 GN=ABCB11 PE=2 SV=1	Q	Secondary metabolites biosynthesis, transport and catabolism	unnamed protein product [Prunus armeniaca]
PaF106G0200007395.01	361	424	330	1005	902	1230	1.68782	2.39106	1.58363	5.08813	5.00442	5.82514	5.56999e-24	1.49635	up	[R]	General function prediction only	Molecular Function: ADP binding (GO:0043531);;	K12818|7.4e-213|mtr:MTR_0267s0070|K12818 ATP-dependent RNA helicase DHX8/PRP22 [EC:3.6.4.13] | (RefSeq) NB-ARC domain disease resistance protein, putative	Spliceosome (ko03040)	[T]	Signal transduction mechanisms	NB-ARC domain	Putative disease resistance RPP13-like protein 1 OS=Arabidopsis thaliana OX=3702 GN=RPPL1 PE=3 SV=1	T	Signal transduction mechanisms	PREDICTED: LOW QUALITY PROTEIN: putative disease resistance RPP13-like protein 1 [Prunus mume]
PaF106G0300013768.01	1704	1475	1869	632	574	878	12.9494	13.4176	14.6544	5.22748	5.08528	6.68174	6.28244e-22	-1.16811	down	[M]	Cell wall/membrane/envelope biogenesis	Cellular Component: integral component of membrane (GO:0016021);;	--	--	[M]	Cell wall/membrane/envelope biogenesis	Glycosyl-transferase family 4	--	M	Cell wall/membrane/envelope biogenesis	unnamed protein product [Prunus armeniaca]
PaF106G0300010997.01	79	54	106	141	191	177	2.65198	2.17214	3.66787	5.17631	7.49946	5.97019	8.23358e-05	1.03889	up	--	--	Cellular Component: integral component of membrane (GO:0016021);;	--	--	--	--	Protein of unknown function (DUF3339)	--	S	Function unknown	unnamed protein product [Prunus armeniaca]
PaF106G0400015359.01	78	50	96	21	14	31	0.799068	0.610901	1.00711	0.227314	0.156999	0.308802	0.000212144	-1.2627	down	--		Biological Process: defense response to oomycetes (GO:0002229);; Molecular Function: transmembrane receptor protein serine/threonine kinase activity (GO:0004675);; Molecular Function: ATP binding (GO:0005524);; Cellular Component: plasma membrane (GO:0005886);; Biological Process: defense response (GO:0006952);; Molecular Function: carbohydrate binding (GO:0030246);; Biological Process: defense r…	K22133|1.3e-94|egr:104443802|K22133 oxalate---CoA ligase [EC:6.2.1.8] | (RefSeq) oxalate--CoA ligase	Glyoxylate and dicarboxylate metabolism (ko00630)	--	--	Legume lectin domain	L-type lectin-domain containing receptor kinase IX.1 OS=Arabidopsis thaliana OX=3702 GN=LECRK91 PE=1 SV=1	T	Signal transduction mechanisms	PREDICTED: L-type lectin-domain containing receptor kinase IX.1-like isoform X1 [Prunus mume]
PaF106G0200010366.01	282	369	254	89	85	156	4.55183	7.22929	4.2408	1.62685	1.64475	2.71685	2.98111e-07	-1.25016	down	--	--	Molecular Function: AT DNA binding (GO:0003680);; Cellular Component: nucleus (GO:0005634);;	--	--	--	--	Plants and Prokaryotes Conserved (PCC) domain	AT-hook motif nuclear-localized protein 3 OS=Arabidopsis thaliana OX=3702 GN=AHL3 PE=1 SV=1	S	Function unknown	unnamed protein product [Prunus armeniaca]
PaF106G0300011112.01	182	176	207	36	61	61	6.00595	6.9549	7.04077	1.27992	2.32834	1.98491	9.72523e-10	-1.53699	down	--	--	Molecular Function: protein binding (GO:0005515);;	--	--	--	--	Ubiquitin family	BAG family molecular chaperone regulator 2 OS=Arabidopsis thaliana OX=3702 GN=BAG2 PE=1 SV=1	S	Function unknown	unnamed protein product [Prunus armeniaca]
PaF106G0600024932.01	71	23	32	85	82	118	0.970083	0.36334	0.441694	1.26903	1.30571	1.62383	0.00261652	1.00276	up	--	--	Molecular Function: protein serine/threonine phosphatase activity (GO:0004722);;	K14497|7.1e-26|rcu:8274369|K14497 protein phosphatase 2C [EC:3.1.3.16] | (RefSeq) probable protein phosphatase 2C 51	MAPK signaling pathway - plant (ko04016);; Plant hormone signal transduction (ko04075)	[T]	Signal transduction mechanisms	Protein phosphatase 2C	Probable protein phosphatase 2C 65 OS=Arabidopsis thaliana OX=3702 GN=At5g01700 PE=2 SV=1	T	Signal transduction mechanisms	PREDICTED: probable protein phosphatase 2C 65 isoform X1 [Prunus mume]
PaF106G0400016638.01	302	232	244	115	93	122	2.07767	1.89551	1.72818	0.861068	0.738993	0.832117	4.73374e-08	-1.06863	down	[M]	Cell wall/membrane/envelope biogenesis	Molecular Function: protein serine/threonine kinase activity (GO:0004674);; Molecular Function: ATP binding (GO:0005524);; Cellular Component: plasma membrane (GO:0005886);; Cellular Component: integral component of membrane (GO:0016021);; Biological Process: protein autophosphorylation (GO:0046777);;	K01180|9.4e-67|cmax:111487562|K01180 endo-1,3(4)-beta-glucanase [EC:3.2.1.6] | (RefSeq) uncharacterized protein LOC111487562	--	--	--	Protein tyrosine and serine/threonine kinase	Probable LRR receptor-like serine/threonine-protein kinase At1g56140 OS=Arabidopsis thaliana OX=3702 GN=At1g56140 PE=2 SV=2	T	Signal transduction mechanisms	PREDICTED: probable LRR receptor-like serine/threonine-protein kinase At1g56130 [Prunus mume]
PaF106G0200010358.01	638	616	451	202	221	286	6.23551	7.20664	4.54807	2.14859	2.51474	2.79318	5.19207e-10	-1.12112	down	[O]	Posttranslational modification, protein turnover, chaperones	Molecular Function: protein kinase activity (GO:0004672);; Molecular Function: ATP binding (GO:0005524);; Cellular Component: integral component of membrane (GO:0016021);;	K13418|1.3e-46|peq:110028906|K13418 somatic embryogenesis receptor kinase 1 [EC:2.7.10.1 2.7.11.1] | (RefSeq) LRR receptor kinase BAK1-like	--	--	--	Protein tyrosine and serine/threonine kinase	LRR receptor kinase SERK2 OS=Oryza sativa subsp. japonica OX=39947 GN=SERK2 PE=1 SV=1	T	Signal transduction mechanisms	unnamed protein product [Prunus armeniaca]
PaF106G0100004522.01	564	228	318	106	109	124	13.2581	6.43486	7.65066	2.67363	3.14818	2.88761	6.73612e-09	-1.41233	down	--	--	Biological Process: protein polyubiquitination (GO:0000209);; Molecular Function: ATP binding (GO:0005524);; Cellular Component: nucleus (GO:0005634);; Molecular Function: NEDD8 transferase activity (GO:0019788);; Biological Process: protein neddylation (GO:0045116);; Molecular Function: ubiquitin conjugating enzyme activity (GO:0061631);;	K10579|3.4e-103|pper:18789696|K10579 ubiquitin-conjugating enzyme E2 M [EC:2.3.2.34] | (RefSeq) probable NEDD8-conjugating enzyme Ubc12-like isoform X2	Ubiquitin mediated proteolysis (ko04120)	[O]	Posttranslational modification, protein turnover, chaperones	Ubiquitin-conjugating enzyme	Probable NEDD8-conjugating enzyme Ubc12-like OS=Arabidopsis thaliana OX=3702 GN=RCE2 PE=2 SV=1	O	Posttranslational modification, protein turnover, chaperones	unnamed protein product [Prunus armeniaca]
PaF106G0400017774.01	9314	7620	7292	2132	2933	3672	165.242	161.788	133.448	41.165	60.7271	65.2173	1.7425e-24	-1.3469	down	--	--	Cellular Component: cell periphery (GO:0071944);;	--	--	--	--	Pollen protein Ole e 1 like	Non-classical arabinogalactan protein 31 OS=Arabidopsis thaliana OX=3702 GN=AGP31 PE=1 SV=1	S	Function unknown	unnamed protein product [Prunus armeniaca]
PaF106G0400016906.01	350	327	337	90	102	123	5.61379	6.27026	5.58372	1.55943	1.90029	1.96395	9.99692e-17	-1.50597	down	[P]	Inorganic ion transport and metabolism	Molecular Function: zinc ion transmembrane transporter activity (GO:0005385);; Cellular Component: plasma membrane (GO:0005886);; Cellular Component: membrane (GO:0016020);; Cellular Component: integral component of membrane (GO:0016021);; Biological Process: zinc II ion transmembrane transport (GO:0071577);;	K14709|1.2e-181|pmum:103325500|K14709 solute carrier family 39 (zinc transporter), member 1/2/3 | (RefSeq) zinc transporter 8-like	--	[P]	Inorganic ion transport and metabolism	ZIP Zinc transporter	Zinc transporter 1 OS=Arabidopsis thaliana OX=3702 GN=ZIP1 PE=2 SV=1	P	Inorganic ion transport and metabolism	unnamed protein product [Prunus armeniaca]
PaF106G0600021620.01	561	564	534	200	168	316	7.33795	8.68427	7.01174	2.78139	2.50535	4.06704	3.57121e-10	-1.14386	down	--	--	Biological Process: regulation of cyclin-dependent protein serine/threonine kinase activity (GO:0000079);; Cellular Component: cyclin-dependent protein kinase holoenzyme complex (GO:0000307);; Cellular Component: nucleus (GO:0005634);; Cellular Component: cytoplasm (GO:0005737);; Molecular Function: cyclin-dependent protein serine/threonine kinase regulator activity (GO:0016538);; Cellular Compon…	K21777|1.1e-245|pmum:103319481|K21777 G2/mitotic-specific cyclin-B, other | (RefSeq) G2/mitotic-specific cyclin S13-7-like	--	[D]	Cell cycle control, cell division, chromosome partitioning	Cyclin, N-terminal domain	G2/mitotic-specific cyclin-2 OS=Antirrhinum majus OX=4151 PE=2 SV=1	D	Cell cycle control, cell division, chromosome partitioning	unnamed protein product [Prunus armeniaca]
PaF106G0300014130.01	119	79	83	17	32	48	1.73129	1.36181	1.21985	0.252291	0.556683	0.688201	0.000510808	-1.13815	down	--	--	Molecular Function: ATP binding (GO:0005524);; Cellular Component: nucleus (GO:0005634);; Biological Process: transcription, DNA-templated (GO:0006351);; Biological Process: regulation of transcription, DNA-templated (GO:0006355);; Cellular Component: integral component of membrane (GO:0016021);; Biological Process: developmental process (GO:0032502);;	K22382|3.0e-10|oeu:111408549|K22382 WD repeat-containing protein 26 | (RefSeq) WD repeat-containing protein 26 homolog	--	--	--	WRC	Growth-regulating factor 5 OS=Arabidopsis thaliana OX=3702 GN=GRF5 PE=1 SV=1	K	Transcription	PREDICTED: growth-regulating factor 5 isoform X1 [Prunus mume]
PaF106G0200009803.01	16002	12071	16688	34932	34661	36722	206.262	186.204	221.886	490.07	521.529	473.924	7.09206e-48	1.32553	up	--	--	Molecular Function: hydrolase activity, hydrolyzing O-glycosyl compounds (GO:0004553);; Biological Process: carbohydrate metabolic process (GO:0005975);;	K19891|2.5e-76|bna:106401262|K19891 glucan endo-1,3-beta-glucosidase 1/2/3 [EC:3.2.1.39] | (RefSeq) glucan endo-1,3-beta-glucosidase 3	Starch and sucrose metabolism (ko00500)	--	--	Glycosyl hydrolases family 17	Glucan endo-1,3-beta-glucosidase OS=Triticum aestivum OX=4565 GN=GLC1 PE=2 SV=1	G	Carbohydrate transport and metabolism	unnamed protein product [Prunus armeniaca]
PaF106G0300012869.01	54	69	62	125	134	157	0.579161	0.880952	0.679049	1.46204	1.67788	1.67646	1.85071e-05	1.09201	up	--	--	Molecular Function: kinase activity (GO:0016301);; Molecular Function: polysaccharide binding (GO:0030247);;	--	--	--	--	Wall-associated receptor kinase C-terminal	--	T	Signal transduction mechanisms	unnamed protein product [Prunus armeniaca]
PaF106G0500019669.01	148	100	122	312	269	291	1.00254	0.811442	0.855608	2.30861	2.13489	1.97753	6.92027e-11	1.24686	up	[P]	Inorganic ion transport and metabolism	Molecular Function: copper ion binding (GO:0005507);; Molecular Function: ATP binding (GO:0005524);; Cellular Component: integral component of membrane (GO:0016021);; Molecular Function: copper-transporting ATPase activity (GO:0043682);;	K17686|0.0e+00|pavi:110758031|K17686 P-type Cu+ transporter [EC:7.2.2.8] | (RefSeq) probable copper-transporting ATPase HMA5	MAPK signaling pathway - plant (ko04016)	[P]	Inorganic ion transport and metabolism	E1-E2 ATPase	Probable copper-transporting ATPase HMA5 OS=Arabidopsis thaliana OX=3702 GN=HMA5 PE=1 SV=2	P	Inorganic ion transport and metabolism	probable copper-transporting ATPase HMA5 [Prunus avium]
PaF106G0100005230.01	289	141	138	523	445	556	5.95126	3.46996	2.92039	11.7042	10.6775	11.4443	7.63076e-11	1.3982	up	[G]	Carbohydrate transport and metabolism	Molecular Function: channel activity (GO:0015267);; Cellular Component: integral component of membrane (GO:0016021);;	K09873|2.4e-136|pavi:110761269|K09873 aquaporin TIP | (RefSeq) aquaporin TIP4-1	--	[G]	Carbohydrate transport and metabolism	Major intrinsic protein	Aquaporin TIP4-1 OS=Arabidopsis thaliana OX=3702 GN=TIP4-1 PE=2 SV=1	G	Carbohydrate transport and metabolism	aquaporin TIP4-1 [Prunus avium]
PaF106G0300012225.01	252	166	299	19	40	37	4.74436	3.73945	5.79832	0.383191	0.869663	0.692261	2.44661e-18	-2.36153	down	[M]	Cell wall/membrane/envelope biogenesis	Biological Process: response to acid chemical (GO:0001101);; Molecular Function: molecular_function (GO:0003674);; Molecular Function: nucleic acid binding (GO:0003676);; Molecular Function: RNA binding (GO:0003723);; Molecular Function: mRNA binding (GO:0003729);; Molecular Function: binding (GO:0005488);; Cellular Component: cellular_component (GO:0005575);; Cellular Component: intracellular (G…	K20285|1.7e-11|smo:SELMODRAFT_441110|K20285 Rab9 effector protein with kelch motifs | (RefSeq) hypothetical protein	--	[R]	General function prediction only	Galactose oxidase, central domain	Nitrile-specifier protein 2 OS=Arabidopsis thaliana OX=3702 GN=NSP2 PE=2 SV=1	S	Function unknown	unnamed protein product [Prunus armeniaca]
PaF106G0500020327.01	7215	5088	7302	2802	2326	3049	103.334	87.2096	107.867	43.6707	38.8867	43.7213	3.91998e-28	-1.14539	down	[IR]	Lipid transport and metabolism;; General function prediction only	Molecular Function: hydrolase activity, acting on ester bonds (GO:0016788);;	K01206|1.5e-39|boe:106299976|K01206 alpha-L-fucosidase [EC:3.2.1.51] | (RefSeq) alpha-L-fucosidase 3	Other glycan degradation (ko00511)	--	--	GDSL-like Lipase/Acylhydrolase	GDSL esterase/lipase At3g48460 OS=Arabidopsis thaliana OX=3702 GN=At3g48460 PE=2 SV=1	S	Function unknown	unnamed protein product [Prunus armeniaca]
PaF106G0300013116.01	29	8	6	125	95	176	0.496048	0.150029	0.093292	2.39514	1.95487	3.1172	1.82888e-12	2.37103	up	[H]	Coenzyme transport and metabolism	Molecular Function: O-methyltransferase activity (GO:0008171);; Molecular Function: S-adenosylmethionine-dependent methyltransferase activity (GO:0008757);; Biological Process: aromatic compound biosynthetic process (GO:0019438);; Biological Process: methylation (GO:0032259);; Molecular Function: protein dimerization activity (GO:0046983);;	K16040|3.1e-154|pmum:103328492|K16040 trans-resveratrol di-O-methyltransferase [EC:2.1.1.240] | (RefSeq) trans-resveratrol di-O-methyltransferase-like	Stilbenoid, diarylheptanoid and gingerol biosynthesis (ko00945)	[R]	General function prediction only	O-methyltransferase domain	Probable O-methyltransferase 3 OS=Humulus lupulus OX=3486 GN=OMT3 PE=2 SV=1	S	Function unknown	trans-resveratrol di-O-methyltransferase-like [Prunus persica]
PaF106G0800032154.01	40	33	37	123	119	139	0.223161	0.216706	0.208139	0.744409	0.771588	0.777069	2.83444e-10	1.63024	up	[R]	General function prediction only	Biological Process: signal transduction (GO:0007165);; Molecular Function: ADP binding (GO:0043531);;	K00695|7.3e-127|mtr:MTR_6g478030|K00695 sucrose synthase [EC:2.4.1.13] | (RefSeq) sucrose synthase	Starch and sucrose metabolism (ko00500)	--	--	TIR domain	TMV resistance protein N OS=Nicotiana glutinosa OX=35889 GN=N PE=1 SV=1	S	Function unknown	TMV resistance protein N [Prunus persica]
PaF106G0200009133.01	1012	758	841	159	186	155	5.35815	4.80198	4.5926	0.914839	1.14714	0.821563	1.97614e-46	-2.17916	down	--	--	Biological Process: protein folding (GO:0006457);; Cellular Component: plasmodesma (GO:0009506);; Molecular Function: chaperone binding (GO:0051087);;	--	--	--	--	BAG domain	BAG family molecular chaperone regulator 6 OS=Arabidopsis thaliana OX=3702 GN=BAG6 PE=1 SV=1	S	Function unknown	unnamed protein product [Prunus armeniaca]
PaF106G0600023102.01	428	256	315	42	63	45	5.21281	3.7289	3.95261	0.546058	0.893436	0.542097	7.78055e-24	-2.33293	down	--		Molecular Function: protein kinase activity (GO:0004672);; Molecular Function: ATP binding (GO:0005524);; Cellular Component: integral component of membrane (GO:0016021);;	K13416|3.1e-46|egr:104419928|K13416 brassinosteroid insensitive 1-associated receptor kinase 1 [EC:2.7.10.1 2.7.11.1] | (RefSeq) BRASSINOSTEROID INSENSITIVE 1-associated receptor kinase 1	MAPK signaling pathway - plant (ko04016);; Plant hormone signal transduction (ko04075);; Plant-pathogen interaction (ko04626)	[T]	Signal transduction mechanisms	Protein kinase domain	Rust resistance kinase Lr10 OS=Triticum aestivum OX=4565 GN=LRK10 PE=2 SV=1	T	Signal transduction mechanisms	rust resistance kinase Lr10-like isoform X1 [Prunus avium]
PaF106G0800029463.01	525	326	562	68	37	172	4.4912	3.3335	4.96198	0.63379	0.361618	1.47236	0.000226638	-1.41553	down	[P]	Inorganic ion transport and metabolism	Biological Process: potassium ion transport (GO:0006813);; Molecular Function: potassium ion transmembrane transporter activity (GO:0015079);; Cellular Component: membrane (GO:0016020);; Cellular Component: integral component of membrane (GO:0016021);;	K03549|0.0e+00|pmum:103333887|K03549 KUP system potassium uptake protein | (RefSeq) potassium transporter 5-like	--	--	--	K+ potassium transporter	Potassium transporter 5 OS=Oryza sativa subsp. japonica OX=39947 GN=HAK5 PE=2 SV=2	P	Inorganic ion transport and metabolism	unnamed protein product [Prunus armeniaca]
PaF106G0600022159.01	473	305	348	129	117	104	8.29301	6.39994	6.29099	2.4586	2.3862	1.82532	3.35294e-13	-1.45685	down	--	--	Molecular Function: UDP-glycosyltransferase activity (GO:0008194);;	K13493|3.2e-25|ath:AT5G05870|K13493 cytokinin-N-glucosyltransferase [EC:2.4.1.-] | (RefSeq) UGT76C1; UDP-glucosyl transferase 76C1	Zeatin biosynthesis (ko00908)	[GC]	Carbohydrate transport and metabolism;; Energy production and conversion	UDP-glucoronosyl and UDP-glucosyl transferase	UDP-glycosyltransferase 76E4 OS=Arabidopsis thaliana OX=3702 GN=UGT76E4 PE=2 SV=1	--	--	UDP-glycosyltransferase 76E2-like isoform X1 [Prunus avium]
PaF106G0200008436.01	57	34	37	259	364	397	0.325144	0.239773	0.218787	1.91812	2.4929	2.34039	1.8966e-34	2.76257	up	[R]	General function prediction only	Biological Process: signal transduction (GO:0007165);; Molecular Function: ADP binding (GO:0043531);;	K00695|7.7e-116|mtr:MTR_6g478030|K00695 sucrose synthase [EC:2.4.1.13] | (RefSeq) sucrose synthase	Starch and sucrose metabolism (ko00500)	--	--	TIR domain	Disease resistance protein RUN1 OS=Vitis rotundifolia OX=103349 GN=RUN1 PE=1 SV=1	S	Function unknown	PREDICTED: TMV resistance protein N-like [Prunus mume]
PaF106G0300013600.01	68	70	96	203	192	153	1.07924	1.32153	1.57863	3.52105	3.56066	2.4329	5.2096e-06	1.16499	up	--	--	Biological Process: transcription, DNA-templated (GO:0006351);; Molecular Function: sequence-specific DNA binding (GO:0043565);;	--	--	--	--	Seed dormancy control	--	S	Function unknown	unnamed protein product [Prunus armeniaca]
PaF106G0200008837.01	267	198	124	18	22	36	1.78387	1.57781	0.854015	0.123889	0.166074	0.237894	1.62836e-15	-2.33092	down	--	--	Cellular Component: integral component of membrane (GO:0016021);;	K13466|1.8e-263|pper:18785913|K13466 EIX receptor 1/2 | (RefSeq) LRR receptor-like serine/threonine-protein kinase GSO2 isoform X1	Plant-pathogen interaction (ko04626)	[R]	General function prediction only	Leucine rich repeat	Receptor-like protein EIX2 OS=Solanum lycopersicum OX=4081 GN=EIX2 PE=1 SV=2	P	Inorganic ion transport and metabolism	disease resistance family protein / LRR family protein [Prunus dulcis]
PaF106G0400017389.01	65	45	51	202	162	239	2.57044	2.00195	2.08896	6.19291	5.14333	6.29889	4.17555e-15	1.78727	up	[R]	General function prediction only	Cellular Component: cellular_component (GO:0005575);; Cellular Component: intracellular (GO:0005622);; Cellular Component: cell (GO:0005623);; Cellular Component: cytoplasm (GO:0005737);; Cellular Component: chloroplast (GO:0009507);; Cellular Component: plastid envelope (GO:0009526);; Cellular Component: plastid stroma (GO:0009532);; Cellular Component: chloroplast thylakoid (GO:0009534);; Cellu…	--	--	[G]	Carbohydrate transport and metabolism	NAD(P)H-binding	Uncharacterized protein At2g34460, chloroplastic OS=Arabidopsis thaliana OX=3702 GN=At2g34460 PE=1 SV=1	G	Carbohydrate transport and metabolism	uncharacterized protein At2g34460, chloroplastic-like [Prunus dulcis]
Prunus_sibirica_newGene_743	139	117	169	58	52	61	0.949024	0.952847	1.19216	0.562386	0.413106	0.539901	2.5051e-05	-1.07535	down	--	--	Biological Process: mitochondrial RNA metabolic process (GO:0000959);; Molecular Function: molecular_function (GO:0003674);; Molecular Function: nucleic acid binding (GO:0003676);; Molecular Function: RNA binding (GO:0003723);; Molecular Function: catalytic activity (GO:0003824);; Molecular Function: nuclease activity (GO:0004518);; Molecular Function: endonuclease activity (GO:0004519);; Molecul…	K23541|8.4e-22|cmax:111492492|K23541 Ca2+/H+ antiporter, TMEM165/GDT1 family | (RefSeq) putative pentatricopeptide repeat-containing protein At3g23330	--	[R]	General function prediction only	PPR repeat	Putative pentatricopeptide repeat-containing protein At1g64310 OS=Arabidopsis thaliana OX=3702 GN=PCMP-E65 PE=3 SV=1	S	Function unknown	unnamed protein product [Prunus armeniaca]
PaF106G0200009651.01	15	12	11	73	59	62	0.097049	0.098066	0.078207	0.545123	0.475582	0.427864	9.57128e-08	1.79715	up	--	--	Molecular Function: ion channel activity (GO:0005216);; Cellular Component: integral component of membrane (GO:0016021);;	K05391|7.1e-304|pper:18787509|K05391 cyclic nucleotide gated channel, plant | (RefSeq) cyclic nucleotide-gated ion channel 1 isoform X1	Plant-pathogen interaction (ko04626)	[PT]	Inorganic ion transport and metabolism;; Signal transduction mechanisms	Cyclic nucleotide-binding domain	Cyclic nucleotide-gated ion channel 1 OS=Arabidopsis thaliana OX=3702 GN=CNGC1 PE=1 SV=1	U	Intracellular trafficking, secretion, and vesicular transport	cyclic nucleotide-gated ion channel 1-like isoform X3 [Prunus dulcis]
PaF106G0100005281.01	603	473	680	280	242	271	16.4827	15.4733	19.17	8.32065	7.73071	7.40821	1.94693e-10	-1.00483	down	[P]	Inorganic ion transport and metabolism	Biological Process: response to hypoxia (GO:0001666);; Molecular Function: oxygen transporter activity (GO:0005344);; Molecular Function: oxygen binding (GO:0019825);; Molecular Function: heme binding (GO:0020037);;	K02349|7.5e-36|csat:104730000|K02349 DNA polymerase theta [EC:2.7.7.7] | (RefSeq) helicase and polymerase-containing protein TEBICHI-like isoform X1	--	--	--	Bacterial-like globin	Two-on-two hemoglobin-3 OS=Arabidopsis thaliana OX=3702 GN=GLB3 PE=1 SV=1	S	Function unknown	unnamed protein product [Prunus armeniaca]
PaF106G0300014138.01	12	10	6	146	115	172	0.06008	0.058769	0.032052	0.853126	0.716484	0.922785	2.13702e-26	3.15286	up	--	--	Cellular Component: integral component of membrane (GO:0016021);; Molecular Function: ADP binding (GO:0043531);;	K13457|4.0e-43|qsu:112007111|K13457 disease resistance protein RPM1 | (RefSeq) disease resistance protein RPM1-like	Plant-pathogen interaction (ko04626)	[T]	Signal transduction mechanisms	NB-ARC domain	Probable disease resistance RPP8-like protein 2 OS=Arabidopsis thaliana OX=3702 GN=RPP8L2 PE=3 SV=1	T	Signal transduction mechanisms	unnamed protein product [Prunus armeniaca]
PaF106G0100000986.01	163	139	104	292	287	247	1.65432	1.69811	1.0901	3.24284	3.41898	2.52326	4.11754e-06	1.02425	up	[J]	Translation, ribosomal structure and biogenesis	Molecular Function: tRNA binding (GO:0000049);; Molecular Function: lysine-tRNA ligase activity (GO:0004824);; Molecular Function: ATP binding (GO:0005524);; Cellular Component: cytosol (GO:0005829);; Biological Process: lysyl-tRNA aminoacylation (GO:0006430);; Cellular Component: integral component of membrane (GO:0016021);;	K04567|0.0e+00|pper:18791418|K04567 lysyl-tRNA synthetase, class II [EC:6.1.1.6] | (RefSeq) lysine--tRNA ligase, cytoplasmic isoform X1	Aminoacyl-tRNA biosynthesis (ko00970)	[J]	Translation, ribosomal structure and biogenesis	tRNA synthetases class II (D, K and N)	Lysine--tRNA ligase, cytoplasmic OS=Arabidopsis thaliana OX=3702 GN=At3g11710 PE=1 SV=1	J	Translation, ribosomal structure and biogenesis	lysine--tRNA ligase, cytoplasmic isoform X2 [Prunus persica]
PaF106G0100005392.01	775	291	345	175	222	153	6.64569	2.91244	2.92587	1.62156	2.15938	1.36427	0.000126265	-1.04655	down	--	--	Molecular Function: GTPase activator activity (GO:0005096);; Molecular Function: metal ion binding (GO:0046872);;	--	--	--	--	--	--	T	Signal transduction mechanisms	unnamed protein product [Prunus armeniaca]
PaF106G0200009083.01	173	136	141	55	44	67	1.79684	1.69952	1.51184	0.619946	0.525998	0.690636	1.09964e-06	-1.20091	down	--	--	Molecular Function: zinc ion binding (GO:0008270);;	K11985|0.0e+00|pper:18785721|K11985 TRAF-interacting protein [EC:2.3.2.27] | (RefSeq) uncharacterized protein LOC18785721	--	[O]	Posttranslational modification, protein turnover, chaperones	Ring finger domain	--	O	Posttranslational modification, protein turnover, chaperones	unnamed protein product [Prunus armeniaca]
PaF106G0100000244.01	217	413	322	714	552	889	1.35537	3.09731	2.08288	4.88561	4.05282	5.59313	8.59587e-07	1.109	up	[R]	General function prediction only	Biological Process: signal transduction (GO:0007165);; Molecular Function: ADP binding (GO:0043531);;	K00695|2.7e-163|mtr:MTR_6g478030|K00695 sucrose synthase [EC:2.4.1.13] | (RefSeq) sucrose synthase	Starch and sucrose metabolism (ko00500)	--	--	TIR domain	Disease resistance protein RPV1 OS=Vitis rotundifolia OX=103349 GN=RPV1 PE=1 SV=1	T	Signal transduction mechanisms	PREDICTED: TMV resistance protein N-like [Prunus mume]
PaF106G0400017065.01	408	299	300	52	70	79	4.00601	3.49336	3.02525	0.546692	0.79955	0.770692	2.00493e-23	-2.04813	down	[R]	General function prediction only	Molecular Function: protein kinase activity (GO:0004672);; Molecular Function: ATP binding (GO:0005524);; Cellular Component: integral component of membrane (GO:0016021);;	K01180|3.3e-71|cmax:111487562|K01180 endo-1,3(4)-beta-glucanase [EC:3.2.1.6] | (RefSeq) uncharacterized protein LOC111487562	--	--	--	Protein kinase domain	Probable LRR receptor-like serine/threonine-protein kinase At1g56140 OS=Arabidopsis thaliana OX=3702 GN=At1g56140 PE=2 SV=2	T	Signal transduction mechanisms	hypothetical protein PRUPE_4G104500 [Prunus persica]
PaF106G0600022513.01	2222	2326	2700	51	29	59	26.7875	33.5584	33.5771	0.666612	0.404877	0.708499	1.1472e-224	-5.30796	down	--	--	Cellular Component: plasmodesma (GO:0009506);; Molecular Function: nutrient reservoir activity (GO:0045735);;	--	--	--	--	Cupin	Vicilin-like seed storage protein At2g28490 OS=Arabidopsis thaliana OX=3702 GN=At2g28490 PE=2 SV=1	S	Function unknown	unnamed protein product [Prunus armeniaca]
PaF106G0800030380.01	777	603	784	1465	1271	1451	13.9212	12.9258	14.4926	28.5741	26.5787	26.0238	4.6909e-20	1.02298	up	--	--	Molecular Function: inorganic phosphate transmembrane transporter activity (GO:0005315);; Cellular Component: integral component of mitochondrial inner membrane (GO:0031305);; Biological Process: phosphate ion transmembrane transport (GO:0035435);;	K15102|9.2e-178|pper:18766858|K15102 solute carrier family 25 (mitochondrial phosphate transporter), member 3 | (RefSeq) mitochondrial phosphate carrier protein 1, mitochondrial	--	[C]	Energy production and conversion	Mitochondrial carrier protein	Mitochondrial phosphate carrier protein 1, mitochondrial OS=Arabidopsis thaliana OX=3702 GN=MPT1 PE=2 SV=1	C	Energy production and conversion	mitochondrial phosphate carrier protein 1, mitochondrial [Prunus persica]
PaF106G0200006841.01	589	484	473	2656	2355	3120	7.32867	7.2337	5.91411	35.1409	33.4731	38.2554	1.0177e-136	2.43327	up	[G]	Carbohydrate transport and metabolism	Biological Process: carbohydrate metabolic process (GO:0005975);; Molecular Function: beta-glucosidase activity (GO:0008422);;	K22279|2.4e-303|pmum:103330511|K22279 vicianin beta-glucosidase [EC:3.2.1.119] | (RefSeq) vicianin hydrolase isoform X1	--	[G]	Carbohydrate transport and metabolism	Glycosyl hydrolase family 1	Vicianin hydrolase (Fragment) OS=Vicia sativa subsp. nigra OX=3909 PE=1 SV=1	G	Carbohydrate transport and metabolism	PREDICTED: vicianin hydrolase isoform X1 [Prunus mume]
PaF106G0800032607.01	112	123	104	16	37	60	0.597114	0.784997	0.57252	0.092009	0.23022	0.318647	0.000347205	-1.18544	down	[R]	General function prediction only	Biological Process: signal transduction (GO:0007165);; Molecular Function: ADP binding (GO:0043531);;	K00695|1.8e-123|mtr:MTR_6g478030|K00695 sucrose synthase [EC:2.4.1.13] | (RefSeq) sucrose synthase	Starch and sucrose metabolism (ko00500)	--	--	TIR domain	TMV resistance protein N OS=Nicotiana glutinosa OX=35889 GN=N PE=1 SV=1	S	Function unknown	PREDICTED: TMV resistance protein N-like [Prunus mume]
PaF106G0600022655.01	93	141	149	327	249	375	4.43696	8.06803	7.33109	17.0568	13.9501	17.9947	4.82468e-08	1.24119	up	--	--	Biological Process: response to auxin (GO:0009733);;	K14488|8.1e-60|pavi:110755469|K14488 SAUR family protein | (RefSeq) auxin-responsive protein SAUR50-like	Plant hormone signal transduction (ko04075)	--	--	Auxin responsive protein	Auxin-responsive protein SAUR50 OS=Arabidopsis thaliana OX=3702 GN=SAUR50 PE=1 SV=1	S	Function unknown	unnamed protein product [Prunus armeniaca]
PaF106G0700027494.01	230	252	236	574	790	834	3.03201	3.97422	3.20285	8.23784	12.171	11.0173	7.92067e-22	1.60378	up	[R]	General function prediction only	Molecular Function: phospholipase activity (GO:0004620);; Biological Process: lipid catabolic process (GO:0016042);; Molecular Function: acylglycerol lipase activity (GO:0047372);;	K16815|7.0e-06|gsl:Gasu_03780|K16815 calcium-independent phospholipase A2-gamma | (RefSeq) hypothetical protein	--	[I]	Lipid transport and metabolism	Patatin-like phospholipase	Patatin-like protein 2 OS=Arabidopsis thaliana OX=3702 GN=PLP2 PE=1 SV=1	I	Lipid transport and metabolism	PREDICTED: patatin-like protein 3 isoform X1 [Prunus mume]
PaF106G0800030307.01	66	62	62	126	153	196	0.930911	1.03061	0.890782	1.90423	2.48402	2.7343	2.88842e-07	1.24374	up	--	--	Cellular Component: integral component of membrane (GO:0016021);;	K09122|8.1e-84|sbi:8057957|K09122 uncharacterized protein | (RefSeq) uncharacterized protein LOC8057957	--	--	--	Protein of unknown function (DUF707)	--	S	Function unknown	uncharacterized protein LOC18766868 isoform X1 [Prunus persica]
PaF106G0200009654.01	345	223	315	38	42	51	6.47478	5.00101	6.09429	0.762908	0.95694	0.967804	5.13405e-28	-2.39917	down	[M]	Cell wall/membrane/envelope biogenesis	Molecular Function: protein kinase activity (GO:0004672);; Molecular Function: ATP binding (GO:0005524);;	K05391|6.6e-21|pper:18792510|K05391 cyclic nucleotide gated channel, plant | (RefSeq) cyclic nucleotide-gated ion channel 1 isoform X1	Plant-pathogen interaction (ko04626)	--	--	Protein kinase domain	Wall-associated receptor kinase 3 OS=Arabidopsis thaliana OX=3702 GN=WAK3 PE=2 SV=2	T	Signal transduction mechanisms	wall-associated receptor kinase 3-like [Prunus yedoensis var. nudiflora]
PaF106G0200010781.01	66	29	51	156	142	162	2.26311	1.16626	1.82133	5.87898	5.74885	5.60362	8.64656e-09	1.5206	up	--	--	Biological Process: metal ion transport (GO:0030001);; Molecular Function: metal ion binding (GO:0046872);;	--	--	[P]	Inorganic ion transport and metabolism	Heavy-metal-associated domain	Heavy metal-associated isoprenylated plant protein 30 OS=Arabidopsis thaliana OX=3702 GN=HIPP30 PE=1 SV=1	P	Inorganic ion transport and metabolism	unnamed protein product [Prunus armeniaca]
PaF106G0600021946.01	139	96	114	20	12	48	2.90277	2.41206	2.47215	0.441434	0.286058	0.997989	1.57505e-06	-1.57922	down	--	--	Cellular Component: nucleus (GO:0005634);; Biological Process: regulation of transcription, DNA-templated (GO:0006355);;	K12135|3.9e-06|thj:104802991|K12135 zinc finger protein CONSTANS | (RefSeq) zinc finger protein CONSTANS-LIKE 2-like	Circadian rhythm - plant (ko04712)	[K]	Transcription	CCT motif	Protein CHLOROPLAST IMPORT APPARATUS 2 OS=Arabidopsis thaliana OX=3702 GN=CIA2 PE=1 SV=1	K	Transcription	unnamed protein product [Prunus armeniaca]
PaF106G0800031976.01	2757	2290	2534	1039	995	1145	18.9445	18.8124	17.9149	7.75308	7.95443	7.84115	1.20962e-44	-1.14977	down	[P]	Inorganic ion transport and metabolism	Molecular Function: potassium ion transmembrane transporter activity (GO:0015079);; Cellular Component: integral component of membrane (GO:0016021);;	K03549|3.2e-273|tcc:18609410|K03549 KUP system potassium uptake protein | (RefSeq) putative potassium transporter 12	--	--	--	K+ potassium transporter	Potassium transporter 7 OS=Arabidopsis thaliana OX=3702 GN=POT7 PE=1 SV=2	P	Inorganic ion transport and metabolism	PREDICTED: potassium transporter 7 [Prunus mume]
PaF106G0300014581.01	6722	2605	3292	13024	13754	11448	67.0654	31.0962	33.8754	141.419	160.173	114.35	6.68976e-05	1.32811	up	[GI]	Carbohydrate transport and metabolism;; Lipid transport and metabolism	Molecular Function: enzyme inhibitor activity (GO:0004857);; Cellular Component: integral component of membrane (GO:0016021);; Molecular Function: pectinesterase activity (GO:0030599);; Biological Process: cell wall modification (GO:0042545);; Molecular Function: aspartyl esterase activity (GO:0045330);; Biological Process: pectin catabolic process (GO:0045490);;	K01051|0.0e+00|pmum:103327267|K01051 pectinesterase [EC:3.1.1.11] | (RefSeq) pectinesterase	Pentose and glucuronate interconversions (ko00040)	--	--	Pectinesterase	Pectinesterase 4 OS=Arabidopsis thaliana OX=3702 GN=PME4 PE=2 SV=1	G	Carbohydrate transport and metabolism	unnamed protein product [Prunus armeniaca]
PaF106G0800032576.01	62	41	51	291	157	310	1.1453	0.850635	0.843802	5.77375	3.25958	5.69557	8.16492e-17	2.07741	up	[P]	Inorganic ion transport and metabolism	Molecular Function: carbonate dehydratase activity (GO:0004089);; Molecular Function: zinc ion binding (GO:0008270);; Biological Process: cyanate catabolic process (GO:0009440);; Biological Process: carbon utilization (GO:0015976);;	K01673|1.5e-144|pmum:103341852|K01673 carbonic anhydrase [EC:4.2.1.1] | (RefSeq) carbonic anhydrase 2-like	Nitrogen metabolism (ko00910)	[P]	Inorganic ion transport and metabolism	Carbonic anhydrase	Beta carbonic anhydrase 2, chloroplastic OS=Arabidopsis thaliana OX=3702 GN=BCA2 PE=1 SV=3	P	Inorganic ion transport and metabolism	unnamed protein product [Prunus armeniaca]
PaF106G0600022891.01	1013	623	652	1185	2074	1657	6.81142	4.97631	4.59524	8.56026	16.0339	11.0716	0.000460436	1.02157	up	[T]	Signal transduction mechanisms	Molecular Function: protein serine/threonine kinase activity (GO:0004674);; Molecular Function: ATP binding (GO:0005524);; Cellular Component: plasma membrane (GO:0005886);; Biological Process: protein autophosphorylation (GO:0046777);;	K13416|1.0e-44|cam:101506449|K13416 brassinosteroid insensitive 1-associated receptor kinase 1 [EC:2.7.10.1 2.7.11.1] | (RefSeq) BRASSINOSTEROID INSENSITIVE 1-associated receptor kinase 1	MAPK signaling pathway - plant (ko04016);; Plant hormone signal transduction (ko04075);; Plant-pathogen interaction (ko04626)	--	--	Protein tyrosine and serine/threonine kinase	Probable LRR receptor-like serine/threonine-protein kinase At1g53430 OS=Arabidopsis thaliana OX=3702 GN=At1g53430 PE=1 SV=1	T	Signal transduction mechanisms	PREDICTED: probable LRR receptor-like serine/threonine-protein kinase At1g53420 [Prunus mume]
PaF106G0300013421.01	1674	961	1588	415	421	546	24.5119	15.8937	26.1386	6.80248	8.09765	7.89879	1.42649e-21	-1.44864	down	--	--	Molecular Function: DNA binding (GO:0003677);; Molecular Function: transcription factor activity, sequence-specific DNA binding (GO:0003700);; Cellular Component: nucleus (GO:0005634);;	K09285|1.9e-122|pper:18784307|K09285 AP2-like factor, ANT lineage | (RefSeq) AP2-like ethylene-responsive transcription factor At1g16060	--	--	--	AP2 domain	AP2-like ethylene-responsive transcription factor At1g16060 OS=Arabidopsis thaliana OX=3702 GN=At1g16060 PE=2 SV=1	K	Transcription	unnamed protein product [Prunus armeniaca]
PaF106G0200008354.01	49	34	27	221	254	210	0.290944	0.293786	0.162073	1.7599	1.97258	1.70033	9.79627e-22	2.38816	up	[R]	General function prediction only	Biological Process: signal transduction (GO:0007165);; Molecular Function: ADP binding (GO:0043531);;	K00695|1.1e-114|mtr:MTR_6g478030|K00695 sucrose synthase [EC:2.4.1.13] | (RefSeq) sucrose synthase	Starch and sucrose metabolism (ko00500)	--	--	TIR domain	Disease resistance protein RUN1 OS=Vitis rotundifolia OX=103349 GN=RUN1 PE=1 SV=1	S	Function unknown	TMV resistance protein N isoform X1 [Prunus persica]
PaF106G0400016598.01	1140	878	995	1	2	3	14.0778	12.9004	12.6123	0.013228	0.025059	0.025432	1.72268e-139	-6.64688	down	--	--	Molecular Function: transferase activity, transferring acyl groups other than amino-acyl groups (GO:0016747);;	K13065|3.3e-94|pavi:110771447|K13065 shikimate O-hydroxycinnamoyltransferase [EC:2.3.1.133] | (RefSeq) BAHD acyltransferase At5g47980-like	Phenylpropanoid biosynthesis (ko00940);; Flavonoid biosynthesis (ko00941);; Stilbenoid, diarylheptanoid and gingerol biosynthesis (ko00945)	--	--	Transferase family	Salutaridinol 7-O-acetyltransferase OS=Papaver somniferum OX=3469 GN=SALAT PE=1 SV=1	S	Function unknown	PREDICTED: BAHD acyltransferase At5g47980-like [Prunus mume]
PaF106G0600024411.01	783	734	819	1639	1685	1827	12.6102	13.7596	13.1831	28.2489	30.6062	28.7896	3.89375e-33	1.20544	up	--	--	Molecular Function: DNA binding (GO:0003677);; Cellular Component: nucleus (GO:0005634);;	--	--	[O]	Posttranslational modification, protein turnover, chaperones	--	Protein REVEILLE 8 OS=Arabidopsis thaliana OX=3702 GN=RVE8 PE=2 SV=1	K	Transcription	unnamed protein product [Prunus armeniaca]
PaF106G0600025594.01	323	347	263	97	100	110	2.74717	3.52556	2.301	0.889127	0.987465	0.929556	9.94609e-12	-1.40296	down	--	--	Molecular Function: molecular_function (GO:0003674);; Molecular Function: transcription factor activity, sequence-specific DNA binding (GO:0003700);; Biological Process: regulation of transcription, DNA-templated (GO:0006355);; Biological Process: biological_process (GO:0008150);; Biological Process: regulation of biosynthetic process (GO:0009889);; Biological Process: regulation of gene expressi…	--	--	[P]	Inorganic ion transport and metabolism	Tesmin/TSO1-like CXC domain, cysteine-rich domain	CRC domain-containing protein TSO1 OS=Arabidopsis thaliana OX=3702 GN=TSO1 PE=1 SV=1	P	Inorganic ion transport and metabolism	unnamed protein product [Prunus armeniaca]
PaF106G0700029172.01	309	245	322	589	651	538	5.60862	5.31754	6.03902	11.6411	13.8032	9.79755	1.99137e-10	1.06933	up	--	--	Molecular Function: calcium ion binding (GO:0005509);; Molecular Function: calcium-dependent phospholipid binding (GO:0005544);; Cellular Component: cytoplasm (GO:0005737);;	K17098|1.9e-181|pmum:103339016|K17098 annexin D | (RefSeq) annexin A13-like	--	[U]	Intracellular trafficking, secretion, and vesicular transport	Annexin	Annexin D2 OS=Arabidopsis thaliana OX=3702 GN=ANN2 PE=1 SV=1	U	Intracellular trafficking, secretion, and vesicular transport	PREDICTED: annexin A13-like [Prunus mume]
PaF106G0700026579.01	436	363	377	99	106	102	8.43112	8.39944	7.50679	2.06748	2.39252	1.9592	4.18794e-23	-1.73526	down	[R]	General function prediction only	Molecular Function: O-methyltransferase activity (GO:0008171);; Biological Process: methylation (GO:0032259);;	K00588|3.9e-131|pavi:110750978|K00588 caffeoyl-CoA O-methyltransferase [EC:2.1.1.104] | (RefSeq) probable caffeoyl-CoA O-methyltransferase At4g26220	Phenylpropanoid biosynthesis (ko00940);; Flavonoid biosynthesis (ko00941);; Stilbenoid, diarylheptanoid and gingerol biosynthesis (ko00945)	[Q]	Secondary metabolites biosynthesis, transport and catabolism	O-methyltransferase	Probable caffeoyl-CoA O-methyltransferase At4g26220 OS=Arabidopsis thaliana OX=3702 GN=At4g26220 PE=2 SV=1	Q	Secondary metabolites biosynthesis, transport and catabolism	probable caffeoyl-CoA O-methyltransferase At4g26220 [Prunus avium]
PaF106G0300013726.01	611	510	631	155	116	179	8.64842	8.64973	9.2219	2.38025	1.91021	2.52706	5.92018e-30	-1.79049	down	[P]	Inorganic ion transport and metabolism	Molecular Function: molybdate ion transmembrane transporter activity (GO:0015098);; Cellular Component: integral component of membrane (GO:0016021);;	--	--	--	--	Molybdate transporter of MFS superfamily	Molybdate transporter 2 OS=Arabidopsis thaliana OX=3702 GN=MOT2 PE=1 SV=2	S	Function unknown	PREDICTED: molybdate transporter 2 [Prunus mume]
PaF106G0600021834.01	1649	1444	1601	5848	5947	7663	17.5455	18.1678	17.3721	67.2737	73.1618	80.7843	3.59808e-156	2.107	up	--	--	Biological Process: phototropism (GO:0009638);;	--	--	--	--	NPH3 family	Root phototropism protein 2 OS=Arabidopsis thaliana OX=3702 GN=RPT2 PE=1 SV=2	S	Function unknown	unnamed protein product [Prunus armeniaca]
PaF106G0500021274.01	924	493	743	1619	1525	1989	17.3931	11.1012	14.4241	33.1661	33.5168	37.4807	1.09662e-19	1.29799	up	[T]	Signal transduction mechanisms	Molecular Function: acid phosphatase activity (GO:0003993);; Molecular Function: ferrous iron binding (GO:0008198);; Molecular Function: ferric iron binding (GO:0008199);; Cellular Component: integral component of membrane (GO:0016021);;	K14379|6.0e-191|pmum:103338913|K14379 tartrate-resistant acid phosphatase type 5 [EC:3.1.3.2] | (RefSeq) purple acid phosphatase 3-like	Riboflavin metabolism (ko00740)	[O]	Posttranslational modification, protein turnover, chaperones	Calcineurin-like phosphoesterase	Purple acid phosphatase 3 OS=Arabidopsis thaliana OX=3702 GN=PAP3 PE=2 SV=1	O	Posttranslational modification, protein turnover, chaperones	unnamed protein product [Prunus armeniaca]
PaF106G0500018895.01	16	15	17	68	69	94	0.849212	0.959015	0.957733	4.14521	4.49989	5.32259	1.11027e-08	1.81546	up	--	--	Biological Process: defense response (GO:0006952);; Molecular Function: ADP binding (GO:0043531);;	K13457|2.5e-46|pmum:103336813|K13457 disease resistance protein RPM1 | (RefSeq) disease resistance protein RPM1-like	Plant-pathogen interaction (ko04626)	--	--	--	--	T	Signal transduction mechanisms	unnamed protein product [Prunus armeniaca]
Prunus_sibirica_newGene_317	186	140	181	338	344	408	1.94227	1.82233	2.07627	4.27654	4.54601	4.12523	3.73273e-12	1.13647	up	[M]	Cell wall/membrane/envelope biogenesis	Molecular Function: protein serine/threonine kinase activity (GO:0004674);; Molecular Function: ATP binding (GO:0005524);; Cellular Component: plasma membrane (GO:0005886);; Cellular Component: integral component of membrane (GO:0016021);; Biological Process: protein autophosphorylation (GO:0046777);;	K13418|1.0e-70|oeu:111372301|K13418 somatic embryogenesis receptor kinase 1 [EC:2.7.10.1 2.7.11.1] | (RefSeq) somatic embryogenesis receptor kinase 2	--	--	--	Protein kinase domain	Probable LRR receptor-like serine/threonine-protein kinase At1g56140 OS=Arabidopsis thaliana OX=3702 GN=At1g56140 PE=2 SV=2	T	Signal transduction mechanisms	probable LRR receptor-like serine/threonine-protein kinase At1g56130 [Prunus dulcis]
PaF106G0300013691.01	202	166	209	40	56	95	6.76724	6.53793	7.04697	1.36701	2.1191	3.10107	3.54285e-07	-1.32691	down	--	--	Molecular Function: structural constituent of ribosome (GO:0003735);; Cellular Component: ribosome (GO:0005840);; Biological Process: translation (GO:0006412);; Cellular Component: chloroplast (GO:0009507);; Molecular Function: rRNA binding (GO:0019843);;	K19035|6.3e-63|pper:18783512|K19035 50S ribosomal protein 6 | (RefSeq) 50S ribosomal protein 6, chloroplastic isoform X1	--	--	--	Family of unknown function (DUF5323)	50S ribosomal protein 6, chloroplastic OS=Arabidopsis thaliana OX=3702 GN=PSRP6 PE=3 SV=1	J	Translation, ribosomal structure and biogenesis	unnamed protein product [Prunus armeniaca]
PaF106G0100006172.01	65	42	52	17	17	15	2.60735	1.99739	2.15057	0.703964	0.796694	0.574712	0.00106201	-1.15768	down	--	--	Cellular Component: integral component of membrane (GO:0016021);;	--	--	--	--	--	--	--	--	hypothetical protein PRUPE_1G012600 [Prunus persica]
PaF106G0200010540.01	305	238	313	12	21	21	2.99745	2.79503	3.17306	0.122113	0.232182	0.205865	5.97056e-43	-3.37127	down	--	--	Molecular Function: antiporter activity (GO:0015297);; Cellular Component: integral component of membrane (GO:0016021);; Molecular Function: xenobiotic transporter activity (GO:0042910);;	K03327|9.1e-101|pavi:110767637|K03327 multidrug resistance protein, MATE family | (RefSeq) protein DETOXIFICATION 35-like	--	[R]	General function prediction only	MatE	Protein DETOXIFICATION 35 OS=Arabidopsis thaliana OX=3702 GN=DTX35 PE=1 SV=1	V	Defense mechanisms	PREDICTED: DETOXIFICATION [Prunus dulcis]
PaF106G0400017975.01	4	6	8	121	146	182	0.029978	0.057669	0.058029	1.09938	1.4212	1.50624	6.42792e-31	3.53377	up	[T]	Signal transduction mechanisms	Molecular Function: protein serine/threonine kinase activity (GO:0004674);; Molecular Function: ATP binding (GO:0005524);; Cellular Component: integral component of membrane (GO:0016021);; Biological Process: recognition of pollen (GO:0048544);;	K24104|2.4e-74|thj:104799061|K24104 GPN-loop GTPase | (RefSeq) LOW QUALITY PROTEIN: uncharacterized protein LOC104799061	--	--	--	Protein tyrosine and serine/threonine kinase	G-type lectin S-receptor-like serine/threonine-protein kinase At1g61500 OS=Arabidopsis thaliana OX=3702 GN=At1g61500 PE=2 SV=2	S	Function unknown	PREDICTED: G-type lectin S-receptor-like serine/threonine-protein kinase At1g61500 [Prunus mume]
PaF106G0200007291.01	224	201	169	104	32	72	0.800094	0.867162	0.629193	0.40636	0.130397	0.257413	9.47261e-05	-1.17743	down	[R]	General function prediction only	Molecular Function: ADP binding (GO:0043531);;	K12818|8.0e-169|mtr:MTR_0267s0070|K12818 ATP-dependent RNA helicase DHX8/PRP22 [EC:3.6.4.13] | (RefSeq) NB-ARC domain disease resistance protein, putative	Spliceosome (ko03040)	[T]	Signal transduction mechanisms	NB-ARC domain	Putative disease resistance RPP13-like protein 1 OS=Arabidopsis thaliana OX=3702 GN=RPPL1 PE=3 SV=1	T	Signal transduction mechanisms	PREDICTED: LOW QUALITY PROTEIN: putative disease resistance RPP13-like protein 1 [Prunus mume]
PaF106G0200007733.01	402	314	368	72	63	74	8.09427	7.61716	7.56273	1.22008	1.48181	1.38147	6.39262e-31	-2.13116	down	--	--	Biological Process: lipid metabolic process (GO:0006629);; Cellular Component: integral component of membrane (GO:0016021);; Molecular Function: oxidoreductase activity, acting on the CH-CH group of donors (GO:0016627);;	K10258|9.3e-14|ccp:CHC_T00008438001|K10258 very-long-chain enoyl-CoA reductase [EC:1.3.1.93] | (RefSeq) trans-2-enoyl-CoA reductase (NADPH)	Fatty acid elongation (ko00062);; Biosynthesis of unsaturated fatty acids (ko01040);; Fatty acid metabolism (ko01212)	[I]	Lipid transport and metabolism	3-oxo-5-alpha-steroid 4-dehydrogenase	Steroid 5-alpha-reductase DET2 OS=Gossypium hirsutum OX=3635 GN=DET2 PE=1 SV=1	I	Lipid transport and metabolism	very-long-chain enoyl-CoA reductase-like isoform X1 [Prunus dulcis]
PaF106G0300012211.01	45	56	80	110	175	206	1.36571	2.02727	2.52455	3.66203	6.24931	6.31428	8.10139e-06	1.27065	up	--	--	Cellular Component: integral component of membrane (GO:0016021);;	--	--	--	--	--	--	--	--	unnamed protein product [Prunus armeniaca]
PaF106G0200008433.01	3	2	4	89	109	127	0.064056	0.035793	0.058478	1.68477	2.28736	2.43151	5.89237e-26	3.48807	up	--	--	Biological Process: signal transduction (GO:0007165);; Molecular Function: ADP binding (GO:0043531);;	K13459|8.6e-23|vvi:100265494|K13459 disease resistance protein RPS2 | (RefSeq) probable disease resistance protein At1g52660	Plant-pathogen interaction (ko04626)	--	--	TIR domain	Disease resistance protein RUN1 OS=Vitis rotundifolia OX=103349 GN=RUN1 PE=1 SV=1	S	Function unknown	disease resistance protein RUN1-like [Prunus dulcis]
PaF106G0600022479.01	0	0	0	104	102	89	0	0	0	5.05333	5.29782	3.96598	1.61302e-28	3.89112	up	--	--	Molecular Function: phospholipid transporter activity (GO:0005548);; Biological Process: phospholipid transport (GO:0015914);;	--	--	--	--	Phosphatidylinositol transfer protein	--	--	--	uncharacterized protein LOC110752785 isoform X2 [Prunus avium]
PaF106G0100002451.01	471	499	503	226	190	248	2.77149	3.54921	3.15214	1.44639	1.30482	1.46154	1.44784e-10	-1.02337	down	[L]	Replication, recombination and repair	Molecular Function: helicase activity (GO:0004386);;	K10706|3.7e-255|vvi:100262126|K10706 senataxin [EC:3.6.4.-] | (RefSeq) uncharacterized LOC100262126	--	[A]	RNA processing and modification	AAA domain	--	A	RNA processing and modification	PREDICTED: uncharacterized protein LOC103322333 [Prunus mume]
PaF106G0200007843.01	650	656	577	180	275	236	10.7324	12.9596	9.82305	3.23538	5.29922	3.8971	4.67244e-12	-1.27263	down	--	--	Cellular Component: Golgi apparatus (GO:0005794);; Molecular Function: O-acetyltransferase activity (GO:0016413);;	K23877|6.9e-42|boe:106296478|K23877 xyloglucan O-acetyltransferase | (RefSeq) protein ALTERED XYLOGLUCAN 4-like	--	--	--	GDSL/SGNH-like Acyl-Esterase family found in Pmr5 and Cas1p	Protein trichome birefringence-like 36 OS=Arabidopsis thaliana OX=3702 GN=TBL36 PE=2 SV=1	S	Function unknown	PREDICTED: protein trichome birefringence-like 36 [Prunus mume]
PaF106G0700028608.01	22	4	12	67	72	97	0.321953	0.059282	0.173646	1.04287	1.19557	1.3873	3.8862e-08	1.91953	up	--	--	Molecular Function: DNA binding (GO:0003677);; Cellular Component: nucleus (GO:0005634);;	--	--	--	--	B3 DNA binding domain	B3 domain-containing transcription factor VRN1 OS=Arabidopsis thaliana OX=3702 GN=VRN1 PE=1 SV=1	K	Transcription	PREDICTED: B3 domain-containing transcription factor VRN1-like isoform X1 [Prunus mume]
PaF106G0200010395.01	115	100	69	13	9	4	1.53577	1.63577	0.989459	0.167191	0.173593	0.040799	1.53479e-11	-2.31655	down	--	--	Biological Process: fatty acid biosynthetic process (GO:0006633);; Cellular Component: membrane (GO:0016020);; Molecular Function: transferase activity, transferring acyl groups other than amino-acyl groups (GO:0016747);;	K15397|9.4e-189|pper:18786164|K15397 3-ketoacyl-CoA synthase [EC:2.3.1.199] | (RefSeq) 3-ketoacyl-CoA synthase 5	Fatty acid elongation (ko00062);; Plant-pathogen interaction (ko04626)	--	--	FAE1/Type III polyketide synthase-like protein	3-ketoacyl-CoA synthase 5 OS=Arabidopsis thaliana OX=3702 GN=KCS5 PE=2 SV=1	I	Lipid transport and metabolism	hypothetical protein PRUPE_2G285400 [Prunus persica]
PaF106G0600023788.01	299	369	549	886	922	1189	10.4397	15.433	19.7746	33.7128	37.6417	41.6375	1.73141e-11	1.27995	up	--	--	Cellular Component: integral component of membrane (GO:0016021);;	--	--	--	--	--	--	--	--	unnamed protein product [Prunus armeniaca]
PaF106G0600024634.01	506	410	465	849	859	1186	4.75955	4.60859	4.50726	8.69861	9.78282	11.7408	3.25514e-20	1.11697	up	[T]	Signal transduction mechanisms	Molecular Function: protein kinase activity (GO:0004672);; Molecular Function: ATP binding (GO:0005524);; Cellular Component: integral component of membrane (GO:0016021);; Molecular Function: carbohydrate binding (GO:0030246);;	K01176|1.1e-69|sbi:8065370|K01176 alpha-amylase [EC:3.2.1.1] | (RefSeq) alpha-amylase isozyme 2A	Starch and sucrose metabolism (ko00500)	--	--	Legume lectin domain	L-type lectin-domain containing receptor kinase IV.1 OS=Arabidopsis thaliana OX=3702 GN=LECRK41 PE=2 SV=1	T	Signal transduction mechanisms	PREDICTED: L-type lectin-domain containing receptor kinase IV.1-like [Prunus mume]
PaF106G0200008233.01	22	12	12	62	44	52	0.403051	0.257908	0.226803	1.27182	0.961983	0.979233	0.000166069	1.3399	up	--	--	Molecular Function: transcription regulatory region sequence-specific DNA binding (GO:0000976);; Molecular Function: RNA polymerase II regulatory region sequence-specific DNA binding (GO:0000977);; Molecular Function: RNA polymerase II transcription factor activity, sequence-specific DNA binding (GO:0000981);; Molecular Function: core promoter proximal region sequence-specific DNA binding (GO:000…	K09264|4.3e-09|psom:113281851|K09264 MADS-box transcription factor, plant | (RefSeq) agamous-like MADS-box protein AGL9 homolog isoform X1	--	[K]	Transcription	SRF-type transcription factor (DNA-binding and dimerisation domain)	Agamous-like MADS-box protein AGL82 OS=Arabidopsis thaliana OX=3702 GN=AGL82 PE=1 SV=1	K	Transcription	PREDICTED: MADS-box transcription factor 50-like [Prunus mume]
PaF106G0400017681.01	27	39	19	53	83	82	0.640257	1.11207	0.454299	1.38307	2.32921	1.96839	0.00196725	1.07121	up	--	--	Molecular Function: transcription factor activity, sequence-specific DNA binding (GO:0003700);;	--	--	--	--	TCP family transcription factor	Transcription factor TCP3 OS=Arabidopsis thaliana OX=3702 GN=TCP3 PE=1 SV=1	K	Transcription	unnamed protein product [Prunus armeniaca]
PaF106G0600021860.01	68	72	104	11	12	22	2.16321	2.75134	3.40458	0.370904	0.426945	0.674314	1.59348e-07	-1.75714	down	--	--	Biological Process: lipid transport (GO:0006869);; Molecular Function: lipid binding (GO:0008289);; Cellular Component: integral component of membrane (GO:0016021);;	--	--	--	--	--	--	T	Signal transduction mechanisms	lipid transfer protein 1 [Prunus dulcis]
PaF106G0200008425.01	22	16	13	67	121	88	0.185629	0.160675	0.104951	0.60765	1.18548	0.741675	5.91887e-09	1.91032	up	[R]	General function prediction only	Biological Process: signal transduction (GO:0007165);; Molecular Function: ADP binding (GO:0043531);;	K00695|7.1e-81|mtr:MTR_6g478030|K00695 sucrose synthase [EC:2.4.1.13] | (RefSeq) sucrose synthase	Starch and sucrose metabolism (ko00500)	--	--	NB-ARC domain	Disease resistance protein RUN1 OS=Vitis rotundifolia OX=103349 GN=RUN1 PE=1 SV=1	--	--	TMV resistance protein N-like [Prunus avium]
PaF106G0100004690.01	338	240	346	102	101	145	2.429	2.06203	2.56443	0.795173	0.843903	1.04168	3.93231e-10	-1.2288	down	--	--	Molecular Function: ligand-gated ion channel activity (GO:0015276);; Cellular Component: integral component of membrane (GO:0016021);;	K05387|3.3e-182|pmum:103320898|K05387 glutamate receptor, ionotropic, plant | (RefSeq) glutamate receptor 2.8-like	--	[PET]	Inorganic ion transport and metabolism;; Amino acid transport and metabolism;; Signal transduction mechanisms	Receptor family ligand binding region	Glutamate receptor 2.2 OS=Arabidopsis thaliana OX=3702 GN=GLR2.2 PE=2 SV=1	--	--	unnamed protein product [Prunus armeniaca]
PaF106G0800031951.01	5278	4577	5250	2233	2011	2206	54.6878	57.5557	56.3627	26.0303	25.1191	23.5679	5.76505e-40	-1.12099	down	[F]	Nucleotide transport and metabolism	Molecular Function: magnesium ion binding (GO:0000287);; Molecular Function: adenylosuccinate synthase activity (GO:0004019);; Molecular Function: GTP binding (GO:0005525);; Cellular Component: cytoplasm (GO:0005737);; Cellular Component: chloroplast (GO:0009507);; Biological Process: 'de novo' AMP biosynthetic process (GO:0044208);; Biological Process: IMP metabolic process (GO:0046040);;	K01939|5.6e-286|pper:18768320|K01939 adenylosuccinate synthase [EC:6.3.4.4] | (RefSeq) adenylosuccinate synthetase 2, chloroplastic	Purine metabolism (ko00230);; Alanine, aspartate and glutamate metabolism (ko00250)	[F]	Nucleotide transport and metabolism	Adenylosuccinate synthetase	Adenylosuccinate synthetase 2, chloroplastic OS=Ricinus communis OX=3988 GN=PURA2 PE=3 SV=1	F	Nucleotide transport and metabolism	unnamed protein product [Prunus armeniaca]
PaF106G0400016376.01	231	166	181	62	66	80	1.57084	1.3521	1.26813	0.453107	0.522118	0.545482	2.21724e-08	-1.2536	down	--		Molecular Function: protein kinase activity (GO:0004672);; Molecular Function: ATP binding (GO:0005524);; Cellular Component: integral component of membrane (GO:0016021);;	K13430|1.9e-68|sind:105176230|K13430 serine/threonine-protein kinase PBS1 [EC:2.7.11.1] | (RefSeq) probable serine/threonine-protein kinase PBL7 isoform X1	Plant-pathogen interaction (ko04626)	--	--	Protein tyrosine and serine/threonine kinase	Probable leucine-rich repeat receptor-like serine/threonine-protein kinase At3g14840 OS=Arabidopsis thaliana OX=3702 GN=LRR-RLK PE=1 SV=1	T	Signal transduction mechanisms	probable leucine-rich repeat receptor-like serine/threonine-protein kinase At3g14840 isoform X2 [Prunus persica]
PaF106G0500020568.01	44	113	138	283	205	276	0.445764	1.39191	1.46387	3.16386	2.46319	2.83635	0.000117303	1.16959	up	--	--	Molecular Function: ubiquitin-protein transferase activity (GO:0004842);;	K10260|1.9e-19|mpp:MICPUCDRAFT_56233|K10260 F-box and WD-40 domain protein 7 | (RefSeq) WD40 repeat protein	Ubiquitin mediated proteolysis (ko04120)	[S]	Function unknown	U-box domain	U-box domain-containing protein 18 OS=Arabidopsis thaliana OX=3702 GN=PUB18 PE=1 SV=1	S	Function unknown	unnamed protein product [Prunus armeniaca]
PaF106G0100004499.01	820	1034	918	429	302	475	18.0196	27.1795	20.8004	10.2545	7.72403	10.4388	3.46432e-10	-1.07726	down	[FV]	Nucleotide transport and metabolism;; Defense mechanisms	Molecular Function: magnesium ion binding (GO:0000287);; Molecular Function: dUTP diphosphatase activity (GO:0004170);; Biological Process: dUMP biosynthetic process (GO:0006226);; Biological Process: dUTP catabolic process (GO:0046081);;	K01520|1.8e-118|pmum:103320833|K01520 dUTP pyrophosphatase [EC:3.6.1.23] | (RefSeq) deoxyuridine 5'-triphosphate nucleotidohydrolase	Pyrimidine metabolism (ko00240)	[F]	Nucleotide transport and metabolism	dUTPase	Deoxyuridine 5'-triphosphate nucleotidohydrolase OS=Arabidopsis thaliana OX=3702 GN=DUT PE=1 SV=1	F	Nucleotide transport and metabolism	unnamed protein product [Prunus armeniaca]
PaF106G0400016590.01	1717	1159	1512	20	28	24	26.4761	21.3897	24.0398	0.334843	0.501049	0.357655	2.83194e-185	-5.38779	down	--	--	Molecular Function: transferase activity, transferring acyl groups other than amino-acyl groups (GO:0016747);;	K13065|4.7e-118|pavi:110771447|K13065 shikimate O-hydroxycinnamoyltransferase [EC:2.3.1.133] | (RefSeq) BAHD acyltransferase At5g47980-like	Phenylpropanoid biosynthesis (ko00940);; Flavonoid biosynthesis (ko00941);; Stilbenoid, diarylheptanoid and gingerol biosynthesis (ko00945)	--	--	Transferase family	BAHD acyltransferase BIA1 OS=Arabidopsis thaliana OX=3702 GN=BIA1 PE=2 SV=1	S	Function unknown	BAHD acyltransferase At5g47980-like [Prunus dulcis]
PaF106G0100003751.01	1328	1191	1542	3369	2786	2933	18.9608	20.353	22.711	52.3594	46.4481	41.9405	1.09112e-23	1.22245	up	[E]	Amino acid transport and metabolism	Biological Process: glutamine metabolic process (GO:0006541);; Molecular Function: hydrolase activity (GO:0016787);;	--	--	--	--	Peptidase C26	Putative glutamine amidotransferase GAT1_2.1 OS=Arabidopsis thaliana OX=3702 GN=GAT1_2.1 PE=2 SV=1	F	Nucleotide transport and metabolism	unnamed protein product [Prunus armeniaca]
PaF106G0200006850.01	5	0	13	89	83	105	0.045784	0	0.13018	0.961573	0.96043	1.03951	2.99192e-13	2.58823	up	--	--	Molecular Function: oxidoreductase activity, acting on single donors with incorporation of molecular oxygen, incorporation of two atoms of oxygen (GO:0016702);; Biological Process: oxylipin biosynthetic process (GO:0031408);; Molecular Function: metal ion binding (GO:0046872);;	K00454|0.0e+00|pper:18784763|K00454 lipoxygenase [EC:1.13.11.12] | (RefSeq) linoleate 13S-lipoxygenase 2-1, chloroplastic	Linoleic acid metabolism (ko00591);; alpha-Linolenic acid metabolism (ko00592)	--	--	Lipoxygenase	Linoleate 13S-lipoxygenase 2-1, chloroplastic OS=Solanum tuberosum OX=4113 GN=LOX2.1 PE=1 SV=1	E	Amino acid transport and metabolism	linoleate 13S-lipoxygenase 2-1, chloroplastic-like [Prunus dulcis]
PaF106G0100006405.01	770	538	702	234	176	230	11.509	9.68738	10.8412	3.73634	3.05343	3.40919	1.04163e-22	-1.48933	down	--	--	Molecular Function: UDP-glycosyltransferase activity (GO:0008194);; Cellular Component: intracellular membrane-bounded organelle (GO:0043231);;	K22845|8.8e-243|pper:18789439|K22845 phlorizin synthase [EC:2.4.1.357] | (RefSeq) UDP-glycosyltransferase 88F5	Flavonoid biosynthesis (ko00941)	[GC]	Carbohydrate transport and metabolism;; Energy production and conversion	UDP-glucoronosyl and UDP-glucosyl transferase	UDP-glycosyltransferase 88F5 OS=Malus domestica OX=3750 GN=UGT88F5 PE=2 SV=1	--	--	unnamed protein product [Prunus armeniaca]
PaF106G0400017491.01	325	323	361	1231	1532	1930	2.23167	2.62097	2.47333	8.92741	12.0212	12.9298	2.2585e-57	2.20834	up	[M]	Cell wall/membrane/envelope biogenesis	Molecular Function: protein serine/threonine kinase activity (GO:0004674);; Molecular Function: ATP binding (GO:0005524);; Cellular Component: plasma membrane (GO:0005886);; Cellular Component: integral component of membrane (GO:0016021);; Biological Process: protein autophosphorylation (GO:0046777);;	K13416|1.4e-50|han:110928984|K13416 brassinosteroid insensitive 1-associated receptor kinase 1 [EC:2.7.10.1 2.7.11.1] | (RefSeq) BRASSINOSTEROID INSENSITIVE 1-associated receptor kinase 1-like isoform X1	MAPK signaling pathway - plant (ko04016);; Plant hormone signal transduction (ko04075);; Plant-pathogen interaction (ko04626)	--	--	Protein tyrosine and serine/threonine kinase	Probable LRR receptor-like serine/threonine-protein kinase At1g07650 OS=Arabidopsis thaliana OX=3702 GN=At1g07650 PE=1 SV=1	T	Signal transduction mechanisms	PREDICTED: probable leucine-rich repeat receptor-like serine/threonine-protein kinase At3g14840 [Prunus mume]
PaF106G0800030813.01	79	69	53	6	21	14	1.64416	1.79427	1.12597	0.221075	0.384153	0.196944	3.44161e-05	-1.49968	down	--	--	Molecular Function: serine-type carboxypeptidase activity (GO:0004185);; Molecular Function: transferase activity, transferring acyl groups other than amino-acyl groups (GO:0016747);; Biological Process: secondary metabolic process (GO:0019748);;	K16296|6.3e-143|pper:18768693|K16296 serine carboxypeptidase-like clade I [EC:3.4.16.-] | (RefSeq) serine carboxypeptidase-like 13 isoform X2	--	[OE]	Posttranslational modification, protein turnover, chaperones;; Amino acid transport and metabolism	Serine carboxypeptidase	Serine carboxypeptidase-like 18 OS=Arabidopsis thaliana OX=3702 GN=SCPL18 PE=2 SV=2	--	--	serine carboxypeptidase-like 13 isoform X2 [Prunus persica]
PaF106G0100005594.01	282	154	388	47	58	131	3.82406	2.50542	5.44106	0.691551	0.91207	1.77113	2.93106e-06	-1.41329	down	--	--	Biological Process: protein glycosylation (GO:0006486);; Cellular Component: integral component of membrane (GO:0016021);; Molecular Function: transferase activity, transferring glycosyl groups (GO:0016757);;	K18789|3.6e-115|psom:113282164|K18789 xylogalacturonan beta-1,3-xylosyltransferase [EC:2.4.2.41] | (RefSeq) probable glycosyltransferase At5g20260	--	[GMW]	Carbohydrate transport and metabolism;; Cell wall/membrane/envelope biogenesis;; Extracellular structures	Exostosin family	Probable glycosyltransferase At5g25310 OS=Arabidopsis thaliana OX=3702 GN=At5g25310 PE=3 SV=2	--	--	PREDICTED: probable glycosyltransferase At5g25310 [Prunus mume]
PaF106G0600024874.01	127	109	70	242	186	263	2.03131	2.07659	1.14827	4.71245	3.81299	4.5295	2.35066e-06	1.12389	up	--	--	Biological Process: response to molecule of bacterial origin (GO:0002237);; Molecular Function: molecular_function (GO:0003674);; Molecular Function: catalytic activity (GO:0003824);; Molecular Function: protein kinase activity (GO:0004672);; Molecular Function: protein serine/threonine kinase activity (GO:0004674);; Cellular Component: cellular_component (GO:0005575);; Cellular Component: cell (…	K22133|1.9e-10|egr:104443802|K22133 oxalate---CoA ligase [EC:6.2.1.8] | (RefSeq) oxalate--CoA ligase	Glyoxylate and dicarboxylate metabolism (ko00630)	[T]	Signal transduction mechanisms	Protein tyrosine and serine/threonine kinase	Cold-responsive protein kinase 1 OS=Arabidopsis thaliana OX=3702 GN=CRPK1 PE=1 SV=1	T	Signal transduction mechanisms	unnamed protein product [Prunus armeniaca]
PaF106G0600024409.01	737	614	485	1168	1196	1368	9.89103	9.95141	6.80362	17.5261	18.9539	18.411	1.72465e-14	1.07173	up	--	--	Molecular Function: DNA binding (GO:0003677);; Molecular Function: transcription factor activity, sequence-specific DNA binding (GO:0003700);; Cellular Component: nucleus (GO:0005634);;	K09284|2.8e-255|pmum:103337713|K09284 AP2-like factor, euAP2 lineage | (RefSeq) AP2-like ethylene-responsive transcription factor TOE3 isoform X1	--	--	--	AP2 domain	APETALA2-like protein 3 OS=Oryza sativa subsp. japonica OX=39947 GN=AP2-3 PE=1 SV=1	K	Transcription	unnamed protein product [Prunus armeniaca]
PaF106G0400017829.01	273	203	266	0	0	0	6.19329	5.54563	6.18215	0	0	0	6.55516e-57	-5.0889	down	[O]	Posttranslational modification, protein turnover, chaperones	Molecular Function: electron carrier activity (GO:0009055);; Molecular Function: protein disulfide oxidoreductase activity (GO:0015035);;	K07390|8.1e-14|adu:107485934|K07390 monothiol glutaredoxin | (RefSeq) monothiol glutaredoxin-S7, chloroplastic	--	[O]	Posttranslational modification, protein turnover, chaperones	Glutaredoxin	Monothiol glutaredoxin-S11 OS=Oryza sativa subsp. japonica OX=39947 GN=GRXS11 PE=2 SV=2	O	Posttranslational modification, protein turnover, chaperones	monothiol glutaredoxin-S17 [Prunus dulcis]
PaF106G0100004650.01	16	43	28	82	98	135	0.21698	0.698649	0.383846	1.20209	1.53947	1.8282	1.39211e-05	1.44221	up	[G]	Carbohydrate transport and metabolism	Cellular Component: integral component of membrane (GO:0016021);;	--	--	--	--	BT1 family	Probable folate-biopterin transporter 6 OS=Arabidopsis thaliana OX=3702 GN=At5g10820 PE=2 SV=1	S	Function unknown	unnamed protein product [Prunus armeniaca]
PaF106G0100000049.01	37	33	49	98	99	110	0.516557	0.550817	0.708537	1.49449	1.61307	1.54268	1.1899e-05	1.23198	up	--	--	Biological Process: protein import into nucleus (GO:0006606);;	K20222|2.8e-101|pper:18792621|K20222 importin-5 | (RefSeq) ran-binding protein 6	--	--	--	--	--	--	--	hypothetical protein Pyn_41111 [Prunus yedoensis var. nudiflora]
PaF106G0700028233.01	2118	1991	2546	1006	856	1086	32.8413	35.8862	41.9794	16.6848	15.0115	16.2931	9.18958e-21	-1.06566	down	[O]	Posttranslational modification, protein turnover, chaperones	Molecular Function: ATP binding (GO:0005524);; Molecular Function: ATPase activity (GO:0016887);;	K09013|4.5e-189|pmum:103331015|K09013 Fe-S cluster assembly ATP-binding protein | (RefSeq) ABC transporter I family member 6, chloroplastic	--	--	--	ABC transporter	ABC transporter I family member 6, chloroplastic OS=Arabidopsis thaliana OX=3702 GN=ABCI6 PE=1 SV=1	L	Replication, recombination and repair	PREDICTED: ABC transporter I family member 6, chloroplastic [Prunus mume]
PaF106G0600022843.01	384	257	367	12	7	19	7.29839	5.84482	7.18698	0.230494	0.143438	0.356674	1.35587e-53	-3.93023	down	--	--	Molecular Function: DNA binding (GO:0003677);; Molecular Function: protein dimerization activity (GO:0046983);;	--	--	--	--	SRF-type transcription factor (DNA-binding and dimerisation domain)	--	--	--	PREDICTED: uncharacterized protein LOC103326831 isoform X1 [Prunus mume]
PaF106G0700027524.01	2553	2291	2354	5684	4752	7509	35.4779	37.4183	32.785	85.1824	76.9135	103.929	2.76664e-40	1.36252	up	[QV]	Secondary metabolites biosynthesis, transport and catabolism;; Defense mechanisms	Molecular Function: monooxygenase activity (GO:0004497);; Molecular Function: iron ion binding (GO:0005506);; Cellular Component: integral component of membrane (GO:0016021);; Molecular Function: oxidoreductase activity, acting on paired donors, with incorporation or reduction of molecular oxygen (GO:0016705);; Molecular Function: heme binding (GO:0020037);;	K09843|1.4e-122|pmum:107881722|K09843 (+)-abscisic acid 8'-hydroxylase [EC:1.14.14.137] | (RefSeq) abscisic acid 8'-hydroxylase 4-like	Carotenoid biosynthesis (ko00906)	[QI]	Secondary metabolites biosynthesis, transport and catabolism;; Lipid transport and metabolism	Cytochrome P450	Abscisic acid 8'-hydroxylase 4 OS=Arabidopsis thaliana OX=3702 GN=CYP707A4 PE=2 SV=2	--	--	unnamed protein product [Prunus armeniaca]
PaF106G0400018013.01	7	12	8	796	826	1003	0.054452	0.140318	0.07265	8.77564	9.77099	10.1776	9.32427e-146	5.81229	up	--		Molecular Function: protein serine/threonine kinase activity (GO:0004674);; Molecular Function: ATP binding (GO:0005524);; Cellular Component: plasma membrane (GO:0005886);; Biological Process: protein phosphorylation (GO:0006468);; Cellular Component: integral component of membrane (GO:0016021);;	K24104|3.4e-87|thj:104799061|K24104 GPN-loop GTPase | (RefSeq) LOW QUALITY PROTEIN: uncharacterized protein LOC104799061	--	--	--	Protein tyrosine and serine/threonine kinase	Cysteine-rich receptor-like protein kinase 29 OS=Arabidopsis thaliana OX=3702 GN=CRK29 PE=2 SV=1	T	Signal transduction mechanisms	cysteine-rich receptor-like protein kinase 10 [Prunus avium]
PaF106G0600023441.01	588	360	351	137	153	191	4.84177	3.54713	2.97519	1.22463	1.4708	1.56901	4.87191e-10	-1.23979	down	--		Molecular Function: protein serine/threonine kinase activity (GO:0004674);; Molecular Function: ATP binding (GO:0005524);; Cellular Component: integral component of membrane (GO:0016021);;	K13420|4.1e-68|mesc:110601988|K13420 LRR receptor-like serine/threonine-protein kinase FLS2 [EC:2.7.11.1] | (RefSeq) LRR receptor-like serine/threonine-protein kinase FLS2	MAPK signaling pathway - plant (ko04016);; Plant-pathogen interaction (ko04626)	--	--	Protein tyrosine and serine/threonine kinase	G-type lectin S-receptor-like serine/threonine-protein kinase LECRK3 OS=Oryza sativa subsp. indica OX=39946 GN=LECRK3 PE=3 SV=2	T	Signal transduction mechanisms	unnamed protein product [Prunus armeniaca]
PaF106G0400015192.01	269	310	206	26	51	48	3.61045	4.97392	2.85013	0.37295	0.789615	0.643816	7.91039e-17	-2.19949	down	[I]	Lipid transport and metabolism	Molecular Function: phospholipase activity (GO:0004620);; Biological Process: lipid metabolic process (GO:0006629);;	K16818|7.2e-74|atr:18428292|K16818 phospholipase A1 [EC:3.1.1.32] | (RefSeq) phospholipase A(1) DAD1, chloroplastic	Glycerophospholipid metabolism (ko00564);; alpha-Linolenic acid metabolism (ko00592)	[I]	Lipid transport and metabolism	Lipase (class 3)	Phospholipase A1-Igamma3, chloroplastic OS=Arabidopsis thaliana OX=3702 GN=At1g51440 PE=1 SV=1	I	Lipid transport and metabolism	unnamed protein product [Prunus armeniaca]
PaF106G0400016330.01	15	13	2	165	74	115	0.135909	0.136309	0.018505	1.67099	0.79863	1.07617	2.18071e-12	2.45344	up	--	--	Cellular Component: integral component of membrane (GO:0016021);;	K13466|5.4e-22|vvi:100246778|K13466 EIX receptor 1/2 | (RefSeq) receptor-like protein 12	Plant-pathogen interaction (ko04626)	--	--	Leucine rich repeat	Phytosulfokine receptor 1 OS=Arabidopsis thaliana OX=3702 GN=PSKR1 PE=1 SV=4	T	Signal transduction mechanisms	PREDICTED: receptor [Prunus dulcis]
PaF106G0100001908.01	237	204	305	109	86	133	6.7819	6.94909	9.00097	3.43758	2.83529	3.77605	4.44447e-06	-1.00903	down	--	--	Cellular Component: plasmodesma (GO:0009506);; Biological Process: calcium-mediated signaling (GO:0019722);;	--	--	--	--	Rapid ALkalinization Factor (RALF)	Protein RALF-like 24 OS=Arabidopsis thaliana OX=3702 GN=RALFL24 PE=3 SV=1	S	Function unknown	LOW QUALITY PROTEIN: protein RALF-like 24 [Prunus persica]
PaF106G0400014668.01	8	2	6	65	89	77	0.075352	0.020836	0.054744	0.682503	1.00766	0.741039	2.93891e-14	2.63356	up	--	--	Cellular Component: integral component of membrane (GO:0016021);;	K13466|2.8e-12|vvi:100246778|K13466 EIX receptor 1/2 | (RefSeq) receptor-like protein 12	Plant-pathogen interaction (ko04626)	--	--	Leucine rich repeat	Tyrosine-sulfated glycopeptide receptor 1 OS=Arabidopsis thaliana OX=3702 GN=PSY1R PE=1 SV=1	T	Signal transduction mechanisms	receptor like protein 3 [Prunus dulcis]
PaF106G0600024306.01	1585	1255	1055	3381	3228	3586	24.9769	23.6633	17.1478	57.9789	59.3754	56.5811	1.87209e-33	1.44129	up	--	--	Biological Process: metal ion transport (GO:0030001);; Molecular Function: metal ion binding (GO:0046872);;	--	--	[P]	Inorganic ion transport and metabolism	Heavy-metal-associated domain	Heavy metal-associated isoprenylated plant protein 5 OS=Arabidopsis thaliana OX=3702 GN=HIPP05 PE=1 SV=2	P	Inorganic ion transport and metabolism	unnamed protein product [Prunus armeniaca]
PaF106G0800031421.01	719	539	469	10	6	11	9.88456	8.87253	6.64637	0.14901	0.085197	0.149986	8.31025e-89	-4.98001	down	--	--	Molecular Function: protein kinase activity (GO:0004672);; Molecular Function: ion channel activity (GO:0005216);; Molecular Function: ATP binding (GO:0005524);; Cellular Component: integral component of membrane (GO:0016021);;	K05391|6.9e-149|pavi:110770288|K05391 cyclic nucleotide gated channel, plant | (RefSeq) cyclic nucleotide-gated ion channel 1-like	Plant-pathogen interaction (ko04626)	[PT]	Inorganic ion transport and metabolism;; Signal transduction mechanisms	Ion transport protein	Cyclic nucleotide-gated ion channel 1 OS=Arabidopsis thaliana OX=3702 GN=CNGC1 PE=1 SV=1	--	--	unnamed protein product [Prunus armeniaca]
PaF106G0200010348.01	1677	1598	2057	702	809	802	47.3047	53.9569	59.8711	21.5478	26.6161	22.6509	6.26723e-17	-1.08091	down	[J]	Translation, ribosomal structure and biogenesis	Molecular Function: RNA binding (GO:0003723);; Molecular Function: structural constituent of ribosome (GO:0003735);; Biological Process: translation (GO:0006412);; Cellular Component: small ribosomal subunit (GO:0015935);; Cellular Component: cytosolic small ribosomal subunit (GO:0022627);;	K02969|1.9e-29|cic:CICLE_v10006225mg|K02969 small subunit ribosomal protein S20e | (RefSeq) hypothetical protein	Ribosome (ko03010)	[J]	Translation, ribosomal structure and biogenesis	Ribosomal protein S10p/S20e	40S ribosomal protein S20-1 OS=Arabidopsis thaliana OX=3702 GN=RPS20A PE=2 SV=2	J	Translation, ribosomal structure and biogenesis	PREDICTED: 40S ribosomal protein S20-2 [Theobroma cacao]
PaF106G0400018149.01	67	97	99	16	18	23	0.747355	1.29181	1.18055	0.184689	0.224427	0.253001	3.8785e-07	-1.64404	down	[V]	Defense mechanisms	Molecular Function: antiporter activity (GO:0015297);; Cellular Component: membrane (GO:0016020);; Cellular Component: integral component of membrane (GO:0016021);; Molecular Function: transmembrane transporter activity (GO:0022857);; Molecular Function: xenobiotic transporter activity (GO:0042910);;	K03327|1.0e-152|pmum:103324527|K03327 multidrug resistance protein, MATE family | (RefSeq) protein DETOXIFICATION 40-like	--	[R]	General function prediction only	MatE	Protein DETOXIFICATION 40 OS=Arabidopsis thaliana OX=3702 GN=DTX40 PE=1 SV=1	V	Defense mechanisms	PREDICTED: protein DETOXIFICATION 40-like [Prunus mume]
PaF106G0600024535.01	1532	1490	1876	470	506	618	69.6872	81.1108	88.0083	23.2512	26.8272	28.1394	6.37467e-33	-1.49442	down	--	--	Cellular Component: nucleosome (GO:0000786);; Molecular Function: DNA binding (GO:0003677);; Cellular Component: nucleus (GO:0005634);; Biological Process: nucleosome assembly (GO:0006334);; Cellular Component: host cell nucleus (GO:0042025);; Molecular Function: protein heterodimerization activity (GO:0046982);;	K11254|7.1e-50|adu:107458448|K11254 histone H4 | (RefSeq) histone H4	--	[B]	Chromatin structure and dynamics	Centromere kinetochore component CENP-T histone fold	Histone H4 variant TH011 OS=Triticum aestivum OX=4565 PE=3 SV=2	B	Chromatin structure and dynamics	PREDICTED: uncharacterized protein LOC107825453 [Nicotiana tabacum]
Prunus_sibirica_newGene_1574	157	150	151	16	17	23	2.17308	2.47966	2.15607	0.229913	0.267838	0.308667	8.49415e-20	-2.47442	down	--	--	Cellular Component: integral component of membrane (GO:0016021);;	--	--	--	--	--	--	--	--	uncharacterized protein LOC18768678 [Prunus persica]
PaF106G0100005274.01	51	50	48	328	438	345	0.493558	0.574078	0.475279	3.46552	4.95134	3.33617	2.87065e-35	2.70414	up	--	--	Biological Process: telomere maintenance (GO:0000723);; Molecular Function: DNA helicase activity (GO:0003678);; Molecular Function: ATP binding (GO:0005524);; Biological Process: DNA repair (GO:0006281);; Biological Process: DNA recombination (GO:0006310);;	K07466|4.6e-189|pper:18792188|K07466 replication factor A1 | (RefSeq) replication protein A 70 kDa DNA-binding subunit B	DNA replication (ko03030);; Nucleotide excision repair (ko03420);; Mismatch repair (ko03430);; Homologous recombination (ko03440)	--	--	Replication protein A OB domain	--	D	Cell cycle control, cell division, chromosome partitioning	unnamed protein product [Prunus armeniaca]
PaF106G0100000801.01	1242	938	750	3038	2882	4384	22.3366	20.18	13.9124	59.471	60.4912	78.935	1.95581e-36	1.8171	up	[G]	Carbohydrate transport and metabolism	Molecular Function: hydrolase activity, hydrolyzing O-glycosyl compounds (GO:0004553);; Cellular Component: cell wall (GO:0005618);; Biological Process: xyloglucan metabolic process (GO:0010411);; Molecular Function: xyloglucan:xyloglucosyl transferase activity (GO:0016762);; Biological Process: cell wall biogenesis (GO:0042546);; Cellular Component: apoplast (GO:0048046);; Biological Process: ce…	K14504|4.7e-160|pmum:103323608|K14504 xyloglucan:xyloglucosyl transferase TCH4 [EC:2.4.1.207] | (RefSeq) probable xyloglucan endotransglucosylase/hydrolase protein 23	Plant hormone signal transduction (ko04075)	--	--	Glycosyl hydrolases family 16	Probable xyloglucan endotransglucosylase/hydrolase protein 23 OS=Arabidopsis thaliana OX=3702 GN=XTH23 PE=2 SV=1	G	Carbohydrate transport and metabolism	PREDICTED: probable xyloglucan endotransglucosylase/hydrolase protein 23 [Prunus mume]
PaF106G0800032458.01	478	485	529	61	49	76	2.95463	3.3233	2.98875	0.343122	0.294646	0.394482	8.9443e-50	-2.73044	down	--	--	Biological Process: signal transduction (GO:0007165);; Molecular Function: ADP binding (GO:0043531);;	K00695|2.1e-110|mtr:MTR_6g478030|K00695 sucrose synthase [EC:2.4.1.13] | (RefSeq) sucrose synthase	Starch and sucrose metabolism (ko00500)	--	--	TIR domain	Disease resistance protein Roq1 OS=Nicotiana benthamiana OX=4100 GN=ROQ1 PE=1 SV=1	S	Function unknown	PREDICTED: TMV resistance protein N-like [Prunus mume]
PaF106G0300014441.01	92	60	46	110	146	171	0.307841	0.238752	0.15912	0.400407	0.571346	0.575374	0.000232297	1.02575	up	--	--	Molecular Function: ADP binding (GO:0043531);;	K20003|8.3e-17|dzi:111280650|K20003 palmitoyltransferase ZDHHC4 [EC:2.3.1.225] | (RefSeq) uncharacterized protein LOC111280650	--	--	--	Leucine Rich repeats (2 copies)	--	T	Signal transduction mechanisms	PREDICTED: uncharacterized protein LOC103327487 [Prunus mume]
PaF106G0400018009.01	19	9	35	53	90	96	0.7561	0.395615	1.42008	2.30174	4.22195	3.85995	6.53226e-05	1.42517	up	[O]	Posttranslational modification, protein turnover, chaperones	Molecular Function: molecular_function (GO:0003674);; Molecular Function: protein disulfide isomerase activity (GO:0003756);; Molecular Function: catalytic activity (GO:0003824);; Molecular Function: thioredoxin-disulfide reductase activity (GO:0004791);; Cellular Component: cellular_component (GO:0005575);; Cellular Component: intracellular (GO:0005622);; Cellular Component: cell (GO:0005623);; …	K03671|2.0e-65|pmum:103324584|K03671 thioredoxin 1 | (RefSeq) thioredoxin-like protein CXXS1	--	[O]	Posttranslational modification, protein turnover, chaperones	Thioredoxin	Thioredoxin-like protein CXXS1 OS=Arabidopsis thaliana OX=3702 GN=CXXS1 PE=2 SV=2	O	Posttranslational modification, protein turnover, chaperones	unnamed protein product [Prunus armeniaca]
PaF106G0200007470.01	502	348	441	51	75	61	12.8351	10.6577	11.622	1.41904	2.22113	1.55647	6.20686e-35	-2.46785	down	--	--	Molecular Function: protein binding (GO:0005515);;	--	--	--	--	F-box domain	F-box/kelch-repeat protein At3g23880 OS=Arabidopsis thaliana OX=3702 GN=At3g23880 PE=2 SV=1	S	Function unknown	F-box/kelch-repeat protein [Prunus yedoensis var. nudiflora]
PaF106G0100001078.01	216	159	239	29	90	59	5.38154	4.73184	6.14032	0.766092	2.61169	1.4614	7.11392e-06	-1.36228	down	[S]	Function unknown	Cellular Component: extracellular region (GO:0005576);;	K13449|9.6e-40|bdi:100846532|K13449 pathogenesis-related protein 1 | (RefSeq) pathogenesis-related protein 1	MAPK signaling pathway - plant (ko04016);; Plant hormone signal transduction (ko04075);; Plant-pathogen interaction (ko04626)	[S]	Function unknown	Cysteine-rich secretory protein family	Pathogenesis-related protein PR-1 OS=Medicago truncatula OX=3880 GN=PR-1 PE=2 SV=1	S	Function unknown	unnamed protein product [Prunus armeniaca]
PaF106G0300013106.01	80	93	85	3	6	8	1.40552	1.95314	1.54856	0.056897	0.122221	0.13241	7.60259e-15	-2.64127	down	[K]	Transcription	Molecular Function: O-methyltransferase activity (GO:0008171);; Molecular Function: S-adenosylmethionine-dependent methyltransferase activity (GO:0008757);; Biological Process: aromatic compound biosynthetic process (GO:0019438);; Biological Process: methylation (GO:0032259);; Molecular Function: protein dimerization activity (GO:0046983);;	K16040|9.4e-127|qsu:112015373|K16040 trans-resveratrol di-O-methyltransferase [EC:2.1.1.240] | (RefSeq) trans-resveratrol di-O-methyltransferase-like	Stilbenoid, diarylheptanoid and gingerol biosynthesis (ko00945)	[R]	General function prediction only	O-methyltransferase domain	Trans-resveratrol di-O-methyltransferase OS=Vitis vinifera OX=29760 GN=ROMT PE=1 SV=2	S	Function unknown	unnamed protein product [Prunus armeniaca]
PaF106G0700027870.01	145	131	138	482	561	1001	1.73034	1.80765	1.68958	6.13969	7.6325	11.9036	1.02729e-27	2.17764	up	[G]	Carbohydrate transport and metabolism	Molecular Function: hydrolase activity, hydrolyzing O-glycosyl compounds (GO:0004553);; Biological Process: carbohydrate metabolic process (GO:0005975);;	K13031|1.2e-158|pper:18770931|K13031 amygdalin beta-glucosidase [EC:3.2.1.117] | (RefSeq) beta-glucosidase 12 isoform X1	Cyanoamino acid metabolism (ko00460)	[G]	Carbohydrate transport and metabolism	Glycosyl hydrolase family 1	Cyanogenic beta-glucosidase (Fragment) OS=Trifolium repens OX=3899 GN=LI PE=1 SV=1	G	Carbohydrate transport and metabolism	cyanogenic beta-glucosidase isoform X2 [Prunus persica]
PaF106G0800029279.01	197	175	186	0	0	0	3.50648	3.77726	3.55261	0	0	0	1.27173e-46	-4.71375	down	--	--	Cellular Component: endoplasmic reticulum (GO:0005783);; Biological Process: lipid transport (GO:0006869);; Molecular Function: lipid binding (GO:0008289);; Cellular Component: integral component of membrane (GO:0016021);;	--	--	[R]	General function prediction only	--	--	S	Function unknown	unnamed protein product [Prunus armeniaca]
PaF106G0100004300.01	307	328	365	27	21	32	4.99118	6.16466	5.91609	0.435317	0.323883	0.435041	2.48308e-44	-3.17441	down	--	--	Biological Process: maturation of SSU-rRNA from tricistronic rRNA transcript (SSU-rRNA, 5.8S rRNA, LSU-rRNA) (GO:0000462);; Cellular Component: nucleolus (GO:0005730);; Cellular Component: small-subunit processome (GO:0032040);;	K14768|2.8e-74|pmum:103321247|K14768 U3 small nucleolar RNA-associated protein 7 | (RefSeq) probable U3 small nucleolar RNA-associated protein 7	--	[A]	RNA processing and modification	BING4CT (NUC141) domain	--	A	RNA processing and modification	unnamed protein product [Prunus armeniaca]
PaF106G0400016297.01	3109	2365	2626	700	597	784	42.3762	38.5726	36.9182	10.3496	9.48202	10.6809	7.66202e-85	-1.84028	down	--	--	Molecular Function: double-stranded DNA binding (GO:0003690);; Biological Process: DNA repair (GO:0006281);; Molecular Function: zinc ion binding (GO:0008270);; Molecular Function: polynucleotide 3'-phosphatase activity (GO:0046403);; Molecular Function: ATP-dependent polydeoxyribonucleotide 5'-hydroxyl-kinase activity (GO:0046404);; Biological Process: nucleotide phosphorylation (GO:0046939);; M…	K08073|2.1e-222|pmum:103326113|K08073 bifunctional polynucleotide phosphatase/kinase [EC:3.1.3.32 2.7.1.78] | (RefSeq) polynucleotide 3'-phosphatase ZDP	--	[L]	Replication, recombination and repair	Polynucleotide kinase 3 phosphatase	Polynucleotide 3'-phosphatase ZDP OS=Arabidopsis thaliana OX=3702 GN=ZDP PE=1 SV=1	--	--	PREDICTED: polynucleotide 3'-phosphatase ZDP [Prunus mume]
PaF106G0300014150.01	10	13	21	44	53	50	0.37141	0.557603	0.828674	1.81906	2.3639	1.88818	0.000514433	1.26589	up	--	--	Cellular Component: integral component of membrane (GO:0016021);;	--	--	--	--	--	--	--	--	unnamed protein product [Prunus armeniaca]
PaF106G0100005870.01	0	0	0	218	179	288	0	0	0	2.60345	2.29753	3.16609	4.0854e-56	5.07886	up	--	--	Molecular Function: protein binding (GO:0005515);;	K23002|5.6e-11|bvg:104898024|K23002 RNA polymerase II-associated protein 3 | (RefSeq) F-box protein At1g49990	--	[O]	Posttranslational modification, protein turnover, chaperones	F-box-like	Calreticulin-3 OS=Arabidopsis thaliana OX=3702 GN=CRT3 PE=1 SV=2	--	--	uncharacterized protein LOC110753452 [Prunus avium]
PaF106G0100006531.01	48	37	51	127	196	154	0.946373	0.88303	1.04499	2.73203	4.58684	3.08543	9.32871e-10	1.63874	up	[G]	Carbohydrate transport and metabolism	Molecular Function: pectate lyase activity (GO:0030570);; Biological Process: pectin catabolic process (GO:0045490);; Molecular Function: metal ion binding (GO:0046872);;	K01728|3.5e-227|pavi:110764871|K01728 pectate lyase [EC:4.2.2.2] | (RefSeq) probable pectate lyase 4	Pentose and glucuronate interconversions (ko00040)	--	--	Pectate lyase	Putative pectate lyase 2 OS=Arabidopsis thaliana OX=3702 GN=At1g11920 PE=3 SV=2	G	Carbohydrate transport and metabolism	unnamed protein product [Prunus armeniaca]
PaF106G0200009839.01	104	124	90	331	315	337	1.44191	2.05106	1.29203	5.01274	5.11059	4.69189	4.60527e-15	1.57648	up	--	--	Cellular Component: integral component of membrane (GO:0016021);; Molecular Function: transferase activity, transferring acyl groups (GO:0016746);;	K13508|2.6e-278|pmum:103332675|K13508 glycerol-3-phosphate acyltransferase [EC:2.3.1.15 2.3.1.198] | (RefSeq) glycerol-3-phosphate acyltransferase 5-like	Glycerolipid metabolism (ko00561);; Glycerophospholipid metabolism (ko00564)	--	--	haloacid dehalogenase-like hydrolase	Glycerol-3-phosphate acyltransferase 5 OS=Arabidopsis thaliana OX=3702 GN=GPAT5 PE=1 SV=1	I	Lipid transport and metabolism	unnamed protein product [Prunus armeniaca]
PaF106G0500019108.01	76	83	67	0	2	0	0.378023	0.498157	0.343981	0	0.01147	0	9.67554e-19	-3.19563	down	[S]	Function unknown	Molecular Function: ATP binding (GO:0005524);;	K10875|3.5e-229|pmum:103329023|K10875 DNA repair and recombination protein RAD54 and RAD54-like protein [EC:3.6.4.-] | (RefSeq) SNF2 domain-containing protein CLASSY 4-like	Homologous recombination (ko03440)	[L]	Replication, recombination and repair	SNF2 family N-terminal domain	SNF2 domain-containing protein CLASSY 3 OS=Arabidopsis thaliana OX=3702 GN=CLSY3 PE=1 SV=1	L	Replication, recombination and repair	unnamed protein product [Prunus armeniaca]
PaF106G0800032614.01	819	749	783	1636	1461	2014	7.23802	7.92313	7.12803	15.7683	15.0917	17.8453	5.66097e-32	1.17651	up	[T]	Signal transduction mechanisms	Molecular Function: ATP binding (GO:0005524);; Cellular Component: integral component of membrane (GO:0016021);; Molecular Function: ATPase activity (GO:0016887);;	K05681|9.2e-81|nau:109228191|K05681 ATP-binding cassette, subfamily G (WHITE), member 2 | (RefSeq) ABC transporter G family member 9-like	ABC transporters (ko02010)	[Q]	Secondary metabolites biosynthesis, transport and catabolism	ABC transporter	ABC transporter G family member 22 OS=Arabidopsis thaliana OX=3702 GN=ABCG22 PE=1 SV=1	Q	Secondary metabolites biosynthesis, transport and catabolism	unnamed protein product [Prunus armeniaca]
PaF106G0800030354.01	1051	910	1123	447	401	498	17.1189	17.7368	18.8815	7.92931	7.62902	8.12153	9.75174e-21	-1.08276	down	--	--	Molecular Function: molecular_function (GO:0003674);; Molecular Function: nucleic acid binding (GO:0003676);; Molecular Function: RNA binding (GO:0003723);; Molecular Function: catalytic activity (GO:0003824);; Molecular Function: nuclease activity (GO:0004518);; Molecular Function: endonuclease activity (GO:0004519);; Molecular Function: binding (GO:0005488);; Cellular Component: cellular_compon…	--	--	[R]	General function prediction only	PPR repeat family	Pentatricopeptide repeat-containing protein At4g38150 OS=Arabidopsis thaliana OX=3702 GN=At4g38150 PE=2 SV=1	S	Function unknown	PREDICTED: pentatricopeptide repeat-containing protein At4g38150 [Prunus mume]
PaF106G0100000835.01	38	28	24	61	120	125	0.961733	0.83389	0.622047	1.65523	3.53354	3.165	4.84403e-06	1.45574	up	[P]	Inorganic ion transport and metabolism	Molecular Function: calcium-transporting ATPase activity (GO:0005388);; Molecular Function: ATP binding (GO:0005524);; Cellular Component: integral component of membrane (GO:0016021);;	K01537|3.7e-98|pavi:110758353|K01537 P-type Ca2+ transporter type 2C [EC:7.2.2.10] | (RefSeq) calcium-transporting ATPase 8, plasma membrane-type-like isoform X1	--	[P]	Inorganic ion transport and metabolism	Cation transporting ATPase, C-terminus	Calcium-transporting ATPase 5, plasma membrane-type OS=Oryza sativa subsp. japonica OX=39947 GN=ACA5 PE=1 SV=2	P	Inorganic ion transport and metabolism	calcium-transporting ATPase 8, plasma membrane-type-like isoform X1 [Prunus avium]
PaF106G0800031809.01	411	312	387	52	45	93	7.85826	7.12844	7.62452	1.07616	0.982705	1.76329	2.61417e-26	-2.25143	down	[Q]	Secondary metabolites biosynthesis, transport and catabolism	Molecular Function: oxidoreductase activity (GO:0016491);; Molecular Function: metal ion binding (GO:0046872);;	K24028|1.3e-90|lja:Lj0g3v0213339.1|K24028 salicylic acid 3-hydroxylase [EC:1.14.11.-] | (RefSeq) Lj0g3v0213339.1; -	--	[QR]	Secondary metabolites biosynthesis, transport and catabolism;; General function prediction only	non-haem dioxygenase in morphine synthesis N-terminal	2-oxoglutarate-dependent dioxygenase 19 OS=Oryza sativa subsp. japonica OX=39947 GN=2ODD19 PE=1 SV=1	Q	Secondary metabolites biosynthesis, transport and catabolism	PREDICTED: protein DMR6-LIKE OXYGENASE 2-like [Prunus mume]
PaF106G0100006288.01	154	160	156	51	35	63	5.78181	7.18024	6.03644	2.08432	1.52489	2.36054	5.82955e-08	-1.38729	down	[J]	Translation, ribosomal structure and biogenesis	Biological Process: ribosomal small subunit assembly (GO:0000028);; Molecular Function: structural constituent of ribosome (GO:0003735);; Biological Process: translation (GO:0006412);; Cellular Component: cytosolic small ribosomal subunit (GO:0022627);; Biological Process: maturation of SSU-rRNA (GO:0030490);;	K02979|2.8e-28|pper:109946546|K02979 small subunit ribosomal protein S28e | (RefSeq) 40S ribosomal protein S28-like	Ribosome (ko03010)	[J]	Translation, ribosomal structure and biogenesis	Ribosomal protein S28e	40S ribosomal protein S28 OS=Zea mays OX=4577 GN=RPS28 PE=3 SV=1	J	Translation, ribosomal structure and biogenesis	40S ribosomal protein S28-like [Prunus persica]
PaF106G0800032611.01	81	77	58	115	127	248	0.783425	0.886571	0.575349	1.20396	1.43227	2.40037	0.000199525	1.04945	up	--	--	Biological Process: telomere maintenance (GO:0000723);; Molecular Function: DNA helicase activity (GO:0003678);; Molecular Function: ATP binding (GO:0005524);; Biological Process: DNA repair (GO:0006281);; Biological Process: DNA recombination (GO:0006310);;	K07466|2.7e-189|pper:18792188|K07466 replication factor A1 | (RefSeq) replication protein A 70 kDa DNA-binding subunit B	DNA replication (ko03030);; Nucleotide excision repair (ko03420);; Mismatch repair (ko03430);; Homologous recombination (ko03440)	--	--	Replication protein A OB domain	--	D	Cell cycle control, cell division, chromosome partitioning	unnamed protein product [Prunus armeniaca]
PaF106G0600024201.01	1605	1332	1078	235	322	407	18.7942	18.683	13.1062	2.98153	4.3904	4.77905	3.34464e-29	-1.87392	down	--	--	Molecular Function: hydrolase activity, hydrolyzing O-glycosyl compounds (GO:0004553);; Biological Process: carbohydrate metabolic process (GO:0005975);; Cellular Component: anchored component of plasma membrane (GO:0046658);;	K19891|5.4e-25|smo:SELMODRAFT_87871|K19891 glucan endo-1,3-beta-glucosidase 1/2/3 [EC:3.2.1.39] | (RefSeq) hypothetical protein	Starch and sucrose metabolism (ko00500)	--	--	X8 domain	Glucan endo-1,3-beta-glucosidase 12 OS=Arabidopsis thaliana OX=3702 GN=At4g29360 PE=2 SV=1	G	Carbohydrate transport and metabolism	unnamed protein product [Prunus armeniaca]
PaF106G0200006792.01	75	75	105	153	199	241	2.41669	2.91357	3.51263	5.40567	7.57443	7.86355	1.47521e-06	1.15653	up	--	--	Biological Process: lipid transport (GO:0006869);; Molecular Function: lipid binding (GO:0008289);; Cellular Component: membrane (GO:0016020);;	--	--	--	--	Protease inhibitor/seed storage/LTP family	Non-specific lipid-transfer protein 8 OS=Arabidopsis thaliana OX=3702 GN=LTP8 PE=3 SV=1	G	Carbohydrate transport and metabolism	PREDICTED: non-specific lipid-transfer protein 8-like [Prunus mume]
PaF106G0300011239.01	219	234	212	95	67	91	3.46379	4.29889	3.4592	1.6378	1.28585	1.39603	8.47764e-08	-1.19523	down	--	--	Molecular Function: hydrolase activity, acting on ester bonds (GO:0016788);;	K01206|2.2e-32|thj:104825554|K01206 alpha-L-fucosidase [EC:3.2.1.51] | (RefSeq) alpha-L-fucosidase 3	Other glycan degradation (ko00511)	--	--	GDSL-like Lipase/Acylhydrolase	GDSL esterase/lipase At3g27950 OS=Arabidopsis thaliana OX=3702 GN=At3g27950 PE=2 SV=1	S	Function unknown	hypothetical protein PRUPE_3G285100 [Prunus persica]
PaF106G0600024506.01	378	259	413	827	691	1006	5.02793	4.13673	5.66677	12.0004	10.7795	13.4682	1.32583e-17	1.29515	up	--	--	Molecular Function: protein binding (GO:0005515);;	--	--	--	--	F-box domain	F-box/FBD/LRR-repeat protein At5g22700 OS=Arabidopsis thaliana OX=3702 GN=At5g22700 PE=2 SV=2	S	Function unknown	unnamed protein product [Prunus armeniaca]
PaF106G0300012396.01	196	171	148	901	660	806	2.65367	2.7652	2.05986	13.2655	10.4238	10.9158	9.14072e-42	2.17508	up	[QV]	Secondary metabolites biosynthesis, transport and catabolism;; Defense mechanisms	Molecular Function: iron ion binding (GO:0005506);; Cellular Component: membrane (GO:0016020);; Molecular Function: oxidoreductase activity, acting on paired donors, with incorporation or reduction of molecular oxygen, NAD(P)H as one donor, and incorporation of one atom of oxygen (GO:0016709);; Molecular Function: heme binding (GO:0020037);;	K00495|1.8e-239|pmum:103337951|K00495 phenylacetaldehyde oxime monooxygenase [EC:1.14.14.44] | (RefSeq) cytochrome P450 71A1-like	Cyanoamino acid metabolism (ko00460)	[Q]	Secondary metabolites biosynthesis, transport and catabolism	Cytochrome P450	Phenylacetaldehyde oxime monooxygenase CYP71AN24 OS=Prunus mume OX=102107 GN=CYP71AN24 PE=1 SV=1	Q	Secondary metabolites biosynthesis, transport and catabolism	PREDICTED: cytochrome P450 71A1-like [Prunus mume]
PaF106G0400015353.01	33	14	14	60	52	51	0.641892	0.318905	0.282703	1.29164	1.19941	1.00896	0.00248468	1.09634	up	[P]	Inorganic ion transport and metabolism	Cellular Component: integral component of membrane (GO:0016021);; Molecular Function: metal ion transmembrane transporter activity (GO:0046873);;	K14709|1.3e-169|pmum:103342750|K14709 solute carrier family 39 (zinc transporter), member 1/2/3 | (RefSeq) zinc transporter 11-like	--	[P]	Inorganic ion transport and metabolism	ZIP Zinc transporter	Zinc transporter 11 OS=Arabidopsis thaliana OX=3702 GN=ZIP11 PE=2 SV=1	P	Inorganic ion transport and metabolism	PREDICTED: zinc transporter 11-like [Prunus mume]
PaF106G0300012172.01	220	248	212	62	59	61	1.69291	2.27738	1.68022	0.51474	0.530173	0.463098	5.93905e-13	-1.63752	down	--	--	Cellular Component: integral component of membrane (GO:0016021);;	K13466|3.5e-23|zju:107423984|K13466 EIX receptor 1/2 | (RefSeq) receptor-like protein EIX2	Plant-pathogen interaction (ko04626)	[R]	General function prediction only	Leucine rich repeat	Receptor-like protein 6 OS=Arabidopsis thaliana OX=3702 GN=RLP6 PE=3 SV=1	B	Chromatin structure and dynamics	receptor like protein 30-like [Prunus avium]
PaF106G0600025168.01	195	149	156	63	78	74	2.43356	2.2121	2.00465	0.854096	1.12314	0.924105	2.27154e-05	-1.00584	down	[E]	Amino acid transport and metabolism	Molecular Function: transaminase activity (GO:0008483);; Cellular Component: integral component of membrane (GO:0016021);;	K22207|1.2e-272|pavi:110770561|K22207 L-cysteine desulfhydrase [EC:4.4.1.28] | (RefSeq) probable L-cysteine desulfhydrase, chloroplastic	Cysteine and methionine metabolism (ko00270)	[E]	Amino acid transport and metabolism	Aminotransferase class-V	Probable L-cysteine desulfhydrase, chloroplastic OS=Arabidopsis thaliana OX=3702 GN=CpNIFS3 PE=1 SV=1	E	Amino acid transport and metabolism	unnamed protein product [Prunus armeniaca]
PaF106G0300011916.01	977	794	951	334	328	288	16.8689	16.4009	16.9368	6.27046	6.59418	4.96461	1.51405e-21	-1.36315	down	--	--	Molecular Function: nucleic acid binding (GO:0003676);; Biological Process: DNA integration (GO:0015074);;	K15803|1.7e-23|pmum:103326375|K15803 (-)-germacrene D synthase [EC:4.2.3.75] | (RefSeq) (-)-alpha-pinene synthase-like	Sesquiterpenoid and triterpenoid biosynthesis (ko00909)	--	--	gag-polypeptide of LTR copia-type	--	L	Replication, recombination and repair	uncharacterized protein LOC110773211 [Prunus avium]
PaF106G0500021088.01	883	634	729	218	270	375	11.3013	9.69966	9.62135	3.03339	4.03279	4.80633	1.33889e-14	-1.23593	down	[QV]	Secondary metabolites biosynthesis, transport and catabolism;; Defense mechanisms	Molecular Function: monooxygenase activity (GO:0004497);; Molecular Function: iron ion binding (GO:0005506);; Molecular Function: oxidoreductase activity, acting on paired donors, with incorporation or reduction of molecular oxygen (GO:0016705);; Molecular Function: heme binding (GO:0020037);;	K20562|5.4e-167|thj:104815260|K20562 biphenyl-4-hydroxylase | (RefSeq) cytochrome P450 CYP736A12-like	--	[Q]	Secondary metabolites biosynthesis, transport and catabolism	Cytochrome P450	Cytochrome P450 CYP736A12 OS=Panax ginseng OX=4054 PE=2 SV=1	Q	Secondary metabolites biosynthesis, transport and catabolism	PREDICTED: cytochrome P450 CYP736A12-like [Prunus mume]
PaF106G0200008738.01	554	547	585	206	233	296	9.40039	11.1076	10.2425	3.79579	4.61734	5.01889	2.48534e-12	-1.07354	down	[T]	Signal transduction mechanisms	Biological Process: microtubule cytoskeleton organization (GO:0000226);; Biological Process: mitotic cell cycle (GO:0000278);; Cellular Component: chromosome, centromeric region (GO:0000775);; Molecular Function: ATP binding (GO:0005524);; Cellular Component: nucleus (GO:0005634);; Cellular Component: spindle (GO:0005819);; Biological Process: chromosome segregation (GO:0007059);; Biological Proc…	K08850|1.2e-157|pavi:110766848|K08850 aurora kinase, other [EC:2.7.11.1] | (RefSeq) serine/threonine-protein kinase Aurora-3	--	[D]	Cell cycle control, cell division, chromosome partitioning	Protein kinase domain	Serine/threonine-protein kinase Aurora-3 OS=Arabidopsis thaliana OX=3702 GN=AUR3 PE=2 SV=1	T	Signal transduction mechanisms	unnamed protein product [Prunus armeniaca]
PaF106G0200007550.01	19	19	47	100	82	119	0.544975	0.665656	1.43389	3.25688	2.85744	3.57758	8.10872e-06	1.46218	up	--	--	Biological Process: signal transduction (GO:0007165);; Molecular Function: ADP binding (GO:0043531);;	--	--	--	--	--	--	T	Signal transduction mechanisms	disease resistance protein RPS4-like [Prunus avium]
PaF106G0200008359.01	424	350	433	747	781	834	7.5001	7.55925	7.92251	14.5024	16.2385	14.882	7.99335e-17	1.03147	up	--	--	Molecular Function: peptidyl-prolyl cis-trans isomerase activity (GO:0003755);; Cellular Component: integral component of membrane (GO:0016021);;	K10848|1.4e-99|cic:CICLE_v10024418mg|K10848 DNA excision repair protein ERCC-4 [EC:3.1.-.-] | (RefSeq) hypothetical protein	Nucleotide excision repair (ko03420)	--	--	Cyclophilin type peptidyl-prolyl cis-trans isomerase/CLD	--	S	Function unknown	PREDICTED: uncharacterized protein LOC103331535 [Prunus mume]
PaF106G0100001047.01	20	2	8	60	54	79	0.779402	0.096407	0.317318	2.63157	2.52219	3.19919	2.12262e-06	1.76347	up	--	--	Molecular Function: iron ion binding (GO:0005506);; Biological Process: lipid biosynthetic process (GO:0008610);; Cellular Component: integral component of membrane (GO:0016021);; Molecular Function: oxidoreductase activity (GO:0016491);;	K15746|3.3e-61|pper:18787302|K15746 beta-carotene 3-hydroxylase [EC:1.14.15.24] | (RefSeq) beta-carotene hydroxylase 2, chloroplastic	Carotenoid biosynthesis (ko00906)	--	--	--	Beta-carotene hydroxylase 2, chloroplastic OS=Capsicum annuum OX=4072 GN=CA2 PE=1 SV=2	S	Function unknown	unnamed protein product [Prunus armeniaca]
PaF106G0200007369.01	562	420	472	183	183	202	2.62219	2.22248	1.87537	0.768153	0.822196	0.779936	1.46558e-15	-1.20879	down	--	--	Molecular Function: ADP binding (GO:0043531);;	K12818|4.5e-59|mtr:MTR_0267s0070|K12818 ATP-dependent RNA helicase DHX8/PRP22 [EC:3.6.4.13] | (RefSeq) NB-ARC domain disease resistance protein, putative	Spliceosome (ko03040)	[T]	Signal transduction mechanisms	Leucine Rich repeats (2 copies)	Putative disease resistance protein At3g14460 OS=Arabidopsis thaliana OX=3702 GN=At3g14460 PE=3 SV=1	T	Signal transduction mechanisms	hypothetical protein PRUPE_2G046700 [Prunus persica]
PaF106G0300011070.01	25	39	33	384	342	371	0.280528	0.538224	0.38657	4.85919	4.6425	4.32007	2.15014e-48	3.2137	up	--	--	Cellular Component: integral component of membrane (GO:0016021);;	K19476|1.4e-20|cic:CICLE_v10026997mg|K19476 vacuolar protein sorting-associated protein IST1 | (RefSeq) hypothetical protein	Endocytosis (ko04144)	[E]	Amino acid transport and metabolism	Transmembrane amino acid transporter protein	Lysine histidine transporter 1 OS=Arabidopsis thaliana OX=3702 GN=LHT1 PE=1 SV=1	E	Amino acid transport and metabolism	lysine histidine transporter 1 isoform X1 [Prunus yedoensis var. nudiflora]
PaF106G0200008218.01	14	10	13	59	38	56	0.587398	0.532431	0.569798	2.85768	1.96052	2.51757	2.45254e-05	1.49925	up	--	--	Biological Process: ubiquitin-dependent protein catabolic process (GO:0006511);;	K03094|2.6e-56|pavi:110752715|K03094 S-phase kinase-associated protein 1 | (RefSeq) SKP1-like protein 11	Ubiquitin mediated proteolysis (ko04120);; Protein processing in endoplasmic reticulum (ko04141)	[O]	Posttranslational modification, protein turnover, chaperones	Skp1 family, tetramerisation domain	SKP1-like protein 1A OS=Arabidopsis thaliana OX=3702 GN=SKP1A PE=1 SV=1	O	Posttranslational modification, protein turnover, chaperones	SKP1-like protein 1B [Prunus yedoensis var. nudiflora]
PaF106G0800030586.01	37	17	15	76	63	119	1.03727	0.567533	0.42665	2.31736	2.05517	3.32842	8.00134e-06	1.49559	up	--	--	Molecular Function: RNA binding (GO:0003723);;	K13091|1.7e-56|pmum:103334919|K13091 RNA-binding protein 23/39 | (RefSeq) RNA-binding protein 39	--	[K]	Transcription	linker between RRM2 and RRM3 domains in RBM39 protein	--	A	RNA processing and modification	unnamed protein product [Prunus armeniaca]
PaF106G0200008826.01	0	1	0	50	52	46	0	0.00493	0	1.10285	1.22089	0.918131	4.25439e-14	2.82086	up	--	--	Cellular Component: cellular_component (GO:0005575);; Cellular Component: intracellular (GO:0005622);; Cellular Component: cell (GO:0005623);; Cellular Component: nucleus (GO:0005634);; Cellular Component: cytoplasm (GO:0005737);; Cellular Component: organelle (GO:0043226);; Cellular Component: membrane-bounded organelle (GO:0043227);; Cellular Component: intracellular organelle (GO:0043229);; Ce…	--	--	[S]	Function unknown	Armadillo/beta-catenin-like repeat	--	S	Function unknown	hypothetical protein ES332_A11G096800v1 [Gossypium tomentosum]
PaF106G0200007295.01	420	450	345	110	70	133	2.31896	2.97035	1.96081	0.657583	0.448832	0.731347	4.44462e-16	-1.72782	down	[R]	General function prediction only	Molecular Function: ADP binding (GO:0043531);;	K12818|4.8e-193|mtr:MTR_0267s0070|K12818 ATP-dependent RNA helicase DHX8/PRP22 [EC:3.6.4.13] | (RefSeq) NB-ARC domain disease resistance protein, putative	Spliceosome (ko03040)	[T]	Signal transduction mechanisms	NB-ARC domain	Putative disease resistance RPP13-like protein 1 OS=Arabidopsis thaliana OX=3702 GN=RPPL1 PE=3 SV=1	T	Signal transduction mechanisms	putative disease resistance RPP13-like protein 1 [Prunus persica]
PaF106G0800029936.01	286	161	340	20	7	75	8.32104	5.60354	10.223	0.612324	0.234302	2.18996	0.00389366	-1.1513	down	--	--	Molecular Function: RNA binding (GO:0003723);; Molecular Function: ribonuclease T2 activity (GO:0033897);;	K01166|9.6e-72|pmum:103327469|K01166 ribonuclease T2 [EC:4.6.1.19] | (RefSeq) ribonuclease S-7-like	--	--	--	Ribonuclease T2 family	--	S	Function unknown	PREDICTED: ribonuclease S-7-like [Prunus mume]
PaF106G0100001087.01	77	35	76	241	196	229	0.883332	0.475957	0.898307	3.02561	2.63444	2.64359	7.01398e-12	1.69848	up	[IR]	Lipid transport and metabolism;; General function prediction only	Molecular Function: oxidoreductase activity, acting on CH-OH group of donors (GO:0016614);; Molecular Function: lyase activity (GO:0016829);; Molecular Function: flavin adenine dinucleotide binding (GO:0050660);;	K08248|0.0e+00|pmum:103323461|K08248 (R)-mandelonitrile lyase [EC:4.1.2.10] | (RefSeq) (R)-mandelonitrile lyase 2-like	Cyanoamino acid metabolism (ko00460)	[R]	General function prediction only	GMC oxidoreductase	(R)-mandelonitrile lyase 2 OS=Prunus serotina OX=23207 GN=MDL2 PE=2 SV=1	E	Amino acid transport and metabolism	PREDICTED: (R)-mandelonitrile lyase 2-like [Prunus mume]
PaF106G0800032319.01	91	89	78	534	506	605	0.49561	0.583699	0.442294	3.19119	3.2436	3.32777	1.44889e-58	2.61374	up	[R]	General function prediction only	Biological Process: signal transduction (GO:0007165);; Molecular Function: ADP binding (GO:0043531);;	K00695|5.7e-130|mtr:MTR_6g478030|K00695 sucrose synthase [EC:2.4.1.13] | (RefSeq) sucrose synthase	Starch and sucrose metabolism (ko00500)	--	--	TIR domain	TMV resistance protein N OS=Nicotiana glutinosa OX=35889 GN=N PE=1 SV=1	S	Function unknown	PREDICTED: TMV resistance protein N-like [Prunus mume]
PaF106G0800031796.01	1566	1137	1575	113	97	91	45.9795	39.9524	47.7058	3.60977	3.30875	2.66972	9.95111e-124	-3.55914	down	--	--	Molecular Function: protein kinase activity (GO:0004672);; Molecular Function: ATP binding (GO:0005524);; Cellular Component: integral component of membrane (GO:0016021);;	--	--	--	--	--	--	--	--	putative LRR receptor-like serine/threonine-protein kinase [Prunus yedoensis var. nudiflora]
PaF106G0300011662.01	153	190	194	349	357	482	3.33028	4.91522	4.32763	8.35658	9.21466	10.7024	1.14178e-09	1.1363	up	--	--	Molecular Function: transcription regulatory region sequence-specific DNA binding (GO:0000976);; Molecular Function: RNA polymerase II regulatory region sequence-specific DNA binding (GO:0000977);; Molecular Function: RNA polymerase II transcription factor activity, sequence-specific DNA binding (GO:0000981);; Cellular Component: nucleus (GO:0005634);; Molecular Function: transcription factor bin…	K09264|2.7e-100|pavi:110759061|K09264 MADS-box transcription factor, plant | (RefSeq) truncated transcription factor CAULIFLOWER A-like	--	[K]	Transcription	K-box region	Agamous-like MADS-box protein FUL-L OS=Vitis vinifera OX=29760 GN=FULL PE=2 SV=1	K	Transcription	hypothetical protein PRUPE_3G249300 [Prunus persica]
PaF106G0200008745.01	2567	1597	1884	178	222	253	31.3637	23.3459	23.7343	2.35479	3.16142	3.08505	1.23331e-98	-2.99056	down	[QV]	Secondary metabolites biosynthesis, transport and catabolism;; Defense mechanisms	Molecular Function: iron ion binding (GO:0005506);; Cellular Component: integral component of membrane (GO:0016021);; Molecular Function: oxidoreductase activity, acting on paired donors, with incorporation or reduction of molecular oxygen (GO:0016705);; Molecular Function: heme binding (GO:0020037);;	K20495|2.5e-116|ppp:112291140|K20495 long-chain fatty acid omega-monooxygenase [EC:1.14.14.80] | (RefSeq) cytochrome P450 704B1-like	Fatty acid degradation (ko00071);; Cutin, suberine and wax biosynthesis (ko00073)	[QI]	Secondary metabolites biosynthesis, transport and catabolism;; Lipid transport and metabolism	Cytochrome P450	Cytochrome P450 704C1 OS=Pinus taeda OX=3352 GN=CYP704C1 PE=2 SV=1	--	--	PREDICTED: cytochrome P450 704C1-like [Prunus mume]
PaF106G0300012972.01	154	127	176	43	41	55	2.39353	2.34925	2.81571	0.723681	0.738029	0.850476	1.18733e-08	-1.43235	down	--	--	Cellular Component: integral component of membrane (GO:0016021);;	--	--	--	--	Plant protein of unknown function	UPF0481 protein At3g47200 OS=Arabidopsis thaliana OX=3702 GN=At3g47200 PE=2 SV=1	--	--	PREDICTED: UPF0481 protein At3g47200-like [Prunus mume]
PaF106G0800032221.01	41	69	57	290	265	453	0.44479	0.895586	0.639525	3.45156	3.38108	4.96815	1.1825e-22	2.3341	up	--	--	Cellular Component: plasma membrane (GO:0005886);; Cellular Component: integral component of membrane (GO:0016021);;	K08286|6.9e-07|aly:9305569|K08286 protein-serine/threonine kinase [EC:2.7.11.-] | (RefSeq) receptor-like protein kinase 5	--	--	--	Leucine rich repeat	Probable LRR receptor-like serine/threonine-protein kinase At2g24230 OS=Arabidopsis thaliana OX=3702 GN=At2g24230 PE=1 SV=1	T	Signal transduction mechanisms	PREDICTED: leucine-rich repeat receptor protein kinase EMS1-like [Prunus mume]
PaF106G0400017490.01	28	44	26	97	136	133	0.172143	0.329505	0.168637	0.692348	1.03263	0.849515	8.98218e-08	1.60144	up	--		Molecular Function: protein serine/threonine kinase activity (GO:0004674);; Molecular Function: ATP binding (GO:0005524);; Cellular Component: plasma membrane (GO:0005886);; Cellular Component: integral component of membrane (GO:0016021);; Biological Process: protein autophosphorylation (GO:0046777);;	K13416|8.2e-67|bna:106376693|K13416 brassinosteroid insensitive 1-associated receptor kinase 1 [EC:2.7.10.1 2.7.11.1] | (RefSeq) BRASSINOSTEROID INSENSITIVE 1-associated receptor kinase 1-like isoform X1	MAPK signaling pathway - plant (ko04016);; Plant hormone signal transduction (ko04075);; Plant-pathogen interaction (ko04626)	--	--	Protein kinase domain	Probable LRR receptor-like serine/threonine-protein kinase At1g07650 OS=Arabidopsis thaliana OX=3702 GN=At1g07650 PE=1 SV=1	T	Signal transduction mechanisms	PREDICTED: probable leucine-rich repeat receptor-like serine/threonine-protein kinase At3g14840 [Prunus mume]
PaF106G0200007519.01	273	184	252	6	21	35	9.00306	7.74513	9.19776	0.159446	0.595662	0.876713	1.08548e-20	-2.75101	down	--	--	Cellular Component: integral component of membrane (GO:0016021);;	--	--	--	--	--	--	--	--	unnamed protein product [Prunus armeniaca]
PaF106G0800031024.01	61	55	67	163	132	213	0.874165	0.945473	0.988579	2.54828	2.20572	3.05951	7.7817e-09	1.37866	up	[G]	Carbohydrate transport and metabolism	Molecular Function: UDP-glycosyltransferase activity (GO:0008194);;	K14595|1.0e-271|pper:18766834|K14595 abscisate beta-glucosyltransferase [EC:2.4.1.263] | (RefSeq) abscisate beta-glucosyltransferase	Carotenoid biosynthesis (ko00906)	[GC]	Carbohydrate transport and metabolism;; Energy production and conversion	UDP-glucoronosyl and UDP-glucosyl transferase	Abscisate beta-glucosyltransferase OS=Phaseolus angularis OX=3914 GN=AOG PE=1 SV=1	--	--	unnamed protein product [Prunus armeniaca]
PaF106G0800032374.01	144	128	157	278	322	320	0.728291	0.774968	0.820642	1.53176	1.90287	1.62137	1.23983e-09	1.11911	up	--	--	Biological Process: signal transduction (GO:0007165);; Molecular Function: ADP binding (GO:0043531);;	K00695|9.5e-128|mtr:MTR_6g478030|K00695 sucrose synthase [EC:2.4.1.13] | (RefSeq) sucrose synthase	Starch and sucrose metabolism (ko00500)	--	--	TIR domain	TMV resistance protein N OS=Nicotiana glutinosa OX=35889 GN=N PE=1 SV=1	S	Function unknown	PREDICTED: TMV resistance protein N-like [Prunus mume]
PaF106G0800032587.01	32	33	19	87	69	108	0.476691	0.582111	0.284815	1.40339	1.19132	1.61113	1.2375e-05	1.37	up	--	--	Molecular Function: anaphase-promoting complex binding (GO:0010997);; Biological Process: cell division (GO:0051301);; Molecular Function: ubiquitin-protein transferase activator activity (GO:0097027);; Biological Process: positive regulation of ubiquitin protein ligase activity (GO:1904668);;	K03363|5.0e-109|mdm:103436456|K03363 cell division cycle 20, cofactor of APC complex | (RefSeq) cell division cycle 20.1, cofactor of APC complex-like	Ubiquitin mediated proteolysis (ko04120)	[DO]	Cell cycle control, cell division, chromosome partitioning;; Posttranslational modification, protein turnover, chaperones	WD domain, G-beta repeat	Cell division cycle 20.1, cofactor of APC complex OS=Arabidopsis thaliana OX=3702 GN=CDC20-1 PE=1 SV=1	--	--	unnamed protein product [Prunus armeniaca]
PaF106G0100000121.01	13	8	8	68	79	51	0.098219	0.073692	0.065608	0.598942	0.747314	0.410061	1.17384e-08	1.99576	up	--	--	Molecular Function: translation initiation factor activity (GO:0003743);;	K03125|2.9e-284|pavi:110754021|K03125 transcription initiation factor TFIID subunit 1 [EC:2.3.1.48 2.7.11.1] | (RefSeq) transcription initiation factor TFIID subunit 1-like	Basal transcription factors (ko03022)	[K]	Transcription	--	Transcription initiation factor TFIID subunit 1 OS=Arabidopsis thaliana OX=3702 GN=TAF1 PE=1 SV=1	K	Transcription	unnamed protein product [Prunus armeniaca]
PaF106G0100006489.01	388	306	373	1093	1011	1349	2.87558	1.79957	2.94073	10.049	9.78234	11.2001	4.97493e-54	1.73657	up	[R]	General function prediction only	Biological Process: signal transduction (GO:0007165);; Molecular Function: ADP binding (GO:0043531);;	K00695|1.1e-135|mtr:MTR_6g478030|K00695 sucrose synthase [EC:2.4.1.13] | (RefSeq) sucrose synthase	Starch and sucrose metabolism (ko00500)	--	--	TIR domain	TMV resistance protein N OS=Nicotiana glutinosa OX=35889 GN=N PE=1 SV=1	T	Signal transduction mechanisms	TMV resistance protein N isoform X1 [Prunus persica]
PaF106G0200008405.01	103	91	107	43	18	42	1.53785	1.62362	1.64495	0.687927	0.310074	0.625485	0.000149233	-1.18454	down	--	--	Cellular Component: integral component of membrane (GO:0016021);;	K09422|3.1e-12|rcu:8265812|K09422 transcription factor MYB, plant | (RefSeq) transcription factor DUO1	--	--	--	Plant protein of unknown function	UPF0481 protein At3g47200 OS=Arabidopsis thaliana OX=3702 GN=At3g47200 PE=2 SV=1	S	Function unknown	uncharacterized protein LOC110755448 [Prunus avium]
PaF106G0200010198.01	643	626	655	315	223	317	13.9507	16.2808	14.6762	7.41374	5.63169	6.903	8.4428e-12	-1.04501	down	[P]	Inorganic ion transport and metabolism	Molecular Function: superoxide dismutase activity (GO:0004784);; Cellular Component: chloroplast nucleoid (GO:0042644);; Molecular Function: metal ion binding (GO:0046872);;	K04564|4.4e-175|pmum:103333005|K04564 superoxide dismutase, Fe-Mn family [EC:1.15.1.1] | (RefSeq) superoxide dismutase [Fe], chloroplastic isoform X1	Peroxisome (ko04146)	[P]	Inorganic ion transport and metabolism	Iron/manganese superoxide dismutases, C-terminal domain	Superoxide dismutase [Fe] 2, chloroplastic OS=Arabidopsis thaliana OX=3702 GN=FSD2 PE=1 SV=1	P	Inorganic ion transport and metabolism	PREDICTED: superoxide dismutase [Fe], chloroplastic isoform X1 [Prunus mume]
PaF106G0500020036.01	561	417	534	1363	1112	1246	6.93103	6.16411	6.80509	18.3512	16.055	15.4307	3.08009e-27	1.35613	up	[E]	Amino acid transport and metabolism	Cellular Component: cytoplasm (GO:0005737);; Molecular Function: carbon-sulfur lyase activity (GO:0016846);; Biological Process: transsulfuration (GO:0019346);; Molecular Function: pyridoxal phosphate binding (GO:0030170);;	K01761|4.5e-245|pmum:103337840|K01761 methionine-gamma-lyase [EC:4.4.1.11] | (RefSeq) methionine gamma-lyase	Cysteine and methionine metabolism (ko00270);; Selenocompound metabolism (ko00450)	[E]	Amino acid transport and metabolism	Cys/Met metabolism PLP-dependent enzyme	Methionine gamma-lyase OS=Arabidopsis thaliana OX=3702 GN=MGL PE=1 SV=1	E	Amino acid transport and metabolism	unnamed protein product [Prunus armeniaca]
PaF106G0300011919.01	19	11	28	152	124	106	0.104912	0.073442	0.165866	0.950625	0.836379	0.612711	5.57108e-13	2.22137	up	--	--	Molecular Function: protein serine/threonine kinase activity (GO:0004674);; Molecular Function: ATP binding (GO:0005524);; Cellular Component: plasma membrane (GO:0005886);; Biological Process: protein phosphorylation (GO:0006468);;	K03327|6.3e-12|cic:CICLE_v10018703mg|K03327 multidrug resistance protein, MATE family | (RefSeq) hypothetical protein	--	--	--	S-locus glycoprotein domain	G-type lectin S-receptor-like serine/threonine-protein kinase RKS1 OS=Arabidopsis thaliana OX=3702 GN=RKS1 PE=3 SV=3	T	Signal transduction mechanisms	PREDICTED: LOW QUALITY PROTEIN: G-type lectin S-receptor-like serine/threonine-protein kinase At1g11330 [Prunus mume]
PaF106G0600025165.01	135	134	150	53	45	48	1.69358	2.05718	2.04003	0.723172	0.6945	0.619265	9.78465e-07	-1.25391	down	[E]	Amino acid transport and metabolism	Molecular Function: catalytic activity (GO:0003824);;	K22207|1.0e-268|pmum:103344505|K22207 L-cysteine desulfhydrase [EC:4.4.1.28] | (RefSeq) probable L-cysteine desulfhydrase, chloroplastic isoform X1	Cysteine and methionine metabolism (ko00270)	[E]	Amino acid transport and metabolism	Aminotransferase class-V	Probable L-cysteine desulfhydrase, chloroplastic OS=Arabidopsis thaliana OX=3702 GN=CpNIFS3 PE=1 SV=1	E	Amino acid transport and metabolism	unnamed protein product [Prunus armeniaca]
PaF106G0300014540.01	7803	5117	7473	2156	1890	2415	75.9392	59.7633	75.826	23.5701	21.6993	23.1777	5.36709e-47	-1.52917	down	[I]	Lipid transport and metabolism	Molecular Function: catalytic activity (GO:0003824);;	K01897|1.6e-285|pmum:103327297|K01897 long-chain acyl-CoA synthetase [EC:6.2.1.3] | (RefSeq) long chain acyl-CoA synthetase 1	Fatty acid biosynthesis (ko00061);; Fatty acid degradation (ko00071);; Fatty acid metabolism (ko01212);; Peroxisome (ko04146)	[I]	Lipid transport and metabolism	AMP-binding enzyme	Long chain acyl-CoA synthetase 1 OS=Arabidopsis thaliana OX=3702 GN=LACS1 PE=2 SV=1	I	Lipid transport and metabolism	long-chain acyl-CoA synthetase 1 [Prunus sibirica]
PaF106G0700026974.01	87	61	109	0	0	3	1.81758	1.41359	2.31819	0	0	0.182481	1.50087e-19	-3.2456	down	--	--	Cellular Component: integral component of membrane (GO:0016021);; Biological Process: tail-anchored membrane protein insertion into ER membrane (GO:0071816);;	K22384|3.6e-17|pavi:110754762|K22384 tail-anchored protein insertion receptor | (RefSeq) uncharacterized protein LOC110754762	--	--	--	--	--	S	Function unknown	unnamed protein product [Prunus armeniaca]
PaF106G0800029367.01	3735	2809	3925	6660	7827	8725	225.365	202.862	244.343	437.456	551.402	527.204	2.43442e-31	1.21667	up	--	--	Cellular Component: mitochondrion (GO:0005739);;	--	--	--	--	Late embryogenesis abundant protein	Indole-3-acetic acid-induced protein ARG2 OS=Vigna radiata var. radiata OX=3916 GN=ARG2 PE=2 SV=1	S	Function unknown	unnamed protein product [Prunus armeniaca]
Prunus_sibirica_newGene_155	97	112	99	299	249	321	1.43866	1.97794	1.51756	4.83387	4.31204	4.77414	1.30899e-13	1.45743	up	--	--	Molecular Function: UDP-glycosyltransferase activity (GO:0008194);;	K22706|3.8e-18|pmum:103319663|K22706 (R)-mandelonitrile beta-glucosyltransferase [EC:2.4.1.354] | (RefSeq) 7-deoxyloganetin glucosyltransferase-like	Cyanoamino acid metabolism (ko00460)	[GC]	Carbohydrate transport and metabolism;; Energy production and conversion	--	7-deoxyloganetin glucosyltransferase OS=Catharanthus roseus OX=4058 GN=UGT85A23 PE=1 SV=1	--	--	7-deoxyloganetin glucosyltransferase-like [Prunus yedoensis var. nudiflora]
PaF106G0100002926.01	1878	2155	1940	393	254	351	31.6477	43.4505	33.7233	7.20445	4.97754	5.91575	5.71677e-56	-2.39513	down	[O]	Posttranslational modification, protein turnover, chaperones	Molecular Function: cysteine-type endopeptidase activity (GO:0004197);; Cellular Component: extracellular space (GO:0005615);; Cellular Component: lysosome (GO:0005764);; Biological Process: proteolysis involved in cellular protein catabolic process (GO:0051603);;	K16292|6.5e-207|pmum:103321873|K16292 KDEL-tailed cysteine endopeptidase [EC:3.4.22.-] | (RefSeq) vignain-like	--	[O]	Posttranslational modification, protein turnover, chaperones	Papain family cysteine protease	Vignain OS=Ricinus communis OX=3988 GN=CYSEP PE=1 SV=1	O	Posttranslational modification, protein turnover, chaperones	PREDICTED: vignain-like [Prunus mume]
Prunus_sibirica_newGene_1925	3	0	10	180	151	180	0.013357	0	0.052018	0.984861	0.885613	0.908831	1.64698e-34	3.85099	up	--	--	Molecular Function: nucleic acid binding (GO:0003676);; Molecular Function: RNA-DNA hybrid ribonuclease activity (GO:0004523);; Molecular Function: zinc ion binding (GO:0008270);;	K14677|2.3e-20|ghi:107892630|K14677 aminoacylase [EC:3.5.1.14] | (RefSeq) uncharacterized protein LOC107892630	Arginine biosynthesis (ko00220);; 2-Oxocarboxylic acid metabolism (ko01210);; Biosynthesis of amino acids (ko01230)	[R]	General function prediction only	--	--	L	Replication, recombination and repair	unnamed protein product [Prunus armeniaca]
PaF106G0100003994.01	111	162	112	344	281	266	1.76238	3.07769	1.83517	5.97234	5.22395	4.24492	1.37439e-06	1.15301	up	[T]	Signal transduction mechanisms	Molecular Function: acid phosphatase activity (GO:0003993);; Molecular Function: ferrous iron binding (GO:0008198);; Molecular Function: ferric iron binding (GO:0008199);;	K14379|8.0e-199|pmum:103320985|K14379 tartrate-resistant acid phosphatase type 5 [EC:3.1.3.2] | (RefSeq) purple acid phosphatase 17-like	Riboflavin metabolism (ko00740)	[O]	Posttranslational modification, protein turnover, chaperones	Calcineurin-like phosphoesterase	Purple acid phosphatase 17 OS=Arabidopsis thaliana OX=3702 GN=PAP17 PE=2 SV=1	O	Posttranslational modification, protein turnover, chaperones	unnamed protein product [Prunus armeniaca]
PaF106G0100001278.01	4	26	5	345	364	390	0.062247	0.521349	0.07252	6.7774	7.56962	7.02518	2.86412e-06	1.80866	up	--	--	Biological Process: DNA repair (GO:0006281);; Biological Process: DNA recombination (GO:0006310);; Molecular Function: 5'-flap endonuclease activity (GO:0017108);; Cellular Component: Slx1-Slx4 complex (GO:0033557);;	K15078|4.5e-69|pmum:103323269|K15078 structure-specific endonuclease subunit SLX1 [EC:3.6.1.-] | (RefSeq) structure-specific endonuclease subunit SLX1 homolog	--	--	--	--	--	--	--	PREDICTED: structure-specific endonuclease subunit SLX1 homolog [Prunus mume]
PaF106G0300012720.01	14	10	7	307	132	242	0.30038	0.253691	0.153378	7.52433	3.45188	5.4487	6.42792e-31	3.49184	up	--	--	Molecular Function: protein dimerization activity (GO:0046983);;	K12126|8.5e-08|jre:109000498|K12126 phytochrome-interacting factor 3 | (RefSeq) transcription factor PIF3-like	Plant hormone signal transduction (ko04075);; Circadian rhythm - plant (ko04712)	--	--	Helix-loop-helix DNA-binding domain	Transcription factor RHD6 OS=Arabidopsis thaliana OX=3702 GN=RHD6 PE=1 SV=1	K	Transcription	unnamed protein product [Prunus armeniaca]
PaF106G0100001469.01	0	0	0	253	242	259	0	0	0	11.0465	11.7291	10.4803	2.35384e-62	5.27221	up	--	--	Molecular Function: nucleic acid binding (GO:0003676);; Biological Process: DNA integration (GO:0015074);;	K00284|1.1e-14|oeu:111379166|K00284 glutamate synthase (ferredoxin) [EC:1.4.7.1] | (RefSeq) ferredoxin-dependent glutamate synthase, chloroplastic-like	Glyoxylate and dicarboxylate metabolism (ko00630);; Nitrogen metabolism (ko00910)	[R]	General function prediction only	--	Retrovirus-related Pol polyprotein from transposon RE1 OS=Arabidopsis thaliana OX=3702 GN=RE1 PE=2 SV=1	L	Replication, recombination and repair	uncharacterized protein LOC110746340 [Prunus avium]
PaF106G0600025621.01	281	206	226	630	785	981	3.97517	3.47447	3.22344	9.86981	12.9095	13.8542	2.39411e-30	1.7524	up	--	--	Molecular Function: transcription factor activity, sequence-specific DNA binding (GO:0003700);;	K09060|1.6e-06|dcr:108209394|K09060 plant G-box-binding factor | (RefSeq) bZIP transcription factor 16-like	--	--	--	Basic leucine-zipper C terminal	Light-inducible protein CPRF2 OS=Petroselinum crispum OX=4043 GN=CPRF2 PE=2 SV=2	K	Transcription	unnamed protein product [Prunus armeniaca]
PaF106G0800030619.01	272	162	165	694	596	647	2.25727	1.62626	1.4155	6.52374	6.06944	5.58002	4.72496e-22	1.69344	up	--	--	Molecular Function: protein kinase activity (GO:0004672);; Molecular Function: ATP binding (GO:0005524);;	K13430|6.6e-28|nta:107764193|K13430 serine/threonine-protein kinase PBS1 [EC:2.7.11.1] | (RefSeq) serine/threonine-protein kinase PBS1-like	Plant-pathogen interaction (ko04626)	--	--	Protein tyrosine and serine/threonine kinase	Proline-rich receptor-like protein kinase PERK12 OS=Arabidopsis thaliana OX=3702 GN=PERK12 PE=2 SV=2	T	Signal transduction mechanisms	unnamed protein product [Prunus armeniaca]
PaF106G0600022540.01	596	557	468	1267	1872	2099	6.1811	6.88763	5.0355	14.2554	22.5922	21.7298	1.1024e-26	1.6876	up	--	--	Molecular Function: calmodulin binding (GO:0005516);; Biological Process: defense response (GO:0006952);; Biological Process: response to biotic stimulus (GO:0009607);; Cellular Component: integral component of membrane (GO:0016021);;	K08472|0.0e+00|pper:18773580|K08472 mlo protein | (RefSeq) MLO-like protein 6	--	--	--	Mlo family	MLO-like protein 6 OS=Arabidopsis thaliana OX=3702 GN=MLO6 PE=2 SV=2	G	Carbohydrate transport and metabolism	MLO1 [Prunus armeniaca]
PaF106G0600025876.01	6	5	8	66	74	83	0.301509	0.285106	0.453671	3.95038	4.77629	4.61533	5.97013e-14	2.53676	up	--	--	Biological Process: carbohydrate metabolic process (GO:0005975);; Molecular Function: glycogen phosphorylase activity (GO:0008184);; Molecular Function: pyridoxal phosphate binding (GO:0030170);; Molecular Function: SHG alpha-glucan phosphorylase activity (GO:0102499);;	K00688|2.0e-22|pmum:103324815|K00688 glycogen phosphorylase [EC:2.4.1.1] | (RefSeq) glycogen phosphorylase 1-like isoform X1	Starch and sucrose metabolism (ko00500)	--	--	Carbohydrate phosphorylase	--	G	Carbohydrate transport and metabolism	unnamed protein product [Prunus armeniaca]
PaF106G0700026933.01	220	132	190	51	75	91	8.77256	6.30707	7.90596	2.19622	3.45325	3.67975	2.33016e-05	-1.07858	down	--	--	Molecular Function: ligand-gated ion channel activity (GO:0015276);; Cellular Component: integral component of membrane (GO:0016021);;	K05387|2.3e-82|pavi:110748851|K05387 glutamate receptor, ionotropic, plant | (RefSeq) glutamate receptor 3.6-like isoform X1	--	[PET]	Inorganic ion transport and metabolism;; Amino acid transport and metabolism;; Signal transduction mechanisms	--	Glutamate receptor 3.6 OS=Arabidopsis thaliana OX=3702 GN=GLR3.6 PE=2 SV=1	--	--	glutamate receptor 3.6-like isoform X1 [Prunus avium]
PaF106G0600022803.01	337	219	309	96	115	93	4.42914	3.44628	4.18754	1.37449	1.76664	1.21347	2.55221e-09	-1.27833	down	--	--	Cellular Component: integral component of membrane (GO:0016021);;	K13946|1.8e-12|ppp:112289353|K13946 auxin influx carrier (AUX1 LAX family) | (RefSeq) auxin transporter protein 1-like	Plant hormone signal transduction (ko04075)	[E]	Amino acid transport and metabolism	Transmembrane amino acid transporter protein	GABA transporter 1 OS=Arabidopsis thaliana OX=3702 GN=GAT1 PE=1 SV=1	E	Amino acid transport and metabolism	unnamed protein product [Prunus armeniaca]
Prunus_sibirica_newGene_2274	0	0	0	44	51	46	0	0	0	0.476918	0.598783	0.463154	4.03583e-14	2.83582	up	--	--	Cellular Component: nucleus (GO:0005634);; Biological Process: chromatin remodeling (GO:0006338);; Molecular Function: histone demethylase activity (GO:0032452);; Molecular Function: histone demethylase activity (H3-trimethyl-K4 specific) (GO:0034647);; Cellular Component: histone methyltransferase complex (GO:0035097);;	--	--	[R]	General function prediction only	Zinc finger, C2H2 type	Probable lysine-specific demethylase ELF6 OS=Arabidopsis thaliana OX=3702 GN=ELF6 PE=1 SV=1	K	Transcription	unnamed protein product [Prunus armeniaca]
PaF106G0600025754.01	110	109	71	8	17	21	1.33835	1.59089	0.893946	0.09747	0.237789	0.253994	6.92503e-09	-1.92116	down	--	--	Cellular Component: plasma membrane (GO:0005886);; Biological Process: carbohydrate transport (GO:0008643);; Cellular Component: integral component of membrane (GO:0016021);; Molecular Function: sugar transmembrane transporter activity (GO:0051119);;	K15382|1.4e-120|pper:18772248|K15382 solute carrier family 50 (sugar transporter) | (RefSeq) bidirectional sugar transporter NEC1	--	[R]	General function prediction only	Sugar efflux transporter for intercellular exchange	Bidirectional sugar transporter NEC1 OS=Petunia hybrida OX=4102 GN=NEC1 PE=2 SV=1	U	Intracellular trafficking, secretion, and vesicular transport	unnamed protein product [Prunus armeniaca]
PaF106G0600022481.01	0	0	0	87	58	73	0	0	0	3.7353	2.65578	2.88402	2.99662e-21	3.42935	up	--	--	Biological Process: mitochondrial RNA metabolic process (GO:0000959);; Biological Process: mitochondrial RNA processing (GO:0000963);; Biological Process: RNA 5'-end processing (GO:0000966);; Molecular Function: molecular_function (GO:0003674);; Molecular Function: nucleic acid binding (GO:0003676);; Molecular Function: RNA binding (GO:0003723);; Molecular Function: catalytic activity (GO:0003824…	--	--	[J]	Translation, ribosomal structure and biogenesis	PPR repeat family	--	S	Function unknown	putative pentatricopeptide repeat-containing protein At1g12700, mitochondrial [Manihot esculenta]
PaF106G0400017564.01	46	32	44	119	165	155	0.93516	0.77553	0.93551	2.99071	3.97477	3.20523	1.75842e-10	1.6765	up	[R]	General function prediction only	Biological Process: mitochondrial respiratory chain complex I assembly (GO:0032981);;	K03070|1.9e-48|pmum:103319773|K03070 preprotein translocase subunit SecA [EC:7.4.2.8] | (RefSeq) protein translocase subunit SECA2, chloroplastic	Protein export (ko03060)	[G]	Carbohydrate transport and metabolism	Complex I intermediate-associated protein 30 (CIA30)	Protein translocase subunit SECA2, chloroplastic OS=Arabidopsis thaliana OX=3702 GN=SECA2 PE=1 SV=1	G	Carbohydrate transport and metabolism	unnamed protein product [Prunus armeniaca]
PaF106G0800031398.01	653	586	710	243	261	330	13.4809	14.6431	15.16	4.88073	5.56742	6.36728	5.45203e-15	-1.10179	down	[J]	Translation, ribosomal structure and biogenesis	Molecular Function: structural constituent of ribosome (GO:0003735);; Biological Process: translation (GO:0006412);; Cellular Component: large ribosomal subunit (GO:0015934);;	K02876|5.3e-54|pmum:103335627|K02876 large subunit ribosomal protein L15 | (RefSeq) 50S ribosomal protein L15-like	Ribosome (ko03010)	[J]	Translation, ribosomal structure and biogenesis	--	--	J	Translation, ribosomal structure and biogenesis	unnamed protein product [Prunus armeniaca]
PaF106G0500020134.01	45	17	61	107	91	133	0.933147	0.418115	1.31613	2.44362	2.2271	2.78161	0.000241877	1.19577	up	--	--	Cellular Component: cell wall (GO:0005618);; Molecular Function: manganese ion binding (GO:0030145);; Molecular Function: nutrient reservoir activity (GO:0045735);; Cellular Component: apoplast (GO:0048046);;	--	--	--	--	Cupin	Germin-like protein subfamily 3 member 4 OS=Arabidopsis thaliana OX=3702 GN=At5g61750 PE=2 SV=1	S	Function unknown	unnamed protein product [Prunus armeniaca]
PaF106G0100000684.01	6	6	0	95	66	102	0.090628	0.097321	0	1.58477	1.16678	1.56025	1.28664e-16	2.88547	up	--	--	Cellular Component: membrane (GO:0016020);; Cellular Component: integral component of membrane (GO:0016021);;	K23544|6.0e-236|pmum:103323847|K23544 serine incorporator 1/3 | (RefSeq) probable serine incorporator	--	[S]	Function unknown	Serine incorporator (Serinc)	--	S	Function unknown	unnamed protein product [Prunus armeniaca]
PaF106G0200007549.01	72	74	111	10	14	20	0.544897	0.6724	0.874777	0.076733	0.121652	0.150421	2.77494e-08	-1.84273	down	--	--	Biological Process: signal transduction (GO:0007165);; Molecular Function: ADP binding (GO:0043531);;	K00695|2.9e-155|mtr:MTR_6g478030|K00695 sucrose synthase [EC:2.4.1.13] | (RefSeq) sucrose synthase	Starch and sucrose metabolism (ko00500)	--	--	TIR domain	TMV resistance protein N OS=Nicotiana glutinosa OX=35889 GN=N PE=1 SV=1	T	Signal transduction mechanisms	TMV resistance protein N-like isoform X3 [Prunus avium]
PaF106G0500019009.01	108	119	128	24	34	36	2.19947	2.91278	2.59295	0.52695	0.897273	0.762721	7.03203e-08	-1.53504	down	--	--	Molecular Function: pantothenate kinase activity (GO:0004594);; Molecular Function: ATP binding (GO:0005524);; Cellular Component: nucleus (GO:0005634);; Cellular Component: cytosol (GO:0005829);; Biological Process: coenzyme A biosynthetic process (GO:0015937);;	K09680|7.5e-35|pavi:110753247|K09680 type II pantothenate kinase [EC:2.7.1.33] | (RefSeq) pantothenate kinase 1 isoform X1	Pantothenate and CoA biosynthesis (ko00770)	[H]	Coenzyme transport and metabolism	Fumble	Pantothenate kinase 2 OS=Arabidopsis thaliana OX=3702 GN=PANK2 PE=1 SV=2	H	Coenzyme transport and metabolism	unnamed protein product [Prunus armeniaca]
PaF106G0100001881.01	263	214	233	474	371	575	2.54312	2.48069	2.32361	5.03867	4.22147	5.61637	8.77058e-11	1.03026	up	[T]	Signal transduction mechanisms	Molecular Function: ion channel activity (GO:0005216);; Cellular Component: integral component of membrane (GO:0016021);;	K05391|1.9e-301|pmum:103327048|K05391 cyclic nucleotide gated channel, plant | (RefSeq) cyclic nucleotide-gated ion channel 1-like	Plant-pathogen interaction (ko04626)	[PT]	Inorganic ion transport and metabolism;; Signal transduction mechanisms	Ion transport protein	Cyclic nucleotide-gated ion channel 1 OS=Arabidopsis thaliana OX=3702 GN=CNGC1 PE=1 SV=1	--	--	unnamed protein product [Prunus armeniaca]
PaF106G0500019684.01	1645	1402	1689	296	287	456	19.9185	20.3162	21.0906	3.89031	4.04959	5.51979	4.68896e-57	-2.04745	down	--	--	Molecular Function: GTPase activity (GO:0003924);; Molecular Function: structural constituent of cytoskeleton (GO:0005200);; Molecular Function: GTP binding (GO:0005525);; Cellular Component: cytoplasm (GO:0005737);; Cellular Component: microtubule (GO:0005874);; Biological Process: microtubule-based process (GO:0007017);;	K07375|2.4e-264|pavi:110758028|K07375 tubulin beta | (RefSeq) tubulin beta chain-like	Phagosome (ko04145)	[Z]	Cytoskeleton	Tubulin/FtsZ family, GTPase domain	Tubulin beta-4 chain OS=Oryza sativa subsp. japonica OX=39947 GN=TUBB4 PE=2 SV=1	Z	Cytoskeleton	PREDICTED: tubulin beta chain-like [Prunus mume]
PaF106G0100002088.01	488	256	245	118	138	157	5.43571	3.41162	2.81476	1.42582	1.79016	1.74464	1.32559e-05	-1.03505	down	[GI]	Carbohydrate transport and metabolism;; Lipid transport and metabolism	Molecular Function: pectinesterase activity (GO:0030599);; Biological Process: cell wall modification (GO:0042545);; Molecular Function: aspartyl esterase activity (GO:0045330);; Biological Process: pectin catabolic process (GO:0045490);; Molecular Function: pectinesterase inhibitor activity (GO:0046910);;	K01051|5.0e-132|hbr:110663013|K01051 pectinesterase [EC:3.1.1.11] | (RefSeq) pectinesterase 2-like isoform X1	Pentose and glucuronate interconversions (ko00040)	--	--	Pectinesterase	Probable pectinesterase/pectinesterase inhibitor 35 OS=Arabidopsis thaliana OX=3702 GN=PME35 PE=2 SV=1	T	Signal transduction mechanisms	unnamed protein product [Prunus armeniaca]
PaF106G0300012100.01	128	74	126	41	20	36	6.40656	3.93991	5.91754	1.76022	0.94641	1.60599	1.65082e-05	-1.33431	down	--	--	Biological Process: telomere maintenance (GO:0000723);; Molecular Function: single-stranded DNA binding (GO:0003697);; Biological Process: response to heat (GO:0009408);; Molecular Function: telomerase inhibitor activity (GO:0010521);; Biological Process: stem cell population maintenance (GO:0019827);; Molecular Function: protein binding involved in protein folding (GO:0044183);; Biological Proce…	K23313|6.6e-17|pper:18785651|K23313 CST complex subunit TEN1 | (RefSeq) CST complex subunit TEN1 isoform X1	--	--	--	Telomere-capping, CST complex subunit	CST complex subunit TEN1 OS=Arabidopsis thaliana OX=3702 GN=TEN1 PE=1 SV=1	S	Function unknown	unnamed protein product [Prunus armeniaca]
PaF106G0800031436.01	1032	801	648	305	260	241	35.7783	33.2449	23.1704	11.4832	10.4949	8.35594	2.52052e-15	-1.42703	down	--	--	Molecular Function: DNA binding (GO:0003677);; Cellular Component: nucleus (GO:0005634);;	K15397|4.2e-20|cpep:111776416|K15397 3-ketoacyl-CoA synthase [EC:2.3.1.199] | (RefSeq) 3-ketoacyl-CoA synthase 17-like	Fatty acid elongation (ko00062);; Plant-pathogen interaction (ko04626)	[O]	Posttranslational modification, protein turnover, chaperones	Myb-like DNA-binding domain	Protein RADIALIS-like 1 OS=Arabidopsis thaliana OX=3702 GN=RL1 PE=2 SV=1	K	Transcription	unnamed protein product [Prunus armeniaca]
PaF106G0400018270.01	62	48	48	6	0	5	0.508488	0.470264	0.40544	0.048378	0	0.03624	1.73476e-08	-2.11626	down	[O]	Posttranslational modification, protein turnover, chaperones	Molecular Function: serine-type endopeptidase activity (GO:0004252);;	K15333|1.4e-177|nsy:104224633|K15333 tRNA guanosine-2'-O-methyltransferase [EC:2.1.1.34] | (RefSeq) uncharacterized protein LOC104224633	--	--	--	Subtilase family	Subtilisin-like protease SBT2.4 OS=Arabidopsis thaliana OX=3702 GN=SBT2.4 PE=1 SV=1	O	Posttranslational modification, protein turnover, chaperones	PREDICTED: subtilisin-like protease SBT2.4 [Prunus mume]
PaF106G0400014719.01	144	134	164	775	631	817	0.697552	0.779283	0.819279	4.1025	3.5824	3.98012	2.89106e-56	2.31411	up	[R]	General function prediction only	Biological Process: signal transduction (GO:0007165);; Molecular Function: ADP binding (GO:0043531);;	K00695|2.7e-157|mtr:MTR_6g478030|K00695 sucrose synthase [EC:2.4.1.13] | (RefSeq) sucrose synthase	Starch and sucrose metabolism (ko00500)	--	--	TIR domain	Disease resistance protein Roq1 OS=Nicotiana benthamiana OX=4100 GN=ROQ1 PE=1 SV=1	--	--	PREDICTED: disease resistance protein TAO1-like [Prunus mume]
PaF106G0800032329.01	175	165	130	72	45	74	1.34739	1.54994	1.09298	0.596696	0.403031	0.563639	4.39129e-05	-1.06787	down	--	--	Molecular Function: zinc ion binding (GO:0008270);; Biological Process: RNA modification (GO:0009451);; Cellular Component: intracellular membrane-bounded organelle (GO:0043231);;	K22733|1.8e-29|cit:102612526|K22733 magnesium transporter | (RefSeq) uncharacterized protein LOC102612526	--	[R]	General function prediction only	DYW family of nucleic acid deaminases	Pentatricopeptide repeat-containing protein At4g32450, mitochondrial OS=Arabidopsis thaliana OX=3702 GN=PCMP-H63 PE=2 SV=1	S	Function unknown	hypothetical protein PRUPE_8G043900 [Prunus persica]
PaF106G0500020339.01	1777	1398	1383	2620	3044	3345	25.0243	24.3437	20.5746	42.3988	51.7527	49.4572	1.68475e-23	1.05209	up	--	--	Molecular Function: mRNA binding (GO:0003729);; Molecular Function: metal ion binding (GO:0046872);;	K12198|6.2e-18|pavi:110771223|K12198 charged multivesicular body protein 5 | (RefSeq) vacuolar protein sorting-associated protein 60.1-like isoform X1	Endocytosis (ko04144)	[R]	General function prediction only	Zinc finger C-x8-C-x5-C-x3-H type (and similar)	Zinc finger CCCH domain-containing protein 8 OS=Oryza sativa subsp. japonica OX=39947 GN=Os01g0616400 PE=2 SV=2	S	Function unknown	unnamed protein product [Prunus armeniaca]
PaF106G0100000524.01	656	598	665	1584	1266	1358	4.90501	5.35091	5.13134	12.9022	11.06	10.1713	1.47694e-20	1.18882	up	--	--	Molecular Function: inositol hexakisphosphate binding (GO:0000822);; Cellular Component: cytoplasm (GO:0005737);; Cellular Component: Golgi apparatus (GO:0005794);; Cellular Component: trans-Golgi network (GO:0005802);; Cellular Component: plasma membrane (GO:0005886);; Biological Process: polyphosphate biosynthetic process (GO:0006799);; Biological Process: phosphate ion transport (GO:0006817);;…	K24195|0.0e+00|pmum:103324066|K24195 xenotropic and polytropic retrovirus receptor 1 | (RefSeq) phosphate transporter PHO1	--	[U]	Intracellular trafficking, secretion, and vesicular transport	EXS family	Phosphate transporter PHO1 OS=Arabidopsis thaliana OX=3702 GN=PHO1 PE=1 SV=1	U	Intracellular trafficking, secretion, and vesicular transport	PREDICTED: phosphate transporter PHO1 [Prunus mume]
PaF106G0700027938.01	2099	2073	2465	891	684	1094	26.9796	31.8901	32.6895	12.4583	10.2542	14.0765	5.03023e-21	-1.20556	down	[R]	General function prediction only	Cellular Component: endoplasmic reticulum (GO:0005783);; Biological Process: auxin metabolic process (GO:0009850);; Molecular Function: IAA-Ala conjugate hydrolase activity (GO:0010179);; Molecular Function: hydrolase activity (GO:0016787);;	K14664|1.7e-246|pmum:103341727|K14664 IAA-amino acid hydrolase [EC:3.5.1.-] | (RefSeq) IAA-amino acid hydrolase ILR1-like	--	--	--	Peptidase family M20/M25/M40	IAA-amino acid hydrolase ILR1 OS=Arabidopsis thaliana OX=3702 GN=ILR1 PE=1 SV=2	S	Function unknown	PREDICTED: IAA-amino acid hydrolase ILR1-like [Prunus mume]
Prunus_sibirica_newGene_1558	14	10	10	45	44	57	0.320155	0.259305	0.237542	1.15542	1.2142	1.35319	1.69811e-05	1.52949	up	--	--	Biological Process: ubiquitin-dependent protein catabolic process (GO:0006511);; Cellular Component: integral component of membrane (GO:0016021);; Biological Process: protein deubiquitination (GO:0016579);; Molecular Function: thiol-dependent ubiquitinyl hydrolase activity (GO:0036459);;	K11841|5.4e-10|pavi:110771125|K11841 ubiquitin carboxyl-terminal hydrolase 10 [EC:3.4.19.12] | (RefSeq) ubiquitin carboxyl-terminal hydrolase 24-like	--	--	--	--	--	--	--	unnamed protein product [Prunus armeniaca]
PaF106G0400017695.01	8202	4183	7979	1538	1593	2086	145.755	88.9537	146.266	29.7314	33.0268	37.1053	9.79292e-31	-1.77926	down	[IR]	Lipid transport and metabolism;; General function prediction only	Molecular Function: hydrolase activity, acting on ester bonds (GO:0016788);;	K10691|1.5e-65|ats:109762802|K10691 E3 ubiquitin-protein ligase UBR4 [EC:2.3.2.27] | (RefSeq) LOC109762802; auxin transport protein BIG	--	--	--	GDSL-like Lipase/Acylhydrolase	GDSL esterase/lipase At5g45950 OS=Arabidopsis thaliana OX=3702 GN=At5g45950 PE=2 SV=1	I	Lipid transport and metabolism	PREDICTED: GDSL esterase/lipase At5g45950 [Prunus mume]
PaF106G0400017640.01	579	526	582	1681	1529	1731	6.66437	6.32641	6.32896	15.7934	15.4238	15.5377	1.05752e-56	1.60716	up	[O]	Posttranslational modification, protein turnover, chaperones	Molecular Function: cysteine-type endopeptidase activity (GO:0004197);; Cellular Component: extracellular space (GO:0005615);; Cellular Component: lysosome (GO:0005764);; Biological Process: proteolysis involved in cellular protein catabolic process (GO:0051603);;	K16292|6.0e-130|gmx:102666929|K16292 KDEL-tailed cysteine endopeptidase [EC:3.4.22.-] | (RefSeq) senescence-specific cysteine protease SAG39	--	[O]	Posttranslational modification, protein turnover, chaperones	Papain family cysteine protease	Senescence-specific cysteine protease SAG39 OS=Oryza sativa subsp. indica OX=39946 GN=OsI_14861 PE=3 SV=1	O	Posttranslational modification, protein turnover, chaperones	Maternal effect embryo arrest 18 [Theobroma cacao]
PaF106G0600023074.01	58	49	91	191	351	309	1.35518	1.37617	2.21244	4.89106	9.65912	7.28646	5.66289e-13	1.89138	up	[IQR]	Lipid transport and metabolism;; Secondary metabolites biosynthesis, transport and catabolism;; General function prediction only	Molecular Function: oxidoreductase activity (GO:0016491);;	K13070|1.4e-76|dosa:Os04t0179200-01|K13070 momilactone-A synthase [EC:1.1.1.295] | (RefSeq) Os04g0179200, MAS, MOMILACTONE_A_SYNTHASE; Similar to Stem secoisolariciresinol dehydrogenase (Fragment).	Diterpenoid biosynthesis (ko00904)	[R]	General function prediction only	Enoyl-(Acyl carrier protein) reductase	Secoisolariciresinol dehydrogenase (Fragment) OS=Forsythia intermedia OX=55183 PE=1 SV=1	Q	Secondary metabolites biosynthesis, transport and catabolism	unnamed protein product [Prunus armeniaca]
PaF106G0600023307.01	106	66	61	251	237	198	1.85382	1.40679	1.05475	4.75488	4.75895	3.44064	1.30463e-09	1.4794	up	[I]	Lipid transport and metabolism	Molecular Function: 3-hydroxyisobutyryl-CoA hydrolase activity (GO:0003860);; Biological Process: valine catabolic process (GO:0006574);;	K05605|1.8e-83|pper:18781659|K05605 3-hydroxyisobutyryl-CoA hydrolase [EC:3.1.2.4] | (RefSeq) 3-hydroxyisobutyryl-CoA hydrolase-like protein 5 isoform X1	Valine, leucine and isoleucine degradation (ko00280);; beta-Alanine metabolism (ko00410);; Propanoate metabolism (ko00640);; Carbon metabolism (ko01200)	--	--	Enoyl-CoA hydratase/isomerase	3-hydroxyisobutyryl-CoA hydrolase-like protein 5 OS=Arabidopsis thaliana OX=3702 GN=At1g06550 PE=1 SV=2	I	Lipid transport and metabolism	unnamed protein product [Prunus armeniaca]
PaF106G0100001729.01	262	231	201	464	481	655	2.13643	2.25391	1.6879	4.12393	4.58124	5.35972	1.52766e-14	1.22264	up	--	--	Cellular Component: integral component of membrane (GO:0016021);;	--	--	--	--	--	--	--	--	uncharacterized protein LOC18788869 [Prunus persica]
PaF106G0800031033.01	180	109	155	35	46	49	2.29998	1.68713	2.03547	0.487812	0.681455	0.656223	4.94498e-08	-1.44204	down	[Q]	Secondary metabolites biosynthesis, transport and catabolism	Molecular Function: diacylglycerol O-acyltransferase activity (GO:0004144);; Cellular Component: integral component of membrane (GO:0016021);; Biological Process: glycerolipid biosynthetic process (GO:0045017);;	K15406|5.4e-55|bna:106451554|K15406 wax-ester synthase / diacylglycerol O-acyltransferase [EC:2.3.1.75 2.3.1.20] | (RefSeq) O-acyltransferase WSD1	Cutin, suberine and wax biosynthesis (ko00073)	--	--	WS/DGAT C-terminal domain	O-acyltransferase WSD1 OS=Arabidopsis thaliana OX=3702 GN=WSD1 PE=2 SV=1	S	Function unknown	PREDICTED: O-acyltransferase WSD1-like [Prunus mume]
PaF106G0700026580.01	765	766	715	1787	2335	2943	13.4736	16.171	13.1714	36.1024	48.0676	52.6746	5.88663e-34	1.66434	up	[R]	General function prediction only	Molecular Function: O-methyltransferase activity (GO:0008171);; Biological Process: methylation (GO:0032259);;	K00588|2.2e-134|pmum:103340769|K00588 caffeoyl-CoA O-methyltransferase [EC:2.1.1.104] | (RefSeq) probable caffeoyl-CoA O-methyltransferase At4g26220	Phenylpropanoid biosynthesis (ko00940);; Flavonoid biosynthesis (ko00941);; Stilbenoid, diarylheptanoid and gingerol biosynthesis (ko00945)	[Q]	Secondary metabolites biosynthesis, transport and catabolism	O-methyltransferase	Probable caffeoyl-CoA O-methyltransferase At4g26220 OS=Arabidopsis thaliana OX=3702 GN=At4g26220 PE=2 SV=1	Q	Secondary metabolites biosynthesis, transport and catabolism	unnamed protein product [Prunus armeniaca]
PaF106G0100000111.01	115	84	113	14	19	16	3.49565	3.03472	3.55125	0.437239	0.648825	0.4624	1.9015e-11	-2.04021	down	[G]	Carbohydrate transport and metabolism	Molecular Function: molecular_function (GO:0003674);; Cellular Component: cellular_component (GO:0005575);; Cellular Component: intracellular (GO:0005622);; Cellular Component: cell (GO:0005623);; Cellular Component: nucleus (GO:0005634);; Biological Process: carbohydrate metabolic process (GO:0005975);; Biological Process: cellular protein modification process (GO:0006464);; Biological Process: …	K12160|2.1e-38|pmum:103324257|K12160 small ubiquitin-related modifier | (RefSeq) small ubiquitin-related modifier 1-like	RNA transport (ko03013)	[O]	Posttranslational modification, protein turnover, chaperones	Ubiquitin-2 like Rad60 SUMO-like	Alpha-glucan phosphorylase, H isozyme OS=Vicia faba OX=3906 PE=2 SV=1	O	Posttranslational modification, protein turnover, chaperones	small ubiquitin-related modifier 1 [Prunus persica]
PaF106G0500018645.01	377	266	341	806	755	707	8.36293	7.06581	7.80273	19.5046	19.589	15.7257	5.69447e-17	1.25599	up	[G]	Carbohydrate transport and metabolism	Biological Process: carbohydrate metabolic process (GO:0005975);; Molecular Function: glycogen phosphorylase activity (GO:0008184);; Molecular Function: pyridoxal phosphate binding (GO:0030170);; Molecular Function: SHG alpha-glucan phosphorylase activity (GO:0102499);;	K00688|4.5e-61|pmum:103324815|K00688 glycogen phosphorylase [EC:2.4.1.1] | (RefSeq) glycogen phosphorylase 1-like isoform X1	Starch and sucrose metabolism (ko00500)	[G]	Carbohydrate transport and metabolism	Carbohydrate phosphorylase	Alpha-glucan phosphorylase, H isozyme OS=Vicia faba OX=3906 PE=2 SV=1	G	Carbohydrate transport and metabolism	PREDICTED: alpha-glucan phosphorylase, H isozyme-like [Prunus mume]
PaF106G0200007456.01	380	287	311	76	100	108	8.44924	7.62568	7.12408	1.82653	2.57991	2.39494	3.87542e-16	-1.57241	down	[M]	Cell wall/membrane/envelope biogenesis	Molecular Function: transferase activity (GO:0016740);;	--	--	--	--	--	Protein CDI OS=Arabidopsis thaliana OX=3702 GN=CDI PE=2 SV=1	--	--	unnamed protein product [Prunus armeniaca]
PaF106G0300014486.01	901	595	790	1212	1385	1955	14.0601	11.8365	12.8596	19.0131	25.4558	30.9571	1.53578e-13	1.03976	up	[R]	General function prediction only	Molecular Function: molecular_function (GO:0003674);; Molecular Function: catalytic activity (GO:0003824);; Biological Process: cellular aldehyde metabolic process (GO:0006081);; Biological Process: organic acid metabolic process (GO:0006082);; Biological Process: lactate metabolic process (GO:0006089);; Biological Process: biological_process (GO:0008150);; Biological Process: metabolic process (…	K18881|1.9e-127|pmum:103327333|K18881 D-lactate dehydratase [EC:4.2.1.130] | (RefSeq) protein DJ-1 homolog D-like	Pyruvate metabolism (ko00620)	[RV]	General function prediction only;; Defense mechanisms	DJ-1/PfpI family	Protein DJ-1 homolog D OS=Arabidopsis thaliana OX=3702 GN=DJ1D PE=1 SV=1	V	Defense mechanisms	PREDICTED: protein DJ-1 homolog D-like [Prunus mume]
PaF106G0100000452.01	374	304	366	76	69	142	7.11154	6.95765	7.19614	1.61448	1.5336	2.67528	2.54015e-14	-1.63701	down	[Q]	Secondary metabolites biosynthesis, transport and catabolism	Molecular Function: metal ion binding (GO:0046872);; Molecular Function: dioxygenase activity (GO:0051213);;	K13229|1.1e-81|ats:109766943|K13229 2,4-dihydroxy-1,4-benzoxazin-3-one-glucoside dioxygenase [EC:1.14.11.59] | (RefSeq) LOC109766943; DIBOA-glucoside dioxygenase BX6-like	Benzoxazinoid biosynthesis (ko00402)	[QR]	Secondary metabolites biosynthesis, transport and catabolism;; General function prediction only	2OG-Fe(II) oxygenase superfamily	1-aminocyclopropane-1-carboxylate oxidase homolog 1 OS=Arabidopsis thaliana OX=3702 GN=At1g06620 PE=2 SV=1	Q	Secondary metabolites biosynthesis, transport and catabolism	PREDICTED: 1-aminocyclopropane-1-carboxylate oxidase homolog 1-like [Prunus mume]
PaF106G0800031588.01	688	513	499	227	234	288	27.5009	24.5419	20.5603	9.87716	10.8872	11.4961	9.45253e-12	-1.04682	down	--	--	Biological Process: response to auxin (GO:0009733);;	K14488|3.4e-73|pper:18768105|K14488 SAUR family protein | (RefSeq) auxin-responsive protein SAUR50	Plant hormone signal transduction (ko04075)	--	--	Auxin responsive protein	Auxin-responsive protein SAUR50 OS=Arabidopsis thaliana OX=3702 GN=SAUR50 PE=1 SV=1	S	Function unknown	auxin-responsive protein SAUR50 [Prunus persica]
PaF106G0800032823.01	181	142	121	28	25	25	2.69855	2.4684	1.8338	0.426325	0.40744	0.356742	1.29942e-13	-2.02995	down	--	--	Cellular Component: integral component of membrane (GO:0016021);;	--	--	--	--	--	--	S	Function unknown	hypothetical protein PRUPE_2G317900 [Prunus persica]
PaF106G0800032137.01	218	158	271	1	0	1	3.63295	3.15297	4.67626	0.009529	0	0.004775	1.09212e-46	-4.65636	down	--	--	Molecular Function: protein binding (GO:0005515);; Biological Process: biological_process (GO:0008150);; Biological Process: tissue development (GO:0009888);; Biological Process: meristem maintenance (GO:0010073);; Biological Process: multicellular organismal process (GO:0032501);; Biological Process: developmental process (GO:0032502);; Biological Process: meristem development (GO:0048507);; Bio…	--	--	[R]	General function prediction only	Leucine rich repeat	Receptor-like protein 7 OS=Arabidopsis thaliana OX=3702 GN=RLP7 PE=3 SV=2	S	Function unknown	receptor like protein 30-like [Prunus avium]
PaF106G0600021566.01	53	25	46	298	239	348	0.413644	0.235091	0.374087	2.57303	2.21069	2.76122	9.25449e-31	2.6173	up	--		Molecular Function: protein serine/threonine kinase activity (GO:0004674);; Molecular Function: ATP binding (GO:0005524);; Cellular Component: integral component of membrane (GO:0016021);; Molecular Function: carbohydrate binding (GO:0030246);; Biological Process: recognition of pollen (GO:0048544);;	K13416|6.6e-58|mdm:103416332|K13416 brassinosteroid insensitive 1-associated receptor kinase 1 [EC:2.7.10.1 2.7.11.1] | (RefSeq) BRASSINOSTEROID INSENSITIVE 1-associated receptor kinase 1-like isoform X1	MAPK signaling pathway - plant (ko04016);; Plant hormone signal transduction (ko04075);; Plant-pathogen interaction (ko04626)	--	--	Protein kinase domain	G-type lectin S-receptor-like serine/threonine-protein kinase RLK1 OS=Arabidopsis thaliana OX=3702 GN=RLK1 PE=2 SV=2	T	Signal transduction mechanisms	PREDICTED: G-type lectin S-receptor-like serine/threonine-protein kinase RLK1 [Prunus mume]
PaF106G0100001766.01	328	166	252	446	685	689	5.38591	3.25038	4.27584	7.97237	13.1541	11.3356	3.74467e-10	1.28574	up	--	--	Molecular Function: aspartic-type endopeptidase activity (GO:0004190);;	--	--	[O]	Posttranslational modification, protein turnover, chaperones	Xylanase inhibitor C-terminal	Probable aspartic proteinase GIP2 OS=Nicotiana benthamiana OX=4100 GN=GIP2 PE=1 SV=1	O	Posttranslational modification, protein turnover, chaperones	probable aspartic proteinase GIP2 [Prunus dulcis]
Prunus_sibirica_newGene_343	112	98	98	270	347	306	2.13329	2.58619	1.85033	6.4213	8.97683	7.1965	9.08916e-15	1.55169	up	--	--	Molecular Function: RNA polymerase II core promoter proximal region sequence-specific DNA binding (GO:0000978);; Molecular Function: chromatin binding (GO:0003682);; Cellular Component: nucleus (GO:0005634);; Biological Process: pollen development (GO:0009555);; Molecular Function: protein dimerization activity (GO:0046983);; Biological Process: anther wall tapetum development (GO:0048658);;	--	--	--	--	--	--	K	Transcription	transcription factor ABORTED MICROSPORES [Prunus persica]
PaF106G0100000807.01	163	134	128	291	258	317	3.69285	3.63641	3.00131	7.1806	6.82889	7.19692	6.49342e-09	1.04883	up	--	--	Cellular Component: mitochondrion (GO:0005739);; Biological Process: RNA modification (GO:0009451);; Cellular Component: intracellular membrane-bounded organelle (GO:0043231);;	K22262|5.8e-31|qsu:112034235|K22262 WD repeat and FYVE domain-containing protein 3 | (RefSeq) protein SPIRRIG	--	[R]	General function prediction only	PPR repeat family	Putative pentatricopeptide repeat-containing protein At3g15130 OS=Arabidopsis thaliana OX=3702 GN=PCMP-H86 PE=3 SV=1	S	Function unknown	putative pentatricopeptide repeat-containing protein At3g25970 [Prunus dulcis]
PaF106G0100001994.01	1449	1135	1048	437	347	386	23.7266	22.2331	17.7081	7.777	6.62218	6.33337	1.4898e-25	-1.48085	down	--	--	Molecular Function: molecular_function (GO:0003674);; Molecular Function: nucleic acid binding (GO:0003676);; Molecular Function: DNA binding (GO:0003677);; Molecular Function: double-stranded DNA binding (GO:0003690);; Molecular Function: single-stranded DNA binding (GO:0003697);; Molecular Function: RNA binding (GO:0003723);; Molecular Function: binding (GO:0005488);; Cellular Component: cellul…	--	--	--	--	--	Protein EMBRYONIC FLOWER 1 OS=Arabidopsis thaliana OX=3702 GN=EMF1 PE=1 SV=1	S	Function unknown	unnamed protein product [Prunus armeniaca]
PaF106G0300011917.01	7	0	7	126	86	81	0.05193	0	0.057578	1.14351	0.836687	0.69534	7.29523e-17	2.90524	up	[T]	Signal transduction mechanisms	Molecular Function: protein serine/threonine kinase activity (GO:0004674);; Molecular Function: ATP binding (GO:0005524);; Cellular Component: plasma membrane (GO:0005886);; Biological Process: protein phosphorylation (GO:0006468);; Cellular Component: integral component of membrane (GO:0016021);; Biological Process: recognition of pollen (GO:0048544);;	K24104|2.7e-75|thj:104799061|K24104 GPN-loop GTPase | (RefSeq) LOW QUALITY PROTEIN: uncharacterized protein LOC104799061	--	--	--	Protein tyrosine and serine/threonine kinase	Receptor-like serine/threonine-protein kinase SD1-8 OS=Arabidopsis thaliana OX=3702 GN=SD18 PE=1 SV=1	T	Signal transduction mechanisms	unnamed protein product [Prunus armeniaca]
PaF106G0200009647.01	0	0	0	91	80	121	0	0	0	1.93035	1.71577	2.38579	1.72974e-28	3.88555	up	--	--	Molecular Function: protein kinase activity (GO:0004672);; Molecular Function: ATP binding (GO:0005524);; Cellular Component: integral component of membrane (GO:0016021);;	K05391|3.8e-77|pmum:103322391|K05391 cyclic nucleotide gated channel, plant | (RefSeq) cyclic nucleotide-gated ion channel 1-like	Plant-pathogen interaction (ko04626)	[PT]	Inorganic ion transport and metabolism;; Signal transduction mechanisms	--	Cyclic nucleotide-gated ion channel 1 OS=Arabidopsis thaliana OX=3702 GN=CNGC1 PE=1 SV=1	--	--	cyclic nucleotide-gated ion channel 1 [Prunus persica]
PaF106G0200007498.01	980	888	828	277	282	397	15.3169	17.0184	13.8154	5.2346	5.31577	6.4801	8.10606e-24	-1.3711	down	--	--	Molecular Function: thiol-dependent ubiquitin-specific protease activity (GO:0004843);;	K21343|1.6e-48|pavi:110769162|K21343 ubiquitin carboxyl-terminal hydrolase 15 [EC:3.4.19.12] | (RefSeq) ubiquitin carboxyl-terminal hydrolase 8 isoform X1	--	--	--	--	Ubiquitin carboxyl-terminal hydrolase 8 OS=Arabidopsis thaliana OX=3702 GN=UBP8 PE=2 SV=2	O	Posttranslational modification, protein turnover, chaperones	unnamed protein product [Prunus armeniaca]
PaF106G0300013971.01	226	152	198	737	701	957	1.67445	1.34309	1.51124	5.94713	6.06982	7.10693	2.99383e-49	2.06289	up	--	--	Biological Process: telomere maintenance (GO:0000723);; Molecular Function: DNA helicase activity (GO:0003678);; Molecular Function: ATP binding (GO:0005524);; Biological Process: DNA repair (GO:0006281);; Biological Process: DNA recombination (GO:0006310);;	K07466|2.2e-119|pper:18792188|K07466 replication factor A1 | (RefSeq) replication protein A 70 kDa DNA-binding subunit B	DNA replication (ko03030);; Nucleotide excision repair (ko03420);; Mismatch repair (ko03430);; Homologous recombination (ko03440)	--	--	Replication factor-A C terminal domain	--	L	Replication, recombination and repair	unnamed protein product [Prunus armeniaca]
PaF106G0100006388.01	375	228	271	648	713	822	2.09764	1.52264	1.55988	3.94546	4.65142	4.6007	2.5662e-19	1.35846	up	[R]	General function prediction only	Biological Process: signal transduction (GO:0007165);; Molecular Function: ADP binding (GO:0043531);;	K00695|5.2e-84|mtr:MTR_6g478030|K00695 sucrose synthase [EC:2.4.1.13] | (RefSeq) sucrose synthase	Starch and sucrose metabolism (ko00500)	--	--	NB-ARC domain	TMV resistance protein N OS=Nicotiana glutinosa OX=35889 GN=N PE=1 SV=1	T	Signal transduction mechanisms	TMV resistance protein N [Prunus persica]
PaF106G0800032650.01	165	187	170	20	28	40	1.02453	1.38963	1.08993	0.131883	0.200738	0.243386	2.07463e-15	-2.12484	down	[R]	General function prediction only	Biological Process: signal transduction (GO:0007165);; Molecular Function: ADP binding (GO:0043531);;	K00695|1.7e-117|mtr:MTR_6g478030|K00695 sucrose synthase [EC:2.4.1.13] | (RefSeq) sucrose synthase	Starch and sucrose metabolism (ko00500)	--	--	TIR domain	TMV resistance protein N OS=Nicotiana glutinosa OX=35889 GN=N PE=1 SV=1	S	Function unknown	PREDICTED: TMV resistance protein N-like [Prunus mume]
Prunus_sibirica_newGene_1504	93	61	54	13	10	35	1.69653	1.32446	1.01903	0.245701	0.210604	0.627975	0.000646547	-1.24368	down	--	--	Molecular Function: protein serine/threonine kinase activity (GO:0004674);; Molecular Function: ATP binding (GO:0005524);; Cellular Component: integral component of membrane (GO:0016021);; Biological Process: recognition of pollen (GO:0048544);;	--	--	--	--	D-mannose binding lectin	S-locus-specific glycoprotein BS29-2 OS=Brassica oleracea var. alboglabra OX=3714 GN=SLSG PE=2 SV=1	T	Signal transduction mechanisms	PREDICTED: S-locus-specific glycoprotein S6-like [Prunus mume]
PaF106G0400015902.01	12958	11780	11821	575	1299	1077	132.571	144.233	124.754	6.39286	15.5065	11.0324	3.63108e-23	-2.87399	down	--	--	Molecular Function: magnesium ion binding (GO:0000287);; Molecular Function: terpene synthase activity (GO:0010333);;	K15803|0.0e+00|pmum:103343924|K15803 (-)-germacrene D synthase [EC:4.2.3.75] | (RefSeq) (-)-alpha-pinene synthase-like	Sesquiterpenoid and triterpenoid biosynthesis (ko00909)	--	--	Terpene synthase family, metal binding domain	(-)-alpha-pinene synthase OS=Fragaria vesca OX=57918 PE=1 SV=2	S	Function unknown	PREDICTED: (-)-alpha-pinene synthase-like [Prunus mume]
PaF106G0100003267.01	343	364	289	104	125	136	8.90003	10.9525	7.01134	2.68449	3.4601	3.26003	2.34557e-10	-1.26833	down	--	--	Biological Process: response to water deprivation (GO:0009414);; Cellular Component: plasmodesma (GO:0009506);; Biological Process: response to abscisic acid (GO:0009737);; Cellular Component: integral component of membrane (GO:0016021);; Biological Process: hyperosmotic salinity response (GO:0042538);;	K17279|2.4e-101|pmum:103321596|K17279 receptor expression-enhancing protein 5/6 | (RefSeq) HVA22-like protein c	--	[U]	Intracellular trafficking, secretion, and vesicular transport	TB2/DP1, HVA22 family	HVA22-like protein c OS=Arabidopsis thaliana OX=3702 GN=HVA22C PE=2 SV=1	U	Intracellular trafficking, secretion, and vesicular transport	unnamed protein product [Prunus armeniaca]
PaF106G0400015294.01	284	165	241	0	0	0	3.9944	2.77133	3.50505	0	0	0	2.79819e-51	-4.90884	down	--	--	Cellular Component: integral component of membrane (GO:0016021);;	--	--	--	--	Leucine rich repeat	Phytosulfokine receptor 2 OS=Arabidopsis thaliana OX=3702 GN=PSKR2 PE=1 SV=1	T	Signal transduction mechanisms	PREDICTED: receptor-like protein 2 [Prunus mume]
PaF106G0500019637.01	42	39	41	138	115	104	0.701841	0.778419	0.711005	2.54844	2.26595	1.75473	4.62111e-07	1.39693	up	--	--	Molecular Function: protein binding (GO:0005515);;	--	--	--	--	Protein of unknown function (DUF295)	--	--	--	F-box protein At2g17036-like [Prunus dulcis]
PaF106G0300014492.01	943	666	811	2515	2699	3805	16.5747	14.0028	14.6915	48.1012	55.3746	66.947	1.90115e-62	1.93049	up	[R]	General function prediction only	Molecular Function: molecular_function (GO:0003674);; Molecular Function: catalytic activity (GO:0003824);; Biological Process: cellular aldehyde metabolic process (GO:0006081);; Biological Process: organic acid metabolic process (GO:0006082);; Biological Process: lactate metabolic process (GO:0006089);; Biological Process: biological_process (GO:0008150);; Biological Process: metabolic process (…	K18881|2.8e-227|pmum:103327333|K18881 D-lactate dehydratase [EC:4.2.1.130] | (RefSeq) protein DJ-1 homolog D-like	Pyruvate metabolism (ko00620)	[RV]	General function prediction only;; Defense mechanisms	DJ-1/PfpI family	Protein DJ-1 homolog D OS=Arabidopsis thaliana OX=3702 GN=DJ1D PE=1 SV=1	V	Defense mechanisms	PREDICTED: protein DJ-1 homolog D-like [Prunus mume]
PaF106G0100001468.01	1317	652	1034	220	277	246	35.942	21.2827	29.1058	6.52586	8.81751	6.70859	1.96992e-21	-1.77027	down	--	--	Molecular Function: protein phosphatase inhibitor activity (GO:0004864);; Biological Process: defense response (GO:0006952);; Biological Process: response to biotic stimulus (GO:0009607);; Biological Process: abscisic acid-activated signaling pathway (GO:0009738);; Molecular Function: abscisic acid binding (GO:0010427);; Molecular Function: signaling receptor activity (GO:0038023);;	--	--	--	--	Pathogenesis-related protein Bet v 1 family	Major strawberry allergen Fra a 1.08 OS=Fragaria ananassa OX=3747 GN=Fra a 1.08 PE=1 SV=1	S	Function unknown	PREDICTED: major allergen Pru ar 1-like isoform X1 [Prunus mume]
PaF106G0200007284.01	387	342	374	142	115	129	5.16991	5.34066	5.12959	2.01027	1.75577	1.68955	1.67208e-14	-1.34344	down	--	--	Molecular Function: double-stranded DNA binding (GO:0003690);; Biological Process: regulation of transcription, DNA-templated (GO:0006355);;	K15032|2.4e-70|pper:109947478|K15032 mTERF domain-containing protein, mitochondrial | (RefSeq) transcription termination factor MTERF15, mitochondrial-like	--	[KR]	Transcription;; General function prediction only	mTERF	--	K	Transcription	transcription termination factor MTERF15, mitochondrial-like [Prunus dulcis]
PaF106G0100002794.01	135	129	101	43	26	46	1.57317	1.79732	1.21003	0.539947	0.345974	0.531605	3.12443e-06	-1.33409	down	--	--	Molecular Function: iron ion binding (GO:0005506);; Cellular Component: membrane (GO:0016020);; Molecular Function: oxidoreductase activity, acting on paired donors, with incorporation or reduction of molecular oxygen, NAD(P)H as one donor, and incorporation of one atom of oxygen (GO:0016709);; Molecular Function: heme binding (GO:0020037);;	K23810|7.5e-70|vvi:100254114|K23810 (E)-8-carboxylinalool synthase [EC:1.14.14.-] | (RefSeq) geraniol 8-hydroxylase	Monoterpenoid biosynthesis (ko00902)	[Q]	Secondary metabolites biosynthesis, transport and catabolism	Cytochrome P450	Geraniol 8-hydroxylase OS=Catharanthus roseus OX=4058 GN=CYP76B6 PE=1 SV=1	Q	Secondary metabolites biosynthesis, transport and catabolism	unnamed protein product [Prunus armeniaca]
PaF106G0800032487.01	182	168	108	2628	2565	3214	0.93168	1.02087	0.63051	15.4305	15.8986	17.1638	6.75962e-188	4.11077	up	[R]	General function prediction only	Biological Process: signal transduction (GO:0007165);; Molecular Function: ADP binding (GO:0043531);;	K00695|2.4e-101|mtr:MTR_6g478030|K00695 sucrose synthase [EC:2.4.1.13] | (RefSeq) sucrose synthase	Starch and sucrose metabolism (ko00500)	--	--	TIR domain	Disease resistance protein Roq1 OS=Nicotiana benthamiana OX=4100 GN=ROQ1 PE=1 SV=1	S	Function unknown	PREDICTED: TMV resistance protein N-like isoform X2 [Prunus mume]
PaF106G0800031731.01	78	39	29	118	129	81	1.26643	0.756069	0.484512	2.09197	2.4499	1.30788	0.00257371	1.00956	up	[HR]	Coenzyme transport and metabolism;; General function prediction only	Biological Process: sucrose metabolic process (GO:0005985);; Molecular Function: sucrose synthase activity (GO:0016157);; Molecular Function: sucrose-phosphate synthase activity (GO:0046524);;	K00696|4.2e-55|pavi:110746034|K00696 sucrose-phosphate synthase [EC:2.4.1.14] | (RefSeq) probable sucrose-phosphate synthase 2	Starch and sucrose metabolism (ko00500)	[M]	Cell wall/membrane/envelope biogenesis	--	Probable sucrose-phosphate synthase 1 OS=Oryza sativa subsp. indica OX=39946 GN=SPS1 PE=2 SV=2	M	Cell wall/membrane/envelope biogenesis	unnamed protein product [Prunus armeniaca]
PaF106G0700027537.01	119	91	112	473	489	763	1.67539	1.53054	1.6254	7.29138	8.0923	10.8338	2.93524e-40	2.34393	up	[I]	Lipid transport and metabolism	Biological Process: lipid metabolic process (GO:0006629);;	K16818|3.4e-06|dct:110113683|K16818 phospholipase A1 [EC:3.1.1.32] | (RefSeq) phospholipase A(1) DAD1, chloroplastic-like	Glycerophospholipid metabolism (ko00564);; alpha-Linolenic acid metabolism (ko00592)	[I]	Lipid transport and metabolism	Lipase (class 3)	Triacylglycerol lipase OBL1 OS=Nicotiana tabacum OX=4097 GN=OBL1 PE=1 SV=1	I	Lipid transport and metabolism	uncharacterized protein LOC117635169 [Prunus dulcis]
PaF106G0300011497.01	54	59	55	161	181	191	1.52195	1.99209	1.58236	4.94696	5.95821	5.41115	2.06502e-11	1.56406	up	--	--	Molecular Function: electron carrier activity (GO:0009055);; Cellular Component: integral component of membrane (GO:0016021);; Cellular Component: anchored component of plasma membrane (GO:0046658);;	--	--	--	--	Plastocyanin-like domain	Mavicyanin OS=Cucurbita pepo OX=3663 PE=1 SV=1	S	Function unknown	unnamed protein product [Prunus armeniaca]
PaF106G0200010362.01	4637	4023	4133	1698	1755	2026	54.5466	56.6289	50.1533	21.7341	24.087	23.8521	1.51391e-46	-1.12401	down	[G]	Carbohydrate transport and metabolism	Cellular Component: phosphopyruvate hydratase complex (GO:0000015);; Molecular Function: magnesium ion binding (GO:0000287);; Molecular Function: phosphopyruvate hydratase activity (GO:0004634);; Biological Process: glycolytic process (GO:0006096);; Biological Process: regulation of vacuole fusion, non-autophagic (GO:0032889);;	K01689|5.7e-253|pmum:103333317|K01689 enolase [EC:4.2.1.11] | (RefSeq) enolase	Glycolysis / Gluconeogenesis (ko00010);; Carbon metabolism (ko01200);; Biosynthesis of amino acids (ko01230);; RNA degradation (ko03018)	[G]	Carbohydrate transport and metabolism	Enolase, C-terminal TIM barrel domain	Enolase OS=Oryza sativa subsp. japonica OX=39947 GN=ENO1 PE=1 SV=2	G	Carbohydrate transport and metabolism	PREDICTED: enolase [Prunus mume]
PaF106G0800029287.01	1676	1488	1555	702	699	658	10.8465	11.5209	10.3747	4.94458	5.27629	4.25934	4.25042e-20	-1.07365	down	--	--	Molecular Function: molecular_function (GO:0003674);; Molecular Function: nucleic acid binding (GO:0003676);; Molecular Function: RNA binding (GO:0003723);; Molecular Function: catalytic activity (GO:0003824);; Molecular Function: nuclease activity (GO:0004518);; Molecular Function: endonuclease activity (GO:0004519);; Molecular Function: binding (GO:0005488);; Cellular Component: cellular_compon…	--	--	[R]	General function prediction only	PPR repeat family	Pentatricopeptide repeat-containing protein At5g14820, mitochondrial OS=Arabidopsis thaliana OX=3702 GN=At5g14820 PE=2 SV=1	L	Replication, recombination and repair	unnamed protein product [Prunus armeniaca]
PaF106G0300011888.01	148	186	175	37	29	42	2.60276	3.9257	3.17961	0.710752	0.59018	0.730283	9.26975e-13	-1.86563	down	--	--	Cellular Component: nucleus (GO:0005634);; Cellular Component: host cell nucleus (GO:0042025);; Biological Process: regulation of cell cycle (GO:0051726);;	K18812|1.9e-170|pmum:103329497|K18812 cyclin D6, plant | (RefSeq) putative cyclin-D6-1	--	[D]	Cell cycle control, cell division, chromosome partitioning	Cyclin, N-terminal domain	Putative cyclin-D6-1 OS=Arabidopsis thaliana OX=3702 GN=CYCD6-1 PE=3 SV=1	D	Cell cycle control, cell division, chromosome partitioning	unnamed protein product [Prunus armeniaca]
PaF106G0100002227.01	140	163	198	408	386	432	2.68425	3.82189	3.97469	8.65515	10.2645	9.98206	2.43166e-12	1.28708	up	--	--	Cellular Component: Golgi membrane (GO:0000139);; Biological Process: pectin biosynthetic process (GO:0045489);; Molecular Function: polygalacturonate 4-alpha-galacturonosyltransferase activity (GO:0047262);; Biological Process: cell wall organization (GO:0071555);;	K13648|3.4e-28|pmum:103331935|K13648 alpha-1,4-galacturonosyltransferase [EC:2.4.1.43] | (RefSeq) polygalacturonate 4-alpha-galacturonosyltransferase isoform X1	Amino sugar and nucleotide sugar metabolism (ko00520)	--	--	--	Polygalacturonate 4-alpha-galacturonosyltransferase OS=Arabidopsis thaliana OX=3702 GN=GAUT1 PE=1 SV=1	G	Carbohydrate transport and metabolism	unnamed protein product [Prunus armeniaca]
PaF106G0800030461.01	162	216	187	2321	2143	2971	1.15465	1.76331	1.16897	14.9011	14.2372	16.7217	2.97412e-154	3.64292	up	[R]	General function prediction only	Biological Process: signal transduction (GO:0007165);; Molecular Function: ADP binding (GO:0043531);;	K00695|7.0e-102|mtr:MTR_6g478030|K00695 sucrose synthase [EC:2.4.1.13] | (RefSeq) sucrose synthase	Starch and sucrose metabolism (ko00500)	--	--	TIR domain	TMV resistance protein N OS=Nicotiana glutinosa OX=35889 GN=N PE=1 SV=1	S	Function unknown	PREDICTED: TMV resistance protein N-like [Prunus mume]
PaF106G0400014870.01	50	60	73	6	0	13	1.08514	1.52977	1.67165	0.12164	0	0.263918	1.56942e-06	-1.83136	down	--	--	Molecular Function: DNA binding (GO:0003677);; Molecular Function: DNA topoisomerase type I activity (GO:0003917);; Molecular Function: protein kinase activity (GO:0004672);; Molecular Function: ATP binding (GO:0005524);; Biological Process: DNA topological change (GO:0006265);; Molecular Function: zinc ion binding (GO:0008270);;	K03165|1.4e-96|pavi:110754242|K03165 DNA topoisomerase III [EC:5.6.2.1] | (RefSeq) DNA topoisomerase 3-alpha isoform X1	Homologous recombination (ko03440)	[L]	Replication, recombination and repair	GRF zinc finger	DNA topoisomerase 3-alpha OS=Arabidopsis thaliana OX=3702 GN=TOP3A PE=1 SV=1	L	Replication, recombination and repair	unnamed protein product [Prunus armeniaca]
PaF106G0500018795.01	1114	1234	962	477	349	679	6.65968	8.83381	5.9367	3.10077	2.43476	4.06581	1.3817e-08	-1.02	down	[N]	Cell motility	Cellular Component: integral component of membrane (GO:0016021);; Molecular Function: cellulose synthase (UDP-forming) activity (GO:0016760);; Biological Process: cellulose biosynthetic process (GO:0030244);; Biological Process: cell wall organization (GO:0071555);;	K20924|0.0e+00|pmum:103336832|K20924 cellulose synthase-like protein [EC:2.4.1.-] | (RefSeq) cellulose synthase-like protein D3	--	--	--	Cellulose synthase	Cellulose synthase-like protein D3 OS=Arabidopsis thaliana OX=3702 GN=CSLD3 PE=1 SV=1	G	Carbohydrate transport and metabolism	unnamed protein product [Prunus armeniaca]
PaF106G0100004788.01	1442	1459	1316	614	514	691	9.23306	11.1617	8.68901	4.27564	3.82667	4.42957	9.71128e-20	-1.10636	down	[E]	Amino acid transport and metabolism	Molecular Function: aminopeptidase activity (GO:0004177);; Molecular Function: metallopeptidase activity (GO:0008237);; Molecular Function: zinc ion binding (GO:0008270);;	K08776|0.0e+00|pavi:110765102|K08776 puromycin-sensitive aminopeptidase [EC:3.4.11.-] | (RefSeq) aminopeptidase M1-like	--	[EO]	Amino acid transport and metabolism;; Posttranslational modification, protein turnover, chaperones	ERAP1-like C-terminal domain	Aminopeptidase M1 OS=Arabidopsis thaliana OX=3702 GN=APM1 PE=1 SV=1	--	--	unnamed protein product [Prunus armeniaca]
PaF106G0100001855.01	97	41	56	135	146	194	0.470776	0.239989	0.278866	0.719705	0.834661	0.949647	1.19471e-05	1.19514	up	--	--	Biological Process: defense response (GO:0006952);; Molecular Function: ADP binding (GO:0043531);;	K15078|7.1e-132|tcc:18614561|K15078 structure-specific endonuclease subunit SLX1 [EC:3.6.1.-] | (RefSeq) putative disease resistance protein RGA3	--	[T]	Signal transduction mechanisms	NB-ARC domain	Putative disease resistance protein RGA3 OS=Solanum bulbocastanum OX=147425 GN=RGA3 PE=2 SV=2	T	Signal transduction mechanisms	PREDICTED: putative disease resistance protein RGA3 [Prunus mume]
PaF106G0100006520.01	301	217	262	671	607	764	5.338	4.57768	4.9401	14.042	13.6057	14.497	1.37996e-27	1.43123	up	--	--	Biological Process: signal transduction (GO:0007165);; Molecular Function: ADP binding (GO:0043531);;	--	--	--	--	Leucine Rich repeats (2 copies)	--	T	Signal transduction mechanisms	TMV resistance protein N-like [Prunus avium]
PaF106G0600024841.01	450	438	531	1135	988	1144	4.57845	5.32982	5.56361	12.5695	11.7248	11.6466	2.89483e-23	1.25154	up	[O]	Posttranslational modification, protein turnover, chaperones	Biological Process: reproduction (GO:0000003);; Biological Process: cell morphogenesis (GO:0000902);; Biological Process: cell morphogenesis involved in differentiation (GO:0000904);; Biological Process: developmental process involved in reproduction (GO:0003006);; Molecular Function: molecular_function (GO:0003674);; Molecular Function: catalytic activity (GO:0003824);; Cellular Component: cellu…	K03686|2.3e-16|ini:109164591|K03686 molecular chaperone DnaJ | (RefSeq) chaperone protein DnaJ	--	[O]	Posttranslational modification, protein turnover, chaperones	DnaJ domain	DnaJ protein ERDJ3A OS=Arabidopsis thaliana OX=3702 GN=ERDJ3A PE=1 SV=1	O	Posttranslational modification, protein turnover, chaperones	unnamed protein product [Prunus armeniaca]
PaF106G0800031390.01	3	0	0	112	122	137	0.078899	0	0	4.4458	5.20671	5.01953	3.20611e-33	4.03282	up	--	--	Biological Process: dolichol biosynthetic process (GO:0019408);; Cellular Component: dehydrodolichyl diphosphate synthase complex (GO:1904423);;	K11778|1.4e-22|pmum:103335624|K11778 ditrans,polycis-polyprenyl diphosphate synthase [EC:2.5.1.87] | (RefSeq) dehydrodolichyl diphosphate syntase complex subunit NUS1-like	Terpenoid backbone biosynthesis (ko00900)	--	--	--	--	I	Lipid transport and metabolism	Undecaprenyl pyrophosphate synthetase family protein [Prunus dulcis]
PaF106G0300013292.01	575	312	508	196	124	253	7.1016	4.60086	6.4673	2.62939	1.78477	3.12195	7.18508e-07	-1.09137	down	--	--	Biological Process: lipid metabolic process (GO:0006629);; Molecular Function: phosphatidylcholine 1-acylhydrolase activity (GO:0008970);;	K16818|9.2e-41|egr:104446339|K16818 phospholipase A1 [EC:3.1.1.32] | (RefSeq) phospholipase A(1) DAD1, chloroplastic	Glycerophospholipid metabolism (ko00564);; alpha-Linolenic acid metabolism (ko00592)	[I]	Lipid transport and metabolism	Lipase (class 3)	Phospholipase A1-IIdelta OS=Arabidopsis thaliana OX=3702 GN=At2g42690 PE=1 SV=1	I	Lipid transport and metabolism	unnamed protein product [Prunus armeniaca]
PaF106G0200007099.01	178	161	161	35	33	70	3.22235	3.49308	2.99575	0.687818	0.683635	1.26355	6.93139e-09	-1.54279	down	--	--	Molecular Function: ADP binding (GO:0043531);;	K13459|1.1e-16|vvi:104880792|K13459 disease resistance protein RPS2 | (RefSeq) probable disease resistance protein At4g27220	Plant-pathogen interaction (ko04626)	--	--	--	--	--	--	unnamed protein product [Prunus armeniaca]
PaF106G0100001269.01	0	0	0	61	93	47	0	0	0	4.18646	6.91111	2.96027	2.05108e-17	3.14365	up	--	--	Biological Process: response to acid chemical (GO:0001101);; Molecular Function: molecular_function (GO:0003674);; Molecular Function: catalytic activity (GO:0003824);; Molecular Function: thiol-dependent ubiquitin-specific protease activity (GO:0004843);; Cellular Component: cellular_component (GO:0005575);; Cellular Component: intracellular (GO:0005622);; Cellular Component: cell (GO:0005623);;…	--	--	[DR]	Cell cycle control, cell division, chromosome partitioning;; General function prediction only	--	--	D	Cell cycle control, cell division, chromosome partitioning	MATH domain and coiled-coil domain-containing protein At3g58220-like [Prunus avium]
PaF106G0100005920.01	1853	1851	1896	3673	4136	3993	22.0363	27.939	23.9216	49.3355	60.3524	49.29	1.98897e-26	1.14011	up	--	--	Molecular Function: protein binding (GO:0005515);;	K12880|8.9e-07|nau:109212797|K12880 THO complex subunit 3 | (RefSeq) THO complex subunit 3	RNA transport (ko03013);; Spliceosome (ko03040)	--	--	Anaphase-promoting complex subunit 4 WD40 domain	--	S	Function unknown	uncharacterized WD repeat-containing protein C2A9.03-like isoform X4 [Prunus avium]
PaF106G0200010830.01	38	22	11	109	118	124	0.700279	0.559973	0.192777	2.19621	2.57034	2.31357	2.8242e-09	1.87532	up	--	--	Cellular Component: endoplasmic reticulum membrane (GO:0005789);; Biological Process: protein retention in ER lumen (GO:0006621);; Biological Process: protein transport (GO:0015031);; Cellular Component: integral component of membrane (GO:0016021);; Molecular Function: ER retention sequence binding (GO:0046923);;	K10949|1.0e-70|pper:18787451|K10949 ER lumen protein retaining receptor | (RefSeq) ER lumen protein-retaining receptor	--	[U]	Intracellular trafficking, secretion, and vesicular transport	ER lumen protein retaining receptor	ER lumen protein-retaining receptor OS=Petunia hybrida OX=4102 GN=ERD2 PE=2 SV=1	U	Intracellular trafficking, secretion, and vesicular transport	unnamed protein product [Prunus armeniaca]
PaF106G0100005824.01	2070	1571	1876	4433	4269	5020	26.3068	22.2434	22.9315	57.1494	58.9266	59.4617	5.51274e-75	1.39133	up	[G]	Carbohydrate transport and metabolism	Molecular Function: UDP-glycosyltransferase activity (GO:0008194);; Cellular Component: intracellular membrane-bounded organelle (GO:0043231);; Molecular Function: quercetin 3-O-glucosyltransferase activity (GO:0080043);; Molecular Function: quercetin 7-O-glucosyltransferase activity (GO:0080044);;	K13691|3.1e-150|jre:108988962|K13691 pathogen-inducible salicylic acid glucosyltransferase [EC:2.4.1.-] | (RefSeq) UDP-glycosyltransferase 74F2-like	--	[GC]	Carbohydrate transport and metabolism;; Energy production and conversion	UDP-glucoronosyl and UDP-glucosyl transferase	UDP-glycosyltransferase 74E2 OS=Arabidopsis thaliana OX=3702 GN=UGT74E2 PE=1 SV=1	--	--	unnamed protein product [Prunus armeniaca]
PaF106G0400015256.01	175	173	185	0	0	0	4.85763	5.72767	5.27803	0	0	0	1.42915e-44	-4.63631	down	[Q]	Secondary metabolites biosynthesis, transport and catabolism	Molecular Function: oxidoreductase activity (GO:0016491);; Molecular Function: metal ion binding (GO:0046872);;	K05278|4.0e-30|psom:113346476|K05278 flavonol synthase [EC:1.14.20.6] | (RefSeq) flavonol synthase/flavanone 3-hydroxylase-like	Flavonoid biosynthesis (ko00941)	[QR]	Secondary metabolites biosynthesis, transport and catabolism;; General function prediction only	2OG-Fe(II) oxygenase superfamily	Probable 2-oxoglutarate-dependent dioxygenase At5g05600 OS=Arabidopsis thaliana OX=3702 GN=At5g05600 PE=2 SV=1	Q	Secondary metabolites biosynthesis, transport and catabolism	unnamed protein product [Prunus armeniaca]
PaF106G0400015188.01	6583	6010	6665	3237	2653	2961	88.1177	96.2736	92.0292	47.1471	41.4484	39.6797	3.64079e-25	-1.01321	down	--	--	Cellular Component: integral component of membrane (GO:0016021);;	K00858|1.8e-18|egr:104421503|K00858 NAD+ kinase [EC:2.7.1.23] | (RefSeq) putative NAD kinase 3 isoform X1	Nicotinate and nicotinamide metabolism (ko00760)	--	--	Protein RETICULATA-related	Protein RETICULATA-RELATED 4, chloroplastic OS=Arabidopsis thaliana OX=3702 GN=RER4 PE=2 SV=1	S	Function unknown	unnamed protein product [Prunus armeniaca]
Prunus_sibirica_newGene_1126	69	54	87	136	143	158	1.84742	1.7922	2.41959	4.21272	4.76708	4.47688	4.12688e-05	1.0195	up	--	--	Molecular Function: protein serine/threonine kinase activity (GO:0004674);; Molecular Function: ATP binding (GO:0005524);; Cellular Component: integral component of membrane (GO:0016021);;	--	--	--	--	--	--	T	Signal transduction mechanisms	unnamed protein product [Prunus armeniaca]
PaF106G0100005795.01	1024	676	1027	341	244	329	17.6346	13.9195	18.2354	6.39105	4.90252	5.6651	4.10999e-19	-1.41167	down	[Q]	Secondary metabolites biosynthesis, transport and catabolism	Molecular Function: metal ion binding (GO:0046872);; Molecular Function: dioxygenase activity (GO:0051213);;	K05278|5.4e-192|pmum:103332906|K05278 flavonol synthase [EC:1.14.20.6] | (RefSeq) flavonol synthase/flavanone 3-hydroxylase-like	Flavonoid biosynthesis (ko00941)	[QR]	Secondary metabolites biosynthesis, transport and catabolism;; General function prediction only	2OG-Fe(II) oxygenase superfamily	Flavonol synthase/flavanone 3-hydroxylase OS=Citrus unshiu OX=55188 GN=FLS PE=1 SV=1	Q	Secondary metabolites biosynthesis, transport and catabolism	unnamed protein product [Prunus armeniaca]
PaF106G0800032652.01	2	0	0	383	491	455	0.008795	0	0	2.10983	2.90043	2.30391	4.10651e-86	5.84896	up	[R]	General function prediction only	Biological Process: signal transduction (GO:0007165);; Molecular Function: ADP binding (GO:0043531);;	K00695|2.5e-129|mtr:MTR_6g478030|K00695 sucrose synthase [EC:2.4.1.13] | (RefSeq) sucrose synthase	Starch and sucrose metabolism (ko00500)	--	--	TIR domain	TMV resistance protein N OS=Nicotiana glutinosa OX=35889 GN=N PE=1 SV=1	S	Function unknown	PREDICTED: TMV resistance protein N-like [Prunus mume]
PaF106G0500019051.01	69	66	66	10	23	13	1.41831	1.61852	1.38886	0.212707	0.544882	0.24763	3.32001e-05	-1.45369	down	--	--	Cellular Component: extracellular region (GO:0005576);;	K20628|3.9e-08|ppp:112294328|K20628 expansin | (RefSeq) expansin-B3-like	--	--	--	Expansin C-terminal domain	Expansin-like B1 OS=Oryza sativa subsp. japonica OX=39947 GN=EXLB1 PE=2 SV=2	S	Function unknown	expansin-like B1 isoform X1 [Prunus dulcis]
PaF106G0400016074.01	176	106	141	8	8	10	5.16665	3.71819	4.27488	0.248192	0.261238	0.276998	1.4423e-23	-3.02773	down	--	--	Molecular Function: DNA binding (GO:0003677);; Molecular Function: transcription factor activity, sequence-specific DNA binding (GO:0003700);; Cellular Component: nucleus (GO:0005634);; Biological Process: flower development (GO:0009908);; Cellular Component: host cell nucleus (GO:0042025);; Molecular Function: metal ion binding (GO:0046872);;	K20641|4.9e-13|cvr:CHLNCDRAFT_59250|K20641 Rho GTPase-activating protein 20 | (RefSeq) hypothetical protein	--	--	--	SBP domain	Squamosa promoter-binding-like protein 5 OS=Arabidopsis thaliana OX=3702 GN=SPL5 PE=2 SV=1	K	Transcription	PREDICTED: squamosa promoter-binding-like protein 3 [Prunus mume]
PaF106G0400016240.01	672	379	414	100	129	216	11.7968	7.96547	7.49327	1.89575	2.64383	3.78563	1.04169e-10	-1.47415	down	--	--	Cellular Component: cellular_component (GO:0005575);; Cellular Component: intracellular (GO:0005622);; Cellular Component: cell (GO:0005623);; Cellular Component: cytoplasm (GO:0005737);; Cellular Component: endosome (GO:0005768);; Cellular Component: Golgi apparatus (GO:0005794);; Cellular Component: trans-Golgi network (GO:0005802);; Biological Process: response to stress (GO:0006950);; Biologi…	K12472|1.0e-25|bvg:104885038|K12472 epidermal growth factor receptor substrate 15 | (RefSeq) filaggrin-like	Endocytosis (ko04144)	--	--	BURP domain	BURP domain protein RD22 OS=Arabidopsis thaliana OX=3702 GN=RD22 PE=2 SV=1	S	Function unknown	PREDICTED: BURP domain protein RD22-like [Prunus mume]
PaF106G0600023944.01	5	0	7	82	80	126	0.028892	0	0.051009	0.638133	0.664909	0.905686	6.94196e-19	3.04478	up	[R]	General function prediction only	Biological Process: defense response (GO:0006952);; Molecular Function: ADP binding (GO:0043531);;	K13457|0.0e+00|pmum:103334422|K13457 disease resistance protein RPM1 | (RefSeq) disease resistance protein RPM1-like	Plant-pathogen interaction (ko04626)	[T]	Signal transduction mechanisms	NB-ARC domain	Disease resistance protein RPM1 OS=Arabidopsis thaliana OX=3702 GN=RPM1 PE=1 SV=1	T	Signal transduction mechanisms	PREDICTED: disease resistance protein RPM1-like [Prunus mume]
PaF106G0800032256.01	3427	3303	4332	1082	969	1462	39.9125	46.2686	52.1614	14.0174	13.4865	17.4973	1.88535e-35	-1.53705	down	[DPM]	Cell cycle control, cell division, chromosome partitioning;; Inorganic ion transport and metabolism;; Cell wall/membrane/envelope biogenesis	Molecular Function: ferroxidase activity (GO:0004322);; Molecular Function: copper ion binding (GO:0005507);; Cellular Component: plasma membrane (GO:0005886);; Biological Process: iron ion transport (GO:0006826);; Biological Process: lignin catabolic process (GO:0046274);; Cellular Component: apoplast (GO:0048046);; Molecular Function: hydroquinone:oxygen oxidoreductase activity (GO:0052716);; B…	K05909|0.0e+00|pmum:103336352|K05909 laccase [EC:1.10.3.2] | (RefSeq) laccase-15-like	--	[Q]	Secondary metabolites biosynthesis, transport and catabolism	Multicopper oxidase	Putative laccase-9 OS=Oryza sativa subsp. japonica OX=39947 GN=LAC9 PE=3 SV=1	Q	Secondary metabolites biosynthesis, transport and catabolism	unnamed protein product [Prunus armeniaca]
PaF106G0400016870.01	178	210	222	593	469	534	0.980953	1.38324	1.2633	3.56072	3.02211	2.94971	2.69053e-15	1.38551	up	[T]	Signal transduction mechanisms	Molecular Function: protein kinase activity (GO:0004672);; Molecular Function: ATP binding (GO:0005524);; Cellular Component: integral component of membrane (GO:0016021);;	K00924|3.4e-66|csat:104702328|K00924 kinase [EC:2.7.1.-] | (RefSeq) receptor protein kinase CLAVATA1-like	--	--	--	Protein kinase domain	LRR receptor-like serine/threonine-protein kinase GSO1 OS=Arabidopsis thaliana OX=3702 GN=GSO1 PE=1 SV=1	T	Signal transduction mechanisms	LRR receptor-like serine/threonine-protein kinase GSO1 [Prunus yedoensis var. nudiflora]
PaF106G0500018589.01	7	3	15	203	210	313	0.106019	0.047821	0.251282	3.67388	4.07475	5.2049	1.65897e-42	3.90667	up	--	--	Cellular Component: integral component of membrane (GO:0016021);;	K01537|1.0e-45|pavi:110773092|K01537 P-type Ca2+ transporter type 2C [EC:7.2.2.10] | (RefSeq) putative calcium-transporting ATPase 11, plasma membrane-type isoform X1	--	--	--	--	--	--	--	PREDICTED: uncharacterized protein LOC103323471 isoform X1 [Prunus mume]
PaF106G0800030686.01	52	11	54	133	91	159	0.979175	0.240911	1.0526	2.75576	2.01916	3.03883	7.31073e-05	1.35566	up	--	--	Molecular Function: channel activity (GO:0015267);; Cellular Component: integral component of membrane (GO:0016021);;	K09866|1.4e-107|pmum:103334976|K09866 aquaporin-4 | (RefSeq) aquaporin-like	--	[G]	Carbohydrate transport and metabolism	Major intrinsic protein	Probable aquaporin PIP2-7 OS=Oryza sativa subsp. japonica OX=39947 GN=PIP2-7 PE=2 SV=2	G	Carbohydrate transport and metabolism	plasma membrane intrinsic protein 1A, partial [Prunus dulcis]
PaF106G0200010254.01	172	120	131	45	49	63	2.25627	1.87213	1.76825	0.631856	0.747967	0.823093	3.82557e-06	-1.17641	down	[G]	Carbohydrate transport and metabolism	Cellular Component: integral component of membrane (GO:0016021);; Molecular Function: transmembrane transporter activity (GO:0022857);;	K24193|1.0e-282|pper:18785323|K24193 MFS transporter, SP family, sugar:H+ symporter | (RefSeq) hexose carrier protein HEX6	--	[R]	General function prediction only	Sugar (and other) transporter	Hexose carrier protein HEX6 OS=Ricinus communis OX=3988 GN=HEX6 PE=2 SV=1	U	Intracellular trafficking, secretion, and vesicular transport	unnamed protein product [Prunus armeniaca]
PaF106G0700026837.01	1213	933	1080	2566	2456	2940	16.0005	14.3134	14.6199	38.7248	40.5387	40.4706	1.45126e-62	1.37608	up	[GI]	Carbohydrate transport and metabolism;; Lipid transport and metabolism	Cellular Component: extracellular region (GO:0005576);; Cellular Component: cell wall (GO:0005618);; Molecular Function: pectinesterase activity (GO:0030599);; Biological Process: cell wall modification (GO:0042545);; Molecular Function: aspartyl esterase activity (GO:0045330);; Biological Process: pectin catabolic process (GO:0045490);; Molecular Function: pectinesterase inhibitor activity (GO:0…	K01051|6.8e-298|pmum:103340502|K01051 pectinesterase [EC:3.1.1.11] | (RefSeq) pectinesterase/pectinesterase inhibitor PPE8B	Pentose and glucuronate interconversions (ko00040)	--	--	Pectinesterase	Pectinesterase/pectinesterase inhibitor PPE8B OS=Prunus persica OX=3760 PE=2 SV=1	G	Carbohydrate transport and metabolism	unnamed protein product [Prunus armeniaca]
PaF106G0500021260.01	656	442	579	208	223	162	5.41378	4.36924	4.93615	1.87022	2.1463	1.34331	1.2316e-11	-1.29081	down	[P]	Inorganic ion transport and metabolism	Molecular Function: potassium ion transmembrane transporter activity (GO:0015079);; Cellular Component: integral component of membrane (GO:0016021);;	K03549|4.6e-161|pmum:103338808|K03549 KUP system potassium uptake protein | (RefSeq) potassium transporter 2	--	--	--	K+ potassium transporter	Potassium transporter 10 OS=Oryza sativa subsp. japonica OX=39947 GN=HAK10 PE=2 SV=1	O	Posttranslational modification, protein turnover, chaperones	unnamed protein product [Prunus armeniaca]
PaF106G0400016522.01	25	18	28	44	51	111	0.291108	0.243505	0.338029	0.561342	0.705721	1.32285	0.000948392	1.1655	up	--	--	Cellular Component: membrane (GO:0016020);; Cellular Component: integral component of membrane (GO:0016021);;	K15503|3.5e-29|hbr:110673220|K15503 serine/threonine-protein phosphatase 6 regulatory ankyrin repeat subunit B | (RefSeq) uncharacterized protein LOC110673220	--	[R]	General function prediction only	Ankyrin repeats (3 copies)	Protein ACCELERATED CELL DEATH 6 OS=Arabidopsis thaliana OX=3702 GN=ACD6 PE=1 SV=1	S	Function unknown	ankyrin repeat-containing protein At5g02620 [Prunus persica]
Prunus_sibirica_newGene_1339	0	0	0	969	897	1172	0	0	0	8.55464	8.49315	9.49914	1.82747e-143	7.13262	up	--	--	Biological Process: signal transduction (GO:0007165);; Molecular Function: ADP binding (GO:0043531);;	--	--	--	--	--	--	S	Function unknown	PREDICTED: disease resistance protein RPS6-like [Prunus mume]
PaF106G0200008766.01	670	488	624	1259	1309	1355	14.5616	12.6897	13.997	29.79	33.2308	29.5066	2.09715e-26	1.20743	up	[I]	Lipid transport and metabolism	Molecular Function: hydrolase activity (GO:0016787);;	K22097|1.3e-70|psom:113323289|K22097 3-O-acetylpapaveroxine carboxylesterase [EC:3.1.1.105] | (RefSeq) carboxylesterase 1-like	Isoquinoline alkaloid biosynthesis (ko00950)	[V]	Defense mechanisms	alpha/beta hydrolase fold	Probable carboxylesterase 9 OS=Arabidopsis thaliana OX=3702 GN=CXE9 PE=2 SV=1	V	Defense mechanisms	unnamed protein product [Prunus armeniaca]
PaF106G0600024431.01	6424	5630	5287	2198	2199	3316	57.8199	60.6948	49.0581	21.5318	23.0767	29.8452	1.25727e-21	-1.07199	down	[T]	Signal transduction mechanisms	Biological Process: phosphorelay signal transduction system (GO:0000160);; Cellular Component: nucleus (GO:0005634);;	K12129|0.0e+00|pmum:103340410|K12129 pseudo-response regulator 7 | (RefSeq) two-component response regulator-like APRR7 isoform X1	Circadian rhythm - plant (ko04712)	[K]	Transcription	Response regulator receiver domain	Two-component response regulator-like APRR7 OS=Arabidopsis thaliana OX=3702 GN=APRR7 PE=1 SV=1	K	Transcription	unnamed protein product [Prunus armeniaca]
PaF106G0100001851.01	1590	1371	1560	72	87	127	6.96564	7.18706	7.0503	0.3386	0.441559	0.555752	3.28977e-155	-3.7493	down	--	--	Biological Process: defense response (GO:0006952);; Molecular Function: ADP binding (GO:0043531);;	K15078|2.2e-117|tcc:18614561|K15078 structure-specific endonuclease subunit SLX1 [EC:3.6.1.-] | (RefSeq) putative disease resistance protein RGA3	--	[T]	Signal transduction mechanisms	NB-ARC domain	Putative disease resistance protein RGA3 OS=Solanum bulbocastanum OX=147425 GN=RGA3 PE=2 SV=2	T	Signal transduction mechanisms	disease resistance protein RGA2 [Prunus persica]
PaF106G0100006596.01	9523	6960	7662	2475	2101	3209	170.243	148.908	141.297	48.1458	43.8313	57.4306	1.51647e-51	-1.52114	down	--	--	Molecular Function: nutrient reservoir activity (GO:0045735);;	K17338|2.6e-11|ats:109751343|K17338 receptor expression-enhancing protein 1/2/3/4 | (RefSeq) LOC109751343; putative HVA22-like protein g isoform X1	--	--	--	Cupin	--	S	Function unknown	PREDICTED: glutelin type-A 2-like [Prunus mume]
PaF106G0300013170.01	0	4	6	64	48	73	0	0.117631	0.130848	1.74169	1.39358	1.81654	1.73896e-11	2.46697	up	--	--	Molecular Function: calcium ion binding (GO:0005509);; Cellular Component: integral component of membrane (GO:0016021);;	K06268|1.9e-18|pavi:110765049|K06268 serine/threonine-protein phosphatase 2B regulatory subunit | (RefSeq) calcineurin B-like protein 10	--	[T]	Signal transduction mechanisms	--	Calcineurin B-like protein 9 OS=Oryza sativa subsp. japonica OX=39947 GN=CBL9 PE=2 SV=2	T	Signal transduction mechanisms	unnamed protein product [Prunus armeniaca]
PaF106G0700027837.01	77	79	107	9	6	6	1.01024	1.24051	1.4408	0.116292	0.083256	0.074674	9.25323e-14	-2.50404	down	[O]	Posttranslational modification, protein turnover, chaperones	Molecular Function: ATP binding (GO:0005524);; Cellular Component: cytoplasm (GO:0005737);; Biological Process: response to unfolded protein (GO:0006986);; Molecular Function: ATPase activity (GO:0016887);; Molecular Function: heat shock protein binding (GO:0031072);; Biological Process: cellular response to unfolded protein (GO:0034620);; Biological Process: protein refolding (GO:0042026);; Mole…	K03283|5.5e-276|pmum:103341785|K03283 heat shock 70kDa protein 1/2/6/8 | (RefSeq) heat shock cognate 70 kDa protein-like	Spliceosome (ko03040);; Protein processing in endoplasmic reticulum (ko04141);; Endocytosis (ko04144)	[O]	Posttranslational modification, protein turnover, chaperones	Hsp70 protein	Heat shock cognate 70 kDa protein OS=Petunia hybrida OX=4102 GN=HSP70 PE=2 SV=1	O	Posttranslational modification, protein turnover, chaperones	PREDICTED: heat shock cognate 70 kDa protein-like [Prunus mume]
PaF106G0300012314.01	91	50	34	123	171	204	1.14978	0.750265	0.437414	1.70513	2.5409	2.60318	6.60228e-06	1.3273	up	[G]	Carbohydrate transport and metabolism	Molecular Function: UDP-glycosyltransferase activity (GO:0008194);; Cellular Component: intracellular membrane-bounded organelle (GO:0043231);; Molecular Function: quercetin 3-O-glucosyltransferase activity (GO:0080043);; Molecular Function: quercetin 7-O-glucosyltransferase activity (GO:0080044);;	K22706|2.3e-127|pmum:103319663|K22706 (R)-mandelonitrile beta-glucosyltransferase [EC:2.4.1.354] | (RefSeq) 7-deoxyloganetin glucosyltransferase-like	Cyanoamino acid metabolism (ko00460)	[GC]	Carbohydrate transport and metabolism;; Energy production and conversion	UDP-glucoronosyl and UDP-glucosyl transferase	7-deoxyloganetin glucosyltransferase OS=Gardenia jasminoides OX=114476 GN=UGT85A24 PE=1 SV=1	--	--	PREDICTED: 7-deoxyloganetin glucosyltransferase-like [Prunus mume]
PaF106G0500020276.01	184	150	222	416	344	473	2.49343	2.43349	3.11727	6.16255	5.45409	6.44459	2.17344e-11	1.16559	up	[QV]	Secondary metabolites biosynthesis, transport and catabolism;; Defense mechanisms	Molecular Function: iron ion binding (GO:0005506);; Molecular Function: oxidoreductase activity, acting on paired donors, with incorporation or reduction of molecular oxygen (GO:0016705);; Molecular Function: heme binding (GO:0020037);;	K20665|2.8e-296|pmum:103338054|K20665 jasmonoyl-L-amino acid 12-hydroxylase [EC:1.14.14.48] | (RefSeq) cytochrome P450 94B3	--	[QI]	Secondary metabolites biosynthesis, transport and catabolism;; Lipid transport and metabolism	Cytochrome P450	Cytochrome P450 94B1 OS=Arabidopsis thaliana OX=3702 GN=CYP94B1 PE=1 SV=1	--	--	unnamed protein product [Prunus armeniaca]
PaF106G0400017605.01	70	106	72	298	217	185	0.989441	1.79773	1.05993	4.61848	3.60404	2.64335	5.74304e-07	1.35451	up	[O]	Posttranslational modification, protein turnover, chaperones	Molecular Function: protein serine/threonine kinase activity (GO:0004674);; Molecular Function: ATP binding (GO:0005524);; Biological Process: signal transduction (GO:0007165);; Cellular Component: integral component of membrane (GO:0016021);;	K07198|9.2e-156|vvi:100258329|K07198 5'-AMP-activated protein kinase, catalytic alpha subunit [EC:2.7.11.11] | (RefSeq) CIPK16; CBL-interacting protein kinase 16	--	[T]	Signal transduction mechanisms	Protein kinase domain	CBL-interacting serine/threonine-protein kinase 12 OS=Arabidopsis thaliana OX=3702 GN=CIPK12 PE=1 SV=1	T	Signal transduction mechanisms	unnamed protein product [Prunus armeniaca]
PaF106G0800030442.01	199	188	160	44	69	62	2.66861	3.01517	2.21032	0.635566	1.06507	0.83007	5.36083e-08	-1.36684	down	[P]	Inorganic ion transport and metabolism	Molecular Function: N,N-dimethylaniline monooxygenase activity (GO:0004499);; Molecular Function: flavin adenine dinucleotide binding (GO:0050660);; Molecular Function: NADP binding (GO:0050661);;	K22324|9.9e-15|csat:104714592|K22324 aliphatic glucosinolate S-oxygenase [EC:1.14.13.237] | (RefSeq) flavin-containing monooxygenase FMO GS-OX2 isoform X1	--	[Q]	Secondary metabolites biosynthesis, transport and catabolism	Flavin-binding monooxygenase-like	Probable flavin-containing monooxygenase 1 OS=Arabidopsis thaliana OX=3702 GN=FMO1 PE=2 SV=1	Q	Secondary metabolites biosynthesis, transport and catabolism	unnamed protein product [Prunus armeniaca]
PaF106G0400015286.01	63	49	61	0	0	0	1.23459	1.14441	1.24641	0	0	0	4.71414e-16	-3.01263	down	--	--	Cellular Component: integral component of membrane (GO:0016021);;	K13466|3.3e-06|vvi:100256083|K13466 EIX receptor 1/2 | (RefSeq) receptor-like protein 12	Plant-pathogen interaction (ko04626)	--	--	Leucine Rich repeats (2 copies)	--	T	Signal transduction mechanisms	PREDICTED: receptor-like protein 2 [Prunus mume]
PaF106G0800031596.01	95	73	69	234	285	293	3.57314	3.26743	2.6646	9.59725	12.5551	11.0822	8.29285e-17	1.71642	up	--	--	Biological Process: response to auxin (GO:0009733);;	K14488|2.1e-69|pmum:103335786|K14488 SAUR family protein | (RefSeq) indole-3-acetic acid-induced protein ARG7-like	Plant hormone signal transduction (ko04075)	--	--	Auxin responsive protein	Indole-3-acetic acid-induced protein ARG7 OS=Vigna radiata var. radiata OX=3916 GN=ARG7 PE=2 SV=1	S	Function unknown	PREDICTED: indole-3-acetic acid-induced protein ARG7-like [Prunus mume]
PaF106G0800030069.01	0	0	0	286	276	277	0	0	0	15.0775	15.581	13.4244	1.71558e-66	5.40478	up	--	--	Cellular Component: extracellular region (GO:0005576);; Biological Process: rejection of self pollen (GO:0060320);;	--	--	--	--	Plant self-incompatibility protein S1	S-protein homolog 74 OS=Arabidopsis thaliana OX=3702 GN=SPH74 PE=2 SV=1	S	Function unknown	unnamed protein product [Prunus armeniaca]
PaF106G0100002932.01	791	667	751	232	335	414	6.05363	6.10693	5.93365	1.93001	2.99442	3.17054	4.6973e-10	-1.03677	down	--	--	Biological Process: phloem development (GO:0010088);;	--	--	--	--	Sieve element occlusion C-terminus	Protein SIEVE ELEMENT OCCLUSION B OS=Arabidopsis thaliana OX=3702 GN=SEOB PE=1 SV=1	S	Function unknown	unnamed protein product [Prunus armeniaca]
PaF106G0600025632.01	150	104	205	33	39	55	4.53633	3.76205	6.4159	1.0783	1.37986	1.66954	1.84799e-07	-1.48047	down	--	--	Biological Process: defense response to bacterium (GO:0042742);; Biological Process: defense response to fungus (GO:0050832);;	--	--	[R]	General function prediction only	Barwin family	Pathogenesis-related protein PR-4B OS=Nicotiana tabacum OX=4097 PE=2 SV=1	S	Function unknown	unnamed protein product [Prunus armeniaca]
PaF106G0200008090.01	54	46	59	188	161	154	0.698606	0.710326	0.776286	2.60772	2.44	1.93443	2.5757e-10	1.55291	up	[M]	Cell wall/membrane/envelope biogenesis	Molecular Function: hydrolase activity, acting on ester bonds (GO:0016788);;	K01114|5.1e-298|pmum:103331281|K01114 phospholipase C [EC:3.1.4.3] | (RefSeq) non-specific phospholipase C3-like isoform X1	Inositol phosphate metabolism (ko00562);; Glycerophospholipid metabolism (ko00564);; Ether lipid metabolism (ko00565)	--	--	Phosphoesterase family	Non-specific phospholipase C3 OS=Arabidopsis thaliana OX=3702 GN=NPC3 PE=2 SV=1	M	Cell wall/membrane/envelope biogenesis	unnamed protein product [Prunus armeniaca]
PaF106G0800031977.01	188	134	212	521	486	706	2.95203	2.37432	2.7162	7.04612	7.05288	8.79466	1.38505e-23	1.67174	up	[R]	General function prediction only	Molecular Function: 5'-3' exoribonuclease activity (GO:0004534);; Molecular Function: 5'-3' exodeoxyribonuclease activity (GO:0035312);;	K07053|5.7e-131|pmum:103335920|K07053 3',5'-nucleoside bisphosphate phosphatase [EC:3.1.3.97] | (RefSeq) 3',5'-nucleoside bisphosphate phosphatase	--	--	--	PHP domain	--	S	Function unknown	uncharacterized protein LOC18766716 [Prunus persica]
PaF106G0800029666.01	1679	1382	1826	561	508	633	24.2527	23.8941	27.2189	8.82297	8.56249	9.15739	1.16107e-37	-1.40189	down	[R]	General function prediction only	Biological Process: lipid catabolic process (GO:0016042);; Molecular Function: hydrolase activity (GO:0016787);;	--	--	[I]	Lipid transport and metabolism	Patatin-like phospholipase	Probable inactive patatin-like protein 9 OS=Arabidopsis thaliana OX=3702 GN=PLP9 PE=2 SV=1	I	Lipid transport and metabolism	unnamed protein product [Prunus armeniaca]
PaF106G0800032310.01	286	285	284	607	564	795	1.42608	1.702	1.46185	3.29699	3.28878	3.97343	2.23805e-18	1.22894	up	[R]	General function prediction only	Biological Process: signal transduction (GO:0007165);; Cellular Component: integral component of membrane (GO:0016021);; Molecular Function: ADP binding (GO:0043531);;	K00695|3.3e-133|mtr:MTR_6g478030|K00695 sucrose synthase [EC:2.4.1.13] | (RefSeq) sucrose synthase	Starch and sucrose metabolism (ko00500)	--	--	TIR domain	TMV resistance protein N OS=Nicotiana glutinosa OX=35889 GN=N PE=1 SV=1	S	Function unknown	TMV resistance protein N-like [Prunus dulcis]
PaF106G0800031748.01	567	500	627	1516	1449	1492	4.61178	4.58804	5.00235	13.6763	13.1673	11.697	1.01738e-35	1.45171	up	[J]	Translation, ribosomal structure and biogenesis	Molecular Function: aminoacyl-tRNA ligase activity (GO:0004812);; Molecular Function: threonine-tRNA ligase activity (GO:0004829);; Molecular Function: ATP binding (GO:0005524);; Cellular Component: mitochondrion (GO:0005739);; Biological Process: tRNA aminoacylation for protein translation (GO:0006418);; Biological Process: threonyl-tRNA aminoacylation (GO:0006435);; Cellular Component: chloropl…	K01868|0.0e+00|pmum:103335890|K01868 threonyl-tRNA synthetase [EC:6.1.1.3] | (RefSeq) threonine--tRNA ligase, mitochondrial 1-like	Aminoacyl-tRNA biosynthesis (ko00970)	[J]	Translation, ribosomal structure and biogenesis	tRNA synthetase class II core domain (G, H, P, S and T)	Threonine--tRNA ligase, mitochondrial 1 OS=Arabidopsis thaliana OX=3702 GN=THRRS PE=1 SV=3	J	Translation, ribosomal structure and biogenesis	unnamed protein product [Prunus armeniaca]
PaF106G0100006463.01	2301	2018	1857	430	365	540	19.2134	20.1922	15.9639	3.92897	3.55713	4.55451	1.57645e-70	-2.07694	down	[G]	Carbohydrate transport and metabolism	Molecular Function: hydrolase activity, hydrolyzing O-glycosyl compounds (GO:0004553);; Molecular Function: xylan 1,4-beta-xylosidase activity (GO:0009044);; Cellular Component: plant-type cell wall (GO:0009505);; Biological Process: arabinan catabolic process (GO:0031222);; Biological Process: xylan catabolic process (GO:0045493);; Molecular Function: alpha-L-arabinofuranosidase activity (GO:004…	K15920|0.0e+00|pmum:103319154|K15920 xylan 1,4-beta-xylosidase [EC:3.2.1.37] | (RefSeq) beta-xylosidase/alpha-L-arabinofuranosidase 2	Amino sugar and nucleotide sugar metabolism (ko00520)	--	--	Glycosyl hydrolase family 3 C-terminal domain	Beta-xylosidase/alpha-L-arabinofuranosidase 2 OS=Medicago sativa subsp. varia OX=36902 GN=Xyl2 PE=2 SV=1	G	Carbohydrate transport and metabolism	unnamed protein product [Prunus armeniaca]
PaF106G0800029394.01	58	41	55	129	152	163	0.962272	0.799606	0.943292	2.34257	2.95755	2.71266	6.47744e-09	1.43141	up	[V]	Defense mechanisms	Cellular Component: plant-type vacuole (GO:0000325);; Molecular Function: ATP binding (GO:0005524);; Cellular Component: vacuolar membrane (GO:0005774);; Cellular Component: membrane (GO:0016020);; Cellular Component: integral component of membrane (GO:0016021);; Molecular Function: ATPase activity (GO:0016887);; Molecular Function: ATPase activity, coupled to transmembrane movement of substances…	K05666|9.8e-134|pmum:103334086|K05666 ATP-binding cassette, subfamily C (CFTR/MRP), member 2 | (RefSeq) LOW QUALITY PROTEIN: ABC transporter C family member 14-like	ABC transporters (ko02010)	[Q]	Secondary metabolites biosynthesis, transport and catabolism	ABC transporter	ABC transporter C family member 4 OS=Arabidopsis thaliana OX=3702 GN=ABCC4 PE=1 SV=2	Q	Secondary metabolites biosynthesis, transport and catabolism	PREDICTED: LOW QUALITY PROTEIN: ABC transporter C family member 14-like [Prunus mume]
PaF106G0600022324.01	85	65	79	10	11	8	5.2678	4.78663	5.03786	0.621554	0.749722	0.468477	3.44622e-10	-2.0955	down	--	--	Molecular Function: nucleic acid binding (GO:0003676);; Molecular Function: RNA-DNA hybrid ribonuclease activity (GO:0004523);;	--	--	--	--	Reverse transcriptase-like	--	E	Amino acid transport and metabolism	hypothetical protein PRUPE_1G097800 [Prunus persica]
PaF106G0600025634.01	88	56	48	11	2	14	0.903609	0.682822	0.508863	0.122103	0.020519	0.14052	2.58672e-06	-1.7441	down	--	--	Molecular Function: aspartic-type endopeptidase activity (GO:0004190);; Cellular Component: integral component of membrane (GO:0016021);;	K01381|3.7e-61|sly:101249745|K01381 saccharopepsin [EC:3.4.23.25] | (RefSeq) aspartic proteinase CDR1	--	[O]	Posttranslational modification, protein turnover, chaperones	Xylanase inhibitor N-terminal	Aspartyl protease 37 OS=Oryza sativa subsp. japonica OX=39947 GN=AP37 PE=3 SV=2	O	Posttranslational modification, protein turnover, chaperones	unnamed protein product [Prunus armeniaca]
PaF106G0100002149.01	2359	2396	2151	960	797	1212	11.8257	14.3762	11.123	5.23464	4.66471	6.08471	2.55263e-20	-1.11787	down	--	--	Molecular Function: structural constituent of cell wall (GO:0005199);; Biological Process: plant-type cell wall organization (GO:0009664);;	--	--	--	--	Pollen protein Ole e 1 like	--	S	Function unknown	PREDICTED: extensin-2-like, partial [Prunus mume]
PaF106G0700027901.01	466	389	341	17	40	46	7.12764	7.117	5.37845	0.280709	0.705609	0.693125	6.08301e-37	-3.03521	down	[Q]	Secondary metabolites biosynthesis, transport and catabolism	Molecular Function: oxidoreductase activity (GO:0016491);; Molecular Function: metal ion binding (GO:0046872);;	K13229|1.3e-80|ats:109766943|K13229 2,4-dihydroxy-1,4-benzoxazin-3-one-glucoside dioxygenase [EC:1.14.11.59] | (RefSeq) LOC109766943; DIBOA-glucoside dioxygenase BX6-like	Benzoxazinoid biosynthesis (ko00402)	[QR]	Secondary metabolites biosynthesis, transport and catabolism;; General function prediction only	2OG-Fe(II) oxygenase superfamily	1-aminocyclopropane-1-carboxylate oxidase homolog 4 OS=Arabidopsis thaliana OX=3702 GN=At1g03400 PE=2 SV=1	Q	Secondary metabolites biosynthesis, transport and catabolism	PREDICTED: 1-aminocyclopropane-1-carboxylate oxidase homolog 4-like [Prunus mume]
PaF106G0300011576.01	231	67	199	41	41	43	3.68735	1.24538	3.21526	0.622213	0.709989	0.59155	5.02799e-06	-1.45936	down	[G]	Carbohydrate transport and metabolism	Molecular Function: UDP-glycosyltransferase activity (GO:0008194);; Cellular Component: intracellular membrane-bounded organelle (GO:0043231);;	K23452|1.9e-70|bna:106397643|K23452 UDP-glucosyltransferase 85A [EC:2.4.1.-] | (RefSeq) UDP-glycosyltransferase 85A2 isoform X2	Zeatin biosynthesis (ko00908)	[GC]	Carbohydrate transport and metabolism;; Energy production and conversion	UDP-glucoronosyl and UDP-glucosyl transferase	UDP-glycosyltransferase 83A1 OS=Arabidopsis thaliana OX=3702 GN=UGT83A1 PE=2 SV=1	--	--	PREDICTED: UDP-glycosyltransferase 83A1-like [Prunus mume]
PaF106G0700027591.01	337	292	210	66	90	161	3.94055	4.0793	2.53339	0.832261	1.21977	1.88463	8.48576e-06	-1.16965	down	[IQ]	Lipid transport and metabolism;; Secondary metabolites biosynthesis, transport and catabolism	Molecular Function: CoA-ligase activity (GO:0016405);;	K01904|1.8e-290|pmum:103339831|K01904 4-coumarate--CoA ligase [EC:6.2.1.12] | (RefSeq) 4-coumarate--CoA ligase-like 7	Ubiquinone and other terpenoid-quinone biosynthesis (ko00130);; Phenylpropanoid biosynthesis (ko00940)	[I]	Lipid transport and metabolism	AMP-binding enzyme	4-coumarate--CoA ligase-like 7 OS=Arabidopsis thaliana OX=3702 GN=4CLL7 PE=1 SV=1	I	Lipid transport and metabolism	unnamed protein product [Prunus armeniaca]
PaF106G0300011107.01	404	405	468	0	0	0	11.9254	16.2179	14.9199	0	0	0	2.76776e-81	-5.8154	down	--	--	Cellular Component: integral component of membrane (GO:0016021);;	--	--	--	--	--	--	--	--	hypothetical protein Prudu_010474, partial [Prunus dulcis]
PaF106G0100003854.01	1646	601	781	169	327	196	34.8554	15.2224	17.0534	3.89216	8.05942	4.1539	0.000358509	-1.32666	down	[E]	Amino acid transport and metabolism	Molecular Function: channel activity (GO:0015267);; Cellular Component: integral component of membrane (GO:0016021);;	K09874|4.1e-142|pmum:103341593|K09874 aquaporin NIP | (RefSeq) probable aquaporin NIP-type	--	[G]	Carbohydrate transport and metabolism	Major intrinsic protein	Probable aquaporin NIP-type OS=Nicotiana alata OX=4087 PE=2 SV=1	G	Carbohydrate transport and metabolism	unnamed protein product [Prunus armeniaca]
PaF106G0200009648.01	234	208	195	809	997	1136	1.45196	1.5449	1.24379	5.46298	7.22417	7.05424	3.82239e-54	2.2021	up	--	--	Molecular Function: ion channel activity (GO:0005216);; Cellular Component: integral component of membrane (GO:0016021);;	K05391|5.0e-271|pper:18787509|K05391 cyclic nucleotide gated channel, plant | (RefSeq) cyclic nucleotide-gated ion channel 1 isoform X1	Plant-pathogen interaction (ko04626)	[PT]	Inorganic ion transport and metabolism;; Signal transduction mechanisms	Cyclic nucleotide-binding domain	Cyclic nucleotide-gated ion channel 1 OS=Arabidopsis thaliana OX=3702 GN=CNGC1 PE=1 SV=1	U	Intracellular trafficking, secretion, and vesicular transport	uncharacterized protein LOC110761081 isoform X1 [Prunus avium]
PaF106G0200007143.01	5	11	3	56	74	79	0.019356	0.059876	0.013425	0.286632	0.404472	0.373852	1.21015e-10	2.2912	up	[R]	General function prediction only	Biological Process: defense response (GO:0006952);; Molecular Function: ADP binding (GO:0043531);;	K12818|4.1e-158|mtr:MTR_0267s0070|K12818 ATP-dependent RNA helicase DHX8/PRP22 [EC:3.6.4.13] | (RefSeq) NB-ARC domain disease resistance protein, putative	Spliceosome (ko03040)	[T]	Signal transduction mechanisms	NB-ARC domain	Putative disease resistance RPP13-like protein 1 OS=Arabidopsis thaliana OX=3702 GN=RPPL1 PE=3 SV=1	T	Signal transduction mechanisms	PREDICTED: putative disease resistance RPP13-like protein 1 [Prunus mume]
PaF106G0300012745.01	655	595	520	104	93	125	11.1167	12.0707	9.09839	1.90813	1.83047	2.11555	2.1157e-42	-2.25236	down	--	--	Molecular Function: nucleic acid binding (GO:0003676);; Molecular Function: aspartic-type endopeptidase activity (GO:0004190);; Biological Process: DNA integration (GO:0015074);;	K12349|2.2e-102|ccaj:109806181|K12349 neutral ceramidase [EC:3.5.1.23] | (RefSeq) neutral ceramidase-like	Sphingolipid metabolism (ko00600)	[R]	General function prediction only	Integrase zinc binding domain	--	L	Replication, recombination and repair	transposable element gene [Prunus dulcis]
PaF106G0200009897.01	297	239	245	46	18	74	4.44786	4.29868	3.7758	0.751353	0.302818	1.10347	3.28255e-13	-2.04094	down	[G]	Carbohydrate transport and metabolism	Molecular Function: UDP-glycosyltransferase activity (GO:0008194);;	K13493|2.2e-113|bna:106432180|K13493 cytokinin-N-glucosyltransferase [EC:2.4.1.-] | (RefSeq) UDP-glycosyltransferase 76C2	Zeatin biosynthesis (ko00908)	[GC]	Carbohydrate transport and metabolism;; Energy production and conversion	UDP-glucoronosyl and UDP-glucosyl transferase	UDP-glycosyltransferase 76F1 OS=Arabidopsis thaliana OX=3702 GN=UGT76F1 PE=2 SV=1	--	--	PREDICTED: UDP-glycosyltransferase 76F1-like [Prunus mume]
PaF106G0600025012.01	1764	1354	1649	657	674	558	79.1945	72.7588	76.3702	32.0906	35.2892	25.0776	7.00712e-18	-1.18552	down	--	--	Biological Process: lipid transport (GO:0006869);; Molecular Function: lipid binding (GO:0008289);;	--	--	--	--	Protease inhibitor/seed storage/LTP family	Non-specific lipid-transfer protein 1 OS=Prunus dulcis OX=3755 PE=3 SV=1	--	--	non-specific lipid-transfer protein-like [Prunus avium]
PaF106G0300012027.01	137	96	117	290	330	342	2.39897	2.00507	2.11267	5.5285	6.74887	6.01061	1.89417e-15	1.45741	up	[QR]	Secondary metabolites biosynthesis, transport and catabolism;; General function prediction only	Molecular Function: oxidoreductase activity (GO:0016491);;	K08070|2.7e-69|crb:17894979|K08070 2-alkenal reductase [EC:1.3.1.74] | (RefSeq) 2-alkenal reductase (NADP(+)-dependent)	--	[R]	General function prediction only	Zinc-binding dehydrogenase	2-alkenal reductase (NADP(+)-dependent) OS=Nicotiana tabacum OX=4097 GN=DBR PE=1 SV=1	S	Function unknown	unnamed protein product [Prunus armeniaca]
PaF106G0300012730.01	102	57	170	230	291	282	4.4191	2.91045	7.60121	11.0038	14.8353	12.4025	1.74186e-05	1.18969	up	--	--	Cellular Component: integral component of membrane (GO:0016021);;	--	--	--	--	--	--	--	--	hypothetical protein PRUPE_3G158900 [Prunus persica]
PaF106G0600024645.01	50	29	37	113	105	96	1.10903	0.816714	0.871039	2.8557	3.05355	2.13474	6.93987e-06	1.29366	up	[Q]	Secondary metabolites biosynthesis, transport and catabolism	Molecular Function: oxidoreductase activity (GO:0016491);;	K00002|4.2e-181|pper:18773883|K00002 alcohol dehydrogenase (NADP+) [EC:1.1.1.2] | (RefSeq) aldo-keto reductase family 4 member C9	Glycolysis / Gluconeogenesis (ko00010);; Pentose and glucuronate interconversions (ko00040);; Glycerolipid metabolism (ko00561)	[R]	General function prediction only	Aldo/keto reductase family	NADPH-dependent aldo-keto reductase, chloroplastic OS=Arabidopsis thaliana OX=3702 GN=AKR4C9 PE=1 SV=1	L	Replication, recombination and repair	unnamed protein product [Prunus armeniaca]
PaF106G0800030242.01	27	18	41	156	120	143	2.00941	1.56998	3.35042	12.8088	10.6836	11.4729	5.56401e-12	1.96859	up	[C]	Energy production and conversion	Molecular Function: FMN binding (GO:0010181);; Molecular Function: oxidoreductase activity (GO:0016491);;	K05894|2.8e-37|pavi:110750737|K05894 12-oxophytodienoic acid reductase [EC:1.3.1.42] | (RefSeq) 12-oxophytodienoate reductase 1-like	alpha-Linolenic acid metabolism (ko00592)	[CR]	Energy production and conversion;; General function prediction only	NADH:flavin oxidoreductase / NADH oxidase family	12-oxophytodienoate reductase 2 OS=Arabidopsis thaliana OX=3702 GN=OPR2 PE=1 SV=2	C	Energy production and conversion	PREDICTED: putative 12-oxophytodienoate reductase 11 [Prunus mume]
PaF106G0100001853.01	311	310	373	74	69	80	1.62492	1.97378	2.0663	0.37847	0.388869	0.374577	1.35116e-22	-1.91743	down	[R]	General function prediction only	Biological Process: defense response (GO:0006952);; Molecular Function: ADP binding (GO:0043531);;	K15078|2.4e-101|vvi:100255136|K15078 structure-specific endonuclease subunit SLX1 [EC:3.6.1.-] | (RefSeq) putative disease resistance protein RGA1	--	[T]	Signal transduction mechanisms	NB-ARC domain	Putative disease resistance protein RGA3 OS=Solanum bulbocastanum OX=147425 GN=RGA3 PE=2 SV=2	T	Signal transduction mechanisms	unnamed protein product [Prunus armeniaca]
PaF106G0100005263.01	103	74	93	31	12	22	0.931897	0.798692	0.871245	0.300599	0.123817	0.200218	3.62408e-06	-1.50913	down	--	--	Molecular Function: transmembrane receptor protein serine/threonine kinase activity (GO:0004675);; Molecular Function: ATP binding (GO:0005524);; Cellular Component: plasma membrane (GO:0005886);; Biological Process: protein phosphorylation (GO:0006468);; Cellular Component: integral component of membrane (GO:0016021);;	--	--	--	--	--	--	T	Signal transduction mechanisms	unnamed protein product [Prunus armeniaca]
PaF106G0400018181.01	650	518	820	199	225	254	20.6707	19.7195	26.9072	6.87054	8.33101	8.07015	3.23546e-16	-1.38292	down	--	--	Biological Process: nucleocytoplasmic transport (GO:0006913);; Cellular Component: nuclear pore central transport channel (GO:0044613);;	--	--	[U]	Intracellular trafficking, secretion, and vesicular transport	Nuclear transport factor 2 (NTF2) domain	Nuclear transport factor 2B OS=Arabidopsis thaliana OX=3702 GN=NTF2B PE=1 SV=1	U	Intracellular trafficking, secretion, and vesicular transport	nuclear transport factor 2 [Prunus persica]
PaF106G0400017668.01	1579	1203	1305	3311	2985	3522	24.5047	22.3461	20.8463	55.8722	54.9993	54.818	1.17338e-53	1.33783	up	[C]	Energy production and conversion	Biological Process: lipid metabolic process (GO:0006629);; Cellular Component: integral component of membrane (GO:0016021);; Molecular Function: lipase activity (GO:0016298);;	K00026|3.1e-41|pmum:103324868|K00026 malate dehydrogenase [EC:1.1.1.37] | (RefSeq) malate dehydrogenase, mitochondrial-like	Citrate cycle (TCA cycle) (ko00020);; Cysteine and methionine metabolism (ko00270);; Pyruvate metabolism (ko00620);; Glyoxylate and dicarboxylate metabolism (ko00630);; Carbon fixation in photosynthetic organisms (ko00710);; Carbon metabolism (ko01200)	--	--	GDSL-like Lipase/Acylhydrolase	GDSL esterase/lipase At1g31550 OS=Arabidopsis thaliana OX=3702 GN=At1g31550 PE=2 SV=1	C	Energy production and conversion	PREDICTED: GDSL esterase/lipase At1g31550-like [Prunus mume]
PaF106G0300012568.01	1401	1208	1288	2095	2734	2927	8.76099	9.09989	8.34185	14.2957	20.03	18.3598	1.11295e-19	1.05383	up	[S]	Function unknown	Molecular Function: protein kinase activity (GO:0004672);; Molecular Function: ATP binding (GO:0005524);; Cellular Component: integral component of membrane (GO:0016021);;	K10406|4.7e-08|smo:SELMODRAFT_105488|K10406 kinesin family member C2/C3 | (RefSeq) hypothetical protein	--	--	--	Malectin domain	Probable LRR receptor-like serine/threonine-protein kinase At1g07650 OS=Arabidopsis thaliana OX=3702 GN=At1g07650 PE=1 SV=1	T	Signal transduction mechanisms	probable LRR receptor-like serine/threonine-protein kinase At1g07650 isoform X1 [Prunus avium]
PaF106G0300014513.01	19	14	20	140	139	180	0.252453	0.217274	0.276305	2.09293	2.24294	2.4819	2.62371e-23	2.68231	up	--	--	Biological Process: signal transduction (GO:0007165);; Molecular Function: ADP binding (GO:0043531);;	K23533|3.4e-70|nta:107799167|K23533 leucine-rich repeat and immunoglobulin-like domain-containing nogo receptor-interacting protein | (RefSeq) disease resistance protein TAO1-like	--	--	--	Leucine rich repeat	Disease resistance protein ADR2 OS=Arabidopsis thaliana OX=3702 GN=ADR2 PE=2 SV=1	S	Function unknown	TMV resistance protein N-like isoform X1 [Prunus avium]
PaF106G0400018178.01	363	166	166	899	754	832	3.85777	2.1031	1.82164	10.4087	9.36461	8.86282	2.30026e-17	1.787	up	--	--	Biological Process: cellulose microfibril organization (GO:0010215);; Cellular Component: anchored component of membrane (GO:0031225);;	K10956|4.3e-21|obr:102718200|K10956 protein transport protein SEC61 subunit alpha | (RefSeq) preprotein translocase subunit SECY, chloroplastic	Protein export (ko03060);; Protein processing in endoplasmic reticulum (ko04141);; Phagosome (ko04145)	--	--	COBRA-like protein	COBRA-like protein 7 OS=Arabidopsis thaliana OX=3702 GN=COBL7 PE=2 SV=2	S	Function unknown	unnamed protein product [Prunus armeniaca]
PaF106G0800029962.01	510	326	534	188	172	201	11.6925	8.94578	12.6309	4.67366	4.60358	4.6118	7.5234e-10	-1.11734	down	[R]	General function prediction only	Molecular Function: acid phosphatase activity (GO:0003993);;	K20728|2.5e-43|thj:104814965|K20728 vegetative storage protein 2 | (RefSeq) vegetative storage protein 2-like	MAPK signaling pathway - plant (ko04016)	--	--	HAD superfamily, subfamily IIIB (Acid phosphatase)	Acid phosphatase 1 OS=Solanum lycopersicum OX=4081 GN=APS1 PE=2 SV=1	S	Function unknown	PREDICTED: acid phosphatase 1-like isoform X2 [Prunus mume]
PaF106G0100006404.01	901	631	785	1918	1371	1980	11.4602	9.60588	10.3096	26.5771	20.3693	25.229	1.48391e-22	1.23754	up	--	--	Molecular Function: UDP-glycosyltransferase activity (GO:0008194);; Cellular Component: intracellular membrane-bounded organelle (GO:0043231);;	K22845|3.8e-263|pmum:103319270|K22845 phlorizin synthase [EC:2.4.1.357] | (RefSeq) UDP-glycosyltransferase 88F3-like	Flavonoid biosynthesis (ko00941)	[GC]	Carbohydrate transport and metabolism;; Energy production and conversion	UDP-glucoronosyl and UDP-glucosyl transferase	UDP-glycosyltransferase 88F3 OS=Pyrus communis OX=23211 GN=UGT88F3 PE=2 SV=1	--	--	unnamed protein product [Prunus armeniaca]
PaF106G0400015323.01	477	379	428	756	932	1043	9.05021	8.58527	8.19663	14.7434	19.359	18.2903	3.80777e-18	1.14051	up	--	--	Biological Process: signal transduction (GO:0007165);; Molecular Function: NADH pyrophosphatase activity (GO:0035529);; Molecular Function: ADP-ribose diphosphatase activity (GO:0047631);; Molecular Function: NAD binding (GO:0051287);;	--	--	[T]	Signal transduction mechanisms	Nudix hydrolase domain	Nudix hydrolase 10 OS=Arabidopsis thaliana OX=3702 GN=NUDT10 PE=1 SV=1	T	Signal transduction mechanisms	PREDICTED: nudix hydrolase 10-like isoform X1 [Prunus mume]
PaF106G0800029503.01	96	56	63	265	328	454	1.47798	1.00138	1.00832	4.51968	6.05664	7.12032	7.63259e-23	2.14521	up	[P]	Inorganic ion transport and metabolism	Molecular Function: oxidoreductase activity (GO:0016491);; Molecular Function: flavin adenine dinucleotide binding (GO:0050660);; Molecular Function: NADP binding (GO:0050661);;	K11816|2.1e-186|pmum:103333856|K11816 indole-3-pyruvate monooxygenase [EC:1.14.13.168] | (RefSeq) probable indole-3-pyruvate monooxygenase YUCCA10	Tryptophan metabolism (ko00380)	[Q]	Secondary metabolites biosynthesis, transport and catabolism	Pyridine nucleotide-disulphide oxidoreductase	Probable indole-3-pyruvate monooxygenase YUCCA10 OS=Arabidopsis thaliana OX=3702 GN=YUC10 PE=2 SV=1	Q	Secondary metabolites biosynthesis, transport and catabolism	hypothetical protein PRUPE_8G252500 [Prunus persica]
PaF106G0300013837.01	23	48	28	144	132	72	0.72104	1.7969	0.908117	4.97695	4.89197	2.27032	3.37858e-05	1.4138	up	--	--	Cellular Component: integral component of membrane (GO:0016021);;	--	--	[E]	Amino acid transport and metabolism	Transmembrane amino acid transporter protein	Lysine histidine transporter 2 OS=Arabidopsis thaliana OX=3702 GN=LHT2 PE=1 SV=1	E	Amino acid transport and metabolism	PREDICTED: lysine histidine transporter-like 5 [Prunus mume]
PaF106G0800030640.01	375	404	345	39	105	93	4.51149	5.81816	4.2824	0.50972	1.47516	1.11081	5.6944e-13	-1.87038	down	--	--	Biological Process: amino acid transmembrane transport (GO:0003333);; Cellular Component: plasma membrane (GO:0005886);; Molecular Function: amino acid transmembrane transporter activity (GO:0015171);; Cellular Component: integral component of membrane (GO:0016021);;	K13946|1.0e-287|pmum:103334805|K13946 auxin influx carrier (AUX1 LAX family) | (RefSeq) auxin transporter-like protein 2	Plant hormone signal transduction (ko04075)	[E]	Amino acid transport and metabolism	Transmembrane amino acid transporter protein	Auxin transporter-like protein 2 OS=Arabidopsis thaliana OX=3702 GN=LAX2 PE=2 SV=1	E	Amino acid transport and metabolism	unnamed protein product [Prunus armeniaca]
PaF106G0100005969.01	0	5	4	852	822	899	0	0.137409	0.090301	22.1668	22.9299	21.522	8.64379e-137	6.44157	up	--	--	Molecular Function: DNA binding (GO:0003677);; Cellular Component: nucleus (GO:0005634);;	--	--	--	--	B3 DNA binding domain	--	K	Transcription	unnamed protein product [Prunus armeniaca]
PaF106G0100006504.01	515	551	494	212	230	229	1.61935	2.08154	1.59984	0.723309	0.842797	0.72047	5.9526e-11	-1.07784	down	--	--	Cellular Component: nucleus (GO:0005634);; Molecular Function: peptidase activity (GO:0008233);;	K02365|0.0e+00|pmum:103319233|K02365 separase [EC:3.4.22.49] | (RefSeq) separase	--	[D]	Cell cycle control, cell division, chromosome partitioning	--	Separase OS=Arabidopsis thaliana OX=3702 GN=ESP1 PE=2 SV=1	D	Cell cycle control, cell division, chromosome partitioning	PREDICTED: separase [Prunus mume]
PaF106G0100004942.01	578	565	604	198	296	290	10.4974	12.3246	11.7199	4.03671	6.29514	5.46548	7.06222e-09	-1.01198	down	[R]	General function prediction only	Molecular Function: GTP binding (GO:0005525);; Cellular Component: microtubule (GO:0005874);; Biological Process: chloroplast organization (GO:0009658);; Biological Process: embryo development ending in seed dormancy (GO:0009793);; Molecular Function: hydrolase activity (GO:0016787);; Biological Process: cell division (GO:0051301);; Biological Process: shoot apical meristem development (GO:190218…	K24104|1.3e-171|pmum:103320471|K24104 GPN-loop GTPase | (RefSeq) GPN-loop GTPase 2	--	[R]	General function prediction only	Conserved hypothetical ATP binding protein	GPN-loop GTPase QQT1 OS=Arabidopsis thaliana OX=3702 GN=QQT1 PE=1 SV=1	S	Function unknown	PREDICTED: GPN-loop GTPase 2 [Prunus mume]
PaF106G0100004692.01	61	82	73	164	276	280	0.423964	0.683241	0.523706	1.24952	2.26063	1.9676	4.41534e-10	1.58084	up	[ET]	Amino acid transport and metabolism;; Signal transduction mechanisms	Molecular Function: G-protein coupled receptor activity (GO:0004930);; Molecular Function: ligand-gated ion channel activity (GO:0015276);; Cellular Component: integral component of membrane (GO:0016021);;	K05387|0.0e+00|pmum:103320682|K05387 glutamate receptor, ionotropic, plant | (RefSeq) glutamate receptor 2.8-like	--	[PET]	Inorganic ion transport and metabolism;; Amino acid transport and metabolism;; Signal transduction mechanisms	Receptor family ligand binding region	Glutamate receptor 2.8 OS=Arabidopsis thaliana OX=3702 GN=GLR2.8 PE=2 SV=2	--	--	glutamate receptor 2.8-like [Prunus dulcis]
PaF106G0300012067.01	268	110	263	60	13	44	6.14844	3.01417	6.2161	1.49361	0.338059	0.992082	1.34949e-07	-1.75814	down	[K]	Transcription	Molecular Function: ribonuclease III activity (GO:0004525);; Biological Process: RNA processing (GO:0006396);;	K11592|8.0e-41|bdi:100842689|K11592 endoribonuclease Dicer [EC:3.1.26.-] | (RefSeq) endoribonuclease Dicer homolog 1	--	[A]	RNA processing and modification	Ribonuclease III domain	Ribonuclease 3-like protein 3 OS=Oryza sativa subsp. japonica OX=39947 GN=Os06g0358800 PE=2 SV=1	A	RNA processing and modification	unnamed protein product [Prunus armeniaca]
PaF106G0300011913.01	1058	755	1021	1901	1793	1748	8.30753	7.20332	8.29051	16.3122	16.3883	13.8028	1.15136e-16	1.01711	up	[T]	Signal transduction mechanisms	Molecular Function: protein serine/threonine kinase activity (GO:0004674);; Molecular Function: ATP binding (GO:0005524);; Biological Process: recognition of pollen (GO:0048544);;	K24104|8.4e-72|thj:104799061|K24104 GPN-loop GTPase | (RefSeq) LOW QUALITY PROTEIN: uncharacterized protein LOC104799061	--	--	--	Protein tyrosine and serine/threonine kinase	Putative G-type lectin S-receptor-like serine/threonine-protein kinase At1g61610 OS=Arabidopsis thaliana OX=3702 GN=At1g61610 PE=3 SV=1	T	Signal transduction mechanisms	G-type lectin S-receptor-like serine/threonine-protein kinase At4g27290 [Prunus dulcis]
PaF106G0200009401.01	867	672	855	0	0	0	14.0077	13.5104	14.6706	0	0	0	8.45032e-119	-6.66431	down	[F]	Nucleotide transport and metabolism	Molecular Function: catalytic activity (GO:0003824);; Biological Process: nucleoside metabolic process (GO:0009116);;	K07870|2.2e-10|pxb:103958384|K07870 mitochondrial Rho GTPase 1 [EC:3.6.5.-] | (RefSeq) uncharacterized protein LOC103958384	--	--	--	Phosphorylase superfamily	--	F	Nucleotide transport and metabolism	bark storage protein A-like isoform X1 [Prunus avium]
PaF106G0200007276.01	255	121	257	6	11	37	2.47137	1.39893	2.57466	0.054592	0.118246	0.359655	2.00905e-14	-2.53722	down	--	--	Molecular Function: GTPase activity (GO:0003924);; Molecular Function: GTP binding (GO:0005525);; Cellular Component: cytoplasm (GO:0005737);; Molecular Function: microtubule binding (GO:0008017);; Cellular Component: membrane (GO:0016020);; Biological Process: organelle fission (GO:0048285);;	K17065|7.3e-42|ats:109745633|K17065 dynamin 1-like protein [EC:3.6.5.5] | (RefSeq) LOC109745633; dynamin-related protein 3A-like	--	[UR]	Intracellular trafficking, secretion, and vesicular transport;; General function prediction only	Dynamin central region	Dynamin-related protein 4C OS=Arabidopsis thaliana OX=3702 GN=DRP4C PE=2 SV=1	U	Intracellular trafficking, secretion, and vesicular transport	unnamed protein product [Prunus armeniaca]
PaF106G0700028351.01	707	518	626	258	223	255	4.23154	3.70776	3.8653	1.677	1.5543	1.52521	6.15026e-17	-1.18906	down	--	--	Molecular Function: DNA binding (GO:0003677);;	K11498|2.0e-13|mdm:103431402|K11498 centromeric protein E | (RefSeq) uncharacterized protein LOC103431402	--	--	--	Myb-like DNA-binding domain	--	S	Function unknown	unnamed protein product [Prunus armeniaca]
PaF106G0100006050.01	36	17	15	57	43	69	0.51486	0.287994	0.221513	0.903274	0.732669	1.00954	0.0045555	1.02154	up	--	--	Cellular Component: integral component of membrane (GO:0016021);;	K23612|1.4e-12|han:110887064|K23612 neural Wiskott-Aldrich syndrome protein | (RefSeq) basic proline-rich protein-like	Endocytosis (ko04144)	--	--	--	--	--	--	unnamed protein product [Prunus armeniaca]
PaF106G0400017887.01	273	305	413	84	138	134	2.95131	3.94641	4.61012	0.982278	1.73705	1.45161	1.17759e-07	-1.24934	down	--	--	Molecular Function: catechol oxidase activity (GO:0004097);; Biological Process: pigment biosynthetic process (GO:0046148);; Molecular Function: metal ion binding (GO:0046872);;	K00422|0.0e+00|pper:18781346|K00422 polyphenol oxidase [EC:1.10.3.1] | (RefSeq) polyphenol oxidase, chloroplastic	Tyrosine metabolism (ko00350);; Isoquinoline alkaloid biosynthesis (ko00950)	--	--	Protein of unknown function (DUF_B2219)	Polyphenol oxidase, chloroplastic OS=Malus domestica OX=3750 PE=1 SV=1	S	Function unknown	unnamed protein product [Prunus armeniaca]
PaF106G0300013244.01	851	571	550	95	83	155	15.7541	12.6106	10.4304	1.90095	1.89953	3.03983	1.39439e-32	-2.30328	down	[K]	Transcription	Molecular Function: O-methyltransferase activity (GO:0008171);; Biological Process: methylation (GO:0032259);; Molecular Function: protein dimerization activity (GO:0046983);;	K16040|1.6e-194|pmum:103328492|K16040 trans-resveratrol di-O-methyltransferase [EC:2.1.1.240] | (RefSeq) trans-resveratrol di-O-methyltransferase-like	Stilbenoid, diarylheptanoid and gingerol biosynthesis (ko00945)	[R]	General function prediction only	O-methyltransferase domain	Probable O-methyltransferase 3 OS=Humulus lupulus OX=3486 GN=OMT3 PE=2 SV=1	S	Function unknown	unnamed protein product [Prunus armeniaca]
PaF106G0100000829.01	0	0	0	70	58	65	0	0	0	1.19671	1.05729	1.02354	1.70426e-19	3.29767	up	--	--	Molecular Function: nucleic acid binding (GO:0003676);; Biological Process: DNA integration (GO:0015074);; Molecular Function: kinase activity (GO:0016301);;	K03515|4.0e-54|ghi:107894697|K03515 DNA repair protein REV1 [EC:2.7.7.-] | (RefSeq) uncharacterized protein LOC107894697	--	[R]	General function prediction only	GAG-pre-integrase domain	Retrovirus-related Pol polyprotein from transposon RE2 OS=Arabidopsis thaliana OX=3702 GN=RE2 PE=4 SV=1	L	Replication, recombination and repair	wall-associated kinase 2 [Prunus dulcis]
PaF106G0400017487.01	350	172	281	76	91	91	2.45378	1.47401	2.01521	0.574258	0.742857	0.610477	8.07618e-09	-1.36367	down	--		Molecular Function: protein kinase activity (GO:0004672);; Molecular Function: ATP binding (GO:0005524);; Cellular Component: integral component of membrane (GO:0016021);;	K13418|2.3e-68|ppp:112278174|K13418 somatic embryogenesis receptor kinase 1 [EC:2.7.10.1 2.7.11.1] | (RefSeq) LRR receptor kinase BAK1-like	--	--	--	Protein kinase domain	Probable LRR receptor-like serine/threonine-protein kinase At1g07650 OS=Arabidopsis thaliana OX=3702 GN=At1g07650 PE=1 SV=1	T	Signal transduction mechanisms	unnamed protein product [Prunus armeniaca]
PaF106G0300012306.01	168	130	117	52	29	52	2.40437	2.21768	1.72499	0.810251	0.477924	0.742703	1.66263e-06	-1.32511	down	--	--	Molecular Function: UDP-glycosyltransferase activity (GO:0008194);; Cellular Component: intracellular membrane-bounded organelle (GO:0043231);; Molecular Function: quercetin 3-O-glucosyltransferase activity (GO:0080043);; Molecular Function: quercetin 7-O-glucosyltransferase activity (GO:0080044);;	K22706|5.0e-170|pper:18788923|K22706 (R)-mandelonitrile beta-glucosyltransferase [EC:2.4.1.354] | (RefSeq) 7-deoxyloganetin glucosyltransferase	Cyanoamino acid metabolism (ko00460)	[GC]	Carbohydrate transport and metabolism;; Energy production and conversion	UDP-glucoronosyl and UDP-glucosyl transferase	7-deoxyloganetin glucosyltransferase OS=Gardenia jasminoides OX=114476 GN=UGT85A24 PE=1 SV=1	--	--	PREDICTED: 7-deoxyloganetin glucosyltransferase-like [Prunus mume]
PaF106G0200007808.01	12	12	12	81	41	79	0.211189	0.242895	0.218919	1.59591	0.865107	1.43101	1.66332e-07	1.81277	up	[QV]	Secondary metabolites biosynthesis, transport and catabolism;; Defense mechanisms	Molecular Function: monooxygenase activity (GO:0004497);; Molecular Function: iron ion binding (GO:0005506);; Cellular Component: integral component of membrane (GO:0016021);; Molecular Function: oxidoreductase activity, acting on paired donors, with incorporation or reduction of molecular oxygen (GO:0016705);; Molecular Function: heme binding (GO:0020037);;	K23806|2.0e-88|vvi:100246293|K23806 alpha-guaiene 2-oxidase | (RefSeq) premnaspirodiene oxygenase-like	--	[Q]	Secondary metabolites biosynthesis, transport and catabolism	Cytochrome P450	Premnaspirodiene oxygenase OS=Hyoscyamus muticus OX=35626 GN=CYP71D55 PE=1 SV=1	Q	Secondary metabolites biosynthesis, transport and catabolism	PREDICTED: premnaspirodiene oxygenase-like [Prunus mume]
PaF106G0400017245.01	301	252	259	81	98	133	2.67225	2.67893	2.36961	0.783559	1.01205	1.18138	3.26014e-09	-1.20204	down	[R]	General function prediction only	Biological Process: reproduction (GO:0000003);; Biological Process: nuclear division (GO:0000280);; Biological Process: developmental process involved in reproduction (GO:0003006);; Molecular Function: protein binding (GO:0005515);; Cellular Component: cellular_component (GO:0005575);; Cellular Component: intracellular (GO:0005622);; Cellular Component: cell (GO:0005623);; Cellular Component: nuc…	K14152|3.8e-124|cpep:111783531|K14152 phosphoribosyl-ATP pyrophosphohydrolase / phosphoribosyl-AMP cyclohydrolase / histidinol dehydrogenase [EC:3.6.1.31 3.5.4.19 1.1.1.23] | (RefSeq) uncharacterized protein LOC111783531	Histidine metabolism (ko00340);; Biosynthesis of amino acids (ko01230)	--	--	Tetratricopeptide repeat	Protein POLLENLESS 3 OS=Arabidopsis thaliana OX=3702 GN=MS5 PE=2 SV=2	S	Function unknown	unnamed protein product [Prunus armeniaca]
PaF106G0200007131.01	444	467	525	160	134	233	3.09986	3.88943	3.83787	1.2515	1.08369	1.63262	1.73444e-12	-1.29515	down	--	--	Molecular Function: molecular_function (GO:0003674);; Molecular Function: nucleic acid binding (GO:0003676);; Molecular Function: RNA binding (GO:0003723);; Molecular Function: catalytic activity (GO:0003824);; Molecular Function: nuclease activity (GO:0004518);; Molecular Function: endonuclease activity (GO:0004519);; Molecular Function: binding (GO:0005488);; Cellular Component: cellular_compon…	K20291|8.6e-09|gab:108479373|K20291 conserved oligomeric Golgi complex subunit 4 | (RefSeq) pentatricopeptide repeat-containing protein At4g01400, mitochondrial-like	--	[R]	General function prediction only	PPR repeat family	Pentatricopeptide repeat-containing protein At4g20740 OS=Arabidopsis thaliana OX=3702 GN=At4g20740 PE=3 SV=1	S	Function unknown	unnamed protein product [Prunus armeniaca]
PaF106G0600024149.01	301	198	229	496	472	450	10.0722	7.92837	7.87619	18.0386	18.4145	15.0661	3.08998e-09	1.01242	up	--	--	Molecular Function: transcription regulatory region sequence-specific DNA binding (GO:0000976);; Molecular Function: transcription factor activity, sequence-specific DNA binding (GO:0003700);; Cellular Component: nucleus (GO:0005634);; Molecular Function: sequence-specific DNA binding (GO:0043565);; Biological Process: positive regulation of transcription, DNA-templated (GO:0045893);;	--	--	--	--	bZIP transcription factor	Basic leucine zipper 4 OS=Arabidopsis thaliana OX=3702 GN=BZIP4 PE=1 SV=1	K	Transcription	unnamed protein product [Prunus armeniaca]
PaF106G0200008806.01	68	43	68	152	131	170	1.6245	1.22026	1.66705	3.9787	3.66123	4.08776	2.27469e-07	1.26952	up	[P]	Inorganic ion transport and metabolism	Molecular Function: manganese ion transmembrane transporter activity (GO:0005384);; Cellular Component: integral component of membrane (GO:0016021);; Biological Process: cellular manganese ion homeostasis (GO:0030026);;	K22736|7.6e-128|pmum:103331963|K22736 vacuolar iron transporter family protein | (RefSeq) uncharacterized protein LOC103331963	--	--	--	VIT family	--	S	Function unknown	unnamed protein product [Prunus armeniaca]
PaF106G0400015069.01	3	0	5	71	62	49	0.035244	0	0.079984	1.34538	1.27482	0.861879	2.17601e-12	2.58226	up	[G]	Carbohydrate transport and metabolism	Molecular Function: polygalacturonase activity (GO:0004650);; Cellular Component: extracellular region (GO:0005576);; Biological Process: carbohydrate metabolic process (GO:0005975);; Biological Process: cell wall organization (GO:0071555);;	K01184|1.0e-221|pmum:103326925|K01184 polygalacturonase [EC:3.2.1.15] | (RefSeq) polygalacturonase-like	Pentose and glucuronate interconversions (ko00040)	--	--	Glycosyl hydrolases family 28	Polygalacturonase OS=Prunus persica OX=3760 PE=2 SV=1	G	Carbohydrate transport and metabolism	unnamed protein product [Prunus armeniaca]
PaF106G0700028053.01	3910	3149	3822	6672	6073	8066	35.9252	33.5066	36.2093	65.1422	64.0998	72.9642	8.93473e-41	1.00946	up	[V]	Defense mechanisms	Molecular Function: ATP binding (GO:0005524);; Cellular Component: integral component of membrane (GO:0016021);; Molecular Function: ATPase activity (GO:0016887);;	K05681|5.6e-160|nsy:104217879|K05681 ATP-binding cassette, subfamily G (WHITE), member 2 | (RefSeq) ABC transporter G family member 9-like	ABC transporters (ko02010)	[Q]	Secondary metabolites biosynthesis, transport and catabolism	ABC-2 type transporter	ABC transporter G family member 22 OS=Arabidopsis thaliana OX=3702 GN=ABCG22 PE=1 SV=1	Q	Secondary metabolites biosynthesis, transport and catabolism	unnamed protein product [Prunus armeniaca]
PaF106G0100004904.01	526	583	437	98	129	186	5.03751	6.77421	4.22257	0.952697	1.34405	1.73264	2.50007e-16	-1.69197	down	--	--	Molecular Function: DNA binding (GO:0003677);; Molecular Function: transcription factor activity, sequence-specific DNA binding (GO:0003700);; Cellular Component: nucleus (GO:0005634);;	K09285|0.0e+00|pper:18788684|K09285 AP2-like factor, ANT lineage | (RefSeq) AP2-like ethylene-responsive transcription factor ANT	--	--	--	AP2 domain	AP2-like ethylene-responsive transcription factor CRL5 OS=Oryza sativa subsp. japonica OX=39947 GN=CRL5 PE=2 SV=1	K	Transcription	unnamed protein product [Prunus armeniaca]
PaF106G0400016052.01	62	54	52	114	151	136	0.949903	0.985032	0.815893	1.91333	2.70529	2.08812	5.67609e-06	1.1777	up	[V]	Defense mechanisms	Molecular Function: antiporter activity (GO:0015297);; Cellular Component: integral component of membrane (GO:0016021);; Molecular Function: xenobiotic transporter activity (GO:0042910);;	K03327|1.6e-231|pavi:110745431|K03327 multidrug resistance protein, MATE family | (RefSeq) protein DETOXIFICATION 19-like	--	[R]	General function prediction only	MatE	Protein DETOXIFICATION 19 OS=Arabidopsis thaliana OX=3702 GN=DTX19 PE=2 SV=1	V	Defense mechanisms	unnamed protein product [Prunus armeniaca]
PaF106G0700028845.01	9939	7522	8887	3789	3501	4799	109.52	99.1875	101.016	45.4392	45.0311	52.9449	1.52337e-37	-1.02645	down	--	--	Molecular Function: GTPase activity (GO:0003924);; Molecular Function: structural constituent of cytoskeleton (GO:0005200);; Molecular Function: GTP binding (GO:0005525);; Cellular Component: cytoplasm (GO:0005737);; Cellular Component: microtubule (GO:0005874);; Biological Process: microtubule-based process (GO:0007017);;	K07375|3.2e-264|pavi:110770194|K07375 tubulin beta | (RefSeq) tubulin beta-5 chain	Phagosome (ko04145)	[Z]	Cytoskeleton	Tubulin/FtsZ family, GTPase domain	Tubulin beta-4 chain OS=Eleusine indica OX=29674 GN=TUBB4 PE=2 SV=1	Z	Cytoskeleton	unnamed protein product [Prunus armeniaca]
PaF106G0800029354.01	811	642	721	320	297	373	14.5017	13.5187	13.4648	6.17654	6.13969	6.75868	1.47722e-16	-1.01811	down	[IQR]	Lipid transport and metabolism;; Secondary metabolites biosynthesis, transport and catabolism;; General function prediction only	Cellular Component: cellular_component (GO:0005575);; Cellular Component: extracellular region (GO:0005576);; Biological Process: biological_process (GO:0008150);; Biological Process: positive regulation of metabolic process (GO:0009893);; Biological Process: regulation of catabolic process (GO:0009894);; Biological Process: positive regulation of catabolic process (GO:0009896);; Biological Proce…	K11170|3.2e-62|var:108329937|K11170 dehydrogenase/reductase SDR family member X [EC:1.1.-.-] | (RefSeq) dehydrogenase/reductase SDR family member on chromosome X-like	--	[Q]	Secondary metabolites biosynthesis, transport and catabolism	short chain dehydrogenase	Dehydrogenase/reductase SDR family member FEY OS=Arabidopsis thaliana OX=3702 GN=FEY PE=1 SV=1	Q	Secondary metabolites biosynthesis, transport and catabolism	unnamed protein product [Prunus armeniaca]
PaF106G0200007243.01	793	729	812	170	189	203	3.7892	4.16955	4.0017	0.881362	1.05218	0.970735	4.2182e-44	-1.89805	down	[R]	General function prediction only	Molecular Function: ADP binding (GO:0043531);;	K12818|2.3e-160|mtr:MTR_0267s0070|K12818 ATP-dependent RNA helicase DHX8/PRP22 [EC:3.6.4.13] | (RefSeq) NB-ARC domain disease resistance protein, putative	Spliceosome (ko03040)	[T]	Signal transduction mechanisms	NB-ARC domain	Putative disease resistance RPP13-like protein 1 OS=Arabidopsis thaliana OX=3702 GN=RPPL1 PE=3 SV=1	T	Signal transduction mechanisms	putative disease resistance RPP13-like protein 1 isoform X2 [Prunus dulcis]
PaF106G0800032560.01	723	579	594	214	226	243	8.0033	7.67266	6.78515	2.56835	2.91968	2.68524	1.7287e-21	-1.33107	down	--	--	Cellular Component: mitochondrion (GO:0005739);;	K17710|1.9e-09|aip:107639204|K17710 pentatricopeptide repeat domain-containing protein 1 | (RefSeq) pentatricopeptide repeat-containing protein At2g18940, chloroplastic	--	[R]	General function prediction only	PPR repeat	Pentatricopeptide repeat-containing protein At2g20710, mitochondrial OS=Arabidopsis thaliana OX=3702 GN=At2g20710 PE=2 SV=1	S	Function unknown	unnamed protein product [Prunus armeniaca]
PaF106G0500018728.01	305	212	362	109	126	144	6.24055	5.18438	7.61696	2.40393	2.9863	2.94545	1.57505e-06	-1.02657	down	--	--	Cellular Component: integral component of membrane (GO:0016021);;	--	--	--	--	--	Cadmium-induced protein AS8 OS=Arabidopsis thaliana OX=3702 GN=At4g19070 PE=2 SV=1	S	Function unknown	PREDICTED: cadmium-induced protein AS8 [Prunus mume]
PaF106G0400017690.01	127	117	108	396	496	603	0.906245	0.9961	0.788841	3.088	4.1366	4.31431	7.27579e-31	2.03537	up	[ET]	Amino acid transport and metabolism;; Signal transduction mechanisms	Molecular Function: ligand-gated ion channel activity (GO:0015276);; Cellular Component: integral component of membrane (GO:0016021);;	K05387|0.0e+00|pmum:103324849|K05387 glutamate receptor, ionotropic, plant | (RefSeq) glutamate receptor 2.7-like	--	[PET]	Inorganic ion transport and metabolism;; Amino acid transport and metabolism;; Signal transduction mechanisms	Ligand-gated ion channel	Glutamate receptor 3.4 OS=Arabidopsis thaliana OX=3702 GN=GLR3.4 PE=2 SV=2	--	--	unnamed protein product [Prunus armeniaca]
PaF106G0600022183.01	915	825	949	1717	1645	1874	13.924	15.0028	14.979	28.627	28.9603	28.4682	8.02729e-28	1.03186	up	--	--	Molecular Function: protein serine/threonine phosphatase activity (GO:0004722);; Molecular Function: metal ion binding (GO:0046872);;	K14497|4.3e-88|pmum:103321870|K14497 protein phosphatase 2C [EC:3.1.3.16] | (RefSeq) probable protein phosphatase 2C 24	MAPK signaling pathway - plant (ko04016);; Plant hormone signal transduction (ko04075)	[T]	Signal transduction mechanisms	Protein phosphatase 2C	Protein phosphatase 2C 3 OS=Arabidopsis thaliana OX=3702 GN=AIP1 PE=1 SV=1	T	Signal transduction mechanisms	unnamed protein product [Prunus armeniaca]
PaF106G0400016118.01	135	137	114	35	43	53	0.657817	0.802147	0.572061	0.186539	0.246171	0.257485	2.45562e-06	-1.27366	down	--		Molecular Function: protein kinase activity (GO:0004672);; Molecular Function: ATP binding (GO:0005524);; Molecular Function: carbohydrate binding (GO:0030246);;	K22133|1.4e-73|egr:104443803|K22133 oxalate---CoA ligase [EC:6.2.1.8] | (RefSeq) oxalate--CoA ligase isoform X2	Glyoxylate and dicarboxylate metabolism (ko00630)	--	--	Protein kinase domain	L-type lectin-domain containing receptor kinase IX.1 OS=Arabidopsis thaliana OX=3702 GN=LECRK91 PE=1 SV=1	T	Signal transduction mechanisms	L-type lectin-domain containing receptor kinase IX.1-like [Prunus yedoensis var. nudiflora]
PaF106G0800032199.01	7	3	13	56	38	53	0.102544	0.038729	0.193106	0.919658	0.6679	0.801162	3.87713e-06	1.72436	up	--	--	Molecular Function: aspartic-type endopeptidase activity (GO:0004190);; Biological Process: proteolysis (GO:0006508);; Biological Process: protein catabolic process (GO:0030163);;	K22683|4.6e-48|mus:103977055|K22683 aspartyl protease family protein [EC:3.4.23.-] | (RefSeq) aspartic proteinase nepenthesin-2-like	--	[O]	Posttranslational modification, protein turnover, chaperones	Xylanase inhibitor C-terminal	Probable aspartyl protease At4g16563 OS=Arabidopsis thaliana OX=3702 GN=At4g16563 PE=2 SV=1	O	Posttranslational modification, protein turnover, chaperones	unnamed protein product [Prunus armeniaca]
PaF106G0300011745.01	70	49	48	8	10	23	1.32405	1.10242	0.921964	0.157317	0.205374	0.433928	0.00024602	-1.34059	down	[M]	Cell wall/membrane/envelope biogenesis	Molecular Function: 3-beta-hydroxy-delta5-steroid dehydrogenase activity (GO:0003854);; Biological Process: steroid biosynthetic process (GO:0006694);;	K09753|1.1e-35|ppp:112293893|K09753 cinnamoyl-CoA reductase [EC:1.2.1.44] | (RefSeq) cinnamoyl-CoA reductase 1-like	Phenylpropanoid biosynthesis (ko00940)	[V]	Defense mechanisms	3-beta hydroxysteroid dehydrogenase/isomerase family	Cinnamoyl-CoA reductase-like SNL6 OS=Oryza sativa subsp. japonica OX=39947 GN=SNL6 PE=3 SV=1	V	Defense mechanisms	PREDICTED: dihydroflavonol-4-reductase-like [Prunus mume]
PaF106G0100005494.01	25	10	20	138	186	107	0.175805	0.079897	0.145998	1.08608	1.57655	0.776094	1.38949e-14	2.40025	up	[G]	Carbohydrate transport and metabolism	Molecular Function: pectate lyase activity (GO:0030570);; Biological Process: pectin catabolic process (GO:0045490);; Molecular Function: metal ion binding (GO:0046872);;	K01728|5.6e-80|pavi:110764871|K01728 pectate lyase [EC:4.2.2.2] | (RefSeq) probable pectate lyase 4	Pentose and glucuronate interconversions (ko00040)	--	--	Pectate lyase	Pectate lyase 1 OS=Hesperocyparis arizonica OX=49011 PE=1 SV=2	G	Carbohydrate transport and metabolism	probable pectate lyase 4 [Prunus avium]
PaF106G0700028092.01	148	93	89	287	230	262	1.93865	1.46206	1.21766	4.13667	3.55275	3.467	2.2886e-08	1.22208	up	[R]	General function prediction only	Molecular Function: anaphase-promoting complex binding (GO:0010997);; Biological Process: cell division (GO:0051301);; Molecular Function: ubiquitin-protein transferase activator activity (GO:0097027);; Biological Process: positive regulation of ubiquitin protein ligase activity (GO:1904668);;	K03363|1.8e-259|pavi:110748657|K03363 cell division cycle 20, cofactor of APC complex | (RefSeq) cell division cycle 20.1, cofactor of APC complex-like	Ubiquitin mediated proteolysis (ko04120)	[DO]	Cell cycle control, cell division, chromosome partitioning;; Posttranslational modification, protein turnover, chaperones	WD domain, G-beta repeat	Cell division cycle 20.1, cofactor of APC complex OS=Arabidopsis thaliana OX=3702 GN=CDC20-1 PE=1 SV=1	--	--	unnamed protein product [Prunus armeniaca]
PaF106G0800031494.01	2395	909	1174	484	615	480	18.6444	8.46136	9.42759	4.09764	5.58676	3.74088	0.00216418	-1.04361	down	[M]	Cell wall/membrane/envelope biogenesis	Molecular Function: protein kinase activity (GO:0004672);; Molecular Function: ATP binding (GO:0005524);; Cellular Component: plasma membrane (GO:0005886);; Cellular Component: plasmodesma (GO:0009506);; Cellular Component: integral component of membrane (GO:0016021);; Biological Process: protein autophosphorylation (GO:0046777);;	K13435|8.0e-97|spen:107018783|K13435 serine/threonine-protein kinase Pto | (RefSeq) receptor-like protein kinase HERK 1 isoform X2	Plant-pathogen interaction (ko04626)	[T]	Signal transduction mechanisms	Protein tyrosine and serine/threonine kinase	Probable receptor-like protein kinase At2g21480 OS=Arabidopsis thaliana OX=3702 GN=At2g21480 PE=3 SV=1	T	Signal transduction mechanisms	PREDICTED: probable receptor-like protein kinase At2g21480 [Prunus mume]
PaF106G0300012012.01	22	18	48	99	63	94	0.2703	0.259707	0.615114	1.33192	0.914351	1.17074	0.000354889	1.22152	up	[V]	Defense mechanisms	Molecular Function: antiporter activity (GO:0015297);; Cellular Component: integral component of membrane (GO:0016021);; Molecular Function: xenobiotic transporter activity (GO:0042910);;	K03327|1.2e-281|pmum:103329387|K03327 multidrug resistance protein, MATE family | (RefSeq) protein DETOXIFICATION 40-like	--	[R]	General function prediction only	MatE	Protein DETOXIFICATION 40 OS=Arabidopsis thaliana OX=3702 GN=DTX40 PE=1 SV=1	L	Replication, recombination and repair	PREDICTED: protein DETOXIFICATION 40-like [Prunus mume]
PaF106G0800032651.01	122	128	170	364	383	437	0.696433	0.871484	0.999608	2.26117	2.55416	2.49744	6.27433e-16	1.47866	up	[K]	Transcription	Biological Process: signal transduction (GO:0007165);; Molecular Function: ADP binding (GO:0043531);;	K00695|2.6e-119|mtr:MTR_6g478030|K00695 sucrose synthase [EC:2.4.1.13] | (RefSeq) sucrose synthase	Starch and sucrose metabolism (ko00500)	--	--	TIR domain	TMV resistance protein N OS=Nicotiana glutinosa OX=35889 GN=N PE=1 SV=1	S	Function unknown	PREDICTED: TMV resistance protein N-like [Prunus mume]
PaF106G0100005914.01	0	0	0	80	53	91	0	0	0	3.67431	2.6692	4.03353	1.40606e-21	3.45293	up	--	--	Molecular Function: diphthine synthase activity (GO:0004164);; Biological Process: peptidyl-diphthamide biosynthetic process from peptidyl-histidine (GO:0017183);;	K00586|4.3e-35|pmum:103321264|K00586 diphthine methyl ester synthase [EC:2.1.1.314] | (RefSeq) probable diphthine methyl ester synthase	--	[J]	Translation, ribosomal structure and biogenesis	--	Probable diphthine methyl ester synthase OS=Arabidopsis thaliana OX=3702 GN=At4g31790 PE=2 SV=1	J	Translation, ribosomal structure and biogenesis	unnamed protein product [Prunus armeniaca]
PaF106G0800031015.01	0	0	0	64	69	94	0	0	0	1.48162	1.70017	2.00029	1.4668e-22	3.51746	up	--	--	Molecular Function: UDP-glycosyltransferase activity (GO:0008194);; Cellular Component: intracellular membrane-bounded organelle (GO:0043231);;	K23260|1.1e-149|pavi:110765167|K23260 scopoletin glucosyltransferase [EC:2.4.1.128] | (RefSeq) UDP-glucose flavonoid 3-O-glucosyltransferase 7-like	Phenylpropanoid biosynthesis (ko00940)	[GC]	Carbohydrate transport and metabolism;; Energy production and conversion	--	UDP-glucose flavonoid 3-O-glucosyltransferase 7 OS=Fragaria ananassa OX=3747 GN=GT7 PE=1 SV=1	--	--	UDP-glucose flavonoid 3-O-glucosyltransferase 7-like [Prunus avium]
PaF106G0700028861.01	594	581	593	217	205	300	6.50776	7.62739	6.70668	2.58854	2.61861	3.29263	6.50696e-15	-1.16886	down	--	--	Cellular Component: integral component of membrane (GO:0016021);;	K13863|4.1e-75|obr:102704603|K13863 solute carrier family 7 (cationic amino acid transporter), member 1 | (RefSeq) uncharacterized LOC102704603	--	--	--	NEMP family	--	S	Function unknown	unnamed protein product [Prunus armeniaca]
PaF106G0300012156.01	209	133	166	6	19	19	5.52118	4.18468	4.5179	0.14804	0.557596	0.4858	3.0518e-20	-2.72868	down	--	--	Molecular Function: polygalacturonase activity (GO:0004650);; Cellular Component: cellular_component (GO:0005575);; Cellular Component: extracellular region (GO:0005576);; Cellular Component: cell wall (GO:0005618);; Cellular Component: cell (GO:0005623);; Biological Process: carbohydrate metabolic process (GO:0005975);; Cellular Component: external encapsulating structure (GO:0030312);; Cellular…	K01213|6.2e-50|pper:109947835|K01213 galacturan 1,4-alpha-galacturonidase [EC:3.2.1.67] | (RefSeq) exopolygalacturonase-like	Pentose and glucuronate interconversions (ko00040)	--	--	Glycosyl hydrolases family 28	Exopolygalacturonase (Fragment) OS=Oenothera organensis OX=3945 PE=2 SV=1	G	Carbohydrate transport and metabolism	exopolygalacturonase-like [Prunus persica]
PaF106G0800030124.01	248	110	108	27	54	35	3.35899	1.86039	1.51069	0.44478	0.883713	0.473179	6.14668e-06	-1.45817	down	[T]	Signal transduction mechanisms	Molecular Function: protein serine/threonine kinase activity (GO:0004674);; Molecular Function: ATP binding (GO:0005524);;	K13430|2.4e-134|pda:103708100|K13430 serine/threonine-protein kinase PBS1 [EC:2.7.11.1] | (RefSeq) serine/threonine-protein kinase PBS1-like	Plant-pathogen interaction (ko04626)	[T]	Signal transduction mechanisms	Protein kinase domain	Probable serine/threonine-protein kinase PBL26 OS=Arabidopsis thaliana OX=3702 GN=PBL26 PE=2 SV=1	T	Signal transduction mechanisms	unnamed protein product [Prunus armeniaca]
PaF106G0500021056.01	187	121	148	370	459	518	2.45813	1.91149	2.00307	5.31292	7.06874	6.84708	7.06945e-19	1.56044	up	--	--	Molecular Function: transcription factor activity, sequence-specific DNA binding (GO:0003700);;	--	--	--	--	TCP family transcription factor	Transcription factor CYCLOIDEA (Fragment) OS=Antirrhinum linkianum OX=102601 GN=CYC PE=3 SV=1	K	Transcription	unnamed protein product [Prunus armeniaca]
PaF106G0800032547.01	24	24	24	397	338	483	0.140792	0.172319	0.149912	2.61563	2.3922	2.93263	1.32443e-68	3.746	up	[R]	General function prediction only	Biological Process: signal transduction (GO:0007165);; Molecular Function: ADP binding (GO:0043531);;	K00695|1.8e-113|mtr:MTR_6g478030|K00695 sucrose synthase [EC:2.4.1.13] | (RefSeq) sucrose synthase	Starch and sucrose metabolism (ko00500)	--	--	TIR domain	Disease resistance protein RUN1 OS=Vitis rotundifolia OX=103349 GN=RUN1 PE=1 SV=1	S	Function unknown	hypothetical protein PRUPE_8G056700 [Prunus persica]
PaF106G0100001708.01	1102	939	898	303	341	356	7.63229	7.78708	6.41876	2.28552	2.75711	2.46998	2.0833e-28	-1.42029	down	--	--	Molecular Function: protein binding (GO:0005515);;	K11649|3.6e-13|mtr:MTR_6g053260|K11649 SWI/SNF related-matrix-associated actin-dependent regulator of chromatin subfamily C | (RefSeq) F-box and associated interaction domain protein	--	--	--	F-box associated	F-box protein At3g07870 OS=Arabidopsis thaliana OX=3702 GN=At3g07870 PE=2 SV=1	S	Function unknown	PREDICTED: uncharacterized protein LOC103322958 [Prunus mume]
PaF106G0100000566.01	246	191	156	520	518	607	1.8332	1.70246	1.19227	4.21191	4.50089	4.52241	2.88985e-19	1.4817	up	[K]	Transcription	Biological Process: defense response (GO:0006952);; Molecular Function: ADP binding (GO:0043531);;	K13457|6.4e-105|qsu:112007111|K13457 disease resistance protein RPM1 | (RefSeq) disease resistance protein RPM1-like	Plant-pathogen interaction (ko04626)	[T]	Signal transduction mechanisms	NB-ARC domain	Putative disease resistance protein At1g50180 OS=Arabidopsis thaliana OX=3702 GN=At1g50180 PE=3 SV=2	T	Signal transduction mechanisms	PREDICTED: putative disease resistance protein At1g50180 isoform X1 [Prunus mume]
PaF106G0100004578.01	308	263	293	92	143	103	6.18728	6.30405	6.06368	2.00081	3.33877	2.06377	3.19728e-07	-1.13697	down	--	--	Molecular Function: transcription regulatory region sequence-specific DNA binding (GO:0000976);; Cellular Component: nucleus (GO:0005634);; Biological Process: regulation of transcription, DNA-templated (GO:0006355);;	K14491|1.6e-07|han:110883863|K14491 two-component response regulator ARR-B family | (RefSeq) two-component response regulator ARR1-like isoform X1	Plant hormone signal transduction (ko04075)	--	--	Myb-like DNA-binding domain	Probable transcription factor KAN4 OS=Arabidopsis thaliana OX=3702 GN=KAN4 PE=1 SV=1	K	Transcription	unnamed protein product [Prunus armeniaca]
PaF106G0100005775.01	119	104	64	1098	1009	837	1.91047	2.00325	1.05551	19.2667	18.9798	13.5108	5.3319e-57	3.18009	up	--	--	Cellular Component: integral component of membrane (GO:0016021);; Molecular Function: transmembrane transporter activity (GO:0022857);;	K17500|3.3e-52|nto:104085001|K17500 integrin-linked kinase-associated serine/threonine phosphatase 2C [EC:3.1.3.16] | (RefSeq) WAT1-related protein At3g18200 isoform X1	--	--	--	EamA-like transporter family	WAT1-related protein At1g21890 OS=Arabidopsis thaliana OX=3702 GN=At1g21890 PE=2 SV=1	S	Function unknown	unnamed protein product [Prunus armeniaca]
PaF106G0400017886.01	459	445	586	132	232	201	4.95551	5.74643	6.52582	1.55203	2.92354	2.17099	1.46812e-08	-1.19954	down	--	--	Molecular Function: catechol oxidase activity (GO:0004097);; Biological Process: pigment biosynthetic process (GO:0046148);; Molecular Function: metal ion binding (GO:0046872);;	K00422|0.0e+00|pmum:103324678|K00422 polyphenol oxidase [EC:1.10.3.1] | (RefSeq) polyphenol oxidase, chloroplastic-like	Tyrosine metabolism (ko00350);; Isoquinoline alkaloid biosynthesis (ko00950)	--	--	Protein of unknown function (DUF_B2219)	Polyphenol oxidase latent form, chloroplastic OS=Prunus armeniaca OX=36596 GN=PPO PE=1 SV=1	S	Function unknown	unnamed protein product [Prunus armeniaca]
PaF106G0200006845.01	10874	9920	11150	996	1144	2110	81.7115	86.7786	83.9818	8.15415	12.1085	16.1029	3.71219e-24	-2.49726	down	--	--	Molecular Function: oxidoreductase activity, acting on single donors with incorporation of molecular oxygen, incorporation of two atoms of oxygen (GO:0016702);; Biological Process: oxylipin biosynthetic process (GO:0031408);; Biological Process: lipid oxidation (GO:0034440);; Molecular Function: metal ion binding (GO:0046872);;	K00454|0.0e+00|pper:18787524|K00454 lipoxygenase [EC:1.13.11.12] | (RefSeq) linoleate 13S-lipoxygenase 2-1, chloroplastic	Linoleic acid metabolism (ko00591);; alpha-Linolenic acid metabolism (ko00592)	--	--	Lipoxygenase	Linoleate 13S-lipoxygenase 2-1, chloroplastic OS=Solanum tuberosum OX=4113 GN=LOX2.1 PE=1 SV=1	E	Amino acid transport and metabolism	linoleate 13S-lipoxygenase 2-1, chloroplastic [Prunus persica]
PaF106G0700029083.01	0	0	0	52	57	48	0	0	0	1.50299	1.75651	1.26385	1.21786e-15	2.98036	up	[I]	Lipid transport and metabolism	Molecular Function: 3-hydroxyisobutyryl-CoA hydrolase activity (GO:0003860);;	K05605|5.3e-41|pmum:103328923|K05605 3-hydroxyisobutyryl-CoA hydrolase [EC:3.1.2.4] | (RefSeq) 3-hydroxyisobutyryl-CoA hydrolase-like protein 5	Valine, leucine and isoleucine degradation (ko00280);; beta-Alanine metabolism (ko00410);; Propanoate metabolism (ko00640);; Carbon metabolism (ko01200)	--	--	Enoyl-CoA hydratase/isomerase	3-hydroxyisobutyryl-CoA hydrolase-like protein 5 OS=Arabidopsis thaliana OX=3702 GN=At1g06550 PE=1 SV=2	I	Lipid transport and metabolism	unnamed protein product [Prunus armeniaca]
PaF106G0100006312.01	92	81	49	0	4	2	1.12146	1.16957	0.61174	0	0.051507	0.01259	2.66654e-14	-2.77975	down	--	--	Molecular Function: UDP-glycosyltransferase activity (GO:0008194);; Cellular Component: intracellular membrane-bounded organelle (GO:0043231);;	K22845|3.9e-167|pper:18789761|K22845 phlorizin synthase [EC:2.4.1.357] | (RefSeq) UDP-glycosyltransferase 88F5	Flavonoid biosynthesis (ko00941)	[GC]	Carbohydrate transport and metabolism;; Energy production and conversion	--	UDP-glycosyltransferase 88F5 OS=Malus domestica OX=3750 GN=UGT88F5 PE=2 SV=1	--	--	unnamed protein product [Prunus armeniaca]
PaF106G0300012431.01	140	99	143	248	381	357	1.17558	0.998594	1.2297	2.35299	3.88559	3.04022	2.96205e-10	1.34244	up	[M]	Cell wall/membrane/envelope biogenesis	Molecular Function: protein kinase activity (GO:0004672);; Molecular Function: calcium ion binding (GO:0005509);; Molecular Function: ATP binding (GO:0005524);; Cellular Component: integral component of membrane (GO:0016021);; Molecular Function: polysaccharide binding (GO:0030247);;	K23544|3.1e-150|brp:103842861|K23544 serine incorporator 1/3 | (RefSeq) serine incorporator 3	--	--	--	Protein kinase domain	Wall-associated receptor kinase-like 3 OS=Arabidopsis thaliana OX=3702 GN=WAKL3 PE=2 SV=2	T	Signal transduction mechanisms	PREDICTED: wall-associated receptor kinase-like 3 [Prunus mume]
PaF106G0100006439.01	104	115	148	270	296	293	0.491349	0.646705	0.72255	1.39054	1.63703	1.38748	5.26231e-09	1.20993	up	[R]	General function prediction only	Biological Process: signal transduction (GO:0007165);; Molecular Function: ADP binding (GO:0043531);;	K00695|4.7e-93|mtr:MTR_6g478030|K00695 sucrose synthase [EC:2.4.1.13] | (RefSeq) sucrose synthase	Starch and sucrose metabolism (ko00500)	--	--	NB-ARC domain	TMV resistance protein N OS=Nicotiana glutinosa OX=35889 GN=N PE=1 SV=1	T	Signal transduction mechanisms	TMV resistance protein N isoform X7 [Prunus persica]
PaF106G0200007393.01	158	138	188	323	299	399	0.798343	0.830144	0.979384	1.77537	1.76424	2.0181	6.12298e-10	1.09355	up	[R]	General function prediction only	Molecular Function: ADP binding (GO:0043531);;	K12818|1.7e-199|mtr:MTR_0267s0070|K12818 ATP-dependent RNA helicase DHX8/PRP22 [EC:3.6.4.13] | (RefSeq) NB-ARC domain disease resistance protein, putative	Spliceosome (ko03040)	[T]	Signal transduction mechanisms	NB-ARC domain	Putative disease resistance RPP13-like protein 1 OS=Arabidopsis thaliana OX=3702 GN=RPPL1 PE=3 SV=1	T	Signal transduction mechanisms	PREDICTED: LOW QUALITY PROTEIN: putative disease resistance RPP13-like protein 1 [Prunus mume]
PaF106G0700026042.01	2645	1932	2509	769	673	770	24.1842	21.1075	23.4892	7.64581	7.36401	7.05926	1.8546e-50	-1.55099	down	[T]	Signal transduction mechanisms	Molecular Function: protein serine/threonine kinase activity (GO:0004674);; Molecular Function: ATP binding (GO:0005524);; Cellular Component: plasma membrane (GO:0005886);; Biological Process: carbohydrate metabolic process (GO:0005975);; Biological Process: protein phosphorylation (GO:0006468);; Molecular Function: chitin binding (GO:0008061);; Cellular Component: integral component of membrane…	K01183|1.9e-83|nsy:104241083|K01183 chitinase [EC:3.2.1.14] | (RefSeq) chitinase-3-like protein 2	Amino sugar and nucleotide sugar metabolism (ko00520)	--	--	Protein tyrosine and serine/threonine kinase	G-type lectin S-receptor-like serine/threonine-protein kinase At1g11330 OS=Arabidopsis thaliana OX=3702 GN=At1g11330 PE=1 SV=3	T	Signal transduction mechanisms	PREDICTED: cysteine-rich receptor-like protein kinase 5 isoform X1 [Prunus mume]
PaF106G0200009640.01	19	17	22	63	48	102	0.53959	0.577924	0.648706	2.00062	1.63429	2.99072	1.40658e-05	1.45731	up	--	--	Cellular Component: integral component of membrane (GO:0016021);;	K05391|8.7e-29|pmum:103332440|K05391 cyclic nucleotide gated channel, plant | (RefSeq) cyclic nucleotide-gated ion channel 1-like isoform X1	Plant-pathogen interaction (ko04626)	[PT]	Inorganic ion transport and metabolism;; Signal transduction mechanisms	--	Cyclic nucleotide-gated ion channel 1 OS=Arabidopsis thaliana OX=3702 GN=CNGC1 PE=1 SV=1	--	--	cyclic nucleotide gated channel 1, partial [Prunus dulcis]
PaF106G0200008741.01	22	22	6	54	39	79	0.252332	0.295993	0.066447	0.676948	0.52136	0.904613	0.00132404	1.21148	up	[QV]	Secondary metabolites biosynthesis, transport and catabolism;; Defense mechanisms	Molecular Function: monooxygenase activity (GO:0004497);; Molecular Function: iron ion binding (GO:0005506);; Cellular Component: integral component of membrane (GO:0016021);; Molecular Function: oxidoreductase activity, acting on paired donors, with incorporation or reduction of molecular oxygen (GO:0016705);; Molecular Function: heme binding (GO:0020037);;	K20495|5.8e-90|ppp:112291140|K20495 long-chain fatty acid omega-monooxygenase [EC:1.14.14.80] | (RefSeq) cytochrome P450 704B1-like	Fatty acid degradation (ko00071);; Cutin, suberine and wax biosynthesis (ko00073)	[QI]	Secondary metabolites biosynthesis, transport and catabolism;; Lipid transport and metabolism	Cytochrome P450	Cytochrome P450 704C1 OS=Pinus taeda OX=3352 GN=CYP704C1 PE=2 SV=1	Q	Secondary metabolites biosynthesis, transport and catabolism	unnamed protein product [Prunus armeniaca]
PaF106G0100004918.01	106	66	129	25	30	38	5.57169	4.10593	6.97342	1.3788	1.8075	1.98514	3.25602e-05	-1.28773	down	--	--	Cellular Component: extracellular region (GO:0005576);; Molecular Function: growth factor activity (GO:0008083);; Biological Process: cell proliferation (GO:0008283);;	--	--	--	--	Phytosulfokine precursor protein (PSK)	Phytosulfokines 3 OS=Arabidopsis thaliana OX=3702 GN=PSK3 PE=2 SV=2	S	Function unknown	unnamed protein product [Prunus armeniaca]
PaF106G0100004820.01	1455	1323	1383	653	497	771	17.6325	19.18	17.2878	8.60056	7.03022	9.34824	8.18795e-17	-1.01157	down	[M]	Cell wall/membrane/envelope biogenesis	Molecular Function: catalytic activity (GO:0003824);;	K06118|3.0e-284|pmum:103320566|K06118 UDP-sulfoquinovose synthase [EC:3.13.1.1] | (RefSeq) UDP-sulfoquinovose synthase, chloroplastic	Amino sugar and nucleotide sugar metabolism (ko00520);; Glycerolipid metabolism (ko00561)	[M]	Cell wall/membrane/envelope biogenesis	NAD dependent epimerase/dehydratase family	UDP-sulfoquinovose synthase, chloroplastic OS=Spinacia oleracea OX=3562 GN=SQD1 PE=1 SV=1	M	Cell wall/membrane/envelope biogenesis	unnamed protein product [Prunus armeniaca]
PaF106G0500020529.01	135	115	66	241	220	327	1.92403	1.95828	0.972163	3.7432	3.66583	4.66991	3.89086e-07	1.23685	up	--	--	Cellular Component: integral component of membrane (GO:0016021);;	--	--	--	--	--	--	S	Function unknown	PREDICTED: uncharacterized protein LOC103338356 isoform X1 [Prunus mume]
PaF106G0800031962.01	490	401	471	1783	1641	1637	8.80469	8.6289	8.73842	34.8968	34.4334	29.4705	9.40935e-62	1.93991	up	--	--	Molecular Function: calcium ion binding (GO:0005509);; Molecular Function: calcium-dependent phospholipid binding (GO:0005544);; Cellular Component: cytoplasm (GO:0005737);; Cellular Component: cytosol (GO:0005829);;	K17098|3.6e-177|pmum:103335925|K17098 annexin D | (RefSeq) annexin D2-like	--	[U]	Intracellular trafficking, secretion, and vesicular transport	Annexin	Annexin Gh1 (Fragment) OS=Gossypium hirsutum OX=3635 GN=AnnGh1 PE=1 SV=2	U	Intracellular trafficking, secretion, and vesicular transport	PREDICTED: annexin D2-like [Prunus mume]
PaF106G0200007412.01	76	56	69	22	14	7	1.18327	1.03801	1.09772	0.365409	0.238969	0.107078	4.91662e-05	-1.45834	down	--	--	Molecular Function: nucleic acid binding (GO:0003676);; Molecular Function: zinc ion binding (GO:0008270);; Biological Process: DNA integration (GO:0015074);;	K12393|6.5e-60|aof:109845736|K12393 AP-1 complex subunit mu | (RefSeq) LOW QUALITY PROTEIN: AP-1 complex subunit mu-2-like	--	[R]	General function prediction only	gag-polypeptide of LTR copia-type	Retrovirus-related Pol polyprotein from transposon TNT 1-94 OS=Nicotiana tabacum OX=4097 PE=2 SV=1	T	Signal transduction mechanisms	hypothetical protein C1H46_017140 [Malus baccata]
PaF106G0300012378.01	317	206	244	42	39	39	2.86296	2.23154	2.27493	0.409027	0.404457	0.346523	6.27902e-24	-2.30012	down	[M]	Cell wall/membrane/envelope biogenesis	Molecular Function: protein kinase activity (GO:0004672);; Molecular Function: calcium ion binding (GO:0005509);; Molecular Function: ATP binding (GO:0005524);; Cellular Component: integral component of membrane (GO:0016021);; Molecular Function: polysaccharide binding (GO:0030247);;	K23544|3.4e-149|brp:103842861|K23544 serine incorporator 1/3 | (RefSeq) serine incorporator 3	--	--	--	Protein kinase domain	Wall-associated receptor kinase-like 2 OS=Arabidopsis thaliana OX=3702 GN=WAKL2 PE=2 SV=1	T	Signal transduction mechanisms	PREDICTED: wall-associated receptor kinase-like 1 [Prunus mume]
PaF106G0200010593.01	26	5	15	106	96	160	0.620203	0.125423	0.362998	2.76275	2.67446	3.84926	1.65908e-12	2.29814	up	--	--	Biological Process: microtubule cytoskeleton organization (GO:0000226);; Biological Process: mitotic cell cycle (GO:0000278);; Biological Process: nuclear division (GO:0000280);; Biological Process: mitotic cytokinesis (GO:0000281);; Biological Process: cytokinesis (GO:0000910);; Biological Process: microtubule bundle formation (GO:0001578);; Molecular Function: molecular_function (GO:0003674);; …	K03231|8.0e-22|mtr:MTR_1g101870|K03231 elongation factor 1-alpha | (RefSeq) elongation factor 1-alpha	RNA transport (ko03013)	[O]	Posttranslational modification, protein turnover, chaperones	ATPase family associated with various cellular activities (AAA)	Protein SUPPRESSOR OF K(+) TRANSPORT GROWTH DEFECT 1 OS=Arabidopsis thaliana OX=3702 GN=SKD1 PE=1 SV=1	O	Posttranslational modification, protein turnover, chaperones	hypothetical protein C3L33_16386, partial [Rhododendron williamsianum]
PaF106G0700027731.01	103	86	92	26	9	42	1.37374	1.361	1.26252	0.376136	0.125874	0.557046	8.2363e-05	-1.34897	down	[Q]	Secondary metabolites biosynthesis, transport and catabolism	Molecular Function: diacylglycerol O-acyltransferase activity (GO:0004144);; Cellular Component: plasma membrane (GO:0005886);; Biological Process: triglyceride biosynthetic process (GO:0019432);; Molecular Function: long-chain-alcohol O-fatty-acyltransferase activity (GO:0047196);;	K20098|7.3e-62|mtr:MTR_4g078460|K20098 DNA excision repair protein ERCC-6-like 2 [EC:3.6.4.-] | (RefSeq) DNA repair and recombination RAD26-like protein, putative	--	--	--	WS/DGAT C-terminal domain	--	S	Function unknown	PREDICTED: O-acyltransferase WSD1-like [Prunus mume]
PaF106G0600025315.01	484	537	605	220	209	293	20.7671	27.5681	26.8055	10.2654	10.4403	12.577	5.0778e-10	-1.04454	down	[O]	Posttranslational modification, protein turnover, chaperones	Biological Process: response to cyclopentenone (GO:0010583);;	K09510|2.7e-11|nau:109209100|K09510 DnaJ homolog subfamily B member 4 | (RefSeq) dnaJ homolog subfamily B member 1-like	--	[O]	Posttranslational modification, protein turnover, chaperones	DnaJ domain	Chaperone protein dnaJ 16 OS=Arabidopsis thaliana OX=3702 GN=ATJ16 PE=2 SV=1	O	Posttranslational modification, protein turnover, chaperones	chaperone protein DnaJ isoform X1 [Prunus dulcis]
PaF106G0300011344.01	154	104	88	27	45	46	5.94989	4.78454	3.48698	1.12261	1.99687	1.77507	8.0476e-05	-1.19244	down	--	--	Cellular Component: integral component of membrane (GO:0016021);;	--	--	--	--	--	--	--	--	unnamed protein product [Prunus armeniaca]
PaF106G0200007822.01	703	609	669	332	258	282	20.2126	20.957	19.8446	10.3757	8.65124	8.10671	2.1955e-12	-1.04701	down	--	--	Cellular Component: mitochondrial matrix (GO:0005759);;	K15414|4.8e-17|hbr:110644040|K15414 complement component 1 Q subcomponent-binding protein, mitochondrial | (RefSeq) uncharacterized protein At2g39795, mitochondrial-like	--	[C]	Energy production and conversion	Mitochondrial glycoprotein	--	C	Energy production and conversion	mitochondrial acidic protein MAM33 [Prunus persica]
PaF106G0300012958.01	62	21	49	106	107	111	1.35344	0.538351	1.11732	2.53649	2.76267	2.4406	0.000214397	1.146	up	[O]	Posttranslational modification, protein turnover, chaperones	Molecular Function: cysteine-type endopeptidase activity (GO:0004197);; Cellular Component: integral component of membrane (GO:0016021);; Biological Process: CAAX-box protein processing (GO:0071586);;	K23336|3.3e-20|smo:SELMODRAFT_439598|K23336 armadillo repeat-containing protein 8 | (RefSeq) hypothetical protein	--	--	--	CPBP intramembrane metalloprotease	--	S	Function unknown	PREDICTED: uncharacterized protein LOC103343368 isoform X2 [Prunus mume]
PaF106G0500021285.01	125	103	100	32	22	37	3.10239	3.05297	2.56275	0.862535	0.627781	0.902283	2.49025e-07	-1.47607	down	--	--	Molecular Function: DNA binding (GO:0003677);;	K15777|2.7e-24|mesc:110630336|K15777 4,5-DOPA dioxygenase extradiol [EC:1.13.11.-] | (RefSeq) uncharacterized protein LOC110630336	Betalain biosynthesis (ko00965)	--	--	ZF-HD protein dimerisation region	Zinc-finger homeodomain protein 11 OS=Oryza sativa subsp. indica OX=39946 GN=ZHD11 PE=3 SV=1	S	Function unknown	unnamed protein product [Prunus armeniaca]
PaF106G0600024640.01	138	74	168	0	7	5	3.82974	2.44766	4.81151	0	0.2247	0.133809	1.59729e-19	-3.11992	down	[R]	General function prediction only	Molecular Function: molecular_function (GO:0003674);; Molecular Function: catalytic activity (GO:0003824);; Biological Process: cellular aldehyde metabolic process (GO:0006081);; Biological Process: organic acid metabolic process (GO:0006082);; Biological Process: lactate metabolic process (GO:0006089);; Biological Process: biological_process (GO:0008150);; Biological Process: metabolic process (…	K18881|8.7e-57|pavi:110765120|K18881 D-lactate dehydratase [EC:4.2.1.130] | (RefSeq) protein DJ-1 homolog D-like	Pyruvate metabolism (ko00620)	[RV]	General function prediction only;; Defense mechanisms	DJ-1/PfpI family	Protein DJ-1 homolog D OS=Arabidopsis thaliana OX=3702 GN=DJ1D PE=1 SV=1	V	Defense mechanisms	protein DJ-1 homolog D-like [Prunus dulcis]
PaF106G0600025153.01	4665	3361	5285	1842	1627	2014	122.522	105.652	143.183	52.6346	49.8747	52.9525	1.59511e-22	-1.15501	down	--	--	Cellular Component: integral component of membrane (GO:0016021);;	--	--	--	--	--	--	--	--	Low temperature and salt responsive protein family [Prunus dulcis]
PaF106G0600023306.01	79	35	59	161	168	217	1.10561	0.632745	1.0927	3.55735	4.32202	3.43856	1.20404e-09	1.53812	up	--	--	Molecular Function: ATP transmembrane transporter activity (GO:0005347);; Cellular Component: integral component of membrane (GO:0016021);;	K14684|1.0e-70|pmum:103320617|K14684 solute carrier family 25 (mitochondrial phosphate transporter), member 23/24/25/41 | (RefSeq) LOW QUALITY PROTEIN: mitochondrial substrate carrier family protein B-like	--	[C]	Energy production and conversion	Mitochondrial carrier protein	Mitochondrial adenine nucleotide transporter ADNT1 OS=Arabidopsis thaliana OX=3702 GN=ADNT1 PE=1 SV=1	C	Energy production and conversion	unnamed protein product [Prunus armeniaca]
PaF106G0600021864.01	27	16	27	58	64	52	0.805792	0.54858	0.838525	1.87504	2.25274	1.56275	0.00171054	1.07714	up	[O]	Posttranslational modification, protein turnover, chaperones	Molecular Function: metalloendopeptidase activity (GO:0004222);; Molecular Function: metal ion binding (GO:0046872);;	K01411|2.9e-38|pper:18772714|K01411 nardilysin [EC:3.4.24.61] | (RefSeq) nardilysin-like	--	[O]	Posttranslational modification, protein turnover, chaperones	--	Nardilysin-like OS=Arabidopsis thaliana OX=3702 GN=At1g06900 PE=2 SV=1	O	Posttranslational modification, protein turnover, chaperones	unnamed protein product [Prunus armeniaca]
PaF106G0400015715.01	187	88	152	19	10	8	3.59536	2.02336	3.0002	0.391112	0.222445	0.137674	1.41433e-15	-2.55244	down	--	--	Cellular Component: integral component of membrane (GO:0016021);;	K19041|7.7e-42|ccaj:109811263|K19041 E3 ubiquitin-protein ligase RNF38/44 [EC:2.3.2.27] | (RefSeq) NEP1-interacting protein-like 1	--	[O]	Posttranslational modification, protein turnover, chaperones	Ring finger domain	NEP1-interacting protein 1 OS=Arabidopsis thaliana OX=3702 GN=NIP1 PE=1 SV=2	O	Posttranslational modification, protein turnover, chaperones	unnamed protein product [Prunus armeniaca]
PaF106G0100001268.01	155	168	173	372	521	501	1.52563	2.08406	1.84554	4.20221	6.12585	4.95617	2.80206e-15	1.47253	up	--	--	Biological Process: response to acid chemical (GO:0001101);; Molecular Function: molecular_function (GO:0003674);; Molecular Function: catalytic activity (GO:0003824);; Molecular Function: thiol-dependent ubiquitin-specific protease activity (GO:0004843);; Molecular Function: protein binding (GO:0005515);; Cellular Component: cellular_component (GO:0005575);; Cellular Component: intracellular (GO…	K11838|8.7e-21|pda:103720599|K11838 ubiquitin carboxyl-terminal hydrolase 7 [EC:3.4.19.12] | (RefSeq) ubiquitin carboxyl-terminal hydrolase 12-like isoform X1	--	[DR]	Cell cycle control, cell division, chromosome partitioning;; General function prediction only	MATH domain	MATH domain and coiled-coil domain-containing protein At3g58210 OS=Arabidopsis thaliana OX=3702 GN=At3g58210 PE=4 SV=1	D	Cell cycle control, cell division, chromosome partitioning	uncharacterized protein LOC18793764 [Prunus persica]
PaF106G0400016068.01	2616	2135	2418	856	827	910	44.2163	43.1897	42.1569	15.7402	16.308	15.3903	5.3318e-54	-1.35536	down	[I]	Lipid transport and metabolism	Molecular Function: 3-hydroxyacyl-CoA dehydrogenase activity (GO:0003857);; Biological Process: fatty acid metabolic process (GO:0006631);; Molecular Function: NAD+ binding (GO:0070403);;	K00074|6.7e-165|pmum:103326052|K00074 3-hydroxybutyryl-CoA dehydrogenase [EC:1.1.1.157] | (RefSeq) 3-hydroxybutyryl-CoA dehydrogenase	Phenylalanine metabolism (ko00360);; Butanoate metabolism (ko00650);; Carbon metabolism (ko01200)	[I]	Lipid transport and metabolism	3-hydroxyacyl-CoA dehydrogenase, NAD binding domain	--	I	Lipid transport and metabolism	unnamed protein product [Prunus armeniaca]
PaF106G0200008874.01	1412	1086	1289	308	283	303	23.742	22.4129	22.4083	5.62004	5.22563	4.72417	7.48635e-62	-1.9357	down	[U]	Intracellular trafficking, secretion, and vesicular transport	Molecular Function: GTPase activity (GO:0003924);; Molecular Function: signal recognition particle binding (GO:0005047);; Molecular Function: GTP binding (GO:0005525);; Biological Process: protein targeting (GO:0006605);; Biological Process: SRP-dependent cotranslational protein targeting to membrane (GO:0006614);; Cellular Component: membrane (GO:0016020);;	K03110|5.0e-199|pmum:103331861|K03110 fused signal recognition particle receptor | (RefSeq) cell division protein FtsY homolog, chloroplastic	Protein export (ko03060)	[U]	Intracellular trafficking, secretion, and vesicular transport	SRP54-type protein, GTPase domain	Cell division protein FtsY homolog, chloroplastic OS=Arabidopsis thaliana OX=3702 GN=CPFTSY PE=1 SV=2	U	Intracellular trafficking, secretion, and vesicular transport	unnamed protein product [Prunus armeniaca]
PaF106G0800032780.01	69	56	66	173	109	155	1.78594	1.71038	1.76045	4.86489	3.28711	4.01227	1.07614e-05	1.12494	up	--	--	Cellular Component: integral component of membrane (GO:0016021);;	--	--	--	--	--	--	--	--	uncharacterized protein LOC117612936 isoform X2 [Prunus dulcis]
PaF106G0200010775.01	242	183	151	331	597	486	3.86114	3.49367	2.47849	5.74608	11.1263	7.76585	2.54057e-08	1.26353	up	[Q]	Secondary metabolites biosynthesis, transport and catabolism	Molecular Function: metal ion binding (GO:0046872);; Molecular Function: dioxygenase activity (GO:0051213);;	K24028|4.5e-194|pavi:110749563|K24028 salicylic acid 3-hydroxylase [EC:1.14.11.-] | (RefSeq) protein DOWNY MILDEW RESISTANCE 6	--	[QR]	Secondary metabolites biosynthesis, transport and catabolism;; General function prediction only	2OG-Fe(II) oxygenase superfamily	Protein DOWNY MILDEW RESISTANCE 6 OS=Arabidopsis thaliana OX=3702 GN=DMR6 PE=1 SV=1	Q	Secondary metabolites biosynthesis, transport and catabolism	unnamed protein product [Prunus armeniaca]
Prunus_sibirica_newGene_1378	204	266	187	0	0	0	2.41333	3.75902	2.28209	0	0	0	1.18461e-47	-4.79035	down	[O]	Posttranslational modification, protein turnover, chaperones	Molecular Function: ATP binding (GO:0005524);;	K03283|1.4e-237|pmum:103341773|K03283 heat shock 70kDa protein 1/2/6/8 | (RefSeq) heat shock cognate 70 kDa protein-like	Spliceosome (ko03040);; Protein processing in endoplasmic reticulum (ko04141);; Endocytosis (ko04144)	[O]	Posttranslational modification, protein turnover, chaperones	Hsp70 protein	Heat shock 70 kDa protein 18 OS=Arabidopsis thaliana OX=3702 GN=HSP70-18 PE=2 SV=1	O	Posttranslational modification, protein turnover, chaperones	PREDICTED: heat shock cognate 70 kDa protein-like [Prunus mume]
PaF106G0800031023.01	92	45	57	268	388	435	1.28159	0.736536	0.820376	4.06113	6.3183	6.06537	6.66123e-24	2.31468	up	[G]	Carbohydrate transport and metabolism	Molecular Function: UDP-glycosyltransferase activity (GO:0008194);;	K23260|2.4e-281|pmum:103335255|K23260 scopoletin glucosyltransferase [EC:2.4.1.128] | (RefSeq) scopoletin glucosyltransferase-like	Phenylpropanoid biosynthesis (ko00940)	[GC]	Carbohydrate transport and metabolism;; Energy production and conversion	UDP-glucoronosyl and UDP-glucosyl transferase	Scopoletin glucosyltransferase OS=Nicotiana tabacum OX=4097 GN=TOGT1 PE=1 SV=1	--	--	unnamed protein product [Prunus armeniaca]
PaF106G0100006049.01	5	0	0	65	51	55	0.068814	0	0	0.968432	0.813506	0.761675	1.79378e-12	2.62641	up	[G]	Carbohydrate transport and metabolism	Molecular Function: hydrolase activity, hydrolyzing O-glycosyl compounds (GO:0004553);; Biological Process: carbohydrate metabolic process (GO:0005975);;	K01188|3.7e-63|fve:101292823|K01188 beta-glucosidase [EC:3.2.1.21] | (RefSeq) beta-glucosidase 24-like	Cyanoamino acid metabolism (ko00460);; Starch and sucrose metabolism (ko00500);; Phenylpropanoid biosynthesis (ko00940)	[G]	Carbohydrate transport and metabolism	Glycosyl hydrolase family 1	Beta-glucosidase 24 OS=Oryza sativa subsp. japonica OX=39947 GN=BGLU24 PE=2 SV=1	G	Carbohydrate transport and metabolism	beta-glucosidase 24-like [Prunus avium]
PaF106G0400016306.01	3	5	6	115	105	103	0.097988	0.238829	0.24825	5.60679	5.47553	4.59719	2.30139e-23	3.23962	up	--	--	Cellular Component: integral component of membrane (GO:0016021);;	--	--	--	--	--	--	--	--	unnamed protein product [Prunus armeniaca]
PaF106G0500019143.01	6	0	0	66	91	120	0.134381	0	0	1.71441	2.55491	2.88266	2.36424e-19	3.19818	up	--	--	Molecular Function: nucleic acid binding (GO:0003676);; Molecular Function: zinc ion binding (GO:0008270);; Biological Process: DNA integration (GO:0015074);;	--	--	--	--	--	--	S	Function unknown	uncharacterized protein LOC117620970 [Prunus dulcis]
PaF106G0500020376.01	467	328	324	131	132	204	2.72729	2.29271	1.94726	0.828741	0.898765	1.18961	1.69405e-08	-1.09802	down	[L]	Replication, recombination and repair	Molecular Function: DNA binding (GO:0003677);; Molecular Function: DNA-directed DNA polymerase activity (GO:0003887);; Molecular Function: ATP binding (GO:0005524);; Biological Process: DNA replication (GO:0006260);; Cellular Component: DNA polymerase III complex (GO:0009360);;	K10756|5.3e-12|ota:OT_ostta02g00555|K10756 replication factor C subunit 3/5 | (RefSeq) P-loop containing nucleoside triphosphate hydrolase	DNA replication (ko03030);; Nucleotide excision repair (ko03420);; Mismatch repair (ko03430)	[L]	Replication, recombination and repair	DNA polymerase III, delta subunit	Protein STICHEL-like 2 OS=Arabidopsis thaliana OX=3702 GN=At4g24790 PE=3 SV=1	L	Replication, recombination and repair	unnamed protein product [Prunus armeniaca]
PaF106G0300013739.01	100	73	84	152	158	237	1.84976	1.61025	1.60221	3.08384	3.43972	4.41028	4.14295e-06	1.05664	up	[Q]	Secondary metabolites biosynthesis, transport and catabolism	Molecular Function: oxidoreductase activity (GO:0016491);; Molecular Function: metal ion binding (GO:0046872);;	K04124|1.7e-218|pavi:110760088|K04124 gibberellin 3beta-dioxygenase [EC:1.14.11.15] | (RefSeq) gibberellin 3-beta-dioxygenase 1	Diterpenoid biosynthesis (ko00904)	[QR]	Secondary metabolites biosynthesis, transport and catabolism;; General function prediction only	2OG-Fe(II) oxygenase superfamily	Gibberellin 3-beta-dioxygenase 1 OS=Pisum sativum OX=3888 GN=LE PE=1 SV=1	Q	Secondary metabolites biosynthesis, transport and catabolism	unnamed protein product [Prunus armeniaca]
PaF106G0600022647.01	121	84	121	48	21	16	1.58499	1.31073	1.62271	0.675073	0.317072	0.198846	6.68208e-05	-1.35775	down	[P]	Inorganic ion transport and metabolism	Cellular Component: plasma membrane (GO:0005886);; Cellular Component: plant-type vacuole membrane (GO:0009705);; Molecular Function: nitrate transmembrane transporter activity (GO:0015112);; Biological Process: nitrate transport (GO:0015706);; Cellular Component: integral component of membrane (GO:0016021);; Biological Process: cellular response to nitrate (GO:0071249);;	K02575|1.5e-305|pmum:103325807|K02575 MFS transporter, NNP family, nitrate/nitrite transporter | (RefSeq) high-affinity nitrate transporter 2.1-like	Nitrogen metabolism (ko00910)	--	--	Major Facilitator Superfamily	High-affinity nitrate transporter 2.1 OS=Arabidopsis thaliana OX=3702 GN=NRT2.1 PE=1 SV=1	P	Inorganic ion transport and metabolism	unnamed protein product [Prunus armeniaca]
PaF106G0400016382.01	107	82	157	17	55	41	1.90463	1.75546	2.90642	0.328477	1.16432	0.72807	0.000961549	-1.13535	down	--	--	Cellular Component: Golgi apparatus (GO:0005794);; Molecular Function: O-acetyltransferase activity (GO:0016413);;	K23877|9.5e-41|psom:113319599|K23877 xyloglucan O-acetyltransferase | (RefSeq) protein ALTERED XYLOGLUCAN 4-like isoform X1	--	--	--	GDSL/SGNH-like Acyl-Esterase family found in Pmr5 and Cas1p	Protein trichome birefringence-like 43 OS=Arabidopsis thaliana OX=3702 GN=TBL43 PE=2 SV=1	S	Function unknown	unnamed protein product [Prunus armeniaca]
PaF106G0500018911.01	454	375	506	25	39	61	10.9803	10.8658	12.64	0.647916	1.09329	1.47644	1.32086e-42	-3.00566	down	--	--	Biological Process: protein polyubiquitination (GO:0000209);; Cellular Component: nucleus (GO:0005634);; Cellular Component: endoplasmic reticulum (GO:0005783);; Molecular Function: ubiquitin conjugating enzyme activity (GO:0061631);;	K10578|4.7e-116|pmum:103336879|K10578 ubiquitin-conjugating enzyme E2 J1 [EC:2.3.2.23] | (RefSeq) ubiquitin-conjugating enzyme E2 32-like isoform X1	Ubiquitin mediated proteolysis (ko04120);; Protein processing in endoplasmic reticulum (ko04141)	[O]	Posttranslational modification, protein turnover, chaperones	Ubiquitin-conjugating enzyme	Ubiquitin-conjugating enzyme E2 32 OS=Arabidopsis thaliana OX=3702 GN=UBC32 PE=2 SV=1	O	Posttranslational modification, protein turnover, chaperones	PREDICTED: ubiquitin-conjugating enzyme E2 32-like isoform X1 [Prunus mume]
PaF106G0300012326.01	90	47	44	178	148	209	1.11913	0.88889	0.432974	3.21169	1.65494	3.39445	3.52142e-08	1.4394	up	--	--	Molecular Function: UDP-glycosyltransferase activity (GO:0008194);;	K23452|1.1e-149|eus:EUTSA_v10009957mg|K23452 UDP-glucosyltransferase 85A [EC:2.4.1.-] | (RefSeq) hypothetical protein	Zeatin biosynthesis (ko00908)	[GC]	Carbohydrate transport and metabolism;; Energy production and conversion	UDP-glucoronosyl and UDP-glucosyl transferase	7-deoxyloganetin glucosyltransferase OS=Catharanthus roseus OX=4058 GN=UGT85A23 PE=1 SV=1	--	--	UDP-glucosyl transferase 85A2, partial [Prunus dulcis]
PaF106G0800031474.01	77	59	78	28	14	19	1.10787	1.01383	1.16567	0.432282	0.223956	0.265381	0.000112088	-1.29854	down	[MDT]	Cell wall/membrane/envelope biogenesis;; Cell cycle control, cell division, chromosome partitioning;; Signal transduction mechanisms	Molecular Function: ATP binding (GO:0005524);;	K08900|1.1e-156|jre:108986998|K08900 mitochondrial chaperone BCS1 | (RefSeq) AAA-ATPase At3g50940-like	--	[O]	Posttranslational modification, protein turnover, chaperones	ATPase family associated with various cellular activities (AAA)	Protein HYPER-SENSITIVITY-RELATED 4 OS=Arabidopsis thaliana OX=3702 GN=HSR4 PE=2 SV=1	O	Posttranslational modification, protein turnover, chaperones	unnamed protein product [Prunus armeniaca]
PaF106G0500020819.01	157	180	192	432	396	501	4.09962	5.61129	5.16855	12.2921	12.0922	13.1086	2.1481e-15	1.33163	up	[T]	Signal transduction mechanisms	Biological Process: phosphorelay signal transduction system (GO:0000160);;	K12127|7.9e-37|hbr:110635669|K12127 pseudo-response regulator 1 | (RefSeq) two-component response regulator-like APRR1	Circadian rhythm - plant (ko04712)	[K]	Transcription	Response regulator receiver domain	Two-component response regulator-like APRR1 OS=Arabidopsis thaliana OX=3702 GN=APRR1 PE=1 SV=1	K	Transcription	unnamed protein product [Prunus armeniaca]
PaF106G0600024436.01	34	13	16	75	69	92	4.19726	1.83489	2.07804	10.2745	10.1001	11.6563	4.13426e-06	1.52493	up	--	--	Cellular Component: integral component of membrane (GO:0016021);;	K00784|9.9e-11|mcha:111016700|K00784 ribonuclease Z [EC:3.1.26.11] | (RefSeq) tRNase Z TRZ3, mitochondrial isoform X1	RNA transport (ko03013)	[R]	General function prediction only	--	tRNAse Z TRZ4, mitochondrial OS=Arabidopsis thaliana OX=3702 GN=TRZ4 PE=2 SV=1	S	Function unknown	hypothetical protein PRUPE_7G044400 [Prunus persica]
PaF106G0100003842.01	10120	10069	11183	3931	3164	3868	144.634	172.262	164.809	61.2946	52.6386	55.5266	1.43583e-46	-1.40813	down	[H]	Coenzyme transport and metabolism	Molecular Function: nicotinate-nucleotide diphosphorylase (carboxylating) activity (GO:0004514);; Biological Process: NAD biosynthetic process (GO:0009435);;	K00767|1.1e-110|pavi:110765461|K00767 nicotinate-nucleotide pyrophosphorylase (carboxylating) [EC:2.4.2.19] | (RefSeq) nicotinate-nucleotide pyrophosphorylase [carboxylating], chloroplastic	Nicotinate and nicotinamide metabolism (ko00760)	[F]	Nucleotide transport and metabolism	Quinolinate phosphoribosyl transferase, N-terminal domain	Nicotinate-nucleotide pyrophosphorylase [carboxylating], chloroplastic OS=Arabidopsis thaliana OX=3702 GN=QPT PE=2 SV=2	F	Nucleotide transport and metabolism	unnamed protein product [Prunus armeniaca]
PaF106G0100003434.01	231	181	264	409	456	522	3.81232	3.56703	4.69457	8.04014	9.14175	8.87703	5.69533e-11	1.07246	up	--	--	Biological Process: signal transduction (GO:0007165);;	--	--	--	--	Putative nuclear localisation signal	Ninja-family protein AFP2 OS=Arabidopsis thaliana OX=3702 GN=AFP2 PE=1 SV=1	S	Function unknown	hypothetical protein PRUPE_1G288000 [Prunus persica]
PaF106G0200008854.01	589	450	511	1259	780	1117	5.90759	5.40048	5.28501	13.7553	9.14186	11.2261	9.14931e-12	1.06656	up	[H]	Coenzyme transport and metabolism	Molecular Function: methyltransferase activity (GO:0008168);; Cellular Component: integral component of membrane (GO:0016021);; Biological Process: methylation (GO:0032259);;	K23872|2.6e-142|gra:105802655|K23872 putative homogalacturonan methyltransferase [EC:2.1.1.-] | (RefSeq) probable methyltransferase PMT13	--	--	--	Putative S-adenosyl-L-methionine-dependent methyltransferase	Probable methyltransferase PMT15 OS=Arabidopsis thaliana OX=3702 GN=At4g00750 PE=2 SV=1	S	Function unknown	unnamed protein product [Prunus armeniaca]
PaF106G0600025477.01	137	78	147	10	16	15	1.51684	1.01805	1.65797	0.111373	0.192173	0.157664	8.00831e-14	-2.33757	down	--	--	Molecular Function: GDP-dissociation inhibitor activity (GO:0005092);; Biological Process: small GTPase mediated signal transduction (GO:0007264);; Molecular Function: transferase activity (GO:0016740);;	K23460|2.6e-61|pmum:103322360|K23460 Rab proteins geranylgeranyltransferase component A | (RefSeq) rab proteins geranylgeranyltransferase component A 1-like	--	[TU]	Signal transduction mechanisms;; Intracellular trafficking, secretion, and vesicular transport	GDP dissociation inhibitor	Rab escort protein 1 OS=Arabidopsis thaliana OX=3702 GN=REP PE=1 SV=2	O	Posttranslational modification, protein turnover, chaperones	rab escort protein 1-like isoform X2 [Prunus avium]
PaF106G0500019685.01	38	21	32	106	69	70	0.532548	0.521149	0.787217	1.82743	1.29366	1.20377	0.000189717	1.2091	up	[H]	Coenzyme transport and metabolism	Molecular Function: glutamate-cysteine ligase activity (GO:0004357);; Molecular Function: ATP binding (GO:0005524);; Biological Process: glutathione biosynthetic process (GO:0006750);; Cellular Component: chloroplast (GO:0009507);;	K01919|2.3e-287|pper:18777994|K01919 glutamate--cysteine ligase [EC:6.3.2.2] | (RefSeq) glutamate--cysteine ligase, chloroplastic	Cysteine and methionine metabolism (ko00270);; Glutathione metabolism (ko00480)	--	--	Glutamate-cysteine ligase family 2(GCS2)	Glutamate--cysteine ligase, chloroplastic OS=Nicotiana tabacum OX=4097 GN=GSH1 PE=2 SV=2	H	Coenzyme transport and metabolism	unnamed protein product [Prunus armeniaca]
PaF106G0800031885.01	823	621	798	348	294	368	19.1794	17.2944	19.1664	8.80555	7.97941	8.57879	5.64985e-15	-1.02588	down	--	--	Cellular Component: vacuolar membrane (GO:0005774);; Cellular Component: integral component of membrane (GO:0016021);;	--	--	--	--	--	--	S	Function unknown	PREDICTED: uncharacterized protein LOC103335877 [Prunus mume]
PaF106G0800030791.01	38	37	24	83	75	79	0.793526	0.864692	0.507618	1.70072	1.64197	1.58597	0.000534069	1.08559	up	--	--	Molecular Function: protein kinase activity (GO:0004672);; Molecular Function: ATP binding (GO:0005524);;	K23544|5.2e-27|brp:103842861|K23544 serine incorporator 1/3 | (RefSeq) serine incorporator 3	--	[T]	Signal transduction mechanisms	Protein tyrosine and serine/threonine kinase	Serine/threonine-protein kinase ZRK1 OS=Arabidopsis thaliana OX=3702 GN=ZRK1 PE=1 SV=1	T	Signal transduction mechanisms	unnamed protein product [Prunus armeniaca]
PaF106G0100001343.01	472	424	397	644	939	1071	6.51337	7.00318	5.64206	9.67094	15.1218	14.8047	1.12205e-10	1.06306	up	--	--	Molecular Function: transcription factor activity, sequence-specific DNA binding (GO:0003700);; Cellular Component: nucleus (GO:0005634);; Molecular Function: sequence-specific DNA binding (GO:0043565);;	K12835|1.1e-37|cmax:111493042|K12835 ATP-dependent RNA helicase DDX42 [EC:3.6.4.13] | (RefSeq) DEAD-box ATP-dependent RNA helicase 24 isoform X1	Spliceosome (ko03040)	--	--	WRKY DNA -binding domain	Probable WRKY transcription factor 48 OS=Arabidopsis thaliana OX=3702 GN=WRKY48 PE=2 SV=1	K	Transcription	unnamed protein product [Prunus armeniaca]
PaF106G0800032083.01	20	23	22	874	978	1156	0.182174	0.246933	0.20298	8.80684	10.5724	10.7217	6.22247e-160	5.15838	up	--	--	Molecular Function: protein binding (GO:0005515);;	--	--	--	--	Leucine rich repeat	--	T	Signal transduction mechanisms	PREDICTED: leucine-rich repeat receptor protein kinase EMS1-like [Prunus mume]
PaF106G0100000860.01	143	312	229	406	520	518	2.8218	7.37958	4.66607	8.73021	12.0021	10.2641	8.32625e-05	1.00027	up	--	--	Molecular Function: DNA binding (GO:0003677);; Molecular Function: protein dimerization activity (GO:0046983);;	K13422|5.5e-12|dct:110116479|K13422 transcription factor MYC2 | (RefSeq) transcription factor MYC2	MAPK signaling pathway - plant (ko04016);; Plant hormone signal transduction (ko04075)	--	--	Helix-loop-helix DNA-binding domain	Transcription factor bHLH35 OS=Arabidopsis thaliana OX=3702 GN=BHLH35 PE=2 SV=1	K	Transcription	PREDICTED: transcription factor bHLH35 [Prunus mume]
PaF106G0400017290.01	162	99	118	20	25	8	2.10534	1.53916	1.57944	0.270558	0.379659	0.09282	3.90882e-10	-2.03608	down	[E]	Amino acid transport and metabolism	Biological Process: cellular amino acid metabolic process (GO:0006520);; Molecular Function: carboxy-lyase activity (GO:0016831);; Molecular Function: pyridoxal phosphate binding (GO:0030170);;	K01593|1.6e-307|pavi:110755508|K01593 aromatic-L-amino-acid/L-tryptophan decarboxylase [EC:4.1.1.28 4.1.1.105] | (RefSeq) tyrosine/DOPA decarboxylase 1-like	Tyrosine metabolism (ko00350);; Phenylalanine metabolism (ko00360);; Tryptophan metabolism (ko00380);; Isoquinoline alkaloid biosynthesis (ko00950);; Betalain biosynthesis (ko00965)	[E]	Amino acid transport and metabolism	Pyridoxal-dependent decarboxylase conserved domain	Phenylacetaldehyde synthase OS=Rosa hybrid cultivar OX=128735 GN=PAAS PE=1 SV=1	E	Amino acid transport and metabolism	unnamed protein product [Prunus armeniaca]
PaF106G0200008171.01	3	0	0	181	178	127	0.01894	0	0	1.78698	1.89952	1.16217	9.08198e-38	4.28174	up	[ET]	Amino acid transport and metabolism;; Signal transduction mechanisms	Cellular Component: plasma membrane (GO:0005886);; Molecular Function: ligand-gated ion channel activity (GO:0015276);; Cellular Component: integral component of membrane (GO:0016021);; Molecular Function: signaling receptor activity (GO:0038023);;	K05387|1.0e-238|pavi:110769760|K05387 glutamate receptor, ionotropic, plant | (RefSeq) glutamate receptor 1.4-like	--	[PET]	Inorganic ion transport and metabolism;; Amino acid transport and metabolism;; Signal transduction mechanisms	Ligand-gated ion channel	Glutamate receptor 1.4 OS=Arabidopsis thaliana OX=3702 GN=GLR1.4 PE=2 SV=2	--	--	unnamed protein product [Prunus armeniaca]
Prunus_sibirica_newGene_862	16	5	14	77	43	86	0.158147	0.057789	0.136489	0.836226	0.498927	0.861973	2.57965e-07	1.82416	up	--	--	Molecular Function: kinase activity (GO:0016301);;	K03549|8.3e-154|qsu:111987200|K03549 KUP system potassium uptake protein | (RefSeq) LOW QUALITY PROTEIN: probable potassium transporter 17	--	[R]	General function prediction only	Reverse transcriptase (RNA-dependent DNA polymerase)	Retrovirus-related Pol polyprotein from transposon RE1 OS=Arabidopsis thaliana OX=3702 GN=RE1 PE=2 SV=1	L	Replication, recombination and repair	wall-associated kinase 2 [Prunus dulcis]
PaF106G0100006698.01	31	29	44	292	273	358	1.07381	1.18618	1.5709	11.1712	11.2149	12.6163	6.0462e-41	2.91316	up	--	--	Molecular Function: DNA binding (GO:0003677);; Cellular Component: nucleus (GO:0005634);;	--	--	--	--	B3 DNA binding domain	--	K	Transcription	uncharacterized protein LOC110765763 [Prunus avium]
Prunus_sibirica_newGene_1780	531	400	397	1354	1242	1048	4.77169	4.22343	3.59741	13.3123	13.014	9.3541	2.72053e-21	1.49222	up	[V]	Defense mechanisms	Molecular Function: ATP binding (GO:0005524);; Cellular Component: plasma membrane (GO:0005886);; Cellular Component: integral component of membrane (GO:0016021);; Molecular Function: ATPase activity (GO:0016887);; Molecular Function: ATPase activity, coupled to transmembrane movement of substances (GO:0042626);; Biological Process: transmembrane transport (GO:0055085);;	K08712|1.1e-65|gsl:Gasu_29800|K08712 ATP-binding cassette, subfamily G (WHITE), member 2, SNQ2 | (RefSeq) ABC transporter, ATP-binding protein	ABC transporters (ko02010)	[Q]	Secondary metabolites biosynthesis, transport and catabolism	ABC transporter	Pleiotropic drug resistance protein 1 OS=Nicotiana tabacum OX=4097 GN=PDR1 PE=2 SV=1	Q	Secondary metabolites biosynthesis, transport and catabolism	PREDICTED: pleiotropic drug resistance protein 1-like [Prunus mume]
Prunus_sibirica_newGene_813	91	48	53	12	16	19	2.55982	1.60863	1.54304	0.349437	0.5223	0.530597	6.62108e-05	-1.39467	down	--	--	Molecular Function: hydrolase activity (GO:0016787);;	--	--	--	--	--	--	J	Translation, ribosomal structure and biogenesis	unnamed protein product [Prunus armeniaca]
PaF106G0200010488.01	2138	1849	2399	1007	764	1063	67.0254	69.3755	77.5871	34.3489	27.9573	33.3693	1.89709e-19	-1.06092	down	--	--	Biological Process: metal ion transport (GO:0030001);; Molecular Function: metal ion binding (GO:0046872);;	K11883|8.4e-18|nau:109216591|K11883 RNA-binding protein NOB1 | (RefSeq) RNA-binding protein NOB1 isoform X1	Ribosome biogenesis in eukaryotes (ko03008)	[P]	Inorganic ion transport and metabolism	--	Heavy metal-associated isoprenylated plant protein 39 OS=Arabidopsis thaliana OX=3702 GN=HIPP39 PE=2 SV=1	P	Inorganic ion transport and metabolism	unnamed protein product [Prunus armeniaca]
PaF106G0800031051.01	689	533	624	1032	1186	1375	7.99616	7.40191	7.47337	13.0405	16.0652	15.9831	3.09178e-19	1.02493	up	[G]	Carbohydrate transport and metabolism	Biological Process: lipid metabolic process (GO:0006629);; Molecular Function: phosphoric diester hydrolase activity (GO:0008081);;	--	--	--	--	--	PI-PLC X domain-containing protein At5g67130 OS=Arabidopsis thaliana OX=3702 GN=At5g67130 PE=1 SV=1	S	Function unknown	unnamed protein product [Prunus armeniaca]
PaF106G0300011097.01	214	112	109	19	56	74	4.35568	2.72691	2.30407	0.439498	1.36442	1.4988	0.00113193	-1.10791	down	--	--	Cellular Component: integral component of membrane (GO:0016021);;	K12386|5.0e-154|pper:18783687|K12386 cystinosin | (RefSeq) cystinosin homolog	--	[E]	Amino acid transport and metabolism	PQ loop repeat	Cystinosin homolog OS=Arabidopsis thaliana OX=3702 GN=At5g40670 PE=2 SV=1	E	Amino acid transport and metabolism	unnamed protein product [Prunus armeniaca]
PaF106G0300012115.01	18971	10520	19751	4369	3546	4750	271.711	180.308	291.791	68.1053	59.2674	68.1102	3.55057e-35	-1.78443	down	--	--	Molecular Function: hydrolase activity, acting on ester bonds (GO:0016788);;	K10691|1.2e-34|ats:109762802|K10691 E3 ubiquitin-protein ligase UBR4 [EC:2.3.2.27] | (RefSeq) LOC109762802; auxin transport protein BIG	--	--	--	GDSL-like Lipase/Acylhydrolase	GDSL esterase/lipase At2g04570 OS=Arabidopsis thaliana OX=3702 GN=At2g04570 PE=2 SV=1	I	Lipid transport and metabolism	unnamed protein product [Prunus armeniaca]
PaF106G0200007275.01	376	325	278	112	104	190	3.6162	3.74425	2.75641	1.16614	1.16862	1.82769	2.45787e-07	-1.10312	down	--	--	Molecular Function: GTPase activity (GO:0003924);; Molecular Function: GTP binding (GO:0005525);; Cellular Component: cytoplasm (GO:0005737);; Molecular Function: microtubule binding (GO:0008017);; Cellular Component: membrane (GO:0016020);; Biological Process: organelle fission (GO:0048285);;	K17065|7.7e-42|ats:109745633|K17065 dynamin 1-like protein [EC:3.6.5.5] | (RefSeq) LOC109745633; dynamin-related protein 3A-like	--	[UR]	Intracellular trafficking, secretion, and vesicular transport;; General function prediction only	Dynamin central region	Dynamin-related protein 4C OS=Arabidopsis thaliana OX=3702 GN=DRP4C PE=2 SV=1	U	Intracellular trafficking, secretion, and vesicular transport	unnamed protein product [Prunus armeniaca]
PaF106G0600022625.01	752	775	488	190	123	159	2.80168	3.45876	1.87628	0.771192	0.534126	0.592199	1.13459e-18	-1.84366	down	--	--	Molecular Function: helicase activity (GO:0004386);; Biological Process: chromatin silencing (GO:0006342);;	K11643|4.1e-169|pxb:103947676|K11643 chromodomain-helicase-DNA-binding protein 4 [EC:3.6.4.12] | (RefSeq) uncharacterized protein LOC103947676 isoform X1	--	[K]	Transcription	--	Helicase protein MOM1 OS=Arabidopsis thaliana OX=3702 GN=MOM1 PE=1 SV=1	K	Transcription	unnamed protein product [Prunus armeniaca]
PaF106G0100005506.01	15	18	24	108	97	117	0.214493	0.304066	0.358905	1.73681	1.66684	1.73524	1.85065e-12	2.08303	up	--	--	Cellular Component: integral component of membrane (GO:0016021);; Molecular Function: transmembrane transporter activity (GO:0022857);;	K02940|1.5e-09|dzi:111289747|K02940 large subunit ribosomal protein L9e | (RefSeq) 60S ribosomal protein L9 isoform X1	Ribosome (ko03010)	--	--	EamA-like transporter family	WAT1-related protein At5g07050 OS=Arabidopsis thaliana OX=3702 GN=At5g07050 PE=2 SV=1	S	Function unknown	WAT1-related protein [Prunus yedoensis var. nudiflora]
PaF106G0700026433.01	392	361	202	108	126	159	6.75164	7.42527	3.57701	2.01875	2.51972	2.73141	1.4789e-05	-1.06997	down	[K]	Transcription	Molecular Function: GTPase activity (GO:0003924);; Molecular Function: GTP binding (GO:0005525);; Biological Process: small GTPase mediated signal transduction (GO:0007264);;	K04392|1.8e-116|pmum:103340893|K04392 Ras-related C3 botulinum toxin substrate 1 | (RefSeq) rac-like GTP-binding protein ARAC7	Phagosome (ko04145)	[R]	General function prediction only	Ras family	Rac-like GTP-binding protein ARAC7 OS=Arabidopsis thaliana OX=3702 GN=ARAC7 PE=1 SV=1	S	Function unknown	PREDICTED: rac-like GTP-binding protein ARAC7 [Prunus mume]
PaF106G0600024501.01	245	225	255	433	649	548	1.8934	1.84313	1.76898	3.17799	5.11438	3.70402	1.26723e-10	1.18607	up	[M]	Cell wall/membrane/envelope biogenesis	Molecular Function: protein serine/threonine kinase activity (GO:0004674);; Molecular Function: ATP binding (GO:0005524);; Cellular Component: integral component of membrane (GO:0016021);;	K20181|5.5e-110|mtr:MTR_5g026090|K20181 vacuolar protein sorting-associated protein 18 | (RefSeq) vacuolar sorting-associated-like protein	--	--	--	Protein kinase domain	Receptor kinase-like protein Xa21 OS=Oryza sativa subsp. indica OX=39946 GN=XA21 PE=1 SV=1	T	Signal transduction mechanisms	probable LRR receptor-like serine/threonine-protein kinase At3g47570 isoform X1 [Prunus avium]
PaF106G0400017978.01	51	13	29	98	103	115	0.40509	0.118269	0.241589	0.858665	0.96359	0.926923	7.31722e-06	1.45898	up	[T]	Signal transduction mechanisms	Molecular Function: protein serine/threonine kinase activity (GO:0004674);; Molecular Function: ATP binding (GO:0005524);; Cellular Component: plasma membrane (GO:0005886);; Biological Process: protein phosphorylation (GO:0006468);; Cellular Component: integral component of membrane (GO:0016021);; Biological Process: recognition of pollen (GO:0048544);;	K24104|1.4e-74|thj:104799061|K24104 GPN-loop GTPase | (RefSeq) LOW QUALITY PROTEIN: uncharacterized protein LOC104799061	--	--	--	Protein tyrosine and serine/threonine kinase	G-type lectin S-receptor-like serine/threonine-protein kinase At1g61500 OS=Arabidopsis thaliana OX=3702 GN=At1g61500 PE=2 SV=2	S	Function unknown	PREDICTED: G-type lectin S-receptor-like serine/threonine-protein kinase SD1-29 [Prunus mume]
PaF106G0700027781.01	974	722	961	2599	1964	2001	12.8702	11.4065	13.0898	37.3825	30.2959	26.4755	5.0449e-22	1.35753	up	[T]	Signal transduction mechanisms	Molecular Function: acid phosphatase activity (GO:0003993);; Molecular Function: metal ion binding (GO:0046872);;	K22390|5.4e-245|pmum:103339700|K22390 acid phosphatase type 7 | (RefSeq) purple acid phosphatase 22-like	--	[G]	Carbohydrate transport and metabolism	Purple acid Phosphatase, N-terminal domain	Purple acid phosphatase 22 OS=Arabidopsis thaliana OX=3702 GN=PAP22 PE=2 SV=1	G	Carbohydrate transport and metabolism	unnamed protein product [Prunus armeniaca]
PaF106G0600024632.01	25	28	22	104	107	158	0.233281	0.303235	0.211965	1.05945	1.165	1.47818	4.00137e-12	1.96353	up	[T]	Signal transduction mechanisms	Molecular Function: protein kinase activity (GO:0004672);; Molecular Function: ATP binding (GO:0005524);; Cellular Component: integral component of membrane (GO:0016021);; Molecular Function: carbohydrate binding (GO:0030246);;	K22133|2.3e-72|egr:104443803|K22133 oxalate---CoA ligase [EC:6.2.1.8] | (RefSeq) oxalate--CoA ligase isoform X2	Glyoxylate and dicarboxylate metabolism (ko00630)	--	--	Legume lectin domain	L-type lectin-domain containing receptor kinase IV.1 OS=Arabidopsis thaliana OX=3702 GN=LECRK41 PE=2 SV=1	T	Signal transduction mechanisms	PREDICTED: L-type lectin-domain containing receptor kinase IV.1-like [Prunus mume]
PaF106G0800032454.01	71	68	43	8	9	9	0.718534	0.81941	0.449696	0.078609	0.103262	0.090474	2.43821e-07	-1.84069	down	[R]	General function prediction only	Biological Process: signal transduction (GO:0007165);; Molecular Function: ADP binding (GO:0043531);;	K00695|8.0e-89|mtr:MTR_6g478030|K00695 sucrose synthase [EC:2.4.1.13] | (RefSeq) sucrose synthase	Starch and sucrose metabolism (ko00500)	--	--	NB-ARC domain	Disease resistance protein Roq1 OS=Nicotiana benthamiana OX=4100 GN=ROQ1 PE=1 SV=1	S	Function unknown	PREDICTED: TMV resistance protein N-like [Prunus mume]
PaF106G0100003883.01	218	220	413	129	52	111	7.46599	9.00866	14.5898	4.799	2.04846	3.78652	2.70781e-05	-1.22356	down	--	--	Biological Process: defense response (GO:0006952);;	--	--	--	--	Pathogenesis-related protein Bet v 1 family	MLP-like protein 328 OS=Arabidopsis thaliana OX=3702 GN=MLP328 PE=2 SV=1	--	--	Polyketide cyclase/dehydrase and lipid transport superfamily protein [Prunus dulcis]
PaF106G0100001674.01	1692	1014	1147	91	47	77	22.7619	16.5265	16.4132	1.46015	0.702796	0.94271	2.59647e-90	-3.77251	down	[G]	Carbohydrate transport and metabolism	Molecular Function: sugar:proton symporter activity (GO:0005351);; Cellular Component: integral component of plasma membrane (GO:0005887);; Biological Process: glucose import (GO:0046323);;	K03444|4.7e-280|pmum:103322904|K03444 MFS transporter, SP family, ERD6-like sugar transporter | (RefSeq) sugar transporter ERD6-like 16	--	[R]	General function prediction only	Sugar (and other) transporter	Sugar transporter ERD6-like 16 OS=Arabidopsis thaliana OX=3702 GN=At5g18840 PE=2 SV=2	U	Intracellular trafficking, secretion, and vesicular transport	unnamed protein product [Prunus armeniaca]
PaF106G0400015972.01	3320	2074	2641	5448	6235	6486	48.9242	36.5656	40.1462	87.3793	107.25	95.6983	2.17403e-28	1.25079	up	--	--	Molecular Function: DNA binding (GO:0003677);; Cellular Component: nucleus (GO:0005634);; Biological Process: regulation of transcription, DNA-templated (GO:0006355);;	K00521|2.8e-45|cmos:111447866|K00521 ferric-chelate reductase [EC:1.16.1.7] | (RefSeq) ferric reduction oxidase 7, chloroplastic-like	--	--	--	No apical meristem (NAM) protein	NAC domain-containing protein JA2 OS=Solanum lycopersicum OX=4081 GN=JA2 PE=2 SV=1	K	Transcription	unnamed protein product [Prunus armeniaca]
Prunus_sibirica_newGene_1338	7	5	5	226	234	208	0.032105	0.024194	0.023004	1.15863	1.28456	0.978153	1.69787e-47	4.1749	up	--	--	Biological Process: signal transduction (GO:0007165);; Molecular Function: ADP binding (GO:0043531);;	K00695|2.1e-97|mtr:MTR_6g478030|K00695 sucrose synthase [EC:2.4.1.13] | (RefSeq) sucrose synthase	Starch and sucrose metabolism (ko00500)	--	--	TIR domain	Disease resistance protein Roq1 OS=Nicotiana benthamiana OX=4100 GN=ROQ1 PE=1 SV=1	S	Function unknown	PREDICTED: TMV resistance protein N-like [Prunus mume]
PaF106G0300013898.01	412	395	432	129	157	155	4.38332	5.03018	4.74186	1.49375	1.94598	1.64835	1.29991e-14	-1.32573	down	--	--	Cellular Component: membrane (GO:0016020);; Cellular Component: integral component of membrane (GO:0016021);;	K15503|9.5e-07|cqi:110720991|K15503 serine/threonine-protein phosphatase 6 regulatory ankyrin repeat subunit B | (RefSeq) uncharacterized protein LOC110720991	--	[R]	General function prediction only	Ankyrin repeats (3 copies)	Ankyrin repeat-containing protein At2g01680 OS=Arabidopsis thaliana OX=3702 GN=At2g01680 PE=2 SV=1	S	Function unknown	unnamed protein product [Prunus armeniaca]
PaF106G0400016230.01	103	54	102	0	5	6	0.946294	0.584796	0.963545	0	0.043355	0.049396	2.66299e-14	-2.7193	down	--	--	Cellular Component: integral component of membrane (GO:0016021);;	K13466|3.5e-21|vvi:100246778|K13466 EIX receptor 1/2 | (RefSeq) receptor-like protein 12	Plant-pathogen interaction (ko04626)	--	--	Leucine rich repeat	Receptor-like protein EIX1 OS=Solanum lycopersicum OX=4081 GN=EIX1 PE=2 SV=2	T	Signal transduction mechanisms	receptor-like protein 2 [Prunus persica]
PaF106G0600023960.01	50	45	11	601	605	689	0.351943	0.376431	0.073407	4.61966	4.98624	4.87506	7.39321e-12	2.52453	up	--	--	Biological Process: defense response (GO:0006952);; Molecular Function: ADP binding (GO:0043531);;	K13457|0.0e+00|pper:18774035|K13457 disease resistance protein RPM1 | (RefSeq) disease resistance protein RPM1	Plant-pathogen interaction (ko04626)	[T]	Signal transduction mechanisms	NB-ARC domain	Disease resistance protein RPM1 OS=Arabidopsis thaliana OX=3702 GN=RPM1 PE=1 SV=1	T	Signal transduction mechanisms	disease resistance protein RPM1 [Prunus yedoensis var. nudiflora]
PaF106G0100002481.01	320	232	275	50	82	58	4.67053	4.04831	4.14707	0.781573	1.39144	0.83962	9.07665e-15	-1.79953	down	[R]	General function prediction only	Molecular Function: chitinase activity (GO:0004568);; Biological Process: carbohydrate metabolic process (GO:0005975);; Biological Process: chitin catabolic process (GO:0006032);; Biological Process: cell wall macromolecule catabolic process (GO:0016998);;	K01183|8.8e-136|pmum:103322431|K01183 chitinase [EC:3.2.1.14] | (RefSeq) endochitinase EP3-like	Amino sugar and nucleotide sugar metabolism (ko00520)	[R]	General function prediction only	Chitinase class I	Endochitinase EP3 OS=Arabidopsis thaliana OX=3702 GN=EP3 PE=1 SV=1	S	Function unknown	unnamed protein product [Prunus armeniaca]
PaF106G0600021693.01	116	133	84	25	15	42	1.71092	2.34878	1.27054	0.392834	0.25065	0.613371	2.02173e-06	-1.53238	down	--	--	Molecular Function: nucleic acid binding (GO:0003676);; Molecular Function: zinc ion binding (GO:0008270);; Biological Process: DNA integration (GO:0015074);;	K12393|3.2e-30|aof:109845736|K12393 AP-1 complex subunit mu | (RefSeq) LOW QUALITY PROTEIN: AP-1 complex subunit mu-2-like	--	[R]	General function prediction only	gag-polypeptide of LTR copia-type	--	T	Signal transduction mechanisms	hypothetical protein C1H46_017140 [Malus baccata]
PaF106G0200007390.01	493	423	502	170	199	211	2.15717	2.28175	2.31136	0.779435	1.01102	0.888456	1.82287e-13	-1.14721	down	[R]	General function prediction only	Molecular Function: ADP binding (GO:0043531);;	K12818|3.6e-164|mtr:MTR_0267s0070|K12818 ATP-dependent RNA helicase DHX8/PRP22 [EC:3.6.4.13] | (RefSeq) NB-ARC domain disease resistance protein, putative	Spliceosome (ko03040)	[T]	Signal transduction mechanisms	NB-ARC domain	Putative disease resistance RPP13-like protein 1 OS=Arabidopsis thaliana OX=3702 GN=RPPL1 PE=3 SV=1	T	Signal transduction mechanisms	PREDICTED: LOW QUALITY PROTEIN: putative disease resistance RPP13-like protein 1 [Prunus mume]
PaF106G0600022712.01	7	12	4	58	82	55	0.144209	0.310423	0.081206	1.42032	2.15112	1.23614	1.2917e-08	2.0537	up	--	--	Cellular Component: nucleus (GO:0005634);; Biological Process: DNA repair (GO:0006281);;	--	--	--	--	--	--	--	--	unnamed protein product [Prunus armeniaca]
PaF106G0800032134.01	294	304	398	21	13	21	2.22596	2.75865	3.10766	0.170444	0.106452	0.156277	1.20528e-46	-3.5384	down	--	--	Molecular Function: protein binding (GO:0005515);; Biological Process: biological_process (GO:0008150);; Biological Process: tissue development (GO:0009888);; Biological Process: meristem maintenance (GO:0010073);; Biological Process: multicellular organismal process (GO:0032501);; Biological Process: developmental process (GO:0032502);; Biological Process: meristem development (GO:0048507);; Bio…	--	--	[R]	General function prediction only	Leucine rich repeat	Receptor-like protein 35 OS=Arabidopsis thaliana OX=3702 GN=RLP35 PE=3 SV=1	S	Function unknown	hypothetical protein PRUPE_8G054400 [Prunus persica]
PaF106G0100004439.01	462	336	376	851	942	1131	5.44016	4.61972	4.4906	10.5322	12.7774	13.0479	5.82149e-28	1.36558	up	--	--	Molecular Function: transcriptional activator activity, RNA polymerase II transcription regulatory region sequence-specific binding (GO:0001228);; Cellular Component: nucleus (GO:0005634);; Molecular Function: protein dimerization activity (GO:0046983);;	--	--	--	--	--	--	K	Transcription	unnamed protein product [Prunus armeniaca]
PaF106G0600025730.01	504	99	67	17	39	32	6.87408	1.61564	0.933742	0.252292	0.617759	0.434761	0.0096883	-1.0333	down	[P]	Inorganic ion transport and metabolism	Molecular Function: ammonium transmembrane transporter activity (GO:0008519);; Cellular Component: integral component of membrane (GO:0016021);;	K03320|1.2e-275|pper:18775204|K03320 ammonium transporter, Amt family | (RefSeq) ammonium transporter 1 member 2	--	[P]	Inorganic ion transport and metabolism	Ammonium Transporter Family	Ammonium transporter 1 member 2 OS=Arabidopsis thaliana OX=3702 GN=AMT1-2 PE=1 SV=1	P	Inorganic ion transport and metabolism	unnamed protein product [Prunus armeniaca]
PaF106G0100000841.01	18	13	13	127	198	202	0.187717	0.15622	0.13668	1.62251	2.67448	2.3628	5.06792e-26	2.98749	up	--	--	Molecular Function: calmodulin binding (GO:0005516);; Molecular Function: ATP binding (GO:0005524);; Cellular Component: integral component of membrane (GO:0016021);;	K01537|1.3e-115|pmum:103323629|K01537 P-type Ca2+ transporter type 2C [EC:7.2.2.10] | (RefSeq) calcium-transporting ATPase 10, plasma membrane-type-like	--	[P]	Inorganic ion transport and metabolism	E1-E2 ATPase	Calcium-transporting ATPase 10, plasma membrane-type OS=Arabidopsis thaliana OX=3702 GN=ACA10 PE=1 SV=2	P	Inorganic ion transport and metabolism	unnamed protein product [Prunus armeniaca]
PaF106G0400015437.01	98	32	67	224	300	316	0.407081	0.159499	0.290573	1.01501	1.52823	1.36949	3.75817e-13	1.90119	up	[V]	Defense mechanisms	Cellular Component: plant-type vacuole (GO:0000325);; Molecular Function: ATP binding (GO:0005524);; Cellular Component: vacuolar membrane (GO:0005774);; Cellular Component: membrane (GO:0016020);; Cellular Component: integral component of membrane (GO:0016021);; Molecular Function: ATPase activity (GO:0016887);; Molecular Function: ATPase activity, coupled to transmembrane movement of substances…	K05666|0.0e+00|mesc:110610975|K05666 ATP-binding cassette, subfamily C (CFTR/MRP), member 2 | (RefSeq) ABC transporter C family member 3-like	ABC transporters (ko02010)	[Q]	Secondary metabolites biosynthesis, transport and catabolism	ABC transporter	ABC transporter C family member 3 OS=Arabidopsis thaliana OX=3702 GN=ABCC3 PE=1 SV=1	Q	Secondary metabolites biosynthesis, transport and catabolism	unnamed protein product [Prunus armeniaca]
PaF106G0100006400.01	165	172	135	8	11	18	1.17527	1.46649	0.992751	0.057953	0.089686	0.123852	1.67153e-22	-2.86724	down	--	--	Molecular Function: zinc ion binding (GO:0008270);;	K23541|7.0e-135|vvi:100265089|K23541 Ca2+/H+ antiporter, TMEM165/GDT1 family | (RefSeq) putative pentatricopeptide repeat-containing protein At3g23330	--	[R]	General function prediction only	PPR repeat family	Pentatricopeptide repeat-containing protein At3g13880 OS=Arabidopsis thaliana OX=3702 GN=PCMP-E89 PE=2 SV=1	S	Function unknown	PREDICTED: pentatricopeptide repeat-containing protein At3g13880 [Prunus mume]
PaF106G0100005490.01	6857	4542	5749	2030	2600	3189	99.5586	78.7333	86.1089	32.2919	44.218	46.1304	7.00244e-16	-1.01208	down	--	--	Cellular Component: integral component of membrane (GO:0016021);;	K12472|3.7e-27|bvg:104885038|K12472 epidermal growth factor receptor substrate 15 | (RefSeq) filaggrin-like	Endocytosis (ko04144)	--	--	BURP domain	BURP domain protein RD22 OS=Arabidopsis thaliana OX=3702 GN=RD22 PE=2 SV=1	S	Function unknown	PREDICTED: BURP domain protein RD22-like isoform X2 [Prunus mume]
PaF106G0800031601.01	41	28	42	88	135	162	0.345066	0.280311	0.363098	0.818529	1.34655	1.38655	3.68361e-08	1.56941	up	--	--	Biological Process: defense response (GO:0006952);; Molecular Function: ADP binding (GO:0043531);;	K13457|6.6e-82|qsu:112006818|K13457 disease resistance protein RPM1 | (RefSeq) disease resistance protein RPM1-like	Plant-pathogen interaction (ko04626)	[T]	Signal transduction mechanisms	NB-ARC domain	Putative disease resistance protein At1g50180 OS=Arabidopsis thaliana OX=3702 GN=At1g50180 PE=3 SV=2	T	Signal transduction mechanisms	PREDICTED: putative disease resistance [Prunus dulcis]
PaF106G0100001205.01	62	60	47	8	19	8	1.45614	1.67672	1.13411	0.190471	0.522901	0.179027	0.000113377	-1.42901	down	[F]	Nucleotide transport and metabolism	Biological Process: glutamine metabolic process (GO:0006541);;	K22314|1.2e-140|pmum:103323428|K22314 glucosinolate gamma-glutamyl hydrolase [EC:3.4.19.16] | (RefSeq) gamma-glutamyl peptidase 3-like	--	[F]	Nucleotide transport and metabolism	Glutamine amidotransferase class-I	Gamma-glutamyl peptidase 3 OS=Arabidopsis thaliana OX=3702 GN=GGP3 PE=1 SV=1	F	Nucleotide transport and metabolism	unnamed protein product [Prunus armeniaca]
PaF106G0700029062.01	34	30	43	98	96	103	0.466366	0.489827	0.620208	1.49954	1.56599	1.44693	3.79226e-06	1.31418	up	--	--	Molecular Function: DNA binding (GO:0003677);; Molecular Function: transcription factor activity, sequence-specific DNA binding (GO:0003700);; Cellular Component: nucleus (GO:0005634);;	K16222|4.3e-33|dct:110107877|K16222 Dof zinc finger protein DOF5.5 | (RefSeq) cyclic dof factor 1 isoform X1	Circadian rhythm - plant (ko04712)	--	--	Dof domain, zinc finger	Cyclic dof factor 2 OS=Arabidopsis thaliana OX=3702 GN=CDF2 PE=1 SV=2	K	Transcription	unnamed protein product [Prunus armeniaca]
PaF106G0400015265.01	12	30	18	42	64	87	0.217293	0.68097	0.340413	0.860005	1.4151	1.6627	0.00109781	1.19606	up	[Q]	Secondary metabolites biosynthesis, transport and catabolism	Molecular Function: oxidoreductase activity (GO:0016491);; Molecular Function: metal ion binding (GO:0046872);;	K14975|1.7e-58|psom:113311621|K14975 codeine 3-O-demethylase [EC:1.14.11.32] | (RefSeq) codeine O-demethylase	Isoquinoline alkaloid biosynthesis (ko00950)	[QR]	Secondary metabolites biosynthesis, transport and catabolism;; General function prediction only	non-haem dioxygenase in morphine synthesis N-terminal	Protein SRG1 OS=Arabidopsis thaliana OX=3702 GN=SRG1 PE=2 SV=1	Q	Secondary metabolites biosynthesis, transport and catabolism	unnamed protein product [Prunus armeniaca]
PaF106G0700028364.01	5	0	0	312	221	311	0.018069	0	0	1.26062	0.95663	1.15561	1.90593e-61	5.03267	up	--	--	Biological Process: signal transduction (GO:0007165);; Molecular Function: ADP binding (GO:0043531);;	K16225|1.0e-61|ath:AT5G45260|K16225 probable WRKY transcription factor 52 | (RefSeq) RRS1; Disease resistance protein (TIR-NBS-LRR class)	Plant-pathogen interaction (ko04626)	--	--	NB-ARC domain	Disease resistance protein Roq1 OS=Nicotiana benthamiana OX=4100 GN=ROQ1 PE=1 SV=1	S	Function unknown	PREDICTED: LOW QUALITY PROTEIN: uncharacterized protein LOC103339370 [Prunus mume]
PaF106G0200010797.01	2753	2218	2511	6684	5257	5656	52.2544	50.3833	49.1652	138.083	116.486	107.496	7.53197e-33	1.30231	up	[S]	Function unknown	Cellular Component: integral component of membrane (GO:0016021);;	--	--	--	--	Protein of unknown function, DUF599	--	S	Function unknown	uncharacterized protein LOC117618567 [Prunus dulcis]
PaF106G0200007240.01	559	420	535	92	105	120	2.45569	2.20937	2.4251	0.439274	0.53509	0.526847	1.34937e-35	-2.05089	down	[R]	General function prediction only	Molecular Function: ADP binding (GO:0043531);;	K12818|8.6e-122|mtr:MTR_0267s0070|K12818 ATP-dependent RNA helicase DHX8/PRP22 [EC:3.6.4.13] | (RefSeq) NB-ARC domain disease resistance protein, putative	Spliceosome (ko03040)	[T]	Signal transduction mechanisms	NB-ARC domain	Putative disease resistance RPP13-like protein 1 OS=Arabidopsis thaliana OX=3702 GN=RPPL1 PE=3 SV=1	T	Signal transduction mechanisms	PREDICTED: LOW QUALITY PROTEIN: putative disease resistance RPP13-like protein 1 [Prunus mume]
PaF106G0100000372.01	2220	2085	2445	289	340	379	19.5876	22.0192	22.2534	2.76679	3.50024	3.34243	1.16256e-113	-2.59253	down	--	--	Biological Process: phloem development (GO:0010088);;	--	--	--	--	Sieve element occlusion N-terminus	Protein SIEVE ELEMENT OCCLUSION B OS=Arabidopsis thaliana OX=3702 GN=SEOB PE=1 SV=1	S	Function unknown	PREDICTED: protein SIEVE ELEMENT OCCLUSION B-like [Prunus mume]
PaF106G0100002945.01	32	15	13	69	45	52	0.479722	0.263477	0.203121	1.13318	0.797591	0.789527	0.00219647	1.11658	up	--	--	Cellular Component: integral component of membrane (GO:0016021);;	--	--	--	--	--	--	--	--	NDR1/HIN1-like protein 13 [Prunus persica]
PaF106G0700028154.01	200	96	118	302	301	281	6.59042	4.06118	3.91993	11.187	11.7475	9.43559	1.79714e-06	1.09561	up	--	--	Molecular Function: molecular_function (GO:0003674);; Molecular Function: catalytic activity (GO:0003824);; Molecular Function: thioredoxin-disulfide reductase activity (GO:0004791);; Cellular Component: cellular_component (GO:0005575);; Cellular Component: intracellular (GO:0005622);; Cellular Component: cell (GO:0005623);; Cellular Component: cytoplasm (GO:0005737);; Biological Process: respons…	--	--	--	--	--	--	O	Posttranslational modification, protein turnover, chaperones	PREDICTED: thioredoxin [Prunus dulcis]
PaF106G0300011199.01	336	303	252	83	120	120	1.79576	1.94064	1.38723	0.476293	0.744959	0.635723	3.81227e-09	-1.26032	down	--	--	Molecular Function: nucleic acid binding (GO:0003676);; Molecular Function: helicase activity (GO:0004386);; Molecular Function: ATP binding (GO:0005524);;	K15271|3.7e-219|pmum:103330166|K15271 ATP-dependent DNA helicase HFM1/MER3 [EC:3.6.4.12] | (RefSeq) DExH-box ATP-dependent RNA helicase DExH17	--	[A]	RNA processing and modification	--	DExH-box ATP-dependent RNA helicase DExH17 OS=Arabidopsis thaliana OX=3702 GN=MER3 PE=2 SV=1	A	RNA processing and modification	PREDICTED: DExH-box ATP-dependent RNA helicase DExH17 [Prunus mume]
PaF106G0300014458.01	1166	972	1045	2223	2570	2848	11.011	11.366	9.96476	23.2371	27.8484	27.2285	1.91951e-42	1.32811	up	--	--	Molecular Function: DNA binding (GO:0003677);; Cellular Component: nucleus (GO:0005634);;	--	--	[O]	Posttranslational modification, protein turnover, chaperones	--	Protein REVEILLE 1 OS=Arabidopsis thaliana OX=3702 GN=RVE1 PE=1 SV=1	K	Transcription	unnamed protein product [Prunus armeniaca]
PaF106G0200008074.01	0	0	0	88	79	127	0	0	0	3.27474	3.15404	4.34754	3.18153e-28	3.8725	up	--	--	Biological Process: gene silencing by RNA (GO:0031047);;	--	--	--	--	--	--	--	--	hypothetical protein Pyn_35602 [Prunus yedoensis var. nudiflora]
PaF106G0600025658.01	312	328	318	71	92	187	6.00332	7.54851	6.31756	1.46875	2.05111	3.59449	1.01414e-06	-1.23571	down	--	--	Molecular Function: transcription coactivator activity (GO:0003713);; Cellular Component: nucleus (GO:0005634);; Cellular Component: cytoplasm (GO:0005737);; Biological Process: cell proliferation (GO:0008283);; Biological Process: positive regulation of transcription, DNA-templated (GO:0045893);; Biological Process: positive regulation of transcription from RNA polymerase II promoter (GO:0045944…	--	--	[K]	Transcription	SSXT protein (N-terminal region)	GRF-interacting factor 1 OS=Oryza sativa subsp. japonica OX=39947 GN=GIF1 PE=1 SV=1	K	Transcription	unnamed protein product [Prunus armeniaca]
PaF106G0700027562.01	820	538	642	1419	1441	1828	12.7658	10.0218	10.311	24.0364	26.1889	28.4905	1.9727e-28	1.28801	up	--	--	Molecular Function: transferase activity, transferring acyl groups other than amino-acyl groups (GO:0016747);;	K19747|1.1e-62|peq:110025140|K19747 BAHD acyltransferase [EC:2.3.1.-] | (RefSeq) BAHD acyltransferase DCR	--	--	--	Transferase family	Uncharacterized acetyltransferase At3g50280 OS=Arabidopsis thaliana OX=3702 GN=At3g50280 PE=3 SV=1	S	Function unknown	unnamed protein product [Prunus armeniaca]
PaF106G0100005998.01	225	153	115	46	37	32	2.7965	2.27452	1.47371	0.618846	0.536017	0.387851	8.33002e-09	-1.65295	down	--	--	Molecular Function: UDP-glycosyltransferase activity (GO:0008194);; Cellular Component: intracellular membrane-bounded organelle (GO:0043231);; Molecular Function: quercetin 3-O-glucosyltransferase activity (GO:0080043);; Molecular Function: quercetin 7-O-glucosyltransferase activity (GO:0080044);;	K22706|7.3e-195|pper:18788923|K22706 (R)-mandelonitrile beta-glucosyltransferase [EC:2.4.1.354] | (RefSeq) 7-deoxyloganetin glucosyltransferase	Cyanoamino acid metabolism (ko00460)	[GC]	Carbohydrate transport and metabolism;; Energy production and conversion	UDP-glucoronosyl and UDP-glucosyl transferase	7-deoxyloganetin glucosyltransferase OS=Gardenia jasminoides OX=114476 GN=UGT85A24 PE=1 SV=1	--	--	PREDICTED: 7-deoxyloganetin glucosyltransferase-like [Prunus mume]
PaF106G0300011255.01	790	663	805	1603	1765	2267	9.56041	9.59237	10.0445	21.1145	24.9373	27.4714	9.53831e-37	1.37053	up	--	--	Cellular Component: nucleus (GO:0005634);; Biological Process: response to blue light (GO:0009637);; Biological Process: response to salt stress (GO:0009651);; Biological Process: leaf morphogenesis (GO:0009965);; Biological Process: negative regulation of translation (GO:0017148);; Molecular Function: protein homodimerization activity (GO:0042803);; Molecular Function: sequence-specific DNA bind…	K09338|2.7e-140|pmum:103329879|K09338 homeobox-leucine zipper protein | (RefSeq) homeobox-leucine zipper protein HAT5	--	[K]	Transcription	Homeodomain	Homeobox-leucine zipper protein HAT5 OS=Arabidopsis thaliana OX=3702 GN=HAT5 PE=1 SV=1	K	Transcription	unnamed protein product [Prunus armeniaca]
PaF106G0300012327.01	0	0	0	56	55	77	0	0	0	0.858269	0.899087	1.09002	7.06125e-19	3.25012	up	--	--	Molecular Function: UDP-glycosyltransferase activity (GO:0008194);;	K22706|4.5e-157|pper:18788923|K22706 (R)-mandelonitrile beta-glucosyltransferase [EC:2.4.1.354] | (RefSeq) 7-deoxyloganetin glucosyltransferase	Cyanoamino acid metabolism (ko00460)	[GC]	Carbohydrate transport and metabolism;; Energy production and conversion	UDP-glucoronosyl and UDP-glucosyl transferase	7-deoxyloganetin glucosyltransferase OS=Catharanthus roseus OX=4058 GN=UGT85A23 PE=1 SV=1	--	--	PREDICTED: 7-deoxyloganetin glucosyltransferase-like isoform X1 [Prunus mume]
PaF106G0200010085.01	289	271	340	626	565	612	5.76758	6.45266	6.98774	13.5825	13.1641	12.2319	1.39267e-12	1.04925	up	--	--	Molecular Function: peroxidase activity (GO:0004601);; Cellular Component: extracellular region (GO:0005576);; Biological Process: response to oxidative stress (GO:0006979);; Molecular Function: heme binding (GO:0020037);; Biological Process: hydrogen peroxide catabolic process (GO:0042744);; Molecular Function: metal ion binding (GO:0046872);;	K00430|2.0e-175|pper:18785759|K00430 peroxidase [EC:1.11.1.7] | (RefSeq) peroxidase P7	Phenylpropanoid biosynthesis (ko00940)	--	--	Peroxidase	Peroxidase 52 OS=Arabidopsis thaliana OX=3702 GN=PER52 PE=2 SV=1	Q	Secondary metabolites biosynthesis, transport and catabolism	unnamed protein product [Prunus armeniaca]
PaF106G0800030531.01	81	64	100	18	16	54	1.57541	1.88155	1.72372	0.476878	0.446426	1.33396	0.00376071	-1.04062	down	[K]	Transcription	Molecular Function: O-methyltransferase activity (GO:0008171);; Molecular Function: S-adenosylmethionine-dependent methyltransferase activity (GO:0008757);; Biological Process: aromatic compound biosynthetic process (GO:0019438);; Biological Process: methylation (GO:0032259);; Molecular Function: protein dimerization activity (GO:0046983);;	K22588|1.4e-105|crb:17880076|K22588 acetylserotonin O-methyltransferase, plant [EC:2.1.1.4] | (RefSeq) xanthohumol 4'-O-methyltransferase	Tryptophan metabolism (ko00380)	[R]	General function prediction only	O-methyltransferase domain	Acetylserotonin O-methyltransferase OS=Arabidopsis thaliana OX=3702 GN=ASMT PE=1 SV=1	S	Function unknown	unnamed protein product [Prunus armeniaca]
PaF106G0600024829.01	76	51	95	14	26	19	1.32883	1.06661	1.70264	0.255158	0.52685	0.326512	0.000104104	-1.33392	down	--	--	Cellular Component: ubiquitin ligase complex (GO:0000151);; Molecular Function: molecular_function (GO:0003674);; Molecular Function: catalytic activity (GO:0003824);; Molecular Function: ubiquitin-protein transferase activity (GO:0004842);; Cellular Component: cellular_component (GO:0005575);; Cellular Component: intracellular (GO:0005622);; Cellular Component: cell (GO:0005623);; Cellular Compo…	--	--	--	--	Protein of unknown function (DUF295)	F-box protein SKIP23 OS=Arabidopsis thaliana OX=3702 GN=SKIP23 PE=1 SV=1	S	Function unknown	unnamed protein product [Prunus armeniaca]
PaF106G0400014797.01	59	53	53	201	265	221	0.736672	0.786477	0.680913	2.76246	3.90489	2.79103	8.06844e-17	1.92609	up	[E]	Amino acid transport and metabolism	Biological Process: amino acid transport (GO:0006865);; Cellular Component: integral component of membrane (GO:0016021);; Molecular Function: transmembrane transporter activity (GO:0022857);;	K19564|1.2e-49|qsu:111984493|K19564 choline transport protein | (RefSeq) choline transport protein-like	--	[E]	Amino acid transport and metabolism	Amino acid permease	Amino-acid permease BAT1 OS=Arabidopsis thaliana OX=3702 GN=BAT1 PE=2 SV=2	E	Amino acid transport and metabolism	unnamed protein product [Prunus armeniaca]
PaF106G0100006682.01	738	523	628	11	21	39	5.77557	4.90213	5.07405	0.086736	0.188259	0.303691	1.2019e-78	-4.15306	down	--	--	Cellular Component: integral component of membrane (GO:0016021);; Molecular Function: kinase activity (GO:0016301);;	K13466|4.0e-52|jre:108979830|K13466 EIX receptor 1/2 | (RefSeq) receptor-like protein EIX2 isoform X1	Plant-pathogen interaction (ko04626)	[R]	General function prediction only	Leucine rich repeat	Receptor like protein 22 OS=Arabidopsis thaliana OX=3702 GN=RLP22 PE=2 SV=1	Q	Secondary metabolites biosynthesis, transport and catabolism	PREDICTED: probable leucine-rich repeat receptor-like protein kinase At2g33170 [Prunus mume]
PaF106G0500019643.01	52	33	54	91	89	120	1.02537	0.781273	1.10501	1.96928	2.06714	2.38257	0.00032228	1.01869	up	[IQR]	Lipid transport and metabolism;; Secondary metabolites biosynthesis, transport and catabolism;; General function prediction only	Cellular Component: membrane (GO:0016020);; Biological Process: oxidation-reduction process (GO:0055114);;	K15095|7.0e-162|pmum:103337493|K15095 (+)-neomenthol dehydrogenase [EC:1.1.1.208] | (RefSeq) salutaridine reductase-like	Monoterpenoid biosynthesis (ko00902)	[Q]	Secondary metabolites biosynthesis, transport and catabolism	short chain dehydrogenase	Salutaridine reductase OS=Papaver bracteatum OX=215227 GN=SALR PE=1 SV=1	Q	Secondary metabolites biosynthesis, transport and catabolism	PREDICTED: salutaridine reductase-like [Prunus mume]
PaF106G0800032177.01	72	64	83	5	5	12	2.62318	2.80092	3.1098	0.191598	0.19488	0.425257	1.12516e-10	-2.23287	down	--	--	Cellular Component: photosystem I (GO:0009522);; Cellular Component: chloroplast thylakoid membrane (GO:0009535);; Biological Process: photosynthesis (GO:0015979);; Cellular Component: integral component of membrane (GO:0016021);;	K02634|1.2e-48|dzi:111284174|K02634 apocytochrome f | (RefSeq) uncharacterized protein LOC111284174	Photosynthesis (ko00195)	--	--	Ycf4	Photosystem I assembly protein Ycf4 OS=Nicotiana tomentosiformis OX=4098 GN=ycf4 PE=3 SV=1	S	Function unknown	Ycf4 [Prunus sibirica]
PaF106G0200007267.01	289	194	200	497	498	402	1.81154	1.45518	1.29254	3.3951	3.64424	2.52189	3.77938e-08	1.06754	up	--	--	Molecular Function: GTPase activity (GO:0003924);; Molecular Function: GTP binding (GO:0005525);; Cellular Component: cytoplasm (GO:0005737);; Molecular Function: microtubule binding (GO:0008017);; Cellular Component: membrane (GO:0016020);; Biological Process: organelle fission (GO:0048285);;	--	--	[UR]	Intracellular trafficking, secretion, and vesicular transport;; General function prediction only	Dynamin central region	Dynamin-related protein 4C OS=Arabidopsis thaliana OX=3702 GN=DRP4C PE=2 SV=1	U	Intracellular trafficking, secretion, and vesicular transport	unnamed protein product [Prunus armeniaca]
PaF106G0800032113.01	285	288	302	133	70	115	4.63371	5.60847	5.07782	2.36054	1.30761	1.86738	2.7e-08	-1.25203	down	[L]	Replication, recombination and repair	Molecular Function: DNA binding (GO:0003677);; Molecular Function: DNA-directed DNA polymerase activity (GO:0003887);; Biological Process: DNA-dependent DNA replication (GO:0006261);;	K02335|6.8e-12|cme:CYME_CMT462C|K02335 DNA polymerase I [EC:2.7.7.7] | (RefSeq) bacterial DNA polymerase I	DNA replication (ko03030);; Base excision repair (ko03410);; Nucleotide excision repair (ko03420);; Homologous recombination (ko03440)	--	--	5'-3' exonuclease, N-terminal resolvase-like domain	--	L	Replication, recombination and repair	PREDICTED: DNA polymerase I, thermostable [Prunus mume]
PaF106G0200009345.01	1755	1282	1649	412	436	433	24.2747	21.2265	23.5282	6.19922	7.04041	5.98917	4.39881e-49	-1.7254	down	[QR]	Secondary metabolites biosynthesis, transport and catabolism;; General function prediction only	Molecular Function: O-methyltransferase activity (GO:0008171);; Biological Process: methylation (GO:0032259);; Molecular Function: protein dimerization activity (GO:0046983);;	K13066|1.4e-167|pmum:103342359|K13066 caffeic acid 3-O-methyltransferase [EC:2.1.1.68] | (RefSeq) OMT1; uncharacterized protein LOC103342359	Phenylpropanoid biosynthesis (ko00940)	[R]	General function prediction only	O-methyltransferase domain	Caffeic acid 3-O-methyltransferase OS=Prunus dulcis OX=3755 GN=COMT1 PE=2 SV=1	--	--	unnamed protein product [Prunus armeniaca]
PaF106G0400017578.01	30	29	39	259	240	222	0.880374	0.99823	1.1329	8.3104	7.35934	6.55451	5.33655e-28	2.61971	up	[R]	General function prediction only	Biological Process: mitochondrial respiratory chain complex I assembly (GO:0032981);;	K03070|2.8e-26|pmum:103319773|K03070 preprotein translocase subunit SecA [EC:7.4.2.8] | (RefSeq) protein translocase subunit SECA2, chloroplastic	Protein export (ko03060)	[G]	Carbohydrate transport and metabolism	Complex I intermediate-associated protein 30 (CIA30)	Protein translocase subunit SECA2, chloroplastic OS=Arabidopsis thaliana OX=3702 GN=SECA2 PE=1 SV=1	G	Carbohydrate transport and metabolism	unnamed protein product [Prunus armeniaca]
PaF106G0100004078.01	4476	5901	6924	10746	12837	12250	33.1212	52.2566	52.8504	86.5384	110.878	90.7509	1.4019e-05	1.01775	up	--	--	Biological Process: lipid transport (GO:0006869);; Molecular Function: lipid binding (GO:0008289);; Cellular Component: integral component of membrane (GO:0016021);;	--	--	[R]	General function prediction only	--	--	M	Cell wall/membrane/envelope biogenesis	PREDICTED: tricalbin-3 [Prunus mume]
PaF106G0400016319.01	787	462	365	0	1	0	7.63269	5.44136	3.70121	0	0.006644	0	1.58982e-77	-5.76168	down	--	--	Cellular Component: integral component of membrane (GO:0016021);;	K13466|1.6e-21|vvi:100246778|K13466 EIX receptor 1/2 | (RefSeq) receptor-like protein 12	Plant-pathogen interaction (ko04626)	--	--	Leucine rich repeat	--	T	Signal transduction mechanisms	PREDICTED: tyrosine-sulfated glycopeptide receptor 1-like isoform X1 [Prunus mume]
PaF106G0700026418.01	1439	1058	1380	2225	2295	2896	29.1124	25.6153	28.7878	48.9878	54.1972	58.6686	7.38552e-25	1.00642	up	[HR]	Coenzyme transport and metabolism;; General function prediction only	Molecular Function: hydrolase activity (GO:0016787);;	--	--	--	--	alpha/beta hydrolase fold	Strigolactone esterase D14 OS=Oryza sativa subsp. japonica OX=39947 GN=D14 PE=1 SV=1	S	Function unknown	unnamed protein product [Prunus armeniaca]
PaF106G0100002800.01	30	17	35	123	45	95	0.401699	0.259347	0.476706	1.79385	0.697324	1.27023	0.000172445	1.30398	up	[QV]	Secondary metabolites biosynthesis, transport and catabolism;; Defense mechanisms	Molecular Function: monooxygenase activity (GO:0004497);; Molecular Function: iron ion binding (GO:0005506);; Cellular Component: integral component of membrane (GO:0016021);; Molecular Function: oxidoreductase activity, acting on paired donors, with incorporation or reduction of molecular oxygen (GO:0016705);; Molecular Function: heme binding (GO:0020037);;	K23810|3.3e-172|vvi:100232891|K23810 (E)-8-carboxylinalool synthase [EC:1.14.14.-] | (RefSeq) GFH2; ripening-related P-450 enzyme-like	Monoterpenoid biosynthesis (ko00902)	[Q]	Secondary metabolites biosynthesis, transport and catabolism	Cytochrome P450	Geraniol 8-hydroxylase OS=Catharanthus roseus OX=4058 GN=CYP76B6 PE=1 SV=1	Q	Secondary metabolites biosynthesis, transport and catabolism	PREDICTED: geraniol 8-hydroxylase-like [Prunus mume]
PaF106G0700027221.01	214	192	191	306	367	613	3.55543	3.81457	3.26056	5.53551	7.10334	10.1953	1.5025e-07	1.08016	up	[I]	Lipid transport and metabolism	Molecular Function: S-adenosylmethionine-dependent methyltransferase activity (GO:0008757);; Biological Process: methylation (GO:0032259);;	K21483|8.3e-90|bna:106358999|K21483 salicylate 1-O-methyltransferase [EC:2.1.1.274] | (RefSeq) salicylate carboxymethyltransferase-like	--	--	--	SAM dependent carboxyl methyltransferase	Jasmonate O-methyltransferase OS=Arabidopsis thaliana OX=3702 GN=JMT PE=1 SV=3	S	Function unknown	PREDICTED: jasmonate O-methyltransferase [Prunus mume]
PaF106G0300012363.01	81	53	46	13	28	21	1.09817	0.851622	0.638214	0.191762	0.444724	0.276415	0.00473324	-1.02539	down	[P]	Inorganic ion transport and metabolism	Molecular Function: zinc ion transmembrane transporter activity (GO:0005385);; Cellular Component: plasma membrane (GO:0005886);; Cellular Component: membrane (GO:0016020);; Cellular Component: integral component of membrane (GO:0016021);; Biological Process: zinc II ion transmembrane transport (GO:0071577);;	K14709|1.6e-189|pmum:103328994|K14709 solute carrier family 39 (zinc transporter), member 1/2/3 | (RefSeq) zinc transporter 8-like	--	[P]	Inorganic ion transport and metabolism	ZIP Zinc transporter	Zinc transporter 8 OS=Oryza sativa subsp. japonica OX=39947 GN=ZIP8 PE=2 SV=1	P	Inorganic ion transport and metabolism	unnamed protein product [Prunus armeniaca]
PaF106G0200009439.01	96	61	135	217	216	169	1.45684	1.10346	2.12805	3.6074	3.85955	2.58172	0.000221209	1.00203	up	[I]	Lipid transport and metabolism	Molecular Function: 3-hydroxyisobutyryl-CoA hydrolase activity (GO:0003860);; Biological Process: valine catabolic process (GO:0006574);;	K05605|1.9e-217|pmum:103332314|K05605 3-hydroxyisobutyryl-CoA hydrolase [EC:3.1.2.4] | (RefSeq) 3-hydroxyisobutyryl-CoA hydrolase 1-like	Valine, leucine and isoleucine degradation (ko00280);; beta-Alanine metabolism (ko00410);; Propanoate metabolism (ko00640);; Carbon metabolism (ko01200)	--	--	Enoyl-CoA hydratase/isomerase	3-hydroxyisobutyryl-CoA hydrolase 1 OS=Arabidopsis thaliana OX=3702 GN=CHY1 PE=1 SV=1	I	Lipid transport and metabolism	PREDICTED: 3-hydroxyisobutyryl-CoA hydrolase 1-like [Prunus mume]
PaF106G0700028825.01	986	958	1206	439	385	505	21.2508	25.305	27.007	12.7708	10.6245	13.2664	2.16176e-17	-1.12741	down	--	--	Molecular Function: structural constituent of ribosome (GO:0003735);; Cellular Component: mitochondrion (GO:0005739);; Biological Process: translation (GO:0006412);; Cellular Component: small ribosomal subunit (GO:0015935);;	K02946|9.4e-45|mdm:103436347|K02946 small subunit ribosomal protein S10 | (RefSeq) uncharacterized protein LOC103436347	Ribosome (ko03010)	--	--	Ribosomal protein S10p/S20e	Ribosomal protein S10, mitochondrial OS=Pisum sativum OX=3888 GN=RPS10 PE=2 SV=1	J	Translation, ribosomal structure and biogenesis	hypothetical protein PRUPE_7G030100 [Prunus persica]
PaF106G0100000568.01	157	152	213	657	581	570	2.82704	3.28044	3.97078	12.9357	12.2734	10.3194	7.86399e-24	1.77498	up	[R]	General function prediction only	Molecular Function: acid phosphatase activity (GO:0003993);;	K20728|1.5e-43|thj:104814965|K20728 vegetative storage protein 2 | (RefSeq) vegetative storage protein 2-like	MAPK signaling pathway - plant (ko04016)	--	--	HAD superfamily, subfamily IIIB (Acid phosphatase)	Acid phosphatase 1 OS=Solanum lycopersicum OX=4081 GN=APS1 PE=2 SV=1	S	Function unknown	unnamed protein product [Prunus armeniaca]
PaF106G0100004447.01	433	366	469	711	974	1121	7.63603	7.73347	8.51691	13.6981	20.128	19.8417	1.76901e-14	1.17725	up	[I]	Lipid transport and metabolism	Molecular Function: S-adenosylmethionine-dependent methyltransferase activity (GO:0008757);; Biological Process: methylation (GO:0032259);;	K08241|2.5e-209|pmum:103320875|K08241 jasmonate O-methyltransferase [EC:2.1.1.141] | (RefSeq) jasmonate O-methyltransferase-like	alpha-Linolenic acid metabolism (ko00592)	--	--	SAM dependent carboxyl methyltransferase	Jasmonate O-methyltransferase OS=Brassica rapa subsp. pekinensis OX=51351 GN=JMT PE=1 SV=1	S	Function unknown	PREDICTED: jasmonate O-methyltransferase-like [Prunus mume]
PaF106G0800030463.01	0	3	4	403	455	521	0	0.04116	0.055448	6.8792	9.12929	8.9329	4.58966e-91	5.6667	up	--	--	Biological Process: regulation of transcription from RNA polymerase II promoter (GO:0006357);; Molecular Function: cyclin-dependent protein serine/threonine kinase regulator activity (GO:0016538);; Cellular Component: host cell nucleus (GO:0042025);;	K06634|1.7e-57|pmum:103334781|K06634 cyclin H | (RefSeq) cyclin-H1-1-like	Basal transcription factors (ko03022);; Nucleotide excision repair (ko03420)	[DKL]	Cell cycle control, cell division, chromosome partitioning;; Transcription;; Replication, recombination and repair	Cyclin, N-terminal domain	Cyclin-H1-1 OS=Arabidopsis thaliana OX=3702 GN=CYCH1-1 PE=1 SV=1	--	--	hypothetical protein PRUPE_6G323600 [Prunus persica]
PaF106G0400015511.01	21	36	37	120	107	101	0.425295	0.912963	0.797923	2.75997	2.6449	2.12313	5.38869e-07	1.52156	up	[T]	Signal transduction mechanisms	Molecular Function: protein kinase activity (GO:0004672);; Molecular Function: ATP binding (GO:0005524);;	K08867|1.4e-170|pmum:103326634|K08867 WNK lysine deficient protein kinase [EC:2.7.11.1] | (RefSeq) probable serine/threonine-protein kinase WNK11	--	[R]	General function prediction only	Protein kinase domain	Probable serine/threonine-protein kinase WNK11 OS=Arabidopsis thaliana OX=3702 GN=WNK11 PE=2 SV=1	T	Signal transduction mechanisms	unnamed protein product [Prunus armeniaca]
PaF106G0700027799.01	8	7	1	96	180	97	0.28533	0.296813	0.036932	3.80078	7.68661	3.53606	1.34254e-18	3.03732	up	--	--	Cellular Component: plasmodesma (GO:0009506);; Cellular Component: anchored component of plasma membrane (GO:0046658);;	--	--	--	--	Late embryogenesis abundant protein	--	--	--	unnamed protein product [Prunus armeniaca]
[truncated: 818 more rows]
