# Supplementary material for: Mining for genes related to pistil abortion in Prunus sibirica L
Source: PeerJ. 2022 Nov 15;10:e14366. doi: 10.7717/peerj.14366 (PMC9673769; doi:10.7717/peerj.14366)
Supplement: Table S8 [file peerj-10-14366-s008.xls]

## Sheet: Sheet1
Table S8 Detailed information of DEGs in KEGG pathway enrichment analysis
#ID	NPt1_Count	NPt2_Count	NPt3_Count	APt1_Count	APt2_Count	APt3_Count	NPt1_FPKM	NPt2_FPKM	NPt3_FPKM	APt1_FPKM	APt2_FPKM	APt3_FPKM	FDR	log2FC	regulated	COG_class	COG_class_annotation	GO_annotation	KEGG_annotation	KEGG_pathway_annotation	KOG_class	KOG_class_annotation	Pfam_annotation	Swiss-Prot_annotation	eggNOG_class	eggNOG_class_annotation	NR_annotation
PaF106G0400016848.01	133	105	55	16	23	34	1.15473	0.913665	0.381922	0.116929	0.176981	0.233678	2.33086e-05	-1.43747	down	--	--	Cellular Component: integral component of membrane (GO:0016021);;	K13466|1.0e-57|mdm:103439827|K13466 EIX receptor 1/2 | (RefSeq) receptor-like protein EIX2	Plant-pathogen interaction (ko04626)	--	--	Leucine rich repeat	Receptor-like protein 1 OS=Arabidopsis thaliana OX=3702 GN=RLP1 PE=2 SV=2	Q	Secondary metabolites biosynthesis, transport and catabolism	LRR receptor-like serine/threonine-protein kinase GSO1 [Prunus persica]
PaF106G0800030081.01	5860	4418	4509	1196	1135	977	89.1933	80.4833	70.8888	19.1251	19.2991	14.36	5.56432e-55	-1.98937	down	[R]	General function prediction only	Molecular Function: alcohol dehydrogenase activity, zinc-dependent (GO:0004024);; Cellular Component: cytosol (GO:0005829);; Molecular Function: zinc ion binding (GO:0008270);; Biological Process: formaldehyde catabolic process (GO:0046294);; Molecular Function: S-(hydroxymethyl)glutathione dehydrogenase activity (GO:0051903);;	K18857|1.2e-137|pper:18766308|K18857 alcohol dehydrogenase class-P [EC:1.1.1.1] | (RefSeq) alcohol dehydrogenase	Glycolysis / Gluconeogenesis (ko00010);; Fatty acid degradation (ko00071);; Tyrosine metabolism (ko00350);; alpha-Linolenic acid metabolism (ko00592)	[Q]	Secondary metabolites biosynthesis, transport and catabolism	Alcohol dehydrogenase GroES-like domain	Alcohol dehydrogenase OS=Malus domestica OX=3750 GN=ADH PE=2 SV=1	Q	Secondary metabolites biosynthesis, transport and catabolism	unnamed protein product [Prunus armeniaca]
PaF106G0600023237.01	217	254	281	513	601	709	1.67718	2.34926	2.24234	4.31567	5.4237	5.4951	1.78125e-14	1.2822	up	[T]	Signal transduction mechanisms	Biological Process: defense response (GO:0006952);; Molecular Function: ADP binding (GO:0043531);;	K13457|2.5e-114|qsu:111992130|K13457 disease resistance protein RPM1 | (RefSeq) disease resistance protein RPM1-like	Plant-pathogen interaction (ko04626)	[T]	Signal transduction mechanisms	NB-ARC domain	Putative disease resistance protein At1g50180 OS=Arabidopsis thaliana OX=3702 GN=At1g50180 PE=3 SV=2	T	Signal transduction mechanisms	PREDICTED: probable disease resistance RPP8-like protein 2 [Prunus mume]
PaF106G0100006458.01	46	32	33	150	210	235	0.67071	0.560371	0.490804	2.38729	3.58056	3.42848	1.92403e-18	2.18811	up	--		Molecular Function: transmembrane receptor protein serine/threonine kinase activity (GO:0004675);; Molecular Function: receptor binding (GO:0005102);; Molecular Function: ATP binding (GO:0005524);;	K13416|1.6e-189|pper:18792858|K13416 brassinosteroid insensitive 1-associated receptor kinase 1 [EC:2.7.10.1 2.7.11.1] | (RefSeq) BRASSINOSTEROID INSENSITIVE 1-associated receptor kinase 1	MAPK signaling pathway - plant (ko04016);; Plant hormone signal transduction (ko04075);; Plant-pathogen interaction (ko04626)	[T]	Signal transduction mechanisms	Protein kinase domain	BRASSINOSTEROID INSENSITIVE 1-associated receptor kinase 1 OS=Arabidopsis thaliana OX=3702 GN=BAK1 PE=1 SV=2	T	Signal transduction mechanisms	BRASSINOSTEROID INSENSITIVE 1-associated receptor kinase 1-like [Prunus dulcis]
PaF106G0200010874.01	8	12	20	57	87	115	0.108567	0.192998	0.280493	0.863532	1.49518	1.62176	6.59901e-09	1.97976	up	[R]	General function prediction only	Biological Process: oxidation-reduction process (GO:0055114);;	K00121|3.4e-201|pavi:110758566|K00121 S-(hydroxymethyl)glutathione dehydrogenase / alcohol dehydrogenase [EC:1.1.1.284 1.1.1.1] | (RefSeq) alcohol dehydrogenase-like 1	Glycolysis / Gluconeogenesis (ko00010);; Fatty acid degradation (ko00071);; Tyrosine metabolism (ko00350);; Carbon metabolism (ko01200)	[Q]	Secondary metabolites biosynthesis, transport and catabolism	Alcohol dehydrogenase GroES-like domain	CYP enzymes assisting alcohol dehydrogenase OS=Catharanthus roseus OX=4058 GN=CYPADH PE=1 SV=1	Q	Secondary metabolites biosynthesis, transport and catabolism	unnamed protein product [Prunus armeniaca]
PaF106G0400016209.01	452	551	649	233	205	245	5.39297	7.88414	8.15251	3.09882	2.92307	3.0266	8.22649e-10	-1.1248	down	[J]	Translation, ribosomal structure and biogenesis	Molecular Function: ATP binding (GO:0005524);; Cellular Component: mitochondrion (GO:0005739);; Biological Process: tRNA modification (GO:0006400);; Biological Process: cytokinin biosynthetic process (GO:0009691);; Molecular Function: tRNA dimethylallyltransferase activity (GO:0052381);;	K00791|1.7e-252|pper:18778576|K00791 tRNA dimethylallyltransferase [EC:2.5.1.75] | (RefSeq) tRNA dimethylallyltransferase 9 isoform X1	Zeatin biosynthesis (ko00908)	[J]	Translation, ribosomal structure and biogenesis	IPP transferase	tRNA dimethylallyltransferase 9 OS=Arabidopsis thaliana OX=3702 GN=IPT9 PE=2 SV=1	J	Translation, ribosomal structure and biogenesis	unnamed protein product [Prunus armeniaca]
PaF106G0300013919.01	179	184	200	626	466	614	0.765752	0.941558	0.881564	2.91875	2.33045	2.63258	4.09646e-23	1.59766	up	[V]	Defense mechanisms	Molecular Function: ATP binding (GO:0005524);; Cellular Component: integral component of membrane (GO:0016021);; Molecular Function: ATPase activity (GO:0016887);;	K08712|5.0e-144|gsl:Gasu_29800|K08712 ATP-binding cassette, subfamily G (WHITE), member 2, SNQ2 | (RefSeq) ABC transporter, ATP-binding protein	ABC transporters (ko02010)	[Q]	Secondary metabolites biosynthesis, transport and catabolism	ABC-2 type transporter	ABC transporter G family member 36 OS=Arabidopsis thaliana OX=3702 GN=ABCG36 PE=1 SV=1	Q	Secondary metabolites biosynthesis, transport and catabolism	unnamed protein product [Prunus armeniaca]
PaF106G0200007289.01	1455	1279	1326	189	182	234	5.39347	5.66923	5.05029	0.869916	0.81294	0.94767	2.36283e-111	-2.59478	down	[R]	General function prediction only	Molecular Function: ADP binding (GO:0043531);;	K12818|4.3e-197|mtr:MTR_0267s0070|K12818 ATP-dependent RNA helicase DHX8/PRP22 [EC:3.6.4.13] | (RefSeq) NB-ARC domain disease resistance protein, putative	Spliceosome (ko03040)	[T]	Signal transduction mechanisms	NB-ARC domain	Putative disease resistance RPP13-like protein 1 OS=Arabidopsis thaliana OX=3702 GN=RPPL1 PE=3 SV=1	T	Signal transduction mechanisms	PREDICTED: LOW QUALITY PROTEIN: putative disease resistance RPP13-like protein 1 [Prunus mume]
PaF106G0700027064.01	556	487	354	50	61	48	10.9354	11.4542	7.17888	1.06159	1.37844	0.946275	4.64282e-36	-2.74062	down	--	--	Molecular Function: peroxidase activity (GO:0004601);; Cellular Component: extracellular region (GO:0005576);; Biological Process: response to oxidative stress (GO:0006979);; Molecular Function: heme binding (GO:0020037);; Biological Process: hydrogen peroxide catabolic process (GO:0042744);; Molecular Function: metal ion binding (GO:0046872);;	K00430|1.6e-177|pavi:110758377|K00430 peroxidase [EC:1.11.1.7] | (RefSeq) peroxidase 64	Phenylpropanoid biosynthesis (ko00940)	--	--	Peroxidase	Peroxidase 64 OS=Arabidopsis thaliana OX=3702 GN=PER64 PE=1 SV=1	Q	Secondary metabolites biosynthesis, transport and catabolism	unnamed protein product [Prunus armeniaca]
PaF106G0500021188.01	0	0	0	56	62	86	0	0	0	1.2151	1.44824	1.72401	3.40877e-20	3.35075	up	--	--	Molecular Function: S-adenosylmethionine-dependent methyltransferase activity (GO:0008757);; Biological Process: methylation (GO:0032259);;	K08241|1.2e-18|fve:101301186|K08241 jasmonate O-methyltransferase [EC:2.1.1.141] | (RefSeq) jasmonate O-methyltransferase-like	alpha-Linolenic acid metabolism (ko00592)	--	--	SAM dependent carboxyl methyltransferase	Loganic acid O-methyltransferase OS=Catharanthus roseus OX=4058 GN=LAMT PE=1 SV=1	S	Function unknown	loganic acid O-methyltransferase-like [Prunus dulcis]
PaF106G0800030406.01	1361	1497	1539	3272	3015	3741	5.50488	7.78028	6.81683	17.4766	17.7351	18.4319	9.13376e-32	1.23928	up	[R]	General function prediction only	Biological Process: signal transduction (GO:0007165);; Molecular Function: ADP binding (GO:0043531);;	K00695|1.1e-98|mtr:MTR_6g478030|K00695 sucrose synthase [EC:2.4.1.13] | (RefSeq) sucrose synthase	Starch and sucrose metabolism (ko00500)	--	--	NB-ARC domain	Disease resistance protein Roq1 OS=Nicotiana benthamiana OX=4100 GN=ROQ1 PE=1 SV=1	T	Signal transduction mechanisms	PREDICTED: uncharacterized protein LOC103334707 [Prunus mume]
Prunus_sibirica_newGene_527	498	546	541	68	21	53	6.11311	7.22956	6.3674	0.908814	0.197256	0.454606	4.33478e-35	-2.98795	down	--	--	Cellular Component: integral component of membrane (GO:0016021);;	K08507|4.3e-15|pper:18786079|K08507 unconventional SNARE in the endoplasmic reticulum protein 1 | (RefSeq) uncharacterized protein LOC18786079 isoform X2	SNARE interactions in vesicular transport (ko04130)	--	--	--	--	S	Function unknown	unnamed protein product [Prunus armeniaca]
Prunus_sibirica_newGene_2024	194	111	129	6	2	7	1.96381	1.36254	1.34569	0.064191	0.021611	0.070336	2.02914e-26	-3.4006	down	--	--	--	K12667|2.8e-16|qsu:112019243|K12667 oligosaccharyltransferase complex subunit delta (ribophorin II) | (RefSeq) dolichyl-diphosphooligosaccharide--protein glycosyltransferase subunit 2	N-Glycan biosynthesis (ko00510);; Various types of N-glycan biosynthesis (ko00513);; Protein processing in endoplasmic reticulum (ko04141)	--	--	--	--	L	Replication, recombination and repair	PREDICTED: reverse mRNAase [Prunus dulcis]
PaF106G0600023222.01	75	96	108	192	234	338	1.52389	2.38523	2.31318	4.31538	5.6663	7.03684	1.15242e-08	1.35287	up	[IQR]	Lipid transport and metabolism;; Secondary metabolites biosynthesis, transport and catabolism;; General function prediction only	--	K15095|2.5e-168|pmum:103330196|K15095 (+)-neomenthol dehydrogenase [EC:1.1.1.208] | (RefSeq) (+)-neomenthol dehydrogenase-like isoform X2	Monoterpenoid biosynthesis (ko00902)	[Q]	Secondary metabolites biosynthesis, transport and catabolism	short chain dehydrogenase	(+)-neomenthol dehydrogenase OS=Arabidopsis thaliana OX=3702 GN=SDR1 PE=1 SV=1	Q	Secondary metabolites biosynthesis, transport and catabolism	PREDICTED: (+)-neomenthol dehydrogenase-like isoform X1 [Prunus mume]
PaF106G0100004891.01	618	471	573	1082	1126	1448	8.75966	7.75415	8.68185	16.6524	18.6659	20.3311	5.11327e-27	1.19536	up	[EH]	Amino acid transport and metabolism;; Coenzyme transport and metabolism	Biological Process: branched-chain amino acid biosynthetic process (GO:0009082);; Molecular Function: L-leucine transaminase activity (GO:0052654);; Molecular Function: L-valine transaminase activity (GO:0052655);; Molecular Function: L-isoleucine transaminase activity (GO:0052656);;	K00826|2.5e-98|pmum:103320512|K00826 branched-chain amino acid aminotransferase [EC:2.6.1.42] | (RefSeq) branched-chain-amino-acid aminotransferase 2, chloroplastic-like isoform X1	Cysteine and methionine metabolism (ko00270);; Valine, leucine and isoleucine degradation (ko00280);; Valine, leucine and isoleucine biosynthesis (ko00290);; Pantothenate and CoA biosynthesis (ko00770);; Glucosinolate biosynthesis (ko00966);; 2-Oxocarboxylic acid metabolism (ko01210);; Biosynthesis of amino acids (ko01230)	[E]	Amino acid transport and metabolism	--	Branched-chain-amino-acid aminotransferase 2, chloroplastic OS=Arabidopsis thaliana OX=3702 GN=BCAT2 PE=1 SV=1	E	Amino acid transport and metabolism	unnamed protein product [Prunus armeniaca]
PaF106G0600021550.01	693	634	671	29	27	31	8.37294	9.1498	8.42888	0.372451	0.370259	0.362104	3.24157e-105	-4.10218	down	[EF]	Amino acid transport and metabolism;; Nucleotide transport and metabolism	Molecular Function: carbamoyl-phosphate synthase (glutamine-hydrolyzing) activity (GO:0004088);; Cellular Component: cytoplasm (GO:0005737);; Cellular Component: carbamoyl-phosphate synthase complex (GO:0005951);; Biological Process: 'de novo' pyrimidine nucleobase biosynthetic process (GO:0006207);; Biological Process: arginine biosynthetic process (GO:0006526);; Biological Process: glutamine me…	K01956|8.1e-249|pmum:103341837|K01956 carbamoyl-phosphate synthase small subunit [EC:6.3.5.5] | (RefSeq) carbamoyl-phosphate synthase small chain, chloroplastic-like	Pyrimidine metabolism (ko00240);; Alanine, aspartate and glutamate metabolism (ko00250)	[R]	General function prediction only	Carbamoyl-phosphate synthase small chain, CPSase domain	Carbamoyl-phosphate synthase small chain, chloroplastic OS=Arabidopsis thaliana OX=3702 GN=CARA PE=1 SV=1	--	--	PREDICTED: carbamoyl-phosphate synthase small chain, chloroplastic-like [Prunus mume]
PaF106G0200008577.01	444	454	431	220	166	207	7.87573	9.33089	7.97477	5.05195	3.97966	4.41582	2.09235e-09	-1.02581	down	--	--	Biological Process: chromosome segregation (GO:0007059);; Molecular Function: microtubule binding (GO:0008017);; Biological Process: cell division (GO:0051301);;	K08341|5.9e-36|han:110930598|K08341 GABA(A) receptor-associated protein | (RefSeq) autophagy-related protein 8D-like	Autophagy - other (ko04136)	[S]	Function unknown	Spindle and kinetochore-associated protein 1	Spindle and kinetochore-associated protein 1 homolog OS=Arabidopsis thaliana OX=3702 GN=At3g60660 PE=2 SV=1	S	Function unknown	unnamed protein product [Prunus armeniaca]
PaF106G0300012159.01	2738	1998	2357	0	0	6	90.7273	79.2414	80.5704	0	0	0.173495	1.38886e-210	-7.75456	down	--	--	Molecular Function: polygalacturonase activity (GO:0004650);; Cellular Component: extracellular region (GO:0005576);; Biological Process: carbohydrate metabolic process (GO:0005975);; Biological Process: cell wall organization (GO:0071555);;	K01213|1.8e-76|pmum:103329198|K01213 galacturan 1,4-alpha-galacturonidase [EC:3.2.1.67] | (RefSeq) exopolygalacturonase-like	Pentose and glucuronate interconversions (ko00040)	--	--	Glycosyl hydrolases family 28	Exopolygalacturonase (Fragment) OS=Oenothera organensis OX=3945 PE=2 SV=1	G	Carbohydrate transport and metabolism	PREDICTED: exopolygalacturonase-like [Prunus mume]
PaF106G0600024884.01	85	94	70	357	363	505	0.501087	0.669559	0.425906	2.3166	2.6225	3.08535	6.28624e-30	2.19424	up	--	--	Cellular Component: integral component of membrane (GO:0016021);;	K13466|2.4e-13|spen:107024367|K13466 EIX receptor 1/2 | (RefSeq) receptor-like protein EIX2	Plant-pathogen interaction (ko04626)	[R]	General function prediction only	Leucine rich repeat	Receptor-like protein 6 OS=Arabidopsis thaliana OX=3702 GN=RLP6 PE=3 SV=1	S	Function unknown	PREDICTED: receptor-like protein 12 isoform X1 [Prunus mume]
PaF106G0500018894.01	3	0	0	206	173	227	0.032455	0	0	3.60647	3.25742	3.66482	6.86474e-51	4.74799	up	[J]	Translation, ribosomal structure and biogenesis	Molecular Function: tyrosine-tRNA ligase activity (GO:0004831);; Molecular Function: ATP binding (GO:0005524);; Biological Process: tRNA aminoacylation for protein translation (GO:0006418);;	K01866|4.6e-211|pavi:110768363|K01866 tyrosyl-tRNA synthetase [EC:6.1.1.1] | (RefSeq) tyrosine--tRNA ligase 1, cytoplasmic-like	Aminoacyl-tRNA biosynthesis (ko00970)	[J]	Translation, ribosomal structure and biogenesis	tRNA synthetases class I (W and Y)	Tyrosine--tRNA ligase 1, cytoplasmic OS=Arabidopsis thaliana OX=3702 GN=At2g33840 PE=2 SV=1	J	Translation, ribosomal structure and biogenesis	unnamed protein product [Prunus armeniaca]
PaF106G0800029849.01	23	49	48	106	112	94	0.447345	1.15972	0.975355	2.31826	2.62491	1.8781	0.000372758	1.1481	up	[Q]	Secondary metabolites biosynthesis, transport and catabolism	Molecular Function: metal ion binding (GO:0046872);; Molecular Function: dioxygenase activity (GO:0051213);;	K13229|4.3e-75|ats:109766943|K13229 2,4-dihydroxy-1,4-benzoxazin-3-one-glucoside dioxygenase [EC:1.14.11.59] | (RefSeq) LOC109766943; DIBOA-glucoside dioxygenase BX6-like	Benzoxazinoid biosynthesis (ko00402)	[QR]	Secondary metabolites biosynthesis, transport and catabolism;; General function prediction only	2OG-Fe(II) oxygenase superfamily	1-aminocyclopropane-1-carboxylate oxidase homolog 1 OS=Arabidopsis thaliana OX=3702 GN=At1g06620 PE=2 SV=1	Q	Secondary metabolites biosynthesis, transport and catabolism	PREDICTED: 1-aminocyclopropane-1-carboxylate oxidase homolog 1-like [Prunus mume]
PaF106G0200007569.01	3924	4653	5091	260	149	260	11.6656	16.5562	15.6602	0.836246	0.513011	0.770295	3.97192e-146	-4.07214	down	--	--	Biological Process: signal transduction (GO:0007165);; Molecular Function: ADP binding (GO:0043531);;	K00695|2.6e-155|mtr:MTR_6g478030|K00695 sucrose synthase [EC:2.4.1.13] | (RefSeq) sucrose synthase	Starch and sucrose metabolism (ko00500)	--	--	TIR domain	TMV resistance protein N OS=Nicotiana glutinosa OX=35889 GN=N PE=1 SV=1	T	Signal transduction mechanisms	PREDICTED: TMV resistance [Prunus dulcis]
PaF106G0400016408.01	330	346	345	69	101	131	5.07492	6.54801	5.55703	1.077	1.7312	1.93481	2.49977e-13	-1.54764	down	[Q]	Secondary metabolites biosynthesis, transport and catabolism	Molecular Function: oxidoreductase activity (GO:0016491);; Molecular Function: metal ion binding (GO:0046872);;	K05658|4.1e-116|cpep:111781709|K05658 ATP-binding cassette, subfamily B (MDR/TAP), member 1 [EC:7.6.2.2] | (RefSeq) uncharacterized protein LOC111781709	ABC transporters (ko02010)	[QR]	Secondary metabolites biosynthesis, transport and catabolism;; General function prediction only	non-haem dioxygenase in morphine synthesis N-terminal	Protein SRG1 OS=Arabidopsis thaliana OX=3702 GN=SRG1 PE=2 SV=1	Q	Secondary metabolites biosynthesis, transport and catabolism	unnamed protein product [Prunus armeniaca]
PaF106G0100002664.01	325	230	218	0	0	0	3.99195	3.38656	2.75909	0	0	0	1.71426e-56	-5.08924	down	--	--	Biological Process: defense response (GO:0006952);; Molecular Function: ADP binding (GO:0043531);;	K13457|1.8e-53|mtr:MTR_3g055830|K13457 disease resistance protein RPM1 | (RefSeq) disease resistance protein (CC-NBS-LRR class) family protein	Plant-pathogen interaction (ko04626)	[T]	Signal transduction mechanisms	Leucine Rich repeats (2 copies)	Probable disease resistance RPP8-like protein 2 OS=Arabidopsis thaliana OX=3702 GN=RPP8L2 PE=3 SV=1	T	Signal transduction mechanisms	PREDICTED: putative disease resistance protein At1g50180 [Prunus mume]
PaF106G0100006325.01	226	125	178	20	32	30	7.06744	4.7064	5.87036	0.65968	1.24766	0.94562	1.9871e-15	-2.17114	down	--	--	Molecular Function: GTP binding (GO:0005525);; Cellular Component: nucleus (GO:0005634);; Biological Process: ribosome biogenesis (GO:0042254);;	K14569|3.1e-09|cic:CICLE_v10018567mg|K14569 ribosome biogenesis protein BMS1 | (RefSeq) hypothetical protein	Ribosome biogenesis in eukaryotes (ko03008)	--	--	--	--	--	--	hypothetical protein FH972_015221 [Carpinus fangiana]
PaF106G0200010293.01	694	712	786	1566	1750	1718	8.6973	11.0444	10.2073	22.0086	25.6047	21.7317	1.11332e-24	1.25221	up	[G]	Carbohydrate transport and metabolism	Molecular Function: trehalose-phosphatase activity (GO:0004805);; Biological Process: trehalose biosynthetic process (GO:0005992);;	K01087|8.9e-226|pavi:110764757|K01087 trehalose 6-phosphate phosphatase [EC:3.1.3.12] | (RefSeq) trehalose-phosphate phosphatase A isoform X1	Starch and sucrose metabolism (ko00500)	[G]	Carbohydrate transport and metabolism	Trehalose-phosphatase	Trehalose-phosphate phosphatase A OS=Arabidopsis thaliana OX=3702 GN=TPPA PE=1 SV=1	G	Carbohydrate transport and metabolism	Haloacid dehalogenase-like hydrolase superfamily protein [Prunus dulcis]
PaF106G0600025398.01	2089	1725	1891	461	537	593	14.4713	14.2789	13.5055	3.47976	4.37339	4.10066	3.55646e-62	-1.71815	down	--	--	Molecular Function: oxidoreductase activity, acting on single donors with incorporation of molecular oxygen, incorporation of two atoms of oxygen (GO:0016702);; Biological Process: oxylipin biosynthetic process (GO:0031408);; Molecular Function: metal ion binding (GO:0046872);;	K15718|0.0e+00|pmum:103344101|K15718 linoleate 9S-lipoxygenase [EC:1.13.11.58] | (RefSeq) probable linoleate 9S-lipoxygenase 5	Linoleic acid metabolism (ko00591)	--	--	Lipoxygenase	Probable linoleate 9S-lipoxygenase 5 OS=Solanum tuberosum OX=4113 GN=LOX1.5 PE=2 SV=1	E	Amino acid transport and metabolism	PREDICTED: probable linoleate 9S-lipoxygenase 5 [Prunus mume]
PaF106G0700028234.01	131	89	109	14	16	35	2.97043	2.43875	3.09294	0.338587	0.416383	0.785358	9.68627e-09	-1.78732	down	--	--	Biological Process: lipid metabolic process (GO:0006629);; Cellular Component: integral component of membrane (GO:0016021);; Molecular Function: oxidoreductase activity (GO:0016491);; Molecular Function: oxidoreductase activity, acting on the CH-CH group of donors (GO:0016627);;	K09591|5.4e-17|gra:105779649|K09591 steroid 5-alpha-reductase [EC:1.3.1.22] | (RefSeq) steroid 5-alpha-reductase DET2	Brassinosteroid biosynthesis (ko00905)	[I]	Lipid transport and metabolism	3-oxo-5-alpha-steroid 4-dehydrogenase	Polyprenol reductase 1 OS=Arabidopsis thaliana OX=3702 GN=PPRD1 PE=1 SV=1	I	Lipid transport and metabolism	PREDICTED: very-long-chain enoyl-CoA reductase-like [Prunus mume]
PaF106G0300011999.01	21	38	9	61	70	121	0.19712	0.429776	0.08907	0.632735	0.781433	1.16852	0.000362394	1.30973	up	[C]	Energy production and conversion	Molecular Function: isocitrate lyase activity (GO:0004451);; Biological Process: carboxylic acid metabolic process (GO:0019752);; Molecular Function: metal ion binding (GO:0046872);;	K01637|0.0e+00|pmum:103329397|K01637 isocitrate lyase [EC:4.1.3.1] | (RefSeq) isocitrate lyase isoform X1	Glyoxylate and dicarboxylate metabolism (ko00630);; Carbon metabolism (ko01200)	[C]	Energy production and conversion	Isocitrate lyase family	Isocitrate lyase OS=Gossypium hirsutum OX=3635 PE=2 SV=1	C	Energy production and conversion	isocitrate lyase [Prunus sibirica]
PaF106G0400016586.01	230	288	191	4	0	16	3.538	5.30272	3.02617	0.058305	0	0.244563	0.00163264	-1.17428	down	--	--	Molecular Function: transferase activity, transferring acyl groups other than amino-acyl groups (GO:0016747);;	K13065|3.5e-109|pavi:110771447|K13065 shikimate O-hydroxycinnamoyltransferase [EC:2.3.1.133] | (RefSeq) BAHD acyltransferase At5g47980-like	Phenylpropanoid biosynthesis (ko00940);; Flavonoid biosynthesis (ko00941);; Stilbenoid, diarylheptanoid and gingerol biosynthesis (ko00945)	--	--	Transferase family	Stemmadenine O-acetyltransferase OS=Catharanthus roseus OX=4058 GN=SAT PE=1 SV=1	S	Function unknown	PREDICTED: vinorine synthase-like [Prunus mume]
PaF106G0100001230.01	28	16	23	83	85	105	0.127794	0.086343	0.113006	0.435016	0.586145	0.585646	1.21376e-08	1.71295	up	[V]	Defense mechanisms	Molecular Function: ATP binding (GO:0005524);; Cellular Component: integral component of membrane (GO:0016021);; Molecular Function: ATPase activity (GO:0016887);; Molecular Function: ATPase activity, coupled to transmembrane movement of substances (GO:0042626);;	K05658|0.0e+00|pper:18789915|K05658 ATP-binding cassette, subfamily B (MDR/TAP), member 1 [EC:7.6.2.2] | (RefSeq) ABC transporter B family member 11	ABC transporters (ko02010)	[Q]	Secondary metabolites biosynthesis, transport and catabolism	ABC transporter transmembrane region	ABC transporter B family member 11 OS=Arabidopsis thaliana OX=3702 GN=ABCB11 PE=2 SV=1	Q	Secondary metabolites biosynthesis, transport and catabolism	unnamed protein product [Prunus armeniaca]
PaF106G0200007395.01	361	424	330	1005	902	1230	1.68782	2.39106	1.58363	5.08813	5.00442	5.82514	5.56999e-24	1.49635	up	[R]	General function prediction only	Molecular Function: ADP binding (GO:0043531);;	K12818|7.4e-213|mtr:MTR_0267s0070|K12818 ATP-dependent RNA helicase DHX8/PRP22 [EC:3.6.4.13] | (RefSeq) NB-ARC domain disease resistance protein, putative	Spliceosome (ko03040)	[T]	Signal transduction mechanisms	NB-ARC domain	Putative disease resistance RPP13-like protein 1 OS=Arabidopsis thaliana OX=3702 GN=RPPL1 PE=3 SV=1	T	Signal transduction mechanisms	PREDICTED: LOW QUALITY PROTEIN: putative disease resistance RPP13-like protein 1 [Prunus mume]
PaF106G0100005517.01	1682	1026	1465	2051	2791	3298	24.2904	17.727	21.8115	32.2318	47.0332	47.6727	5.94516e-12	1.01763	up	--	--	--	K12472|3.6e-29|cqi:110701739|K12472 epidermal growth factor receptor substrate 15 | (RefSeq) GATA zinc finger domain-containing protein 14-like	Endocytosis (ko04144)	--	--	BURP domain	BURP domain-containing protein 3 OS=Oryza sativa subsp. japonica OX=39947 GN=BURP3 PE=2 SV=1	S	Function unknown	PREDICTED: BURP domain protein RD22-like [Prunus mume]
PaF106G0400015359.01	78	50	96	21	14	31	0.799068	0.610901	1.00711	0.227314	0.156999	0.308802	0.000212144	-1.2627	down	--		Biological Process: defense response to oomycetes (GO:0002229);; Molecular Function: transmembrane receptor protein serine/threonine kinase activity (GO:0004675);; Molecular Function: ATP binding (GO:0005524);; Cellular Component: plasma membrane (GO:0005886);; Biological Process: defense response (GO:0006952);; Molecular Function: carbohydrate binding (GO:0030246);; Biological Process: defense r…	K22133|1.3e-94|egr:104443802|K22133 oxalate---CoA ligase [EC:6.2.1.8] | (RefSeq) oxalate--CoA ligase	Glyoxylate and dicarboxylate metabolism (ko00630)	--	--	Legume lectin domain	L-type lectin-domain containing receptor kinase IX.1 OS=Arabidopsis thaliana OX=3702 GN=LECRK91 PE=1 SV=1	T	Signal transduction mechanisms	PREDICTED: L-type lectin-domain containing receptor kinase IX.1-like isoform X1 [Prunus mume]
PaF106G0600024932.01	71	23	32	85	82	118	0.970083	0.36334	0.441694	1.26903	1.30571	1.62383	0.00261652	1.00276	up	--	--	Molecular Function: protein serine/threonine phosphatase activity (GO:0004722);;	K14497|7.1e-26|rcu:8274369|K14497 protein phosphatase 2C [EC:3.1.3.16] | (RefSeq) probable protein phosphatase 2C 51	MAPK signaling pathway - plant (ko04016);; Plant hormone signal transduction (ko04075)	[T]	Signal transduction mechanisms	Protein phosphatase 2C	Probable protein phosphatase 2C 65 OS=Arabidopsis thaliana OX=3702 GN=At5g01700 PE=2 SV=1	T	Signal transduction mechanisms	PREDICTED: probable protein phosphatase 2C 65 isoform X1 [Prunus mume]
PaF106G0100004522.01	564	228	318	106	109	124	13.2581	6.43486	7.65066	2.67363	3.14818	2.88761	6.73612e-09	-1.41233	down	--	--	Biological Process: protein polyubiquitination (GO:0000209);; Molecular Function: ATP binding (GO:0005524);; Cellular Component: nucleus (GO:0005634);; Molecular Function: NEDD8 transferase activity (GO:0019788);; Biological Process: protein neddylation (GO:0045116);; Molecular Function: ubiquitin conjugating enzyme activity (GO:0061631);;	K10579|3.4e-103|pper:18789696|K10579 ubiquitin-conjugating enzyme E2 M [EC:2.3.2.34] | (RefSeq) probable NEDD8-conjugating enzyme Ubc12-like isoform X2	Ubiquitin mediated proteolysis (ko04120)	[O]	Posttranslational modification, protein turnover, chaperones	Ubiquitin-conjugating enzyme	Probable NEDD8-conjugating enzyme Ubc12-like OS=Arabidopsis thaliana OX=3702 GN=RCE2 PE=2 SV=1	O	Posttranslational modification, protein turnover, chaperones	unnamed protein product [Prunus armeniaca]
PaF106G0200009803.01	16002	12071	16688	34932	34661	36722	206.262	186.204	221.886	490.07	521.529	473.924	7.09206e-48	1.32553	up	--	--	Molecular Function: hydrolase activity, hydrolyzing O-glycosyl compounds (GO:0004553);; Biological Process: carbohydrate metabolic process (GO:0005975);;	K19891|2.5e-76|bna:106401262|K19891 glucan endo-1,3-beta-glucosidase 1/2/3 [EC:3.2.1.39] | (RefSeq) glucan endo-1,3-beta-glucosidase 3	Starch and sucrose metabolism (ko00500)	--	--	Glycosyl hydrolases family 17	Glucan endo-1,3-beta-glucosidase OS=Triticum aestivum OX=4565 GN=GLC1 PE=2 SV=1	G	Carbohydrate transport and metabolism	unnamed protein product [Prunus armeniaca]
PaF106G0500019669.01	148	100	122	312	269	291	1.00254	0.811442	0.855608	2.30861	2.13489	1.97753	6.92027e-11	1.24686	up	[P]	Inorganic ion transport and metabolism	Molecular Function: copper ion binding (GO:0005507);; Molecular Function: ATP binding (GO:0005524);; Cellular Component: integral component of membrane (GO:0016021);; Molecular Function: copper-transporting ATPase activity (GO:0043682);;	K17686|0.0e+00|pavi:110758031|K17686 P-type Cu+ transporter [EC:7.2.2.8] | (RefSeq) probable copper-transporting ATPase HMA5	MAPK signaling pathway - plant (ko04016)	[P]	Inorganic ion transport and metabolism	E1-E2 ATPase	Probable copper-transporting ATPase HMA5 OS=Arabidopsis thaliana OX=3702 GN=HMA5 PE=1 SV=2	P	Inorganic ion transport and metabolism	probable copper-transporting ATPase HMA5 [Prunus avium]
PaF106G0500020327.01	7215	5088	7302	2802	2326	3049	103.334	87.2096	107.867	43.6707	38.8867	43.7213	3.91998e-28	-1.14539	down	[IR]	Lipid transport and metabolism;; General function prediction only	Molecular Function: hydrolase activity, acting on ester bonds (GO:0016788);;	K01206|1.5e-39|boe:106299976|K01206 alpha-L-fucosidase [EC:3.2.1.51] | (RefSeq) alpha-L-fucosidase 3	Other glycan degradation (ko00511)	--	--	GDSL-like Lipase/Acylhydrolase	GDSL esterase/lipase At3g48460 OS=Arabidopsis thaliana OX=3702 GN=At3g48460 PE=2 SV=1	S	Function unknown	unnamed protein product [Prunus armeniaca]
PaF106G0300013116.01	29	8	6	125	95	176	0.496048	0.150029	0.093292	2.39514	1.95487	3.1172	1.82888e-12	2.37103	up	[H]	Coenzyme transport and metabolism	Molecular Function: O-methyltransferase activity (GO:0008171);; Molecular Function: S-adenosylmethionine-dependent methyltransferase activity (GO:0008757);; Biological Process: aromatic compound biosynthetic process (GO:0019438);; Biological Process: methylation (GO:0032259);; Molecular Function: protein dimerization activity (GO:0046983);;	K16040|3.1e-154|pmum:103328492|K16040 trans-resveratrol di-O-methyltransferase [EC:2.1.1.240] | (RefSeq) trans-resveratrol di-O-methyltransferase-like	Stilbenoid, diarylheptanoid and gingerol biosynthesis (ko00945)	[R]	General function prediction only	O-methyltransferase domain	Probable O-methyltransferase 3 OS=Humulus lupulus OX=3486 GN=OMT3 PE=2 SV=1	S	Function unknown	trans-resveratrol di-O-methyltransferase-like [Prunus persica]
PaF106G0800032154.01	40	33	37	123	119	139	0.223161	0.216706	0.208139	0.744409	0.771588	0.777069	2.83444e-10	1.63024	up	[R]	General function prediction only	Biological Process: signal transduction (GO:0007165);; Molecular Function: ADP binding (GO:0043531);;	K00695|7.3e-127|mtr:MTR_6g478030|K00695 sucrose synthase [EC:2.4.1.13] | (RefSeq) sucrose synthase	Starch and sucrose metabolism (ko00500)	--	--	TIR domain	TMV resistance protein N OS=Nicotiana glutinosa OX=35889 GN=N PE=1 SV=1	S	Function unknown	TMV resistance protein N [Prunus persica]
PaF106G0600023102.01	428	256	315	42	63	45	5.21281	3.7289	3.95261	0.546058	0.893436	0.542097	7.78055e-24	-2.33293	down	--		Molecular Function: protein kinase activity (GO:0004672);; Molecular Function: ATP binding (GO:0005524);; Cellular Component: integral component of membrane (GO:0016021);;	K13416|3.1e-46|egr:104419928|K13416 brassinosteroid insensitive 1-associated receptor kinase 1 [EC:2.7.10.1 2.7.11.1] | (RefSeq) BRASSINOSTEROID INSENSITIVE 1-associated receptor kinase 1	MAPK signaling pathway - plant (ko04016);; Plant hormone signal transduction (ko04075);; Plant-pathogen interaction (ko04626)	[T]	Signal transduction mechanisms	Protein kinase domain	Rust resistance kinase Lr10 OS=Triticum aestivum OX=4565 GN=LRK10 PE=2 SV=1	T	Signal transduction mechanisms	rust resistance kinase Lr10-like isoform X1 [Prunus avium]
PaF106G0600022159.01	473	305	348	129	117	104	8.29301	6.39994	6.29099	2.4586	2.3862	1.82532	3.35294e-13	-1.45685	down	--	--	Molecular Function: UDP-glycosyltransferase activity (GO:0008194);;	K13493|3.2e-25|ath:AT5G05870|K13493 cytokinin-N-glucosyltransferase [EC:2.4.1.-] | (RefSeq) UGT76C1; UDP-glucosyl transferase 76C1	Zeatin biosynthesis (ko00908)	[GC]	Carbohydrate transport and metabolism;; Energy production and conversion	UDP-glucoronosyl and UDP-glucosyl transferase	UDP-glycosyltransferase 76E4 OS=Arabidopsis thaliana OX=3702 GN=UGT76E4 PE=2 SV=1	--	--	UDP-glycosyltransferase 76E2-like isoform X1 [Prunus avium]
PaF106G0200008436.01	57	34	37	259	364	397	0.325144	0.239773	0.218787	1.91812	2.4929	2.34039	1.8966e-34	2.76257	up	[R]	General function prediction only	Biological Process: signal transduction (GO:0007165);; Molecular Function: ADP binding (GO:0043531);;	K00695|7.7e-116|mtr:MTR_6g478030|K00695 sucrose synthase [EC:2.4.1.13] | (RefSeq) sucrose synthase	Starch and sucrose metabolism (ko00500)	--	--	TIR domain	Disease resistance protein RUN1 OS=Vitis rotundifolia OX=103349 GN=RUN1 PE=1 SV=1	S	Function unknown	PREDICTED: TMV resistance protein N-like [Prunus mume]
PaF106G0200008837.01	267	198	124	18	22	36	1.78387	1.57781	0.854015	0.123889	0.166074	0.237894	1.62836e-15	-2.33092	down	--	--	Cellular Component: integral component of membrane (GO:0016021);;	K13466|1.8e-263|pper:18785913|K13466 EIX receptor 1/2 | (RefSeq) LRR receptor-like serine/threonine-protein kinase GSO2 isoform X1	Plant-pathogen interaction (ko04626)	[R]	General function prediction only	Leucine rich repeat	Receptor-like protein EIX2 OS=Solanum lycopersicum OX=4081 GN=EIX2 PE=1 SV=2	P	Inorganic ion transport and metabolism	disease resistance family protein / LRR family protein [Prunus dulcis]
PaF106G0200009651.01	15	12	11	73	59	62	0.097049	0.098066	0.078207	0.545123	0.475582	0.427864	9.57128e-08	1.79715	up	--	--	Molecular Function: ion channel activity (GO:0005216);; Cellular Component: integral component of membrane (GO:0016021);;	K05391|7.1e-304|pper:18787509|K05391 cyclic nucleotide gated channel, plant | (RefSeq) cyclic nucleotide-gated ion channel 1 isoform X1	Plant-pathogen interaction (ko04626)	[PT]	Inorganic ion transport and metabolism;; Signal transduction mechanisms	Cyclic nucleotide-binding domain	Cyclic nucleotide-gated ion channel 1 OS=Arabidopsis thaliana OX=3702 GN=CNGC1 PE=1 SV=1	U	Intracellular trafficking, secretion, and vesicular transport	cyclic nucleotide-gated ion channel 1-like isoform X3 [Prunus dulcis]
PaF106G0300014138.01	12	10	6	146	115	172	0.06008	0.058769	0.032052	0.853126	0.716484	0.922785	2.13702e-26	3.15286	up	--	--	Cellular Component: integral component of membrane (GO:0016021);; Molecular Function: ADP binding (GO:0043531);;	K13457|4.0e-43|qsu:112007111|K13457 disease resistance protein RPM1 | (RefSeq) disease resistance protein RPM1-like	Plant-pathogen interaction (ko04626)	[T]	Signal transduction mechanisms	NB-ARC domain	Probable disease resistance RPP8-like protein 2 OS=Arabidopsis thaliana OX=3702 GN=RPP8L2 PE=3 SV=1	T	Signal transduction mechanisms	unnamed protein product [Prunus armeniaca]
PaF106G0100000986.01	163	139	104	292	287	247	1.65432	1.69811	1.0901	3.24284	3.41898	2.52326	4.11754e-06	1.02425	up	[J]	Translation, ribosomal structure and biogenesis	Molecular Function: tRNA binding (GO:0000049);; Molecular Function: lysine-tRNA ligase activity (GO:0004824);; Molecular Function: ATP binding (GO:0005524);; Cellular Component: cytosol (GO:0005829);; Biological Process: lysyl-tRNA aminoacylation (GO:0006430);; Cellular Component: integral component of membrane (GO:0016021);;	K04567|0.0e+00|pper:18791418|K04567 lysyl-tRNA synthetase, class II [EC:6.1.1.6] | (RefSeq) lysine--tRNA ligase, cytoplasmic isoform X1	Aminoacyl-tRNA biosynthesis (ko00970)	[J]	Translation, ribosomal structure and biogenesis	tRNA synthetases class II (D, K and N)	Lysine--tRNA ligase, cytoplasmic OS=Arabidopsis thaliana OX=3702 GN=At3g11710 PE=1 SV=1	J	Translation, ribosomal structure and biogenesis	lysine--tRNA ligase, cytoplasmic isoform X2 [Prunus persica]
PaF106G0100000244.01	217	413	322	714	552	889	1.35537	3.09731	2.08288	4.88561	4.05282	5.59313	8.59587e-07	1.109	up	[R]	General function prediction only	Biological Process: signal transduction (GO:0007165);; Molecular Function: ADP binding (GO:0043531);;	K00695|2.7e-163|mtr:MTR_6g478030|K00695 sucrose synthase [EC:2.4.1.13] | (RefSeq) sucrose synthase	Starch and sucrose metabolism (ko00500)	--	--	TIR domain	Disease resistance protein RPV1 OS=Vitis rotundifolia OX=103349 GN=RPV1 PE=1 SV=1	T	Signal transduction mechanisms	PREDICTED: TMV resistance protein N-like [Prunus mume]
PaF106G0800032607.01	112	123	104	16	37	60	0.597114	0.784997	0.57252	0.092009	0.23022	0.318647	0.000347205	-1.18544	down	[R]	General function prediction only	Biological Process: signal transduction (GO:0007165);; Molecular Function: ADP binding (GO:0043531);;	K00695|1.8e-123|mtr:MTR_6g478030|K00695 sucrose synthase [EC:2.4.1.13] | (RefSeq) sucrose synthase	Starch and sucrose metabolism (ko00500)	--	--	TIR domain	TMV resistance protein N OS=Nicotiana glutinosa OX=35889 GN=N PE=1 SV=1	S	Function unknown	PREDICTED: TMV resistance protein N-like [Prunus mume]
PaF106G0600022655.01	93	141	149	327	249	375	4.43696	8.06803	7.33109	17.0568	13.9501	17.9947	4.82468e-08	1.24119	up	--	--	Biological Process: response to auxin (GO:0009733);;	K14488|8.1e-60|pavi:110755469|K14488 SAUR family protein | (RefSeq) auxin-responsive protein SAUR50-like	Plant hormone signal transduction (ko04075)	--	--	Auxin responsive protein	Auxin-responsive protein SAUR50 OS=Arabidopsis thaliana OX=3702 GN=SAUR50 PE=1 SV=1	S	Function unknown	unnamed protein product [Prunus armeniaca]
PaF106G0200009654.01	345	223	315	38	42	51	6.47478	5.00101	6.09429	0.762908	0.95694	0.967804	5.13405e-28	-2.39917	down	[M]	Cell wall/membrane/envelope biogenesis	Molecular Function: protein kinase activity (GO:0004672);; Molecular Function: ATP binding (GO:0005524);;	K05391|6.6e-21|pper:18792510|K05391 cyclic nucleotide gated channel, plant | (RefSeq) cyclic nucleotide-gated ion channel 1 isoform X1	Plant-pathogen interaction (ko04626)	--	--	Protein kinase domain	Wall-associated receptor kinase 3 OS=Arabidopsis thaliana OX=3702 GN=WAK3 PE=2 SV=2	T	Signal transduction mechanisms	wall-associated receptor kinase 3-like [Prunus yedoensis var. nudiflora]
PaF106G0600021946.01	139	96	114	20	12	48	2.90277	2.41206	2.47215	0.441434	0.286058	0.997989	1.57505e-06	-1.57922	down	--	--	Cellular Component: nucleus (GO:0005634);; Biological Process: regulation of transcription, DNA-templated (GO:0006355);;	K12135|3.9e-06|thj:104802991|K12135 zinc finger protein CONSTANS | (RefSeq) zinc finger protein CONSTANS-LIKE 2-like	Circadian rhythm - plant (ko04712)	[K]	Transcription	CCT motif	Protein CHLOROPLAST IMPORT APPARATUS 2 OS=Arabidopsis thaliana OX=3702 GN=CIA2 PE=1 SV=1	K	Transcription	unnamed protein product [Prunus armeniaca]
PaF106G0300014581.01	6722	2605	3292	13024	13754	11448	67.0654	31.0962	33.8754	141.419	160.173	114.35	6.68976e-05	1.32811	up	[GI]	Carbohydrate transport and metabolism;; Lipid transport and metabolism	Molecular Function: enzyme inhibitor activity (GO:0004857);; Cellular Component: integral component of membrane (GO:0016021);; Molecular Function: pectinesterase activity (GO:0030599);; Biological Process: cell wall modification (GO:0042545);; Molecular Function: aspartyl esterase activity (GO:0045330);; Biological Process: pectin catabolic process (GO:0045490);;	K01051|0.0e+00|pmum:103327267|K01051 pectinesterase [EC:3.1.1.11] | (RefSeq) pectinesterase	Pentose and glucuronate interconversions (ko00040)	--	--	Pectinesterase	Pectinesterase 4 OS=Arabidopsis thaliana OX=3702 GN=PME4 PE=2 SV=1	G	Carbohydrate transport and metabolism	unnamed protein product [Prunus armeniaca]
PaF106G0800032576.01	62	41	51	291	157	310	1.1453	0.850635	0.843802	5.77375	3.25958	5.69557	8.16492e-17	2.07741	up	[P]	Inorganic ion transport and metabolism	Molecular Function: carbonate dehydratase activity (GO:0004089);; Molecular Function: zinc ion binding (GO:0008270);; Biological Process: cyanate catabolic process (GO:0009440);; Biological Process: carbon utilization (GO:0015976);;	K01673|1.5e-144|pmum:103341852|K01673 carbonic anhydrase [EC:4.2.1.1] | (RefSeq) carbonic anhydrase 2-like	Nitrogen metabolism (ko00910)	[P]	Inorganic ion transport and metabolism	Carbonic anhydrase	Beta carbonic anhydrase 2, chloroplastic OS=Arabidopsis thaliana OX=3702 GN=BCA2 PE=1 SV=3	P	Inorganic ion transport and metabolism	unnamed protein product [Prunus armeniaca]
PaF106G0600022891.01	1013	623	652	1185	2074	1657	6.81142	4.97631	4.59524	8.56026	16.0339	11.0716	0.000460436	1.02157	up	[T]	Signal transduction mechanisms	Molecular Function: protein serine/threonine kinase activity (GO:0004674);; Molecular Function: ATP binding (GO:0005524);; Cellular Component: plasma membrane (GO:0005886);; Biological Process: protein autophosphorylation (GO:0046777);;	K13416|1.0e-44|cam:101506449|K13416 brassinosteroid insensitive 1-associated receptor kinase 1 [EC:2.7.10.1 2.7.11.1] | (RefSeq) BRASSINOSTEROID INSENSITIVE 1-associated receptor kinase 1	MAPK signaling pathway - plant (ko04016);; Plant hormone signal transduction (ko04075);; Plant-pathogen interaction (ko04626)	--	--	Protein tyrosine and serine/threonine kinase	Probable LRR receptor-like serine/threonine-protein kinase At1g53430 OS=Arabidopsis thaliana OX=3702 GN=At1g53430 PE=1 SV=1	T	Signal transduction mechanisms	PREDICTED: probable LRR receptor-like serine/threonine-protein kinase At1g53420 [Prunus mume]
PaF106G0200008354.01	49	34	27	221	254	210	0.290944	0.293786	0.162073	1.7599	1.97258	1.70033	9.79627e-22	2.38816	up	[R]	General function prediction only	Biological Process: signal transduction (GO:0007165);; Molecular Function: ADP binding (GO:0043531);;	K00695|1.1e-114|mtr:MTR_6g478030|K00695 sucrose synthase [EC:2.4.1.13] | (RefSeq) sucrose synthase	Starch and sucrose metabolism (ko00500)	--	--	TIR domain	Disease resistance protein RUN1 OS=Vitis rotundifolia OX=103349 GN=RUN1 PE=1 SV=1	S	Function unknown	TMV resistance protein N isoform X1 [Prunus persica]
PaF106G0400016598.01	1140	878	995	1	2	3	14.0778	12.9004	12.6123	0.013228	0.025059	0.025432	1.72268e-139	-6.64688	down	--	--	Molecular Function: transferase activity, transferring acyl groups other than amino-acyl groups (GO:0016747);;	K13065|3.3e-94|pavi:110771447|K13065 shikimate O-hydroxycinnamoyltransferase [EC:2.3.1.133] | (RefSeq) BAHD acyltransferase At5g47980-like	Phenylpropanoid biosynthesis (ko00940);; Flavonoid biosynthesis (ko00941);; Stilbenoid, diarylheptanoid and gingerol biosynthesis (ko00945)	--	--	Transferase family	Salutaridinol 7-O-acetyltransferase OS=Papaver somniferum OX=3469 GN=SALAT PE=1 SV=1	S	Function unknown	PREDICTED: BAHD acyltransferase At5g47980-like [Prunus mume]
PaF106G0700026579.01	436	363	377	99	106	102	8.43112	8.39944	7.50679	2.06748	2.39252	1.9592	4.18794e-23	-1.73526	down	[R]	General function prediction only	Molecular Function: O-methyltransferase activity (GO:0008171);; Biological Process: methylation (GO:0032259);;	K00588|3.9e-131|pavi:110750978|K00588 caffeoyl-CoA O-methyltransferase [EC:2.1.1.104] | (RefSeq) probable caffeoyl-CoA O-methyltransferase At4g26220	Phenylpropanoid biosynthesis (ko00940);; Flavonoid biosynthesis (ko00941);; Stilbenoid, diarylheptanoid and gingerol biosynthesis (ko00945)	[Q]	Secondary metabolites biosynthesis, transport and catabolism	O-methyltransferase	Probable caffeoyl-CoA O-methyltransferase At4g26220 OS=Arabidopsis thaliana OX=3702 GN=At4g26220 PE=2 SV=1	Q	Secondary metabolites biosynthesis, transport and catabolism	probable caffeoyl-CoA O-methyltransferase At4g26220 [Prunus avium]
PaF106G0500021274.01	924	493	743	1619	1525	1989	17.3931	11.1012	14.4241	33.1661	33.5168	37.4807	1.09662e-19	1.29799	up	[T]	Signal transduction mechanisms	Molecular Function: acid phosphatase activity (GO:0003993);; Molecular Function: ferrous iron binding (GO:0008198);; Molecular Function: ferric iron binding (GO:0008199);; Cellular Component: integral component of membrane (GO:0016021);;	K14379|6.0e-191|pmum:103338913|K14379 tartrate-resistant acid phosphatase type 5 [EC:3.1.3.2] | (RefSeq) purple acid phosphatase 3-like	Riboflavin metabolism (ko00740)	[O]	Posttranslational modification, protein turnover, chaperones	Calcineurin-like phosphoesterase	Purple acid phosphatase 3 OS=Arabidopsis thaliana OX=3702 GN=PAP3 PE=2 SV=1	O	Posttranslational modification, protein turnover, chaperones	unnamed protein product [Prunus armeniaca]
PaF106G0500018895.01	16	15	17	68	69	94	0.849212	0.959015	0.957733	4.14521	4.49989	5.32259	1.11027e-08	1.81546	up	--	--	Biological Process: defense response (GO:0006952);; Molecular Function: ADP binding (GO:0043531);;	K13457|2.5e-46|pmum:103336813|K13457 disease resistance protein RPM1 | (RefSeq) disease resistance protein RPM1-like	Plant-pathogen interaction (ko04626)	--	--	--	--	T	Signal transduction mechanisms	unnamed protein product [Prunus armeniaca]
PaF106G0200007291.01	224	201	169	104	32	72	0.800094	0.867162	0.629193	0.40636	0.130397	0.257413	9.47261e-05	-1.17743	down	[R]	General function prediction only	Molecular Function: ADP binding (GO:0043531);;	K12818|8.0e-169|mtr:MTR_0267s0070|K12818 ATP-dependent RNA helicase DHX8/PRP22 [EC:3.6.4.13] | (RefSeq) NB-ARC domain disease resistance protein, putative	Spliceosome (ko03040)	[T]	Signal transduction mechanisms	NB-ARC domain	Putative disease resistance RPP13-like protein 1 OS=Arabidopsis thaliana OX=3702 GN=RPPL1 PE=3 SV=1	T	Signal transduction mechanisms	PREDICTED: LOW QUALITY PROTEIN: putative disease resistance RPP13-like protein 1 [Prunus mume]
PaF106G0200007733.01	402	314	368	72	63	74	8.09427	7.61716	7.56273	1.22008	1.48181	1.38147	6.39262e-31	-2.13116	down	--	--	Biological Process: lipid metabolic process (GO:0006629);; Cellular Component: integral component of membrane (GO:0016021);; Molecular Function: oxidoreductase activity, acting on the CH-CH group of donors (GO:0016627);;	K10258|9.3e-14|ccp:CHC_T00008438001|K10258 very-long-chain enoyl-CoA reductase [EC:1.3.1.93] | (RefSeq) trans-2-enoyl-CoA reductase (NADPH)	Fatty acid elongation (ko00062);; Biosynthesis of unsaturated fatty acids (ko01040);; Fatty acid metabolism (ko01212)	[I]	Lipid transport and metabolism	3-oxo-5-alpha-steroid 4-dehydrogenase	Steroid 5-alpha-reductase DET2 OS=Gossypium hirsutum OX=3635 GN=DET2 PE=1 SV=1	I	Lipid transport and metabolism	very-long-chain enoyl-CoA reductase-like isoform X1 [Prunus dulcis]
PaF106G0200008433.01	3	2	4	89	109	127	0.064056	0.035793	0.058478	1.68477	2.28736	2.43151	5.89237e-26	3.48807	up	--	--	Biological Process: signal transduction (GO:0007165);; Molecular Function: ADP binding (GO:0043531);;	K13459|8.6e-23|vvi:100265494|K13459 disease resistance protein RPS2 | (RefSeq) probable disease resistance protein At1g52660	Plant-pathogen interaction (ko04626)	--	--	TIR domain	Disease resistance protein RUN1 OS=Vitis rotundifolia OX=103349 GN=RUN1 PE=1 SV=1	S	Function unknown	disease resistance protein RUN1-like [Prunus dulcis]
PaF106G0200010395.01	115	100	69	13	9	4	1.53577	1.63577	0.989459	0.167191	0.173593	0.040799	1.53479e-11	-2.31655	down	--	--	Biological Process: fatty acid biosynthetic process (GO:0006633);; Cellular Component: membrane (GO:0016020);; Molecular Function: transferase activity, transferring acyl groups other than amino-acyl groups (GO:0016747);;	K15397|9.4e-189|pper:18786164|K15397 3-ketoacyl-CoA synthase [EC:2.3.1.199] | (RefSeq) 3-ketoacyl-CoA synthase 5	Fatty acid elongation (ko00062);; Plant-pathogen interaction (ko04626)	--	--	FAE1/Type III polyketide synthase-like protein	3-ketoacyl-CoA synthase 5 OS=Arabidopsis thaliana OX=3702 GN=KCS5 PE=2 SV=1	I	Lipid transport and metabolism	hypothetical protein PRUPE_2G285400 [Prunus persica]
PaF106G0600024634.01	506	410	465	849	859	1186	4.75955	4.60859	4.50726	8.69861	9.78282	11.7408	3.25514e-20	1.11697	up	[T]	Signal transduction mechanisms	Molecular Function: protein kinase activity (GO:0004672);; Molecular Function: ATP binding (GO:0005524);; Cellular Component: integral component of membrane (GO:0016021);; Molecular Function: carbohydrate binding (GO:0030246);;	K01176|1.1e-69|sbi:8065370|K01176 alpha-amylase [EC:3.2.1.1] | (RefSeq) alpha-amylase isozyme 2A	Starch and sucrose metabolism (ko00500)	--	--	Legume lectin domain	L-type lectin-domain containing receptor kinase IV.1 OS=Arabidopsis thaliana OX=3702 GN=LECRK41 PE=2 SV=1	T	Signal transduction mechanisms	PREDICTED: L-type lectin-domain containing receptor kinase IV.1-like [Prunus mume]
PaF106G0200008425.01	22	16	13	67	121	88	0.185629	0.160675	0.104951	0.60765	1.18548	0.741675	5.91887e-09	1.91032	up	[R]	General function prediction only	Biological Process: signal transduction (GO:0007165);; Molecular Function: ADP binding (GO:0043531);;	K00695|7.1e-81|mtr:MTR_6g478030|K00695 sucrose synthase [EC:2.4.1.13] | (RefSeq) sucrose synthase	Starch and sucrose metabolism (ko00500)	--	--	NB-ARC domain	Disease resistance protein RUN1 OS=Vitis rotundifolia OX=103349 GN=RUN1 PE=1 SV=1	--	--	TMV resistance protein N-like [Prunus avium]
PaF106G0800031951.01	5278	4577	5250	2233	2011	2206	54.6878	57.5557	56.3627	26.0303	25.1191	23.5679	5.76505e-40	-1.12099	down	[F]	Nucleotide transport and metabolism	Molecular Function: magnesium ion binding (GO:0000287);; Molecular Function: adenylosuccinate synthase activity (GO:0004019);; Molecular Function: GTP binding (GO:0005525);; Cellular Component: cytoplasm (GO:0005737);; Cellular Component: chloroplast (GO:0009507);; Biological Process: 'de novo' AMP biosynthetic process (GO:0044208);; Biological Process: IMP metabolic process (GO:0046040);;	K01939|5.6e-286|pper:18768320|K01939 adenylosuccinate synthase [EC:6.3.4.4] | (RefSeq) adenylosuccinate synthetase 2, chloroplastic	Purine metabolism (ko00230);; Alanine, aspartate and glutamate metabolism (ko00250)	[F]	Nucleotide transport and metabolism	Adenylosuccinate synthetase	Adenylosuccinate synthetase 2, chloroplastic OS=Ricinus communis OX=3988 GN=PURA2 PE=3 SV=1	F	Nucleotide transport and metabolism	unnamed protein product [Prunus armeniaca]
PaF106G0400016376.01	231	166	181	62	66	80	1.57084	1.3521	1.26813	0.453107	0.522118	0.545482	2.21724e-08	-1.2536	down	--		Molecular Function: protein kinase activity (GO:0004672);; Molecular Function: ATP binding (GO:0005524);; Cellular Component: integral component of membrane (GO:0016021);;	K13430|1.9e-68|sind:105176230|K13430 serine/threonine-protein kinase PBS1 [EC:2.7.11.1] | (RefSeq) probable serine/threonine-protein kinase PBL7 isoform X1	Plant-pathogen interaction (ko04626)	--	--	Protein tyrosine and serine/threonine kinase	Probable leucine-rich repeat receptor-like serine/threonine-protein kinase At3g14840 OS=Arabidopsis thaliana OX=3702 GN=LRR-RLK PE=1 SV=1	T	Signal transduction mechanisms	probable leucine-rich repeat receptor-like serine/threonine-protein kinase At3g14840 isoform X2 [Prunus persica]
PaF106G0500020568.01	44	113	138	283	205	276	0.445764	1.39191	1.46387	3.16386	2.46319	2.83635	0.000117303	1.16959	up	--	--	Molecular Function: ubiquitin-protein transferase activity (GO:0004842);;	K10260|1.9e-19|mpp:MICPUCDRAFT_56233|K10260 F-box and WD-40 domain protein 7 | (RefSeq) WD40 repeat protein	Ubiquitin mediated proteolysis (ko04120)	[S]	Function unknown	U-box domain	U-box domain-containing protein 18 OS=Arabidopsis thaliana OX=3702 GN=PUB18 PE=1 SV=1	S	Function unknown	unnamed protein product [Prunus armeniaca]
PaF106G0100004499.01	820	1034	918	429	302	475	18.0196	27.1795	20.8004	10.2545	7.72403	10.4388	3.46432e-10	-1.07726	down	[FV]	Nucleotide transport and metabolism;; Defense mechanisms	Molecular Function: magnesium ion binding (GO:0000287);; Molecular Function: dUTP diphosphatase activity (GO:0004170);; Biological Process: dUMP biosynthetic process (GO:0006226);; Biological Process: dUTP catabolic process (GO:0046081);;	K01520|1.8e-118|pmum:103320833|K01520 dUTP pyrophosphatase [EC:3.6.1.23] | (RefSeq) deoxyuridine 5'-triphosphate nucleotidohydrolase	Pyrimidine metabolism (ko00240)	[F]	Nucleotide transport and metabolism	dUTPase	Deoxyuridine 5'-triphosphate nucleotidohydrolase OS=Arabidopsis thaliana OX=3702 GN=DUT PE=1 SV=1	F	Nucleotide transport and metabolism	unnamed protein product [Prunus armeniaca]
PaF106G0400016590.01	1717	1159	1512	20	28	24	26.4761	21.3897	24.0398	0.334843	0.501049	0.357655	2.83194e-185	-5.38779	down	--	--	Molecular Function: transferase activity, transferring acyl groups other than amino-acyl groups (GO:0016747);;	K13065|4.7e-118|pavi:110771447|K13065 shikimate O-hydroxycinnamoyltransferase [EC:2.3.1.133] | (RefSeq) BAHD acyltransferase At5g47980-like	Phenylpropanoid biosynthesis (ko00940);; Flavonoid biosynthesis (ko00941);; Stilbenoid, diarylheptanoid and gingerol biosynthesis (ko00945)	--	--	Transferase family	BAHD acyltransferase BIA1 OS=Arabidopsis thaliana OX=3702 GN=BIA1 PE=2 SV=1	S	Function unknown	BAHD acyltransferase At5g47980-like [Prunus dulcis]
PaF106G0200006850.01	5	0	13	89	83	105	0.045784	0	0.13018	0.961573	0.96043	1.03951	2.99192e-13	2.58823	up	--	--	Molecular Function: oxidoreductase activity, acting on single donors with incorporation of molecular oxygen, incorporation of two atoms of oxygen (GO:0016702);; Biological Process: oxylipin biosynthetic process (GO:0031408);; Molecular Function: metal ion binding (GO:0046872);;	K00454|0.0e+00|pper:18784763|K00454 lipoxygenase [EC:1.13.11.12] | (RefSeq) linoleate 13S-lipoxygenase 2-1, chloroplastic	Linoleic acid metabolism (ko00591);; alpha-Linolenic acid metabolism (ko00592)	--	--	Lipoxygenase	Linoleate 13S-lipoxygenase 2-1, chloroplastic OS=Solanum tuberosum OX=4113 GN=LOX2.1 PE=1 SV=1	E	Amino acid transport and metabolism	linoleate 13S-lipoxygenase 2-1, chloroplastic-like [Prunus dulcis]
PaF106G0100006405.01	770	538	702	234	176	230	11.509	9.68738	10.8412	3.73634	3.05343	3.40919	1.04163e-22	-1.48933	down	--	--	Molecular Function: UDP-glycosyltransferase activity (GO:0008194);; Cellular Component: intracellular membrane-bounded organelle (GO:0043231);;	K22845|8.8e-243|pper:18789439|K22845 phlorizin synthase [EC:2.4.1.357] | (RefSeq) UDP-glycosyltransferase 88F5	Flavonoid biosynthesis (ko00941)	[GC]	Carbohydrate transport and metabolism;; Energy production and conversion	UDP-glucoronosyl and UDP-glucosyl transferase	UDP-glycosyltransferase 88F5 OS=Malus domestica OX=3750 GN=UGT88F5 PE=2 SV=1	--	--	unnamed protein product [Prunus armeniaca]
PaF106G0400017491.01	325	323	361	1231	1532	1930	2.23167	2.62097	2.47333	8.92741	12.0212	12.9298	2.2585e-57	2.20834	up	[M]	Cell wall/membrane/envelope biogenesis	Molecular Function: protein serine/threonine kinase activity (GO:0004674);; Molecular Function: ATP binding (GO:0005524);; Cellular Component: plasma membrane (GO:0005886);; Cellular Component: integral component of membrane (GO:0016021);; Biological Process: protein autophosphorylation (GO:0046777);;	K13416|1.4e-50|han:110928984|K13416 brassinosteroid insensitive 1-associated receptor kinase 1 [EC:2.7.10.1 2.7.11.1] | (RefSeq) BRASSINOSTEROID INSENSITIVE 1-associated receptor kinase 1-like isoform X1	MAPK signaling pathway - plant (ko04016);; Plant hormone signal transduction (ko04075);; Plant-pathogen interaction (ko04626)	--	--	Protein tyrosine and serine/threonine kinase	Probable LRR receptor-like serine/threonine-protein kinase At1g07650 OS=Arabidopsis thaliana OX=3702 GN=At1g07650 PE=1 SV=1	T	Signal transduction mechanisms	PREDICTED: probable leucine-rich repeat receptor-like serine/threonine-protein kinase At3g14840 [Prunus mume]
PaF106G0600024874.01	127	109	70	242	186	263	2.03131	2.07659	1.14827	4.71245	3.81299	4.5295	2.35066e-06	1.12389	up	--	--	Biological Process: response to molecule of bacterial origin (GO:0002237);; Molecular Function: molecular_function (GO:0003674);; Molecular Function: catalytic activity (GO:0003824);; Molecular Function: protein kinase activity (GO:0004672);; Molecular Function: protein serine/threonine kinase activity (GO:0004674);; Cellular Component: cellular_component (GO:0005575);; Cellular Component: cell (…	K22133|1.9e-10|egr:104443802|K22133 oxalate---CoA ligase [EC:6.2.1.8] | (RefSeq) oxalate--CoA ligase	Glyoxylate and dicarboxylate metabolism (ko00630)	[T]	Signal transduction mechanisms	Protein tyrosine and serine/threonine kinase	Cold-responsive protein kinase 1 OS=Arabidopsis thaliana OX=3702 GN=CRPK1 PE=1 SV=1	T	Signal transduction mechanisms	unnamed protein product [Prunus armeniaca]
PaF106G0700027524.01	2553	2291	2354	5684	4752	7509	35.4779	37.4183	32.785	85.1824	76.9135	103.929	2.76664e-40	1.36252	up	[QV]	Secondary metabolites biosynthesis, transport and catabolism;; Defense mechanisms	Molecular Function: monooxygenase activity (GO:0004497);; Molecular Function: iron ion binding (GO:0005506);; Cellular Component: integral component of membrane (GO:0016021);; Molecular Function: oxidoreductase activity, acting on paired donors, with incorporation or reduction of molecular oxygen (GO:0016705);; Molecular Function: heme binding (GO:0020037);;	K09843|1.4e-122|pmum:107881722|K09843 (+)-abscisic acid 8'-hydroxylase [EC:1.14.14.137] | (RefSeq) abscisic acid 8'-hydroxylase 4-like	Carotenoid biosynthesis (ko00906)	[QI]	Secondary metabolites biosynthesis, transport and catabolism;; Lipid transport and metabolism	Cytochrome P450	Abscisic acid 8'-hydroxylase 4 OS=Arabidopsis thaliana OX=3702 GN=CYP707A4 PE=2 SV=2	--	--	unnamed protein product [Prunus armeniaca]
PaF106G0600023441.01	588	360	351	137	153	191	4.84177	3.54713	2.97519	1.22463	1.4708	1.56901	4.87191e-10	-1.23979	down	--		Molecular Function: protein serine/threonine kinase activity (GO:0004674);; Molecular Function: ATP binding (GO:0005524);; Cellular Component: integral component of membrane (GO:0016021);;	K13420|4.1e-68|mesc:110601988|K13420 LRR receptor-like serine/threonine-protein kinase FLS2 [EC:2.7.11.1] | (RefSeq) LRR receptor-like serine/threonine-protein kinase FLS2	MAPK signaling pathway - plant (ko04016);; Plant-pathogen interaction (ko04626)	--	--	Protein tyrosine and serine/threonine kinase	G-type lectin S-receptor-like serine/threonine-protein kinase LECRK3 OS=Oryza sativa subsp. indica OX=39946 GN=LECRK3 PE=3 SV=2	T	Signal transduction mechanisms	unnamed protein product [Prunus armeniaca]
PaF106G0800030561.01	440	254	172	44	56	113	4.17213	2.88215	1.67645	0.451861	0.618506	1.0656	7.04482e-08	-1.59735	down	--	--	--	K02908|1.8e-13|han:110932544|K02908 large subunit ribosomal protein L30e | (RefSeq) uncharacterized protein LOC110932544	Ribosome (ko03010)	--	--	Protein of unknown function (DUF632)	Nitrate regulatory gene2 protein OS=Arabidopsis thaliana OX=3702 GN=NRG2 PE=1 SV=1	S	Function unknown	Protein of unknown function D, partial [Prunus dulcis]
PaF106G0400015192.01	269	310	206	26	51	48	3.61045	4.97392	2.85013	0.37295	0.789615	0.643816	7.91039e-17	-2.19949	down	[I]	Lipid transport and metabolism	Molecular Function: phospholipase activity (GO:0004620);; Biological Process: lipid metabolic process (GO:0006629);;	K16818|7.2e-74|atr:18428292|K16818 phospholipase A1 [EC:3.1.1.32] | (RefSeq) phospholipase A(1) DAD1, chloroplastic	Glycerophospholipid metabolism (ko00564);; alpha-Linolenic acid metabolism (ko00592)	[I]	Lipid transport and metabolism	Lipase (class 3)	Phospholipase A1-Igamma3, chloroplastic OS=Arabidopsis thaliana OX=3702 GN=At1g51440 PE=1 SV=1	I	Lipid transport and metabolism	unnamed protein product [Prunus armeniaca]
PaF106G0400016330.01	15	13	2	165	74	115	0.135909	0.136309	0.018505	1.67099	0.79863	1.07617	2.18071e-12	2.45344	up	--	--	Cellular Component: integral component of membrane (GO:0016021);;	K13466|5.4e-22|vvi:100246778|K13466 EIX receptor 1/2 | (RefSeq) receptor-like protein 12	Plant-pathogen interaction (ko04626)	--	--	Leucine rich repeat	Phytosulfokine receptor 1 OS=Arabidopsis thaliana OX=3702 GN=PSKR1 PE=1 SV=4	T	Signal transduction mechanisms	PREDICTED: receptor [Prunus dulcis]
PaF106G0400014668.01	8	2	6	65	89	77	0.075352	0.020836	0.054744	0.682503	1.00766	0.741039	2.93891e-14	2.63356	up	--	--	Cellular Component: integral component of membrane (GO:0016021);;	K13466|2.8e-12|vvi:100246778|K13466 EIX receptor 1/2 | (RefSeq) receptor-like protein 12	Plant-pathogen interaction (ko04626)	--	--	Leucine rich repeat	Tyrosine-sulfated glycopeptide receptor 1 OS=Arabidopsis thaliana OX=3702 GN=PSY1R PE=1 SV=1	T	Signal transduction mechanisms	receptor like protein 3 [Prunus dulcis]
PaF106G0800031421.01	719	539	469	10	6	11	9.88456	8.87253	6.64637	0.14901	0.085197	0.149986	8.31025e-89	-4.98001	down	--	--	Molecular Function: protein kinase activity (GO:0004672);; Molecular Function: ion channel activity (GO:0005216);; Molecular Function: ATP binding (GO:0005524);; Cellular Component: integral component of membrane (GO:0016021);;	K05391|6.9e-149|pavi:110770288|K05391 cyclic nucleotide gated channel, plant | (RefSeq) cyclic nucleotide-gated ion channel 1-like	Plant-pathogen interaction (ko04626)	[PT]	Inorganic ion transport and metabolism;; Signal transduction mechanisms	Ion transport protein	Cyclic nucleotide-gated ion channel 1 OS=Arabidopsis thaliana OX=3702 GN=CNGC1 PE=1 SV=1	--	--	unnamed protein product [Prunus armeniaca]
PaF106G0200010348.01	1677	1598	2057	702	809	802	47.3047	53.9569	59.8711	21.5478	26.6161	22.6509	6.26723e-17	-1.08091	down	[J]	Translation, ribosomal structure and biogenesis	Molecular Function: RNA binding (GO:0003723);; Molecular Function: structural constituent of ribosome (GO:0003735);; Biological Process: translation (GO:0006412);; Cellular Component: small ribosomal subunit (GO:0015935);; Cellular Component: cytosolic small ribosomal subunit (GO:0022627);;	K02969|1.9e-29|cic:CICLE_v10006225mg|K02969 small subunit ribosomal protein S20e | (RefSeq) hypothetical protein	Ribosome (ko03010)	[J]	Translation, ribosomal structure and biogenesis	Ribosomal protein S10p/S20e	40S ribosomal protein S20-1 OS=Arabidopsis thaliana OX=3702 GN=RPS20A PE=2 SV=2	J	Translation, ribosomal structure and biogenesis	PREDICTED: 40S ribosomal protein S20-2 [Theobroma cacao]
PaF106G0100005274.01	51	50	48	328	438	345	0.493558	0.574078	0.475279	3.46552	4.95134	3.33617	2.87065e-35	2.70414	up	--	--	Biological Process: telomere maintenance (GO:0000723);; Molecular Function: DNA helicase activity (GO:0003678);; Molecular Function: ATP binding (GO:0005524);; Biological Process: DNA repair (GO:0006281);; Biological Process: DNA recombination (GO:0006310);;	K07466|4.6e-189|pper:18792188|K07466 replication factor A1 | (RefSeq) replication protein A 70 kDa DNA-binding subunit B	DNA replication (ko03030);; Nucleotide excision repair (ko03420);; Mismatch repair (ko03430);; Homologous recombination (ko03440)	--	--	Replication protein A OB domain	--	D	Cell cycle control, cell division, chromosome partitioning	unnamed protein product [Prunus armeniaca]
PaF106G0100000801.01	1242	938	750	3038	2882	4384	22.3366	20.18	13.9124	59.471	60.4912	78.935	1.95581e-36	1.8171	up	[G]	Carbohydrate transport and metabolism	Molecular Function: hydrolase activity, hydrolyzing O-glycosyl compounds (GO:0004553);; Cellular Component: cell wall (GO:0005618);; Biological Process: xyloglucan metabolic process (GO:0010411);; Molecular Function: xyloglucan:xyloglucosyl transferase activity (GO:0016762);; Biological Process: cell wall biogenesis (GO:0042546);; Cellular Component: apoplast (GO:0048046);; Biological Process: ce…	K14504|4.7e-160|pmum:103323608|K14504 xyloglucan:xyloglucosyl transferase TCH4 [EC:2.4.1.207] | (RefSeq) probable xyloglucan endotransglucosylase/hydrolase protein 23	Plant hormone signal transduction (ko04075)	--	--	Glycosyl hydrolases family 16	Probable xyloglucan endotransglucosylase/hydrolase protein 23 OS=Arabidopsis thaliana OX=3702 GN=XTH23 PE=2 SV=1	G	Carbohydrate transport and metabolism	PREDICTED: probable xyloglucan endotransglucosylase/hydrolase protein 23 [Prunus mume]
PaF106G0800032458.01	478	485	529	61	49	76	2.95463	3.3233	2.98875	0.343122	0.294646	0.394482	8.9443e-50	-2.73044	down	--	--	Biological Process: signal transduction (GO:0007165);; Molecular Function: ADP binding (GO:0043531);;	K00695|2.1e-110|mtr:MTR_6g478030|K00695 sucrose synthase [EC:2.4.1.13] | (RefSeq) sucrose synthase	Starch and sucrose metabolism (ko00500)	--	--	TIR domain	Disease resistance protein Roq1 OS=Nicotiana benthamiana OX=4100 GN=ROQ1 PE=1 SV=1	S	Function unknown	PREDICTED: TMV resistance protein N-like [Prunus mume]
PaF106G0100001078.01	216	159	239	29	90	59	5.38154	4.73184	6.14032	0.766092	2.61169	1.4614	7.11392e-06	-1.36228	down	[S]	Function unknown	Cellular Component: extracellular region (GO:0005576);;	K13449|9.6e-40|bdi:100846532|K13449 pathogenesis-related protein 1 | (RefSeq) pathogenesis-related protein 1	MAPK signaling pathway - plant (ko04016);; Plant hormone signal transduction (ko04075);; Plant-pathogen interaction (ko04626)	[S]	Function unknown	Cysteine-rich secretory protein family	Pathogenesis-related protein PR-1 OS=Medicago truncatula OX=3880 GN=PR-1 PE=2 SV=1	S	Function unknown	unnamed protein product [Prunus armeniaca]
PaF106G0300013106.01	80	93	85	3	6	8	1.40552	1.95314	1.54856	0.056897	0.122221	0.13241	7.60259e-15	-2.64127	down	[K]	Transcription	Molecular Function: O-methyltransferase activity (GO:0008171);; Molecular Function: S-adenosylmethionine-dependent methyltransferase activity (GO:0008757);; Biological Process: aromatic compound biosynthetic process (GO:0019438);; Biological Process: methylation (GO:0032259);; Molecular Function: protein dimerization activity (GO:0046983);;	K16040|9.4e-127|qsu:112015373|K16040 trans-resveratrol di-O-methyltransferase [EC:2.1.1.240] | (RefSeq) trans-resveratrol di-O-methyltransferase-like	Stilbenoid, diarylheptanoid and gingerol biosynthesis (ko00945)	[R]	General function prediction only	O-methyltransferase domain	Trans-resveratrol di-O-methyltransferase OS=Vitis vinifera OX=29760 GN=ROMT PE=1 SV=2	S	Function unknown	unnamed protein product [Prunus armeniaca]
PaF106G0700027870.01	145	131	138	482	561	1001	1.73034	1.80765	1.68958	6.13969	7.6325	11.9036	1.02729e-27	2.17764	up	[G]	Carbohydrate transport and metabolism	Molecular Function: hydrolase activity, hydrolyzing O-glycosyl compounds (GO:0004553);; Biological Process: carbohydrate metabolic process (GO:0005975);;	K13031|1.2e-158|pper:18770931|K13031 amygdalin beta-glucosidase [EC:3.2.1.117] | (RefSeq) beta-glucosidase 12 isoform X1	Cyanoamino acid metabolism (ko00460)	[G]	Carbohydrate transport and metabolism	Glycosyl hydrolase family 1	Cyanogenic beta-glucosidase (Fragment) OS=Trifolium repens OX=3899 GN=LI PE=1 SV=1	G	Carbohydrate transport and metabolism	cyanogenic beta-glucosidase isoform X2 [Prunus persica]
PaF106G0100000062.01	56	59	44	110	108	135	0.778915	1.0389	0.656591	1.64801	1.81792	1.88391	6.9245e-05	1.06329	up	--	--	--	K01593|5.4e-10|mtr:MTR_7g058700|K01593 aromatic-L-amino-acid/L-tryptophan decarboxylase [EC:4.1.1.28 4.1.1.105] | (RefSeq) tyrosine/DOPA decarboxylase	Tyrosine metabolism (ko00350);; Phenylalanine metabolism (ko00360);; Tryptophan metabolism (ko00380);; Isoquinoline alkaloid biosynthesis (ko00950);; Betalain biosynthesis (ko00965)	--	--	Protein of unknown function (DUF674)	--	--	--	PREDICTED: uncharacterized protein LOC103321024 [Prunus mume]
PaF106G0100006531.01	48	37	51	127	196	154	0.946373	0.88303	1.04499	2.73203	4.58684	3.08543	9.32871e-10	1.63874	up	[G]	Carbohydrate transport and metabolism	Molecular Function: pectate lyase activity (GO:0030570);; Biological Process: pectin catabolic process (GO:0045490);; Molecular Function: metal ion binding (GO:0046872);;	K01728|3.5e-227|pavi:110764871|K01728 pectate lyase [EC:4.2.2.2] | (RefSeq) probable pectate lyase 4	Pentose and glucuronate interconversions (ko00040)	--	--	Pectate lyase	Putative pectate lyase 2 OS=Arabidopsis thaliana OX=3702 GN=At1g11920 PE=3 SV=2	G	Carbohydrate transport and metabolism	unnamed protein product [Prunus armeniaca]
PaF106G0200009839.01	104	124	90	331	315	337	1.44191	2.05106	1.29203	5.01274	5.11059	4.69189	4.60527e-15	1.57648	up	--	--	Cellular Component: integral component of membrane (GO:0016021);; Molecular Function: transferase activity, transferring acyl groups (GO:0016746);;	K13508|2.6e-278|pmum:103332675|K13508 glycerol-3-phosphate acyltransferase [EC:2.3.1.15 2.3.1.198] | (RefSeq) glycerol-3-phosphate acyltransferase 5-like	Glycerolipid metabolism (ko00561);; Glycerophospholipid metabolism (ko00564)	--	--	haloacid dehalogenase-like hydrolase	Glycerol-3-phosphate acyltransferase 5 OS=Arabidopsis thaliana OX=3702 GN=GPAT5 PE=1 SV=1	I	Lipid transport and metabolism	unnamed protein product [Prunus armeniaca]
PaF106G0500019108.01	76	83	67	0	2	0	0.378023	0.498157	0.343981	0	0.01147	0	9.67554e-19	-3.19563	down	[S]	Function unknown	Molecular Function: ATP binding (GO:0005524);;	K10875|3.5e-229|pmum:103329023|K10875 DNA repair and recombination protein RAD54 and RAD54-like protein [EC:3.6.4.-] | (RefSeq) SNF2 domain-containing protein CLASSY 4-like	Homologous recombination (ko03440)	[L]	Replication, recombination and repair	SNF2 family N-terminal domain	SNF2 domain-containing protein CLASSY 3 OS=Arabidopsis thaliana OX=3702 GN=CLSY3 PE=1 SV=1	L	Replication, recombination and repair	unnamed protein product [Prunus armeniaca]
PaF106G0800032614.01	819	749	783	1636	1461	2014	7.23802	7.92313	7.12803	15.7683	15.0917	17.8453	5.66097e-32	1.17651	up	[T]	Signal transduction mechanisms	Molecular Function: ATP binding (GO:0005524);; Cellular Component: integral component of membrane (GO:0016021);; Molecular Function: ATPase activity (GO:0016887);;	K05681|9.2e-81|nau:109228191|K05681 ATP-binding cassette, subfamily G (WHITE), member 2 | (RefSeq) ABC transporter G family member 9-like	ABC transporters (ko02010)	[Q]	Secondary metabolites biosynthesis, transport and catabolism	ABC transporter	ABC transporter G family member 22 OS=Arabidopsis thaliana OX=3702 GN=ABCG22 PE=1 SV=1	Q	Secondary metabolites biosynthesis, transport and catabolism	unnamed protein product [Prunus armeniaca]
PaF106G0100006288.01	154	160	156	51	35	63	5.78181	7.18024	6.03644	2.08432	1.52489	2.36054	5.82955e-08	-1.38729	down	[J]	Translation, ribosomal structure and biogenesis	Biological Process: ribosomal small subunit assembly (GO:0000028);; Molecular Function: structural constituent of ribosome (GO:0003735);; Biological Process: translation (GO:0006412);; Cellular Component: cytosolic small ribosomal subunit (GO:0022627);; Biological Process: maturation of SSU-rRNA (GO:0030490);;	K02979|2.8e-28|pper:109946546|K02979 small subunit ribosomal protein S28e | (RefSeq) 40S ribosomal protein S28-like	Ribosome (ko03010)	[J]	Translation, ribosomal structure and biogenesis	Ribosomal protein S28e	40S ribosomal protein S28 OS=Zea mays OX=4577 GN=RPS28 PE=3 SV=1	J	Translation, ribosomal structure and biogenesis	40S ribosomal protein S28-like [Prunus persica]
PaF106G0800032611.01	81	77	58	115	127	248	0.783425	0.886571	0.575349	1.20396	1.43227	2.40037	0.000199525	1.04945	up	--	--	Biological Process: telomere maintenance (GO:0000723);; Molecular Function: DNA helicase activity (GO:0003678);; Molecular Function: ATP binding (GO:0005524);; Biological Process: DNA repair (GO:0006281);; Biological Process: DNA recombination (GO:0006310);;	K07466|2.7e-189|pper:18792188|K07466 replication factor A1 | (RefSeq) replication protein A 70 kDa DNA-binding subunit B	DNA replication (ko03030);; Nucleotide excision repair (ko03420);; Mismatch repair (ko03430);; Homologous recombination (ko03440)	--	--	Replication protein A OB domain	--	D	Cell cycle control, cell division, chromosome partitioning	unnamed protein product [Prunus armeniaca]
PaF106G0600024201.01	1605	1332	1078	235	322	407	18.7942	18.683	13.1062	2.98153	4.3904	4.77905	3.34464e-29	-1.87392	down	--	--	Molecular Function: hydrolase activity, hydrolyzing O-glycosyl compounds (GO:0004553);; Biological Process: carbohydrate metabolic process (GO:0005975);; Cellular Component: anchored component of plasma membrane (GO:0046658);;	K19891|5.4e-25|smo:SELMODRAFT_87871|K19891 glucan endo-1,3-beta-glucosidase 1/2/3 [EC:3.2.1.39] | (RefSeq) hypothetical protein	Starch and sucrose metabolism (ko00500)	--	--	X8 domain	Glucan endo-1,3-beta-glucosidase 12 OS=Arabidopsis thaliana OX=3702 GN=At4g29360 PE=2 SV=1	G	Carbohydrate transport and metabolism	unnamed protein product [Prunus armeniaca]
PaF106G0300011239.01	219	234	212	95	67	91	3.46379	4.29889	3.4592	1.6378	1.28585	1.39603	8.47764e-08	-1.19523	down	--	--	Molecular Function: hydrolase activity, acting on ester bonds (GO:0016788);;	K01206|2.2e-32|thj:104825554|K01206 alpha-L-fucosidase [EC:3.2.1.51] | (RefSeq) alpha-L-fucosidase 3	Other glycan degradation (ko00511)	--	--	GDSL-like Lipase/Acylhydrolase	GDSL esterase/lipase At3g27950 OS=Arabidopsis thaliana OX=3702 GN=At3g27950 PE=2 SV=1	S	Function unknown	hypothetical protein PRUPE_3G285100 [Prunus persica]
PaF106G0300012396.01	196	171	148	901	660	806	2.65367	2.7652	2.05986	13.2655	10.4238	10.9158	9.14072e-42	2.17508	up	[QV]	Secondary metabolites biosynthesis, transport and catabolism;; Defense mechanisms	Molecular Function: iron ion binding (GO:0005506);; Cellular Component: membrane (GO:0016020);; Molecular Function: oxidoreductase activity, acting on paired donors, with incorporation or reduction of molecular oxygen, NAD(P)H as one donor, and incorporation of one atom of oxygen (GO:0016709);; Molecular Function: heme binding (GO:0020037);;	K00495|1.8e-239|pmum:103337951|K00495 phenylacetaldehyde oxime monooxygenase [EC:1.14.14.44] | (RefSeq) cytochrome P450 71A1-like	Cyanoamino acid metabolism (ko00460)	[Q]	Secondary metabolites biosynthesis, transport and catabolism	Cytochrome P450	Phenylacetaldehyde oxime monooxygenase CYP71AN24 OS=Prunus mume OX=102107 GN=CYP71AN24 PE=1 SV=1	Q	Secondary metabolites biosynthesis, transport and catabolism	PREDICTED: cytochrome P450 71A1-like [Prunus mume]
PaF106G0300012172.01	220	248	212	62	59	61	1.69291	2.27738	1.68022	0.51474	0.530173	0.463098	5.93905e-13	-1.63752	down	--	--	Cellular Component: integral component of membrane (GO:0016021);;	K13466|3.5e-23|zju:107423984|K13466 EIX receptor 1/2 | (RefSeq) receptor-like protein EIX2	Plant-pathogen interaction (ko04626)	[R]	General function prediction only	Leucine rich repeat	Receptor-like protein 6 OS=Arabidopsis thaliana OX=3702 GN=RLP6 PE=3 SV=1	B	Chromatin structure and dynamics	receptor like protein 30-like [Prunus avium]
PaF106G0600025168.01	195	149	156	63	78	74	2.43356	2.2121	2.00465	0.854096	1.12314	0.924105	2.27154e-05	-1.00584	down	[E]	Amino acid transport and metabolism	Molecular Function: transaminase activity (GO:0008483);; Cellular Component: integral component of membrane (GO:0016021);;	K22207|1.2e-272|pavi:110770561|K22207 L-cysteine desulfhydrase [EC:4.4.1.28] | (RefSeq) probable L-cysteine desulfhydrase, chloroplastic	Cysteine and methionine metabolism (ko00270)	[E]	Amino acid transport and metabolism	Aminotransferase class-V	Probable L-cysteine desulfhydrase, chloroplastic OS=Arabidopsis thaliana OX=3702 GN=CpNIFS3 PE=1 SV=1	E	Amino acid transport and metabolism	unnamed protein product [Prunus armeniaca]
PaF106G0300011916.01	977	794	951	334	328	288	16.8689	16.4009	16.9368	6.27046	6.59418	4.96461	1.51405e-21	-1.36315	down	--	--	Molecular Function: nucleic acid binding (GO:0003676);; Biological Process: DNA integration (GO:0015074);;	K15803|1.7e-23|pmum:103326375|K15803 (-)-germacrene D synthase [EC:4.2.3.75] | (RefSeq) (-)-alpha-pinene synthase-like	Sesquiterpenoid and triterpenoid biosynthesis (ko00909)	--	--	gag-polypeptide of LTR copia-type	--	L	Replication, recombination and repair	uncharacterized protein LOC110773211 [Prunus avium]
PaF106G0200008359.01	424	350	433	747	781	834	7.5001	7.55925	7.92251	14.5024	16.2385	14.882	7.99335e-17	1.03147	up	--	--	Molecular Function: peptidyl-prolyl cis-trans isomerase activity (GO:0003755);; Cellular Component: integral component of membrane (GO:0016021);;	K10848|1.4e-99|cic:CICLE_v10024418mg|K10848 DNA excision repair protein ERCC-4 [EC:3.1.-.-] | (RefSeq) hypothetical protein	Nucleotide excision repair (ko03420)	--	--	Cyclophilin type peptidyl-prolyl cis-trans isomerase/CLD	--	S	Function unknown	PREDICTED: uncharacterized protein LOC103331535 [Prunus mume]
PaF106G0100001047.01	20	2	8	60	54	79	0.779402	0.096407	0.317318	2.63157	2.52219	3.19919	2.12262e-06	1.76347	up	--	--	Molecular Function: iron ion binding (GO:0005506);; Biological Process: lipid biosynthetic process (GO:0008610);; Cellular Component: integral component of membrane (GO:0016021);; Molecular Function: oxidoreductase activity (GO:0016491);;	K15746|3.3e-61|pper:18787302|K15746 beta-carotene 3-hydroxylase [EC:1.14.15.24] | (RefSeq) beta-carotene hydroxylase 2, chloroplastic	Carotenoid biosynthesis (ko00906)	--	--	--	Beta-carotene hydroxylase 2, chloroplastic OS=Capsicum annuum OX=4072 GN=CA2 PE=1 SV=2	S	Function unknown	unnamed protein product [Prunus armeniaca]
PaF106G0200007369.01	562	420	472	183	183	202	2.62219	2.22248	1.87537	0.768153	0.822196	0.779936	1.46558e-15	-1.20879	down	--	--	Molecular Function: ADP binding (GO:0043531);;	K12818|4.5e-59|mtr:MTR_0267s0070|K12818 ATP-dependent RNA helicase DHX8/PRP22 [EC:3.6.4.13] | (RefSeq) NB-ARC domain disease resistance protein, putative	Spliceosome (ko03040)	[T]	Signal transduction mechanisms	Leucine Rich repeats (2 copies)	Putative disease resistance protein At3g14460 OS=Arabidopsis thaliana OX=3702 GN=At3g14460 PE=3 SV=1	T	Signal transduction mechanisms	hypothetical protein PRUPE_2G046700 [Prunus persica]
PaF106G0300011070.01	25	39	33	384	342	371	0.280528	0.538224	0.38657	4.85919	4.6425	4.32007	2.15014e-48	3.2137	up	--	--	Cellular Component: integral component of membrane (GO:0016021);;	K19476|1.4e-20|cic:CICLE_v10026997mg|K19476 vacuolar protein sorting-associated protein IST1 | (RefSeq) hypothetical protein	Endocytosis (ko04144)	[E]	Amino acid transport and metabolism	Transmembrane amino acid transporter protein	Lysine histidine transporter 1 OS=Arabidopsis thaliana OX=3702 GN=LHT1 PE=1 SV=1	E	Amino acid transport and metabolism	lysine histidine transporter 1 isoform X1 [Prunus yedoensis var. nudiflora]
PaF106G0200008218.01	14	10	13	59	38	56	0.587398	0.532431	0.569798	2.85768	1.96052	2.51757	2.45254e-05	1.49925	up	--	--	Biological Process: ubiquitin-dependent protein catabolic process (GO:0006511);;	K03094|2.6e-56|pavi:110752715|K03094 S-phase kinase-associated protein 1 | (RefSeq) SKP1-like protein 11	Ubiquitin mediated proteolysis (ko04120);; Protein processing in endoplasmic reticulum (ko04141)	[O]	Posttranslational modification, protein turnover, chaperones	Skp1 family, tetramerisation domain	SKP1-like protein 1A OS=Arabidopsis thaliana OX=3702 GN=SKP1A PE=1 SV=1	O	Posttranslational modification, protein turnover, chaperones	SKP1-like protein 1B [Prunus yedoensis var. nudiflora]
PaF106G0100006004.01	51	37	45	111	107	161	1.1225	0.988198	1.02156	2.70641	2.79118	3.61241	1.63887e-07	1.37688	up	--	--	--	K00020|5.3e-16|mtr:MTR_8g088900|K00020 3-hydroxyisobutyrate dehydrogenase [EC:1.1.1.31] | (RefSeq) 6-phosphogluconate dehydrogenase-like protein	Valine, leucine and isoleucine degradation (ko00280)	--	--	Phosphate-induced protein 1 conserved region	Protein EXORDIUM-like 2 OS=Arabidopsis thaliana OX=3702 GN=EXL2 PE=2 SV=1	L	Replication, recombination and repair	unnamed protein product [Prunus armeniaca]
PaF106G0800031408.01	119	94	122	255	383	368	2.44283	2.30522	2.57288	5.69787	9.18549	7.56611	7.81974e-14	1.54409	up	--	--	--	K12472|1.4e-19|bvg:104885038|K12472 epidermal growth factor receptor substrate 15 | (RefSeq) filaggrin-like	Endocytosis (ko04144)	--	--	BURP domain	BURP domain protein USPL1 OS=Arabidopsis thaliana OX=3702 GN=USPL1 PE=2 SV=1	S	Function unknown	unnamed protein product [Prunus armeniaca]
PaF106G0200007295.01	420	450	345	110	70	133	2.31896	2.97035	1.96081	0.657583	0.448832	0.731347	4.44462e-16	-1.72782	down	[R]	General function prediction only	Molecular Function: ADP binding (GO:0043531);;	K12818|4.8e-193|mtr:MTR_0267s0070|K12818 ATP-dependent RNA helicase DHX8/PRP22 [EC:3.6.4.13] | (RefSeq) NB-ARC domain disease resistance protein, putative	Spliceosome (ko03040)	[T]	Signal transduction mechanisms	NB-ARC domain	Putative disease resistance RPP13-like protein 1 OS=Arabidopsis thaliana OX=3702 GN=RPPL1 PE=3 SV=1	T	Signal transduction mechanisms	putative disease resistance RPP13-like protein 1 [Prunus persica]
PaF106G0100001087.01	77	35	76	241	196	229	0.883332	0.475957	0.898307	3.02561	2.63444	2.64359	7.01398e-12	1.69848	up	[IR]	Lipid transport and metabolism;; General function prediction only	Molecular Function: oxidoreductase activity, acting on CH-OH group of donors (GO:0016614);; Molecular Function: lyase activity (GO:0016829);; Molecular Function: flavin adenine dinucleotide binding (GO:0050660);;	K08248|0.0e+00|pmum:103323461|K08248 (R)-mandelonitrile lyase [EC:4.1.2.10] | (RefSeq) (R)-mandelonitrile lyase 2-like	Cyanoamino acid metabolism (ko00460)	[R]	General function prediction only	GMC oxidoreductase	(R)-mandelonitrile lyase 2 OS=Prunus serotina OX=23207 GN=MDL2 PE=2 SV=1	E	Amino acid transport and metabolism	PREDICTED: (R)-mandelonitrile lyase 2-like [Prunus mume]
PaF106G0100005869.01	16	24	24	44	69	68	0.67253	1.25203	1.09398	2.11029	3.55089	2.99671	0.000862426	1.16249	up	--	--	--	K10206|8.6e-14|pmum:103333087|K10206 LL-diaminopimelate aminotransferase [EC:2.6.1.83] | (RefSeq) probable LL-diaminopimelate aminotransferase, chloroplastic	Lysine biosynthesis (ko00300);; Biosynthesis of amino acids (ko01230)	--	--	--	--	--	--	unnamed protein product [Prunus armeniaca]
PaF106G0800032319.01	91	89	78	534	506	605	0.49561	0.583699	0.442294	3.19119	3.2436	3.32777	1.44889e-58	2.61374	up	[R]	General function prediction only	Biological Process: signal transduction (GO:0007165);; Molecular Function: ADP binding (GO:0043531);;	K00695|5.7e-130|mtr:MTR_6g478030|K00695 sucrose synthase [EC:2.4.1.13] | (RefSeq) sucrose synthase	Starch and sucrose metabolism (ko00500)	--	--	TIR domain	TMV resistance protein N OS=Nicotiana glutinosa OX=35889 GN=N PE=1 SV=1	S	Function unknown	PREDICTED: TMV resistance protein N-like [Prunus mume]
PaF106G0200008745.01	2567	1597	1884	178	222	253	31.3637	23.3459	23.7343	2.35479	3.16142	3.08505	1.23331e-98	-2.99056	down	[QV]	Secondary metabolites biosynthesis, transport and catabolism;; Defense mechanisms	Molecular Function: iron ion binding (GO:0005506);; Cellular Component: integral component of membrane (GO:0016021);; Molecular Function: oxidoreductase activity, acting on paired donors, with incorporation or reduction of molecular oxygen (GO:0016705);; Molecular Function: heme binding (GO:0020037);;	K20495|2.5e-116|ppp:112291140|K20495 long-chain fatty acid omega-monooxygenase [EC:1.14.14.80] | (RefSeq) cytochrome P450 704B1-like	Fatty acid degradation (ko00071);; Cutin, suberine and wax biosynthesis (ko00073)	[QI]	Secondary metabolites biosynthesis, transport and catabolism;; Lipid transport and metabolism	Cytochrome P450	Cytochrome P450 704C1 OS=Pinus taeda OX=3352 GN=CYP704C1 PE=2 SV=1	--	--	PREDICTED: cytochrome P450 704C1-like [Prunus mume]
PaF106G0400017490.01	28	44	26	97	136	133	0.172143	0.329505	0.168637	0.692348	1.03263	0.849515	8.98218e-08	1.60144	up	--		Molecular Function: protein serine/threonine kinase activity (GO:0004674);; Molecular Function: ATP binding (GO:0005524);; Cellular Component: plasma membrane (GO:0005886);; Cellular Component: integral component of membrane (GO:0016021);; Biological Process: protein autophosphorylation (GO:0046777);;	K13416|8.2e-67|bna:106376693|K13416 brassinosteroid insensitive 1-associated receptor kinase 1 [EC:2.7.10.1 2.7.11.1] | (RefSeq) BRASSINOSTEROID INSENSITIVE 1-associated receptor kinase 1-like isoform X1	MAPK signaling pathway - plant (ko04016);; Plant hormone signal transduction (ko04075);; Plant-pathogen interaction (ko04626)	--	--	Protein kinase domain	Probable LRR receptor-like serine/threonine-protein kinase At1g07650 OS=Arabidopsis thaliana OX=3702 GN=At1g07650 PE=1 SV=1	T	Signal transduction mechanisms	PREDICTED: probable leucine-rich repeat receptor-like serine/threonine-protein kinase At3g14840 [Prunus mume]
PaF106G0800031024.01	61	55	67	163	132	213	0.874165	0.945473	0.988579	2.54828	2.20572	3.05951	7.7817e-09	1.37866	up	[G]	Carbohydrate transport and metabolism	Molecular Function: UDP-glycosyltransferase activity (GO:0008194);;	K14595|1.0e-271|pper:18766834|K14595 abscisate beta-glucosyltransferase [EC:2.4.1.263] | (RefSeq) abscisate beta-glucosyltransferase	Carotenoid biosynthesis (ko00906)	[GC]	Carbohydrate transport and metabolism;; Energy production and conversion	UDP-glucoronosyl and UDP-glucosyl transferase	Abscisate beta-glucosyltransferase OS=Phaseolus angularis OX=3914 GN=AOG PE=1 SV=1	--	--	unnamed protein product [Prunus armeniaca]
PaF106G0800032374.01	144	128	157	278	322	320	0.728291	0.774968	0.820642	1.53176	1.90287	1.62137	1.23983e-09	1.11911	up	--	--	Biological Process: signal transduction (GO:0007165);; Molecular Function: ADP binding (GO:0043531);;	K00695|9.5e-128|mtr:MTR_6g478030|K00695 sucrose synthase [EC:2.4.1.13] | (RefSeq) sucrose synthase	Starch and sucrose metabolism (ko00500)	--	--	TIR domain	TMV resistance protein N OS=Nicotiana glutinosa OX=35889 GN=N PE=1 SV=1	S	Function unknown	PREDICTED: TMV resistance protein N-like [Prunus mume]
PaF106G0800032587.01	32	33	19	87	69	108	0.476691	0.582111	0.284815	1.40339	1.19132	1.61113	1.2375e-05	1.37	up	--	--	Molecular Function: anaphase-promoting complex binding (GO:0010997);; Biological Process: cell division (GO:0051301);; Molecular Function: ubiquitin-protein transferase activator activity (GO:0097027);; Biological Process: positive regulation of ubiquitin protein ligase activity (GO:1904668);;	K03363|5.0e-109|mdm:103436456|K03363 cell division cycle 20, cofactor of APC complex | (RefSeq) cell division cycle 20.1, cofactor of APC complex-like	Ubiquitin mediated proteolysis (ko04120)	[DO]	Cell cycle control, cell division, chromosome partitioning;; Posttranslational modification, protein turnover, chaperones	WD domain, G-beta repeat	Cell division cycle 20.1, cofactor of APC complex OS=Arabidopsis thaliana OX=3702 GN=CDC20-1 PE=1 SV=1	--	--	unnamed protein product [Prunus armeniaca]
PaF106G0100000121.01	13	8	8	68	79	51	0.098219	0.073692	0.065608	0.598942	0.747314	0.410061	1.17384e-08	1.99576	up	--	--	Molecular Function: translation initiation factor activity (GO:0003743);;	K03125|2.9e-284|pavi:110754021|K03125 transcription initiation factor TFIID subunit 1 [EC:2.3.1.48 2.7.11.1] | (RefSeq) transcription initiation factor TFIID subunit 1-like	Basal transcription factors (ko03022)	[K]	Transcription	--	Transcription initiation factor TFIID subunit 1 OS=Arabidopsis thaliana OX=3702 GN=TAF1 PE=1 SV=1	K	Transcription	unnamed protein product [Prunus armeniaca]
PaF106G0100006489.01	388	306	373	1093	1011	1349	2.87558	1.79957	2.94073	10.049	9.78234	11.2001	4.97493e-54	1.73657	up	[R]	General function prediction only	Biological Process: signal transduction (GO:0007165);; Molecular Function: ADP binding (GO:0043531);;	K00695|1.1e-135|mtr:MTR_6g478030|K00695 sucrose synthase [EC:2.4.1.13] | (RefSeq) sucrose synthase	Starch and sucrose metabolism (ko00500)	--	--	TIR domain	TMV resistance protein N OS=Nicotiana glutinosa OX=35889 GN=N PE=1 SV=1	T	Signal transduction mechanisms	TMV resistance protein N isoform X1 [Prunus persica]
PaF106G0200010198.01	643	626	655	315	223	317	13.9507	16.2808	14.6762	7.41374	5.63169	6.903	8.4428e-12	-1.04501	down	[P]	Inorganic ion transport and metabolism	Molecular Function: superoxide dismutase activity (GO:0004784);; Cellular Component: chloroplast nucleoid (GO:0042644);; Molecular Function: metal ion binding (GO:0046872);;	K04564|4.4e-175|pmum:103333005|K04564 superoxide dismutase, Fe-Mn family [EC:1.15.1.1] | (RefSeq) superoxide dismutase [Fe], chloroplastic isoform X1	Peroxisome (ko04146)	[P]	Inorganic ion transport and metabolism	Iron/manganese superoxide dismutases, C-terminal domain	Superoxide dismutase [Fe] 2, chloroplastic OS=Arabidopsis thaliana OX=3702 GN=FSD2 PE=1 SV=1	P	Inorganic ion transport and metabolism	PREDICTED: superoxide dismutase [Fe], chloroplastic isoform X1 [Prunus mume]
PaF106G0500020036.01	561	417	534	1363	1112	1246	6.93103	6.16411	6.80509	18.3512	16.055	15.4307	3.08009e-27	1.35613	up	[E]	Amino acid transport and metabolism	Cellular Component: cytoplasm (GO:0005737);; Molecular Function: carbon-sulfur lyase activity (GO:0016846);; Biological Process: transsulfuration (GO:0019346);; Molecular Function: pyridoxal phosphate binding (GO:0030170);;	K01761|4.5e-245|pmum:103337840|K01761 methionine-gamma-lyase [EC:4.4.1.11] | (RefSeq) methionine gamma-lyase	Cysteine and methionine metabolism (ko00270);; Selenocompound metabolism (ko00450)	[E]	Amino acid transport and metabolism	Cys/Met metabolism PLP-dependent enzyme	Methionine gamma-lyase OS=Arabidopsis thaliana OX=3702 GN=MGL PE=1 SV=1	E	Amino acid transport and metabolism	unnamed protein product [Prunus armeniaca]
PaF106G0700027002.01	131	107	86	53	32	43	3.05536	2.99928	2.07406	1.33887	0.872597	1.00882	0.000482532	-1.03819	down	--	--	--	K10578|5.5e-06|pavi:110754721|K10578 ubiquitin-conjugating enzyme E2 J1 [EC:2.3.2.23] | (RefSeq) ubiquitin-conjugating enzyme E2 32-like	Ubiquitin mediated proteolysis (ko04120);; Protein processing in endoplasmic reticulum (ko04141)	--	--	--	--	O	Posttranslational modification, protein turnover, chaperones	PREDICTED: uncharacterized protein LOC107881725 [Prunus mume]
PaF106G0500018747.01	747	648	714	160	213	236	12.8016	13.2785	12.6211	2.98418	4.26171	4.03844	1.0006e-27	-1.63443	down	[R]	General function prediction only	--	K21568|1.3e-168|pmum:103336796|K21568 pinoresinol/lariciresinol reductase [EC:1.23.1.1 1.23.1.2 1.23.1.3 1.23.1.4] | (RefSeq) isoflavone reductase homolog	Biosynthesis of various secondary metabolites - part 2 (ko00998)	--	--	NmrA-like family	Isoflavone reductase homolog OS=Lupinus albus OX=3870 PE=2 SV=1	S	Function unknown	PREDICTED: isoflavone reductase homolog [Prunus mume]
PaF106G0600025165.01	135	134	150	53	45	48	1.69358	2.05718	2.04003	0.723172	0.6945	0.619265	9.78465e-07	-1.25391	down	[E]	Amino acid transport and metabolism	Molecular Function: catalytic activity (GO:0003824);;	K22207|1.0e-268|pmum:103344505|K22207 L-cysteine desulfhydrase [EC:4.4.1.28] | (RefSeq) probable L-cysteine desulfhydrase, chloroplastic isoform X1	Cysteine and methionine metabolism (ko00270)	[E]	Amino acid transport and metabolism	Aminotransferase class-V	Probable L-cysteine desulfhydrase, chloroplastic OS=Arabidopsis thaliana OX=3702 GN=CpNIFS3 PE=1 SV=1	E	Amino acid transport and metabolism	unnamed protein product [Prunus armeniaca]
PaF106G0300014540.01	7803	5117	7473	2156	1890	2415	75.9392	59.7633	75.826	23.5701	21.6993	23.1777	5.36709e-47	-1.52917	down	[I]	Lipid transport and metabolism	Molecular Function: catalytic activity (GO:0003824);;	K01897|1.6e-285|pmum:103327297|K01897 long-chain acyl-CoA synthetase [EC:6.2.1.3] | (RefSeq) long chain acyl-CoA synthetase 1	Fatty acid biosynthesis (ko00061);; Fatty acid degradation (ko00071);; Fatty acid metabolism (ko01212);; Peroxisome (ko04146)	[I]	Lipid transport and metabolism	AMP-binding enzyme	Long chain acyl-CoA synthetase 1 OS=Arabidopsis thaliana OX=3702 GN=LACS1 PE=2 SV=1	I	Lipid transport and metabolism	long-chain acyl-CoA synthetase 1 [Prunus sibirica]
Prunus_sibirica_newGene_155	97	112	99	299	249	321	1.43866	1.97794	1.51756	4.83387	4.31204	4.77414	1.30899e-13	1.45743	up	--	--	Molecular Function: UDP-glycosyltransferase activity (GO:0008194);;	K22706|3.8e-18|pmum:103319663|K22706 (R)-mandelonitrile beta-glucosyltransferase [EC:2.4.1.354] | (RefSeq) 7-deoxyloganetin glucosyltransferase-like	Cyanoamino acid metabolism (ko00460)	[GC]	Carbohydrate transport and metabolism;; Energy production and conversion	--	7-deoxyloganetin glucosyltransferase OS=Catharanthus roseus OX=4058 GN=UGT85A23 PE=1 SV=1	--	--	7-deoxyloganetin glucosyltransferase-like [Prunus yedoensis var. nudiflora]
Prunus_sibirica_newGene_1925	3	0	10	180	151	180	0.013357	0	0.052018	0.984861	0.885613	0.908831	1.64698e-34	3.85099	up	--	--	Molecular Function: nucleic acid binding (GO:0003676);; Molecular Function: RNA-DNA hybrid ribonuclease activity (GO:0004523);; Molecular Function: zinc ion binding (GO:0008270);;	K14677|2.3e-20|ghi:107892630|K14677 aminoacylase [EC:3.5.1.14] | (RefSeq) uncharacterized protein LOC107892630	Arginine biosynthesis (ko00220);; 2-Oxocarboxylic acid metabolism (ko01210);; Biosynthesis of amino acids (ko01230)	[R]	General function prediction only	--	--	L	Replication, recombination and repair	unnamed protein product [Prunus armeniaca]
PaF106G0100003994.01	111	162	112	344	281	266	1.76238	3.07769	1.83517	5.97234	5.22395	4.24492	1.37439e-06	1.15301	up	[T]	Signal transduction mechanisms	Molecular Function: acid phosphatase activity (GO:0003993);; Molecular Function: ferrous iron binding (GO:0008198);; Molecular Function: ferric iron binding (GO:0008199);;	K14379|8.0e-199|pmum:103320985|K14379 tartrate-resistant acid phosphatase type 5 [EC:3.1.3.2] | (RefSeq) purple acid phosphatase 17-like	Riboflavin metabolism (ko00740)	[O]	Posttranslational modification, protein turnover, chaperones	Calcineurin-like phosphoesterase	Purple acid phosphatase 17 OS=Arabidopsis thaliana OX=3702 GN=PAP17 PE=2 SV=1	O	Posttranslational modification, protein turnover, chaperones	unnamed protein product [Prunus armeniaca]
PaF106G0300012720.01	14	10	7	307	132	242	0.30038	0.253691	0.153378	7.52433	3.45188	5.4487	6.42792e-31	3.49184	up	--	--	Molecular Function: protein dimerization activity (GO:0046983);;	K12126|8.5e-08|jre:109000498|K12126 phytochrome-interacting factor 3 | (RefSeq) transcription factor PIF3-like	Plant hormone signal transduction (ko04075);; Circadian rhythm - plant (ko04712)	--	--	Helix-loop-helix DNA-binding domain	Transcription factor RHD6 OS=Arabidopsis thaliana OX=3702 GN=RHD6 PE=1 SV=1	K	Transcription	unnamed protein product [Prunus armeniaca]
PaF106G0100001469.01	0	0	0	253	242	259	0	0	0	11.0465	11.7291	10.4803	2.35384e-62	5.27221	up	--	--	Molecular Function: nucleic acid binding (GO:0003676);; Biological Process: DNA integration (GO:0015074);;	K00284|1.1e-14|oeu:111379166|K00284 glutamate synthase (ferredoxin) [EC:1.4.7.1] | (RefSeq) ferredoxin-dependent glutamate synthase, chloroplastic-like	Glyoxylate and dicarboxylate metabolism (ko00630);; Nitrogen metabolism (ko00910)	[R]	General function prediction only	--	Retrovirus-related Pol polyprotein from transposon RE1 OS=Arabidopsis thaliana OX=3702 GN=RE1 PE=2 SV=1	L	Replication, recombination and repair	uncharacterized protein LOC110746340 [Prunus avium]
PaF106G0800030619.01	272	162	165	694	596	647	2.25727	1.62626	1.4155	6.52374	6.06944	5.58002	4.72496e-22	1.69344	up	--	--	Molecular Function: protein kinase activity (GO:0004672);; Molecular Function: ATP binding (GO:0005524);;	K13430|6.6e-28|nta:107764193|K13430 serine/threonine-protein kinase PBS1 [EC:2.7.11.1] | (RefSeq) serine/threonine-protein kinase PBS1-like	Plant-pathogen interaction (ko04626)	--	--	Protein tyrosine and serine/threonine kinase	Proline-rich receptor-like protein kinase PERK12 OS=Arabidopsis thaliana OX=3702 GN=PERK12 PE=2 SV=2	T	Signal transduction mechanisms	unnamed protein product [Prunus armeniaca]
PaF106G0600025876.01	6	5	8	66	74	83	0.301509	0.285106	0.453671	3.95038	4.77629	4.61533	5.97013e-14	2.53676	up	--	--	Biological Process: carbohydrate metabolic process (GO:0005975);; Molecular Function: glycogen phosphorylase activity (GO:0008184);; Molecular Function: pyridoxal phosphate binding (GO:0030170);; Molecular Function: SHG alpha-glucan phosphorylase activity (GO:0102499);;	K00688|2.0e-22|pmum:103324815|K00688 glycogen phosphorylase [EC:2.4.1.1] | (RefSeq) glycogen phosphorylase 1-like isoform X1	Starch and sucrose metabolism (ko00500)	--	--	Carbohydrate phosphorylase	--	G	Carbohydrate transport and metabolism	unnamed protein product [Prunus armeniaca]
PaF106G0600022803.01	337	219	309	96	115	93	4.42914	3.44628	4.18754	1.37449	1.76664	1.21347	2.55221e-09	-1.27833	down	--	--	Cellular Component: integral component of membrane (GO:0016021);;	K13946|1.8e-12|ppp:112289353|K13946 auxin influx carrier (AUX1 LAX family) | (RefSeq) auxin transporter protein 1-like	Plant hormone signal transduction (ko04075)	[E]	Amino acid transport and metabolism	Transmembrane amino acid transporter protein	GABA transporter 1 OS=Arabidopsis thaliana OX=3702 GN=GAT1 PE=1 SV=1	E	Amino acid transport and metabolism	unnamed protein product [Prunus armeniaca]
PaF106G0400017564.01	46	32	44	119	165	155	0.93516	0.77553	0.93551	2.99071	3.97477	3.20523	1.75842e-10	1.6765	up	[R]	General function prediction only	Biological Process: mitochondrial respiratory chain complex I assembly (GO:0032981);;	K03070|1.9e-48|pmum:103319773|K03070 preprotein translocase subunit SecA [EC:7.4.2.8] | (RefSeq) protein translocase subunit SECA2, chloroplastic	Protein export (ko03060)	[G]	Carbohydrate transport and metabolism	Complex I intermediate-associated protein 30 (CIA30)	Protein translocase subunit SECA2, chloroplastic OS=Arabidopsis thaliana OX=3702 GN=SECA2 PE=1 SV=1	G	Carbohydrate transport and metabolism	unnamed protein product [Prunus armeniaca]
PaF106G0800031398.01	653	586	710	243	261	330	13.4809	14.6431	15.16	4.88073	5.56742	6.36728	5.45203e-15	-1.10179	down	[J]	Translation, ribosomal structure and biogenesis	Molecular Function: structural constituent of ribosome (GO:0003735);; Biological Process: translation (GO:0006412);; Cellular Component: large ribosomal subunit (GO:0015934);;	K02876|5.3e-54|pmum:103335627|K02876 large subunit ribosomal protein L15 | (RefSeq) 50S ribosomal protein L15-like	Ribosome (ko03010)	[J]	Translation, ribosomal structure and biogenesis	--	--	J	Translation, ribosomal structure and biogenesis	unnamed protein product [Prunus armeniaca]
PaF106G0200007549.01	72	74	111	10	14	20	0.544897	0.6724	0.874777	0.076733	0.121652	0.150421	2.77494e-08	-1.84273	down	--	--	Biological Process: signal transduction (GO:0007165);; Molecular Function: ADP binding (GO:0043531);;	K00695|2.9e-155|mtr:MTR_6g478030|K00695 sucrose synthase [EC:2.4.1.13] | (RefSeq) sucrose synthase	Starch and sucrose metabolism (ko00500)	--	--	TIR domain	TMV resistance protein N OS=Nicotiana glutinosa OX=35889 GN=N PE=1 SV=1	T	Signal transduction mechanisms	TMV resistance protein N-like isoform X3 [Prunus avium]
PaF106G0500019009.01	108	119	128	24	34	36	2.19947	2.91278	2.59295	0.52695	0.897273	0.762721	7.03203e-08	-1.53504	down	--	--	Molecular Function: pantothenate kinase activity (GO:0004594);; Molecular Function: ATP binding (GO:0005524);; Cellular Component: nucleus (GO:0005634);; Cellular Component: cytosol (GO:0005829);; Biological Process: coenzyme A biosynthetic process (GO:0015937);;	K09680|7.5e-35|pavi:110753247|K09680 type II pantothenate kinase [EC:2.7.1.33] | (RefSeq) pantothenate kinase 1 isoform X1	Pantothenate and CoA biosynthesis (ko00770)	[H]	Coenzyme transport and metabolism	Fumble	Pantothenate kinase 2 OS=Arabidopsis thaliana OX=3702 GN=PANK2 PE=1 SV=2	H	Coenzyme transport and metabolism	unnamed protein product [Prunus armeniaca]
PaF106G0100001881.01	263	214	233	474	371	575	2.54312	2.48069	2.32361	5.03867	4.22147	5.61637	8.77058e-11	1.03026	up	[T]	Signal transduction mechanisms	Molecular Function: ion channel activity (GO:0005216);; Cellular Component: integral component of membrane (GO:0016021);;	K05391|1.9e-301|pmum:103327048|K05391 cyclic nucleotide gated channel, plant | (RefSeq) cyclic nucleotide-gated ion channel 1-like	Plant-pathogen interaction (ko04626)	[PT]	Inorganic ion transport and metabolism;; Signal transduction mechanisms	Ion transport protein	Cyclic nucleotide-gated ion channel 1 OS=Arabidopsis thaliana OX=3702 GN=CNGC1 PE=1 SV=1	--	--	unnamed protein product [Prunus armeniaca]
PaF106G0500019684.01	1645	1402	1689	296	287	456	19.9185	20.3162	21.0906	3.89031	4.04959	5.51979	4.68896e-57	-2.04745	down	--	--	Molecular Function: GTPase activity (GO:0003924);; Molecular Function: structural constituent of cytoskeleton (GO:0005200);; Molecular Function: GTP binding (GO:0005525);; Cellular Component: cytoplasm (GO:0005737);; Cellular Component: microtubule (GO:0005874);; Biological Process: microtubule-based process (GO:0007017);;	K07375|2.4e-264|pavi:110758028|K07375 tubulin beta | (RefSeq) tubulin beta chain-like	Phagosome (ko04145)	[Z]	Cytoskeleton	Tubulin/FtsZ family, GTPase domain	Tubulin beta-4 chain OS=Oryza sativa subsp. japonica OX=39947 GN=TUBB4 PE=2 SV=1	Z	Cytoskeleton	PREDICTED: tubulin beta chain-like [Prunus mume]
PaF106G0100002088.01	488	256	245	118	138	157	5.43571	3.41162	2.81476	1.42582	1.79016	1.74464	1.32559e-05	-1.03505	down	[GI]	Carbohydrate transport and metabolism;; Lipid transport and metabolism	Molecular Function: pectinesterase activity (GO:0030599);; Biological Process: cell wall modification (GO:0042545);; Molecular Function: aspartyl esterase activity (GO:0045330);; Biological Process: pectin catabolic process (GO:0045490);; Molecular Function: pectinesterase inhibitor activity (GO:0046910);;	K01051|5.0e-132|hbr:110663013|K01051 pectinesterase [EC:3.1.1.11] | (RefSeq) pectinesterase 2-like isoform X1	Pentose and glucuronate interconversions (ko00040)	--	--	Pectinesterase	Probable pectinesterase/pectinesterase inhibitor 35 OS=Arabidopsis thaliana OX=3702 GN=PME35 PE=2 SV=1	T	Signal transduction mechanisms	unnamed protein product [Prunus armeniaca]
PaF106G0800031436.01	1032	801	648	305	260	241	35.7783	33.2449	23.1704	11.4832	10.4949	8.35594	2.52052e-15	-1.42703	down	--	--	Molecular Function: DNA binding (GO:0003677);; Cellular Component: nucleus (GO:0005634);;	K15397|4.2e-20|cpep:111776416|K15397 3-ketoacyl-CoA synthase [EC:2.3.1.199] | (RefSeq) 3-ketoacyl-CoA synthase 17-like	Fatty acid elongation (ko00062);; Plant-pathogen interaction (ko04626)	[O]	Posttranslational modification, protein turnover, chaperones	Myb-like DNA-binding domain	Protein RADIALIS-like 1 OS=Arabidopsis thaliana OX=3702 GN=RL1 PE=2 SV=1	K	Transcription	unnamed protein product [Prunus armeniaca]
PaF106G0400014719.01	144	134	164	775	631	817	0.697552	0.779283	0.819279	4.1025	3.5824	3.98012	2.89106e-56	2.31411	up	[R]	General function prediction only	Biological Process: signal transduction (GO:0007165);; Molecular Function: ADP binding (GO:0043531);;	K00695|2.7e-157|mtr:MTR_6g478030|K00695 sucrose synthase [EC:2.4.1.13] | (RefSeq) sucrose synthase	Starch and sucrose metabolism (ko00500)	--	--	TIR domain	Disease resistance protein Roq1 OS=Nicotiana benthamiana OX=4100 GN=ROQ1 PE=1 SV=1	--	--	PREDICTED: disease resistance protein TAO1-like [Prunus mume]
PaF106G0200007693.01	216	197	192	0	0	0	2.09538	2.2871	1.92008	0	0	0	2.36216e-49	-4.81949	down	--	--	--	K12447|4.0e-13|csat:109127935|K12447 UDP-sugar pyrophosphorylase [EC:2.7.7.64] | (RefSeq) uncharacterized protein LOC109127935	Pentose and glucuronate interconversions (ko00040);; Galactose metabolism (ko00052);; Ascorbate and aldarate metabolism (ko00053);; Amino sugar and nucleotide sugar metabolism (ko00520)	[R]	General function prediction only	--	--	L	Replication, recombination and repair	uncharacterized protein LOC109949182 [Prunus persica]
PaF106G0200009787.01	1	0	0	111	119	81	0.012435	0	0	2.22336	2.56172	1.48653	2.51118e-27	3.80474	up	--	--	--	K03097|4.1e-15|hbr:110638242|K03097 casein kinase II subunit alpha [EC:2.7.11.1] | (RefSeq) casein kinase II subunit alpha-4, chloroplastic-like	Ribosome biogenesis in eukaryotes (ko03008);; Circadian rhythm - plant (ko04712)	--	--	gag-polypeptide of LTR copia-type	--	S	Function unknown	PREDICTED: uncharacterized protein LOC103322584 [Prunus mume]
PaF106G0500020339.01	1777	1398	1383	2620	3044	3345	25.0243	24.3437	20.5746	42.3988	51.7527	49.4572	1.68475e-23	1.05209	up	--	--	Molecular Function: mRNA binding (GO:0003729);; Molecular Function: metal ion binding (GO:0046872);;	K12198|6.2e-18|pavi:110771223|K12198 charged multivesicular body protein 5 | (RefSeq) vacuolar protein sorting-associated protein 60.1-like isoform X1	Endocytosis (ko04144)	[R]	General function prediction only	Zinc finger C-x8-C-x5-C-x3-H type (and similar)	Zinc finger CCCH domain-containing protein 8 OS=Oryza sativa subsp. japonica OX=39947 GN=Os01g0616400 PE=2 SV=2	S	Function unknown	unnamed protein product [Prunus armeniaca]
PaF106G0600023074.01	58	49	91	191	351	309	1.35518	1.37617	2.21244	4.89106	9.65912	7.28646	5.66289e-13	1.89138	up	[IQR]	Lipid transport and metabolism;; Secondary metabolites biosynthesis, transport and catabolism;; General function prediction only	Molecular Function: oxidoreductase activity (GO:0016491);;	K13070|1.4e-76|dosa:Os04t0179200-01|K13070 momilactone-A synthase [EC:1.1.1.295] | (RefSeq) Os04g0179200, MAS, MOMILACTONE_A_SYNTHASE; Similar to Stem secoisolariciresinol dehydrogenase (Fragment).	Diterpenoid biosynthesis (ko00904)	[R]	General function prediction only	Enoyl-(Acyl carrier protein) reductase	Secoisolariciresinol dehydrogenase (Fragment) OS=Forsythia intermedia OX=55183 PE=1 SV=1	Q	Secondary metabolites biosynthesis, transport and catabolism	unnamed protein product [Prunus armeniaca]
PaF106G0600023307.01	106	66	61	251	237	198	1.85382	1.40679	1.05475	4.75488	4.75895	3.44064	1.30463e-09	1.4794	up	[I]	Lipid transport and metabolism	Molecular Function: 3-hydroxyisobutyryl-CoA hydrolase activity (GO:0003860);; Biological Process: valine catabolic process (GO:0006574);;	K05605|1.8e-83|pper:18781659|K05605 3-hydroxyisobutyryl-CoA hydrolase [EC:3.1.2.4] | (RefSeq) 3-hydroxyisobutyryl-CoA hydrolase-like protein 5 isoform X1	Valine, leucine and isoleucine degradation (ko00280);; beta-Alanine metabolism (ko00410);; Propanoate metabolism (ko00640);; Carbon metabolism (ko01200)	--	--	Enoyl-CoA hydratase/isomerase	3-hydroxyisobutyryl-CoA hydrolase-like protein 5 OS=Arabidopsis thaliana OX=3702 GN=At1g06550 PE=1 SV=2	I	Lipid transport and metabolism	unnamed protein product [Prunus armeniaca]
PaF106G0800031033.01	180	109	155	35	46	49	2.29998	1.68713	2.03547	0.487812	0.681455	0.656223	4.94498e-08	-1.44204	down	[Q]	Secondary metabolites biosynthesis, transport and catabolism	Molecular Function: diacylglycerol O-acyltransferase activity (GO:0004144);; Cellular Component: integral component of membrane (GO:0016021);; Biological Process: glycerolipid biosynthetic process (GO:0045017);;	K15406|5.4e-55|bna:106451554|K15406 wax-ester synthase / diacylglycerol O-acyltransferase [EC:2.3.1.75 2.3.1.20] | (RefSeq) O-acyltransferase WSD1	Cutin, suberine and wax biosynthesis (ko00073)	--	--	WS/DGAT C-terminal domain	O-acyltransferase WSD1 OS=Arabidopsis thaliana OX=3702 GN=WSD1 PE=2 SV=1	S	Function unknown	PREDICTED: O-acyltransferase WSD1-like [Prunus mume]
PaF106G0700026580.01	765	766	715	1787	2335	2943	13.4736	16.171	13.1714	36.1024	48.0676	52.6746	5.88663e-34	1.66434	up	[R]	General function prediction only	Molecular Function: O-methyltransferase activity (GO:0008171);; Biological Process: methylation (GO:0032259);;	K00588|2.2e-134|pmum:103340769|K00588 caffeoyl-CoA O-methyltransferase [EC:2.1.1.104] | (RefSeq) probable caffeoyl-CoA O-methyltransferase At4g26220	Phenylpropanoid biosynthesis (ko00940);; Flavonoid biosynthesis (ko00941);; Stilbenoid, diarylheptanoid and gingerol biosynthesis (ko00945)	[Q]	Secondary metabolites biosynthesis, transport and catabolism	O-methyltransferase	Probable caffeoyl-CoA O-methyltransferase At4g26220 OS=Arabidopsis thaliana OX=3702 GN=At4g26220 PE=2 SV=1	Q	Secondary metabolites biosynthesis, transport and catabolism	unnamed protein product [Prunus armeniaca]
PaF106G0100000111.01	115	84	113	14	19	16	3.49565	3.03472	3.55125	0.437239	0.648825	0.4624	1.9015e-11	-2.04021	down	[G]	Carbohydrate transport and metabolism	Molecular Function: molecular_function (GO:0003674);; Cellular Component: cellular_component (GO:0005575);; Cellular Component: intracellular (GO:0005622);; Cellular Component: cell (GO:0005623);; Cellular Component: nucleus (GO:0005634);; Biological Process: carbohydrate metabolic process (GO:0005975);; Biological Process: cellular protein modification process (GO:0006464);; Biological Process: …	K12160|2.1e-38|pmum:103324257|K12160 small ubiquitin-related modifier | (RefSeq) small ubiquitin-related modifier 1-like	RNA transport (ko03013)	[O]	Posttranslational modification, protein turnover, chaperones	Ubiquitin-2 like Rad60 SUMO-like	Alpha-glucan phosphorylase, H isozyme OS=Vicia faba OX=3906 PE=2 SV=1	O	Posttranslational modification, protein turnover, chaperones	small ubiquitin-related modifier 1 [Prunus persica]
PaF106G0500018645.01	377	266	341	806	755	707	8.36293	7.06581	7.80273	19.5046	19.589	15.7257	5.69447e-17	1.25599	up	[G]	Carbohydrate transport and metabolism	Biological Process: carbohydrate metabolic process (GO:0005975);; Molecular Function: glycogen phosphorylase activity (GO:0008184);; Molecular Function: pyridoxal phosphate binding (GO:0030170);; Molecular Function: SHG alpha-glucan phosphorylase activity (GO:0102499);;	K00688|4.5e-61|pmum:103324815|K00688 glycogen phosphorylase [EC:2.4.1.1] | (RefSeq) glycogen phosphorylase 1-like isoform X1	Starch and sucrose metabolism (ko00500)	[G]	Carbohydrate transport and metabolism	Carbohydrate phosphorylase	Alpha-glucan phosphorylase, H isozyme OS=Vicia faba OX=3906 PE=2 SV=1	G	Carbohydrate transport and metabolism	PREDICTED: alpha-glucan phosphorylase, H isozyme-like [Prunus mume]
PaF106G0300014486.01	901	595	790	1212	1385	1955	14.0601	11.8365	12.8596	19.0131	25.4558	30.9571	1.53578e-13	1.03976	up	[R]	General function prediction only	Molecular Function: molecular_function (GO:0003674);; Molecular Function: catalytic activity (GO:0003824);; Biological Process: cellular aldehyde metabolic process (GO:0006081);; Biological Process: organic acid metabolic process (GO:0006082);; Biological Process: lactate metabolic process (GO:0006089);; Biological Process: biological_process (GO:0008150);; Biological Process: metabolic process (…	K18881|1.9e-127|pmum:103327333|K18881 D-lactate dehydratase [EC:4.2.1.130] | (RefSeq) protein DJ-1 homolog D-like	Pyruvate metabolism (ko00620)	[RV]	General function prediction only;; Defense mechanisms	DJ-1/PfpI family	Protein DJ-1 homolog D OS=Arabidopsis thaliana OX=3702 GN=DJ1D PE=1 SV=1	V	Defense mechanisms	PREDICTED: protein DJ-1 homolog D-like [Prunus mume]
PaF106G0100000452.01	374	304	366	76	69	142	7.11154	6.95765	7.19614	1.61448	1.5336	2.67528	2.54015e-14	-1.63701	down	[Q]	Secondary metabolites biosynthesis, transport and catabolism	Molecular Function: metal ion binding (GO:0046872);; Molecular Function: dioxygenase activity (GO:0051213);;	K13229|1.1e-81|ats:109766943|K13229 2,4-dihydroxy-1,4-benzoxazin-3-one-glucoside dioxygenase [EC:1.14.11.59] | (RefSeq) LOC109766943; DIBOA-glucoside dioxygenase BX6-like	Benzoxazinoid biosynthesis (ko00402)	[QR]	Secondary metabolites biosynthesis, transport and catabolism;; General function prediction only	2OG-Fe(II) oxygenase superfamily	1-aminocyclopropane-1-carboxylate oxidase homolog 1 OS=Arabidopsis thaliana OX=3702 GN=At1g06620 PE=2 SV=1	Q	Secondary metabolites biosynthesis, transport and catabolism	PREDICTED: 1-aminocyclopropane-1-carboxylate oxidase homolog 1-like [Prunus mume]
PaF106G0800031588.01	688	513	499	227	234	288	27.5009	24.5419	20.5603	9.87716	10.8872	11.4961	9.45253e-12	-1.04682	down	--	--	Biological Process: response to auxin (GO:0009733);;	K14488|3.4e-73|pper:18768105|K14488 SAUR family protein | (RefSeq) auxin-responsive protein SAUR50	Plant hormone signal transduction (ko04075)	--	--	Auxin responsive protein	Auxin-responsive protein SAUR50 OS=Arabidopsis thaliana OX=3702 GN=SAUR50 PE=1 SV=1	S	Function unknown	auxin-responsive protein SAUR50 [Prunus persica]
PaF106G0600021566.01	53	25	46	298	239	348	0.413644	0.235091	0.374087	2.57303	2.21069	2.76122	9.25449e-31	2.6173	up	--		Molecular Function: protein serine/threonine kinase activity (GO:0004674);; Molecular Function: ATP binding (GO:0005524);; Cellular Component: integral component of membrane (GO:0016021);; Molecular Function: carbohydrate binding (GO:0030246);; Biological Process: recognition of pollen (GO:0048544);;	K13416|6.6e-58|mdm:103416332|K13416 brassinosteroid insensitive 1-associated receptor kinase 1 [EC:2.7.10.1 2.7.11.1] | (RefSeq) BRASSINOSTEROID INSENSITIVE 1-associated receptor kinase 1-like isoform X1	MAPK signaling pathway - plant (ko04016);; Plant hormone signal transduction (ko04075);; Plant-pathogen interaction (ko04626)	--	--	Protein kinase domain	G-type lectin S-receptor-like serine/threonine-protein kinase RLK1 OS=Arabidopsis thaliana OX=3702 GN=RLK1 PE=2 SV=2	T	Signal transduction mechanisms	PREDICTED: G-type lectin S-receptor-like serine/threonine-protein kinase RLK1 [Prunus mume]
PaF106G0200009647.01	0	0	0	91	80	121	0	0	0	1.93035	1.71577	2.38579	1.72974e-28	3.88555	up	--	--	Molecular Function: protein kinase activity (GO:0004672);; Molecular Function: ATP binding (GO:0005524);; Cellular Component: integral component of membrane (GO:0016021);;	K05391|3.8e-77|pmum:103322391|K05391 cyclic nucleotide gated channel, plant | (RefSeq) cyclic nucleotide-gated ion channel 1-like	Plant-pathogen interaction (ko04626)	[PT]	Inorganic ion transport and metabolism;; Signal transduction mechanisms	--	Cyclic nucleotide-gated ion channel 1 OS=Arabidopsis thaliana OX=3702 GN=CNGC1 PE=1 SV=1	--	--	cyclic nucleotide-gated ion channel 1 [Prunus persica]
PaF106G0300013971.01	226	152	198	737	701	957	1.67445	1.34309	1.51124	5.94713	6.06982	7.10693	2.99383e-49	2.06289	up	--	--	Biological Process: telomere maintenance (GO:0000723);; Molecular Function: DNA helicase activity (GO:0003678);; Molecular Function: ATP binding (GO:0005524);; Biological Process: DNA repair (GO:0006281);; Biological Process: DNA recombination (GO:0006310);;	K07466|2.2e-119|pper:18792188|K07466 replication factor A1 | (RefSeq) replication protein A 70 kDa DNA-binding subunit B	DNA replication (ko03030);; Nucleotide excision repair (ko03420);; Mismatch repair (ko03430);; Homologous recombination (ko03440)	--	--	Replication factor-A C terminal domain	--	L	Replication, recombination and repair	unnamed protein product [Prunus armeniaca]
PaF106G0100006388.01	375	228	271	648	713	822	2.09764	1.52264	1.55988	3.94546	4.65142	4.6007	2.5662e-19	1.35846	up	[R]	General function prediction only	Biological Process: signal transduction (GO:0007165);; Molecular Function: ADP binding (GO:0043531);;	K00695|5.2e-84|mtr:MTR_6g478030|K00695 sucrose synthase [EC:2.4.1.13] | (RefSeq) sucrose synthase	Starch and sucrose metabolism (ko00500)	--	--	NB-ARC domain	TMV resistance protein N OS=Nicotiana glutinosa OX=35889 GN=N PE=1 SV=1	T	Signal transduction mechanisms	TMV resistance protein N [Prunus persica]
PaF106G0800032650.01	165	187	170	20	28	40	1.02453	1.38963	1.08993	0.131883	0.200738	0.243386	2.07463e-15	-2.12484	down	[R]	General function prediction only	Biological Process: signal transduction (GO:0007165);; Molecular Function: ADP binding (GO:0043531);;	K00695|1.7e-117|mtr:MTR_6g478030|K00695 sucrose synthase [EC:2.4.1.13] | (RefSeq) sucrose synthase	Starch and sucrose metabolism (ko00500)	--	--	TIR domain	TMV resistance protein N OS=Nicotiana glutinosa OX=35889 GN=N PE=1 SV=1	S	Function unknown	PREDICTED: TMV resistance protein N-like [Prunus mume]
PaF106G0400015902.01	12958	11780	11821	575	1299	1077	132.571	144.233	124.754	6.39286	15.5065	11.0324	3.63108e-23	-2.87399	down	--	--	Molecular Function: magnesium ion binding (GO:0000287);; Molecular Function: terpene synthase activity (GO:0010333);;	K15803|0.0e+00|pmum:103343924|K15803 (-)-germacrene D synthase [EC:4.2.3.75] | (RefSeq) (-)-alpha-pinene synthase-like	Sesquiterpenoid and triterpenoid biosynthesis (ko00909)	--	--	Terpene synthase family, metal binding domain	(-)-alpha-pinene synthase OS=Fragaria vesca OX=57918 PE=1 SV=2	S	Function unknown	PREDICTED: (-)-alpha-pinene synthase-like [Prunus mume]
PaF106G0300014492.01	943	666	811	2515	2699	3805	16.5747	14.0028	14.6915	48.1012	55.3746	66.947	1.90115e-62	1.93049	up	[R]	General function prediction only	Molecular Function: molecular_function (GO:0003674);; Molecular Function: catalytic activity (GO:0003824);; Biological Process: cellular aldehyde metabolic process (GO:0006081);; Biological Process: organic acid metabolic process (GO:0006082);; Biological Process: lactate metabolic process (GO:0006089);; Biological Process: biological_process (GO:0008150);; Biological Process: metabolic process (…	K18881|2.8e-227|pmum:103327333|K18881 D-lactate dehydratase [EC:4.2.1.130] | (RefSeq) protein DJ-1 homolog D-like	Pyruvate metabolism (ko00620)	[RV]	General function prediction only;; Defense mechanisms	DJ-1/PfpI family	Protein DJ-1 homolog D OS=Arabidopsis thaliana OX=3702 GN=DJ1D PE=1 SV=1	V	Defense mechanisms	PREDICTED: protein DJ-1 homolog D-like [Prunus mume]
PaF106G0100002794.01	135	129	101	43	26	46	1.57317	1.79732	1.21003	0.539947	0.345974	0.531605	3.12443e-06	-1.33409	down	--	--	Molecular Function: iron ion binding (GO:0005506);; Cellular Component: membrane (GO:0016020);; Molecular Function: oxidoreductase activity, acting on paired donors, with incorporation or reduction of molecular oxygen, NAD(P)H as one donor, and incorporation of one atom of oxygen (GO:0016709);; Molecular Function: heme binding (GO:0020037);;	K23810|7.5e-70|vvi:100254114|K23810 (E)-8-carboxylinalool synthase [EC:1.14.14.-] | (RefSeq) geraniol 8-hydroxylase	Monoterpenoid biosynthesis (ko00902)	[Q]	Secondary metabolites biosynthesis, transport and catabolism	Cytochrome P450	Geraniol 8-hydroxylase OS=Catharanthus roseus OX=4058 GN=CYP76B6 PE=1 SV=1	Q	Secondary metabolites biosynthesis, transport and catabolism	unnamed protein product [Prunus armeniaca]
PaF106G0800032487.01	182	168	108	2628	2565	3214	0.93168	1.02087	0.63051	15.4305	15.8986	17.1638	6.75962e-188	4.11077	up	[R]	General function prediction only	Biological Process: signal transduction (GO:0007165);; Molecular Function: ADP binding (GO:0043531);;	K00695|2.4e-101|mtr:MTR_6g478030|K00695 sucrose synthase [EC:2.4.1.13] | (RefSeq) sucrose synthase	Starch and sucrose metabolism (ko00500)	--	--	TIR domain	Disease resistance protein Roq1 OS=Nicotiana benthamiana OX=4100 GN=ROQ1 PE=1 SV=1	S	Function unknown	PREDICTED: TMV resistance protein N-like isoform X2 [Prunus mume]
PaF106G0800031731.01	78	39	29	118	129	81	1.26643	0.756069	0.484512	2.09197	2.4499	1.30788	0.00257371	1.00956	up	[HR]	Coenzyme transport and metabolism;; General function prediction only	Biological Process: sucrose metabolic process (GO:0005985);; Molecular Function: sucrose synthase activity (GO:0016157);; Molecular Function: sucrose-phosphate synthase activity (GO:0046524);;	K00696|4.2e-55|pavi:110746034|K00696 sucrose-phosphate synthase [EC:2.4.1.14] | (RefSeq) probable sucrose-phosphate synthase 2	Starch and sucrose metabolism (ko00500)	[M]	Cell wall/membrane/envelope biogenesis	--	Probable sucrose-phosphate synthase 1 OS=Oryza sativa subsp. indica OX=39946 GN=SPS1 PE=2 SV=2	M	Cell wall/membrane/envelope biogenesis	unnamed protein product [Prunus armeniaca]
PaF106G0700027537.01	119	91	112	473	489	763	1.67539	1.53054	1.6254	7.29138	8.0923	10.8338	2.93524e-40	2.34393	up	[I]	Lipid transport and metabolism	Biological Process: lipid metabolic process (GO:0006629);;	K16818|3.4e-06|dct:110113683|K16818 phospholipase A1 [EC:3.1.1.32] | (RefSeq) phospholipase A(1) DAD1, chloroplastic-like	Glycerophospholipid metabolism (ko00564);; alpha-Linolenic acid metabolism (ko00592)	[I]	Lipid transport and metabolism	Lipase (class 3)	Triacylglycerol lipase OBL1 OS=Nicotiana tabacum OX=4097 GN=OBL1 PE=1 SV=1	I	Lipid transport and metabolism	uncharacterized protein LOC117635169 [Prunus dulcis]
PaF106G0600022511.01	323	304	324	116	97	145	8.70904	9.80061	9.00609	3.38157	3.05145	3.9054	1.08537e-11	-1.24989	down	[I]	Lipid transport and metabolism	--	K18532|2.9e-53|vvi:100253475|K18532 adenylate kinase [EC:2.7.4.3] | (RefSeq) (R)-specific enoyl-CoA hydratase	Purine metabolism (ko00230);; Ribosome biogenesis in eukaryotes (ko03008)	[I]	Lipid transport and metabolism	MaoC like domain	--	I	Lipid transport and metabolism	PREDICTED: (R)-specific enoyl-CoA hydratase [Prunus mume]
PaF106G0200010362.01	4637	4023	4133	1698	1755	2026	54.5466	56.6289	50.1533	21.7341	24.087	23.8521	1.51391e-46	-1.12401	down	[G]	Carbohydrate transport and metabolism	Cellular Component: phosphopyruvate hydratase complex (GO:0000015);; Molecular Function: magnesium ion binding (GO:0000287);; Molecular Function: phosphopyruvate hydratase activity (GO:0004634);; Biological Process: glycolytic process (GO:0006096);; Biological Process: regulation of vacuole fusion, non-autophagic (GO:0032889);;	K01689|5.7e-253|pmum:103333317|K01689 enolase [EC:4.2.1.11] | (RefSeq) enolase	Glycolysis / Gluconeogenesis (ko00010);; Carbon metabolism (ko01200);; Biosynthesis of amino acids (ko01230);; RNA degradation (ko03018)	[G]	Carbohydrate transport and metabolism	Enolase, C-terminal TIM barrel domain	Enolase OS=Oryza sativa subsp. japonica OX=39947 GN=ENO1 PE=1 SV=2	G	Carbohydrate transport and metabolism	PREDICTED: enolase [Prunus mume]
PaF106G0100002227.01	140	163	198	408	386	432	2.68425	3.82189	3.97469	8.65515	10.2645	9.98206	2.43166e-12	1.28708	up	--	--	Cellular Component: Golgi membrane (GO:0000139);; Biological Process: pectin biosynthetic process (GO:0045489);; Molecular Function: polygalacturonate 4-alpha-galacturonosyltransferase activity (GO:0047262);; Biological Process: cell wall organization (GO:0071555);;	K13648|3.4e-28|pmum:103331935|K13648 alpha-1,4-galacturonosyltransferase [EC:2.4.1.43] | (RefSeq) polygalacturonate 4-alpha-galacturonosyltransferase isoform X1	Amino sugar and nucleotide sugar metabolism (ko00520)	--	--	--	Polygalacturonate 4-alpha-galacturonosyltransferase OS=Arabidopsis thaliana OX=3702 GN=GAUT1 PE=1 SV=1	G	Carbohydrate transport and metabolism	unnamed protein product [Prunus armeniaca]
PaF106G0800030461.01	162	216	187	2321	2143	2971	1.15465	1.76331	1.16897	14.9011	14.2372	16.7217	2.97412e-154	3.64292	up	[R]	General function prediction only	Biological Process: signal transduction (GO:0007165);; Molecular Function: ADP binding (GO:0043531);;	K00695|7.0e-102|mtr:MTR_6g478030|K00695 sucrose synthase [EC:2.4.1.13] | (RefSeq) sucrose synthase	Starch and sucrose metabolism (ko00500)	--	--	TIR domain	TMV resistance protein N OS=Nicotiana glutinosa OX=35889 GN=N PE=1 SV=1	S	Function unknown	PREDICTED: TMV resistance protein N-like [Prunus mume]
PaF106G0400014870.01	50	60	73	6	0	13	1.08514	1.52977	1.67165	0.12164	0	0.263918	1.56942e-06	-1.83136	down	--	--	Molecular Function: DNA binding (GO:0003677);; Molecular Function: DNA topoisomerase type I activity (GO:0003917);; Molecular Function: protein kinase activity (GO:0004672);; Molecular Function: ATP binding (GO:0005524);; Biological Process: DNA topological change (GO:0006265);; Molecular Function: zinc ion binding (GO:0008270);;	K03165|1.4e-96|pavi:110754242|K03165 DNA topoisomerase III [EC:5.6.2.1] | (RefSeq) DNA topoisomerase 3-alpha isoform X1	Homologous recombination (ko03440)	[L]	Replication, recombination and repair	GRF zinc finger	DNA topoisomerase 3-alpha OS=Arabidopsis thaliana OX=3702 GN=TOP3A PE=1 SV=1	L	Replication, recombination and repair	unnamed protein product [Prunus armeniaca]
Prunus_sibirica_newGene_1238	10	7	0	327	240	304	0.1177	0.103068	0	4.64229	3.74492	4.08598	2.74907e-09	2.27979	up	--	--	--	K12447|4.3e-57|csat:109127935|K12447 UDP-sugar pyrophosphorylase [EC:2.7.7.64] | (RefSeq) uncharacterized protein LOC109127935	Pentose and glucuronate interconversions (ko00040);; Galactose metabolism (ko00052);; Ascorbate and aldarate metabolism (ko00053);; Amino sugar and nucleotide sugar metabolism (ko00520)	[R]	General function prediction only	gag-polypeptide of LTR copia-type	--	L	Replication, recombination and repair	uncharacterized protein LOC109947549 isoform X1 [Prunus persica]
PaF106G0800031390.01	3	0	0	112	122	137	0.078899	0	0	4.4458	5.20671	5.01953	3.20611e-33	4.03282	up	--	--	Biological Process: dolichol biosynthetic process (GO:0019408);; Cellular Component: dehydrodolichyl diphosphate synthase complex (GO:1904423);;	K11778|1.4e-22|pmum:103335624|K11778 ditrans,polycis-polyprenyl diphosphate synthase [EC:2.5.1.87] | (RefSeq) dehydrodolichyl diphosphate syntase complex subunit NUS1-like	Terpenoid backbone biosynthesis (ko00900)	--	--	--	--	I	Lipid transport and metabolism	Undecaprenyl pyrophosphate synthetase family protein [Prunus dulcis]
PaF106G0300013292.01	575	312	508	196	124	253	7.1016	4.60086	6.4673	2.62939	1.78477	3.12195	7.18508e-07	-1.09137	down	--	--	Biological Process: lipid metabolic process (GO:0006629);; Molecular Function: phosphatidylcholine 1-acylhydrolase activity (GO:0008970);;	K16818|9.2e-41|egr:104446339|K16818 phospholipase A1 [EC:3.1.1.32] | (RefSeq) phospholipase A(1) DAD1, chloroplastic	Glycerophospholipid metabolism (ko00564);; alpha-Linolenic acid metabolism (ko00592)	[I]	Lipid transport and metabolism	Lipase (class 3)	Phospholipase A1-IIdelta OS=Arabidopsis thaliana OX=3702 GN=At2g42690 PE=1 SV=1	I	Lipid transport and metabolism	unnamed protein product [Prunus armeniaca]
PaF106G0200007099.01	178	161	161	35	33	70	3.22235	3.49308	2.99575	0.687818	0.683635	1.26355	6.93139e-09	-1.54279	down	--	--	Molecular Function: ADP binding (GO:0043531);;	K13459|1.1e-16|vvi:104880792|K13459 disease resistance protein RPS2 | (RefSeq) probable disease resistance protein At4g27220	Plant-pathogen interaction (ko04626)	--	--	--	--	--	--	unnamed protein product [Prunus armeniaca]
PaF106G0100005920.01	1853	1851	1896	3673	4136	3993	22.0363	27.939	23.9216	49.3355	60.3524	49.29	1.98897e-26	1.14011	up	--	--	Molecular Function: protein binding (GO:0005515);;	K12880|8.9e-07|nau:109212797|K12880 THO complex subunit 3 | (RefSeq) THO complex subunit 3	RNA transport (ko03013);; Spliceosome (ko03040)	--	--	Anaphase-promoting complex subunit 4 WD40 domain	--	S	Function unknown	uncharacterized WD repeat-containing protein C2A9.03-like isoform X4 [Prunus avium]
PaF106G0400015256.01	175	173	185	0	0	0	4.85763	5.72767	5.27803	0	0	0	1.42915e-44	-4.63631	down	[Q]	Secondary metabolites biosynthesis, transport and catabolism	Molecular Function: oxidoreductase activity (GO:0016491);; Molecular Function: metal ion binding (GO:0046872);;	K05278|4.0e-30|psom:113346476|K05278 flavonol synthase [EC:1.14.20.6] | (RefSeq) flavonol synthase/flavanone 3-hydroxylase-like	Flavonoid biosynthesis (ko00941)	[QR]	Secondary metabolites biosynthesis, transport and catabolism;; General function prediction only	2OG-Fe(II) oxygenase superfamily	Probable 2-oxoglutarate-dependent dioxygenase At5g05600 OS=Arabidopsis thaliana OX=3702 GN=At5g05600 PE=2 SV=1	Q	Secondary metabolites biosynthesis, transport and catabolism	unnamed protein product [Prunus armeniaca]
PaF106G0400015188.01	6583	6010	6665	3237	2653	2961	88.1177	96.2736	92.0292	47.1471	41.4484	39.6797	3.64079e-25	-1.01321	down	--	--	Cellular Component: integral component of membrane (GO:0016021);;	K00858|1.8e-18|egr:104421503|K00858 NAD+ kinase [EC:2.7.1.23] | (RefSeq) putative NAD kinase 3 isoform X1	Nicotinate and nicotinamide metabolism (ko00760)	--	--	Protein RETICULATA-related	Protein RETICULATA-RELATED 4, chloroplastic OS=Arabidopsis thaliana OX=3702 GN=RER4 PE=2 SV=1	S	Function unknown	unnamed protein product [Prunus armeniaca]
PaF106G0100005795.01	1024	676	1027	341	244	329	17.6346	13.9195	18.2354	6.39105	4.90252	5.6651	4.10999e-19	-1.41167	down	[Q]	Secondary metabolites biosynthesis, transport and catabolism	Molecular Function: metal ion binding (GO:0046872);; Molecular Function: dioxygenase activity (GO:0051213);;	K05278|5.4e-192|pmum:103332906|K05278 flavonol synthase [EC:1.14.20.6] | (RefSeq) flavonol synthase/flavanone 3-hydroxylase-like	Flavonoid biosynthesis (ko00941)	[QR]	Secondary metabolites biosynthesis, transport and catabolism;; General function prediction only	2OG-Fe(II) oxygenase superfamily	Flavonol synthase/flavanone 3-hydroxylase OS=Citrus unshiu OX=55188 GN=FLS PE=1 SV=1	Q	Secondary metabolites biosynthesis, transport and catabolism	unnamed protein product [Prunus armeniaca]
PaF106G0800032652.01	2	0	0	383	491	455	0.008795	0	0	2.10983	2.90043	2.30391	4.10651e-86	5.84896	up	[R]	General function prediction only	Biological Process: signal transduction (GO:0007165);; Molecular Function: ADP binding (GO:0043531);;	K00695|2.5e-129|mtr:MTR_6g478030|K00695 sucrose synthase [EC:2.4.1.13] | (RefSeq) sucrose synthase	Starch and sucrose metabolism (ko00500)	--	--	TIR domain	TMV resistance protein N OS=Nicotiana glutinosa OX=35889 GN=N PE=1 SV=1	S	Function unknown	PREDICTED: TMV resistance protein N-like [Prunus mume]
PaF106G0400016240.01	672	379	414	100	129	216	11.7968	7.96547	7.49327	1.89575	2.64383	3.78563	1.04169e-10	-1.47415	down	--	--	Cellular Component: cellular_component (GO:0005575);; Cellular Component: intracellular (GO:0005622);; Cellular Component: cell (GO:0005623);; Cellular Component: cytoplasm (GO:0005737);; Cellular Component: endosome (GO:0005768);; Cellular Component: Golgi apparatus (GO:0005794);; Cellular Component: trans-Golgi network (GO:0005802);; Biological Process: response to stress (GO:0006950);; Biologi…	K12472|1.0e-25|bvg:104885038|K12472 epidermal growth factor receptor substrate 15 | (RefSeq) filaggrin-like	Endocytosis (ko04144)	--	--	BURP domain	BURP domain protein RD22 OS=Arabidopsis thaliana OX=3702 GN=RD22 PE=2 SV=1	S	Function unknown	PREDICTED: BURP domain protein RD22-like [Prunus mume]
PaF106G0600023944.01	5	0	7	82	80	126	0.028892	0	0.051009	0.638133	0.664909	0.905686	6.94196e-19	3.04478	up	[R]	General function prediction only	Biological Process: defense response (GO:0006952);; Molecular Function: ADP binding (GO:0043531);;	K13457|0.0e+00|pmum:103334422|K13457 disease resistance protein RPM1 | (RefSeq) disease resistance protein RPM1-like	Plant-pathogen interaction (ko04626)	[T]	Signal transduction mechanisms	NB-ARC domain	Disease resistance protein RPM1 OS=Arabidopsis thaliana OX=3702 GN=RPM1 PE=1 SV=1	T	Signal transduction mechanisms	PREDICTED: disease resistance protein RPM1-like [Prunus mume]
PaF106G0700026837.01	1213	933	1080	2566	2456	2940	16.0005	14.3134	14.6199	38.7248	40.5387	40.4706	1.45126e-62	1.37608	up	[GI]	Carbohydrate transport and metabolism;; Lipid transport and metabolism	Cellular Component: extracellular region (GO:0005576);; Cellular Component: cell wall (GO:0005618);; Molecular Function: pectinesterase activity (GO:0030599);; Biological Process: cell wall modification (GO:0042545);; Molecular Function: aspartyl esterase activity (GO:0045330);; Biological Process: pectin catabolic process (GO:0045490);; Molecular Function: pectinesterase inhibitor activity (GO:0…	K01051|6.8e-298|pmum:103340502|K01051 pectinesterase [EC:3.1.1.11] | (RefSeq) pectinesterase/pectinesterase inhibitor PPE8B	Pentose and glucuronate interconversions (ko00040)	--	--	Pectinesterase	Pectinesterase/pectinesterase inhibitor PPE8B OS=Prunus persica OX=3760 PE=2 SV=1	G	Carbohydrate transport and metabolism	unnamed protein product [Prunus armeniaca]
PaF106G0200008766.01	670	488	624	1259	1309	1355	14.5616	12.6897	13.997	29.79	33.2308	29.5066	2.09715e-26	1.20743	up	[I]	Lipid transport and metabolism	Molecular Function: hydrolase activity (GO:0016787);;	K22097|1.3e-70|psom:113323289|K22097 3-O-acetylpapaveroxine carboxylesterase [EC:3.1.1.105] | (RefSeq) carboxylesterase 1-like	Isoquinoline alkaloid biosynthesis (ko00950)	[V]	Defense mechanisms	alpha/beta hydrolase fold	Probable carboxylesterase 9 OS=Arabidopsis thaliana OX=3702 GN=CXE9 PE=2 SV=1	V	Defense mechanisms	unnamed protein product [Prunus armeniaca]
PaF106G0600024431.01	6424	5630	5287	2198	2199	3316	57.8199	60.6948	49.0581	21.5318	23.0767	29.8452	1.25727e-21	-1.07199	down	[T]	Signal transduction mechanisms	Biological Process: phosphorelay signal transduction system (GO:0000160);; Cellular Component: nucleus (GO:0005634);;	K12129|0.0e+00|pmum:103340410|K12129 pseudo-response regulator 7 | (RefSeq) two-component response regulator-like APRR7 isoform X1	Circadian rhythm - plant (ko04712)	[K]	Transcription	Response regulator receiver domain	Two-component response regulator-like APRR7 OS=Arabidopsis thaliana OX=3702 GN=APRR7 PE=1 SV=1	K	Transcription	unnamed protein product [Prunus armeniaca]
PaF106G0700027837.01	77	79	107	9	6	6	1.01024	1.24051	1.4408	0.116292	0.083256	0.074674	9.25323e-14	-2.50404	down	[O]	Posttranslational modification, protein turnover, chaperones	Molecular Function: ATP binding (GO:0005524);; Cellular Component: cytoplasm (GO:0005737);; Biological Process: response to unfolded protein (GO:0006986);; Molecular Function: ATPase activity (GO:0016887);; Molecular Function: heat shock protein binding (GO:0031072);; Biological Process: cellular response to unfolded protein (GO:0034620);; Biological Process: protein refolding (GO:0042026);; Mole…	K03283|5.5e-276|pmum:103341785|K03283 heat shock 70kDa protein 1/2/6/8 | (RefSeq) heat shock cognate 70 kDa protein-like	Spliceosome (ko03040);; Protein processing in endoplasmic reticulum (ko04141);; Endocytosis (ko04144)	[O]	Posttranslational modification, protein turnover, chaperones	Hsp70 protein	Heat shock cognate 70 kDa protein OS=Petunia hybrida OX=4102 GN=HSP70 PE=2 SV=1	O	Posttranslational modification, protein turnover, chaperones	PREDICTED: heat shock cognate 70 kDa protein-like [Prunus mume]
PaF106G0300012314.01	91	50	34	123	171	204	1.14978	0.750265	0.437414	1.70513	2.5409	2.60318	6.60228e-06	1.3273	up	[G]	Carbohydrate transport and metabolism	Molecular Function: UDP-glycosyltransferase activity (GO:0008194);; Cellular Component: intracellular membrane-bounded organelle (GO:0043231);; Molecular Function: quercetin 3-O-glucosyltransferase activity (GO:0080043);; Molecular Function: quercetin 7-O-glucosyltransferase activity (GO:0080044);;	K22706|2.3e-127|pmum:103319663|K22706 (R)-mandelonitrile beta-glucosyltransferase [EC:2.4.1.354] | (RefSeq) 7-deoxyloganetin glucosyltransferase-like	Cyanoamino acid metabolism (ko00460)	[GC]	Carbohydrate transport and metabolism;; Energy production and conversion	UDP-glucoronosyl and UDP-glucosyl transferase	7-deoxyloganetin glucosyltransferase OS=Gardenia jasminoides OX=114476 GN=UGT85A24 PE=1 SV=1	--	--	PREDICTED: 7-deoxyloganetin glucosyltransferase-like [Prunus mume]
PaF106G0800032347.01	53	48	105	2	0	0	2.21643	2.40705	4.52736	0.072033	0	0	1.72829e-14	-2.8538	down	--	--	--	K02947|5.9e-30|pmum:103319527|K02947 small subunit ribosomal protein S10e | (RefSeq) 40S ribosomal protein S10-like	Ribosome (ko03010)	--	--	--	--	--	--	uncharacterized protein LOC18766107 [Prunus persica]
PaF106G0400015286.01	63	49	61	0	0	0	1.23459	1.14441	1.24641	0	0	0	4.71414e-16	-3.01263	down	--	--	Cellular Component: integral component of membrane (GO:0016021);;	K13466|3.3e-06|vvi:100256083|K13466 EIX receptor 1/2 | (RefSeq) receptor-like protein 12	Plant-pathogen interaction (ko04626)	--	--	Leucine Rich repeats (2 copies)	--	T	Signal transduction mechanisms	PREDICTED: receptor-like protein 2 [Prunus mume]
PaF106G0800031596.01	95	73	69	234	285	293	3.57314	3.26743	2.6646	9.59725	12.5551	11.0822	8.29285e-17	1.71642	up	--	--	Biological Process: response to auxin (GO:0009733);;	K14488|2.1e-69|pmum:103335786|K14488 SAUR family protein | (RefSeq) indole-3-acetic acid-induced protein ARG7-like	Plant hormone signal transduction (ko04075)	--	--	Auxin responsive protein	Indole-3-acetic acid-induced protein ARG7 OS=Vigna radiata var. radiata OX=3916 GN=ARG7 PE=2 SV=1	S	Function unknown	PREDICTED: indole-3-acetic acid-induced protein ARG7-like [Prunus mume]
PaF106G0200008090.01	54	46	59	188	161	154	0.698606	0.710326	0.776286	2.60772	2.44	1.93443	2.5757e-10	1.55291	up	[M]	Cell wall/membrane/envelope biogenesis	Molecular Function: hydrolase activity, acting on ester bonds (GO:0016788);;	K01114|5.1e-298|pmum:103331281|K01114 phospholipase C [EC:3.1.4.3] | (RefSeq) non-specific phospholipase C3-like isoform X1	Inositol phosphate metabolism (ko00562);; Glycerophospholipid metabolism (ko00564);; Ether lipid metabolism (ko00565)	--	--	Phosphoesterase family	Non-specific phospholipase C3 OS=Arabidopsis thaliana OX=3702 GN=NPC3 PE=2 SV=1	M	Cell wall/membrane/envelope biogenesis	unnamed protein product [Prunus armeniaca]
PaF106G0800032310.01	286	285	284	607	564	795	1.42608	1.702	1.46185	3.29699	3.28878	3.97343	2.23805e-18	1.22894	up	[R]	General function prediction only	Biological Process: signal transduction (GO:0007165);; Cellular Component: integral component of membrane (GO:0016021);; Molecular Function: ADP binding (GO:0043531);;	K00695|3.3e-133|mtr:MTR_6g478030|K00695 sucrose synthase [EC:2.4.1.13] | (RefSeq) sucrose synthase	Starch and sucrose metabolism (ko00500)	--	--	TIR domain	TMV resistance protein N OS=Nicotiana glutinosa OX=35889 GN=N PE=1 SV=1	S	Function unknown	TMV resistance protein N-like [Prunus dulcis]
PaF106G0800031748.01	567	500	627	1516	1449	1492	4.61178	4.58804	5.00235	13.6763	13.1673	11.697	1.01738e-35	1.45171	up	[J]	Translation, ribosomal structure and biogenesis	Molecular Function: aminoacyl-tRNA ligase activity (GO:0004812);; Molecular Function: threonine-tRNA ligase activity (GO:0004829);; Molecular Function: ATP binding (GO:0005524);; Cellular Component: mitochondrion (GO:0005739);; Biological Process: tRNA aminoacylation for protein translation (GO:0006418);; Biological Process: threonyl-tRNA aminoacylation (GO:0006435);; Cellular Component: chloropl…	K01868|0.0e+00|pmum:103335890|K01868 threonyl-tRNA synthetase [EC:6.1.1.3] | (RefSeq) threonine--tRNA ligase, mitochondrial 1-like	Aminoacyl-tRNA biosynthesis (ko00970)	[J]	Translation, ribosomal structure and biogenesis	tRNA synthetase class II core domain (G, H, P, S and T)	Threonine--tRNA ligase, mitochondrial 1 OS=Arabidopsis thaliana OX=3702 GN=THRRS PE=1 SV=3	J	Translation, ribosomal structure and biogenesis	unnamed protein product [Prunus armeniaca]
PaF106G0100006463.01	2301	2018	1857	430	365	540	19.2134	20.1922	15.9639	3.92897	3.55713	4.55451	1.57645e-70	-2.07694	down	[G]	Carbohydrate transport and metabolism	Molecular Function: hydrolase activity, hydrolyzing O-glycosyl compounds (GO:0004553);; Molecular Function: xylan 1,4-beta-xylosidase activity (GO:0009044);; Cellular Component: plant-type cell wall (GO:0009505);; Biological Process: arabinan catabolic process (GO:0031222);; Biological Process: xylan catabolic process (GO:0045493);; Molecular Function: alpha-L-arabinofuranosidase activity (GO:004…	K15920|0.0e+00|pmum:103319154|K15920 xylan 1,4-beta-xylosidase [EC:3.2.1.37] | (RefSeq) beta-xylosidase/alpha-L-arabinofuranosidase 2	Amino sugar and nucleotide sugar metabolism (ko00520)	--	--	Glycosyl hydrolase family 3 C-terminal domain	Beta-xylosidase/alpha-L-arabinofuranosidase 2 OS=Medicago sativa subsp. varia OX=36902 GN=Xyl2 PE=2 SV=1	G	Carbohydrate transport and metabolism	unnamed protein product [Prunus armeniaca]
PaF106G0800029394.01	58	41	55	129	152	163	0.962272	0.799606	0.943292	2.34257	2.95755	2.71266	6.47744e-09	1.43141	up	[V]	Defense mechanisms	Cellular Component: plant-type vacuole (GO:0000325);; Molecular Function: ATP binding (GO:0005524);; Cellular Component: vacuolar membrane (GO:0005774);; Cellular Component: membrane (GO:0016020);; Cellular Component: integral component of membrane (GO:0016021);; Molecular Function: ATPase activity (GO:0016887);; Molecular Function: ATPase activity, coupled to transmembrane movement of substances…	K05666|9.8e-134|pmum:103334086|K05666 ATP-binding cassette, subfamily C (CFTR/MRP), member 2 | (RefSeq) LOW QUALITY PROTEIN: ABC transporter C family member 14-like	ABC transporters (ko02010)	[Q]	Secondary metabolites biosynthesis, transport and catabolism	ABC transporter	ABC transporter C family member 4 OS=Arabidopsis thaliana OX=3702 GN=ABCC4 PE=1 SV=2	Q	Secondary metabolites biosynthesis, transport and catabolism	PREDICTED: LOW QUALITY PROTEIN: ABC transporter C family member 14-like [Prunus mume]
PaF106G0700027901.01	466	389	341	17	40	46	7.12764	7.117	5.37845	0.280709	0.705609	0.693125	6.08301e-37	-3.03521	down	[Q]	Secondary metabolites biosynthesis, transport and catabolism	Molecular Function: oxidoreductase activity (GO:0016491);; Molecular Function: metal ion binding (GO:0046872);;	K13229|1.3e-80|ats:109766943|K13229 2,4-dihydroxy-1,4-benzoxazin-3-one-glucoside dioxygenase [EC:1.14.11.59] | (RefSeq) LOC109766943; DIBOA-glucoside dioxygenase BX6-like	Benzoxazinoid biosynthesis (ko00402)	[QR]	Secondary metabolites biosynthesis, transport and catabolism;; General function prediction only	2OG-Fe(II) oxygenase superfamily	1-aminocyclopropane-1-carboxylate oxidase homolog 4 OS=Arabidopsis thaliana OX=3702 GN=At1g03400 PE=2 SV=1	Q	Secondary metabolites biosynthesis, transport and catabolism	PREDICTED: 1-aminocyclopropane-1-carboxylate oxidase homolog 4-like [Prunus mume]
PaF106G0300011576.01	231	67	199	41	41	43	3.68735	1.24538	3.21526	0.622213	0.709989	0.59155	5.02799e-06	-1.45936	down	[G]	Carbohydrate transport and metabolism	Molecular Function: UDP-glycosyltransferase activity (GO:0008194);; Cellular Component: intracellular membrane-bounded organelle (GO:0043231);;	K23452|1.9e-70|bna:106397643|K23452 UDP-glucosyltransferase 85A [EC:2.4.1.-] | (RefSeq) UDP-glycosyltransferase 85A2 isoform X2	Zeatin biosynthesis (ko00908)	[GC]	Carbohydrate transport and metabolism;; Energy production and conversion	UDP-glucoronosyl and UDP-glucosyl transferase	UDP-glycosyltransferase 83A1 OS=Arabidopsis thaliana OX=3702 GN=UGT83A1 PE=2 SV=1	--	--	PREDICTED: UDP-glycosyltransferase 83A1-like [Prunus mume]
PaF106G0700027591.01	337	292	210	66	90	161	3.94055	4.0793	2.53339	0.832261	1.21977	1.88463	8.48576e-06	-1.16965	down	[IQ]	Lipid transport and metabolism;; Secondary metabolites biosynthesis, transport and catabolism	Molecular Function: CoA-ligase activity (GO:0016405);;	K01904|1.8e-290|pmum:103339831|K01904 4-coumarate--CoA ligase [EC:6.2.1.12] | (RefSeq) 4-coumarate--CoA ligase-like 7	Ubiquinone and other terpenoid-quinone biosynthesis (ko00130);; Phenylpropanoid biosynthesis (ko00940)	[I]	Lipid transport and metabolism	AMP-binding enzyme	4-coumarate--CoA ligase-like 7 OS=Arabidopsis thaliana OX=3702 GN=4CLL7 PE=1 SV=1	I	Lipid transport and metabolism	unnamed protein product [Prunus armeniaca]
PaF106G0200009648.01	234	208	195	809	997	1136	1.45196	1.5449	1.24379	5.46298	7.22417	7.05424	3.82239e-54	2.2021	up	--	--	Molecular Function: ion channel activity (GO:0005216);; Cellular Component: integral component of membrane (GO:0016021);;	K05391|5.0e-271|pper:18787509|K05391 cyclic nucleotide gated channel, plant | (RefSeq) cyclic nucleotide-gated ion channel 1 isoform X1	Plant-pathogen interaction (ko04626)	[PT]	Inorganic ion transport and metabolism;; Signal transduction mechanisms	Cyclic nucleotide-binding domain	Cyclic nucleotide-gated ion channel 1 OS=Arabidopsis thaliana OX=3702 GN=CNGC1 PE=1 SV=1	U	Intracellular trafficking, secretion, and vesicular transport	uncharacterized protein LOC110761081 isoform X1 [Prunus avium]
PaF106G0200007143.01	5	11	3	56	74	79	0.019356	0.059876	0.013425	0.286632	0.404472	0.373852	1.21015e-10	2.2912	up	[R]	General function prediction only	Biological Process: defense response (GO:0006952);; Molecular Function: ADP binding (GO:0043531);;	K12818|4.1e-158|mtr:MTR_0267s0070|K12818 ATP-dependent RNA helicase DHX8/PRP22 [EC:3.6.4.13] | (RefSeq) NB-ARC domain disease resistance protein, putative	Spliceosome (ko03040)	[T]	Signal transduction mechanisms	NB-ARC domain	Putative disease resistance RPP13-like protein 1 OS=Arabidopsis thaliana OX=3702 GN=RPPL1 PE=3 SV=1	T	Signal transduction mechanisms	PREDICTED: putative disease resistance RPP13-like protein 1 [Prunus mume]
PaF106G0300012745.01	655	595	520	104	93	125	11.1167	12.0707	9.09839	1.90813	1.83047	2.11555	2.1157e-42	-2.25236	down	--	--	Molecular Function: nucleic acid binding (GO:0003676);; Molecular Function: aspartic-type endopeptidase activity (GO:0004190);; Biological Process: DNA integration (GO:0015074);;	K12349|2.2e-102|ccaj:109806181|K12349 neutral ceramidase [EC:3.5.1.23] | (RefSeq) neutral ceramidase-like	Sphingolipid metabolism (ko00600)	[R]	General function prediction only	Integrase zinc binding domain	--	L	Replication, recombination and repair	transposable element gene [Prunus dulcis]
PaF106G0200009897.01	297	239	245	46	18	74	4.44786	4.29868	3.7758	0.751353	0.302818	1.10347	3.28255e-13	-2.04094	down	[G]	Carbohydrate transport and metabolism	Molecular Function: UDP-glycosyltransferase activity (GO:0008194);;	K13493|2.2e-113|bna:106432180|K13493 cytokinin-N-glucosyltransferase [EC:2.4.1.-] | (RefSeq) UDP-glycosyltransferase 76C2	Zeatin biosynthesis (ko00908)	[GC]	Carbohydrate transport and metabolism;; Energy production and conversion	UDP-glucoronosyl and UDP-glucosyl transferase	UDP-glycosyltransferase 76F1 OS=Arabidopsis thaliana OX=3702 GN=UGT76F1 PE=2 SV=1	--	--	PREDICTED: UDP-glycosyltransferase 76F1-like [Prunus mume]
PaF106G0600024645.01	50	29	37	113	105	96	1.10903	0.816714	0.871039	2.8557	3.05355	2.13474	6.93987e-06	1.29366	up	[Q]	Secondary metabolites biosynthesis, transport and catabolism	Molecular Function: oxidoreductase activity (GO:0016491);;	K00002|4.2e-181|pper:18773883|K00002 alcohol dehydrogenase (NADP+) [EC:1.1.1.2] | (RefSeq) aldo-keto reductase family 4 member C9	Glycolysis / Gluconeogenesis (ko00010);; Pentose and glucuronate interconversions (ko00040);; Glycerolipid metabolism (ko00561)	[R]	General function prediction only	Aldo/keto reductase family	NADPH-dependent aldo-keto reductase, chloroplastic OS=Arabidopsis thaliana OX=3702 GN=AKR4C9 PE=1 SV=1	L	Replication, recombination and repair	unnamed protein product [Prunus armeniaca]
PaF106G0800030242.01	27	18	41	156	120	143	2.00941	1.56998	3.35042	12.8088	10.6836	11.4729	5.56401e-12	1.96859	up	[C]	Energy production and conversion	Molecular Function: FMN binding (GO:0010181);; Molecular Function: oxidoreductase activity (GO:0016491);;	K05894|2.8e-37|pavi:110750737|K05894 12-oxophytodienoic acid reductase [EC:1.3.1.42] | (RefSeq) 12-oxophytodienoate reductase 1-like	alpha-Linolenic acid metabolism (ko00592)	[CR]	Energy production and conversion;; General function prediction only	NADH:flavin oxidoreductase / NADH oxidase family	12-oxophytodienoate reductase 2 OS=Arabidopsis thaliana OX=3702 GN=OPR2 PE=1 SV=2	C	Energy production and conversion	PREDICTED: putative 12-oxophytodienoate reductase 11 [Prunus mume]
PaF106G0400017668.01	1579	1203	1305	3311	2985	3522	24.5047	22.3461	20.8463	55.8722	54.9993	54.818	1.17338e-53	1.33783	up	[C]	Energy production and conversion	Biological Process: lipid metabolic process (GO:0006629);; Cellular Component: integral component of membrane (GO:0016021);; Molecular Function: lipase activity (GO:0016298);;	K00026|3.1e-41|pmum:103324868|K00026 malate dehydrogenase [EC:1.1.1.37] | (RefSeq) malate dehydrogenase, mitochondrial-like	Citrate cycle (TCA cycle) (ko00020);; Cysteine and methionine metabolism (ko00270);; Pyruvate metabolism (ko00620);; Glyoxylate and dicarboxylate metabolism (ko00630);; Carbon fixation in photosynthetic organisms (ko00710);; Carbon metabolism (ko01200)	--	--	GDSL-like Lipase/Acylhydrolase	GDSL esterase/lipase At1g31550 OS=Arabidopsis thaliana OX=3702 GN=At1g31550 PE=2 SV=1	C	Energy production and conversion	PREDICTED: GDSL esterase/lipase At1g31550-like [Prunus mume]
PaF106G0400018178.01	363	166	166	899	754	832	3.85777	2.1031	1.82164	10.4087	9.36461	8.86282	2.30026e-17	1.787	up	--	--	Biological Process: cellulose microfibril organization (GO:0010215);; Cellular Component: anchored component of membrane (GO:0031225);;	K10956|4.3e-21|obr:102718200|K10956 protein transport protein SEC61 subunit alpha | (RefSeq) preprotein translocase subunit SECY, chloroplastic	Protein export (ko03060);; Protein processing in endoplasmic reticulum (ko04141);; Phagosome (ko04145)	--	--	COBRA-like protein	COBRA-like protein 7 OS=Arabidopsis thaliana OX=3702 GN=COBL7 PE=2 SV=2	S	Function unknown	unnamed protein product [Prunus armeniaca]
PaF106G0800029962.01	510	326	534	188	172	201	11.6925	8.94578	12.6309	4.67366	4.60358	4.6118	7.5234e-10	-1.11734	down	[R]	General function prediction only	Molecular Function: acid phosphatase activity (GO:0003993);;	K20728|2.5e-43|thj:104814965|K20728 vegetative storage protein 2 | (RefSeq) vegetative storage protein 2-like	MAPK signaling pathway - plant (ko04016)	--	--	HAD superfamily, subfamily IIIB (Acid phosphatase)	Acid phosphatase 1 OS=Solanum lycopersicum OX=4081 GN=APS1 PE=2 SV=1	S	Function unknown	PREDICTED: acid phosphatase 1-like isoform X2 [Prunus mume]
PaF106G0100006404.01	901	631	785	1918	1371	1980	11.4602	9.60588	10.3096	26.5771	20.3693	25.229	1.48391e-22	1.23754	up	--	--	Molecular Function: UDP-glycosyltransferase activity (GO:0008194);; Cellular Component: intracellular membrane-bounded organelle (GO:0043231);;	K22845|3.8e-263|pmum:103319270|K22845 phlorizin synthase [EC:2.4.1.357] | (RefSeq) UDP-glycosyltransferase 88F3-like	Flavonoid biosynthesis (ko00941)	[GC]	Carbohydrate transport and metabolism;; Energy production and conversion	UDP-glucoronosyl and UDP-glucosyl transferase	UDP-glycosyltransferase 88F3 OS=Pyrus communis OX=23211 GN=UGT88F3 PE=2 SV=1	--	--	unnamed protein product [Prunus armeniaca]
PaF106G0800029503.01	96	56	63	265	328	454	1.47798	1.00138	1.00832	4.51968	6.05664	7.12032	7.63259e-23	2.14521	up	[P]	Inorganic ion transport and metabolism	Molecular Function: oxidoreductase activity (GO:0016491);; Molecular Function: flavin adenine dinucleotide binding (GO:0050660);; Molecular Function: NADP binding (GO:0050661);;	K11816|2.1e-186|pmum:103333856|K11816 indole-3-pyruvate monooxygenase [EC:1.14.13.168] | (RefSeq) probable indole-3-pyruvate monooxygenase YUCCA10	Tryptophan metabolism (ko00380)	[Q]	Secondary metabolites biosynthesis, transport and catabolism	Pyridine nucleotide-disulphide oxidoreductase	Probable indole-3-pyruvate monooxygenase YUCCA10 OS=Arabidopsis thaliana OX=3702 GN=YUC10 PE=2 SV=1	Q	Secondary metabolites biosynthesis, transport and catabolism	hypothetical protein PRUPE_8G252500 [Prunus persica]
PaF106G0800030640.01	375	404	345	39	105	93	4.51149	5.81816	4.2824	0.50972	1.47516	1.11081	5.6944e-13	-1.87038	down	--	--	Biological Process: amino acid transmembrane transport (GO:0003333);; Cellular Component: plasma membrane (GO:0005886);; Molecular Function: amino acid transmembrane transporter activity (GO:0015171);; Cellular Component: integral component of membrane (GO:0016021);;	K13946|1.0e-287|pmum:103334805|K13946 auxin influx carrier (AUX1 LAX family) | (RefSeq) auxin transporter-like protein 2	Plant hormone signal transduction (ko04075)	[E]	Amino acid transport and metabolism	Transmembrane amino acid transporter protein	Auxin transporter-like protein 2 OS=Arabidopsis thaliana OX=3702 GN=LAX2 PE=2 SV=1	E	Amino acid transport and metabolism	unnamed protein product [Prunus armeniaca]
PaF106G0100006050.01	36	17	15	57	43	69	0.51486	0.287994	0.221513	0.903274	0.732669	1.00954	0.0045555	1.02154	up	--	--	Cellular Component: integral component of membrane (GO:0016021);;	K23612|1.4e-12|han:110887064|K23612 neural Wiskott-Aldrich syndrome protein | (RefSeq) basic proline-rich protein-like	Endocytosis (ko04144)	--	--	--	--	--	--	unnamed protein product [Prunus armeniaca]
PaF106G0400017887.01	273	305	413	84	138	134	2.95131	3.94641	4.61012	0.982278	1.73705	1.45161	1.17759e-07	-1.24934	down	--	--	Molecular Function: catechol oxidase activity (GO:0004097);; Biological Process: pigment biosynthetic process (GO:0046148);; Molecular Function: metal ion binding (GO:0046872);;	K00422|0.0e+00|pper:18781346|K00422 polyphenol oxidase [EC:1.10.3.1] | (RefSeq) polyphenol oxidase, chloroplastic	Tyrosine metabolism (ko00350);; Isoquinoline alkaloid biosynthesis (ko00950)	--	--	Protein of unknown function (DUF_B2219)	Polyphenol oxidase, chloroplastic OS=Malus domestica OX=3750 PE=1 SV=1	S	Function unknown	unnamed protein product [Prunus armeniaca]
PaF106G0300013244.01	851	571	550	95	83	155	15.7541	12.6106	10.4304	1.90095	1.89953	3.03983	1.39439e-32	-2.30328	down	[K]	Transcription	Molecular Function: O-methyltransferase activity (GO:0008171);; Biological Process: methylation (GO:0032259);; Molecular Function: protein dimerization activity (GO:0046983);;	K16040|1.6e-194|pmum:103328492|K16040 trans-resveratrol di-O-methyltransferase [EC:2.1.1.240] | (RefSeq) trans-resveratrol di-O-methyltransferase-like	Stilbenoid, diarylheptanoid and gingerol biosynthesis (ko00945)	[R]	General function prediction only	O-methyltransferase domain	Probable O-methyltransferase 3 OS=Humulus lupulus OX=3486 GN=OMT3 PE=2 SV=1	S	Function unknown	unnamed protein product [Prunus armeniaca]
PaF106G0300012306.01	168	130	117	52	29	52	2.40437	2.21768	1.72499	0.810251	0.477924	0.742703	1.66263e-06	-1.32511	down	--	--	Molecular Function: UDP-glycosyltransferase activity (GO:0008194);; Cellular Component: intracellular membrane-bounded organelle (GO:0043231);; Molecular Function: quercetin 3-O-glucosyltransferase activity (GO:0080043);; Molecular Function: quercetin 7-O-glucosyltransferase activity (GO:0080044);;	K22706|5.0e-170|pper:18788923|K22706 (R)-mandelonitrile beta-glucosyltransferase [EC:2.4.1.354] | (RefSeq) 7-deoxyloganetin glucosyltransferase	Cyanoamino acid metabolism (ko00460)	[GC]	Carbohydrate transport and metabolism;; Energy production and conversion	UDP-glucoronosyl and UDP-glucosyl transferase	7-deoxyloganetin glucosyltransferase OS=Gardenia jasminoides OX=114476 GN=UGT85A24 PE=1 SV=1	--	--	PREDICTED: 7-deoxyloganetin glucosyltransferase-like [Prunus mume]
PaF106G0400017010.01	24	14	25	795	893	966	0.164721	0.115022	0.174741	17.0254	20.7838	17.8584	1.68669e-144	5.02054	up	--	--	--	K07456|1.1e-22|pavi:110766748|K07456 DNA mismatch repair protein MutS2 | (RefSeq) uncharacterized protein LOC110766748	Mismatch repair (ko03430)	--	--	Domain of unknown function (DUF2828)	--	S	Function unknown	PREDICTED: uncharacterized protein LOC103325596 [Prunus mume]
PaF106G0400017245.01	301	252	259	81	98	133	2.67225	2.67893	2.36961	0.783559	1.01205	1.18138	3.26014e-09	-1.20204	down	[R]	General function prediction only	Biological Process: reproduction (GO:0000003);; Biological Process: nuclear division (GO:0000280);; Biological Process: developmental process involved in reproduction (GO:0003006);; Molecular Function: protein binding (GO:0005515);; Cellular Component: cellular_component (GO:0005575);; Cellular Component: intracellular (GO:0005622);; Cellular Component: cell (GO:0005623);; Cellular Component: nuc…	K14152|3.8e-124|cpep:111783531|K14152 phosphoribosyl-ATP pyrophosphohydrolase / phosphoribosyl-AMP cyclohydrolase / histidinol dehydrogenase [EC:3.6.1.31 3.5.4.19 1.1.1.23] | (RefSeq) uncharacterized protein LOC111783531	Histidine metabolism (ko00340);; Biosynthesis of amino acids (ko01230)	--	--	Tetratricopeptide repeat	Protein POLLENLESS 3 OS=Arabidopsis thaliana OX=3702 GN=MS5 PE=2 SV=2	S	Function unknown	unnamed protein product [Prunus armeniaca]
PaF106G0400015069.01	3	0	5	71	62	49	0.035244	0	0.079984	1.34538	1.27482	0.861879	2.17601e-12	2.58226	up	[G]	Carbohydrate transport and metabolism	Molecular Function: polygalacturonase activity (GO:0004650);; Cellular Component: extracellular region (GO:0005576);; Biological Process: carbohydrate metabolic process (GO:0005975);; Biological Process: cell wall organization (GO:0071555);;	K01184|1.0e-221|pmum:103326925|K01184 polygalacturonase [EC:3.2.1.15] | (RefSeq) polygalacturonase-like	Pentose and glucuronate interconversions (ko00040)	--	--	Glycosyl hydrolases family 28	Polygalacturonase OS=Prunus persica OX=3760 PE=2 SV=1	G	Carbohydrate transport and metabolism	unnamed protein product [Prunus armeniaca]
PaF106G0700028053.01	3910	3149	3822	6672	6073	8066	35.9252	33.5066	36.2093	65.1422	64.0998	72.9642	8.93473e-41	1.00946	up	[V]	Defense mechanisms	Molecular Function: ATP binding (GO:0005524);; Cellular Component: integral component of membrane (GO:0016021);; Molecular Function: ATPase activity (GO:0016887);;	K05681|5.6e-160|nsy:104217879|K05681 ATP-binding cassette, subfamily G (WHITE), member 2 | (RefSeq) ABC transporter G family member 9-like	ABC transporters (ko02010)	[Q]	Secondary metabolites biosynthesis, transport and catabolism	ABC-2 type transporter	ABC transporter G family member 22 OS=Arabidopsis thaliana OX=3702 GN=ABCG22 PE=1 SV=1	Q	Secondary metabolites biosynthesis, transport and catabolism	unnamed protein product [Prunus armeniaca]
PaF106G0700028845.01	9939	7522	8887	3789	3501	4799	109.52	99.1875	101.016	45.4392	45.0311	52.9449	1.52337e-37	-1.02645	down	--	--	Molecular Function: GTPase activity (GO:0003924);; Molecular Function: structural constituent of cytoskeleton (GO:0005200);; Molecular Function: GTP binding (GO:0005525);; Cellular Component: cytoplasm (GO:0005737);; Cellular Component: microtubule (GO:0005874);; Biological Process: microtubule-based process (GO:0007017);;	K07375|3.2e-264|pavi:110770194|K07375 tubulin beta | (RefSeq) tubulin beta-5 chain	Phagosome (ko04145)	[Z]	Cytoskeleton	Tubulin/FtsZ family, GTPase domain	Tubulin beta-4 chain OS=Eleusine indica OX=29674 GN=TUBB4 PE=2 SV=1	Z	Cytoskeleton	unnamed protein product [Prunus armeniaca]
PaF106G0200007243.01	793	729	812	170	189	203	3.7892	4.16955	4.0017	0.881362	1.05218	0.970735	4.2182e-44	-1.89805	down	[R]	General function prediction only	Molecular Function: ADP binding (GO:0043531);;	K12818|2.3e-160|mtr:MTR_0267s0070|K12818 ATP-dependent RNA helicase DHX8/PRP22 [EC:3.6.4.13] | (RefSeq) NB-ARC domain disease resistance protein, putative	Spliceosome (ko03040)	[T]	Signal transduction mechanisms	NB-ARC domain	Putative disease resistance RPP13-like protein 1 OS=Arabidopsis thaliana OX=3702 GN=RPPL1 PE=3 SV=1	T	Signal transduction mechanisms	putative disease resistance RPP13-like protein 1 isoform X2 [Prunus dulcis]
PaF106G0600022183.01	915	825	949	1717	1645	1874	13.924	15.0028	14.979	28.627	28.9603	28.4682	8.02729e-28	1.03186	up	--	--	Molecular Function: protein serine/threonine phosphatase activity (GO:0004722);; Molecular Function: metal ion binding (GO:0046872);;	K14497|4.3e-88|pmum:103321870|K14497 protein phosphatase 2C [EC:3.1.3.16] | (RefSeq) probable protein phosphatase 2C 24	MAPK signaling pathway - plant (ko04016);; Plant hormone signal transduction (ko04075)	[T]	Signal transduction mechanisms	Protein phosphatase 2C	Protein phosphatase 2C 3 OS=Arabidopsis thaliana OX=3702 GN=AIP1 PE=1 SV=1	T	Signal transduction mechanisms	unnamed protein product [Prunus armeniaca]
PaF106G0100002793.01	1	0	0	188	114	167	0.007467	0	0	3.78598	2.45655	3.09428	1.04986e-39	4.41827	up	--	--	--	K03097|4.1e-15|hbr:110638242|K03097 casein kinase II subunit alpha [EC:2.7.11.1] | (RefSeq) casein kinase II subunit alpha-4, chloroplastic-like	Ribosome biogenesis in eukaryotes (ko03008);; Circadian rhythm - plant (ko04712)	--	--	gag-polypeptide of LTR copia-type	--	S	Function unknown	PREDICTED: uncharacterized protein LOC103322584 [Prunus mume]
PaF106G0400016118.01	135	137	114	35	43	53	0.657817	0.802147	0.572061	0.186539	0.246171	0.257485	2.45562e-06	-1.27366	down	--		Molecular Function: protein kinase activity (GO:0004672);; Molecular Function: ATP binding (GO:0005524);; Molecular Function: carbohydrate binding (GO:0030246);;	K22133|1.4e-73|egr:104443803|K22133 oxalate---CoA ligase [EC:6.2.1.8] | (RefSeq) oxalate--CoA ligase isoform X2	Glyoxylate and dicarboxylate metabolism (ko00630)	--	--	Protein kinase domain	L-type lectin-domain containing receptor kinase IX.1 OS=Arabidopsis thaliana OX=3702 GN=LECRK91 PE=1 SV=1	T	Signal transduction mechanisms	L-type lectin-domain containing receptor kinase IX.1-like [Prunus yedoensis var. nudiflora]
PaF106G0300011745.01	70	49	48	8	10	23	1.32405	1.10242	0.921964	0.157317	0.205374	0.433928	0.00024602	-1.34059	down	[M]	Cell wall/membrane/envelope biogenesis	Molecular Function: 3-beta-hydroxy-delta5-steroid dehydrogenase activity (GO:0003854);; Biological Process: steroid biosynthetic process (GO:0006694);;	K09753|1.1e-35|ppp:112293893|K09753 cinnamoyl-CoA reductase [EC:1.2.1.44] | (RefSeq) cinnamoyl-CoA reductase 1-like	Phenylpropanoid biosynthesis (ko00940)	[V]	Defense mechanisms	3-beta hydroxysteroid dehydrogenase/isomerase family	Cinnamoyl-CoA reductase-like SNL6 OS=Oryza sativa subsp. japonica OX=39947 GN=SNL6 PE=3 SV=1	V	Defense mechanisms	PREDICTED: dihydroflavonol-4-reductase-like [Prunus mume]
PaF106G0100005494.01	25	10	20	138	186	107	0.175805	0.079897	0.145998	1.08608	1.57655	0.776094	1.38949e-14	2.40025	up	[G]	Carbohydrate transport and metabolism	Molecular Function: pectate lyase activity (GO:0030570);; Biological Process: pectin catabolic process (GO:0045490);; Molecular Function: metal ion binding (GO:0046872);;	K01728|5.6e-80|pavi:110764871|K01728 pectate lyase [EC:4.2.2.2] | (RefSeq) probable pectate lyase 4	Pentose and glucuronate interconversions (ko00040)	--	--	Pectate lyase	Pectate lyase 1 OS=Hesperocyparis arizonica OX=49011 PE=1 SV=2	G	Carbohydrate transport and metabolism	probable pectate lyase 4 [Prunus avium]
PaF106G0700028092.01	148	93	89	287	230	262	1.93865	1.46206	1.21766	4.13667	3.55275	3.467	2.2886e-08	1.22208	up	[R]	General function prediction only	Molecular Function: anaphase-promoting complex binding (GO:0010997);; Biological Process: cell division (GO:0051301);; Molecular Function: ubiquitin-protein transferase activator activity (GO:0097027);; Biological Process: positive regulation of ubiquitin protein ligase activity (GO:1904668);;	K03363|1.8e-259|pavi:110748657|K03363 cell division cycle 20, cofactor of APC complex | (RefSeq) cell division cycle 20.1, cofactor of APC complex-like	Ubiquitin mediated proteolysis (ko04120)	[DO]	Cell cycle control, cell division, chromosome partitioning;; Posttranslational modification, protein turnover, chaperones	WD domain, G-beta repeat	Cell division cycle 20.1, cofactor of APC complex OS=Arabidopsis thaliana OX=3702 GN=CDC20-1 PE=1 SV=1	--	--	unnamed protein product [Prunus armeniaca]
PaF106G0800031494.01	2395	909	1174	484	615	480	18.6444	8.46136	9.42759	4.09764	5.58676	3.74088	0.00216418	-1.04361	down	[M]	Cell wall/membrane/envelope biogenesis	Molecular Function: protein kinase activity (GO:0004672);; Molecular Function: ATP binding (GO:0005524);; Cellular Component: plasma membrane (GO:0005886);; Cellular Component: plasmodesma (GO:0009506);; Cellular Component: integral component of membrane (GO:0016021);; Biological Process: protein autophosphorylation (GO:0046777);;	K13435|8.0e-97|spen:107018783|K13435 serine/threonine-protein kinase Pto | (RefSeq) receptor-like protein kinase HERK 1 isoform X2	Plant-pathogen interaction (ko04626)	[T]	Signal transduction mechanisms	Protein tyrosine and serine/threonine kinase	Probable receptor-like protein kinase At2g21480 OS=Arabidopsis thaliana OX=3702 GN=At2g21480 PE=3 SV=1	T	Signal transduction mechanisms	PREDICTED: probable receptor-like protein kinase At2g21480 [Prunus mume]
PaF106G0800032651.01	122	128	170	364	383	437	0.696433	0.871484	0.999608	2.26117	2.55416	2.49744	6.27433e-16	1.47866	up	[K]	Transcription	Biological Process: signal transduction (GO:0007165);; Molecular Function: ADP binding (GO:0043531);;	K00695|2.6e-119|mtr:MTR_6g478030|K00695 sucrose synthase [EC:2.4.1.13] | (RefSeq) sucrose synthase	Starch and sucrose metabolism (ko00500)	--	--	TIR domain	TMV resistance protein N OS=Nicotiana glutinosa OX=35889 GN=N PE=1 SV=1	S	Function unknown	PREDICTED: TMV resistance protein N-like [Prunus mume]
PaF106G0800031015.01	0	0	0	64	69	94	0	0	0	1.48162	1.70017	2.00029	1.4668e-22	3.51746	up	--	--	Molecular Function: UDP-glycosyltransferase activity (GO:0008194);; Cellular Component: intracellular membrane-bounded organelle (GO:0043231);;	K23260|1.1e-149|pavi:110765167|K23260 scopoletin glucosyltransferase [EC:2.4.1.128] | (RefSeq) UDP-glucose flavonoid 3-O-glucosyltransferase 7-like	Phenylpropanoid biosynthesis (ko00940)	[GC]	Carbohydrate transport and metabolism;; Energy production and conversion	--	UDP-glucose flavonoid 3-O-glucosyltransferase 7 OS=Fragaria ananassa OX=3747 GN=GT7 PE=1 SV=1	--	--	UDP-glucose flavonoid 3-O-glucosyltransferase 7-like [Prunus avium]
PaF106G0300012156.01	209	133	166	6	19	19	5.52118	4.18468	4.5179	0.14804	0.557596	0.4858	3.0518e-20	-2.72868	down	--	--	Molecular Function: polygalacturonase activity (GO:0004650);; Cellular Component: cellular_component (GO:0005575);; Cellular Component: extracellular region (GO:0005576);; Cellular Component: cell wall (GO:0005618);; Cellular Component: cell (GO:0005623);; Biological Process: carbohydrate metabolic process (GO:0005975);; Cellular Component: external encapsulating structure (GO:0030312);; Cellular…	K01213|6.2e-50|pper:109947835|K01213 galacturan 1,4-alpha-galacturonidase [EC:3.2.1.67] | (RefSeq) exopolygalacturonase-like	Pentose and glucuronate interconversions (ko00040)	--	--	Glycosyl hydrolases family 28	Exopolygalacturonase (Fragment) OS=Oenothera organensis OX=3945 PE=2 SV=1	G	Carbohydrate transport and metabolism	exopolygalacturonase-like [Prunus persica]
PaF106G0800030124.01	248	110	108	27	54	35	3.35899	1.86039	1.51069	0.44478	0.883713	0.473179	6.14668e-06	-1.45817	down	[T]	Signal transduction mechanisms	Molecular Function: protein serine/threonine kinase activity (GO:0004674);; Molecular Function: ATP binding (GO:0005524);;	K13430|2.4e-134|pda:103708100|K13430 serine/threonine-protein kinase PBS1 [EC:2.7.11.1] | (RefSeq) serine/threonine-protein kinase PBS1-like	Plant-pathogen interaction (ko04626)	[T]	Signal transduction mechanisms	Protein kinase domain	Probable serine/threonine-protein kinase PBL26 OS=Arabidopsis thaliana OX=3702 GN=PBL26 PE=2 SV=1	T	Signal transduction mechanisms	unnamed protein product [Prunus armeniaca]
PaF106G0800032547.01	24	24	24	397	338	483	0.140792	0.172319	0.149912	2.61563	2.3922	2.93263	1.32443e-68	3.746	up	[R]	General function prediction only	Biological Process: signal transduction (GO:0007165);; Molecular Function: ADP binding (GO:0043531);;	K00695|1.8e-113|mtr:MTR_6g478030|K00695 sucrose synthase [EC:2.4.1.13] | (RefSeq) sucrose synthase	Starch and sucrose metabolism (ko00500)	--	--	TIR domain	Disease resistance protein RUN1 OS=Vitis rotundifolia OX=103349 GN=RUN1 PE=1 SV=1	S	Function unknown	hypothetical protein PRUPE_8G056700 [Prunus persica]
PaF106G0100000566.01	246	191	156	520	518	607	1.8332	1.70246	1.19227	4.21191	4.50089	4.52241	2.88985e-19	1.4817	up	[K]	Transcription	Biological Process: defense response (GO:0006952);; Molecular Function: ADP binding (GO:0043531);;	K13457|6.4e-105|qsu:112007111|K13457 disease resistance protein RPM1 | (RefSeq) disease resistance protein RPM1-like	Plant-pathogen interaction (ko04626)	[T]	Signal transduction mechanisms	NB-ARC domain	Putative disease resistance protein At1g50180 OS=Arabidopsis thaliana OX=3702 GN=At1g50180 PE=3 SV=2	T	Signal transduction mechanisms	PREDICTED: putative disease resistance protein At1g50180 isoform X1 [Prunus mume]
PaF106G0100004578.01	308	263	293	92	143	103	6.18728	6.30405	6.06368	2.00081	3.33877	2.06377	3.19728e-07	-1.13697	down	--	--	Molecular Function: transcription regulatory region sequence-specific DNA binding (GO:0000976);; Cellular Component: nucleus (GO:0005634);; Biological Process: regulation of transcription, DNA-templated (GO:0006355);;	K14491|1.6e-07|han:110883863|K14491 two-component response regulator ARR-B family | (RefSeq) two-component response regulator ARR1-like isoform X1	Plant hormone signal transduction (ko04075)	--	--	Myb-like DNA-binding domain	Probable transcription factor KAN4 OS=Arabidopsis thaliana OX=3702 GN=KAN4 PE=1 SV=1	K	Transcription	unnamed protein product [Prunus armeniaca]
PaF106G0400017886.01	459	445	586	132	232	201	4.95551	5.74643	6.52582	1.55203	2.92354	2.17099	1.46812e-08	-1.19954	down	--	--	Molecular Function: catechol oxidase activity (GO:0004097);; Biological Process: pigment biosynthetic process (GO:0046148);; Molecular Function: metal ion binding (GO:0046872);;	K00422|0.0e+00|pmum:103324678|K00422 polyphenol oxidase [EC:1.10.3.1] | (RefSeq) polyphenol oxidase, chloroplastic-like	Tyrosine metabolism (ko00350);; Isoquinoline alkaloid biosynthesis (ko00950)	--	--	Protein of unknown function (DUF_B2219)	Polyphenol oxidase latent form, chloroplastic OS=Prunus armeniaca OX=36596 GN=PPO PE=1 SV=1	S	Function unknown	unnamed protein product [Prunus armeniaca]
PaF106G0200006845.01	10874	9920	11150	996	1144	2110	81.7115	86.7786	83.9818	8.15415	12.1085	16.1029	3.71219e-24	-2.49726	down	--	--	Molecular Function: oxidoreductase activity, acting on single donors with incorporation of molecular oxygen, incorporation of two atoms of oxygen (GO:0016702);; Biological Process: oxylipin biosynthetic process (GO:0031408);; Biological Process: lipid oxidation (GO:0034440);; Molecular Function: metal ion binding (GO:0046872);;	K00454|0.0e+00|pper:18787524|K00454 lipoxygenase [EC:1.13.11.12] | (RefSeq) linoleate 13S-lipoxygenase 2-1, chloroplastic	Linoleic acid metabolism (ko00591);; alpha-Linolenic acid metabolism (ko00592)	--	--	Lipoxygenase	Linoleate 13S-lipoxygenase 2-1, chloroplastic OS=Solanum tuberosum OX=4113 GN=LOX2.1 PE=1 SV=1	E	Amino acid transport and metabolism	linoleate 13S-lipoxygenase 2-1, chloroplastic [Prunus persica]
PaF106G0700029083.01	0	0	0	52	57	48	0	0	0	1.50299	1.75651	1.26385	1.21786e-15	2.98036	up	[I]	Lipid transport and metabolism	Molecular Function: 3-hydroxyisobutyryl-CoA hydrolase activity (GO:0003860);;	K05605|5.3e-41|pmum:103328923|K05605 3-hydroxyisobutyryl-CoA hydrolase [EC:3.1.2.4] | (RefSeq) 3-hydroxyisobutyryl-CoA hydrolase-like protein 5	Valine, leucine and isoleucine degradation (ko00280);; beta-Alanine metabolism (ko00410);; Propanoate metabolism (ko00640);; Carbon metabolism (ko01200)	--	--	Enoyl-CoA hydratase/isomerase	3-hydroxyisobutyryl-CoA hydrolase-like protein 5 OS=Arabidopsis thaliana OX=3702 GN=At1g06550 PE=1 SV=2	I	Lipid transport and metabolism	unnamed protein product [Prunus armeniaca]
PaF106G0100006312.01	92	81	49	0	4	2	1.12146	1.16957	0.61174	0	0.051507	0.01259	2.66654e-14	-2.77975	down	--	--	Molecular Function: UDP-glycosyltransferase activity (GO:0008194);; Cellular Component: intracellular membrane-bounded organelle (GO:0043231);;	K22845|3.9e-167|pper:18789761|K22845 phlorizin synthase [EC:2.4.1.357] | (RefSeq) UDP-glycosyltransferase 88F5	Flavonoid biosynthesis (ko00941)	[GC]	Carbohydrate transport and metabolism;; Energy production and conversion	--	UDP-glycosyltransferase 88F5 OS=Malus domestica OX=3750 GN=UGT88F5 PE=2 SV=1	--	--	unnamed protein product [Prunus armeniaca]
PaF106G0100006439.01	104	115	148	270	296	293	0.491349	0.646705	0.72255	1.39054	1.63703	1.38748	5.26231e-09	1.20993	up	[R]	General function prediction only	Biological Process: signal transduction (GO:0007165);; Molecular Function: ADP binding (GO:0043531);;	K00695|4.7e-93|mtr:MTR_6g478030|K00695 sucrose synthase [EC:2.4.1.13] | (RefSeq) sucrose synthase	Starch and sucrose metabolism (ko00500)	--	--	NB-ARC domain	TMV resistance protein N OS=Nicotiana glutinosa OX=35889 GN=N PE=1 SV=1	T	Signal transduction mechanisms	TMV resistance protein N isoform X7 [Prunus persica]
PaF106G0200007393.01	158	138	188	323	299	399	0.798343	0.830144	0.979384	1.77537	1.76424	2.0181	6.12298e-10	1.09355	up	[R]	General function prediction only	Molecular Function: ADP binding (GO:0043531);;	K12818|1.7e-199|mtr:MTR_0267s0070|K12818 ATP-dependent RNA helicase DHX8/PRP22 [EC:3.6.4.13] | (RefSeq) NB-ARC domain disease resistance protein, putative	Spliceosome (ko03040)	[T]	Signal transduction mechanisms	NB-ARC domain	Putative disease resistance RPP13-like protein 1 OS=Arabidopsis thaliana OX=3702 GN=RPPL1 PE=3 SV=1	T	Signal transduction mechanisms	PREDICTED: LOW QUALITY PROTEIN: putative disease resistance RPP13-like protein 1 [Prunus mume]
PaF106G0700026042.01	2645	1932	2509	769	673	770	24.1842	21.1075	23.4892	7.64581	7.36401	7.05926	1.8546e-50	-1.55099	down	[T]	Signal transduction mechanisms	Molecular Function: protein serine/threonine kinase activity (GO:0004674);; Molecular Function: ATP binding (GO:0005524);; Cellular Component: plasma membrane (GO:0005886);; Biological Process: carbohydrate metabolic process (GO:0005975);; Biological Process: protein phosphorylation (GO:0006468);; Molecular Function: chitin binding (GO:0008061);; Cellular Component: integral component of membrane…	K01183|1.9e-83|nsy:104241083|K01183 chitinase [EC:3.2.1.14] | (RefSeq) chitinase-3-like protein 2	Amino sugar and nucleotide sugar metabolism (ko00520)	--	--	Protein tyrosine and serine/threonine kinase	G-type lectin S-receptor-like serine/threonine-protein kinase At1g11330 OS=Arabidopsis thaliana OX=3702 GN=At1g11330 PE=1 SV=3	T	Signal transduction mechanisms	PREDICTED: cysteine-rich receptor-like protein kinase 5 isoform X1 [Prunus mume]
PaF106G0200009640.01	19	17	22	63	48	102	0.53959	0.577924	0.648706	2.00062	1.63429	2.99072	1.40658e-05	1.45731	up	--	--	Cellular Component: integral component of membrane (GO:0016021);;	K05391|8.7e-29|pmum:103332440|K05391 cyclic nucleotide gated channel, plant | (RefSeq) cyclic nucleotide-gated ion channel 1-like isoform X1	Plant-pathogen interaction (ko04626)	[PT]	Inorganic ion transport and metabolism;; Signal transduction mechanisms	--	Cyclic nucleotide-gated ion channel 1 OS=Arabidopsis thaliana OX=3702 GN=CNGC1 PE=1 SV=1	--	--	cyclic nucleotide gated channel 1, partial [Prunus dulcis]
PaF106G0200008741.01	22	22	6	54	39	79	0.252332	0.295993	0.066447	0.676948	0.52136	0.904613	0.00132404	1.21148	up	[QV]	Secondary metabolites biosynthesis, transport and catabolism;; Defense mechanisms	Molecular Function: monooxygenase activity (GO:0004497);; Molecular Function: iron ion binding (GO:0005506);; Cellular Component: integral component of membrane (GO:0016021);; Molecular Function: oxidoreductase activity, acting on paired donors, with incorporation or reduction of molecular oxygen (GO:0016705);; Molecular Function: heme binding (GO:0020037);;	K20495|5.8e-90|ppp:112291140|K20495 long-chain fatty acid omega-monooxygenase [EC:1.14.14.80] | (RefSeq) cytochrome P450 704B1-like	Fatty acid degradation (ko00071);; Cutin, suberine and wax biosynthesis (ko00073)	[QI]	Secondary metabolites biosynthesis, transport and catabolism;; Lipid transport and metabolism	Cytochrome P450	Cytochrome P450 704C1 OS=Pinus taeda OX=3352 GN=CYP704C1 PE=2 SV=1	Q	Secondary metabolites biosynthesis, transport and catabolism	unnamed protein product [Prunus armeniaca]
PaF106G0100004820.01	1455	1323	1383	653	497	771	17.6325	19.18	17.2878	8.60056	7.03022	9.34824	8.18795e-17	-1.01157	down	[M]	Cell wall/membrane/envelope biogenesis	Molecular Function: catalytic activity (GO:0003824);;	K06118|3.0e-284|pmum:103320566|K06118 UDP-sulfoquinovose synthase [EC:3.13.1.1] | (RefSeq) UDP-sulfoquinovose synthase, chloroplastic	Amino sugar and nucleotide sugar metabolism (ko00520);; Glycerolipid metabolism (ko00561)	[M]	Cell wall/membrane/envelope biogenesis	NAD dependent epimerase/dehydratase family	UDP-sulfoquinovose synthase, chloroplastic OS=Spinacia oleracea OX=3562 GN=SQD1 PE=1 SV=1	M	Cell wall/membrane/envelope biogenesis	unnamed protein product [Prunus armeniaca]
PaF106G0200010593.01	26	5	15	106	96	160	0.620203	0.125423	0.362998	2.76275	2.67446	3.84926	1.65908e-12	2.29814	up	--	--	Biological Process: microtubule cytoskeleton organization (GO:0000226);; Biological Process: mitotic cell cycle (GO:0000278);; Biological Process: nuclear division (GO:0000280);; Biological Process: mitotic cytokinesis (GO:0000281);; Biological Process: cytokinesis (GO:0000910);; Biological Process: microtubule bundle formation (GO:0001578);; Molecular Function: molecular_function (GO:0003674);; …	K03231|8.0e-22|mtr:MTR_1g101870|K03231 elongation factor 1-alpha | (RefSeq) elongation factor 1-alpha	RNA transport (ko03013)	[O]	Posttranslational modification, protein turnover, chaperones	ATPase family associated with various cellular activities (AAA)	Protein SUPPRESSOR OF K(+) TRANSPORT GROWTH DEFECT 1 OS=Arabidopsis thaliana OX=3702 GN=SKD1 PE=1 SV=1	O	Posttranslational modification, protein turnover, chaperones	hypothetical protein C3L33_16386, partial [Rhododendron williamsianum]
PaF106G0500021285.01	125	103	100	32	22	37	3.10239	3.05297	2.56275	0.862535	0.627781	0.902283	2.49025e-07	-1.47607	down	--	--	Molecular Function: DNA binding (GO:0003677);;	K15777|2.7e-24|mesc:110630336|K15777 4,5-DOPA dioxygenase extradiol [EC:1.13.11.-] | (RefSeq) uncharacterized protein LOC110630336	Betalain biosynthesis (ko00965)	--	--	ZF-HD protein dimerisation region	Zinc-finger homeodomain protein 11 OS=Oryza sativa subsp. indica OX=39946 GN=ZHD11 PE=3 SV=1	S	Function unknown	unnamed protein product [Prunus armeniaca]
PaF106G0600024640.01	138	74	168	0	7	5	3.82974	2.44766	4.81151	0	0.2247	0.133809	1.59729e-19	-3.11992	down	[R]	General function prediction only	Molecular Function: molecular_function (GO:0003674);; Molecular Function: catalytic activity (GO:0003824);; Biological Process: cellular aldehyde metabolic process (GO:0006081);; Biological Process: organic acid metabolic process (GO:0006082);; Biological Process: lactate metabolic process (GO:0006089);; Biological Process: biological_process (GO:0008150);; Biological Process: metabolic process (…	K18881|8.7e-57|pavi:110765120|K18881 D-lactate dehydratase [EC:4.2.1.130] | (RefSeq) protein DJ-1 homolog D-like	Pyruvate metabolism (ko00620)	[RV]	General function prediction only;; Defense mechanisms	DJ-1/PfpI family	Protein DJ-1 homolog D OS=Arabidopsis thaliana OX=3702 GN=DJ1D PE=1 SV=1	V	Defense mechanisms	protein DJ-1 homolog D-like [Prunus dulcis]
PaF106G0400016068.01	2616	2135	2418	856	827	910	44.2163	43.1897	42.1569	15.7402	16.308	15.3903	5.3318e-54	-1.35536	down	[I]	Lipid transport and metabolism	Molecular Function: 3-hydroxyacyl-CoA dehydrogenase activity (GO:0003857);; Biological Process: fatty acid metabolic process (GO:0006631);; Molecular Function: NAD+ binding (GO:0070403);;	K00074|6.7e-165|pmum:103326052|K00074 3-hydroxybutyryl-CoA dehydrogenase [EC:1.1.1.157] | (RefSeq) 3-hydroxybutyryl-CoA dehydrogenase	Phenylalanine metabolism (ko00360);; Butanoate metabolism (ko00650);; Carbon metabolism (ko01200)	[I]	Lipid transport and metabolism	3-hydroxyacyl-CoA dehydrogenase, NAD binding domain	--	I	Lipid transport and metabolism	unnamed protein product [Prunus armeniaca]
PaF106G0200008874.01	1412	1086	1289	308	283	303	23.742	22.4129	22.4083	5.62004	5.22563	4.72417	7.48635e-62	-1.9357	down	[U]	Intracellular trafficking, secretion, and vesicular transport	Molecular Function: GTPase activity (GO:0003924);; Molecular Function: signal recognition particle binding (GO:0005047);; Molecular Function: GTP binding (GO:0005525);; Biological Process: protein targeting (GO:0006605);; Biological Process: SRP-dependent cotranslational protein targeting to membrane (GO:0006614);; Cellular Component: membrane (GO:0016020);;	K03110|5.0e-199|pmum:103331861|K03110 fused signal recognition particle receptor | (RefSeq) cell division protein FtsY homolog, chloroplastic	Protein export (ko03060)	[U]	Intracellular trafficking, secretion, and vesicular transport	SRP54-type protein, GTPase domain	Cell division protein FtsY homolog, chloroplastic OS=Arabidopsis thaliana OX=3702 GN=CPFTSY PE=1 SV=2	U	Intracellular trafficking, secretion, and vesicular transport	unnamed protein product [Prunus armeniaca]
Prunus_sibirica_newGene_1378	204	266	187	0	0	0	2.41333	3.75902	2.28209	0	0	0	1.18461e-47	-4.79035	down	[O]	Posttranslational modification, protein turnover, chaperones	Molecular Function: ATP binding (GO:0005524);;	K03283|1.4e-237|pmum:103341773|K03283 heat shock 70kDa protein 1/2/6/8 | (RefSeq) heat shock cognate 70 kDa protein-like	Spliceosome (ko03040);; Protein processing in endoplasmic reticulum (ko04141);; Endocytosis (ko04144)	[O]	Posttranslational modification, protein turnover, chaperones	Hsp70 protein	Heat shock 70 kDa protein 18 OS=Arabidopsis thaliana OX=3702 GN=HSP70-18 PE=2 SV=1	O	Posttranslational modification, protein turnover, chaperones	PREDICTED: heat shock cognate 70 kDa protein-like [Prunus mume]
PaF106G0800031023.01	92	45	57	268	388	435	1.28159	0.736536	0.820376	4.06113	6.3183	6.06537	6.66123e-24	2.31468	up	[G]	Carbohydrate transport and metabolism	Molecular Function: UDP-glycosyltransferase activity (GO:0008194);;	K23260|2.4e-281|pmum:103335255|K23260 scopoletin glucosyltransferase [EC:2.4.1.128] | (RefSeq) scopoletin glucosyltransferase-like	Phenylpropanoid biosynthesis (ko00940)	[GC]	Carbohydrate transport and metabolism;; Energy production and conversion	UDP-glucoronosyl and UDP-glucosyl transferase	Scopoletin glucosyltransferase OS=Nicotiana tabacum OX=4097 GN=TOGT1 PE=1 SV=1	--	--	unnamed protein product [Prunus armeniaca]
PaF106G0100006049.01	5	0	0	65	51	55	0.068814	0	0	0.968432	0.813506	0.761675	1.79378e-12	2.62641	up	[G]	Carbohydrate transport and metabolism	Molecular Function: hydrolase activity, hydrolyzing O-glycosyl compounds (GO:0004553);; Biological Process: carbohydrate metabolic process (GO:0005975);;	K01188|3.7e-63|fve:101292823|K01188 beta-glucosidase [EC:3.2.1.21] | (RefSeq) beta-glucosidase 24-like	Cyanoamino acid metabolism (ko00460);; Starch and sucrose metabolism (ko00500);; Phenylpropanoid biosynthesis (ko00940)	[G]	Carbohydrate transport and metabolism	Glycosyl hydrolase family 1	Beta-glucosidase 24 OS=Oryza sativa subsp. japonica OX=39947 GN=BGLU24 PE=2 SV=1	G	Carbohydrate transport and metabolism	beta-glucosidase 24-like [Prunus avium]
PaF106G0500020376.01	467	328	324	131	132	204	2.72729	2.29271	1.94726	0.828741	0.898765	1.18961	1.69405e-08	-1.09802	down	[L]	Replication, recombination and repair	Molecular Function: DNA binding (GO:0003677);; Molecular Function: DNA-directed DNA polymerase activity (GO:0003887);; Molecular Function: ATP binding (GO:0005524);; Biological Process: DNA replication (GO:0006260);; Cellular Component: DNA polymerase III complex (GO:0009360);;	K10756|5.3e-12|ota:OT_ostta02g00555|K10756 replication factor C subunit 3/5 | (RefSeq) P-loop containing nucleoside triphosphate hydrolase	DNA replication (ko03030);; Nucleotide excision repair (ko03420);; Mismatch repair (ko03430)	[L]	Replication, recombination and repair	DNA polymerase III, delta subunit	Protein STICHEL-like 2 OS=Arabidopsis thaliana OX=3702 GN=At4g24790 PE=3 SV=1	L	Replication, recombination and repair	unnamed protein product [Prunus armeniaca]
PaF106G0300013739.01	100	73	84	152	158	237	1.84976	1.61025	1.60221	3.08384	3.43972	4.41028	4.14295e-06	1.05664	up	[Q]	Secondary metabolites biosynthesis, transport and catabolism	Molecular Function: oxidoreductase activity (GO:0016491);; Molecular Function: metal ion binding (GO:0046872);;	K04124|1.7e-218|pavi:110760088|K04124 gibberellin 3beta-dioxygenase [EC:1.14.11.15] | (RefSeq) gibberellin 3-beta-dioxygenase 1	Diterpenoid biosynthesis (ko00904)	[QR]	Secondary metabolites biosynthesis, transport and catabolism;; General function prediction only	2OG-Fe(II) oxygenase superfamily	Gibberellin 3-beta-dioxygenase 1 OS=Pisum sativum OX=3888 GN=LE PE=1 SV=1	Q	Secondary metabolites biosynthesis, transport and catabolism	unnamed protein product [Prunus armeniaca]
PaF106G0600022647.01	121	84	121	48	21	16	1.58499	1.31073	1.62271	0.675073	0.317072	0.198846	6.68208e-05	-1.35775	down	[P]	Inorganic ion transport and metabolism	Cellular Component: plasma membrane (GO:0005886);; Cellular Component: plant-type vacuole membrane (GO:0009705);; Molecular Function: nitrate transmembrane transporter activity (GO:0015112);; Biological Process: nitrate transport (GO:0015706);; Cellular Component: integral component of membrane (GO:0016021);; Biological Process: cellular response to nitrate (GO:0071249);;	K02575|1.5e-305|pmum:103325807|K02575 MFS transporter, NNP family, nitrate/nitrite transporter | (RefSeq) high-affinity nitrate transporter 2.1-like	Nitrogen metabolism (ko00910)	--	--	Major Facilitator Superfamily	High-affinity nitrate transporter 2.1 OS=Arabidopsis thaliana OX=3702 GN=NRT2.1 PE=1 SV=1	P	Inorganic ion transport and metabolism	unnamed protein product [Prunus armeniaca]
PaF106G0600024659.01	106	99	83	0	0	0	0.704454	0.789606	0.572152	0	0	0	5.94056e-26	-3.73099	down	--	--	--	K12447|2.2e-50|dzi:111312249|K12447 UDP-sugar pyrophosphorylase [EC:2.7.7.64] | (RefSeq) UDP-sugar pyrophosphorylase-like isoform X1	Pentose and glucuronate interconversions (ko00040);; Galactose metabolism (ko00052);; Ascorbate and aldarate metabolism (ko00053);; Amino sugar and nucleotide sugar metabolism (ko00520)	[R]	General function prediction only	--	--	O	Posttranslational modification, protein turnover, chaperones	hypothetical protein PRUPE_6G327500, partial [Prunus persica]
PaF106G0500018911.01	454	375	506	25	39	61	10.9803	10.8658	12.64	0.647916	1.09329	1.47644	1.32086e-42	-3.00566	down	--	--	Biological Process: protein polyubiquitination (GO:0000209);; Cellular Component: nucleus (GO:0005634);; Cellular Component: endoplasmic reticulum (GO:0005783);; Molecular Function: ubiquitin conjugating enzyme activity (GO:0061631);;	K10578|4.7e-116|pmum:103336879|K10578 ubiquitin-conjugating enzyme E2 J1 [EC:2.3.2.23] | (RefSeq) ubiquitin-conjugating enzyme E2 32-like isoform X1	Ubiquitin mediated proteolysis (ko04120);; Protein processing in endoplasmic reticulum (ko04141)	[O]	Posttranslational modification, protein turnover, chaperones	Ubiquitin-conjugating enzyme	Ubiquitin-conjugating enzyme E2 32 OS=Arabidopsis thaliana OX=3702 GN=UBC32 PE=2 SV=1	O	Posttranslational modification, protein turnover, chaperones	PREDICTED: ubiquitin-conjugating enzyme E2 32-like isoform X1 [Prunus mume]
PaF106G0300012326.01	90	47	44	178	148	209	1.11913	0.88889	0.432974	3.21169	1.65494	3.39445	3.52142e-08	1.4394	up	--	--	Molecular Function: UDP-glycosyltransferase activity (GO:0008194);;	K23452|1.1e-149|eus:EUTSA_v10009957mg|K23452 UDP-glucosyltransferase 85A [EC:2.4.1.-] | (RefSeq) hypothetical protein	Zeatin biosynthesis (ko00908)	[GC]	Carbohydrate transport and metabolism;; Energy production and conversion	UDP-glucoronosyl and UDP-glucosyl transferase	7-deoxyloganetin glucosyltransferase OS=Catharanthus roseus OX=4058 GN=UGT85A23 PE=1 SV=1	--	--	UDP-glucosyl transferase 85A2, partial [Prunus dulcis]
PaF106G0500020819.01	157	180	192	432	396	501	4.09962	5.61129	5.16855	12.2921	12.0922	13.1086	2.1481e-15	1.33163	up	[T]	Signal transduction mechanisms	Biological Process: phosphorelay signal transduction system (GO:0000160);;	K12127|7.9e-37|hbr:110635669|K12127 pseudo-response regulator 1 | (RefSeq) two-component response regulator-like APRR1	Circadian rhythm - plant (ko04712)	[K]	Transcription	Response regulator receiver domain	Two-component response regulator-like APRR1 OS=Arabidopsis thaliana OX=3702 GN=APRR1 PE=1 SV=1	K	Transcription	unnamed protein product [Prunus armeniaca]
PaF106G0600024436.01	34	13	16	75	69	92	4.19726	1.83489	2.07804	10.2745	10.1001	11.6563	4.13426e-06	1.52493	up	--	--	Cellular Component: integral component of membrane (GO:0016021);;	K00784|9.9e-11|mcha:111016700|K00784 ribonuclease Z [EC:3.1.26.11] | (RefSeq) tRNase Z TRZ3, mitochondrial isoform X1	RNA transport (ko03013)	[R]	General function prediction only	--	tRNAse Z TRZ4, mitochondrial OS=Arabidopsis thaliana OX=3702 GN=TRZ4 PE=2 SV=1	S	Function unknown	hypothetical protein PRUPE_7G044400 [Prunus persica]
PaF106G0100003842.01	10120	10069	11183	3931	3164	3868	144.634	172.262	164.809	61.2946	52.6386	55.5266	1.43583e-46	-1.40813	down	[H]	Coenzyme transport and metabolism	Molecular Function: nicotinate-nucleotide diphosphorylase (carboxylating) activity (GO:0004514);; Biological Process: NAD biosynthetic process (GO:0009435);;	K00767|1.1e-110|pavi:110765461|K00767 nicotinate-nucleotide pyrophosphorylase (carboxylating) [EC:2.4.2.19] | (RefSeq) nicotinate-nucleotide pyrophosphorylase [carboxylating], chloroplastic	Nicotinate and nicotinamide metabolism (ko00760)	[F]	Nucleotide transport and metabolism	Quinolinate phosphoribosyl transferase, N-terminal domain	Nicotinate-nucleotide pyrophosphorylase [carboxylating], chloroplastic OS=Arabidopsis thaliana OX=3702 GN=QPT PE=2 SV=2	F	Nucleotide transport and metabolism	unnamed protein product [Prunus armeniaca]
PaF106G0500019685.01	38	21	32	106	69	70	0.532548	0.521149	0.787217	1.82743	1.29366	1.20377	0.000189717	1.2091	up	[H]	Coenzyme transport and metabolism	Molecular Function: glutamate-cysteine ligase activity (GO:0004357);; Molecular Function: ATP binding (GO:0005524);; Biological Process: glutathione biosynthetic process (GO:0006750);; Cellular Component: chloroplast (GO:0009507);;	K01919|2.3e-287|pper:18777994|K01919 glutamate--cysteine ligase [EC:6.3.2.2] | (RefSeq) glutamate--cysteine ligase, chloroplastic	Cysteine and methionine metabolism (ko00270);; Glutathione metabolism (ko00480)	--	--	Glutamate-cysteine ligase family 2(GCS2)	Glutamate--cysteine ligase, chloroplastic OS=Nicotiana tabacum OX=4097 GN=GSH1 PE=2 SV=2	H	Coenzyme transport and metabolism	unnamed protein product [Prunus armeniaca]
PaF106G0100001985.01	48	48	46	125	166	148	0.42864	0.516514	0.428718	1.22788	1.74586	1.33636	6.92503e-09	1.49479	up	--	--	--	K20535|2.3e-06|nta:107797610|K20535 mitogen-activated protein kinase 1/2 [EC:2.7.11.24] | (RefSeq) mitogen-activated protein kinase KSS1-like	MAPK signaling pathway - plant (ko04016)	--	--	Myb/SANT-like DNA-binding domain	--	S	Function unknown	hypothetical protein PRUPE_1G245200 [Prunus persica]
PaF106G0100001343.01	472	424	397	644	939	1071	6.51337	7.00318	5.64206	9.67094	15.1218	14.8047	1.12205e-10	1.06306	up	--	--	Molecular Function: transcription factor activity, sequence-specific DNA binding (GO:0003700);; Cellular Component: nucleus (GO:0005634);; Molecular Function: sequence-specific DNA binding (GO:0043565);;	K12835|1.1e-37|cmax:111493042|K12835 ATP-dependent RNA helicase DDX42 [EC:3.6.4.13] | (RefSeq) DEAD-box ATP-dependent RNA helicase 24 isoform X1	Spliceosome (ko03040)	--	--	WRKY DNA -binding domain	Probable WRKY transcription factor 48 OS=Arabidopsis thaliana OX=3702 GN=WRKY48 PE=2 SV=1	K	Transcription	unnamed protein product [Prunus armeniaca]
PaF106G0100000860.01	143	312	229	406	520	518	2.8218	7.37958	4.66607	8.73021	12.0021	10.2641	8.32625e-05	1.00027	up	--	--	Molecular Function: DNA binding (GO:0003677);; Molecular Function: protein dimerization activity (GO:0046983);;	K13422|5.5e-12|dct:110116479|K13422 transcription factor MYC2 | (RefSeq) transcription factor MYC2	MAPK signaling pathway - plant (ko04016);; Plant hormone signal transduction (ko04075)	--	--	Helix-loop-helix DNA-binding domain	Transcription factor bHLH35 OS=Arabidopsis thaliana OX=3702 GN=BHLH35 PE=2 SV=1	K	Transcription	PREDICTED: transcription factor bHLH35 [Prunus mume]
PaF106G0400017290.01	162	99	118	20	25	8	2.10534	1.53916	1.57944	0.270558	0.379659	0.09282	3.90882e-10	-2.03608	down	[E]	Amino acid transport and metabolism	Biological Process: cellular amino acid metabolic process (GO:0006520);; Molecular Function: carboxy-lyase activity (GO:0016831);; Molecular Function: pyridoxal phosphate binding (GO:0030170);;	K01593|1.6e-307|pavi:110755508|K01593 aromatic-L-amino-acid/L-tryptophan decarboxylase [EC:4.1.1.28 4.1.1.105] | (RefSeq) tyrosine/DOPA decarboxylase 1-like	Tyrosine metabolism (ko00350);; Phenylalanine metabolism (ko00360);; Tryptophan metabolism (ko00380);; Isoquinoline alkaloid biosynthesis (ko00950);; Betalain biosynthesis (ko00965)	[E]	Amino acid transport and metabolism	Pyridoxal-dependent decarboxylase conserved domain	Phenylacetaldehyde synthase OS=Rosa hybrid cultivar OX=128735 GN=PAAS PE=1 SV=1	E	Amino acid transport and metabolism	unnamed protein product [Prunus armeniaca]
Prunus_sibirica_newGene_1780	531	400	397	1354	1242	1048	4.77169	4.22343	3.59741	13.3123	13.014	9.3541	2.72053e-21	1.49222	up	[V]	Defense mechanisms	Molecular Function: ATP binding (GO:0005524);; Cellular Component: plasma membrane (GO:0005886);; Cellular Component: integral component of membrane (GO:0016021);; Molecular Function: ATPase activity (GO:0016887);; Molecular Function: ATPase activity, coupled to transmembrane movement of substances (GO:0042626);; Biological Process: transmembrane transport (GO:0055085);;	K08712|1.1e-65|gsl:Gasu_29800|K08712 ATP-binding cassette, subfamily G (WHITE), member 2, SNQ2 | (RefSeq) ABC transporter, ATP-binding protein	ABC transporters (ko02010)	[Q]	Secondary metabolites biosynthesis, transport and catabolism	ABC transporter	Pleiotropic drug resistance protein 1 OS=Nicotiana tabacum OX=4097 GN=PDR1 PE=2 SV=1	Q	Secondary metabolites biosynthesis, transport and catabolism	PREDICTED: pleiotropic drug resistance protein 1-like [Prunus mume]
PaF106G0200010488.01	2138	1849	2399	1007	764	1063	67.0254	69.3755	77.5871	34.3489	27.9573	33.3693	1.89709e-19	-1.06092	down	--	--	Biological Process: metal ion transport (GO:0030001);; Molecular Function: metal ion binding (GO:0046872);;	K11883|8.4e-18|nau:109216591|K11883 RNA-binding protein NOB1 | (RefSeq) RNA-binding protein NOB1 isoform X1	Ribosome biogenesis in eukaryotes (ko03008)	[P]	Inorganic ion transport and metabolism	--	Heavy metal-associated isoprenylated plant protein 39 OS=Arabidopsis thaliana OX=3702 GN=HIPP39 PE=2 SV=1	P	Inorganic ion transport and metabolism	unnamed protein product [Prunus armeniaca]
PaF106G0100005506.01	15	18	24	108	97	117	0.214493	0.304066	0.358905	1.73681	1.66684	1.73524	1.85065e-12	2.08303	up	--	--	Cellular Component: integral component of membrane (GO:0016021);; Molecular Function: transmembrane transporter activity (GO:0022857);;	K02940|1.5e-09|dzi:111289747|K02940 large subunit ribosomal protein L9e | (RefSeq) 60S ribosomal protein L9 isoform X1	Ribosome (ko03010)	--	--	EamA-like transporter family	WAT1-related protein At5g07050 OS=Arabidopsis thaliana OX=3702 GN=At5g07050 PE=2 SV=1	S	Function unknown	WAT1-related protein [Prunus yedoensis var. nudiflora]
PaF106G0700026433.01	392	361	202	108	126	159	6.75164	7.42527	3.57701	2.01875	2.51972	2.73141	1.4789e-05	-1.06997	down	[K]	Transcription	Molecular Function: GTPase activity (GO:0003924);; Molecular Function: GTP binding (GO:0005525);; Biological Process: small GTPase mediated signal transduction (GO:0007264);;	K04392|1.8e-116|pmum:103340893|K04392 Ras-related C3 botulinum toxin substrate 1 | (RefSeq) rac-like GTP-binding protein ARAC7	Phagosome (ko04145)	[R]	General function prediction only	Ras family	Rac-like GTP-binding protein ARAC7 OS=Arabidopsis thaliana OX=3702 GN=ARAC7 PE=1 SV=1	S	Function unknown	PREDICTED: rac-like GTP-binding protein ARAC7 [Prunus mume]
PaF106G0600024632.01	25	28	22	104	107	158	0.233281	0.303235	0.211965	1.05945	1.165	1.47818	4.00137e-12	1.96353	up	[T]	Signal transduction mechanisms	Molecular Function: protein kinase activity (GO:0004672);; Molecular Function: ATP binding (GO:0005524);; Cellular Component: integral component of membrane (GO:0016021);; Molecular Function: carbohydrate binding (GO:0030246);;	K22133|2.3e-72|egr:104443803|K22133 oxalate---CoA ligase [EC:6.2.1.8] | (RefSeq) oxalate--CoA ligase isoform X2	Glyoxylate and dicarboxylate metabolism (ko00630)	--	--	Legume lectin domain	L-type lectin-domain containing receptor kinase IV.1 OS=Arabidopsis thaliana OX=3702 GN=LECRK41 PE=2 SV=1	T	Signal transduction mechanisms	PREDICTED: L-type lectin-domain containing receptor kinase IV.1-like [Prunus mume]
PaF106G0800032454.01	71	68	43	8	9	9	0.718534	0.81941	0.449696	0.078609	0.103262	0.090474	2.43821e-07	-1.84069	down	[R]	General function prediction only	Biological Process: signal transduction (GO:0007165);; Molecular Function: ADP binding (GO:0043531);;	K00695|8.0e-89|mtr:MTR_6g478030|K00695 sucrose synthase [EC:2.4.1.13] | (RefSeq) sucrose synthase	Starch and sucrose metabolism (ko00500)	--	--	NB-ARC domain	Disease resistance protein Roq1 OS=Nicotiana benthamiana OX=4100 GN=ROQ1 PE=1 SV=1	S	Function unknown	PREDICTED: TMV resistance protein N-like [Prunus mume]
Prunus_sibirica_newGene_1338	7	5	5	226	234	208	0.032105	0.024194	0.023004	1.15863	1.28456	0.978153	1.69787e-47	4.1749	up	--	--	Biological Process: signal transduction (GO:0007165);; Molecular Function: ADP binding (GO:0043531);;	K00695|2.1e-97|mtr:MTR_6g478030|K00695 sucrose synthase [EC:2.4.1.13] | (RefSeq) sucrose synthase	Starch and sucrose metabolism (ko00500)	--	--	TIR domain	Disease resistance protein Roq1 OS=Nicotiana benthamiana OX=4100 GN=ROQ1 PE=1 SV=1	S	Function unknown	PREDICTED: TMV resistance protein N-like [Prunus mume]
PaF106G0400016230.01	103	54	102	0	5	6	0.946294	0.584796	0.963545	0	0.043355	0.049396	2.66299e-14	-2.7193	down	--	--	Cellular Component: integral component of membrane (GO:0016021);;	K13466|3.5e-21|vvi:100246778|K13466 EIX receptor 1/2 | (RefSeq) receptor-like protein 12	Plant-pathogen interaction (ko04626)	--	--	Leucine rich repeat	Receptor-like protein EIX1 OS=Solanum lycopersicum OX=4081 GN=EIX1 PE=2 SV=2	T	Signal transduction mechanisms	receptor-like protein 2 [Prunus persica]
PaF106G0600023960.01	50	45	11	601	605	689	0.351943	0.376431	0.073407	4.61966	4.98624	4.87506	7.39321e-12	2.52453	up	--	--	Biological Process: defense response (GO:0006952);; Molecular Function: ADP binding (GO:0043531);;	K13457|0.0e+00|pper:18774035|K13457 disease resistance protein RPM1 | (RefSeq) disease resistance protein RPM1	Plant-pathogen interaction (ko04626)	[T]	Signal transduction mechanisms	NB-ARC domain	Disease resistance protein RPM1 OS=Arabidopsis thaliana OX=3702 GN=RPM1 PE=1 SV=1	T	Signal transduction mechanisms	disease resistance protein RPM1 [Prunus yedoensis var. nudiflora]
PaF106G0100002481.01	320	232	275	50	82	58	4.67053	4.04831	4.14707	0.781573	1.39144	0.83962	9.07665e-15	-1.79953	down	[R]	General function prediction only	Molecular Function: chitinase activity (GO:0004568);; Biological Process: carbohydrate metabolic process (GO:0005975);; Biological Process: chitin catabolic process (GO:0006032);; Biological Process: cell wall macromolecule catabolic process (GO:0016998);;	K01183|8.8e-136|pmum:103322431|K01183 chitinase [EC:3.2.1.14] | (RefSeq) endochitinase EP3-like	Amino sugar and nucleotide sugar metabolism (ko00520)	[R]	General function prediction only	Chitinase class I	Endochitinase EP3 OS=Arabidopsis thaliana OX=3702 GN=EP3 PE=1 SV=1	S	Function unknown	unnamed protein product [Prunus armeniaca]
PaF106G0200007390.01	493	423	502	170	199	211	2.15717	2.28175	2.31136	0.779435	1.01102	0.888456	1.82287e-13	-1.14721	down	[R]	General function prediction only	Molecular Function: ADP binding (GO:0043531);;	K12818|3.6e-164|mtr:MTR_0267s0070|K12818 ATP-dependent RNA helicase DHX8/PRP22 [EC:3.6.4.13] | (RefSeq) NB-ARC domain disease resistance protein, putative	Spliceosome (ko03040)	[T]	Signal transduction mechanisms	NB-ARC domain	Putative disease resistance RPP13-like protein 1 OS=Arabidopsis thaliana OX=3702 GN=RPPL1 PE=3 SV=1	T	Signal transduction mechanisms	PREDICTED: LOW QUALITY PROTEIN: putative disease resistance RPP13-like protein 1 [Prunus mume]
PaF106G0400015437.01	98	32	67	224	300	316	0.407081	0.159499	0.290573	1.01501	1.52823	1.36949	3.75817e-13	1.90119	up	[V]	Defense mechanisms	Cellular Component: plant-type vacuole (GO:0000325);; Molecular Function: ATP binding (GO:0005524);; Cellular Component: vacuolar membrane (GO:0005774);; Cellular Component: membrane (GO:0016020);; Cellular Component: integral component of membrane (GO:0016021);; Molecular Function: ATPase activity (GO:0016887);; Molecular Function: ATPase activity, coupled to transmembrane movement of substances…	K05666|0.0e+00|mesc:110610975|K05666 ATP-binding cassette, subfamily C (CFTR/MRP), member 2 | (RefSeq) ABC transporter C family member 3-like	ABC transporters (ko02010)	[Q]	Secondary metabolites biosynthesis, transport and catabolism	ABC transporter	ABC transporter C family member 3 OS=Arabidopsis thaliana OX=3702 GN=ABCC3 PE=1 SV=1	Q	Secondary metabolites biosynthesis, transport and catabolism	unnamed protein product [Prunus armeniaca]
PaF106G0100005490.01	6857	4542	5749	2030	2600	3189	99.5586	78.7333	86.1089	32.2919	44.218	46.1304	7.00244e-16	-1.01208	down	--	--	Cellular Component: integral component of membrane (GO:0016021);;	K12472|3.7e-27|bvg:104885038|K12472 epidermal growth factor receptor substrate 15 | (RefSeq) filaggrin-like	Endocytosis (ko04144)	--	--	BURP domain	BURP domain protein RD22 OS=Arabidopsis thaliana OX=3702 GN=RD22 PE=2 SV=1	S	Function unknown	PREDICTED: BURP domain protein RD22-like isoform X2 [Prunus mume]
PaF106G0800031601.01	41	28	42	88	135	162	0.345066	0.280311	0.363098	0.818529	1.34655	1.38655	3.68361e-08	1.56941	up	--	--	Biological Process: defense response (GO:0006952);; Molecular Function: ADP binding (GO:0043531);;	K13457|6.6e-82|qsu:112006818|K13457 disease resistance protein RPM1 | (RefSeq) disease resistance protein RPM1-like	Plant-pathogen interaction (ko04626)	[T]	Signal transduction mechanisms	NB-ARC domain	Putative disease resistance protein At1g50180 OS=Arabidopsis thaliana OX=3702 GN=At1g50180 PE=3 SV=2	T	Signal transduction mechanisms	PREDICTED: putative disease resistance [Prunus dulcis]
PaF106G0700029062.01	34	30	43	98	96	103	0.466366	0.489827	0.620208	1.49954	1.56599	1.44693	3.79226e-06	1.31418	up	--	--	Molecular Function: DNA binding (GO:0003677);; Molecular Function: transcription factor activity, sequence-specific DNA binding (GO:0003700);; Cellular Component: nucleus (GO:0005634);;	K16222|4.3e-33|dct:110107877|K16222 Dof zinc finger protein DOF5.5 | (RefSeq) cyclic dof factor 1 isoform X1	Circadian rhythm - plant (ko04712)	--	--	Dof domain, zinc finger	Cyclic dof factor 2 OS=Arabidopsis thaliana OX=3702 GN=CDF2 PE=1 SV=2	K	Transcription	unnamed protein product [Prunus armeniaca]
PaF106G0400015265.01	12	30	18	42	64	87	0.217293	0.68097	0.340413	0.860005	1.4151	1.6627	0.00109781	1.19606	up	[Q]	Secondary metabolites biosynthesis, transport and catabolism	Molecular Function: oxidoreductase activity (GO:0016491);; Molecular Function: metal ion binding (GO:0046872);;	K14975|1.7e-58|psom:113311621|K14975 codeine 3-O-demethylase [EC:1.14.11.32] | (RefSeq) codeine O-demethylase	Isoquinoline alkaloid biosynthesis (ko00950)	[QR]	Secondary metabolites biosynthesis, transport and catabolism;; General function prediction only	non-haem dioxygenase in morphine synthesis N-terminal	Protein SRG1 OS=Arabidopsis thaliana OX=3702 GN=SRG1 PE=2 SV=1	Q	Secondary metabolites biosynthesis, transport and catabolism	unnamed protein product [Prunus armeniaca]
PaF106G0700028364.01	5	0	0	312	221	311	0.018069	0	0	1.26062	0.95663	1.15561	1.90593e-61	5.03267	up	--	--	Biological Process: signal transduction (GO:0007165);; Molecular Function: ADP binding (GO:0043531);;	K16225|1.0e-61|ath:AT5G45260|K16225 probable WRKY transcription factor 52 | (RefSeq) RRS1; Disease resistance protein (TIR-NBS-LRR class)	Plant-pathogen interaction (ko04626)	--	--	NB-ARC domain	Disease resistance protein Roq1 OS=Nicotiana benthamiana OX=4100 GN=ROQ1 PE=1 SV=1	S	Function unknown	PREDICTED: LOW QUALITY PROTEIN: uncharacterized protein LOC103339370 [Prunus mume]
PaF106G0200007240.01	559	420	535	92	105	120	2.45569	2.20937	2.4251	0.439274	0.53509	0.526847	1.34937e-35	-2.05089	down	[R]	General function prediction only	Molecular Function: ADP binding (GO:0043531);;	K12818|8.6e-122|mtr:MTR_0267s0070|K12818 ATP-dependent RNA helicase DHX8/PRP22 [EC:3.6.4.13] | (RefSeq) NB-ARC domain disease resistance protein, putative	Spliceosome (ko03040)	[T]	Signal transduction mechanisms	NB-ARC domain	Putative disease resistance RPP13-like protein 1 OS=Arabidopsis thaliana OX=3702 GN=RPPL1 PE=3 SV=1	T	Signal transduction mechanisms	PREDICTED: LOW QUALITY PROTEIN: putative disease resistance RPP13-like protein 1 [Prunus mume]
PaF106G0100005998.01	225	153	115	46	37	32	2.7965	2.27452	1.47371	0.618846	0.536017	0.387851	8.33002e-09	-1.65295	down	--	--	Molecular Function: UDP-glycosyltransferase activity (GO:0008194);; Cellular Component: intracellular membrane-bounded organelle (GO:0043231);; Molecular Function: quercetin 3-O-glucosyltransferase activity (GO:0080043);; Molecular Function: quercetin 7-O-glucosyltransferase activity (GO:0080044);;	K22706|7.3e-195|pper:18788923|K22706 (R)-mandelonitrile beta-glucosyltransferase [EC:2.4.1.354] | (RefSeq) 7-deoxyloganetin glucosyltransferase	Cyanoamino acid metabolism (ko00460)	[GC]	Carbohydrate transport and metabolism;; Energy production and conversion	UDP-glucoronosyl and UDP-glucosyl transferase	7-deoxyloganetin glucosyltransferase OS=Gardenia jasminoides OX=114476 GN=UGT85A24 PE=1 SV=1	--	--	PREDICTED: 7-deoxyloganetin glucosyltransferase-like [Prunus mume]
PaF106G0300012327.01	0	0	0	56	55	77	0	0	0	0.858269	0.899087	1.09002	7.06125e-19	3.25012	up	--	--	Molecular Function: UDP-glycosyltransferase activity (GO:0008194);;	K22706|4.5e-157|pper:18788923|K22706 (R)-mandelonitrile beta-glucosyltransferase [EC:2.4.1.354] | (RefSeq) 7-deoxyloganetin glucosyltransferase	Cyanoamino acid metabolism (ko00460)	[GC]	Carbohydrate transport and metabolism;; Energy production and conversion	UDP-glucoronosyl and UDP-glucosyl transferase	7-deoxyloganetin glucosyltransferase OS=Catharanthus roseus OX=4058 GN=UGT85A23 PE=1 SV=1	--	--	PREDICTED: 7-deoxyloganetin glucosyltransferase-like isoform X1 [Prunus mume]
PaF106G0200010085.01	289	271	340	626	565	612	5.76758	6.45266	6.98774	13.5825	13.1641	12.2319	1.39267e-12	1.04925	up	--	--	Molecular Function: peroxidase activity (GO:0004601);; Cellular Component: extracellular region (GO:0005576);; Biological Process: response to oxidative stress (GO:0006979);; Molecular Function: heme binding (GO:0020037);; Biological Process: hydrogen peroxide catabolic process (GO:0042744);; Molecular Function: metal ion binding (GO:0046872);;	K00430|2.0e-175|pper:18785759|K00430 peroxidase [EC:1.11.1.7] | (RefSeq) peroxidase P7	Phenylpropanoid biosynthesis (ko00940)	--	--	Peroxidase	Peroxidase 52 OS=Arabidopsis thaliana OX=3702 GN=PER52 PE=2 SV=1	Q	Secondary metabolites biosynthesis, transport and catabolism	unnamed protein product [Prunus armeniaca]
PaF106G0800030531.01	81	64	100	18	16	54	1.57541	1.88155	1.72372	0.476878	0.446426	1.33396	0.00376071	-1.04062	down	[K]	Transcription	Molecular Function: O-methyltransferase activity (GO:0008171);; Molecular Function: S-adenosylmethionine-dependent methyltransferase activity (GO:0008757);; Biological Process: aromatic compound biosynthetic process (GO:0019438);; Biological Process: methylation (GO:0032259);; Molecular Function: protein dimerization activity (GO:0046983);;	K22588|1.4e-105|crb:17880076|K22588 acetylserotonin O-methyltransferase, plant [EC:2.1.1.4] | (RefSeq) xanthohumol 4'-O-methyltransferase	Tryptophan metabolism (ko00380)	[R]	General function prediction only	O-methyltransferase domain	Acetylserotonin O-methyltransferase OS=Arabidopsis thaliana OX=3702 GN=ASMT PE=1 SV=1	S	Function unknown	unnamed protein product [Prunus armeniaca]
PaF106G0100006682.01	738	523	628	11	21	39	5.77557	4.90213	5.07405	0.086736	0.188259	0.303691	1.2019e-78	-4.15306	down	--	--	Cellular Component: integral component of membrane (GO:0016021);; Molecular Function: kinase activity (GO:0016301);;	K13466|4.0e-52|jre:108979830|K13466 EIX receptor 1/2 | (RefSeq) receptor-like protein EIX2 isoform X1	Plant-pathogen interaction (ko04626)	[R]	General function prediction only	Leucine rich repeat	Receptor like protein 22 OS=Arabidopsis thaliana OX=3702 GN=RLP22 PE=2 SV=1	Q	Secondary metabolites biosynthesis, transport and catabolism	PREDICTED: probable leucine-rich repeat receptor-like protein kinase At2g33170 [Prunus mume]
PaF106G0500019643.01	52	33	54	91	89	120	1.02537	0.781273	1.10501	1.96928	2.06714	2.38257	0.00032228	1.01869	up	[IQR]	Lipid transport and metabolism;; Secondary metabolites biosynthesis, transport and catabolism;; General function prediction only	Cellular Component: membrane (GO:0016020);; Biological Process: oxidation-reduction process (GO:0055114);;	K15095|7.0e-162|pmum:103337493|K15095 (+)-neomenthol dehydrogenase [EC:1.1.1.208] | (RefSeq) salutaridine reductase-like	Monoterpenoid biosynthesis (ko00902)	[Q]	Secondary metabolites biosynthesis, transport and catabolism	short chain dehydrogenase	Salutaridine reductase OS=Papaver bracteatum OX=215227 GN=SALR PE=1 SV=1	Q	Secondary metabolites biosynthesis, transport and catabolism	PREDICTED: salutaridine reductase-like [Prunus mume]
PaF106G0800032177.01	72	64	83	5	5	12	2.62318	2.80092	3.1098	0.191598	0.19488	0.425257	1.12516e-10	-2.23287	down	--	--	Cellular Component: photosystem I (GO:0009522);; Cellular Component: chloroplast thylakoid membrane (GO:0009535);; Biological Process: photosynthesis (GO:0015979);; Cellular Component: integral component of membrane (GO:0016021);;	K02634|1.2e-48|dzi:111284174|K02634 apocytochrome f | (RefSeq) uncharacterized protein LOC111284174	Photosynthesis (ko00195)	--	--	Ycf4	Photosystem I assembly protein Ycf4 OS=Nicotiana tomentosiformis OX=4098 GN=ycf4 PE=3 SV=1	S	Function unknown	Ycf4 [Prunus sibirica]
PaF106G0500020594.01	239	347	304	16	21	44	6.72084	11.7009	8.83342	0.46887	0.668936	1.23509	1.20082e-25	-2.85259	down	--	--	--	K03860|6.5e-09|nnu:104608881|K03860 phosphatidylinositol N-acetylglucosaminyltransferase subunit Q | (RefSeq) N-acetylglucosaminyl-phosphatidylinositol biosynthetic protein gpi1-like	Glycosylphosphatidylinositol (GPI)-anchor biosynthesis (ko00563)	--	--	Gibberellin regulated protein	Snakin-2 OS=Solanum tuberosum OX=4113 GN=SN2 PE=1 SV=1	S	Function unknown	unnamed protein product [Prunus armeniaca]
PaF106G0800032113.01	285	288	302	133	70	115	4.63371	5.60847	5.07782	2.36054	1.30761	1.86738	2.7e-08	-1.25203	down	[L]	Replication, recombination and repair	Molecular Function: DNA binding (GO:0003677);; Molecular Function: DNA-directed DNA polymerase activity (GO:0003887);; Biological Process: DNA-dependent DNA replication (GO:0006261);;	K02335|6.8e-12|cme:CYME_CMT462C|K02335 DNA polymerase I [EC:2.7.7.7] | (RefSeq) bacterial DNA polymerase I	DNA replication (ko03030);; Base excision repair (ko03410);; Nucleotide excision repair (ko03420);; Homologous recombination (ko03440)	--	--	5'-3' exonuclease, N-terminal resolvase-like domain	--	L	Replication, recombination and repair	PREDICTED: DNA polymerase I, thermostable [Prunus mume]
PaF106G0200009345.01	1755	1282	1649	412	436	433	24.2747	21.2265	23.5282	6.19922	7.04041	5.98917	4.39881e-49	-1.7254	down	[QR]	Secondary metabolites biosynthesis, transport and catabolism;; General function prediction only	Molecular Function: O-methyltransferase activity (GO:0008171);; Biological Process: methylation (GO:0032259);; Molecular Function: protein dimerization activity (GO:0046983);;	K13066|1.4e-167|pmum:103342359|K13066 caffeic acid 3-O-methyltransferase [EC:2.1.1.68] | (RefSeq) OMT1; uncharacterized protein LOC103342359	Phenylpropanoid biosynthesis (ko00940)	[R]	General function prediction only	O-methyltransferase domain	Caffeic acid 3-O-methyltransferase OS=Prunus dulcis OX=3755 GN=COMT1 PE=2 SV=1	--	--	unnamed protein product [Prunus armeniaca]
PaF106G0400017578.01	30	29	39	259	240	222	0.880374	0.99823	1.1329	8.3104	7.35934	6.55451	5.33655e-28	2.61971	up	[R]	General function prediction only	Biological Process: mitochondrial respiratory chain complex I assembly (GO:0032981);;	K03070|2.8e-26|pmum:103319773|K03070 preprotein translocase subunit SecA [EC:7.4.2.8] | (RefSeq) protein translocase subunit SECA2, chloroplastic	Protein export (ko03060)	[G]	Carbohydrate transport and metabolism	Complex I intermediate-associated protein 30 (CIA30)	Protein translocase subunit SECA2, chloroplastic OS=Arabidopsis thaliana OX=3702 GN=SECA2 PE=1 SV=1	G	Carbohydrate transport and metabolism	unnamed protein product [Prunus armeniaca]
PaF106G0400016319.01	787	462	365	0	1	0	7.63269	5.44136	3.70121	0	0.006644	0	1.58982e-77	-5.76168	down	--	--	Cellular Component: integral component of membrane (GO:0016021);;	K13466|1.6e-21|vvi:100246778|K13466 EIX receptor 1/2 | (RefSeq) receptor-like protein 12	Plant-pathogen interaction (ko04626)	--	--	Leucine rich repeat	--	T	Signal transduction mechanisms	PREDICTED: tyrosine-sulfated glycopeptide receptor 1-like isoform X1 [Prunus mume]
PaF106G0100002800.01	30	17	35	123	45	95	0.401699	0.259347	0.476706	1.79385	0.697324	1.27023	0.000172445	1.30398	up	[QV]	Secondary metabolites biosynthesis, transport and catabolism;; Defense mechanisms	Molecular Function: monooxygenase activity (GO:0004497);; Molecular Function: iron ion binding (GO:0005506);; Cellular Component: integral component of membrane (GO:0016021);; Molecular Function: oxidoreductase activity, acting on paired donors, with incorporation or reduction of molecular oxygen (GO:0016705);; Molecular Function: heme binding (GO:0020037);;	K23810|3.3e-172|vvi:100232891|K23810 (E)-8-carboxylinalool synthase [EC:1.14.14.-] | (RefSeq) GFH2; ripening-related P-450 enzyme-like	Monoterpenoid biosynthesis (ko00902)	[Q]	Secondary metabolites biosynthesis, transport and catabolism	Cytochrome P450	Geraniol 8-hydroxylase OS=Catharanthus roseus OX=4058 GN=CYP76B6 PE=1 SV=1	Q	Secondary metabolites biosynthesis, transport and catabolism	PREDICTED: geraniol 8-hydroxylase-like [Prunus mume]
PaF106G0200009439.01	96	61	135	217	216	169	1.45684	1.10346	2.12805	3.6074	3.85955	2.58172	0.000221209	1.00203	up	[I]	Lipid transport and metabolism	Molecular Function: 3-hydroxyisobutyryl-CoA hydrolase activity (GO:0003860);; Biological Process: valine catabolic process (GO:0006574);;	K05605|1.9e-217|pmum:103332314|K05605 3-hydroxyisobutyryl-CoA hydrolase [EC:3.1.2.4] | (RefSeq) 3-hydroxyisobutyryl-CoA hydrolase 1-like	Valine, leucine and isoleucine degradation (ko00280);; beta-Alanine metabolism (ko00410);; Propanoate metabolism (ko00640);; Carbon metabolism (ko01200)	--	--	Enoyl-CoA hydratase/isomerase	3-hydroxyisobutyryl-CoA hydrolase 1 OS=Arabidopsis thaliana OX=3702 GN=CHY1 PE=1 SV=1	I	Lipid transport and metabolism	PREDICTED: 3-hydroxyisobutyryl-CoA hydrolase 1-like [Prunus mume]
PaF106G0700028825.01	986	958	1206	439	385	505	21.2508	25.305	27.007	12.7708	10.6245	13.2664	2.16176e-17	-1.12741	down	--	--	Molecular Function: structural constituent of ribosome (GO:0003735);; Cellular Component: mitochondrion (GO:0005739);; Biological Process: translation (GO:0006412);; Cellular Component: small ribosomal subunit (GO:0015935);;	K02946|9.4e-45|mdm:103436347|K02946 small subunit ribosomal protein S10 | (RefSeq) uncharacterized protein LOC103436347	Ribosome (ko03010)	--	--	Ribosomal protein S10p/S20e	Ribosomal protein S10, mitochondrial OS=Pisum sativum OX=3888 GN=RPS10 PE=2 SV=1	J	Translation, ribosomal structure and biogenesis	hypothetical protein PRUPE_7G030100 [Prunus persica]
PaF106G0100000568.01	157	152	213	657	581	570	2.82704	3.28044	3.97078	12.9357	12.2734	10.3194	7.86399e-24	1.77498	up	[R]	General function prediction only	Molecular Function: acid phosphatase activity (GO:0003993);;	K20728|1.5e-43|thj:104814965|K20728 vegetative storage protein 2 | (RefSeq) vegetative storage protein 2-like	MAPK signaling pathway - plant (ko04016)	--	--	HAD superfamily, subfamily IIIB (Acid phosphatase)	Acid phosphatase 1 OS=Solanum lycopersicum OX=4081 GN=APS1 PE=2 SV=1	S	Function unknown	unnamed protein product [Prunus armeniaca]
PaF106G0100004447.01	433	366	469	711	974	1121	7.63603	7.73347	8.51691	13.6981	20.128	19.8417	1.76901e-14	1.17725	up	[I]	Lipid transport and metabolism	Molecular Function: S-adenosylmethionine-dependent methyltransferase activity (GO:0008757);; Biological Process: methylation (GO:0032259);;	K08241|2.5e-209|pmum:103320875|K08241 jasmonate O-methyltransferase [EC:2.1.1.141] | (RefSeq) jasmonate O-methyltransferase-like	alpha-Linolenic acid metabolism (ko00592)	--	--	SAM dependent carboxyl methyltransferase	Jasmonate O-methyltransferase OS=Brassica rapa subsp. pekinensis OX=51351 GN=JMT PE=1 SV=1	S	Function unknown	PREDICTED: jasmonate O-methyltransferase-like [Prunus mume]
PaF106G0800030463.01	0	3	4	403	455	521	0	0.04116	0.055448	6.8792	9.12929	8.9329	4.58966e-91	5.6667	up	--	--	Biological Process: regulation of transcription from RNA polymerase II promoter (GO:0006357);; Molecular Function: cyclin-dependent protein serine/threonine kinase regulator activity (GO:0016538);; Cellular Component: host cell nucleus (GO:0042025);;	K06634|1.7e-57|pmum:103334781|K06634 cyclin H | (RefSeq) cyclin-H1-1-like	Basal transcription factors (ko03022);; Nucleotide excision repair (ko03420)	[DKL]	Cell cycle control, cell division, chromosome partitioning;; Transcription;; Replication, recombination and repair	Cyclin, N-terminal domain	Cyclin-H1-1 OS=Arabidopsis thaliana OX=3702 GN=CYCH1-1 PE=1 SV=1	--	--	hypothetical protein PRUPE_6G323600 [Prunus persica]
PaF106G0400015900.01	28764	26913	29516	846	1351	1376	294.878	329.871	311.681	9.43889	16.1355	14.1089	4.44358e-235	-4.33668	down	--	--	Molecular Function: magnesium ion binding (GO:0000287);; Molecular Function: terpene synthase activity (GO:0010333);;	K15803|0.0e+00|pmum:103343924|K15803 (-)-germacrene D synthase [EC:4.2.3.75] | (RefSeq) (-)-alpha-pinene synthase-like	Sesquiterpenoid and triterpenoid biosynthesis (ko00909)	--	--	Terpene synthase family, metal binding domain	(-)-alpha-pinene synthase OS=Fragaria vesca OX=57918 PE=1 SV=2	S	Function unknown	PREDICTED: (-)-alpha-pinene synthase-like [Prunus mume]
PaF106G0300013018.01	181	123	154	45	22	27	10.8956	8.57504	9.63271	2.76867	1.60484	1.67963	2.20308e-10	-1.80956	down	--	--	Molecular Function: transaminase activity (GO:0008483);; Cellular Component: integral component of membrane (GO:0016021);; Molecular Function: pyridoxal phosphate binding (GO:0030170);;	K19562|2.0e-12|mesc:110617283|K19562 bifunctional dethiobiotin synthetase / adenosylmethionine---8-amino-7-oxononanoate aminotransferase [EC:6.3.3.3 2.6.1.62] | (RefSeq) bifunctional dethiobiotin synthetase/7,8-diamino-pelargonic acid aminotransferase, mitochondrial isoform X1	Biotin metabolism (ko00780)	[E]	Amino acid transport and metabolism	--	Bifunctional dethiobiotin synthetase/7,8-diamino-pelargonic acid aminotransferase, mitochondrial OS=Arabidopsis thaliana OX=3702 GN=BIO3-BIO1 PE=1 SV=1	E	Amino acid transport and metabolism	Bifunctional dethiobiotin synthetase/7,8-diamino-pelargonic acid aminotransferase, mitochondrial [Vitis vinifera]
PaF106G0100005093.01	26	19	18	153	288	290	1.23788	1.06902	0.865745	7.96575	16.0528	13.8783	8.0042e-28	3.00574	up	--	--	Molecular Function: calcium ion binding (GO:0005509);;	K13448|4.5e-06|thj:104805610|K13448 calcium-binding protein CML | (RefSeq) calcium-binding protein CML24-like	Plant-pathogen interaction (ko04626)	--	--	EF-hand domain	--	S	Function unknown	unnamed protein product [Prunus armeniaca]
PaF106G0100006316.01	51	91	50	23	11	16	0.72231	1.54784	0.726374	0.356256	0.180832	0.22704	0.000453681	-1.28736	down	--	--	Molecular Function: UDP-glycosyltransferase activity (GO:0008194);;	K22845|4.3e-105|pmum:103319329|K22845 phlorizin synthase [EC:2.4.1.357] | (RefSeq) UDP-glycosyltransferase 88F3-like	Flavonoid biosynthesis (ko00941)	[GC]	Carbohydrate transport and metabolism;; Energy production and conversion	--	UDP-glycosyltransferase 88F5 OS=Malus domestica OX=3750 GN=UGT88F5 PE=2 SV=1	--	--	unnamed protein product [Prunus armeniaca]
PaF106G0200008357.01	26	12	23	172	159	163	0.154925	0.08375	0.138361	1.12104	1.11006	0.974214	4.58548e-22	2.61775	up	[R]	General function prediction only	Biological Process: signal transduction (GO:0007165);; Molecular Function: ADP binding (GO:0043531);;	K00695|2.9e-115|mtr:MTR_6g478030|K00695 sucrose synthase [EC:2.4.1.13] | (RefSeq) sucrose synthase	Starch and sucrose metabolism (ko00500)	--	--	TIR domain	Disease resistance protein RUN1 OS=Vitis rotundifolia OX=103349 GN=RUN1 PE=1 SV=1	S	Function unknown	TMV resistance protein N isoform X1 [Prunus persica]
PaF106G0600022361.01	377	361	295	146	151	138	2.21553	2.53771	1.7833	0.929534	1.03415	0.807329	4.08383e-08	-1.07586	down	--	--	Biological Process: signal transduction (GO:0007165);; Molecular Function: ADP binding (GO:0043531);;	K16225|2.6e-20|csat:104760397|K16225 probable WRKY transcription factor 52 | (RefSeq) disease resistance protein RRS1-like	Plant-pathogen interaction (ko04626)	--	--	--	Disease resistance protein RUN1 OS=Vitis rotundifolia OX=103349 GN=RUN1 PE=1 SV=1	S	Function unknown	TMV resistance protein N-like [Prunus avium]
PaF106G0200007152.01	145	109	170	288	384	382	3.42526	3.0659	4.14571	7.42115	10.6197	9.0638	6.03898e-11	1.30549	up	--	--	Cellular Component: apoplast (GO:0048046);;	K01870|4.8e-41|csat:104723377|K01870 isoleucyl-tRNA synthetase [EC:6.1.1.5] | (RefSeq) isoleucine--tRNA ligase, chloroplastic/mitochondrial-like	Aminoacyl-tRNA biosynthesis (ko00970)	--	--	Dirigent-like protein	Dirigent protein 23 OS=Arabidopsis thaliana OX=3702 GN=DIR23 PE=2 SV=1	S	Function unknown	unnamed protein product [Prunus armeniaca]
PaF106G0600024041.01	312	296	201	39	78	40	5.62729	6.38647	3.73242	0.761956	1.64355	0.706301	1.82644e-11	-1.88627	down	[G]	Carbohydrate transport and metabolism	Molecular Function: zinc ion binding (GO:0008270);; Biological Process: lignin biosynthetic process (GO:0009809);; Molecular Function: oxidoreductase activity, acting on the CH-OH group of donors, NAD or NADP as acceptor (GO:0016616);; Molecular Function: cinnamyl-alcohol dehydrogenase activity (GO:0045551);;	K23232|1.9e-158|nau:109215604|K23232 8-hydroxygeraniol dehydrogenase [EC:1.1.1.324] | (RefSeq) 8-hydroxygeraniol dehydrogenase-like	Monoterpenoid biosynthesis (ko00902)	[Q]	Secondary metabolites biosynthesis, transport and catabolism	Alcohol dehydrogenase GroES-like domain	Probable mannitol dehydrogenase OS=Fragaria ananassa OX=3747 GN=CAD PE=2 SV=1	Q	Secondary metabolites biosynthesis, transport and catabolism	PREDICTED: probable mannitol dehydrogenase isoform X1 [Prunus mume]
Prunus_sibirica_newGene_1860	95	78	45	21	4	5	1.29373	1.26042	0.622093	0.311064	0.060686	0.054832	1.78804e-05	-1.63465	down	--	--	--	K08081|8.4e-14|thj:104827446|K08081 tropinone reductase I [EC:1.1.1.206] | (RefSeq) tropinone reductase homolog At5g06060-like	Tropane, piperidine and pyridine alkaloid biosynthesis (ko00960)	--	--	C2H2-type zinc finger	Transcriptional regulator SUPERMAN OS=Arabidopsis thaliana OX=3702 GN=SUP PE=1 SV=1	S	Function unknown	unnamed protein product [Prunus armeniaca]
PaF106G0200009605.01	498	379	370	173	156	177	8.91596	7.67926	6.99579	3.2275	3.23978	3.17073	1.30326e-11	-1.14477	down	[J]	Translation, ribosomal structure and biogenesis	Molecular Function: RNA binding (GO:0003723);;	K12741|1.4e-17|ppp:112291379|K12741 heterogeneous nuclear ribonucleoprotein A1/A3 | (RefSeq) UBP1-associated protein 2C-like	Spliceosome (ko03040)	[R]	General function prediction only	RNA recognition motif. (a.k.a. RRM, RBD, or RNP domain)	Probable RNA-binding protein ARP1 OS=Arabidopsis thaliana OX=3702 GN=ARP1 PE=2 SV=1	A	RNA processing and modification	unnamed protein product [Prunus armeniaca]
PaF106G0400015293.01	54	40	45	0	0	0	0.501583	0.447598	0.428898	0	0	0	9.14333e-13	-2.69652	down	--	--	Molecular Function: cysteine-type peptidase activity (GO:0008234);;	K12235|6.5e-14|pavi:110763563|K12235 serine racemase [EC:5.1.1.18] | (RefSeq) uncharacterized protein LOC110763563 isoform X1	Glycine, serine and threonine metabolism (ko00260)	--	--	Ulp1 protease family, C-terminal catalytic domain	--	S	Function unknown	PREDICTED: PRUPE_6G193600, partial [Prunus dulcis]
PaF106G0300010966.01	257	226	179	561	446	399	3.44261	3.57471	2.45052	8.21386	7.03085	5.42855	7.42687e-08	1.09768	up	[T]	Signal transduction mechanisms	Molecular Function: protein serine/threonine kinase activity (GO:0004674);; Molecular Function: ATP binding (GO:0005524);;	K13430|9.4e-231|pmum:103330394|K13430 serine/threonine-protein kinase PBS1 [EC:2.7.11.1] | (RefSeq) serine/threonine-protein kinase PBS1	Plant-pathogen interaction (ko04626)	[T]	Signal transduction mechanisms	Protein kinase domain	Serine/threonine-protein kinase PBS1 OS=Arabidopsis thaliana OX=3702 GN=PBS1 PE=1 SV=1	T	Signal transduction mechanisms	unnamed protein product [Prunus armeniaca]
PaF106G0200008088.01	145	112	91	11	12	16	1.35683	1.24567	0.874018	0.109719	0.122307	0.142685	6.83874e-15	-2.39304	down	--	--	Cellular Component: integral component of membrane (GO:0016021);;	K13466|4.8e-23|cit:102619059|K13466 EIX receptor 1/2 | (RefSeq) receptor-like protein EIX2	Plant-pathogen interaction (ko04626)	--	--	Leucine rich repeat	Tyrosine-sulfated glycopeptide receptor 1 OS=Arabidopsis thaliana OX=3702 GN=PSY1R PE=1 SV=1	T	Signal transduction mechanisms	receptor-like protein 3 [Prunus dulcis]
PaF106G0600024407.01	201	144	174	25	22	22	3.26364	2.79998	2.91398	0.428688	0.404389	0.358349	2.09802e-20	-2.4051	down	[P]	Inorganic ion transport and metabolism	Biological Process: response to reactive oxygen species (GO:0000302);; Molecular Function: peroxidase activity (GO:0004601);; Cellular Component: cytosol (GO:0005829);; Cellular Component: chloroplast (GO:0009507);; Molecular Function: heme binding (GO:0020037);; Biological Process: cellular response to oxidative stress (GO:0034599);; Biological Process: hydrogen peroxide catabolic process (GO:00…	K00434|4.9e-145|pper:18772001|K00434 L-ascorbate peroxidase [EC:1.11.1.11] | (RefSeq) L-ascorbate peroxidase 2, cytosolic	Ascorbate and aldarate metabolism (ko00053);; Glutathione metabolism (ko00480)	--	--	Peroxidase	L-ascorbate peroxidase 2, cytosolic OS=Arabidopsis thaliana OX=3702 GN=APX2 PE=2 SV=3	C	Energy production and conversion	unnamed protein product [Prunus armeniaca]
PaF106G0300012493.01	5	8	0	118	121	146	0.044815	0.091345	0	1.29424	1.41875	1.46916	4.15635e-26	3.43981	up	--	--	--	K13457|7.4e-10|gmx:100809266|K13457 disease resistance protein RPM1 | (RefSeq) disease resistance protein RPM1	Plant-pathogen interaction (ko04626)	--	--	--	Putative disease resistance RPP13-like protein 3 OS=Arabidopsis thaliana OX=3702 GN=RPP13L3 PE=3 SV=1	S	Function unknown	disease resistance RPP13-like protein 4 [Prunus persica]
PaF106G0100001357.01	2064	1953	2359	5478	4213	4280	31.487	35.6682	37.1061	90.957	75.0386	65.3692	2.27923e-19	1.18786	up	[IR]	Lipid transport and metabolism;; General function prediction only	Molecular Function: hydrolase activity, acting on ester bonds (GO:0016788);;	K00679|1.6e-51|cic:CICLE_v10027727mg|K00679 phospholipid:diacylglycerol acyltransferase [EC:2.3.1.158] | (RefSeq) hypothetical protein	Glycerolipid metabolism (ko00561)	--	--	GDSL-like Lipase/Acylhydrolase	GDSL esterase/lipase At4g16230 OS=Arabidopsis thaliana OX=3702 GN=At4g16230 PE=3 SV=2	I	Lipid transport and metabolism	PREDICTED: GDSL esterase/lipase At4g16230-like [Prunus mume]
PaF106G0600025211.01	588	424	500	197	134	147	8.57103	7.38963	7.52074	3.12827	2.27413	2.14479	2.00247e-15	-1.46052	down	--	--	Cellular Component: chloroplast stroma (GO:0009570);; Cellular Component: integral component of membrane (GO:0016021);; Molecular Function: hydrolase activity, acting on ester bonds (GO:0016788);;	K01206|2.0e-72|csat:104750593|K01206 alpha-L-fucosidase [EC:3.2.1.51] | (RefSeq) alpha-L-fucosidase 3-like	Other glycan degradation (ko00511)	--	--	GDSL-like Lipase/Acylhydrolase	GDSL esterase/lipase At1g09390 OS=Arabidopsis thaliana OX=3702 GN=At1g09390 PE=2 SV=1	S	Function unknown	PREDICTED: GDSL esterase/lipase At1g09390-like [Prunus mume]
PaF106G0700027641.01	4578	4893	4851	1870	1538	2374	28.9396	37.31	32.376	12.7922	11.4196	15.104	6.82506e-26	-1.21147	down	--	--	Molecular Function: ATP binding (GO:0005524);; Molecular Function: 1-phosphatidylinositol-4-phosphate 5-kinase activity (GO:0016308);;	K00889|0.0e+00|pmum:103339801|K00889 1-phosphatidylinositol-4-phosphate 5-kinase [EC:2.7.1.68] | (RefSeq) phosphatidylinositol 4-phosphate 5-kinase 9	Inositol phosphate metabolism (ko00562);; Phosphatidylinositol signaling system (ko04070);; Endocytosis (ko04144)	[T]	Signal transduction mechanisms	Phosphatidylinositol-4-phosphate 5-Kinase	Phosphatidylinositol 4-phosphate 5-kinase 9 OS=Arabidopsis thaliana OX=3702 GN=PIP5K9 PE=1 SV=2	T	Signal transduction mechanisms	unnamed protein product [Prunus armeniaca]
PaF106G0400016578.01	126	165	111	0	0	0	1.48607	2.33572	1.34468	0	0	0	2.34685e-32	-4.10534	down	--	--	Molecular Function: transferase activity, transferring acyl groups other than amino-acyl groups (GO:0016747);;	K13065|7.6e-149|pmum:103325765|K13065 shikimate O-hydroxycinnamoyltransferase [EC:2.3.1.133] | (RefSeq) BAHD acyltransferase At5g47980-like	Phenylpropanoid biosynthesis (ko00940);; Flavonoid biosynthesis (ko00941);; Stilbenoid, diarylheptanoid and gingerol biosynthesis (ko00945)	--	--	Transferase family	BAHD acyltransferase At5g47980 OS=Arabidopsis thaliana OX=3702 GN=BAHD1 PE=2 SV=1	S	Function unknown	PREDICTED: BAHD acyltransferase At5g47980-like [Prunus mume]
PaF106G0100003953.01	195	230	250	92	71	116	2.1372	3.02261	2.83726	1.10027	0.900696	1.27473	2.19313e-06	-1.09085	down	[R]	General function prediction only	Molecular Function: protein binding (GO:0005515);;	K12116|0.0e+00|pper:18788531|K12116 flavin-binding kelch repeat F-box protein 1 | (RefSeq) adagio protein 3	Circadian rhythm - plant (ko04712)	--	--	Galactose oxidase, central domain	Adagio protein 3 OS=Arabidopsis thaliana OX=3702 GN=ADO3 PE=1 SV=1	T	Signal transduction mechanisms	unnamed protein product [Prunus armeniaca]
PaF106G0200007072.01	460	348	424	738	729	997	2.62864	1.63102	1.72373	5.64013	3.33505	3.93819	6.53684e-17	1.05261	up	[R]	General function prediction only	Biological Process: defense response (GO:0006952);; Molecular Function: ADP binding (GO:0043531);;	K12818|1.9e-158|mtr:MTR_0267s0070|K12818 ATP-dependent RNA helicase DHX8/PRP22 [EC:3.6.4.13] | (RefSeq) NB-ARC domain disease resistance protein, putative	Spliceosome (ko03040)	[T]	Signal transduction mechanisms	NB-ARC domain	Putative disease resistance RPP13-like protein 1 OS=Arabidopsis thaliana OX=3702 GN=RPPL1 PE=3 SV=1	T	Signal transduction mechanisms	putative disease resistance RPP13-like protein 1 [Prunus dulcis]
PaF106G0200010082.01	1171	901	789	156	92	206	22.0625	19.1037	14.7466	3.37931	2.11246	3.78317	6.28642e-36	-2.39767	down	--	--	Molecular Function: peroxidase activity (GO:0004601);; Cellular Component: extracellular region (GO:0005576);; Biological Process: response to oxidative stress (GO:0006979);; Molecular Function: heme binding (GO:0020037);; Biological Process: hydrogen peroxide catabolic process (GO:0042744);; Molecular Function: metal ion binding (GO:0046872);;	K00430|2.0e-110|pmum:103332863|K00430 peroxidase [EC:1.11.1.7] | (RefSeq) peroxidase 4-like	Phenylpropanoid biosynthesis (ko00940)	--	--	Peroxidase	Peroxidase 4 OS=Vitis vinifera OX=29760 GN=GSVIVT00023967001 PE=1 SV=1	T	Signal transduction mechanisms	PREDICTED: peroxidase 4-like [Prunus mume]
Prunus_sibirica_newGene_1975	187	207	250	485	495	617	1.9114	2.23872	2.31779	7.90381	9.25751	10.1501	1.39486e-15	1.31691	up	[R]	General function prediction only	Biological Process: signal transduction (GO:0007165);; Molecular Function: ADP binding (GO:0043531);;	K00695|3.8e-47|mtr:MTR_6g478030|K00695 sucrose synthase [EC:2.4.1.13] | (RefSeq) sucrose synthase	Starch and sucrose metabolism (ko00500)	--	--	NB-ARC domain	Disease resistance protein RPV1 OS=Vitis rotundifolia OX=103349 GN=RPV1 PE=1 SV=1	T	Signal transduction mechanisms	TMV resistance protein N isoform X2 [Prunus persica]
PaF106G0300013802.01	219	201	183	482	505	674	2.64555	2.90828	2.28403	6.34912	7.13613	8.17983	1.14874e-21	1.47072	up	--	--	Biological Process: protein transport (GO:0015031);;	K19476|8.5e-249|pmum:103327924|K19476 vacuolar protein sorting-associated protein IST1 | (RefSeq) uncharacterized protein LOC103327924	Endocytosis (ko04144)	[Z]	Cytoskeleton	Regulator of Vps4 activity in the MVB pathway	--	Z	Cytoskeleton	unnamed protein product [Prunus armeniaca]
PaF106G0800030449.01	93	88	97	232	290	324	0.482718	0.546267	0.52161	1.32044	1.76863	1.69636	3.98662e-15	1.56191	up	[R]	General function prediction only	Biological Process: signal transduction (GO:0007165);; Molecular Function: ADP binding (GO:0043531);;	K00695|1.3e-103|mtr:MTR_6g478030|K00695 sucrose synthase [EC:2.4.1.13] | (RefSeq) sucrose synthase	Starch and sucrose metabolism (ko00500)	--	--	TIR domain	TMV resistance protein N OS=Nicotiana glutinosa OX=35889 GN=N PE=1 SV=1	T	Signal transduction mechanisms	PREDICTED: disease resistance protein TAO1-like isoform X1 [Prunus mume]
PaF106G0400016908.01	63	59	80	8	10	11	0.422222	0.474378	0.556211	0.055766	0.072344	0.070273	1.74477e-08	-1.93246	down	--	--	Cellular Component: integral component of membrane (GO:0016021);;	K13466|2.2e-42|pxb:103943541|K13466 EIX receptor 1/2 | (RefSeq) probable leucine-rich repeat receptor-like protein kinase At5g63930	Plant-pathogen interaction (ko04626)	[R]	General function prediction only	Leucine rich repeat	Receptor-like protein 43 OS=Arabidopsis thaliana OX=3702 GN=RLP43 PE=2 SV=1	S	Function unknown	receptor-like protein EIX2 [Prunus dulcis]
PaF106G0600023946.01	33	31	33	91	110	99	0.264731	0.3003	0.268642	0.823122	1.06174	0.820485	5.54235e-07	1.43677	up	[R]	General function prediction only	Biological Process: defense response (GO:0006952);; Molecular Function: ADP binding (GO:0043531);;	K13457|0.0e+00|pmum:103334422|K13457 disease resistance protein RPM1 | (RefSeq) disease resistance protein RPM1-like	Plant-pathogen interaction (ko04626)	[T]	Signal transduction mechanisms	NB-ARC domain	Disease resistance protein RPM1 OS=Arabidopsis thaliana OX=3702 GN=RPM1 PE=1 SV=1	T	Signal transduction mechanisms	PREDICTED: disease resistance protein RPM1-like [Prunus mume]
PaF106G0100005527.01	880	558	739	160	202	224	16.1761	14.682	15.9913	3.3065	4.39668	4.19456	2.96211e-26	-1.70692	down	--	--	Cellular Component: integral component of membrane (GO:0016021);;	K12472|7.2e-30|cqi:110701739|K12472 epidermal growth factor receptor substrate 15 | (RefSeq) GATA zinc finger domain-containing protein 14-like	Endocytosis (ko04144)	--	--	BURP domain	BURP domain protein RD22 OS=Arabidopsis thaliana OX=3702 GN=RD22 PE=2 SV=1	S	Function unknown	hypothetical protein PRUPE_1G476500 [Prunus persica]
PaF106G0400016816.01	371	158	238	15	0	8	3.89706	1.98606	2.58208	0.163245	0	0.07576	0.00190411	-1.16037	down	--	--	Molecular Function: magnesium ion binding (GO:0000287);; Molecular Function: terpene synthase activity (GO:0010333);;	K14173|0.0e+00|pmum:103325568|K14173 alpha-farnesene synthase [EC:4.2.3.46] | (RefSeq) (E,E)-alpha-farnesene synthase-like	Sesquiterpenoid and triterpenoid biosynthesis (ko00909)	--	--	Terpene synthase family, metal binding domain	(E,E)-alpha-farnesene synthase OS=Malus domestica OX=3750 GN=AFS1 PE=1 SV=2	S	Function unknown	unnamed protein product [Prunus armeniaca]
PaF106G0700028369.01	0	5	0	2307	2068	2810	0	0.01777	0	8.53529	8.2081	9.62021	4.29382e-222	7.97302	up	--	--	Biological Process: signal transduction (GO:0007165);; Molecular Function: ADP binding (GO:0043531);;	K00695|8.2e-89|mtr:MTR_6g478030|K00695 sucrose synthase [EC:2.4.1.13] | (RefSeq) sucrose synthase	Starch and sucrose metabolism (ko00500)	--	--	TIR domain	Disease resistance protein Roq1 OS=Nicotiana benthamiana OX=4100 GN=ROQ1 PE=1 SV=1	S	Function unknown	PREDICTED: disease resistance protein RPS6-like [Prunus mume]
PaF106G0200007851.01	33	49	33	87	80	91	0.418011	0.749893	0.427156	1.20867	1.18748	1.1617	0.00117108	1.00645	up	[J]	Translation, ribosomal structure and biogenesis	Molecular Function: nucleic acid binding (GO:0003676);; Molecular Function: helicase activity (GO:0004386);; Molecular Function: ATP binding (GO:0005524);;	K12818|1.2e-121|pavi:110750032|K12818 ATP-dependent RNA helicase DHX8/PRP22 [EC:3.6.4.13] | (RefSeq) probable pre-mRNA-splicing factor ATP-dependent RNA helicase DEAH5	Spliceosome (ko03040)	[A]	RNA processing and modification	Helicase associated domain (HA2)	Probable pre-mRNA-splicing factor ATP-dependent RNA helicase DEAH5 OS=Arabidopsis thaliana OX=3702 GN=At3g26560 PE=1 SV=2	A	RNA processing and modification	probable pre-mRNA-splicing factor ATP-dependent RNA helicase DEAH5 [Prunus dulcis]
PaF106G0800030462.01	0	0	0	193	326	303	0	0	0	1.3726	2.50062	1.9791	1.30777e-58	5.20166	up	--	--	Molecular Function: nucleotide binding (GO:0000166);; Biological Process: response to reactive oxygen species (GO:0000302);; Biological Process: response to acid chemical (GO:0001101);; Biological Process: immune system process (GO:0002376);; Molecular Function: molecular_function (GO:0003674);; Molecular Function: binding (GO:0005488);; Cellular Component: cellular_component (GO:0005575);; Cellu…	K16226|5.2e-16|bna:106416466|K16226 disease resistance protein RPS4 | (RefSeq) disease resistance protein RPS4-like	Plant-pathogen interaction (ko04626)	--	--	Leucine rich repeat	--	T	Signal transduction mechanisms	Hypothetical predicted protein, partial [Prunus dulcis]
PaF106G0500019567.01	3	2	0	8361	7381	8442	0.016855	0.013153	0	60.9816	57.7371	56.6387	0	9.54311	up	--	--	Molecular Function: nucleic acid binding (GO:0003676);; Biological Process: DNA integration (GO:0015074);; Molecular Function: kinase activity (GO:0016301);;	K12447|7.0e-222|thj:104808371|K12447 UDP-sugar pyrophosphorylase [EC:2.7.7.64] | (RefSeq) uncharacterized protein LOC104808371	Pentose and glucuronate interconversions (ko00040);; Galactose metabolism (ko00052);; Ascorbate and aldarate metabolism (ko00053);; Amino sugar and nucleotide sugar metabolism (ko00520)	[R]	General function prediction only	Reverse transcriptase (RNA-dependent DNA polymerase)	Retrovirus-related Pol polyprotein from transposon RE1 OS=Arabidopsis thaliana OX=3702 GN=RE1 PE=2 SV=1	L	Replication, recombination and repair	wall-associated kinase 2 [Prunus dulcis]
PaF106G0600023687.01	70	94	106	0	6	13	2.75802	4.40899	4.29354	0	0.257591	0.490361	1.46117e-10	-2.33428	down	--	--	Molecular Function: DNA-directed 5'-3' RNA polymerase activity (GO:0003899);; Biological Process: transcription, DNA-templated (GO:0006351);;	K03016|8.2e-79|pavi:110744659|K03016 DNA-directed RNA polymerases I, II, and III subunit RPABC3 | (RefSeq) DNA-directed RNA polymerases II and V subunit 8A-like	RNA polymerase (ko03020)	[K]	Transcription	RNA polymerase Rpb8	DNA-directed RNA polymerases II and V subunit 8A OS=Arabidopsis thaliana OX=3702 GN=NRPB8A PE=1 SV=1	K	Transcription	unnamed protein product [Prunus armeniaca]
PaF106G0700026629.01	210	173	131	38	81	90	2.09616	2.06778	1.34632	0.413047	0.944939	0.893516	0.000495035	-1.0197	down	--	--	Molecular Function: ion channel activity (GO:0005216);; Cellular Component: integral component of membrane (GO:0016021);;	K05391|3.7e-225|pmum:103340676|K05391 cyclic nucleotide gated channel, plant | (RefSeq) cyclic nucleotide-gated ion channel 1-like	Plant-pathogen interaction (ko04626)	[PT]	Inorganic ion transport and metabolism;; Signal transduction mechanisms	Ion transport protein	Cyclic nucleotide-gated ion channel 1 OS=Arabidopsis thaliana OX=3702 GN=CNGC1 PE=1 SV=1	--	--	PREDICTED: cyclic nucleotide-gated ion channel 1-like [Prunus mume]
PaF106G0500019921.01	1418	1305	1593	2746	2950	3265	17.738	19.984	20.6791	37.3893	43.2068	40.9744	2.66739e-30	1.12064	up	[M]	Cell wall/membrane/envelope biogenesis	Molecular Function: RNA binding (GO:0003723);; Molecular Function: UDP-glucose 4-epimerase activity (GO:0003978);; Cellular Component: cytosol (GO:0005829);; Biological Process: galactose metabolic process (GO:0006012);; Biological Process: rRNA processing (GO:0006364);;	K01784|7.2e-203|pmum:103337743|K01784 UDP-glucose 4-epimerase [EC:5.1.3.2] | (RefSeq) UDP-glucose 4-epimerase GEPI48	Galactose metabolism (ko00052);; Amino sugar and nucleotide sugar metabolism (ko00520)	[M]	Cell wall/membrane/envelope biogenesis	GDP-mannose 4,6 dehydratase	UDP-glucose 4-epimerase GEPI48 OS=Cyamopsis tetragonoloba OX=3832 PE=2 SV=1	M	Cell wall/membrane/envelope biogenesis	unnamed protein product [Prunus armeniaca]
PaF106G0100002724.01	694	434	516	1031	1187	1227	8.50971	6.50167	6.55555	13.2735	16.5232	14.7397	2.86709e-16	1.12944	up	--	--	Molecular Function: DNA binding (GO:0003677);; Cellular Component: nucleus (GO:0005634);; Cellular Component: host cell nucleus (GO:0042025);; Molecular Function: metal ion binding (GO:0046872);;	K13415|2.2e-17|mdm:103413440|K13415 protein brassinosteroid insensitive 1 [EC:2.7.10.1 2.7.11.1] | (RefSeq) uncharacterized protein LOC103413440 isoform X1	Plant hormone signal transduction (ko04075)	--	--	SBP domain	Squamosa promoter-binding-like protein 13A OS=Arabidopsis thaliana OX=3702 GN=SPL13A PE=1 SV=1	K	Transcription	unnamed protein product [Prunus armeniaca]
PaF106G0100004783.01	27	36	31	97	53	140	0.788906	1.3906	0.903865	3.15378	1.8118	4.27763	8.19281e-05	1.29198	up	--	--	Molecular Function: transcription factor activity, sequence-specific DNA binding (GO:0003700);; Cellular Component: nucleus (GO:0005634);; Molecular Function: sequence-specific DNA binding (GO:0043565);;	K13424|6.8e-23|gmx:100127397|K13424 WRKY transcription factor 33 | (RefSeq) WRKY62; WRKY transcription factor 62	MAPK signaling pathway - plant (ko04016);; Plant-pathogen interaction (ko04626)	--	--	WRKY DNA -binding domain	Probable WRKY transcription factor 50 OS=Arabidopsis thaliana OX=3702 GN=WRKY50 PE=2 SV=1	K	Transcription	unnamed protein product [Prunus armeniaca]
PaF106G0300012162.01	14458	10367	12508	26071	23372	22817	204.955	175.881	182.909	402.263	386.758	323.85	7.43608e-23	1.03702	up	[G]	Carbohydrate transport and metabolism	Molecular Function: polygalacturonase activity (GO:0004650);; Cellular Component: extracellular region (GO:0005576);; Biological Process: carbohydrate metabolic process (GO:0005975);; Biological Process: cell wall organization (GO:0071555);;	K01213|6.1e-230|pmum:103343817|K01213 galacturan 1,4-alpha-galacturonidase [EC:3.2.1.67] | (RefSeq) exopolygalacturonase-like	Pentose and glucuronate interconversions (ko00040)	--	--	Glycosyl hydrolases family 28	Exopolygalacturonase (Fragment) OS=Oenothera organensis OX=3945 PE=2 SV=1	G	Carbohydrate transport and metabolism	PREDICTED: exopolygalacturonase-like [Prunus mume]
PaF106G0400015116.01	993	809	861	351	423	441	17.4587	17.0247	15.6124	6.7162	8.67887	7.75718	3.94054e-15	-1.00964	down	[F]	Nucleotide transport and metabolism	Cellular Component: peroxisome (GO:0005777);; Cellular Component: plasma membrane (GO:0005886);; Molecular Function: hydrolase activity, acting on glycosyl bonds (GO:0016798);;	K16329|4.2e-187|pmum:103326776|K16329 pseudouridylate synthase [EC:4.2.1.70] | (RefSeq) pseudouridine-5'-phosphate glycosidase isoform X1	Pyrimidine metabolism (ko00240)	[R]	General function prediction only	Indigoidine synthase A like protein	--	Q	Secondary metabolites biosynthesis, transport and catabolism	PREDICTED: pseudouridine-5'-phosphate glycosidase isoform X1 [Prunus mume]
Prunus_sibirica_newGene_1871	295	247	214	0	0	0	2.86235	2.8703	2.144	0	0	0	1.79177e-56	-5.08363	down	--	--	Molecular Function: nucleic acid binding (GO:0003676);; Molecular Function: zinc ion binding (GO:0008270);;	K14503|4.9e-26|mdm:114821340|K14503 brassinosteroid resistant 1/2 | (RefSeq) BES1/BZR1 homolog protein 2-like	Plant hormone signal transduction (ko04075)	--	--	gag-polypeptide of LTR copia-type	--	L	Replication, recombination and repair	hypothetical protein Prudu_008427 [Prunus dulcis]
PaF106G0400016721.01	20	22	18	135	87	153	0.228328	0.293212	0.205042	1.70385	1.18125	1.78005	5.788e-14	2.19854	up	[DPM]	Cell cycle control, cell division, chromosome partitioning;; Inorganic ion transport and metabolism;; Cell wall/membrane/envelope biogenesis	Molecular Function: copper ion binding (GO:0005507);; Cellular Component: extracellular region (GO:0005576);; Molecular Function: oxidoreductase activity (GO:0016491);;	K00423|2.6e-184|mus:103969432|K00423 L-ascorbate oxidase [EC:1.10.3.3] | (RefSeq) L-ascorbate oxidase	Ascorbate and aldarate metabolism (ko00053)	[Q]	Secondary metabolites biosynthesis, transport and catabolism	Multicopper oxidase	L-ascorbate oxidase OS=Cucumis sativus OX=3659 PE=1 SV=1	Q	Secondary metabolites biosynthesis, transport and catabolism	unnamed protein product [Prunus armeniaca]
PaF106G0400014792.01	6	0	7	249	241	274	0.079538	0	0.102588	4.26297	4.42678	4.30532	3.43126e-56	4.5484	up	--	--	Molecular Function: peroxidase activity (GO:0004601);; Cellular Component: extracellular region (GO:0005576);; Biological Process: response to oxidative stress (GO:0006979);; Molecular Function: heme binding (GO:0020037);; Biological Process: hydrogen peroxide catabolic process (GO:0042744);; Molecular Function: metal ion binding (GO:0046872);;	K00430|2.4e-223|pper:18779566|K00430 peroxidase [EC:1.11.1.7] | (RefSeq) putative Peroxidase 48	Phenylpropanoid biosynthesis (ko00940)	--	--	Peroxidase	Putative Peroxidase 48 OS=Arabidopsis thaliana OX=3702 GN=PER48 PE=3 SV=3	Q	Secondary metabolites biosynthesis, transport and catabolism	putative Peroxidase 48 [Prunus persica]
Prunus_sibirica_newGene_2260	110	88	84	315	261	238	1.27271	1.13914	0.837399	3.07096	2.73326	2.31371	9.55463e-12	1.48464	up	--	--	Biological Process: regulation of transcription, DNA-templated (GO:0006355);;	K14558|1.5e-07|cic:CICLE_v10007508mg|K14558 periodic tryptophan protein 2 | (RefSeq) hypothetical protein	Ribosome biogenesis in eukaryotes (ko03008)	[R]	General function prediction only	--	Protein TOPLESS OS=Arabidopsis thaliana OX=3702 GN=TPL PE=1 SV=1	S	Function unknown	PREDICTED: topless-related [Prunus dulcis]
PaF106G0500020358.01	311	259	278	1140	1046	1133	5.10418	4.92185	4.59198	18.7532	18.7623	17.3713	2.77279e-63	2.00559	up	[L]	Replication, recombination and repair	Molecular Function: nuclease activity (GO:0004518);; Molecular Function: protein kinase activity (GO:0004672);; Biological Process: DNA repair (GO:0006281);; Molecular Function: metal ion binding (GO:0046872);; Molecular Function: class I DNA-(apurinic or apyrimidinic site) lyase activity (GO:0140078);;	K01142|9.8e-18|brp:103866025|K01142 exodeoxyribonuclease III [EC:3.1.11.2] | (RefSeq) DNA-(apurinic or apyrimidinic site) lyase, chloroplastic	Base excision repair (ko03410)	[L]	Replication, recombination and repair	Endonuclease/Exonuclease/phosphatase family	DNA-(apurinic or apyrimidinic site) endonuclease OS=Arabidopsis thaliana OX=3702 GN=APE1L PE=1 SV=1	L	Replication, recombination and repair	unnamed protein product [Prunus armeniaca]
PaF106G0800030505.01	276	227	188	26	47	54	5.66701	5.57968	3.98216	0.565578	1.10575	1.0995	1.28683e-15	-2.04424	down	--	--	Cellular Component: integral component of membrane (GO:0016021);;	K00472|1.7e-06|var:108346435|K00472 prolyl 4-hydroxylase [EC:1.14.11.2] | (RefSeq) uncharacterized LOC108346435	Arginine and proline metabolism (ko00330)	--	--	Late embryogenesis abundant protein	--	S	Function unknown	PREDICTED: uncharacterized protein LOC103334887 [Prunus mume]
PaF106G0300011959.01	2787	2627	2923	444	448	559	30.0124	33.8653	32.6206	5.22701	5.69775	6.01964	1.15296e-133	-2.39745	down	--	--	Molecular Function: magnesium ion binding (GO:0000287);; Molecular Function: terpene synthase activity (GO:0010333);;	K18108|1.5e-139|vvi:100855144|K18108 (-)-alpha-terpineol synthase [EC:4.2.3.111] | (RefSeq) (-)-alpha-terpineol synthase	Monoterpenoid biosynthesis (ko00902)	--	--	Terpene synthase family, metal binding domain	Probable terpene synthase 9 OS=Ricinus communis OX=3988 GN=TPS9 PE=3 SV=1	S	Function unknown	PREDICTED: probable terpene synthase 9 [Prunus mume]
PaF106G0800029405.01	41	57	38	1518	1403	1746	0.490768	0.801157	0.456664	19.6666	19.4554	20.8262	4.21239e-213	4.91193	up	--	--	Molecular Function: DNA binding (GO:0003677);; Molecular Function: microtubule motor activity (GO:0003777);; Molecular Function: ATP binding (GO:0005524);; Cellular Component: microtubule (GO:0005874);; Biological Process: microtubule-based movement (GO:0007018);; Molecular Function: microtubule binding (GO:0008017);;	K09487|4.2e-46|pavi:110747063|K09487 heat shock protein 90kDa beta | (RefSeq) endoplasmin homolog	Protein processing in endoplasmic reticulum (ko04141);; Plant-pathogen interaction (ko04626)	[Z]	Cytoskeleton	--	Kinesin-like protein KIN-14E OS=Arabidopsis thaliana OX=3702 GN=KIN14E PE=1 SV=1	Z	Cytoskeleton	PREDICTED: uncharacterized protein LOC103334078 isoform X1 [Prunus mume]
PaF106G0300012392.01	251	190	171	1400	918	1111	3.39777	3.06562	2.37917	20.634	14.5042	15.0576	3.07087e-46	2.43569	up	[QV]	Secondary metabolites biosynthesis, transport and catabolism;; Defense mechanisms	Molecular Function: iron ion binding (GO:0005506);; Cellular Component: membrane (GO:0016020);; Molecular Function: oxidoreductase activity, acting on paired donors, with incorporation or reduction of molecular oxygen, NAD(P)H as one donor, and incorporation of one atom of oxygen (GO:0016709);; Molecular Function: heme binding (GO:0020037);;	K00495|2.8e-240|pmum:103337951|K00495 phenylacetaldehyde oxime monooxygenase [EC:1.14.14.44] | (RefSeq) cytochrome P450 71A1-like	Cyanoamino acid metabolism (ko00460)	[Q]	Secondary metabolites biosynthesis, transport and catabolism	Cytochrome P450	Phenylacetaldehyde oxime monooxygenase CYP71AN24 OS=Prunus mume OX=102107 GN=CYP71AN24 PE=1 SV=1	Q	Secondary metabolites biosynthesis, transport and catabolism	PREDICTED: cytochrome P450 71A1-like [Prunus mume]
PaF106G0800030730.01	1174	1350	1232	2597	3280	3506	49.8106	68.5306	53.9351	119.938	162.476	148.975	6.65649e-25	1.35235	up	[S]	Function unknown	Cellular Component: extracellular space (GO:0005615);;	K13449|1.6e-91|pmum:103334946|K13449 pathogenesis-related protein 1 | (RefSeq) pathogenesis-related protein 1A-like	MAPK signaling pathway - plant (ko04016);; Plant hormone signal transduction (ko04075);; Plant-pathogen interaction (ko04626)	[S]	Function unknown	Cysteine-rich secretory protein family	--	S	Function unknown	PREDICTED: pathogenesis-related protein 1A-like [Prunus mume]
PaF106G0600022161.01	478	266	474	24	15	26	7.39084	4.91579	7.55891	0.397867	0.265695	0.391986	2.10075e-48	-3.57829	down	[G]	Carbohydrate transport and metabolism	Molecular Function: UDP-glycosyltransferase activity (GO:0008194);; Cellular Component: intracellular membrane-bounded organelle (GO:0043231);; Molecular Function: quercetin 3-O-glucosyltransferase activity (GO:0080043);; Molecular Function: quercetin 7-O-glucosyltransferase activity (GO:0080044);;	K13493|1.7e-108|eus:EUTSA_v10013500mg|K13493 cytokinin-N-glucosyltransferase [EC:2.4.1.-] | (RefSeq) hypothetical protein	Zeatin biosynthesis (ko00908)	[GC]	Carbohydrate transport and metabolism;; Energy production and conversion	UDP-glucoronosyl and UDP-glucosyl transferase	UDP-glucose iridoid glucosyltransferase OS=Catharanthus roseus OX=4058 GN=UGT76A2 PE=1 SV=1	--	--	unnamed protein product [Prunus armeniaca]
PaF106G0700027850.01	240	229	285	7	22	20	11.4738	13.1498	14.0935	0.32742	1.21271	0.960613	1.55825e-32	-3.21083	down	[O]	Posttranslational modification, protein turnover, chaperones	Molecular Function: ATP binding (GO:0005524);; Cellular Component: cytoplasm (GO:0005737);; Biological Process: response to unfolded protein (GO:0006986);; Molecular Function: ATPase activity (GO:0016887);; Molecular Function: heat shock protein binding (GO:0031072);; Biological Process: cellular response to unfolded protein (GO:0034620);; Biological Process: protein refolding (GO:0042026);; Mole…	K03283|1.5e-66|pmum:103341778|K03283 heat shock 70kDa protein 1/2/6/8 | (RefSeq) heat shock cognate 70 kDa protein-like	Spliceosome (ko03040);; Protein processing in endoplasmic reticulum (ko04141);; Endocytosis (ko04144)	[O]	Posttranslational modification, protein turnover, chaperones	Hsp70 protein	Heat shock 70 kDa protein 4 OS=Arabidopsis thaliana OX=3702 GN=HSP70-4 PE=1 SV=1	O	Posttranslational modification, protein turnover, chaperones	heat shock cognate 70 kDa protein-like [Prunus dulcis]
PaF106G0600024842.01	68	66	36	174	143	135	0.620246	0.7235	0.33774	1.74628	1.53924	1.24153	7.82634e-06	1.26709	up	[GHR]	Carbohydrate transport and metabolism;; Coenzyme transport and metabolism;; General function prediction only	Molecular Function: magnesium ion binding (GO:0000287);; Molecular Function: carboxy-lyase activity (GO:0016831);; Molecular Function: thiamine pyrophosphate binding (GO:0030976);;	K01568|1.1e-73|fve:101303820|K01568 pyruvate decarboxylase [EC:4.1.1.1] | (RefSeq) pyruvate decarboxylase 2	Glycolysis / Gluconeogenesis (ko00010)	[EH]	Amino acid transport and metabolism;; Coenzyme transport and metabolism	Thiamine pyrophosphate enzyme, C-terminal TPP binding domain	Pyruvate decarboxylase 2 (Fragment) OS=Pisum sativum OX=3888 GN=PDC2 PE=2 SV=1	--	--	PREDICTED: pyruvate decarboxylase 2 [Fragaria vesca subsp. vesca]
PaF106G0200008156.01	33	12	30	170	177	169	0.305029	0.128102	0.287588	1.71851	1.92486	1.57862	2.29391e-18	2.41523	up	--		Molecular Function: protein kinase activity (GO:0004672);; Molecular Function: ATP binding (GO:0005524);; Cellular Component: integral component of membrane (GO:0016021);; Molecular Function: polysaccharide binding (GO:0030247);;	K13416|3.1e-48|ccaj:109804867|K13416 brassinosteroid insensitive 1-associated receptor kinase 1 [EC:2.7.10.1 2.7.11.1] | (RefSeq) BRASSINOSTEROID INSENSITIVE 1-associated receptor kinase 1-like	MAPK signaling pathway - plant (ko04016);; Plant hormone signal transduction (ko04075);; Plant-pathogen interaction (ko04626)	--	--	Protein kinase domain	Rust resistance kinase Lr10 OS=Triticum aestivum OX=4565 GN=LRK10 PE=2 SV=1	T	Signal transduction mechanisms	PREDICTED: LEAF RUST 10 DISEASE-RESISTANCE LOCUS RECEPTOR-LIKE PROTEIN KINASE-like 2.4 [Prunus mume]
PaF106G0100001224.01	33	19	29	171	210	247	0.359362	0.250527	0.324916	2.06223	2.71957	2.7358	1.90812e-26	2.64541	up	[D]	Cell cycle control, cell division, chromosome partitioning	Molecular Function: 5'-nucleotidase activity (GO:0008253);; Molecular Function: metal ion binding (GO:0046872);;	K01081|3.6e-48|gsl:Gasu_60230|K01081 5'-nucleotidase [EC:3.1.3.5] | (RefSeq) 5' nucleotidase family protein	Purine metabolism (ko00230);; Pyrimidine metabolism (ko00240);; Nicotinate and nicotinamide metabolism (ko00760)	[F]	Nucleotide transport and metabolism	5' nucleotidase family	--	F	Nucleotide transport and metabolism	PREDICTED: cytosolic purine 5'-nucleotidase-like [Prunus mume]
PaF106G0800030114.01	58	20	42	199	162	287	1.06828	0.428733	0.785361	3.99592	3.49098	5.31315	4.60906e-15	2.13258	up	[R]	General function prediction only	Molecular Function: protein binding (GO:0005515);; Cellular Component: cellular_component (GO:0005575);; Cellular Component: intracellular (GO:0005622);; Cellular Component: cell (GO:0005623);; Cellular Component: nucleus (GO:0005634);; Cellular Component: nucleoplasm (GO:0005654);; Biological Process: regulation of carbohydrate metabolic process (GO:0006109);; Biological Process: regulation of s…	K14152|3.0e-70|cpep:111783531|K14152 phosphoribosyl-ATP pyrophosphohydrolase / phosphoribosyl-AMP cyclohydrolase / histidinol dehydrogenase [EC:3.6.1.31 3.5.4.19 1.1.1.23] | (RefSeq) uncharacterized protein LOC111783531	Histidine metabolism (ko00340);; Biosynthesis of amino acids (ko01230)	--	--	Tetratricopeptide repeat	Protein SULFUR DEFICIENCY-INDUCED 1 OS=Arabidopsis thaliana OX=3702 GN=SDI1 PE=2 SV=1	S	Function unknown	unnamed protein product [Prunus armeniaca]
PaF106G0600022158.01	614	397	468	96	99	184	7.76236	5.99883	6.098	1.31554	1.45583	2.32136	1.56174e-17	-1.73675	down	[G]	Carbohydrate transport and metabolism	Molecular Function: UDP-glycosyltransferase activity (GO:0008194);; Cellular Component: intracellular membrane-bounded organelle (GO:0043231);; Molecular Function: quercetin 3-O-glucosyltransferase activity (GO:0080043);; Molecular Function: quercetin 7-O-glucosyltransferase activity (GO:0080044);;	K13493|5.4e-110|brp:103846928|K13493 cytokinin-N-glucosyltransferase [EC:2.4.1.-] | (RefSeq) UDP-glycosyltransferase 76C2	Zeatin biosynthesis (ko00908)	[GC]	Carbohydrate transport and metabolism;; Energy production and conversion	UDP-glucoronosyl and UDP-glucosyl transferase	UDP-glucose iridoid glucosyltransferase OS=Catharanthus roseus OX=4058 GN=UGT76A2 PE=1 SV=1	--	--	PREDICTED: UDP-glycosyltransferase 76E2-like isoform X1 [Prunus mume]
PaF106G0200007209.01	445	405	438	101	130	175	3.62263	3.94319	3.67949	0.887328	1.22935	1.42456	2.23439e-16	-1.49123	down	--		Molecular Function: protein kinase activity (GO:0004672);; Molecular Function: ATP binding (GO:0005524);; Cellular Component: integral component of membrane (GO:0016021);;	K13416|2.1e-54|pvu:PHAVU_006G208100g|K13416 brassinosteroid insensitive 1-associated receptor kinase 1 [EC:2.7.10.1 2.7.11.1] | (RefSeq) hypothetical protein	MAPK signaling pathway - plant (ko04016);; Plant hormone signal transduction (ko04075);; Plant-pathogen interaction (ko04626)	[T]	Signal transduction mechanisms	Protein kinase domain	LEAF RUST 10 DISEASE-RESISTANCE LOCUS RECEPTOR-LIKE PROTEIN KINASE-like 2.5 OS=Arabidopsis thaliana OX=3702 GN=LRK10L-2.5 PE=3 SV=1	T	Signal transduction mechanisms	LEAF RUST 10 DISEASE-RESISTANCE LOCUS RECEPTOR-LIKE PROTEIN KINASE-like 2.5 [Prunus dulcis]
PaF106G0100004699.01	83	46	20	230	224	243	10.4862	6.88817	2.54242	31.6199	33.0415	30.7625	1.80201e-10	1.8937	up	--	--	Cellular Component: integral component of membrane (GO:0016021);;	K00784|9.9e-11|mcha:111016700|K00784 ribonuclease Z [EC:3.1.26.11] | (RefSeq) tRNase Z TRZ3, mitochondrial isoform X1	RNA transport (ko03013)	[R]	General function prediction only	--	tRNAse Z TRZ4, mitochondrial OS=Arabidopsis thaliana OX=3702 GN=TRZ4 PE=2 SV=1	S	Function unknown	hypothetical protein PRUPE_7G044400 [Prunus persica]
PaF106G0700028366.01	0	0	0	63	78	45	0	0	0	0.567683	0.752329	0.368889	5.66808e-17	3.10305	up	--	--	Biological Process: signal transduction (GO:0007165);; Molecular Function: ADP binding (GO:0043531);;	K00695|6.2e-64|mtr:MTR_6g478030|K00695 sucrose synthase [EC:2.4.1.13] | (RefSeq) sucrose synthase	Starch and sucrose metabolism (ko00500)	--	--	NB-ARC domain	TMV resistance protein N OS=Nicotiana glutinosa OX=35889 GN=N PE=1 SV=1	S	Function unknown	PREDICTED: TMV resistance protein N-like [Prunus mume]
PaF106G0800032588.01	0	2	0	329	356	549	0	0.009995	0	2.12865	2.66032	3.51911	8.33801e-80	5.69611	up	--	--	Molecular Function: protein binding (GO:0005515);; Biological Process: signal transduction (GO:0007165);; Molecular Function: ADP binding (GO:0043531);;	K00695|6.2e-141|mtr:MTR_6g478030|K00695 sucrose synthase [EC:2.4.1.13] | (RefSeq) sucrose synthase	Starch and sucrose metabolism (ko00500)	--	--	TIR domain	Disease resistance protein Roq1 OS=Nicotiana benthamiana OX=4100 GN=ROQ1 PE=1 SV=1	T	Signal transduction mechanisms	TMV resistance protein N-like [Prunus avium]
PaF106G0300012867.01	0	4	2	111	131	90	0	0.053435	0.022134	1.3466	1.70698	1.00398	6.97888e-25	3.53673	up	--		Molecular Function: protein kinase activity (GO:0004672);; Molecular Function: ATP binding (GO:0005524);; Molecular Function: polysaccharide binding (GO:0030247);;	K13415|5.8e-33|mus:103980973|K13415 protein brassinosteroid insensitive 1 [EC:2.7.10.1 2.7.11.1] | (RefSeq) systemin receptor SR160-like	Plant hormone signal transduction (ko04075)	[T]	Signal transduction mechanisms	Protein kinase domain	LEAF RUST 10 DISEASE-RESISTANCE LOCUS RECEPTOR-LIKE PROTEIN KINASE-like 2.1 OS=Arabidopsis thaliana OX=3702 GN=LRK10L-2.1 PE=3 SV=1	T	Signal transduction mechanisms	LEAF RUST 10 DISEASE-RESISTANCE LOCUS RECEPTOR-LIKE PROTEIN KINASE-like 2.1 [Prunus avium]
PaF106G0800031260.01	109	62	92	0	0	0	0.641487	0.432686	0.558301	0	0	0	4.73182e-23	-3.54899	down	--	--	Biological Process: signal transduction (GO:0007165);; Molecular Function: ADP binding (GO:0043531);;	K00695|1.1e-162|mtr:MTR_6g478030|K00695 sucrose synthase [EC:2.4.1.13] | (RefSeq) sucrose synthase	Starch and sucrose metabolism (ko00500)	--	--	TIR domain	TMV resistance protein N OS=Nicotiana glutinosa OX=35889 GN=N PE=1 SV=1	T	Signal transduction mechanisms	TMV resistance protein N [Prunus persica]
PaF106G0200009421.01	2492	2347	2545	994	1005	1135	17.4989	19.6103	18.4477	7.71778	8.26935	8.05022	1.83143e-35	-1.13377	down	[G]	Carbohydrate transport and metabolism	Biological Process: carbohydrate metabolic process (GO:0005975);; Molecular Function: pullulanase activity (GO:0051060);;	K01214|7.4e-27|smo:SELMODRAFT_106218|K01214 isoamylase [EC:3.2.1.68] | (RefSeq) hypothetical protein	Starch and sucrose metabolism (ko00500)	[G]	Carbohydrate transport and metabolism	Pullulanase N2 domain	Pullulanase 1, chloroplastic OS=Arabidopsis thaliana OX=3702 GN=PU1 PE=1 SV=2	G	Carbohydrate transport and metabolism	unnamed protein product [Prunus armeniaca]
PaF106G0700028365.01	12	4	10	248	224	275	0.05392	0.019554	0.046874	1.29749	1.25732	1.32307	4.25667e-51	4.04499	up	--	--	Biological Process: signal transduction (GO:0007165);; Molecular Function: ADP binding (GO:0043531);;	K16225|1.9e-64|ath:AT5G45260|K16225 probable WRKY transcription factor 52 | (RefSeq) RRS1; Disease resistance protein (TIR-NBS-LRR class)	Plant-pathogen interaction (ko04626)	--	--	NB-ARC domain	Disease resistance protein Roq1 OS=Nicotiana benthamiana OX=4100 GN=ROQ1 PE=1 SV=1	S	Function unknown	PREDICTED: TMV resistance protein N-like [Prunus mume]
PaF106G0300011625.01	340	191	253	0	0	0	2.56147	1.71924	1.96705	0	0	0	1.31615e-55	-5.06719	down	--		Molecular Function: protein kinase activity (GO:0004672);; Molecular Function: protein serine/threonine kinase activity (GO:0004674);; Molecular Function: ATP binding (GO:0005524);; Cellular Component: plasma membrane (GO:0005886);; Cellular Component: plasmodesma (GO:0009506);; Cellular Component: integral component of membrane (GO:0016021);; Biological Process: protein autophosphorylation (GO:0…	K13435|2.4e-85|sly:101268866|K13435 serine/threonine-protein kinase Pto | (RefSeq) Pto; serine/threonine protein kinase Pto	Plant-pathogen interaction (ko04626)	[T]	Signal transduction mechanisms	Protein tyrosine and serine/threonine kinase	Receptor-like protein kinase FERONIA OS=Arabidopsis thaliana OX=3702 GN=FER PE=1 SV=1	T	Signal transduction mechanisms	PREDICTED: receptor-like protein kinase FERONIA [Prunus mume]
PaF106G0800032790.01	70	84	86	512	522	473	0.485877	0.693666	0.611254	3.87291	4.22806	3.29042	2.90397e-41	2.54555	up	--	--	Biological Process: defense response (GO:0006952);; Molecular Function: ADP binding (GO:0043531);;	K13457|0.0e+00|pper:18767028|K13457 disease resistance protein RPM1 | (RefSeq) disease resistance protein RPM1	Plant-pathogen interaction (ko04626)	[T]	Signal transduction mechanisms	NB-ARC domain	Disease resistance protein RPM1 OS=Arabidopsis thaliana OX=3702 GN=RPM1 PE=1 SV=1	T	Signal transduction mechanisms	putative NBS-LRR type disease resistance protein [Prunus persica]
PaF106G0800030995.01	810	848	631	199	319	407	11.2949	14.1403	9.0766	3.0208	5.18013	5.68247	2.58673e-08	-1.14557	down	--	--	Biological Process: regulation of cyclin-dependent protein serine/threonine kinase activity (GO:0000079);; Cellular Component: cyclin-dependent protein kinase holoenzyme complex (GO:0000307);; Cellular Component: nucleus (GO:0005634);; Cellular Component: cytoplasm (GO:0005737);; Molecular Function: cyclin-dependent protein serine/threonine kinase regulator activity (GO:0016538);; Cellular Compon…	K14505|1.1e-107|pmum:103335336|K14505 cyclin D3, plant | (RefSeq) cyclin-D3-1	Plant hormone signal transduction (ko04075)	[D]	Cell cycle control, cell division, chromosome partitioning	Cyclin, N-terminal domain	Cyclin-D3-1 OS=Arabidopsis thaliana OX=3702 GN=CYCD3-1 PE=1 SV=3	D	Cell cycle control, cell division, chromosome partitioning	PREDICTED: cyclin-D3-1 [Prunus mume]
PaF106G0800029996.01	1358	1060	1008	3748	2956	3131	7.63764	7.17371	5.80019	22.5119	19.1402	17.0808	5.83664e-35	1.57119	up	[V]	Defense mechanisms	Molecular Function: ATP binding (GO:0005524);; Cellular Component: plasma membrane (GO:0005886);; Cellular Component: integral component of membrane (GO:0016021);; Molecular Function: ATPase activity (GO:0016887);; Molecular Function: ATPase activity, coupled to transmembrane movement of substances (GO:0042626);; Biological Process: transmembrane transport (GO:0055085);;	K08712|9.9e-139|gsl:Gasu_29800|K08712 ATP-binding cassette, subfamily G (WHITE), member 2, SNQ2 | (RefSeq) ABC transporter, ATP-binding protein	ABC transporters (ko02010)	[Q]	Secondary metabolites biosynthesis, transport and catabolism	ABC-2 type transporter	Pleiotropic drug resistance protein 1 OS=Nicotiana tabacum OX=4097 GN=PDR1 PE=2 SV=1	Q	Secondary metabolites biosynthesis, transport and catabolism	pleiotropic drug resistance protein 1 isoform X2 [Prunus persica]
Prunus_sibirica_newGene_167	2	0	6	53	58	60	0.016672	0	0.052135	0.578708	0.673782	0.667636	1.14184e-11	2.50658	up	--	--	Cellular Component: DNA-directed RNA polymerase complex (GO:0000428);; Molecular Function: transcription factor activity, protein binding (GO:0000988);; Molecular Function: transcription factor activity, transcription factor binding (GO:0000989);; Molecular Function: transcription factor activity, RNA polymerase II transcription factor binding (GO:0001076);; Molecular Function: RNA polymerase II …	K03125|1.1e-86|pavi:110754021|K03125 transcription initiation factor TFIID subunit 1 [EC:2.3.1.48 2.7.11.1] | (RefSeq) transcription initiation factor TFIID subunit 1-like	Basal transcription factors (ko03022)	--	--	--	--	K	Transcription	unnamed protein product [Prunus armeniaca]
PaF106G0200006844.01	12276	8618	10980	1135	1185	1697	91.2512	76.629	84.5959	9.1045	10.2936	12.5533	2.76182e-162	-2.84268	down	--	--	Molecular Function: oxidoreductase activity, acting on single donors with incorporation of molecular oxygen, incorporation of two atoms of oxygen (GO:0016702);; Biological Process: oxylipin biosynthetic process (GO:0031408);; Molecular Function: metal ion binding (GO:0046872);;	K00454|8.7e-263|pmum:103330561|K00454 lipoxygenase [EC:1.13.11.12] | (RefSeq) linoleate 13S-lipoxygenase 2-1, chloroplastic-like	Linoleic acid metabolism (ko00591);; alpha-Linolenic acid metabolism (ko00592)	--	--	Lipoxygenase	Linoleate 13S-lipoxygenase 2-1, chloroplastic OS=Solanum tuberosum OX=4113 GN=LOX2.1 PE=1 SV=1	E	Amino acid transport and metabolism	unnamed protein product [Prunus armeniaca]
PaF106G0700028640.01	13	0	2	276	189	308	0.174041	0	0.022698	4.0207	2.94826	4.1281	0.000932435	1.22861	up	--	--	Molecular Function: nucleic acid binding (GO:0003676);; Biological Process: DNA integration (GO:0015074);;	K03283|5.5e-24|pavi:110770720|K03283 heat shock 70kDa protein 1/2/6/8 | (RefSeq) heat shock 70 kDa protein 18-like	Spliceosome (ko03040);; Protein processing in endoplasmic reticulum (ko04141);; Endocytosis (ko04144)	[R]	General function prediction only	gag-polypeptide of LTR copia-type	Retrovirus-related Pol polyprotein from transposon RE1 OS=Arabidopsis thaliana OX=3702 GN=RE1 PE=2 SV=1	L	Replication, recombination and repair	hypothetical protein Prudu_489S000400 [Prunus dulcis]
PaF106G0200009348.01	32	33	32	109	113	126	0.577826	0.709176	0.589503	2.17244	2.42741	2.31471	1.34571e-09	1.64097	up	[K]	Transcription	Molecular Function: O-methyltransferase activity (GO:0008171);; Biological Process: methylation (GO:0032259);; Molecular Function: protein dimerization activity (GO:0046983);;	K13066|9.8e-214|pmum:103342357|K13066 caffeic acid 3-O-methyltransferase [EC:2.1.1.68] | (RefSeq) caffeic acid 3-O-methyltransferase-like	Phenylpropanoid biosynthesis (ko00940)	[R]	General function prediction only	O-methyltransferase domain	Caffeic acid 3-O-methyltransferase OS=Catharanthus roseus OX=4058 GN=COMT1 PE=2 SV=1	--	--	unnamed protein product [Prunus armeniaca]
PaF106G0300011417.01	413	358	296	139	156	145	3.15761	3.2735	2.32782	1.15222	1.38756	1.10324	1.36928e-08	-1.10307	down	[T]	Signal transduction mechanisms	Molecular Function: RNA binding (GO:0003723);; Molecular Function: metal ion binding (GO:0046872);;	K14411|1.8e-10|mus:104000436|K14411 RNA-binding protein Musashi | (RefSeq) heterogeneous nuclear ribonucleoprotein 1-like	mRNA surveillance pathway (ko03015)	[R]	General function prediction only	Ankyrin repeats (3 copies)	Heterogeneous nuclear ribonucleoprotein 1 OS=Arabidopsis thaliana OX=3702 GN=RNP1 PE=1 SV=1	S	Function unknown	unnamed protein product [Prunus armeniaca]
PaF106G0700028414.01	992	1025	954	125	97	113	17.606	21.7648	17.4625	2.41335	1.9915	1.99201	3.73898e-81	-2.92474	down	--	--	--	K03097|6.5e-16|aip:107632886|K03097 casein kinase II subunit alpha [EC:2.7.11.1] | (RefSeq) casein kinase II subunit alpha-like isoform X3	Ribosome biogenesis in eukaryotes (ko03008);; Circadian rhythm - plant (ko04712)	--	--	Protein of unknown function (DUF642)	--	S	Function unknown	unnamed protein product [Prunus armeniaca]
PaF106G0800030499.01	286	225	181	474	523	583	2.36599	2.22133	1.55428	4.34814	5.17372	4.99866	1.35346e-12	1.21245	up	[R]	General function prediction only	Biological Process: signal transduction (GO:0007165);; Molecular Function: ADP binding (GO:0043531);;	K00695|6.8e-108|mtr:MTR_6g478030|K00695 sucrose synthase [EC:2.4.1.13] | (RefSeq) sucrose synthase	Starch and sucrose metabolism (ko00500)	--	--	TIR domain	TMV resistance protein N OS=Nicotiana glutinosa OX=35889 GN=N PE=1 SV=1	G	Carbohydrate transport and metabolism	PREDICTED: TMV resistance protein N-like [Prunus mume]
Prunus_sibirica_newGene_1525	0	0	3	622	558	560	0	0	0.031489	11.0514	10.1075	8.72863	1.88282e-103	6.17887	up	--	--	--	K12874|7.2e-43|qsu:112031791|K12874 intron-binding protein aquarius | (RefSeq) LOW QUALITY PROTEIN: intron-binding protein aquarius-like	Spliceosome (ko03040)	[R]	General function prediction only	Reverse transcriptase (RNA-dependent DNA polymerase)	--	L	Replication, recombination and repair	hypothetical protein PRUPE_3G120300 [Prunus persica]
PaF106G0400018230.01	4392	3897	4875	8100	8523	9937	51.7812	54.539	58.8782	106.545	119.744	119.149	1.89243e-36	1.08344	up	[EH]	Amino acid transport and metabolism;; Coenzyme transport and metabolism	Molecular Function: oxidoreductase activity, acting on a sulfur group of donors, disulfide as acceptor (GO:0016671);; Biological Process: sulfate reduction (GO:0019419);;	K05907|3.2e-214|pmum:103324413|K05907 adenylyl-sulfate reductase (glutathione) [EC:1.8.4.9] | (RefSeq) 5'-adenylylsulfate reductase 3, chloroplastic-like	Sulfur metabolism (ko00920)	[E]	Amino acid transport and metabolism	Phosphoadenosine phosphosulfate reductase family	5'-adenylylsulfate reductase 3, chloroplastic OS=Arabidopsis thaliana OX=3702 GN=APR3 PE=2 SV=2	--	--	unnamed protein product [Prunus armeniaca]
PaF106G0800032136.01	90	93	75	0	0	0	5.12325	6.3518	4.38366	0	0	0	2.60551e-23	-3.56491	down	--	--	Biological Process: mitochondrial RNA metabolic process (GO:0000959);; Biological Process: mitochondrial RNA processing (GO:0000963);; Molecular Function: molecular_function (GO:0003674);; Molecular Function: catalytic activity (GO:0003824);; Molecular Function: nuclease activity (GO:0004518);; Molecular Function: endonuclease activity (GO:0004519);; Molecular Function: endoribonuclease activity …	K00784|4.0e-09|mdm:103418985|K00784 ribonuclease Z [EC:3.1.26.11] | (RefSeq) tRNase Z TRZ3, mitochondrial-like isoform X1	RNA transport (ko03013)	[R]	General function prediction only	--	tRNAse Z TRZ4, mitochondrial OS=Arabidopsis thaliana OX=3702 GN=TRZ4 PE=2 SV=1	S	Function unknown	PREDICTED: (+)-neomenthol dehydrogenase, partial [Prunus dulcis]
PaF106G0100002410.01	246	260	165	0	0	0	9.21943	11.6991	6.38025	0	0	0	8.94931e-48	-4.79815	down	--	--	--	K14290|9.7e-19|pavi:110749577|K14290 exportin-1 | (RefSeq) protein EXPORTIN 1A	Ribosome biogenesis in eukaryotes (ko03008);; RNA transport (ko03013)	[YU]	Nuclear structure;; Intracellular trafficking, secretion, and vesicular transport	Unc-13 homolog	Protein EXPORTIN 1A OS=Arabidopsis thaliana OX=3702 GN=XPO1 PE=1 SV=1	--	--	unnamed protein product [Prunus armeniaca]
PaF106G0200009658.01	12	10	20	374	453	515	0.122183	0.127797	0.214065	4.40999	5.78363	5.66977	4.30844e-78	4.42029	up	--	--	Molecular Function: protein kinase activity (GO:0004672);; Molecular Function: ATP binding (GO:0005524);; Cellular Component: integral component of membrane (GO:0016021);;	K05391|4.6e-188|pmum:103322391|K05391 cyclic nucleotide gated channel, plant | (RefSeq) cyclic nucleotide-gated ion channel 1-like	Plant-pathogen interaction (ko04626)	[PT]	Inorganic ion transport and metabolism;; Signal transduction mechanisms	Ion transport protein	Cyclic nucleotide-gated ion channel 1 OS=Arabidopsis thaliana OX=3702 GN=CNGC1 PE=1 SV=1	--	--	cyclic nucleotide-gated ion channel 1 [Prunus persica]
PaF106G0500021223.01	194	109	81	7	6	11	3.08486	2.07375	1.32859	0.11953	0.100259	0.163315	5.25348e-17	-2.77724	down	--	--	Molecular Function: DNA binding (GO:0003677);; Cellular Component: nucleus (GO:0005634);;	K14292|1.1e-21|cann:107850838|K14292 trimethylguanosine synthase [EC:2.1.1.-] | (RefSeq) uncharacterized LOC107850838	RNA transport (ko03013)	--	--	Homeodomain	WUSCHEL-related homeobox 1 OS=Arabidopsis thaliana OX=3702 GN=WOX1 PE=2 SV=2	K	Transcription	unnamed protein product [Prunus armeniaca]
PaF106G0100004010.01	215	80	172	258	326	385	3.30152	1.46957	2.71522	4.31287	5.84666	5.91581	4.2653e-05	1.02906	up	[Q]	Secondary metabolites biosynthesis, transport and catabolism	Molecular Function: D-galacturonate reductase activity (GO:0102098);;	K19642|3.9e-179|pmum:103320996|K19642 D-galacturonate reductase [EC:1.1.1.365] | (RefSeq) D-galacturonate reductase-like	Ascorbate and aldarate metabolism (ko00053)	[R]	General function prediction only	Aldo/keto reductase family	D-galacturonate reductase OS=Fragaria ananassa OX=3747 GN=GALUR PE=1 SV=1	S	Function unknown	unnamed protein product [Prunus armeniaca]
PaF106G0800031288.01	451	304	344	120	84	113	2.79437	2.25317	2.19534	0.809342	0.60147	0.695677	3.40038e-16	-1.57742	down	[R]	General function prediction only	Biological Process: signal transduction (GO:0007165);; Cellular Component: integral component of membrane (GO:0016021);; Molecular Function: ADP binding (GO:0043531);;	K00695|2.0e-174|mtr:MTR_6g478030|K00695 sucrose synthase [EC:2.4.1.13] | (RefSeq) sucrose synthase	Starch and sucrose metabolism (ko00500)	--	--	TIR domain	TMV resistance protein N OS=Nicotiana glutinosa OX=35889 GN=N PE=1 SV=1	T	Signal transduction mechanisms	TMV resistance protein N-like, partial [Prunus avium]
PaF106G0400016135.01	178	147	166	5	14	14	2.66733	2.62131	2.55895	0.066944	0.236047	0.206482	2.25321e-25	-3.03111	down	[W]	Extracellular structures	Molecular Function: protein kinase activity (GO:0004672);; Molecular Function: ATP binding (GO:0005524);; Molecular Function: carbohydrate binding (GO:0030246);;	K22133|4.5e-49|egr:104443803|K22133 oxalate---CoA ligase [EC:6.2.1.8] | (RefSeq) oxalate--CoA ligase isoform X2	Glyoxylate and dicarboxylate metabolism (ko00630)	--	--	Protein kinase domain	L-type lectin-domain containing receptor kinase IX.1 OS=Arabidopsis thaliana OX=3702 GN=LECRK91 PE=1 SV=1	T	Signal transduction mechanisms	L-type lectin-domain containing receptor kinase IX.1-like [Prunus avium]
PaF106G0100006700.01	5447	3988	5019	8847	7682	11264	68.2582	59.7681	64.9614	120.1	111.85	140.623	2.21611e-27	1.01079	up	[QV]	Secondary metabolites biosynthesis, transport and catabolism;; Defense mechanisms	Molecular Function: iron ion binding (GO:0005506);; Cellular Component: membrane (GO:0016020);; Molecular Function: oxidoreductase activity, acting on paired donors, with incorporation or reduction of molecular oxygen, NAD(P)H as one donor, and incorporation of one atom of oxygen (GO:0016709);; Molecular Function: heme binding (GO:0020037);;	K09754|4.7e-296|pmum:103319006|K09754 5-O-(4-coumaroyl)-D-quinate 3'-monooxygenase [EC:1.14.14.96] | (RefSeq) cytochrome P450 98A2-like	Phenylpropanoid biosynthesis (ko00940);; Flavonoid biosynthesis (ko00941);; Stilbenoid, diarylheptanoid and gingerol biosynthesis (ko00945)	[Q]	Secondary metabolites biosynthesis, transport and catabolism	Cytochrome P450	Cytochrome P450 98A2 OS=Glycine max OX=3847 GN=CYP98A2 PE=2 SV=1	Q	Secondary metabolites biosynthesis, transport and catabolism	unnamed protein product [Prunus armeniaca]
PaF106G0300012036.01	574	447	627	1595	1528	1648	9.57989	8.95417	10.7918	29.1873	30.0932	27.7231	1.185e-42	1.58813	up	--	--	--	K05907|1.5e-06|egr:104441413|K05907 adenylyl-sulfate reductase (glutathione) [EC:1.8.4.9] | (RefSeq) 5'-adenylylsulfate reductase 2, chloroplastic	Sulfur metabolism (ko00920)	--	--	--	--	--	--	unnamed protein product [Prunus armeniaca]
PaF106G0300012164.01	11510	6594	7937	1390	1213	1407	86.0517	58.9966	61.21	11.3062	10.578	10.5277	2.06522e-89	-2.51411	down	[G]	Carbohydrate transport and metabolism	Molecular Function: polygalacturonase activity (GO:0004650);; Cellular Component: extracellular region (GO:0005576);; Biological Process: carbohydrate metabolic process (GO:0005975);; Biological Process: cell wall organization (GO:0071555);;	K01213|3.9e-232|pmum:103343818|K01213 galacturan 1,4-alpha-galacturonidase [EC:3.2.1.67] | (RefSeq) exopolygalacturonase clone GBGA483-like	Pentose and glucuronate interconversions (ko00040)	--	--	Glycosyl hydrolases family 28	Exopolygalacturonase clone GBGA483 OS=Arabidopsis thaliana OX=3702 GN=At3g07850 PE=2 SV=2	G	Carbohydrate transport and metabolism	PREDICTED: exopolygalacturonase clone GBGA483-like [Prunus mume]
PaF106G0400017885.01	592	337	501	90	150	130	5.46985	3.71882	4.77363	0.904082	1.61726	1.19603	4.73382e-15	-1.67704	down	--	--	Molecular Function: catechol oxidase activity (GO:0004097);; Molecular Function: monophenol monooxygenase activity (GO:0004503);; Biological Process: pigment biosynthetic process (GO:0046148);; Molecular Function: metal ion binding (GO:0046872);;	K00422|0.0e+00|pmum:103324679|K00422 polyphenol oxidase [EC:1.10.3.1] | (RefSeq) polyphenol oxidase, chloroplastic-like	Tyrosine metabolism (ko00350);; Isoquinoline alkaloid biosynthesis (ko00950)	--	--	Protein of unknown function (DUF_B2219)	Polyphenol oxidase latent form, chloroplastic OS=Prunus armeniaca OX=36596 GN=PPO PE=1 SV=1	S	Function unknown	unnamed protein product [Prunus armeniaca]
PaF106G0200007469.01	1410	1034	1174	375	398	550	19.4836	17.0922	16.7312	5.62808	6.40746	7.59897	3.93231e-26	-1.32702	down	--	--	Molecular Function: transferase activity, transferring acyl groups other than amino-acyl groups (GO:0016747);;	K13065|1.6e-88|pavi:110771447|K13065 shikimate O-hydroxycinnamoyltransferase [EC:2.3.1.133] | (RefSeq) BAHD acyltransferase At5g47980-like	Phenylpropanoid biosynthesis (ko00940);; Flavonoid biosynthesis (ko00941);; Stilbenoid, diarylheptanoid and gingerol biosynthesis (ko00945)	--	--	Transferase family	BAHD acyltransferase BIA1 OS=Arabidopsis thaliana OX=3702 GN=BIA1 PE=2 SV=1	S	Function unknown	PREDICTED: BAHD acyltransferase At5g47980-like [Prunus mume]
PaF106G0300014431.01	134	75	114	30	45	50	4.25455	2.84809	3.73367	1.03779	1.64757	1.58462	0.000428286	-1.0519	down	--	--	Biological Process: response to reactive oxygen species (GO:0000302);; Cellular Component: cellular_component (GO:0005575);; Cellular Component: intracellular (GO:0005622);; Cellular Component: cell (GO:0005623);; Cellular Component: cytoplasm (GO:0005737);; Cellular Component: peroxisome (GO:0005777);; Cellular Component: peroxisomal matrix (GO:0005782);; Biological Process: protein folding (GO:…	K13993|1.5e-37|pmum:103327393|K13993 HSP20 family protein | (RefSeq) 15.7 kDa heat shock protein, peroxisomal	Protein processing in endoplasmic reticulum (ko04141)	[O]	Posttranslational modification, protein turnover, chaperones	Hsp20/alpha crystallin family	15.7 kDa heat shock protein, peroxisomal OS=Arabidopsis thaliana OX=3702 GN=HSP15.7 PE=2 SV=1	O	Posttranslational modification, protein turnover, chaperones	HSP20-like chaperones superfamily protein [Prunus dulcis]
PaF106G0100000933.01	51	69	54	125	110	142	1.2482	2.04244	1.38105	3.3613	3.18344	3.52254	0.000133597	1.02573	up	--	--	Biological Process: regulation of transcription, DNA-templated (GO:0006355);;	K14558|3.4e-16|thj:104803652|K14558 periodic tryptophan protein 2 | (RefSeq) protein TOPLESS isoform X1	Ribosome biogenesis in eukaryotes (ko03008)	[R]	General function prediction only	--	Protein TOPLESS OS=Arabidopsis thaliana OX=3702 GN=TPL PE=1 SV=1	S	Function unknown	hypothetical protein Pyn_09792 [Prunus yedoensis var. nudiflora]
PaF106G0500019069.01	88	122	116	43	28	56	1.21064	2.00681	1.64667	0.630353	0.442459	0.770054	0.00044784	-1.06983	down	--	--	Molecular Function: protein binding (GO:0005515);;	K14298|1.3e-122|ccaj:109804893|K14298 mRNA export factor | (RefSeq) protein RAE1-like isoform X1	RNA transport (ko03013)	[A]	RNA processing and modification	WD domain, G-beta repeat	Protein RAE1 OS=Arabidopsis thaliana OX=3702 GN=RAE1 PE=1 SV=2	A	RNA processing and modification	unnamed protein product [Prunus armeniaca]
PaF106G0600024068.01	1024	708	651	157	160	255	14.7456	12.2075	9.67559	2.45816	2.67944	3.67603	1.70237e-25	-1.85772	down	--	--	Molecular Function: protein dimerization activity (GO:0046983);;	K16190|1.2e-11|bdi:100843665|K16190 glucuronokinase [EC:2.7.1.43] | (RefSeq) transcription factor TDR	Pentose and glucuronate interconversions (ko00040);; Ascorbate and aldarate metabolism (ko00053);; Amino sugar and nucleotide sugar metabolism (ko00520)	--	--	Helix-loop-helix DNA-binding domain	Transcription factor bHLH93 OS=Arabidopsis thaliana OX=3702 GN=BHLH93 PE=1 SV=1	K	Transcription	unnamed protein product [Prunus armeniaca]
PaF106G0100006479.01	332	328	286	97	102	120	5.12743	10.3508	9.0442	0.533762	1.42956	1.28029	3.33358e-13	-1.38719	down	[R]	General function prediction only	Biological Process: signal transduction (GO:0007165);; Molecular Function: ADP binding (GO:0043531);;	K00695|1.4e-135|mtr:MTR_6g478030|K00695 sucrose synthase [EC:2.4.1.13] | (RefSeq) sucrose synthase	Starch and sucrose metabolism (ko00500)	--	--	TIR domain	Disease resistance protein RPV1 OS=Vitis rotundifolia OX=103349 GN=RPV1 PE=1 SV=1	T	Signal transduction mechanisms	LOW QUALITY PROTEIN: disease resistance protein RPV1-like [Prunus dulcis]
PaF106G0100001890.01	3549	1984	3421	734	808	1075	51.9247	34.7324	51.6249	11.689	13.7857	15.7388	1.38336e-26	-1.60695	down	--	--	Molecular Function: transferase activity, transferring acyl groups other than amino-acyl groups (GO:0016747);;	K13065|1.9e-19|dzi:111306278|K13065 shikimate O-hydroxycinnamoyltransferase [EC:2.3.1.133] | (RefSeq) shikimate O-hydroxycinnamoyltransferase-like	Phenylpropanoid biosynthesis (ko00940);; Flavonoid biosynthesis (ko00941);; Stilbenoid, diarylheptanoid and gingerol biosynthesis (ko00945)	--	--	Transferase family	Protein ECERIFERUM 26 OS=Arabidopsis thaliana OX=3702 GN=CER26 PE=2 SV=1	S	Function unknown	unnamed protein product [Prunus armeniaca]
PaF106G0100006626.01	177	171	127	11	11	0	1.3921	1.61075	1.02613	0.088319	0.092202	0	0.0035662	-1.10157	down	--	--	Cellular Component: integral component of membrane (GO:0016021);;	K13466|1.1e-77|hbr:110645737|K13466 EIX receptor 1/2 | (RefSeq) probable leucine-rich repeat receptor-like protein kinase At1g35710	Plant-pathogen interaction (ko04626)	[R]	General function prediction only	Leucine rich repeat	Receptor like protein 27 OS=Arabidopsis thaliana OX=3702 GN=RLP27 PE=2 SV=1	Q	Secondary metabolites biosynthesis, transport and catabolism	PREDICTED: probable leucine-rich repeat receptor-like protein kinase At2g33170 [Prunus mume]
PaF106G0800032573.01	65	57	59	242	176	232	0.972167	1.0827	0.919368	4.48139	3.27611	3.73951	3.49202e-15	1.74498	up	[P]	Inorganic ion transport and metabolism	Molecular Function: carbonate dehydratase activity (GO:0004089);; Molecular Function: zinc ion binding (GO:0008270);; Biological Process: cyanate catabolic process (GO:0009440);; Biological Process: carbon utilization (GO:0015976);;	K01673|2.9e-145|pmum:103341853|K01673 carbonic anhydrase [EC:4.2.1.1] | (RefSeq) carbonic anhydrase 2-like	Nitrogen metabolism (ko00910)	[P]	Inorganic ion transport and metabolism	Carbonic anhydrase	Carbonic anhydrase, chloroplastic OS=Nicotiana tabacum OX=4097 PE=2 SV=1	P	Inorganic ion transport and metabolism	PREDICTED: carbonic anhydrase 2-like [Prunus mume]
PaF106G0600025342.01	0	0	0	68	69	60	0	0	0	0.836427	0.919181	0.677196	1.20907e-19	3.31067	up	[GI]	Carbohydrate transport and metabolism;; Lipid transport and metabolism	Cellular Component: extracellular region (GO:0005576);; Cellular Component: cell wall (GO:0005618);; Cellular Component: integral component of membrane (GO:0016021);; Molecular Function: pectinesterase activity (GO:0030599);; Biological Process: cell wall modification (GO:0042545);; Molecular Function: aspartyl esterase activity (GO:0045330);; Biological Process: pectin catabolic process (GO:0045…	K01051|0.0e+00|pmum:103344536|K01051 pectinesterase [EC:3.1.1.11] | (RefSeq) putative pectinesterase/pectinesterase inhibitor 28	Pentose and glucuronate interconversions (ko00040)	--	--	Pectinesterase	Putative pectinesterase/pectinesterase inhibitor 28 OS=Arabidopsis thaliana OX=3702 GN=PME28 PE=2 SV=1	G	Carbohydrate transport and metabolism	unnamed protein product [Prunus armeniaca]
PaF106G0800032778.01	173	164	132	537	509	519	1.20114	1.36101	0.94187	4.06815	4.13651	3.62115	7.95336e-25	1.73024	up	--	--	Biological Process: defense response (GO:0006952);; Molecular Function: ADP binding (GO:0043531);;	K13457|0.0e+00|pper:18768817|K13457 disease resistance protein RPM1 | (RefSeq) disease resistance protein RPM1	Plant-pathogen interaction (ko04626)	[T]	Signal transduction mechanisms	NB-ARC domain	Disease resistance protein RPM1 OS=Arabidopsis thaliana OX=3702 GN=RPM1 PE=1 SV=1	T	Signal transduction mechanisms	disease resistance protein RPM1 [Prunus persica]
PaF106G0400016911.01	67	73	50	11	9	6	0.618796	0.800408	0.470115	0.107571	0.088758	0.051852	1.419e-07	-1.87479	down	--	--	Cellular Component: integral component of membrane (GO:0016021);;	K13466|9.0e-21|cit:102616085|K13466 EIX receptor 1/2 | (RefSeq) receptor-like protein EIX1	Plant-pathogen interaction (ko04626)	[R]	General function prediction only	Leucine rich repeat	Receptor-like protein EIX1 OS=Solanum lycopersicum OX=4081 GN=EIX1 PE=2 SV=2	S	Function unknown	probable LRR receptor-like serine/threonine-protein kinase At4g36180 [Prunus avium]
PaF106G0400016106.01	16	17	18	320	317	360	0.377883	0.486161	0.4382	8.54097	9.04492	8.82683	1.84663e-62	3.8509	up	[C]	Energy production and conversion	Molecular Function: nucleotide binding (GO:0000166);; Molecular Function: succinate-CoA ligase (ADP-forming) activity (GO:0004775);; Cellular Component: mitochondrion (GO:0005739);; Biological Process: tricarboxylic acid cycle (GO:0006099);;	K01899|3.7e-43|csv:101206269|K01899 succinyl-CoA synthetase alpha subunit [EC:6.2.1.4 6.2.1.5] | (RefSeq) succinate--CoA ligase [ADP-forming] subunit alpha, mitochondrial	Citrate cycle (TCA cycle) (ko00020);; Propanoate metabolism (ko00640);; Carbon metabolism (ko01200)	[C]	Energy production and conversion	CoA binding domain	Succinate--CoA ligase [ADP-forming] subunit alpha, mitochondrial OS=Oryza sativa subsp. japonica OX=39947 GN=Os07g0577700 PE=1 SV=1	C	Energy production and conversion	hypothetical protein FNV43_RR21107 [Rhamnella rubrinervis]
Prunus_sibirica_newGene_1019	82	75	113	0	0	0	1.99493	2.18127	2.82568	0	0	0	1.03845e-23	-3.59382	down	--	--	--	K13484|1.3e-22|egu:105053874|K13484 5-hydroxyisourate hydrolase / 2-oxo-4-hydroxy-4-carboxy-5-ureidoimidazoline decarboxylase [EC:3.5.2.17 4.1.1.97] | (RefSeq) L10-interacting MYB domain-containing protein-like	Purine metabolism (ko00230)	--	--	Myb/SANT-like DNA-binding domain	L10-interacting MYB domain-containing protein OS=Arabidopsis thaliana OX=3702 GN=LIMYB PE=1 SV=1	S	Function unknown	L10-interacting MYB domain-containing protein-like [Prunus avium]
PaF106G0600022958.01	9592	7784	9945	4361	3789	4403	166.211	161.435	177.761	82.2423	76.6439	76.3927	5.41533e-32	-1.01538	down	[I]	Lipid transport and metabolism	Molecular Function: hydrolase activity (GO:0016787);;	K02952|1.1e-06|aip:107648613|K02952 small subunit ribosomal protein S13 | (RefSeq) 30S ribosomal protein S13, chloroplastic-like	Ribosome (ko03010)	--	--	Serine aminopeptidase, S33	--	S	Function unknown	PREDICTED: uncharacterized protein LOC103327901 [Prunus mume]
PaF106G0800032461.01	180	144	147	3	7	3	1.03175	0.988647	0.867246	0.018114	0.044132	0.012645	3.41596e-32	-3.6767	down	--	--	Biological Process: spliceosomal tri-snRNP complex assembly (GO:0000244);; Biological Process: mRNA splicing, via spliceosome (GO:0000398);; Cellular Component: U4/U6 x U5 tri-snRNP complex (GO:0046540);; Cellular Component: catalytic step 2 spliceosome (GO:0071013);; Biological Process: RNA-directed DNA methylation (GO:0080188);; Biological Process: positive regulation of miRNA metabolic process…	K12855|1.1e-231|pper:18767196|K12855 pre-mRNA-processing factor 6 | (RefSeq) protein STABILIZED1	Spliceosome (ko03040)	[A]	RNA processing and modification	PRP1 splicing factor, N-terminal	Protein STABILIZED1 OS=Arabidopsis thaliana OX=3702 GN=STA1 PE=1 SV=1	A	RNA processing and modification	unnamed protein product [Prunus armeniaca]
PaF106G0300011189.01	575	499	721	1348	1403	1779	4.43468	4.60952	5.73507	11.3181	12.6383	13.748	2.43584e-26	1.37431	up	[G]	Carbohydrate transport and metabolism	Biological Process: response to acid chemical (GO:0001101);; Molecular Function: molecular_function (GO:0003674);; Molecular Function: catalytic activity (GO:0003824);; Cellular Component: cellular_component (GO:0005575);; Cellular Component: intracellular (GO:0005622);; Cellular Component: cell (GO:0005623);; Cellular Component: cytoplasm (GO:0005737);; Biological Process: response to stress (GO…	K06617|0.0e+00|pmum:103329815|K06617 raffinose synthase [EC:2.4.1.82] | (RefSeq) probable galactinol--sucrose galactosyltransferase 5	Galactose metabolism (ko00052)	--	--	Raffinose synthase or seed imbibition protein Sip1	Probable galactinol--sucrose galactosyltransferase 5 OS=Arabidopsis thaliana OX=3702 GN=RFS5 PE=1 SV=1	S	Function unknown	unnamed protein product [Prunus armeniaca]
PaF106G0400015835.01	25	8	25	42	117	117	0.467138	0.16599	0.48077	0.876213	2.64428	2.25873	7.66898e-06	1.61231	up	[M]	Cell wall/membrane/envelope biogenesis	Molecular Function: catalytic activity (GO:0003824);;	K13082|2.7e-74|mesc:110605890|K13082 bifunctional dihydroflavonol 4-reductase/flavanone 4-reductase [EC:1.1.1.219 1.1.1.234] | (RefSeq) dihydroflavonol 4-reductase-like	Flavonoid biosynthesis (ko00941)	[V]	Defense mechanisms	NAD dependent epimerase/dehydratase family	Putative anthocyanidin reductase OS=Ginkgo biloba OX=3311 PE=2 SV=1	V	Defense mechanisms	unnamed protein product [Prunus armeniaca]
PaF106G0100001225.01	38	40	45	127	230	169	0.195199	0.393594	0.234028	0.718172	1.36742	0.880118	3.50438e-11	1.84183	up	[V]	Defense mechanisms	Molecular Function: ATP binding (GO:0005524);; Cellular Component: integral component of membrane (GO:0016021);; Molecular Function: ATPase activity (GO:0016887);; Molecular Function: ATPase activity, coupled to transmembrane movement of substances (GO:0042626);; Biological Process: transmembrane transport (GO:0055085);;	K05658|0.0e+00|pper:18789915|K05658 ATP-binding cassette, subfamily B (MDR/TAP), member 1 [EC:7.6.2.2] | (RefSeq) ABC transporter B family member 11	ABC transporters (ko02010)	[Q]	Secondary metabolites biosynthesis, transport and catabolism	ABC transporter	ABC transporter B family member 11 OS=Arabidopsis thaliana OX=3702 GN=ABCB11 PE=2 SV=1	Q	Secondary metabolites biosynthesis, transport and catabolism	unnamed protein product [Prunus armeniaca]
PaF106G0700027477.01	266	216	173	561	586	697	2.36517	2.2958	1.61462	5.42619	6.12039	6.22678	8.40574e-21	1.50317	up	[T]	Signal transduction mechanisms	Molecular Function: protein kinase activity (GO:0004672);; Molecular Function: ATP binding (GO:0005524);; Cellular Component: integral component of membrane (GO:0016021);;	K03283|2.7e-138|pmum:103341774|K03283 heat shock 70kDa protein 1/2/6/8 | (RefSeq) heat shock 70 kDa protein 18-like	Spliceosome (ko03040);; Protein processing in endoplasmic reticulum (ko04141);; Endocytosis (ko04144)	[T]	Signal transduction mechanisms	Arabidopsis broad-spectrum mildew resistance protein RPW8	Probable serine/threonine-protein kinase PIX13 OS=Arabidopsis thaliana OX=3702 GN=PIX13 PE=1 SV=2	T	Signal transduction mechanisms	uncharacterized protein LOC18769185 isoform X2 [Prunus persica]
PaF106G0800030520.01	46	54	32	180	181	213	0.570264	0.90524	0.410498	2.46461	2.66752	2.69018	1.20928e-14	1.92035	up	[QR]	Secondary metabolites biosynthesis, transport and catabolism;; General function prediction only	Molecular Function: O-methyltransferase activity (GO:0008171);; Molecular Function: S-adenosylmethionine-dependent methyltransferase activity (GO:0008757);; Biological Process: aromatic compound biosynthetic process (GO:0019438);; Biological Process: methylation (GO:0032259);; Molecular Function: protein dimerization activity (GO:0046983);;	K22588|5.8e-99|crb:17880076|K22588 acetylserotonin O-methyltransferase, plant [EC:2.1.1.4] | (RefSeq) xanthohumol 4'-O-methyltransferase	Tryptophan metabolism (ko00380)	[R]	General function prediction only	O-methyltransferase domain	Acetylserotonin O-methyltransferase OS=Arabidopsis thaliana OX=3702 GN=ASMT PE=1 SV=1	S	Function unknown	PREDICTED: 3'-hydroxy-N-methyl-(S)-coclaurine 4'-O-methyltransferase 2-like isoform X1 [Prunus mume]
PaF106G0300012269.01	227	173	197	63	64	93	9.77756	8.91993	8.75395	2.93892	3.19712	3.99385	2.72302e-08	-1.23326	down	--	--	Molecular Function: molecular_function (GO:0003674);; Molecular Function: binding (GO:0005488);; Cellular Component: cellular_component (GO:0005575);; Cellular Component: intracellular (GO:0005622);; Cellular Component: cell (GO:0005623);; Cellular Component: cytoplasm (GO:0005737);; Biological Process: transport (GO:0006810);; Biological Process: ion transport (GO:0006811);; Biological Process: …	K13459|3.0e-07|hbr:110673008|K13459 disease resistance protein RPS2 | (RefSeq) probable disease resistance protein At5g63020	Plant-pathogen interaction (ko04626)	--	--	--	--	L	Replication, recombination and repair	unnamed protein product [Prunus armeniaca]
PaF106G0400016726.01	124	81	132	42	31	37	0.879124	0.681991	0.964976	0.324166	0.248712	0.257206	1.19181e-05	-1.26521	down	--	--	Cellular Component: integral component of membrane (GO:0016021);;	K13466|2.5e-75|cit:102616085|K13466 EIX receptor 1/2 | (RefSeq) receptor-like protein EIX1	Plant-pathogen interaction (ko04626)	[R]	General function prediction only	Leucine rich repeat	Receptor-like protein EIX2 OS=Solanum lycopersicum OX=4081 GN=EIX2 PE=1 SV=2	S	Function unknown	PREDICTED: receptor-like protein 12 [Prunus mume]
PaF106G0300011287.01	910	721	675	233	189	299	24.6165	23.9511	19.4188	7.10611	6.00266	8.37705	1.3624e-23	-1.52804	down	--	--	Biological Process: response to acid chemical (GO:0001101);; Cellular Component: cellular_component (GO:0005575);; Cellular Component: cell (GO:0005623);; Cellular Component: plasma membrane (GO:0005886);; Biological Process: response to stress (GO:0006950);; Biological Process: response to osmotic stress (GO:0006970);; Biological Process: biological_process (GO:0008150);; Biological Process: res…	K03860|9.9e-09|nnu:104608881|K03860 phosphatidylinositol N-acetylglucosaminyltransferase subunit Q | (RefSeq) N-acetylglucosaminyl-phosphatidylinositol biosynthetic protein gpi1-like	Glycosylphosphatidylinositol (GPI)-anchor biosynthesis (ko00563)	--	--	Gibberellin regulated protein	Gibberellin-regulated protein 14 OS=Arabidopsis thaliana OX=3702 GN=GASA14 PE=1 SV=1	S	Function unknown	unnamed protein product [Prunus armeniaca]
PaF106G0700029104.01	854	633	835	1546	1497	1586	12.4164	11.0074	12.5227	24.4608	25.401	23.0896	1.65689e-22	1.06934	up	[CO]	Energy production and conversion;; Posttranslational modification, protein turnover, chaperones	Molecular Function: copper ion binding (GO:0005507);; Cellular Component: integral component of membrane (GO:0016021);;	K02258|7.8e-97|pper:18771760|K02258 cytochrome c oxidase assembly protein subunit 11 | (RefSeq) cytochrome c oxidase assembly protein COX11, mitochondrial	Oxidative phosphorylation (ko00190)	[O]	Posttranslational modification, protein turnover, chaperones	Cytochrome c oxidase assembly protein CtaG/Cox11	Cytochrome c oxidase assembly protein COX11, mitochondrial OS=Arabidopsis thaliana OX=3702 GN=COX11 PE=2 SV=1	O	Posttranslational modification, protein turnover, chaperones	unnamed protein product [Prunus armeniaca]
PaF106G0700029076.01	308	244	290	133	61	118	6.71746	6.35045	6.50596	3.15757	1.54487	2.55644	4.12579e-07	-1.2064	down	--	--	Molecular Function: DNA binding (GO:0003677);; Molecular Function: transcription cofactor activity (GO:0003712);; Molecular Function: DNA-directed 5'-3' RNA polymerase activity (GO:0003899);; Molecular Function: histone acetyltransferase activity (GO:0004402);; Biological Process: transcription, DNA-templated (GO:0006351);; Biological Process: regulation of transcription, DNA-templated (GO:000635…	K03014|4.2e-11|pavi:110759384|K03014 DNA-directed RNA polymerases I, II, and III subunit RPABC2 | (RefSeq) DNA-directed RNA polymerases II, IV and V subunit 6A-like	RNA polymerase (ko03020)	[K]	Transcription	--	DNA-directed RNA polymerases II and V subunit 6B OS=Arabidopsis thaliana OX=3702 GN=NRPB6B PE=1 SV=1	K	Transcription	PREDICTED: histone acetyltransferase HAC1-like [Prunus mume]
PaF106G0300011965.01	3639	3002	3231	556	653	779	39.2682	38.7648	35.962	6.52909	8.21579	8.4123	9.55857e-109	-2.18545	down	[G]	Carbohydrate transport and metabolism	Biological Process: polysaccharide catabolic process (GO:0000272);; Molecular Function: beta-amylase activity (GO:0016161);; Molecular Function: amylopectin maltohydrolase activity (GO:0102229);;	K01177|1.1e-300|pper:18782689|K01177 beta-amylase [EC:3.2.1.2] | (RefSeq) beta-amylase	Starch and sucrose metabolism (ko00500)	--	--	Glycosyl hydrolase family 14	Beta-amylase OS=Trifolium repens OX=3899 GN=BMY1 PE=2 SV=1	G	Carbohydrate transport and metabolism	unnamed protein product [Prunus armeniaca]
PaF106G0800030402.01	12	12	9	67	50	63	0.735899	0.893013	0.494471	4.64524	3.68233	4.02211	1.52665e-07	1.80798	up	--	--	Molecular Function: calcium ion binding (GO:0005509);; Biological Process: endocytosis (GO:0006897);; Biological Process: endosomal transport (GO:0016197);;	K12472|1.4e-19|pmum:103334612|K12472 epidermal growth factor receptor substrate 15 | (RefSeq) epidermal growth factor receptor substrate 15-like 1	Endocytosis (ko04144)	[TU]	Signal transduction mechanisms;; Intracellular trafficking, secretion, and vesicular transport	--	--	--	--	hypothetical protein PRUPE_8G179600 [Prunus persica]
PaF106G0200007167.01	154	105	107	0	0	0	14.6036	11.8353	10.4255	0	0	0	1.14275e-31	-4.05461	down	--	--	Molecular Function: DNA binding (GO:0003677);; Cellular Component: nucleus (GO:0005634);; Biological Process: regulation of transcription, DNA-templated (GO:0006355);; Biological Process: response to hormone (GO:0009725);;	K14486|5.3e-06|bdi:100824752|K14486 auxin response factor | (RefSeq) auxin response factor 11 isoform X1	Plant hormone signal transduction (ko04075)	--	--	Auxin response factor	Auxin response factor 22 OS=Oryza sativa subsp. japonica OX=39947 GN=ARF22 PE=2 SV=1	K	Transcription	PREDICTED: auxin response factor [Prunus dulcis]
PaF106G0600024624.01	133	172	125	45	48	55	1.42388	2.21685	1.38016	0.525825	0.598109	0.585362	3.55229e-06	-1.25916	down	[G]	Carbohydrate transport and metabolism	Molecular Function: ATP binding (GO:0005524);;	K09753|3.4e-06|dosa:Os09t0262000-00|K09753 cinnamoyl-CoA reductase [EC:1.2.1.44] | (RefSeq) Os09g0262000; Similar to Cinnamoyl CoA reductase.	Phenylpropanoid biosynthesis (ko00940)	[O]	Posttranslational modification, protein turnover, chaperones	ATPase family associated with various cellular activities (AAA)	Ribulose bisphosphate carboxylase/oxygenase activase 1, chloroplastic OS=Larrea tridentata OX=66636 GN=RCA1 PE=1 SV=1	O	Posttranslational modification, protein turnover, chaperones	unnamed protein product [Prunus armeniaca]
PaF106G0600021563.01	17	13	10	191	177	223	0.129709	0.123601	0.076233	1.65875	1.64958	1.77972	5.18976e-36	3.32287	up	--		Molecular Function: protein serine/threonine kinase activity (GO:0004674);; Molecular Function: ATP binding (GO:0005524);; Cellular Component: integral component of membrane (GO:0016021);; Molecular Function: carbohydrate binding (GO:0030246);; Biological Process: recognition of pollen (GO:0048544);;	K13416|3.0e-58|mdm:103416332|K13416 brassinosteroid insensitive 1-associated receptor kinase 1 [EC:2.7.10.1 2.7.11.1] | (RefSeq) BRASSINOSTEROID INSENSITIVE 1-associated receptor kinase 1-like isoform X1	MAPK signaling pathway - plant (ko04016);; Plant hormone signal transduction (ko04075);; Plant-pathogen interaction (ko04626)	--	--	Protein kinase domain	G-type lectin S-receptor-like serine/threonine-protein kinase RLK1 OS=Arabidopsis thaliana OX=3702 GN=RLK1 PE=2 SV=2	T	Signal transduction mechanisms	PREDICTED: G-type lectin S-receptor-like serine/threonine-protein kinase RLK1 [Prunus mume]
PaF106G0700027474.01	31	26	21	73	91	118	0.246135	0.243725	0.168166	0.632127	0.848205	0.928881	2.39427e-07	1.56238	up	--	--	Molecular Function: ADP binding (GO:0043531);;	K13415|3.3e-20|mdm:103413440|K13415 protein brassinosteroid insensitive 1 [EC:2.7.10.1 2.7.11.1] | (RefSeq) uncharacterized protein LOC103413440 isoform X1	Plant hormone signal transduction (ko04075)	--	--	NB-ARC domain	Probable disease resistance protein At5g66900 OS=Arabidopsis thaliana OX=3702 GN=At5g66900 PE=3 SV=1	S	Function unknown	unnamed protein product [Prunus armeniaca]
PaF106G0300012519.01	131	169	141	62	41	41	1.66421	2.57516	1.84928	0.860759	0.597996	0.521598	5.04221e-06	-1.29118	down	--	--	Biological Process: cutin biosynthetic process (GO:0010143);; Cellular Component: membrane (GO:0016020);; Cellular Component: integral component of membrane (GO:0016021);; Molecular Function: phosphatase activity (GO:0016791);; Molecular Function: glycerol-3-phosphate 2-O-acyltransferase activity (GO:0090447);;	K13508|7.1e-279|pper:18783390|K13508 glycerol-3-phosphate acyltransferase [EC:2.3.1.15 2.3.1.198] | (RefSeq) glycerol-3-phosphate acyltransferase 1	Glycerolipid metabolism (ko00561);; Glycerophospholipid metabolism (ko00564)	--	--	Acyltransferase	Glycerol-3-phosphate acyltransferase 1 OS=Arabidopsis thaliana OX=3702 GN=GPAT1 PE=1 SV=1	I	Lipid transport and metabolism	unnamed protein product [Prunus armeniaca]
PaF106G0400014847.01	0	0	0	66	64	99	0	0	0	1.22682	1.26151	1.69241	1.82998e-22	3.51188	up	--	--	Biological Process: protein polyubiquitination (GO:0000209);; Cellular Component: nucleus (GO:0005634);; Cellular Component: endoplasmic reticulum (GO:0005783);; Molecular Function: ubiquitin conjugating enzyme activity (GO:0061631);;	K10578|1.0e-118|pmum:107880826|K10578 ubiquitin-conjugating enzyme E2 J1 [EC:2.3.2.23] | (RefSeq) ubiquitin-conjugating enzyme E2 32-like	Ubiquitin mediated proteolysis (ko04120);; Protein processing in endoplasmic reticulum (ko04141)	[O]	Posttranslational modification, protein turnover, chaperones	Ubiquitin-conjugating enzyme	Ubiquitin-conjugating enzyme E2 32 OS=Arabidopsis thaliana OX=3702 GN=UBC32 PE=2 SV=1	O	Posttranslational modification, protein turnover, chaperones	unnamed protein product [Prunus armeniaca]
PaF106G0500021202.01	415	438	443	157	119	174	4.57615	5.78195	5.04209	1.88513	1.52475	1.91979	5.60258e-15	-1.36893	down	--	--	Molecular Function: DNA binding (GO:0003677);; Cellular Component: nucleus (GO:0005634);; Molecular Function: 5'-flap endonuclease activity (GO:0017108);; Molecular Function: flap endonuclease activity (GO:0048256);;	K10746|8.6e-294|pmum:103338814|K10746 exonuclease 1 [EC:3.1.-.-] | (RefSeq) exonuclease 1	Mismatch repair (ko03430)	[L]	Replication, recombination and repair	XPG N-terminal domain	Exonuclease 1 OS=Arabidopsis thaliana OX=3702 GN=EXO1 PE=2 SV=2	L	Replication, recombination and repair	PREDICTED: exonuclease 1 [Prunus mume]
PaF106G0600023488.01	178	120	164	50	34	66	1.49646	1.20553	1.41882	0.457203	0.327201	0.553897	3.4045e-07	-1.33626	down	--		Molecular Function: protein serine/threonine kinase activity (GO:0004674);; Molecular Function: ATP binding (GO:0005524);; Cellular Component: integral component of membrane (GO:0016021);;	K13416|3.6e-51|cqi:110688695|K13416 brassinosteroid insensitive 1-associated receptor kinase 1 [EC:2.7.10.1 2.7.11.1] | (RefSeq) BRASSINOSTEROID INSENSITIVE 1-associated receptor kinase 1-like	MAPK signaling pathway - plant (ko04016);; Plant hormone signal transduction (ko04075);; Plant-pathogen interaction (ko04626)	--	--	Protein kinase domain	G-type lectin S-receptor-like serine/threonine-protein kinase LECRK2 OS=Oryza sativa subsp. indica OX=39946 GN=LECRK2 PE=2 SV=1	T	Signal transduction mechanisms	unnamed protein product [Prunus armeniaca]
PaF106G0400017974.01	494	521	544	178	190	217	1.93748	2.44718	2.19999	0.757893	0.87033	0.851179	8.30096e-16	-1.27292	down	--	--	Molecular Function: protein serine/threonine kinase activity (GO:0004674);; Molecular Function: ATP binding (GO:0005524);; Cellular Component: plasma membrane (GO:0005886);; Biological Process: protein phosphorylation (GO:0006468);; Cellular Component: integral component of membrane (GO:0016021);; Biological Process: recognition of pollen (GO:0048544);;	K02987|1.9e-08|gra:105766716|K02987 small subunit ribosomal protein S4e | (RefSeq) G-type lectin S-receptor-like serine/threonine-protein kinase SD1-13	Ribosome (ko03010)	--	--	D-mannose binding lectin	Putative G-type lectin S-receptor-like serine/threonine-protein kinase At1g61610 OS=Arabidopsis thaliana OX=3702 GN=At1g61610 PE=3 SV=1	T	Signal transduction mechanisms	PREDICTED: uncharacterized protein LOC103324607 [Prunus mume]
PaF106G0100006528.01	2	0	0	510	583	531	0.009933	0	0	3.71446	4.55615	3.55884	1.33925e-98	6.13692	up	--	--	Molecular Function: nucleic acid binding (GO:0003676);; Biological Process: DNA integration (GO:0015074);; Molecular Function: kinase activity (GO:0016301);;	K12447|2.9e-220|thj:104808371|K12447 UDP-sugar pyrophosphorylase [EC:2.7.7.64] | (RefSeq) uncharacterized protein LOC104808371	Pentose and glucuronate interconversions (ko00040);; Galactose metabolism (ko00052);; Ascorbate and aldarate metabolism (ko00053);; Amino sugar and nucleotide sugar metabolism (ko00520)	[R]	General function prediction only	Reverse transcriptase (RNA-dependent DNA polymerase)	Retrovirus-related Pol polyprotein from transposon RE1 OS=Arabidopsis thaliana OX=3702 GN=RE1 PE=2 SV=1	L	Replication, recombination and repair	wall-associated kinase 2 [Prunus dulcis]
PaF106G0300012884.01	113	65	51	186	412	253	1.66154	1.17632	0.801197	2.99841	7.41055	6.54101	1.2952e-08	1.66258	up	--	--	--	K12173|6.0e-46|gmx:100794341|K12173 BRCA1-A complex subunit BRE | (RefSeq) BRISC and BRCA1-A complex member 2	Homologous recombination (ko03440)	--	--	Thaumatin family	Thaumatin-like protein 1 OS=Prunus persica OX=3760 PE=2 SV=1	S	Function unknown	hypothetical protein CR513_12220, partial [Mucuna pruriens]
PaF106G0800031286.01	3544	2969	3138	1147	1156	1589	37.1553	37.664	32.961	13.0473	13.8346	16.4075	2.34657e-38	-1.21063	down	[I]	Lipid transport and metabolism	Molecular Function: catalytic activity (GO:0003824);; Biological Process: signal transduction (GO:0007165);; Molecular Function: ADP binding (GO:0043531);;	K01897|5.9e-116|pavi:110773637|K01897 long-chain acyl-CoA synthetase [EC:6.2.1.3] | (RefSeq) LOW QUALITY PROTEIN: long chain acyl-CoA synthetase 2-like	Fatty acid biosynthesis (ko00061);; Fatty acid degradation (ko00071);; Fatty acid metabolism (ko01212);; Peroxisome (ko04146)	[I]	Lipid transport and metabolism	AMP-binding enzyme	Long chain acyl-CoA synthetase 2 OS=Arabidopsis thaliana OX=3702 GN=LACS2 PE=2 SV=1	I	Lipid transport and metabolism	unnamed protein product [Prunus armeniaca]
PaF106G0800029787.01	3080	2861	3268	1556	1204	1347	34.9661	38.8709	38.2741	19.2195	15.9562	15.3092	2.39736e-19	-1.04785	down	--	--	Molecular Function: iron ion binding (GO:0005506);; Molecular Function: oxidoreductase activity, acting on paired donors, with incorporation or reduction of molecular oxygen (GO:0016705);; Molecular Function: heme binding (GO:0020037);;	K20769|6.8e-108|pmum:103334522|K20769 fatty acid omega-hydroxylase [EC:1.14.-.-] | (RefSeq) cytochrome P450 94A1-like	Cutin, suberine and wax biosynthesis (ko00073)	[QI]	Secondary metabolites biosynthesis, transport and catabolism;; Lipid transport and metabolism	Cytochrome P450	Cytochrome P450 94A2 OS=Vicia sativa OX=3908 GN=CYP94A2 PE=2 SV=1	--	--	unnamed protein product [Prunus armeniaca]
PaF106G0100005910.01	3814	2951	3881	1148	1106	1694	31.3032	28.9858	32.8534	10.2553	10.5896	13.9163	4.46124e-31	-1.32028	down	[G]	Carbohydrate transport and metabolism	Molecular Function: hydrolase activity, hydrolyzing O-glycosyl compounds (GO:0004553);; Molecular Function: xylan 1,4-beta-xylosidase activity (GO:0009044);; Cellular Component: plant-type cell wall (GO:0009505);; Cellular Component: plasmodesma (GO:0009506);; Cellular Component: chloroplast (GO:0009507);; Biological Process: arabinan catabolic process (GO:0031222);; Biological Process: xylan cat…	K15920|2.9e-223|gab:108476039|K15920 xylan 1,4-beta-xylosidase [EC:3.2.1.37] | (RefSeq) beta-xylosidase/alpha-L-arabinofuranosidase 2	Amino sugar and nucleotide sugar metabolism (ko00520)	--	--	Glycosyl hydrolase family 3 C-terminal domain	Probable beta-D-xylosidase 7 OS=Arabidopsis thaliana OX=3702 GN=BXL7 PE=2 SV=2	G	Carbohydrate transport and metabolism	unnamed protein product [Prunus armeniaca]
PaF106G0800030529.01	58	51	83	12	12	32	0.944047	0.99781	1.4061	0.200694	0.217781	0.518495	0.000830176	-1.21208	down	[K]	Transcription	Molecular Function: O-methyltransferase activity (GO:0008171);; Biological Process: methylation (GO:0032259);; Molecular Function: protein dimerization activity (GO:0046983);;	K22588|1.7e-106|ath:AT4G35160|K22588 acetylserotonin O-methyltransferase, plant [EC:2.1.1.4] | (RefSeq) O-methyltransferase family protein	Tryptophan metabolism (ko00380)	[R]	General function prediction only	O-methyltransferase domain	Acetylserotonin O-methyltransferase OS=Arabidopsis thaliana OX=3702 GN=ASMT PE=1 SV=1	S	Function unknown	unnamed protein product [Prunus armeniaca]
PaF106G0500020435.01	3625	2918	2706	971	826	1347	39.4774	38.029	30.395	11.5091	10.4931	14.6814	1.18537e-30	-1.43895	down	--	--	Molecular Function: iron ion binding (GO:0005506);; Cellular Component: membrane (GO:0016020);; Cellular Component: integral component of membrane (GO:0016021);; Molecular Function: oxidoreductase activity, acting on paired donors, with incorporation or reduction of molecular oxygen, NAD(P)H as one donor, and incorporation of one atom of oxygen (GO:0016709);; Molecular Function: heme binding (GO:…	K00495|3.8e-137|pmum:103337951|K00495 phenylacetaldehyde oxime monooxygenase [EC:1.14.14.44] | (RefSeq) cytochrome P450 71A1-like	Cyanoamino acid metabolism (ko00460)	[Q]	Secondary metabolites biosynthesis, transport and catabolism	Cytochrome P450	Phenylacetaldehyde oxime monooxygenase CYP71AN24 OS=Prunus mume OX=102107 GN=CYP71AN24 PE=1 SV=1	Q	Secondary metabolites biosynthesis, transport and catabolism	cytochrome P450 71A1-like [Prunus mume]
PaF106G0100006582.01	33	5	27	59	56	68	0.829553	0.133534	0.683196	1.61251	1.62543	1.70584	0.00449679	1.07977	up	--	--	Cellular Component: nucleolus (GO:0005730);; Molecular Function: rRNA binding (GO:0019843);; Cellular Component: small-subunit processome (GO:0032040);; Molecular Function: rRNA (pseudouridine) methyltransferase activity (GO:0070037);; Biological Process: rRNA base methylation (GO:0070475);;	K14568|6.6e-127|pmum:103319212|K14568 rRNA small subunit pseudouridine methyltransferase Nep1 [EC:2.1.1.260] | (RefSeq) ribosomal RNA small subunit methyltransferase nep-1-like	Ribosome biogenesis in eukaryotes (ko03008)	[J]	Translation, ribosomal structure and biogenesis	EMG1/NEP1 methyltransferase	--	J	Translation, ribosomal structure and biogenesis	unnamed protein product [Prunus armeniaca]
PaF106G0300014536.01	4	16	10	43	74	106	0.051003	0.232844	0.129731	0.586428	1.10234	1.34557	3.12074e-07	1.8747	up	--	--	Biological Process: cutin biosynthetic process (GO:0010143);; Cellular Component: membrane (GO:0016020);; Molecular Function: phosphatase activity (GO:0016791);; Molecular Function: glycerol-3-phosphate 2-O-acyltransferase activity (GO:0090447);;	K13508|3.0e-304|pmum:103327322|K13508 glycerol-3-phosphate acyltransferase [EC:2.3.1.15 2.3.1.198] | (RefSeq) probable glycerol-3-phosphate acyltransferase 3	Glycerolipid metabolism (ko00561);; Glycerophospholipid metabolism (ko00564)	--	--	Acyltransferase	Probable glycerol-3-phosphate acyltransferase 2 OS=Arabidopsis thaliana OX=3702 GN=GPAT2 PE=2 SV=1	I	Lipid transport and metabolism	PREDICTED: probable glycerol-3-phosphate acyltransferase 3 [Prunus mume]
PaF106G0100004308.01	0	0	0	346	386	495	0	0	0	13.1481	15.7521	17.3322	2.00588e-84	5.902	up	[O]	Posttranslational modification, protein turnover, chaperones	Molecular Function: serine-type endopeptidase activity (GO:0004252);; Cellular Component: extracellular space (GO:0005615);;	K12663|6.4e-07|aip:107640222|K12663 Delta3,5-Delta2,4-dienoyl-CoA isomerase [EC:5.3.3.21] | (RefSeq) delta(3,5)-Delta(2,4)-dienoyl-CoA isomerase, peroxisomal-like	Peroxisome (ko04146)	--	--	Subtilase family	Subtilisin-like protease SBT3 OS=Solanum lycopersicum OX=4081 GN=sbt3 PE=1 SV=1	O	Posttranslational modification, protein turnover, chaperones	hypothetical protein PRUPE_1G433200 [Prunus persica]
PaF106G0600022188.01	101	136	81	8	41	54	1.99325	3.22043	1.64701	0.15708	0.940079	1.07326	0.00410208	-1.07803	down	[IQR]	Lipid transport and metabolism;; Secondary metabolites biosynthesis, transport and catabolism;; General function prediction only	Molecular Function: oxidoreductase activity (GO:0016491);;	K08081|7.2e-150|pper:18772283|K08081 tropinone reductase I [EC:1.1.1.206] | (RefSeq) tropinone reductase homolog At5g06060 isoform X1	Tropane, piperidine and pyridine alkaloid biosynthesis (ko00960)	[R]	General function prediction only	Enoyl-(Acyl carrier protein) reductase	Tropinone reductase homolog At5g06060 OS=Arabidopsis thaliana OX=3702 GN=At5g06060 PE=2 SV=1	Q	Secondary metabolites biosynthesis, transport and catabolism	unnamed protein product [Prunus armeniaca]
PaF106G0700027475.01	5	12	7	92	130	124	0.039894	0.116055	0.06052	0.836031	1.2718	1.03994	3.80866e-19	2.87402	up	[R]	General function prediction only	Molecular Function: ADP binding (GO:0043531);;	K13415|5.0e-37|mdm:103413440|K13415 protein brassinosteroid insensitive 1 [EC:2.7.10.1 2.7.11.1] | (RefSeq) uncharacterized protein LOC103413440 isoform X1	Plant hormone signal transduction (ko04075)	--	--	NB-ARC domain	Probable disease resistance protein At5g66900 OS=Arabidopsis thaliana OX=3702 GN=At5g66900 PE=3 SV=1	S	Function unknown	unnamed protein product [Prunus armeniaca]
PaF106G0800032469.01	226	106	93	753	766	1030	4.53815	2.50757	1.94841	19.0809	20.3431	22.9015	1.96363e-30	2.44166	up	[I]	Lipid transport and metabolism	Molecular Function: 3-hydroxyisobutyryl-CoA hydrolase activity (GO:0003860);; Biological Process: valine catabolic process (GO:0006574);;	K05605|1.7e-78|pmum:103322388|K05605 3-hydroxyisobutyryl-CoA hydrolase [EC:3.1.2.4] | (RefSeq) 3-hydroxyisobutyryl-CoA hydrolase-like protein 5	Valine, leucine and isoleucine degradation (ko00280);; beta-Alanine metabolism (ko00410);; Propanoate metabolism (ko00640);; Carbon metabolism (ko01200)	--	--	Enoyl-CoA hydratase/isomerase	3-hydroxyisobutyryl-CoA hydrolase-like protein 5 OS=Arabidopsis thaliana OX=3702 GN=At1g06550 PE=1 SV=2	I	Lipid transport and metabolism	PREDICTED: 3-hydroxyisobutyryl-CoA hydrolase-like protein 5 [Prunus mume]
PaF106G0100002301.01	168	142	188	1002	688	735	2.84818	2.8891	3.29162	18.554	13.6668	12.5186	9.64172e-36	2.23365	up	[G]	Carbohydrate transport and metabolism	Biological Process: biosynthetic process (GO:0009058);; Cellular Component: integral component of membrane (GO:0016021);; Molecular Function: strictosidine synthase activity (GO:0016844);;	K01757|2.9e-46|csat:104713030|K01757 strictosidine synthase [EC:4.3.3.2] | (RefSeq) protein STRICTOSIDINE SYNTHASE-LIKE 12	Indole alkaloid biosynthesis (ko00901)	[R]	General function prediction only	Strictosidine synthase	Protein STRICTOSIDINE SYNTHASE-LIKE 13 OS=Arabidopsis thaliana OX=3702 GN=SSL13 PE=1 SV=1	J	Translation, ribosomal structure and biogenesis	unnamed protein product [Prunus armeniaca]
PaF106G0500019363.01	1314	1308	1162	57	33	35	8.27301	9.85745	7.54482	0.388889	0.24052	0.216303	1.37173e-134	-4.49668	down	[R]	General function prediction only	Biological Process: signal transduction (GO:0007165);; Molecular Function: ADP binding (GO:0043531);;	K00695|8.0e-168|mtr:MTR_6g478030|K00695 sucrose synthase [EC:2.4.1.13] | (RefSeq) sucrose synthase	Starch and sucrose metabolism (ko00500)	--	--	TIR domain	Disease resistance protein RPV1 OS=Vitis rotundifolia OX=103349 GN=RPV1 PE=1 SV=1	T	Signal transduction mechanisms	PREDICTED: TMV resistance protein N-like isoform X1 [Prunus mume]
PaF106G0200008939.01	86	63	57	153	140	176	1.02708	0.894513	0.702411	1.99828	1.95306	2.10948	1.81248e-06	1.14088	up	--	--	Cellular Component: integral component of membrane (GO:0016021);;	K13667|1.2e-06|cvr:CHLNCDRAFT_139417|K13667 EGF-domain serine glucosyl/xylosyltransferase [EC:2.4.1.376 2.4.2.63] | (RefSeq) hypothetical protein	Other types of O-glycan biosynthesis (ko00514)	[R]	General function prediction only	Glycosyl transferase family 90	--	S	Function unknown	unnamed protein product [Prunus armeniaca]
PaF106G0800030401.01	290	326	390	788	733	829	1.58636	2.13945	2.20539	4.70849	4.69631	4.55755	1.46595e-16	1.25075	up	[R]	General function prediction only	Biological Process: signal transduction (GO:0007165);; Molecular Function: ADP binding (GO:0043531);;	K00695|1.0e-97|mtr:MTR_6g478030|K00695 sucrose synthase [EC:2.4.1.13] | (RefSeq) sucrose synthase	Starch and sucrose metabolism (ko00500)	--	--	TIR domain	TMV resistance protein N OS=Nicotiana glutinosa OX=35889 GN=N PE=1 SV=1	T	Signal transduction mechanisms	PREDICTED: probable disease resistance protein RPP1 isoform X2 [Prunus mume]
PaF106G0400017881.01	225	258	214	64	65	71	2.61325	3.5787	2.56261	0.803378	0.868133	0.823573	4.54234e-12	-1.55577	down	--	--	Molecular Function: catechol oxidase activity (GO:0004097);; Biological Process: pigment biosynthetic process (GO:0046148);; Molecular Function: metal ion binding (GO:0046872);;	K00422|0.0e+00|pavi:110770889|K00422 polyphenol oxidase [EC:1.10.3.1] | (RefSeq) polyphenol oxidase, chloroplastic-like	Tyrosine metabolism (ko00350);; Isoquinoline alkaloid biosynthesis (ko00950)	--	--	Protein of unknown function (DUF_B2219)	Polyphenol oxidase, chloroplastic OS=Malus domestica OX=3750 PE=1 SV=1	S	Function unknown	unnamed protein product [Prunus armeniaca]
PaF106G0100006216.01	67	72	54	168	159	164	1.04839	1.35768	0.875566	2.89359	2.9245	2.60294	1.74888e-07	1.2717	up	--	--	Cellular Component: integral component of membrane (GO:0016021);;	K13466|1.0e-12|spen:107024367|K13466 EIX receptor 1/2 | (RefSeq) receptor-like protein EIX2	Plant-pathogen interaction (ko04626)	[R]	General function prediction only	Leucine rich repeat	Receptor like protein 24 OS=Arabidopsis thaliana OX=3702 GN=RLP24 PE=3 SV=1	S	Function unknown	unnamed protein product [Prunus armeniaca]
PaF106G0700027288.01	335	295	251	670	665	670	5.93155	6.25064	4.5822	12.936	13.7627	11.8932	3.77032e-16	1.22578	up	--	--	Cellular Component: nucleus (GO:0005634);; Cellular Component: plasma membrane (GO:0005886);; Biological Process: negative regulation of transcription, DNA-templated (GO:0045892);;	K01870|2.6e-11|smo:SELMODRAFT_437676|K01870 isoleucyl-tRNA synthetase [EC:6.1.1.5] | (RefSeq) hypothetical protein	Aminoacyl-tRNA biosynthesis (ko00970)	--	--	Transcriptional repressor, ovate	Transcription repressor OFP7 OS=Arabidopsis thaliana OX=3702 GN=OFP7 PE=2 SV=1	S	Function unknown	unnamed protein product [Prunus armeniaca]
PaF106G0400018193.01	288	194	194	47	57	54	4.37982	3.53702	3.04577	0.779634	0.998312	0.824042	3.32223e-14	-1.77853	down	[Q]	Secondary metabolites biosynthesis, transport and catabolism	Molecular Function: oxidoreductase activity (GO:0016491);; Molecular Function: metal ion binding (GO:0046872);;	K04125|3.3e-161|pmum:103324491|K04125 gibberellin 2beta-dioxygenase [EC:1.14.11.13] | (RefSeq) gibberellin 2-beta-dioxygenase 8 isoform X1	Diterpenoid biosynthesis (ko00904)	[QR]	Secondary metabolites biosynthesis, transport and catabolism;; General function prediction only	2OG-Fe(II) oxygenase superfamily	Gibberellin 2-beta-dioxygenase 8 OS=Arabidopsis thaliana OX=3702 GN=GA2OX8 PE=1 SV=2	Q	Secondary metabolites biosynthesis, transport and catabolism	unnamed protein product [Prunus armeniaca]
PaF106G0300012161.01	137	120	108	0	0	0	4.53949	4.7569	3.66285	0	0	0	2.72734e-32	-4.08352	down	--	--	Molecular Function: polygalacturonase activity (GO:0004650);; Cellular Component: extracellular region (GO:0005576);; Biological Process: carbohydrate metabolic process (GO:0005975);; Biological Process: cell wall organization (GO:0071555);;	K01213|1.8e-76|pmum:103329198|K01213 galacturan 1,4-alpha-galacturonidase [EC:3.2.1.67] | (RefSeq) exopolygalacturonase-like	Pentose and glucuronate interconversions (ko00040)	--	--	Glycosyl hydrolases family 28	Exopolygalacturonase (Fragment) OS=Oenothera organensis OX=3945 PE=2 SV=1	G	Carbohydrate transport and metabolism	PREDICTED: exopolygalacturonase-like [Prunus mume]
PaF106G0100000133.01	75	54	50	21	14	20	5.58331	4.81593	3.84122	1.6887	1.17641	1.44199	0.000519067	-1.19828	down	--	--	Molecular Function: molecular_function (GO:0003674);; Cellular Component: cellular_component (GO:0005575);; Cellular Component: intracellular (GO:0005622);; Cellular Component: cell (GO:0005623);; Cellular Component: nucleus (GO:0005634);; Biological Process: cellular protein modification process (GO:0006464);; Biological Process: nitrogen compound metabolic process (GO:0006807);; Biological Proc…	K12160|2.8e-39|pmum:103324257|K12160 small ubiquitin-related modifier | (RefSeq) small ubiquitin-related modifier 1-like	RNA transport (ko03013)	[O]	Posttranslational modification, protein turnover, chaperones	Ubiquitin-2 like Rad60 SUMO-like	--	O	Posttranslational modification, protein turnover, chaperones	small ubiquitin-related modifier 1 [Prunus persica]
PaF106G0600022783.01	124	85	91	35	23	43	1.99684	1.62551	1.51409	0.60611	0.429879	0.690129	3.96695e-05	-1.22522	down	[E]	Amino acid transport and metabolism	Molecular Function: L-threonine ammonia-lyase activity (GO:0004794);; Biological Process: isoleucine biosynthetic process (GO:0009097);; Molecular Function: pyridoxal phosphate binding (GO:0030170);;	K01754|1.9e-237|pmum:103327534|K01754 threonine dehydratase [EC:4.3.1.19] | (RefSeq) threonine dehydratase biosynthetic, chloroplastic-like	Glycine, serine and threonine metabolism (ko00260);; Valine, leucine and isoleucine biosynthesis (ko00290);; Carbon metabolism (ko01200);; Biosynthesis of amino acids (ko01230)	[E]	Amino acid transport and metabolism	Pyridoxal-phosphate dependent enzyme	Threonine dehydratase 1 biosynthetic, chloroplastic OS=Solanum lycopersicum OX=4081 GN=TD1 PE=1 SV=1	E	Amino acid transport and metabolism	unnamed protein product [Prunus armeniaca]
PaF106G0200007374.01	260	274	290	721	650	803	1.55173	1.95787	1.78311	4.68984	4.53516	4.80739	9.46729e-26	1.42828	up	[R]	General function prediction only	Molecular Function: ADP binding (GO:0043531);;	K12818|4.8e-205|mtr:MTR_0267s0070|K12818 ATP-dependent RNA helicase DHX8/PRP22 [EC:3.6.4.13] | (RefSeq) NB-ARC domain disease resistance protein, putative	Spliceosome (ko03040)	[T]	Signal transduction mechanisms	NB-ARC domain	Putative disease resistance RPP13-like protein 1 OS=Arabidopsis thaliana OX=3702 GN=RPPL1 PE=3 SV=1	T	Signal transduction mechanisms	PREDICTED: LOW QUALITY PROTEIN: putative disease resistance RPP13-like protein 1 [Prunus mume]
PaF106G0800032168.01	10	0	6	60	83	62	0.298186	0	0.181065	2.13139	3.15441	2.01481	4.55942e-10	2.29175	up	[H]	Coenzyme transport and metabolism	Biological Process: cellular amino acid metabolic process (GO:0006520);; Biological Process: pyridoxine biosynthetic process (GO:0008615);; Molecular Function: amine-lyase activity (GO:0016843);; Biological Process: pyridoxal phosphate biosynthetic process (GO:0042823);;	K06215|3.1e-33|cic:CICLE_v10012274mg|K06215 pyridoxal 5'-phosphate synthase pdxS subunit [EC:4.3.3.6] | (RefSeq) hypothetical protein	Vitamin B6 metabolism (ko00750)	[H]	Coenzyme transport and metabolism	SOR/SNZ family	Probable pyridoxal 5'-phosphate synthase subunit PDX1 OS=Hevea brasiliensis OX=3981 GN=PDX1 PE=2 SV=1	H	Coenzyme transport and metabolism	hypothetical protein PRUPE_8G053100 [Prunus persica]
PaF106G0100000246.01	162	103	101	490	696	988	2.81772	2.19713	1.8399	9.25086	14.121	17.228	3.64724e-32	2.42744	up	[E]	Amino acid transport and metabolism	Cellular Component: plasma membrane (GO:0005886);; Molecular Function: zinc ion binding (GO:0008270);; Biological Process: methionine biosynthetic process (GO:0009086);; Biological Process: methylation (GO:0032259);; Molecular Function: betaine-homocysteine S-methyltransferase activity (GO:0047150);;	K00547|2.8e-188|pmum:103324014|K00547 homocysteine S-methyltransferase [EC:2.1.1.10] | (RefSeq) homocysteine S-methyltransferase 3	Cysteine and methionine metabolism (ko00270)	[E]	Amino acid transport and metabolism	Homocysteine S-methyltransferase	Homocysteine S-methyltransferase 3 OS=Arabidopsis thaliana OX=3702 GN=HMT3 PE=1 SV=2	E	Amino acid transport and metabolism	PREDICTED: homocysteine S-methyltransferase 3 [Prunus mume]
PaF106G0600024288.01	96	46	89	31	15	36	1.23767	0.704946	1.18192	0.437752	0.213127	0.467994	0.00252782	-1.05077	down	--	--	Cellular Component: integral component of membrane (GO:0016021);;	K01193|5.7e-26|ats:109747879|K01193 beta-fructofuranosidase [EC:3.2.1.26] | (RefSeq) LOC109747879; beta-fructofuranosidase, insoluble isoenzyme 3-like	Galactose metabolism (ko00052);; Starch and sucrose metabolism (ko00500)	--	--	Plant protein of unknown function	UPF0481 protein At3g47200 OS=Arabidopsis thaliana OX=3702 GN=At3g47200 PE=2 SV=1	S	Function unknown	PREDICTED: UPF0481 protein At3g47200 [Prunus mume]
PaF106G0200009680.01	58	59	75	11	21	32	0.810405	0.975714	1.0859	0.163958	0.328966	0.442628	0.00182312	-1.10804	down	[Q]	Secondary metabolites biosynthesis, transport and catabolism	Biological Process: fatty acid biosynthetic process (GO:0006633);; Cellular Component: integral component of membrane (GO:0016021);; Molecular Function: transferase activity, transferring acyl groups other than amino-acyl groups (GO:0016747);;	K15397|2.3e-276|pper:18785426|K15397 3-ketoacyl-CoA synthase [EC:2.3.1.199] | (RefSeq) 3-ketoacyl-CoA synthase 19	Fatty acid elongation (ko00062);; Plant-pathogen interaction (ko04626)	--	--	FAE1/Type III polyketide synthase-like protein	3-ketoacyl-CoA synthase 19 OS=Arabidopsis thaliana OX=3702 GN=KCS19 PE=2 SV=1	I	Lipid transport and metabolism	3-ketoacyl-CoA synthase 19 [Prunus persica]
PaF106G0700027926.01	78	96	60	9	16	10	0.879435	1.29771	0.69479	0.108416	0.208202	0.102982	5.61539e-08	-1.87857	down	--	--	--	K07456|6.5e-27|pavi:110766748|K07456 DNA mismatch repair protein MutS2 | (RefSeq) uncharacterized protein LOC110766748	Mismatch repair (ko03430)	--	--	Domain of unknown function (DUF2828)	--	S	Function unknown	unnamed protein product [Prunus armeniaca]
PaF106G0800032869.01	202	218	201	106	70	84	1.84667	2.40399	1.89522	1.0601	0.740343	0.769152	8.49638e-06	-1.05293	down	--	--	Molecular Function: zinc ion binding (GO:0008270);; Biological Process: RNA modification (GO:0009451);; Cellular Component: intracellular membrane-bounded organelle (GO:0043231);;	K13800|3.2e-28|csv:101217681|K13800 UMP-CMP kinase [EC:2.7.4.14] | (RefSeq) UMP-CMP kinase isoform X1	Pyrimidine metabolism (ko00240)	[R]	General function prediction only	PPR repeat	Pentatricopeptide repeat-containing protein At1g71420 OS=Arabidopsis thaliana OX=3702 GN=PCMP-H70 PE=2 SV=1	S	Function unknown	PREDICTED: pentatricopeptide repeat-containing protein At1g71420 [Prunus mume]
PaF106G0300014285.01	38	24	19	61	62	71	0.534445	0.396488	0.266869	0.925274	1.00691	0.994692	0.00165241	1.05083	up	--	--	Molecular Function: transferase activity, transferring acyl groups other than amino-acyl groups (GO:0016747);;	K13065|1.1e-24|lsv:111878060|K13065 shikimate O-hydroxycinnamoyltransferase [EC:2.3.1.133] | (RefSeq) shikimate O-hydroxycinnamoyltransferase-like	Phenylpropanoid biosynthesis (ko00940);; Flavonoid biosynthesis (ko00941);; Stilbenoid, diarylheptanoid and gingerol biosynthesis (ko00945)	--	--	Transferase family	Acyl transferase 9 OS=Oryza sativa subsp. japonica OX=39947 GN=AT9 PE=2 SV=1	S	Function unknown	shikimate O-hydroxycinnamoyltransferase [Prunus persica]
PaF106G0400015032.01	1303	815	898	180	164	299	15.8722	12.0703	11.4066	2.22316	2.26831	3.5352	1.61242e-30	-2.02101	down	[F]	Nucleotide transport and metabolism	Cellular Component: cytoplasm (GO:0005737);; Molecular Function: hydrolase activity, acting on carbon-nitrogen (but not peptide) bonds (GO:0016810);;	K01464|4.7e-76|pper:18778568|K01464 dihydropyrimidinase [EC:3.5.2.2] | (RefSeq) dihydropyrimidinase	Pyrimidine metabolism (ko00240);; beta-Alanine metabolism (ko00410);; Pantothenate and CoA biosynthesis (ko00770)	[F]	Nucleotide transport and metabolism	Amidohydrolase family	Dihydropyrimidinase OS=Arabidopsis thaliana OX=3702 GN=PYD2 PE=1 SV=1	F	Nucleotide transport and metabolism	unnamed protein product [Prunus armeniaca]
PaF106G0600024883.01	27	19	30	100	124	153	0.807296	0.679864	0.912535	0.983248	1.11481	1.1666	1.32715e-12	1.99439	up	--	--	Molecular Function: protein binding (GO:0005515);; Biological Process: biological_process (GO:0008150);; Biological Process: tissue development (GO:0009888);; Biological Process: meristem maintenance (GO:0010073);; Biological Process: multicellular organismal process (GO:0032501);; Biological Process: developmental process (GO:0032502);; Biological Process: meristem development (GO:0048507);; Bio…	K13466|2.1e-10|vvi:104882119|K13466 EIX receptor 1/2 | (RefSeq) receptor-like protein 12	Plant-pathogen interaction (ko04626)	[R]	General function prediction only	Leucine rich repeat	Receptor-like protein 49 OS=Arabidopsis thaliana OX=3702 GN=RLP49 PE=2 SV=2	T	Signal transduction mechanisms	unnamed protein product [Prunus armeniaca]
PaF106G0200010499.01	136	84	81	279	256	296	1.79887	1.31897	1.10483	4.02243	3.95587	3.91801	7.01986e-12	1.43491	up	[QV]	Secondary metabolites biosynthesis, transport and catabolism;; Defense mechanisms	Molecular Function: monooxygenase activity (GO:0004497);; Molecular Function: iron ion binding (GO:0005506);; Cellular Component: integral component of membrane (GO:0016021);; Molecular Function: oxidoreductase activity, acting on paired donors, with incorporation or reduction of molecular oxygen (GO:0016705);; Molecular Function: heme binding (GO:0020037);;	K07425|2.8e-190|nau:109241958|K07425 long-chain fatty acid omega-monooxygenase [EC:1.14.14.80] | (RefSeq) cytokinin hydroxylase-like	Fatty acid degradation (ko00071);; Arachidonic acid metabolism (ko00590)	[QI]	Secondary metabolites biosynthesis, transport and catabolism;; Lipid transport and metabolism	Cytochrome P450	Cytochrome P450 714C2 OS=Oryza sativa subsp. japonica OX=39947 GN=CYP714C2 PE=2 SV=1	Q	Secondary metabolites biosynthesis, transport and catabolism	unnamed protein product [Prunus armeniaca]
PaF106G0500018896.01	692	585	727	1424	1185	1503	12.4266	12.6832	13.4618	27.792	24.3507	26.8767	6.39244e-24	1.09952	up	[M]	Cell wall/membrane/envelope biogenesis	Molecular Function: oxidoreductase activity (GO:0016491);; Molecular Function: oxidoreductase activity, acting on the CH-OH group of donors, NAD or NADP as acceptor (GO:0016616);;	K09753|2.6e-27|ppp:112293893|K09753 cinnamoyl-CoA reductase [EC:1.2.1.44] | (RefSeq) cinnamoyl-CoA reductase 1-like	Phenylpropanoid biosynthesis (ko00940)	[V]	Defense mechanisms	--	Cinnamoyl-CoA reductase-like SNL6 OS=Oryza sativa subsp. japonica OX=39947 GN=SNL6 PE=3 SV=1	V	Defense mechanisms	unnamed protein product [Prunus armeniaca]
PaF106G0100004475.01	698	539	480	33	41	94	9.97538	9.30126	7.05365	0.496273	0.663772	1.32956	5.33458e-35	-2.91019	down	--	--	Molecular Function: DNA binding (GO:0003677);; Cellular Component: nucleus (GO:0005634);;	K15777|8.2e-45|mesc:110630336|K15777 4,5-DOPA dioxygenase extradiol [EC:1.13.11.-] | (RefSeq) uncharacterized protein LOC110630336	Betalain biosynthesis (ko00965)	--	--	ZF-HD protein dimerisation region	Zinc-finger homeodomain protein 6 OS=Arabidopsis thaliana OX=3702 GN=ZHD6 PE=1 SV=1	K	Transcription	unnamed protein product [Prunus armeniaca]
PaF106G0400014796.01	251	220	178	469	698	828	2.65859	2.7773	1.94796	5.43159	8.69489	8.80817	1.0085e-16	1.58158	up	--	--	Biological Process: response to hypoxia (GO:0001666);; Biological Process: defense response to insect (GO:0002213);; Cellular Component: nucleus (GO:0005634);; Cellular Component: cytoplasm (GO:0005737);; Biological Process: lipid metabolic process (GO:0006629);; Biological Process: response to insect (GO:0009625);; Biological Process: defense response to bacterium, incompatible interaction (GO:0…	K18875|7.9e-49|mdm:103455264|K18875 enhanced disease susceptibility 1 protein | (RefSeq) protein EDS1-like	Plant-pathogen interaction (ko04626)	--	--	Enhanced disease susceptibility 1 protein EP domain	Lipase-like PAD4 OS=Arabidopsis thaliana OX=3702 GN=PAD4 PE=1 SV=1	G	Carbohydrate transport and metabolism	hypothetical protein PRUPE_4G276500 [Prunus persica]
PaF106G0700027943.01	77	81	59	27	19	30	1.59182	2.02195	1.25726	0.589332	0.453392	0.607283	0.000629712	-1.12401	down	[IQR]	Lipid transport and metabolism;; Secondary metabolites biosynthesis, transport and catabolism;; General function prediction only	Molecular Function: oxidoreductase activity (GO:0016491);;	K13070|1.3e-82|dosa:Os04t0179200-01|K13070 momilactone-A synthase [EC:1.1.1.295] | (RefSeq) Os04g0179200, MAS, MOMILACTONE_A_SYNTHASE; Similar to Stem secoisolariciresinol dehydrogenase (Fragment).	Diterpenoid biosynthesis (ko00904)	[R]	General function prediction only	Enoyl-(Acyl carrier protein) reductase	Secoisolariciresinol dehydrogenase (Fragment) OS=Forsythia intermedia OX=55183 PE=1 SV=1	Q	Secondary metabolites biosynthesis, transport and catabolism	unnamed protein product [Prunus armeniaca]
PaF106G0700028062.01	169	121	151	287	285	408	2.81763	2.40833	2.74624	5.20103	5.54082	6.80342	1.51663e-10	1.16098	up	--	--	Molecular Function: anaphase-promoting complex binding (GO:0010997);; Molecular Function: ubiquitin-protein transferase activator activity (GO:0097027);; Biological Process: positive regulation of ubiquitin protein ligase activity (GO:1904668);;	K03363|5.1e-29|pper:18770267|K03363 cell division cycle 20, cofactor of APC complex | (RefSeq) cell division cycle 20.1, cofactor of APC complex	Ubiquitin mediated proteolysis (ko04120)	[DO]	Cell cycle control, cell division, chromosome partitioning;; Posttranslational modification, protein turnover, chaperones	--	Cell division cycle 20.1, cofactor of APC complex OS=Arabidopsis thaliana OX=3702 GN=CDC20-1 PE=1 SV=1	--	--	Hypothetical predicted protein [Prunus dulcis]
PaF106G0200008345.01	61	33	51	344	318	298	0.360467	0.232728	0.311399	2.22008	2.19983	1.76761	2.60449e-31	2.55721	up	[R]	General function prediction only	Biological Process: signal transduction (GO:0007165);; Molecular Function: ADP binding (GO:0043531);;	K00695|2.6e-97|mtr:MTR_6g478030|K00695 sucrose synthase [EC:2.4.1.13] | (RefSeq) sucrose synthase	Starch and sucrose metabolism (ko00500)	--	--	TIR domain	Disease resistance protein RUN1 OS=Vitis rotundifolia OX=103349 GN=RUN1 PE=1 SV=1	S	Function unknown	TMV resistance protein N isoform X1 [Prunus persica]
PaF106G0400018078.01	152	108	103	218	313	228	1.90704	1.6025	1.31652	3.04609	4.57245	2.956	8.96153e-06	1.0542	up	[G]	Carbohydrate transport and metabolism	Molecular Function: catalytic activity (GO:0003824);; Biological Process: trehalose biosynthetic process (GO:0005992);;	K01087|8.0e-172|pmum:103333353|K01087 trehalose 6-phosphate phosphatase [EC:3.1.3.12] | (RefSeq) trehalose-phosphate phosphatase A	Starch and sucrose metabolism (ko00500)	[G]	Carbohydrate transport and metabolism	Trehalose-phosphatase	Trehalose-phosphate phosphatase A OS=Arabidopsis thaliana OX=3702 GN=TPPA PE=1 SV=1	G	Carbohydrate transport and metabolism	unnamed protein product [Prunus armeniaca]
PaF106G0500018981.01	965	872	881	342	304	450	12.9433	13.8212	12.2681	4.79869	4.61488	5.90882	6.15702e-21	-1.19731	down	--	--	Molecular Function: protein kinase activity (GO:0004672);; Molecular Function: ATP binding (GO:0005524);; Biological Process: brassinosteroid mediated signaling pathway (GO:0009742);;	K14500|6.0e-288|pmum:103336934|K14500 BR-signaling kinase [EC:2.7.11.1] | (RefSeq) probable serine/threonine-protein kinase At5g41260	Plant hormone signal transduction (ko04075)	--	--	Protein kinase domain	Serine/threonine-protein kinase BSK2 OS=Arabidopsis thaliana OX=3702 GN=BSK2 PE=1 SV=1	T	Signal transduction mechanisms	hypothetical protein PRUPE_5G041700 [Prunus persica]
PaF106G0800032661.01	0	6	5	75	73	85	0	0.042499	0.030595	0.49874	0.524214	0.525563	3.20815e-15	2.78215	up	--	--	Molecular Function: protein binding (GO:0005515);; Biological Process: signal transduction (GO:0007165);; Molecular Function: ADP binding (GO:0043531);;	K00695|1.6e-141|mtr:MTR_6g478030|K00695 sucrose synthase [EC:2.4.1.13] | (RefSeq) sucrose synthase	Starch and sucrose metabolism (ko00500)	--	--	TIR domain	Disease resistance protein Roq1 OS=Nicotiana benthamiana OX=4100 GN=ROQ1 PE=1 SV=1	T	Signal transduction mechanisms	TMV resistance protein N-like [Prunus avium]
PaF106G0300012152.01	14682	10719	12071	30866	30155	30438	225.6	197.109	191.324	516.196	540.861	468.263	4.3129e-52	1.36805	up	[G]	Carbohydrate transport and metabolism	Molecular Function: polygalacturonase activity (GO:0004650);; Cellular Component: extracellular region (GO:0005576);; Biological Process: carbohydrate metabolic process (GO:0005975);; Biological Process: cell wall organization (GO:0071555);;	K01213|3.0e-189|pmum:103329198|K01213 galacturan 1,4-alpha-galacturonidase [EC:3.2.1.67] | (RefSeq) exopolygalacturonase-like	Pentose and glucuronate interconversions (ko00040)	--	--	Glycosyl hydrolases family 28	Exopolygalacturonase (Fragment) OS=Oenothera organensis OX=3945 PE=2 SV=1	G	Carbohydrate transport and metabolism	exopolygalacturonase-like [Prunus dulcis]
PaF106G0300011491.01	48	47	46	9	22	12	0.696289	0.784307	0.803287	0.219203	0.620329	0.288679	0.00448549	-1.0765	down	--	--	Cellular Component: integral component of membrane (GO:0016021);;	K10798|9.1e-24|pavi:110763307|K10798 poly [ADP-ribose] polymerase 2/3/4 [EC:2.4.2.30] | (RefSeq) poly [ADP-ribose] polymerase 3 isoform X1	Base excision repair (ko03410)	--	--	PADR1 (NUC008) domain	Protein ADP-ribosyltransferase PARP3 OS=Glycine max OX=3847 GN=PARP3 PE=2 SV=1	H	Coenzyme transport and metabolism	poly [ADP-ribose] polymerase 3-like [Prunus persica]
PaF106G0300013028.01	104	114	81	0	2	4	1.32965	1.73905	1.06216	0	0.029782	0.044788	1.76844e-21	-3.31066	down	--	--	Molecular Function: nucleic acid binding (GO:0003676);; Molecular Function: RNA-directed DNA polymerase activity (GO:0003964);; Molecular Function: zinc ion binding (GO:0008270);; Biological Process: DNA integration (GO:0015074);;	K03006|1.2e-87|adu:107466525|K03006 DNA-directed RNA polymerase II subunit RPB1 [EC:2.7.7.6] | (RefSeq) LOW QUALITY PROTEIN: DNA-directed RNA polymerase II subunit 1-like	RNA polymerase (ko03020)	[R]	General function prediction only	gag-polypeptide of LTR copia-type	Retrovirus-related Pol polyprotein from transposon TNT 1-94 OS=Nicotiana tabacum OX=4097 PE=2 SV=1	O	Posttranslational modification, protein turnover, chaperones	putative RNA-directed DNA polymerase [Rosa chinensis]
PaF106G0400017037.01	593	377	334	17	38	43	11.6417	8.84154	6.76591	0.343244	0.864034	0.828773	3.10618e-36	-3.14538	down	--	--	--	K00641|1.2e-12|ppp:112286322|K00641 homoserine O-acetyltransferase/O-succinyltransferase [EC:2.3.1.31 2.3.1.46] | (RefSeq) uncharacterized protein LOC112286322	Cysteine and methionine metabolism (ko00270);; Sulfur metabolism (ko00920);; Biosynthesis of amino acids (ko01230)	--	--	Myb/SANT-like DNA-binding domain	--	S	Function unknown	unnamed protein product [Prunus armeniaca]
PaF106G0100002813.01	27	14	12	126	98	104	0.358325	0.222891	0.152809	1.82253	1.52667	1.38348	4.52487e-12	2.14256	up	[QV]	Secondary metabolites biosynthesis, transport and catabolism;; Defense mechanisms	Molecular Function: monooxygenase activity (GO:0004497);; Molecular Function: iron ion binding (GO:0005506);; Cellular Component: integral component of membrane (GO:0016021);; Molecular Function: oxidoreductase activity, acting on paired donors, with incorporation or reduction of molecular oxygen (GO:0016705);; Molecular Function: heme binding (GO:0020037);;	K23810|7.5e-172|vvi:100232891|K23810 (E)-8-carboxylinalool synthase [EC:1.14.14.-] | (RefSeq) GFH2; ripening-related P-450 enzyme-like	Monoterpenoid biosynthesis (ko00902)	[Q]	Secondary metabolites biosynthesis, transport and catabolism	Cytochrome P450	Geraniol 8-hydroxylase OS=Catharanthus roseus OX=4058 GN=CYP76B6 PE=1 SV=1	Q	Secondary metabolites biosynthesis, transport and catabolism	unnamed protein product [Prunus armeniaca]
PaF106G0700027122.01	27	20	45	93	81	118	0.867371	0.760637	1.50618	3.30462	3.11326	3.87774	6.55609e-06	1.40019	up	--	--	--	K03860|4.3e-09|nnu:104608881|K03860 phosphatidylinositol N-acetylglucosaminyltransferase subunit Q | (RefSeq) N-acetylglucosaminyl-phosphatidylinositol biosynthetic protein gpi1-like	Glycosylphosphatidylinositol (GPI)-anchor biosynthesis (ko00563)	--	--	Gibberellin regulated protein	Snakin-2 OS=Solanum tuberosum OX=4113 GN=SN2 PE=1 SV=1	S	Function unknown	unnamed protein product [Prunus armeniaca]
PaF106G0100006571.01	58	42	44	16	22	8	2.81527	2.4122	2.18892	0.805381	1.24792	0.352646	0.00847748	-1.00762	down	--	--	Molecular Function: methyltransferase activity (GO:0008168);;	K14568|4.2e-21|pmum:103319213|K14568 rRNA small subunit pseudouridine methyltransferase Nep1 [EC:2.1.1.260] | (RefSeq) ribosomal RNA small subunit methyltransferase NEP1-like	Ribosome biogenesis in eukaryotes (ko03008)	--	--	EMG1/NEP1 methyltransferase	--	J	Translation, ribosomal structure and biogenesis	ribosomal RNA small subunit methyltransferase NEP1-like [Prunus dulcis]
PaF106G0200010731.01	1	0	0	164	130	122	0.011275	0	0	3.07952	2.59933	2.10649	1.5471e-36	4.27377	up	--	--	--	K03097|4.1e-15|hbr:110638242|K03097 casein kinase II subunit alpha [EC:2.7.11.1] | (RefSeq) casein kinase II subunit alpha-4, chloroplastic-like	Ribosome biogenesis in eukaryotes (ko03008);; Circadian rhythm - plant (ko04712)	--	--	gag-polypeptide of LTR copia-type	--	S	Function unknown	PREDICTED: uncharacterized protein LOC103322584 [Prunus mume]
PaF106G0200006848.01	2017	1507	1894	375	401	414	14.3746	12.851	13.9237	2.90844	3.33485	2.94779	2.79651e-77	-2.04203	down	--	--	Molecular Function: oxidoreductase activity, acting on single donors with incorporation of molecular oxygen, incorporation of two atoms of oxygen (GO:0016702);; Biological Process: oxylipin biosynthetic process (GO:0031408);; Molecular Function: metal ion binding (GO:0046872);;	K00454|0.0e+00|pmum:103330513|K00454 lipoxygenase [EC:1.13.11.12] | (RefSeq) linoleate 13S-lipoxygenase 2-1, chloroplastic-like	Linoleic acid metabolism (ko00591);; alpha-Linolenic acid metabolism (ko00592)	--	--	Lipoxygenase	Linoleate 13S-lipoxygenase 2-1, chloroplastic OS=Solanum tuberosum OX=4113 GN=LOX2.1 PE=1 SV=1	E	Amino acid transport and metabolism	PREDICTED: linoleate 13S-lipoxygenase 2-1, chloroplastic-like [Prunus mume]
PaF106G0800030444.01	24	12	14	68	44	56	0.302015	0.184201	0.175918	0.957977	0.668285	0.724548	0.000161764	1.33199	up	[P]	Inorganic ion transport and metabolism	Molecular Function: N,N-dimethylaniline monooxygenase activity (GO:0004499);; Molecular Function: flavin adenine dinucleotide binding (GO:0050660);; Molecular Function: NADP binding (GO:0050661);;	K11816|4.8e-17|pxb:103955340|K11816 indole-3-pyruvate monooxygenase [EC:1.14.13.168] | (RefSeq) probable indole-3-pyruvate monooxygenase YUCCA3	Tryptophan metabolism (ko00380)	[Q]	Secondary metabolites biosynthesis, transport and catabolism	Flavin-binding monooxygenase-like	Probable flavin-containing monooxygenase 1 OS=Arabidopsis thaliana OX=3702 GN=FMO1 PE=2 SV=1	Q	Secondary metabolites biosynthesis, transport and catabolism	unnamed protein product [Prunus armeniaca]
PaF106G0200007246.01	929	1033	994	266	442	547	3.79868	4.40161	3.85026	1.14478	1.90746	1.91647	1.46829e-08	-1.09125	down	[R]	General function prediction only	Molecular Function: ADP binding (GO:0043531);;	K12818|3.9e-206|mtr:MTR_0267s0070|K12818 ATP-dependent RNA helicase DHX8/PRP22 [EC:3.6.4.13] | (RefSeq) NB-ARC domain disease resistance protein, putative	Spliceosome (ko03040)	[T]	Signal transduction mechanisms	NB-ARC domain	Putative disease resistance RPP13-like protein 1 OS=Arabidopsis thaliana OX=3702 GN=RPPL1 PE=3 SV=1	T	Signal transduction mechanisms	putative disease resistance RPP13-like protein 1 isoform X3 [Prunus dulcis]
PaF106G0800031067.01	194	139	156	53	60	60	2.51318	2.14919	2.08397	0.741118	0.899047	0.771594	2.03479e-07	-1.24862	down	--	--	Biological Process: embryo development ending in seed dormancy (GO:0009793);;	K01183|1.3e-08|zju:107406488|K01183 chitinase [EC:3.2.1.14] | (RefSeq) pentatricopeptide repeat-containing protein At1g62350-like isoform X1	Amino sugar and nucleotide sugar metabolism (ko00520)	[R]	General function prediction only	PPR repeat family	Pentatricopeptide repeat-containing protein At4g39620, chloroplastic OS=Arabidopsis thaliana OX=3702 GN=EMB2453 PE=2 SV=1	S	Function unknown	pentatricopeptide repeat-containing protein At4g39620, chloroplastic [Prunus persica]
PaF106G0400015872.01	199	145	172	42	56	78	2.04362	1.77797	1.8888	0.462622	0.668395	0.79927	1.86995e-07	-1.29616	down	--	--	Molecular Function: magnesium ion binding (GO:0000287);; Molecular Function: terpene synthase activity (GO:0010333);;	K15803|2.0e-308|pavi:110768307|K15803 (-)-germacrene D synthase [EC:4.2.3.75] | (RefSeq) (-)-alpha-pinene synthase-like isoform X1	Sesquiterpenoid and triterpenoid biosynthesis (ko00909)	--	--	Terpene synthase family, metal binding domain	(-)-alpha-pinene synthase OS=Fragaria vesca OX=57918 PE=1 SV=2	S	Function unknown	PREDICTED: (-)-alpha-pinene synthase-like [Prunus mume]
PaF106G0600024254.01	185	159	88	40	52	59	4.0076	4.11324	1.95607	0.945286	1.31482	1.27191	7.32239e-05	-1.18308	down	--	--	Molecular Function: iron ion binding (GO:0005506);; Cellular Component: membrane (GO:0016020);; Cellular Component: integral component of membrane (GO:0016021);; Molecular Function: oxidoreductase activity, acting on paired donors, with incorporation or reduction of molecular oxygen, NAD(P)H as one donor, and incorporation of one atom of oxygen (GO:0016709);; Molecular Function: heme binding (GO:…	K13260|5.4e-165|pmum:103337257|K13260 isoflavone/4'-methoxyisoflavone 2'-hydroxylase [EC:1.14.14.90 1.14.14.89] | (RefSeq) isoflavone 3'-hydroxylase-like	Isoflavonoid biosynthesis (ko00943)	[Q]	Secondary metabolites biosynthesis, transport and catabolism	Cytochrome P450	Cytochrome P450 81E8 OS=Medicago truncatula OX=3880 GN=CYP81E8 PE=2 SV=1	Q	Secondary metabolites biosynthesis, transport and catabolism	unnamed protein product [Prunus armeniaca]
PaF106G0600021559.01	12	29	21	313	283	409	0.096838	0.283678	0.173877	2.86233	2.77488	3.44368	7.82342e-46	3.51778	up	--		Molecular Function: protein serine/threonine kinase activity (GO:0004674);; Molecular Function: ATP binding (GO:0005524);; Cellular Component: integral component of membrane (GO:0016021);; Molecular Function: carbohydrate binding (GO:0030246);; Biological Process: recognition of pollen (GO:0048544);;	K13416|3.3e-57|mdm:103416332|K13416 brassinosteroid insensitive 1-associated receptor kinase 1 [EC:2.7.10.1 2.7.11.1] | (RefSeq) BRASSINOSTEROID INSENSITIVE 1-associated receptor kinase 1-like isoform X1	MAPK signaling pathway - plant (ko04016);; Plant hormone signal transduction (ko04075);; Plant-pathogen interaction (ko04626)	--	--	Protein kinase domain	G-type lectin S-receptor-like serine/threonine-protein kinase RLK1 OS=Arabidopsis thaliana OX=3702 GN=RLK1 PE=2 SV=2	T	Signal transduction mechanisms	PREDICTED: G-type lectin S-receptor-like serine/threonine-protein kinase RLK1 [Prunus mume]
PaF106G0400016502.01	53	61	56	4	2	2	1.32524	1.81621	1.45392	0.090106	0.056111	0.025347	1.73033e-11	-2.46695	down	[O]	Posttranslational modification, protein turnover, chaperones	Molecular Function: glutathione transferase activity (GO:0004364);; Cellular Component: cytoplasm (GO:0005737);; Biological Process: glutathione metabolic process (GO:0006749);;	K00799|1.8e-119|pmum:103325850|K00799 glutathione S-transferase [EC:2.5.1.18] | (RefSeq) probable glutathione S-transferase	Glutathione metabolism (ko00480)	[O]	Posttranslational modification, protein turnover, chaperones	Glutathione S-transferase, N-terminal domain	Probable glutathione S-transferase parC OS=Nicotiana tabacum OX=4097 GN=PARC PE=2 SV=1	O	Posttranslational modification, protein turnover, chaperones	PREDICTED: probable glutathione S-transferase [Prunus mume]
PaF106G0600024011.01	998	781	817	3246	2492	2879	8.08593	7.59892	6.79286	28.5422	23.514	23.3245	2.25243e-53	1.77999	up	[HI]	Coenzyme transport and metabolism;; Lipid transport and metabolism	Molecular Function: 1-deoxy-D-xylulose-5-phosphate synthase activity (GO:0008661);; Biological Process: terpenoid biosynthetic process (GO:0016114);; Molecular Function: transferase activity, transferring aldehyde or ketonic groups (GO:0016744);;	K01662|0.0e+00|pavi:110746271|K01662 1-deoxy-D-xylulose-5-phosphate synthase [EC:2.2.1.7] | (RefSeq) probable 1-deoxy-D-xylulose-5-phosphate synthase 2, chloroplastic isoform X1	Thiamine metabolism (ko00730);; Terpenoid backbone biosynthesis (ko00900)	[G]	Carbohydrate transport and metabolism	1-deoxy-D-xylulose-5-phosphate synthase	Probable 1-deoxy-D-xylulose-5-phosphate synthase 2, chloroplastic OS=Oryza sativa subsp. japonica OX=39947 GN=Os07g0190000 PE=2 SV=1	G	Carbohydrate transport and metabolism	unnamed protein product [Prunus armeniaca]
PaF106G0100003015.01	257	99	194	15	6	27	3.71089	1.71054	2.88353	0.229105	0.099745	0.390416	1.93769e-15	-2.56326	down	[G]	Carbohydrate transport and metabolism	Molecular Function: polygalacturonase activity (GO:0004650);; Cellular Component: extracellular region (GO:0005576);; Biological Process: carbohydrate metabolic process (GO:0005975);; Biological Process: cell wall organization (GO:0071555);;	K01213|1.7e-263|pmum:103321801|K01213 galacturan 1,4-alpha-galacturonidase [EC:3.2.1.67] | (RefSeq) polygalacturonase At1g48100	Pentose and glucuronate interconversions (ko00040)	--	--	Glycosyl hydrolases family 28	Polygalacturonase At1g48100 OS=Arabidopsis thaliana OX=3702 GN=At1g48100 PE=2 SV=1	G	Carbohydrate transport and metabolism	PREDICTED: polygalacturonase At1g48100 [Prunus mume]
PaF106G0400017421.01	168	129	101	251	276	336	1.00443	1.06976	0.620289	1.70213	1.99802	2.23871	8.95242e-08	1.10874	up	[T]	Signal transduction mechanisms	Molecular Function: protein kinase activity (GO:0004672);; Molecular Function: ATP binding (GO:0005524);; Cellular Component: endosome (GO:0005768);; Cellular Component: plasma membrane (GO:0005886);; Biological Process: receptor-mediated endocytosis (GO:0006898);; Biological Process: regulation of anion channel activity (GO:0010359);; Cellular Component: integral component of membrane (GO:001602…	K13420|2.2e-226|pavi:110766585|K13420 LRR receptor-like serine/threonine-protein kinase FLS2 [EC:2.7.11.1] | (RefSeq) LRR receptor-like serine/threonine-protein kinase FLS2	MAPK signaling pathway - plant (ko04016);; Plant-pathogen interaction (ko04626)	--	--	Protein kinase domain	LRR receptor-like serine/threonine-protein kinase FLS2 OS=Arabidopsis thaliana OX=3702 GN=FLS2 PE=1 SV=1	T	Signal transduction mechanisms	unnamed protein product [Prunus armeniaca]
PaF106G0100003928.01	1984	1593	2002	4867	4032	5049	43.4419	40.5731	43.7716	118.281	104.173	114.13	1.35841e-54	1.39056	up	[T]	Signal transduction mechanisms	Biological Process: response to acid chemical (GO:0001101);; Molecular Function: molecular_function (GO:0003674);; Molecular Function: catalytic activity (GO:0003824);; Biological Process: response to stress (GO:0006950);; Biological Process: biological_process (GO:0008150);; Biological Process: response to water deprivation (GO:0009414);; Biological Process: response to water (GO:0009415);; Biol…	K17991|3.3e-112|pmum:103321432|K17991 peroxygenase [EC:1.11.2.3] | (RefSeq) probable peroxygenase 4	Cutin, suberine and wax biosynthesis (ko00073)	--	--	Caleosin related protein	Probable peroxygenase 4 OS=Arabidopsis thaliana OX=3702 GN=PXG4 PE=1 SV=1	S	Function unknown	unnamed protein product [Prunus armeniaca]
PaF106G0200009704.01	274	278	282	84	90	132	3.13408	3.79529	2.84545	1.05431	1.14785	1.51639	4.46504e-10	-1.27012	down	[G]	Carbohydrate transport and metabolism	Molecular Function: beta-N-acetylhexosaminidase activity (GO:0004563);; Biological Process: carbohydrate metabolic process (GO:0005975);; Molecular Function: N-acetyl-beta-D-galactosaminidase activity (GO:0102148);;	K12373|3.1e-231|pmum:103343509|K12373 hexosaminidase [EC:3.2.1.52] | (RefSeq) beta-hexosaminidase 1	Other glycan degradation (ko00511);; Various types of N-glycan biosynthesis (ko00513);; Amino sugar and nucleotide sugar metabolism (ko00520);; Glycosaminoglycan degradation (ko00531);; Glycosphingolipid biosynthesis - globo and isoglobo series (ko00603);; Glycosphingolipid biosynthesis - ganglio series (ko00604)	[G]	Carbohydrate transport and metabolism	Glycosyl hydrolase family 20, catalytic domain	Beta-hexosaminidase 1 OS=Arabidopsis thaliana OX=3702 GN=HEXO1 PE=1 SV=1	G	Carbohydrate transport and metabolism	PREDICTED: beta-hexosaminidase 1 [Prunus mume]
PaF106G0300012916.01	110	56	76	12	30	21	1.8031	1.09399	1.28212	0.212685	0.569978	0.343552	0.000119322	-1.33536	down	[Q]	Secondary metabolites biosynthesis, transport and catabolism	Molecular Function: hydrolase activity (GO:0016787);;	K08726|9.8e-24|sbi:8071538|K08726 soluble epoxide hydrolase / lipid-phosphate phosphatase [EC:3.3.2.10 3.1.3.76] | (RefSeq) uncharacterized protein LOC8071538	Arachidonic acid metabolism (ko00590);; Peroxisome (ko04146)	[I]	Lipid transport and metabolism	alpha/beta hydrolase fold	--	I	Lipid transport and metabolism	unnamed protein product [Prunus armeniaca]
PaF106G0100003916.01	2042	1734	1620	529	587	858	25.2848	25.6906	20.6909	7.12219	8.4858	10.63	1.92432e-23	-1.33159	down	[G]	Carbohydrate transport and metabolism	Molecular Function: cellulase activity (GO:0008810);; Biological Process: cellulose catabolic process (GO:0030245);;	K01179|1.4e-292|pmum:103321421|K01179 endoglucanase [EC:3.2.1.4] | (RefSeq) endoglucanase 8	Starch and sucrose metabolism (ko00500)	--	--	Glycosyl hydrolase family 9	Endoglucanase 8 OS=Arabidopsis thaliana OX=3702 GN=CEL1 PE=2 SV=1	G	Carbohydrate transport and metabolism	PREDICTED: endoglucanase 8 [Prunus mume]
PaF106G0500019002.01	131	176	152	26	13	27	1.99653	3.19789	2.38475	0.425205	0.229639	0.410403	2.49443e-14	-2.22351	down	--	--	Molecular Function: catalytic activity (GO:0003824);;	K15631|8.0e-20|ppp:112289964|K15631 molybdenum cofactor sulfurtransferase [EC:2.8.1.9] | (RefSeq) molybdenum cofactor sulfurase-like	Folate biosynthesis (ko00790)	--	--	--	--	H	Coenzyme transport and metabolism	unnamed protein product [Prunus armeniaca]
PaF106G0500021374.01	94	48	85	162	180	182	2.26018	1.47237	2.32061	4.47449	5.50472	4.74958	2.44911e-06	1.16474	up	[R]	General function prediction only	Molecular Function: zinc ion binding (GO:0008270);; Molecular Function: oxidoreductase activity (GO:0016491);;	K00001|5.8e-19|pmum:103338849|K00001 alcohol dehydrogenase [EC:1.1.1.1] | (RefSeq) alcohol dehydrogenase-like 6 isoform X1	Glycolysis / Gluconeogenesis (ko00010);; Fatty acid degradation (ko00071);; Tyrosine metabolism (ko00350)	[Q]	Secondary metabolites biosynthesis, transport and catabolism	--	Alcohol dehydrogenase-like 6 OS=Arabidopsis thaliana OX=3702 GN=At5g24760 PE=2 SV=2	Q	Secondary metabolites biosynthesis, transport and catabolism	unnamed protein product [Prunus armeniaca]
PaF106G0200007121.01	72	72	62	267	160	266	0.880551	1.05023	0.777807	3.57425	2.30011	3.28384	7.15657e-12	1.62424	up	[C]	Energy production and conversion	Biological Process: cytokinin metabolic process (GO:0009690);; Molecular Function: cytokinin dehydrogenase activity (GO:0019139);; Molecular Function: FAD binding (GO:0071949);;	K00279|1.5e-311|pper:18784595|K00279 cytokinin dehydrogenase [EC:1.5.99.12] | (RefSeq) cytokinin dehydrogenase 6	Zeatin biosynthesis (ko00908)	[C]	Energy production and conversion	Cytokinin dehydrogenase 1, FAD and cytokinin binding	Cytokinin dehydrogenase 6 OS=Arabidopsis thaliana OX=3702 GN=CKX6 PE=2 SV=2	C	Energy production and conversion	unnamed protein product [Prunus armeniaca]
PaF106G0500020431.01	517	518	647	1973	1404	1933	6.39021	7.67021	8.31627	26.5331	20.2482	23.9474	1.21683e-33	1.67572	up	[QV]	Secondary metabolites biosynthesis, transport and catabolism;; Defense mechanisms	Molecular Function: iron ion binding (GO:0005506);; Cellular Component: membrane (GO:0016020);; Molecular Function: oxidoreductase activity, acting on paired donors, with incorporation or reduction of molecular oxygen, NAD(P)H as one donor, and incorporation of one atom of oxygen (GO:0016709);; Molecular Function: heme binding (GO:0020037);;	K00495|3.6e-283|pavi:110745870|K00495 phenylacetaldehyde oxime monooxygenase [EC:1.14.14.44] | (RefSeq) cytochrome P450 71A1-like	Cyanoamino acid metabolism (ko00460)	[Q]	Secondary metabolites biosynthesis, transport and catabolism	Cytochrome P450	Phenylacetaldehyde oxime monooxygenase CYP71AN24 OS=Prunus mume OX=102107 GN=CYP71AN24 PE=1 SV=1	Q	Secondary metabolites biosynthesis, transport and catabolism	PREDICTED: cytochrome P450 71A1-like [Prunus mume]
PaF106G0100004453.01	4259	3392	3967	1659	1631	2089	66.8125	63.6716	64.1989	28.3269	29.8614	32.812	4.16393e-38	-1.01342	down	[M]	Cell wall/membrane/envelope biogenesis	Molecular Function: catalytic activity (GO:0003824);;	K13082|9.0e-198|pper:18788884|K13082 bifunctional dihydroflavonol 4-reductase/flavanone 4-reductase [EC:1.1.1.219 1.1.1.234] | (RefSeq) bifunctional dihydroflavonol 4-reductase/flavanone 4-reductase	Flavonoid biosynthesis (ko00941)	[V]	Defense mechanisms	NAD dependent epimerase/dehydratase family	Bifunctional dihydroflavonol 4-reductase/flavanone 4-reductase OS=Pyrus communis OX=23211 GN=DFR PE=1 SV=1	V	Defense mechanisms	unnamed protein product [Prunus armeniaca]
PaF106G0600022413.01	150	106	168	307	243	295	0.960725	0.809788	1.11167	2.40058	1.96348	1.9974	5.16457e-07	1.01108	up	--	--	Molecular Function: protein kinase activity (GO:0004672);; Molecular Function: ATP binding (GO:0005524);; Cellular Component: integral component of membrane (GO:0016021);;	K13435|7.7e-51|spen:107018783|K13435 serine/threonine-protein kinase Pto | (RefSeq) receptor-like protein kinase HERK 1 isoform X2	Plant-pathogen interaction (ko04626)	[T]	Signal transduction mechanisms	Malectin-like domain	Receptor-like protein kinase HERK 1 OS=Arabidopsis thaliana OX=3702 GN=HERK1 PE=1 SV=1	T	Signal transduction mechanisms	unnamed protein product [Prunus armeniaca]
PaF106G0500020009.01	708	531	695	111	204	222	4.65903	4.17882	4.71604	0.79276	1.56099	1.45823	3.42083e-16	-1.6264	down	--	--	Molecular Function: ADP binding (GO:0043531);;	K13415|9.1e-150|mdm:103413440|K13415 protein brassinosteroid insensitive 1 [EC:2.7.10.1 2.7.11.1] | (RefSeq) uncharacterized protein LOC103413440 isoform X1	Plant hormone signal transduction (ko04075)	--	--	Arabidopsis broad-spectrum mildew resistance protein RPW8	Probable disease resistance protein At5g66900 OS=Arabidopsis thaliana OX=3702 GN=At5g66900 PE=3 SV=1	T	Signal transduction mechanisms	unnamed protein product [Prunus armeniaca]
PaF106G0400016595.01	4957	3323	4483	782	763	1157	61.8257	49.8408	57.8232	10.5851	11.0794	14.4065	1.00208e-69	-2.09736	down	--	--	Molecular Function: transferase activity, transferring acyl groups other than amino-acyl groups (GO:0016747);;	K13065|3.8e-98|pavi:110771447|K13065 shikimate O-hydroxycinnamoyltransferase [EC:2.3.1.133] | (RefSeq) BAHD acyltransferase At5g47980-like	Phenylpropanoid biosynthesis (ko00940);; Flavonoid biosynthesis (ko00941);; Stilbenoid, diarylheptanoid and gingerol biosynthesis (ko00945)	--	--	Transferase family	Salutaridinol 7-O-acetyltransferase OS=Papaver somniferum OX=3469 GN=SALAT PE=1 SV=1	S	Function unknown	benzyl alcohol acetyltransferase 36 [Prunus mume var. mume]
PaF106G0100005745.01	405	196	324	19	27	11	6.52132	3.77642	5.38024	0.317116	0.492544	0.164245	3.56121e-30	-3.18507	down	--	--	Molecular Function: hydrolase activity, acting on ester bonds (GO:0016788);;	K01206|4.4e-61|eus:EUTSA_v10018726mg|K01206 alpha-L-fucosidase [EC:3.2.1.51] | (RefSeq) hypothetical protein	Other glycan degradation (ko00511)	--	--	GDSL-like Lipase/Acylhydrolase	Esterase OS=Hevea brasiliensis OX=3981 PE=1 SV=1	S	Function unknown	PREDICTED: LOW QUALITY PROTEIN: uncharacterized protein LOC103319914 [Prunus mume]
PaF106G0100000980.01	11	6	9	177	177	240	0.232171	0.157178	0.196587	4.21124	4.50418	5.24125	2.72841e-40	3.70609	up	[O]	Posttranslational modification, protein turnover, chaperones	Molecular Function: protein serine/threonine kinase activity (GO:0004674);; Molecular Function: ATP binding (GO:0005524);; Cellular Component: cytoplasm (GO:0005737);; Biological Process: regulation of mitotic cell cycle (GO:0007346);; Biological Process: signal transduction by protein phosphorylation (GO:0023014);; Biological Process: stress-activated protein kinase signaling cascade (GO:0031098…	K20604|4.6e-103|pavi:110753466|K20604 mitogen-activated protein kinase kinase 9 [EC:2.7.12.2] | (RefSeq) mitogen-activated protein kinase kinase 9-like	MAPK signaling pathway - plant (ko04016)	[T]	Signal transduction mechanisms	Protein kinase domain	Mitogen-activated protein kinase kinase 9 OS=Arabidopsis thaliana OX=3702 GN=MKK9 PE=1 SV=1	T	Signal transduction mechanisms	unnamed protein product [Prunus armeniaca]
PaF106G0200010558.01	1371	988	940	158	137	134	16.1855	13.9577	11.4408	2.02098	1.88415	1.58135	8.02236e-65	-2.70062	down	[G]	Carbohydrate transport and metabolism	Molecular Function: polygalacturonase activity (GO:0004650);; Cellular Component: extracellular region (GO:0005576);; Biological Process: carbohydrate metabolic process (GO:0005975);; Molecular Function: lyase activity (GO:0016829);; Biological Process: cell wall organization (GO:0071555);;	K01184|4.6e-28|csat:104772314|K01184 polygalacturonase [EC:3.2.1.15] | (RefSeq) probable polygalacturonase At3g15720	Pentose and glucuronate interconversions (ko00040)	--	--	Glycosyl hydrolases family 28	Probable polygalacturonase OS=Vitis vinifera OX=29760 GN=GSVIVT00026920001 PE=1 SV=1	G	Carbohydrate transport and metabolism	unnamed protein product [Prunus armeniaca]
PaF106G0600023320.01	153	153	120	63	52	62	3.41962	4.09333	2.74803	1.53266	1.35367	1.38693	5.87774e-05	-1.03865	down	--	--	Molecular Function: protein dimerization activity (GO:0046983);;	K12126|1.2e-07|obr:102711850|K12126 phytochrome-interacting factor 3 | (RefSeq) transcription factor APG-like	Plant hormone signal transduction (ko04075);; Circadian rhythm - plant (ko04712)	--	--	Helix-loop-helix DNA-binding domain	Transcription factor HEC3 OS=Arabidopsis thaliana OX=3702 GN=HEC3 PE=1 SV=1	K	Transcription	unnamed protein product [Prunus armeniaca]
Prunus_sibirica_newGene_1467	24	17	14	42	79	104	0.498536	0.418133	0.338226	0.48997	0.98631	1.10361	9.90526e-06	1.52977	up	--	--	Molecular Function: helicase activity (GO:0004386);; Molecular Function: ATP binding (GO:0005524);;	K12813|1.5e-109|pavi:110750979|K12813 pre-mRNA-splicing factor ATP-dependent RNA helicase DHX16 [EC:3.6.4.13] | (RefSeq) pre-mRNA-splicing factor ATP-dependent RNA helicase DEAH1-like	Spliceosome (ko03040)	[A]	RNA processing and modification	--	Pre-mRNA-splicing factor ATP-dependent RNA helicase DEAH1 OS=Arabidopsis thaliana OX=3702 GN=ESP3 PE=1 SV=1	A	RNA processing and modification	unnamed protein product [Prunus armeniaca]
PaF106G0600023099.01	564	445	440	1216	1200	1517	7.91779	7.68837	6.63779	19.5771	20.8402	22.5728	3.58875e-41	1.49119	up	[R]	General function prediction only	Molecular Function: oxidoreductase activity (GO:0016491);;	K01456|3.8e-161|pper:18774423|K01456 peptide-N4-(N-acetyl-beta-glucosaminyl)asparagine amidase [EC:3.5.1.52] | (RefSeq) peptide-N(4)-(N-acetyl-beta- glucosaminyl)asparagine amidase isoform X1	Protein processing in endoplasmic reticulum (ko04141)	[C]	Energy production and conversion	Aldo/keto reductase family	Probable aldo-keto reductase 1 OS=Glycine max OX=3847 GN=AKR1 PE=2 SV=1	C	Energy production and conversion	hypothetical protein PRUPE_6G141300 [Prunus persica]
PaF106G0600021580.01	901	697	723	97	87	120	10.9598	10.1485	9.07614	1.27748	1.23266	1.4577	3.88849e-73	-2.71997	down	[G]	Carbohydrate transport and metabolism	Biological Process: carbohydrate metabolic process (GO:0005975);; Molecular Function: beta-glucosidase activity (GO:0008422);; Biological Process: response to salt stress (GO:0009651);; Biological Process: glucosinolate catabolic process (GO:0019762);;	K01188|5.1e-80|pper:18774589|K01188 beta-glucosidase [EC:3.2.1.21] | (RefSeq) beta-glucosidase 13	Cyanoamino acid metabolism (ko00460);; Starch and sucrose metabolism (ko00500);; Phenylpropanoid biosynthesis (ko00940)	[G]	Carbohydrate transport and metabolism	Glycosyl hydrolase family 1	Non-cyanogenic beta-glucosidase OS=Trifolium repens OX=3899 PE=1 SV=1	G	Carbohydrate transport and metabolism	hypothetical protein PRUPE_6G018800 [Prunus persica]
PaF106G0600023262.01	1298	1055	1370	209	233	295	13.5759	13.2011	14.7775	2.37693	2.84283	3.08946	3.3547e-65	-2.18113	down	[DPM]	Cell cycle control, cell division, chromosome partitioning;; Inorganic ion transport and metabolism;; Cell wall/membrane/envelope biogenesis	Molecular Function: copper ion binding (GO:0005507);; Cellular Component: extracellular region (GO:0005576);; Molecular Function: oxidoreductase activity (GO:0016491);;	K00423|4.1e-182|pmum:103330351|K00423 L-ascorbate oxidase [EC:1.10.3.3] | (RefSeq) L-ascorbate oxidase-like	Ascorbate and aldarate metabolism (ko00053)	[Q]	Secondary metabolites biosynthesis, transport and catabolism	Multicopper oxidase	L-ascorbate oxidase OS=Nicotiana tabacum OX=4097 GN=AAO PE=2 SV=1	Q	Secondary metabolites biosynthesis, transport and catabolism	unnamed protein product [Prunus armeniaca]
PaF106G0400016580.01	177	144	169	0	0	0	11.3572	11.0759	11.1968	0	0	0	5.55463e-42	-4.52667	down	--	--	Molecular Function: transferase activity, transferring acyl groups other than amino-acyl groups (GO:0016747);;	K13065|5.0e-14|pavi:110771447|K13065 shikimate O-hydroxycinnamoyltransferase [EC:2.3.1.133] | (RefSeq) BAHD acyltransferase At5g47980-like	Phenylpropanoid biosynthesis (ko00940);; Flavonoid biosynthesis (ko00941);; Stilbenoid, diarylheptanoid and gingerol biosynthesis (ko00945)	--	--	Transferase family	--	S	Function unknown	BAHD acyltransferase At5g47980-like [Prunus dulcis]
PaF106G0400015614.01	185	188	203	0	0	0	2.35998	2.87418	2.6736	0	0	0	4.16188e-47	-4.73806	down	--	--	Molecular Function: protein binding (GO:0005515);;	K04079|5.4e-13|pvu:PHAVU_006G031400g|K04079 molecular chaperone HtpG | (RefSeq) hypothetical protein	Protein processing in endoplasmic reticulum (ko04141);; Plant-pathogen interaction (ko04626)	--	--	F-box domain	F-box/kelch-repeat protein At3g23880 OS=Arabidopsis thaliana OX=3702 GN=At3g23880 PE=2 SV=1	S	Function unknown	F-box/kelch-repeat protein At3g23880-like [Prunus dulcis]
PaF106G0800032875.01	0	7	4	88	96	127	0	0.061232	0.025986	0.69618	0.815796	0.924507	9.75153e-21	3.17621	up	[R]	General function prediction only	Biological Process: signal transduction (GO:0007165);; Molecular Function: ADP binding (GO:0043531);;	K00695|9.4e-125|mtr:MTR_6g478030|K00695 sucrose synthase [EC:2.4.1.13] | (RefSeq) sucrose synthase	Starch and sucrose metabolism (ko00500)	--	--	TIR domain	Disease resistance protein RUN1 OS=Vitis rotundifolia OX=103349 GN=RUN1 PE=1 SV=1	S	Function unknown	TMV resistance protein N isoform X1 [Prunus persica]
PaF106G0700028629.01	89	76	59	242	269	327	1.87158	1.8619	1.27476	4.75375	5.3584	5.99411	3.23625e-18	1.81747	up	[T]	Signal transduction mechanisms	Molecular Function: protein kinase activity (GO:0004672);; Molecular Function: ATP binding (GO:0005524);;	K13414|5.4e-79|pop:7460930|K13414 mitogen-activated protein kinase kinase kinase 1 [EC:2.7.11.25] | (RefSeq) mitogen-activated protein kinase kinase kinase 1	MAPK signaling pathway - plant (ko04016);; Plant-pathogen interaction (ko04626)	[T]	Signal transduction mechanisms	Protein kinase domain	Mitogen-activated protein kinase kinase kinase 1 OS=Arabidopsis thaliana OX=3702 GN=MEKK1 PE=1 SV=2	T	Signal transduction mechanisms	PREDICTED: mitogen-activated protein kinase kinase kinase 1-like isoform X2 [Prunus mume]
PaF106G0400016566.01	14	21	43	63	70	71	0.212353	0.38621	0.683448	1.05041	1.26779	1.09912	0.00326498	1.06031	up	--	--	Molecular Function: transferase activity, transferring acyl groups other than amino-acyl groups (GO:0016747);;	K13065|1.1e-66|cic:CICLE_v10001106mg|K13065 shikimate O-hydroxycinnamoyltransferase [EC:2.3.1.133] | (RefSeq) hypothetical protein	Phenylpropanoid biosynthesis (ko00940);; Flavonoid biosynthesis (ko00941);; Stilbenoid, diarylheptanoid and gingerol biosynthesis (ko00945)	--	--	Transferase family	(13S,14R)-1,13-dihydroxy-N-methylcanadine 13-O-acetyltransferase AT1 OS=Papaver somniferum OX=3469 GN=AT1 PE=1 SV=1	S	Function unknown	PREDICTED: BAHD acyltransferase At5g47980-like [Prunus mume]
PaF106G0800031608.01	393	237	278	646	817	788	7.47248	5.92647	5.7109	12.5678	17.0397	14.0351	4.78131e-16	1.34389	up	--	--	Biological Process: response to auxin (GO:0009733);;	K14488|1.8e-47|pavi:110745503|K14488 SAUR family protein | (RefSeq) indole-3-acetic acid-induced protein ARG7-like	Plant hormone signal transduction (ko04075)	--	--	Auxin responsive protein	Indole-3-acetic acid-induced protein ARG7 OS=Vigna radiata var. radiata OX=3916 GN=ARG7 PE=2 SV=1	--	--	indole-3-acetic acid-induced protein ARG7 [Prunus persica]
PaF106G0800029993.01	88	57	87	192	222	241	0.430078	0.329963	0.437378	1.02386	1.26915	1.18136	3.1931e-11	1.44968	up	[V]	Defense mechanisms	Molecular Function: ATP binding (GO:0005524);; Cellular Component: plasma membrane (GO:0005886);; Cellular Component: integral component of membrane (GO:0016021);; Molecular Function: ATPase activity (GO:0016887);; Molecular Function: ATPase activity, coupled to transmembrane movement of substances (GO:0042626);; Biological Process: transmembrane transport (GO:0055085);;	K08712|1.1e-134|gsl:Gasu_29800|K08712 ATP-binding cassette, subfamily G (WHITE), member 2, SNQ2 | (RefSeq) ABC transporter, ATP-binding protein	ABC transporters (ko02010)	[Q]	Secondary metabolites biosynthesis, transport and catabolism	ABC-2 type transporter	Pleiotropic drug resistance protein 1 OS=Nicotiana tabacum OX=4097 GN=PDR1 PE=2 SV=1	Q	Secondary metabolites biosynthesis, transport and catabolism	pleiotropic drug resistance protein 1-like [Prunus avium]
PaF106G0400015976.01	467	252	310	960	806	934	5.41	3.49855	3.70443	12.1218	10.9149	10.8446	3.39128e-18	1.424	up	[G]	Carbohydrate transport and metabolism	Molecular Function: hydrolase activity, hydrolyzing O-glycosyl compounds (GO:0004553);; Biological Process: carbohydrate metabolic process (GO:0005975);;	K05350|9.4e-295|pmum:103326243|K05350 beta-glucosidase [EC:3.2.1.21] | (RefSeq) beta-glucosidase 18-like	Cyanoamino acid metabolism (ko00460);; Starch and sucrose metabolism (ko00500);; Phenylpropanoid biosynthesis (ko00940)	[G]	Carbohydrate transport and metabolism	Glycosyl hydrolase family 1	Beta-glucosidase 18 OS=Oryza sativa subsp. japonica OX=39947 GN=BGLU18 PE=3 SV=2	G	Carbohydrate transport and metabolism	PREDICTED: beta-glucosidase 18-like [Prunus mume]
PaF106G0800031073.01	98	77	68	112	340	265	1.40252	1.3235	1.00198	1.74764	5.69459	3.83177	8.17849e-06	1.35141	up	[QV]	Secondary metabolites biosynthesis, transport and catabolism;; Defense mechanisms	Molecular Function: monooxygenase activity (GO:0004497);; Molecular Function: iron ion binding (GO:0005506);; Cellular Component: integral component of membrane (GO:0016021);; Molecular Function: oxidoreductase activity, acting on paired donors, with incorporation or reduction of molecular oxygen (GO:0016705);; Molecular Function: heme binding (GO:0020037);;	K09843|2.4e-176|pmum:103335270|K09843 (+)-abscisic acid 8'-hydroxylase [EC:1.14.14.137] | (RefSeq) abscisic acid 8'-hydroxylase 4	Carotenoid biosynthesis (ko00906)	[QI]	Secondary metabolites biosynthesis, transport and catabolism;; Lipid transport and metabolism	Cytochrome P450	Abscisic acid 8'-hydroxylase 4 OS=Arabidopsis thaliana OX=3702 GN=CYP707A4 PE=2 SV=2	Q	Secondary metabolites biosynthesis, transport and catabolism	unnamed protein product [Prunus armeniaca]
PaF106G0100000450.01	767	684	666	218	224	318	9.91683	10.6013	8.83501	3.04229	3.35575	4.14461	5.50442e-21	-1.34817	down	[Q]	Secondary metabolites biosynthesis, transport and catabolism	Molecular Function: metal ion binding (GO:0046872);; Molecular Function: dioxygenase activity (GO:0051213);;	K13229|5.2e-82|ats:109766943|K13229 2,4-dihydroxy-1,4-benzoxazin-3-one-glucoside dioxygenase [EC:1.14.11.59] | (RefSeq) LOC109766943; DIBOA-glucoside dioxygenase BX6-like	Benzoxazinoid biosynthesis (ko00402)	[QR]	Secondary metabolites biosynthesis, transport and catabolism;; General function prediction only	2OG-Fe(II) oxygenase superfamily	1-aminocyclopropane-1-carboxylate oxidase homolog 1 OS=Arabidopsis thaliana OX=3702 GN=At1g06620 PE=2 SV=1	Q	Secondary metabolites biosynthesis, transport and catabolism	unnamed protein product [Prunus armeniaca]
PaF106G0100002809.01	70	65	60	164	126	210	1.668	1.86335	1.4782	4.31108	3.54113	5.07003	1.38952e-07	1.27232	up	[QV]	Secondary metabolites biosynthesis, transport and catabolism;; Defense mechanisms	Molecular Function: iron ion binding (GO:0005506);; Cellular Component: membrane (GO:0016020);; Molecular Function: oxidoreductase activity, acting on paired donors, with incorporation or reduction of molecular oxygen, NAD(P)H as one donor, and incorporation of one atom of oxygen (GO:0016709);; Molecular Function: heme binding (GO:0020037);;	K23810|1.3e-109|vvi:100855232|K23810 (E)-8-carboxylinalool synthase [EC:1.14.14.-] | (RefSeq) geraniol 8-hydroxylase	Monoterpenoid biosynthesis (ko00902)	[Q]	Secondary metabolites biosynthesis, transport and catabolism	Cytochrome P450	Geraniol 8-hydroxylase OS=Catharanthus roseus OX=4058 GN=CYP76B6 PE=1 SV=1	Q	Secondary metabolites biosynthesis, transport and catabolism	geraniol 8-hydroxylase [Prunus persica]
PaF106G0100006468.01	106	63	97	11	8	17	1.33396	0.946706	1.25966	0.150542	0.11569	0.213837	2.2348e-10	-2.08236	down	--	--	Molecular Function: DNA binding (GO:0003677);; Molecular Function: metal ion binding (GO:0046872);;	K01062|3.2e-56|smo:SELMODRAFT_441340|K01062 platelet-activating factor acetylhydrolase [EC:3.1.1.47] | (RefSeq) hypothetical protein	Ether lipid metabolism (ko00565)	[K]	Transcription	Plus-3 domain	Uncharacterized protein At5g08430 OS=Arabidopsis thaliana OX=3702 GN=At5g08430 PE=1 SV=2	K	Transcription	PREDICTED: uncharacterized protein At5g08430 [Prunus mume]
PaF106G0800032313.01	229	224	243	62	73	82	1.22324	1.46107	1.35	0.356157	0.451235	0.433315	5.66846e-12	-1.46238	down	[R]	General function prediction only	Biological Process: signal transduction (GO:0007165);; Molecular Function: ADP binding (GO:0043531);;	K00695|7.8e-127|mtr:MTR_6g478030|K00695 sucrose synthase [EC:2.4.1.13] | (RefSeq) sucrose synthase	Starch and sucrose metabolism (ko00500)	--	--	TIR domain	Disease resistance protein Roq1 OS=Nicotiana benthamiana OX=4100 GN=ROQ1 PE=1 SV=1	S	Function unknown	PREDICTED: TMV resistance protein N-like [Prunus mume]
PaF106G0800030239.01	57	36	55	197	174	161	3.10845	2.34252	3.15756	12.2566	11.4139	9.20749	6.27028e-12	1.71282	up	[C]	Energy production and conversion	Molecular Function: FMN binding (GO:0010181);; Molecular Function: oxidoreductase activity (GO:0016491);;	K05894|5.5e-34|pmum:103319317|K05894 12-oxophytodienoic acid reductase [EC:1.3.1.42] | (RefSeq) 12-oxophytodienoate reductase 2-like	alpha-Linolenic acid metabolism (ko00592)	[CR]	Energy production and conversion;; General function prediction only	NADH:flavin oxidoreductase / NADH oxidase family	12-oxophytodienoate reductase 2 OS=Arabidopsis thaliana OX=3702 GN=OPR2 PE=1 SV=2	C	Energy production and conversion	unnamed protein product [Prunus armeniaca]
PaF106G0700027134.01	96	66	95	335	342	371	2.73556	2.23544	2.8079	10.4713	11.4594	10.6474	5.23621e-27	1.98395	up	--	--	Biological Process: response to auxin (GO:0009733);;	K14488|9.6e-58|pper:18769935|K14488 SAUR family protein | (RefSeq) auxin-responsive protein SAUR50	Plant hormone signal transduction (ko04075)	--	--	Auxin responsive protein	Auxin-responsive protein SAUR50 OS=Arabidopsis thaliana OX=3702 GN=SAUR50 PE=1 SV=1	S	Function unknown	auxin-responsive protein SAUR50 [Prunus persica]
PaF106G0500018861.01	945	500	866	129	88	79	12.8343	8.11742	12.1283	1.89339	1.38039	1.06438	7.62468e-33	-2.57539	down	--	--	Molecular Function: transmembrane receptor protein serine/threonine kinase activity (GO:0004675);; Molecular Function: ATP binding (GO:0005524);; Cellular Component: plasma membrane (GO:0005886);; Biological Process: protein phosphorylation (GO:0006468);; Cellular Component: integral component of membrane (GO:0016021);;	K13430|1.4e-37|ghi:107911736|K13430 serine/threonine-protein kinase PBS1 [EC:2.7.11.1] | (RefSeq) serine/threonine-protein kinase CDL1-like	Plant-pathogen interaction (ko04626)	[T]	Signal transduction mechanisms	Protein tyrosine and serine/threonine kinase	Receptor-like cytoplasmic kinase 185 OS=Oryza sativa subsp. japonica OX=39947 GN=RLCK185 PE=1 SV=1	T	Signal transduction mechanisms	PREDICTED: serine/threonine-protein kinase CDL1-like [Prunus mume]
PaF106G0100000451.01	884	744	802	354	334	432	12.3376	12.4239	11.545	5.37714	5.43046	6.03109	1.56174e-17	-1.00716	down	[Q]	Secondary metabolites biosynthesis, transport and catabolism	Molecular Function: metal ion binding (GO:0046872);; Molecular Function: dioxygenase activity (GO:0051213);;	K13229|5.2e-82|ats:109766943|K13229 2,4-dihydroxy-1,4-benzoxazin-3-one-glucoside dioxygenase [EC:1.14.11.59] | (RefSeq) LOC109766943; DIBOA-glucoside dioxygenase BX6-like	Benzoxazinoid biosynthesis (ko00402)	[QR]	Secondary metabolites biosynthesis, transport and catabolism;; General function prediction only	2OG-Fe(II) oxygenase superfamily	1-aminocyclopropane-1-carboxylate oxidase homolog 1 OS=Arabidopsis thaliana OX=3702 GN=At1g06620 PE=2 SV=1	Q	Secondary metabolites biosynthesis, transport and catabolism	PREDICTED: 1-aminocyclopropane-1-carboxylate oxidase homolog 1-like [Prunus mume]
PaF106G0200008699.01	398	240	231	119	108	136	6.75216	4.86516	4.04602	2.18997	2.12757	2.30256	1.41147e-06	-1.05905	down	[M]	Cell wall/membrane/envelope biogenesis	Molecular Function: oxidoreductase activity (GO:0016491);; Molecular Function: oxidoreductase activity, acting on the CH-OH group of donors, NAD or NADP as acceptor (GO:0016616);;	K13265|7.4e-117|gmx:100793687|K13265 vestitone reductase [EC:1.1.1.348] | (RefSeq) uncharacterized protein LOC100793687	Isoflavonoid biosynthesis (ko00943)	[V]	Defense mechanisms	NAD dependent epimerase/dehydratase family	Vestitone reductase OS=Medicago sativa OX=3879 PE=1 SV=1	V	Defense mechanisms	unnamed protein product [Prunus armeniaca]
Prunus_sibirica_newGene_1385	122	48	52	13	18	4	1.871	0.78965	0.822198	0.260043	0.260352	0.047299	4.69004e-05	-1.54191	down	--	--	Molecular Function: nucleic acid binding (GO:0003676);; Molecular Function: zinc ion binding (GO:0008270);; Biological Process: DNA integration (GO:0015074);;	K14503|3.8e-26|mdm:114821340|K14503 brassinosteroid resistant 1/2 | (RefSeq) BES1/BZR1 homolog protein 2-like	Plant hormone signal transduction (ko04075)	--	--	gag-polypeptide of LTR copia-type	--	L	Replication, recombination and repair	hypothetical protein Prudu_019255 [Prunus dulcis]
PaF106G0500020680.01	1386	388	499	104	140	106	19.3628	6.60293	7.21206	1.64557	2.29272	1.58899	1.96892e-05	-1.60477	down	[G]	Carbohydrate transport and metabolism	Molecular Function: pectate lyase activity (GO:0030570);; Biological Process: pectin catabolic process (GO:0045490);; Molecular Function: metal ion binding (GO:0046872);;	K01728|2.5e-211|pmum:103338413|K01728 pectate lyase [EC:4.2.2.2] | (RefSeq) pectate lyase-like	Pentose and glucuronate interconversions (ko00040)	--	--	Pectate lyase	Pectate lyase OS=Lilium longiflorum OX=4690 PE=2 SV=1	G	Carbohydrate transport and metabolism	PREDICTED: pectate lyase-like [Prunus mume]
PaF106G0400015974.01	255	227	249	729	602	631	2.40415	2.55672	2.41718	7.48187	6.62683	5.9538	5.0083e-22	1.45399	up	[T]	Signal transduction mechanisms	Molecular Function: ATP binding (GO:0005524);; Cellular Component: plasma membrane (GO:0005886);; Cellular Component: integral component of membrane (GO:0016021);; Molecular Function: ATPase activity (GO:0016887);; Molecular Function: ATPase activity, coupled to transmembrane movement of substances (GO:0042626);; Biological Process: transmembrane transport (GO:0055085);;	K05681|2.0e-232|nau:109228191|K05681 ATP-binding cassette, subfamily G (WHITE), member 2 | (RefSeq) ABC transporter G family member 9-like	ABC transporters (ko02010)	[Q]	Secondary metabolites biosynthesis, transport and catabolism	ABC-2 type transporter	ABC transporter G family member 9 OS=Arabidopsis thaliana OX=3702 GN=ABCG9 PE=1 SV=2	Q	Secondary metabolites biosynthesis, transport and catabolism	unnamed protein product [Prunus armeniaca]
PaF106G0100001107.01	2147	1728	1984	3822	3426	4096	28.5762	27.4667	27.2385	55.4508	53.2391	54.6357	4.89488e-41	1.03197	up	--	--	Cellular Component: nucleus (GO:0005634);; Molecular Function: zinc ion binding (GO:0008270);; Biological Process: regulation of flower development (GO:0009909);;	K12135|7.3e-11|thj:104802991|K12135 zinc finger protein CONSTANS | (RefSeq) zinc finger protein CONSTANS-LIKE 2-like	Circadian rhythm - plant (ko04712)	[K]	Transcription	B-box zinc finger	Zinc finger protein CONSTANS-LIKE 5 OS=Arabidopsis thaliana OX=3702 GN=COL5 PE=2 SV=2	K	Transcription	zinc finger protein CONSTANS-LIKE 5 [Prunus persica]
PaF106G0300013592.01	95	112	65	320	358	438	1.47886	2.07826	1.03642	5.4188	6.51287	6.83819	8.42129e-19	1.91314	up	[M]	Cell wall/membrane/envelope biogenesis	Molecular Function: protein serine/threonine kinase activity (GO:0004674);; Molecular Function: ATP binding (GO:0005524);; Cellular Component: integral component of membrane (GO:0016021);;	K13416|2.5e-51|lsv:111899011|K13416 brassinosteroid insensitive 1-associated receptor kinase 1 [EC:2.7.10.1 2.7.11.1] | (RefSeq) BRASSINOSTEROID INSENSITIVE 1-associated receptor kinase 1-like isoform X1	MAPK signaling pathway - plant (ko04016);; Plant hormone signal transduction (ko04075);; Plant-pathogen interaction (ko04626)	[T]	Signal transduction mechanisms	Protein kinase domain	LEAF RUST 10 DISEASE-RESISTANCE LOCUS RECEPTOR-LIKE PROTEIN KINASE-like 2.2 OS=Arabidopsis thaliana OX=3702 GN=LRK10L-2.2 PE=3 SV=2	T	Signal transduction mechanisms	LEAF RUST 10 DISEASE-RESISTANCE LOCUS RECEPTOR-LIKE PROTEIN KINASE-like 2.2 [Prunus dulcis]
PaF106G0500020082.01	476	374	320	654	778	945	4.44919	4.20601	3.16267	6.7298	8.52795	8.86923	1.68366e-11	1.05804	up	[O]	Posttranslational modification, protein turnover, chaperones	Molecular Function: serine-type endopeptidase activity (GO:0004252);; Cellular Component: extracellular space (GO:0005615);;	K12663|4.0e-07|aip:107640222|K12663 Delta3,5-Delta2,4-dienoyl-CoA isomerase [EC:5.3.3.21] | (RefSeq) delta(3,5)-Delta(2,4)-dienoyl-CoA isomerase, peroxisomal-like	Peroxisome (ko04146)	--	--	Peptidase inhibitor I9	Subtilisin-like protease SBT3.5 OS=Arabidopsis thaliana OX=3702 GN=SBT3.5 PE=1 SV=1	O	Posttranslational modification, protein turnover, chaperones	PREDICTED: subtilisin-like protease SBT3.10 [Prunus mume]
PaF106G0800032368.01	34	31	28	91	89	116	0.213421	0.235438	0.18288	0.630933	0.655738	0.739583	2.47903e-07	1.46551	up	--	--	Biological Process: signal transduction (GO:0007165);; Cellular Component: integral component of membrane (GO:0016021);; Molecular Function: ADP binding (GO:0043531);;	K00695|2.4e-111|mtr:MTR_6g478030|K00695 sucrose synthase [EC:2.4.1.13] | (RefSeq) sucrose synthase	Starch and sucrose metabolism (ko00500)	--	--	TIR domain	Disease resistance protein Roq1 OS=Nicotiana benthamiana OX=4100 GN=ROQ1 PE=1 SV=1	S	Function unknown	TMV resistance protein N [Prunus persica]
PaF106G0600023075.01	803	986	951	57	214	125	20.4624	30.0701	24.9976	1.57841	6.35749	3.1773	1.62063e-05	-1.63785	down	[IQR]	Lipid transport and metabolism;; Secondary metabolites biosynthesis, transport and catabolism;; General function prediction only	Molecular Function: oxidoreductase activity (GO:0016491);;	K09841|4.3e-78|nto:104121195|K09841 xanthoxin dehydrogenase [EC:1.1.1.288] | (RefSeq) xanthoxin dehydrogenase-like	Carotenoid biosynthesis (ko00906)	[R]	General function prediction only	Enoyl-(Acyl carrier protein) reductase	Secoisolariciresinol dehydrogenase (Fragment) OS=Forsythia intermedia OX=55183 PE=1 SV=1	Q	Secondary metabolites biosynthesis, transport and catabolism	unnamed protein product [Prunus armeniaca]
PaF106G0500020930.01	1074	1181	1039	518	353	613	10.1564	13.3636	10.1272	5.32673	3.88727	5.79896	1.44142e-10	-1.03581	down	--	--	Molecular Function: DNA binding (GO:0003677);; Cellular Component: nucleus (GO:0005634);; Biological Process: DNA replication (GO:0006260);; Biological Process: DNA repair (GO:0006281);; Biological Process: DNA recombination (GO:0006310);; Molecular Function: metal ion binding (GO:0046872);;	K07466|0.0e+00|pmum:103338573|K07466 replication factor A1 | (RefSeq) replication protein A 70 kDa DNA-binding subunit B	DNA replication (ko03030);; Nucleotide excision repair (ko03420);; Mismatch repair (ko03430);; Homologous recombination (ko03440)	[L]	Replication, recombination and repair	Replication factor-A C terminal domain	Replication protein A 70 kDa DNA-binding subunit B OS=Arabidopsis thaliana OX=3702 GN=RPA1B PE=3 SV=1	L	Replication, recombination and repair	PREDICTED: replication protein A 70 kDa DNA-binding subunit B [Prunus mume]
PaF106G0100006472.01	406	399	434	899	956	1185	1.90653	2.27141	3.00487	4.64231	5.11372	5.54497	5.31485e-28	1.33601	up	--	--	Biological Process: signal transduction (GO:0007165);; Molecular Function: ADP binding (GO:0043531);;	K16225|1.9e-35|ath:AT5G45260|K16225 probable WRKY transcription factor 52 | (RefSeq) RRS1; Disease resistance protein (TIR-NBS-LRR class)	Plant-pathogen interaction (ko04626)	--	--	Leucine Rich repeats (2 copies)	TMV resistance protein N OS=Nicotiana glutinosa OX=35889 GN=N PE=1 SV=1	T	Signal transduction mechanisms	LOW QUALITY PROTEIN: disease resistance protein RPV1-like [Prunus dulcis]
PaF106G0600023103.01	271	265	336	16	33	41	2.65941	3.10806	3.40314	0.160726	0.37313	0.395451	2.05978e-28	-2.77033	down	--		Molecular Function: protein serine/threonine kinase activity (GO:0004674);; Molecular Function: ATP binding (GO:0005524);; Molecular Function: polysaccharide binding (GO:0030247);;	K13416|3.2e-48|bna:106376693|K13416 brassinosteroid insensitive 1-associated receptor kinase 1 [EC:2.7.10.1 2.7.11.1] | (RefSeq) BRASSINOSTEROID INSENSITIVE 1-associated receptor kinase 1-like isoform X1	MAPK signaling pathway - plant (ko04016);; Plant hormone signal transduction (ko04075);; Plant-pathogen interaction (ko04626)	--	--	Protein kinase domain	Rust resistance kinase Lr10 OS=Triticum aestivum OX=4565 GN=LRK10 PE=2 SV=1	T	Signal transduction mechanisms	PREDICTED: rust resistance kinase Lr10-like [Prunus mume]
PaF106G0800032700.01	333	319	296	108	155	155	4.8472	6.08443	4.79943	1.83119	2.73108	2.39485	3.95337e-07	-1.01723	down	[R]	General function prediction only	Molecular Function: alcohol dehydrogenase activity, zinc-dependent (GO:0004024);; Cellular Component: cytosol (GO:0005829);; Molecular Function: zinc ion binding (GO:0008270);; Biological Process: formaldehyde catabolic process (GO:0046294);; Molecular Function: S-(hydroxymethyl)glutathione dehydrogenase activity (GO:0051903);;	K18857|2.8e-69|pmum:103336428|K18857 alcohol dehydrogenase class-P [EC:1.1.1.1] | (RefSeq) alcohol dehydrogenase	Glycolysis / Gluconeogenesis (ko00010);; Fatty acid degradation (ko00071);; Tyrosine metabolism (ko00350);; alpha-Linolenic acid metabolism (ko00592)	[Q]	Secondary metabolites biosynthesis, transport and catabolism	Zinc-binding dehydrogenase	Alcohol dehydrogenase OS=Fragaria ananassa OX=3747 GN=ADH PE=3 SV=2	Q	Secondary metabolites biosynthesis, transport and catabolism	unnamed protein product [Prunus armeniaca]
PaF106G0800029853.01	31	11	16	77	74	62	1.18699	0.502909	0.627984	3.2473	3.355	2.38556	1.95777e-05	1.46912	up	[F]	Nucleotide transport and metabolism	Molecular Function: nucleoside diphosphate kinase activity (GO:0004550);; Biological Process: GTP biosynthetic process (GO:0006183);; Biological Process: UTP biosynthetic process (GO:0006228);; Biological Process: CTP biosynthetic process (GO:0006241);; Biological Process: cellular response to hydrogen peroxide (GO:0070301);;	K00940|9.1e-33|mdm:103439015|K00940 nucleoside-diphosphate kinase [EC:2.7.4.6] | (RefSeq) nucleoside diphosphate kinase 1	Purine metabolism (ko00230);; Pyrimidine metabolism (ko00240);; MAPK signaling pathway - plant (ko04016)	[F]	Nucleotide transport and metabolism	Nucleoside diphosphate kinase	Nucleoside diphosphate kinase 1 OS=Pisum sativum OX=3888 GN=NDPK1 PE=2 SV=1	F	Nucleotide transport and metabolism	unnamed protein product [Prunus armeniaca]
PaF106G0100003722.01	162	98	132	23	14	65	3.38985	2.45856	2.85202	0.520798	0.327111	1.35271	3.23799e-05	-1.41355	down	--	--	Cellular Component: nucleus (GO:0005634);; Biological Process: regulation of transcription, DNA-templated (GO:0006355);; Molecular Function: protein dimerization activity (GO:0046983);; Biological Process: positive regulation of brassinosteroid biosynthetic process (GO:2000488);;	K18878|1.2e-25|cann:107866053|K18878 BHLH transcription factor Upa20 | (RefSeq) Upa20; transcription factor bHLH137-like	Plant-pathogen interaction (ko04626)	--	--	Helix-loop-helix DNA-binding domain	Transcription factor bHLH75 OS=Arabidopsis thaliana OX=3702 GN=BHLH75 PE=2 SV=1	K	Transcription	unnamed protein product [Prunus armeniaca]
PaF106G0300011713.01	676	521	529	1396	1636	1956	10.1035	9.30907	8.15626	22.713	28.556	29.2846	6.99291e-40	1.5748	up	--	--	Cellular Component: nucleus (GO:0005634);; Molecular Function: zinc ion binding (GO:0008270);;	K12135|3.9e-85|thj:104802991|K12135 zinc finger protein CONSTANS | (RefSeq) zinc finger protein CONSTANS-LIKE 2-like	Circadian rhythm - plant (ko04712)	[K]	Transcription	CCT motif	Zinc finger protein CONSTANS-LIKE 2 OS=Arabidopsis thaliana OX=3702 GN=COL2 PE=1 SV=1	K	Transcription	PREDICTED: zinc finger protein CONSTANS-LIKE 2 [Prunus mume]
PaF106G0200010394.01	2109	1599	2161	555	535	649	28.6805	26.0331	30.3135	8.20475	8.4815	8.82917	1.51626e-53	-1.62867	down	[G]	Carbohydrate transport and metabolism	Molecular Function: alpha-L-fucosidase activity (GO:0004560);; Biological Process: carbohydrate metabolic process (GO:0005975);;	K01206|7.6e-299|pmum:103333294|K01206 alpha-L-fucosidase [EC:3.2.1.51] | (RefSeq) alpha-L-fucosidase 1-like	Other glycan degradation (ko00511)	[G]	Carbohydrate transport and metabolism	Alpha-L-fucosidase	Alpha-L-fucosidase 1 OS=Arabidopsis thaliana OX=3702 GN=FUC1 PE=1 SV=2	G	Carbohydrate transport and metabolism	unnamed protein product [Prunus armeniaca]
PaF106G0100000441.01	382	288	371	74	84	124	6.98994	6.30891	6.99732	1.45843	1.7891	2.25866	1.10286e-17	-1.6714	down	[Q]	Secondary metabolites biosynthesis, transport and catabolism	Molecular Function: oxidoreductase activity (GO:0016491);; Molecular Function: metal ion binding (GO:0046872);;	K13229|8.9e-82|sita:101778204|K13229 2,4-dihydroxy-1,4-benzoxazin-3-one-glucoside dioxygenase [EC:1.14.11.59] | (RefSeq) DIBOA-glucoside dioxygenase BX6	Benzoxazinoid biosynthesis (ko00402)	[QR]	Secondary metabolites biosynthesis, transport and catabolism;; General function prediction only	2OG-Fe(II) oxygenase superfamily	1-aminocyclopropane-1-carboxylate oxidase homolog 1 OS=Arabidopsis thaliana OX=3702 GN=At1g06620 PE=2 SV=1	Q	Secondary metabolites biosynthesis, transport and catabolism	unnamed protein product [Prunus armeniaca]
PaF106G0200007328.01	339	258	232	91	93	121	1.34467	1.18641	0.942957	0.399964	0.447353	0.443437	1.15204e-09	-1.25035	down	[R]	General function prediction only	Molecular Function: ADP binding (GO:0043531);;	K12818|1.3e-209|mtr:MTR_0267s0070|K12818 ATP-dependent RNA helicase DHX8/PRP22 [EC:3.6.4.13] | (RefSeq) NB-ARC domain disease resistance protein, putative	Spliceosome (ko03040)	[T]	Signal transduction mechanisms	NB-ARC domain	Putative disease resistance RPP13-like protein 1 OS=Arabidopsis thaliana OX=3702 GN=RPPL1 PE=3 SV=1	T	Signal transduction mechanisms	PREDICTED: putative disease resistance RPP13-like protein 1 [Prunus mume]
PaF106G0600025229.01	19	19	4	60	102	88	0.204417	0.339373	0.041221	0.973856	1.82536	1.25671	5.44034e-07	1.7976	up	[M]	Cell wall/membrane/envelope biogenesis	Biological Process: galactose metabolic process (GO:0006012);; Molecular Function: inositol 3-alpha-galactosyltransferase activity (GO:0047216);;	K18819|1.4e-182|pmum:103344415|K18819 inositol 3-alpha-galactosyltransferase [EC:2.4.1.123] | (RefSeq) galactinol synthase 2	Galactose metabolism (ko00052)	[G]	Carbohydrate transport and metabolism	Glycosyl transferase family 8	Galactinol synthase 2 OS=Solanum lycopersicum OX=4081 GN=GOLS2 PE=2 SV=1	G	Carbohydrate transport and metabolism	hypothetical protein PRUPE_6G309400 [Prunus persica]
PaF106G0300012173.01	1392	1107	1293	369	341	483	28.1349	26.7694	26.9424	8.11745	8.04487	9.75858	3.72737e-43	-1.54784	down	[F]	Nucleotide transport and metabolism	Molecular Function: thymidine kinase activity (GO:0004797);; Molecular Function: ATP binding (GO:0005524);; Biological Process: double-strand break repair (GO:0006302);; Biological Process: response to UV-C (GO:0010225);; Molecular Function: identical protein binding (GO:0042802);; Biological Process: thymidine metabolic process (GO:0046104);; Biological Process: DNA biosynthetic process (GO:0071…	K00857|1.7e-151|pmum:103329224|K00857 thymidine kinase [EC:2.7.1.21] | (RefSeq) thymidine kinase a	Pyrimidine metabolism (ko00240)	[F]	Nucleotide transport and metabolism	Thymidine kinase	Thymidine kinase OS=Oryza sativa subsp. japonica OX=39947 GN=TK PE=2 SV=2	F	Nucleotide transport and metabolism	PREDICTED: thymidine kinase a [Prunus mume]
PaF106G0200008474.01	91	89	96	25	27	40	0.640741	0.720096	0.696667	0.183952	0.218909	0.268328	2.99822e-05	-1.24452	down	[J]	Translation, ribosomal structure and biogenesis	Molecular Function: tRNA binding (GO:0000049);; Molecular Function: methionine-tRNA ligase activity (GO:0004825);; Molecular Function: ATP binding (GO:0005524);; Biological Process: methionyl-tRNA aminoacylation (GO:0006431);;	K01874|1.1e-311|pmum:103331646|K01874 methionyl-tRNA synthetase [EC:6.1.1.10] | (RefSeq) probable methionine--tRNA ligase	Selenocompound metabolism (ko00450);; Aminoacyl-tRNA biosynthesis (ko00970)	[J]	Translation, ribosomal structure and biogenesis	tRNA synthetases class I (M)	Probable methionine--tRNA ligase OS=Oryza sativa subsp. japonica OX=39947 GN=Os06g0508700 PE=2 SV=2	J	Translation, ribosomal structure and biogenesis	unnamed protein product [Prunus armeniaca]
[truncated: 157 more rows]
