# Supplementary material for: Mining for genes related to pistil abortion in Prunus sibirica L
Source: PeerJ. 2022 Nov 15;10:e14366. doi: 10.7717/peerj.14366 (PMC9673769; doi:10.7717/peerj.14366)
Supplement: Table S10 [file peerj-10-14366-s010.xlsx]

## Sheet: Sheet1
Table S10 Detailed information of DEGs in COG classification
#ID	NPt1_Count	NPt2_Count	NPt3_Count	APt1_Count	APt2_Count	APt3_Count	NPt1_FPKM	NPt2_FPKM	NPt3_FPKM	APt1_FPKM	APt2_FPKM	APt3_FPKM	FDR	log2FC	regulated	COG_class	COG_class_annotation	GO_annotation	KEGG_annotation	KEGG_pathway_annotation	KOG_class	KOG_class_annotation	Pfam_annotation	Swiss-Prot_annotation	eggNOG_class	eggNOG_class_annotation	NR_annotation
PaF106G0700027016.01	22	27	33	88	78	73	0.266215	0.397679	0.416824	1.19332	1.12959	0.902823	4.31963e-05	1.29521	up	[IQ]	Lipid transport and metabolism;; Secondary metabolites biosynthesis, transport and catabolism	Molecular Function: catalytic activity (GO:0003824);;	K23618|4.3e-138|mus:103972138|K23618 acyl-activating enzyme 11/12 [EC:6.2.1.2 6.2.1.-] | (RefSeq) butyrate--CoA ligase AAE11, peroxisomal-like	--	[I]	Lipid transport and metabolism	AMP-binding enzyme	Probable acyl-activating enzyme 1, peroxisomal OS=Arabidopsis thaliana OX=3702 GN=AAE1 PE=2 SV=1	I	Lipid transport and metabolism	probable acyl-activating enzyme 1, peroxisomal [Prunus dulcis]
PaF106G0800030081.01	5860	4418	4509	1196	1135	977	89.1933	80.4833	70.8888	19.1251	19.2991	14.36	5.56432e-55	-1.98937	down	[R]	General function prediction only	Molecular Function: alcohol dehydrogenase activity, zinc-dependent (GO:0004024);; Cellular Component: cytosol (GO:0005829);; Molecular Function: zinc ion binding (GO:0008270);; Biological Process: formaldehyde catabolic process (GO:0046294);; Molecular Function: S-(hydroxymethyl)glutathione dehydrogenase activity (GO:0051903);;	K18857|1.2e-137|pper:18766308|K18857 alcohol dehydrogenase class-P [EC:1.1.1.1] | (RefSeq) alcohol dehydrogenase	Glycolysis / Gluconeogenesis (ko00010);; Fatty acid degradation (ko00071);; Tyrosine metabolism (ko00350);; alpha-Linolenic acid metabolism (ko00592)	[Q]	Secondary metabolites biosynthesis, transport and catabolism	Alcohol dehydrogenase GroES-like domain	Alcohol dehydrogenase OS=Malus domestica OX=3750 GN=ADH PE=2 SV=1	Q	Secondary metabolites biosynthesis, transport and catabolism	unnamed protein product [Prunus armeniaca]
PaF106G0600023237.01	217	254	281	513	601	709	1.67718	2.34926	2.24234	4.31567	5.4237	5.4951	1.78125e-14	1.2822	up	[T]	Signal transduction mechanisms	Biological Process: defense response (GO:0006952);; Molecular Function: ADP binding (GO:0043531);;	K13457|2.5e-114|qsu:111992130|K13457 disease resistance protein RPM1 | (RefSeq) disease resistance protein RPM1-like	Plant-pathogen interaction (ko04626)	[T]	Signal transduction mechanisms	NB-ARC domain	Putative disease resistance protein At1g50180 OS=Arabidopsis thaliana OX=3702 GN=At1g50180 PE=3 SV=2	T	Signal transduction mechanisms	PREDICTED: probable disease resistance RPP8-like protein 2 [Prunus mume]
PaF106G0300012796.01	14	12	7	74	56	50	0.196462	0.212962	0.106678	1.20853	0.977823	0.736642	7.09527e-07	1.75758	up	[E]	Amino acid transport and metabolism	Molecular Function: protein kinase activity (GO:0004672);; Molecular Function: protein serine/threonine kinase activity (GO:0004674);; Molecular Function: ATP binding (GO:0005524);;	K06272|7.4e-172|pper:18782708|K06272 integrin-linked kinase [EC:2.7.11.1] | (RefSeq) serine/threonine-protein kinase STY8	--	[T]	Signal transduction mechanisms	Protein tyrosine and serine/threonine kinase	Integrin-linked protein kinase 1 OS=Arabidopsis thaliana OX=3702 GN=ILK1 PE=1 SV=1	T	Signal transduction mechanisms	serine/threonine-protein kinase STY8 [Prunus persica]
PaF106G0200010874.01	8	12	20	57	87	115	0.108567	0.192998	0.280493	0.863532	1.49518	1.62176	6.59901e-09	1.97976	up	[R]	General function prediction only	Biological Process: oxidation-reduction process (GO:0055114);;	K00121|3.4e-201|pavi:110758566|K00121 S-(hydroxymethyl)glutathione dehydrogenase / alcohol dehydrogenase [EC:1.1.1.284 1.1.1.1] | (RefSeq) alcohol dehydrogenase-like 1	Glycolysis / Gluconeogenesis (ko00010);; Fatty acid degradation (ko00071);; Tyrosine metabolism (ko00350);; Carbon metabolism (ko01200)	[Q]	Secondary metabolites biosynthesis, transport and catabolism	Alcohol dehydrogenase GroES-like domain	CYP enzymes assisting alcohol dehydrogenase OS=Catharanthus roseus OX=4058 GN=CYPADH PE=1 SV=1	Q	Secondary metabolites biosynthesis, transport and catabolism	unnamed protein product [Prunus armeniaca]
PaF106G0400016209.01	452	551	649	233	205	245	5.39297	7.88414	8.15251	3.09882	2.92307	3.0266	8.22649e-10	-1.1248	down	[J]	Translation, ribosomal structure and biogenesis	Molecular Function: ATP binding (GO:0005524);; Cellular Component: mitochondrion (GO:0005739);; Biological Process: tRNA modification (GO:0006400);; Biological Process: cytokinin biosynthetic process (GO:0009691);; Molecular Function: tRNA dimethylallyltransferase activity (GO:0052381);;	K00791|1.7e-252|pper:18778576|K00791 tRNA dimethylallyltransferase [EC:2.5.1.75] | (RefSeq) tRNA dimethylallyltransferase 9 isoform X1	Zeatin biosynthesis (ko00908)	[J]	Translation, ribosomal structure and biogenesis	IPP transferase	tRNA dimethylallyltransferase 9 OS=Arabidopsis thaliana OX=3702 GN=IPT9 PE=2 SV=1	J	Translation, ribosomal structure and biogenesis	unnamed protein product [Prunus armeniaca]
PaF106G0300013919.01	179	184	200	626	466	614	0.765752	0.941558	0.881564	2.91875	2.33045	2.63258	4.09646e-23	1.59766	up	[V]	Defense mechanisms	Molecular Function: ATP binding (GO:0005524);; Cellular Component: integral component of membrane (GO:0016021);; Molecular Function: ATPase activity (GO:0016887);;	K08712|5.0e-144|gsl:Gasu_29800|K08712 ATP-binding cassette, subfamily G (WHITE), member 2, SNQ2 | (RefSeq) ABC transporter, ATP-binding protein	ABC transporters (ko02010)	[Q]	Secondary metabolites biosynthesis, transport and catabolism	ABC-2 type transporter	ABC transporter G family member 36 OS=Arabidopsis thaliana OX=3702 GN=ABCG36 PE=1 SV=1	Q	Secondary metabolites biosynthesis, transport and catabolism	unnamed protein product [Prunus armeniaca]
Prunus_sibirica_newGene_1590	330	312	306	2	0	0	3.04192	3.44267	2.91084	0.013919	0	0	3.80475e-67	-5.30061	down	[X]	Mobilome: prophages, transposons	Molecular Function: nucleic acid binding (GO:0003676);; Biological Process: DNA integration (GO:0015074);;	K11593|6.2e-64|dct:110097550|K11593 eukaryotic translation initiation factor 2C | (RefSeq) protein argonaute 1A-like	--	[R]	General function prediction only	GAG-pre-integrase domain	Retrovirus-related Pol polyprotein from transposon RE2 OS=Arabidopsis thaliana OX=3702 GN=RE2 PE=4 SV=1	L	Replication, recombination and repair	RmlC-like cupins superfamily protein [Prunus dulcis]
PaF106G0200007289.01	1455	1279	1326	189	182	234	5.39347	5.66923	5.05029	0.869916	0.81294	0.94767	2.36283e-111	-2.59478	down	[R]	General function prediction only	Molecular Function: ADP binding (GO:0043531);;	K12818|4.3e-197|mtr:MTR_0267s0070|K12818 ATP-dependent RNA helicase DHX8/PRP22 [EC:3.6.4.13] | (RefSeq) NB-ARC domain disease resistance protein, putative	Spliceosome (ko03040)	[T]	Signal transduction mechanisms	NB-ARC domain	Putative disease resistance RPP13-like protein 1 OS=Arabidopsis thaliana OX=3702 GN=RPPL1 PE=3 SV=1	T	Signal transduction mechanisms	PREDICTED: LOW QUALITY PROTEIN: putative disease resistance RPP13-like protein 1 [Prunus mume]
PaF106G0800030406.01	1361	1497	1539	3272	3015	3741	5.50488	7.78028	6.81683	17.4766	17.7351	18.4319	9.13376e-32	1.23928	up	[R]	General function prediction only	Biological Process: signal transduction (GO:0007165);; Molecular Function: ADP binding (GO:0043531);;	K00695|1.1e-98|mtr:MTR_6g478030|K00695 sucrose synthase [EC:2.4.1.13] | (RefSeq) sucrose synthase	Starch and sucrose metabolism (ko00500)	--	--	NB-ARC domain	Disease resistance protein Roq1 OS=Nicotiana benthamiana OX=4100 GN=ROQ1 PE=1 SV=1	T	Signal transduction mechanisms	PREDICTED: uncharacterized protein LOC103334707 [Prunus mume]
PaF106G0100000431.01	371	499	432	138	88	186	2.51932	4.05273	3.01968	1.01407	0.695249	1.26062	1.04003e-10	-1.45524	down	[KL]	Transcription;; Replication, recombination and repair	Molecular Function: nucleic acid binding (GO:0003676);; Molecular Function: ATP binding (GO:0005524);; Molecular Function: zinc ion binding (GO:0008270);; Molecular Function: hydrolase activity, acting on acid anhydrides, in phosphorus-containing anhydrides (GO:0016818);;	K15505|0.0e+00|pmum:103324215|K15505 DNA repair protein RAD5 [EC:3.6.4.-] | (RefSeq) putative SWI/SNF-related matrix-associated actin-dependent regulator of chromatin subfamily A member 3-like 3	--	[KL]	Transcription;; Replication, recombination and repair	SNF2 family N-terminal domain	DNA repair protein RAD5B OS=Arabidopsis thaliana OX=3702 GN=RAD5B PE=3 SV=1	--	--	unnamed protein product [Prunus armeniaca]
PaF106G0400017987.01	72	80	74	429	304	524	0.584305	0.773602	0.617077	3.81083	2.89561	4.28041	3.1563e-31	2.33716	up	[M]	Cell wall/membrane/envelope biogenesis	Molecular Function: protein serine/threonine kinase activity (GO:0004674);; Molecular Function: ATP binding (GO:0005524);; Cellular Component: integral component of membrane (GO:0016021);; Biological Process: recognition of pollen (GO:0048544);;	K24104|9.3e-82|thj:104799061|K24104 GPN-loop GTPase | (RefSeq) LOW QUALITY PROTEIN: uncharacterized protein LOC104799061	--	--	--	Protein tyrosine and serine/threonine kinase	G-type lectin S-receptor-like serine/threonine-protein kinase At1g11410 OS=Arabidopsis thaliana OX=3702 GN=At1g11410 PE=3 SV=3	T	Signal transduction mechanisms	unnamed protein product [Prunus armeniaca]
PaF106G0600023222.01	75	96	108	192	234	338	1.52389	2.38523	2.31318	4.31538	5.6663	7.03684	1.15242e-08	1.35287	up	[IQR]	Lipid transport and metabolism;; Secondary metabolites biosynthesis, transport and catabolism;; General function prediction only	--	K15095|2.5e-168|pmum:103330196|K15095 (+)-neomenthol dehydrogenase [EC:1.1.1.208] | (RefSeq) (+)-neomenthol dehydrogenase-like isoform X2	Monoterpenoid biosynthesis (ko00902)	[Q]	Secondary metabolites biosynthesis, transport and catabolism	short chain dehydrogenase	(+)-neomenthol dehydrogenase OS=Arabidopsis thaliana OX=3702 GN=SDR1 PE=1 SV=1	Q	Secondary metabolites biosynthesis, transport and catabolism	PREDICTED: (+)-neomenthol dehydrogenase-like isoform X1 [Prunus mume]
PaF106G0200010724.01	249	189	333	472	577	623	6.52032	5.93042	8.98466	13.4609	17.6409	16.3559	1.23744e-09	1.13373	up	[CI]	Energy production and conversion;; Lipid transport and metabolism	Cellular Component: vacuolar membrane (GO:0005774);; Cellular Component: endoplasmic reticulum (GO:0005783);; Cellular Component: plasma membrane (GO:0005886);; Molecular Function: electron carrier activity (GO:0009055);; Cellular Component: chloroplast thylakoid membrane (GO:0009535);; Cellular Component: membrane (GO:0016020);; Cellular Component: integral component of membrane (GO:0016021);; M…	K23490|8.3e-51|pmum:103333591|K23490 cytochrome b5 | (RefSeq) cytochrome b5	--	[C]	Energy production and conversion	Cytochrome b5-like Heme/Steroid binding domain	Cytochrome b5 OS=Brassica oleracea var. botrytis OX=3715 GN=CYB5 PE=1 SV=1	C	Energy production and conversion	PREDICTED: cytochrome b5 [Prunus mume]
PaF106G0200008335.01	208	194	235	77	107	90	2.85306	3.1948	3.32873	1.14365	1.71737	1.23501	9.84812e-06	-1.01507	down	[QV]	Secondary metabolites biosynthesis, transport and catabolism;; Defense mechanisms	Molecular Function: monooxygenase activity (GO:0004497);; Molecular Function: iron ion binding (GO:0005506);; Cellular Component: integral component of membrane (GO:0016021);; Molecular Function: oxidoreductase activity, acting on paired donors, with incorporation or reduction of molecular oxygen (GO:0016705);; Molecular Function: heme binding (GO:0020037);;	K20661|1.9e-70|nnu:104612956|K20661 cytochrome P450 family 714 subfamily A polypeptide 1 | (RefSeq) cytochrome P450 714A1-like	--	[QI]	Secondary metabolites biosynthesis, transport and catabolism;; Lipid transport and metabolism	Cytochrome P450	Cytochrome P450 714C2 OS=Oryza sativa subsp. japonica OX=39947 GN=CYP714C2 PE=2 SV=1	Q	Secondary metabolites biosynthesis, transport and catabolism	unnamed protein product [Prunus armeniaca]
PaF106G0800030917.01	239	131	158	354	362	418	3.23797	2.12797	2.20251	5.23316	5.73523	5.67868	3.11998e-09	1.12604	up	[M]	Cell wall/membrane/envelope biogenesis	Molecular Function: catalytic activity (GO:0003824);; Cellular Component: integral component of membrane (GO:0016021);;	K22419|6.6e-229|pper:18768093|K22419 Delta4-3-oxosteroid 5beta-reductase [EC:1.3.1.3] | (RefSeq) 3-oxo-Delta(4,5)-steroid 5-beta-reductase	--	--	--	--	(S)-8-oxocitronellyl enol synthase CYC2 OS=Camptotheca acuminata OX=16922 GN=CYC2 PE=1 SV=1	S	Function unknown	unnamed protein product [Prunus armeniaca]
PaF106G0100004891.01	618	471	573	1082	1126	1448	8.75966	7.75415	8.68185	16.6524	18.6659	20.3311	5.11327e-27	1.19536	up	[EH]	Amino acid transport and metabolism;; Coenzyme transport and metabolism	Biological Process: branched-chain amino acid biosynthetic process (GO:0009082);; Molecular Function: L-leucine transaminase activity (GO:0052654);; Molecular Function: L-valine transaminase activity (GO:0052655);; Molecular Function: L-isoleucine transaminase activity (GO:0052656);;	K00826|2.5e-98|pmum:103320512|K00826 branched-chain amino acid aminotransferase [EC:2.6.1.42] | (RefSeq) branched-chain-amino-acid aminotransferase 2, chloroplastic-like isoform X1	Cysteine and methionine metabolism (ko00270);; Valine, leucine and isoleucine degradation (ko00280);; Valine, leucine and isoleucine biosynthesis (ko00290);; Pantothenate and CoA biosynthesis (ko00770);; Glucosinolate biosynthesis (ko00966);; 2-Oxocarboxylic acid metabolism (ko01210);; Biosynthesis of amino acids (ko01230)	[E]	Amino acid transport and metabolism	--	Branched-chain-amino-acid aminotransferase 2, chloroplastic OS=Arabidopsis thaliana OX=3702 GN=BCAT2 PE=1 SV=1	E	Amino acid transport and metabolism	unnamed protein product [Prunus armeniaca]
PaF106G0600021550.01	693	634	671	29	27	31	8.37294	9.1498	8.42888	0.372451	0.370259	0.362104	3.24157e-105	-4.10218	down	[EF]	Amino acid transport and metabolism;; Nucleotide transport and metabolism	Molecular Function: carbamoyl-phosphate synthase (glutamine-hydrolyzing) activity (GO:0004088);; Cellular Component: cytoplasm (GO:0005737);; Cellular Component: carbamoyl-phosphate synthase complex (GO:0005951);; Biological Process: 'de novo' pyrimidine nucleobase biosynthetic process (GO:0006207);; Biological Process: arginine biosynthetic process (GO:0006526);; Biological Process: glutamine me…	K01956|8.1e-249|pmum:103341837|K01956 carbamoyl-phosphate synthase small subunit [EC:6.3.5.5] | (RefSeq) carbamoyl-phosphate synthase small chain, chloroplastic-like	Pyrimidine metabolism (ko00240);; Alanine, aspartate and glutamate metabolism (ko00250)	[R]	General function prediction only	Carbamoyl-phosphate synthase small chain, CPSase domain	Carbamoyl-phosphate synthase small chain, chloroplastic OS=Arabidopsis thaliana OX=3702 GN=CARA PE=1 SV=1	--	--	PREDICTED: carbamoyl-phosphate synthase small chain, chloroplastic-like [Prunus mume]
PaF106G0800032004.01	1230	930	1057	3244	2840	3310	8.40559	7.60005	7.45059	24.1304	22.6564	22.6467	6.02743e-71	1.61458	up	[P]	Inorganic ion transport and metabolism	Molecular Function: potassium ion transmembrane transporter activity (GO:0015079);; Cellular Component: integral component of membrane (GO:0016021);;	K03549|3.2e-273|tcc:18609410|K03549 KUP system potassium uptake protein | (RefSeq) putative potassium transporter 12	--	--	--	K+ potassium transporter	Potassium transporter 7 OS=Arabidopsis thaliana OX=3702 GN=POT7 PE=1 SV=2	P	Inorganic ion transport and metabolism	PREDICTED: potassium transporter 7 [Prunus mume]
PaF106G0500018894.01	3	0	0	206	173	227	0.032455	0	0	3.60647	3.25742	3.66482	6.86474e-51	4.74799	up	[J]	Translation, ribosomal structure and biogenesis	Molecular Function: tyrosine-tRNA ligase activity (GO:0004831);; Molecular Function: ATP binding (GO:0005524);; Biological Process: tRNA aminoacylation for protein translation (GO:0006418);;	K01866|4.6e-211|pavi:110768363|K01866 tyrosyl-tRNA synthetase [EC:6.1.1.1] | (RefSeq) tyrosine--tRNA ligase 1, cytoplasmic-like	Aminoacyl-tRNA biosynthesis (ko00970)	[J]	Translation, ribosomal structure and biogenesis	tRNA synthetases class I (W and Y)	Tyrosine--tRNA ligase 1, cytoplasmic OS=Arabidopsis thaliana OX=3702 GN=At2g33840 PE=2 SV=1	J	Translation, ribosomal structure and biogenesis	unnamed protein product [Prunus armeniaca]
PaF106G0800029849.01	23	49	48	106	112	94	0.447345	1.15972	0.975355	2.31826	2.62491	1.8781	0.000372758	1.1481	up	[Q]	Secondary metabolites biosynthesis, transport and catabolism	Molecular Function: metal ion binding (GO:0046872);; Molecular Function: dioxygenase activity (GO:0051213);;	K13229|4.3e-75|ats:109766943|K13229 2,4-dihydroxy-1,4-benzoxazin-3-one-glucoside dioxygenase [EC:1.14.11.59] | (RefSeq) LOC109766943; DIBOA-glucoside dioxygenase BX6-like	Benzoxazinoid biosynthesis (ko00402)	[QR]	Secondary metabolites biosynthesis, transport and catabolism;; General function prediction only	2OG-Fe(II) oxygenase superfamily	1-aminocyclopropane-1-carboxylate oxidase homolog 1 OS=Arabidopsis thaliana OX=3702 GN=At1g06620 PE=2 SV=1	Q	Secondary metabolites biosynthesis, transport and catabolism	PREDICTED: 1-aminocyclopropane-1-carboxylate oxidase homolog 1-like [Prunus mume]
PaF106G0400016408.01	330	346	345	69	101	131	5.07492	6.54801	5.55703	1.077	1.7312	1.93481	2.49977e-13	-1.54764	down	[Q]	Secondary metabolites biosynthesis, transport and catabolism	Molecular Function: oxidoreductase activity (GO:0016491);; Molecular Function: metal ion binding (GO:0046872);;	K05658|4.1e-116|cpep:111781709|K05658 ATP-binding cassette, subfamily B (MDR/TAP), member 1 [EC:7.6.2.2] | (RefSeq) uncharacterized protein LOC111781709	ABC transporters (ko02010)	[QR]	Secondary metabolites biosynthesis, transport and catabolism;; General function prediction only	non-haem dioxygenase in morphine synthesis N-terminal	Protein SRG1 OS=Arabidopsis thaliana OX=3702 GN=SRG1 PE=2 SV=1	Q	Secondary metabolites biosynthesis, transport and catabolism	unnamed protein product [Prunus armeniaca]
PaF106G0600021982.01	472	396	408	821	776	973	3.89012	3.88322	3.44616	7.43355	7.44895	8.16066	8.14828e-21	1.06917	up	[T]	Signal transduction mechanisms	Molecular Function: protein kinase activity (GO:0004672);; Molecular Function: ATP binding (GO:0005524);; Cellular Component: integral component of membrane (GO:0016021);;	K00924|6.9e-35|nto:104090210|K00924 kinase [EC:2.7.1.-] | (RefSeq) receptor-like protein kinase HSL1 isoform X1	--	--	--	Protein tyrosine and serine/threonine kinase	Protein MALE DISCOVERER 2 OS=Arabidopsis thaliana OX=3702 GN=MDIS2 PE=1 SV=1	T	Signal transduction mechanisms	PREDICTED: probable inactive receptor-like protein kinase At3g56050 [Prunus mume]
PaF106G0800030327.01	329	274	342	125	130	157	4.50354	4.47994	4.824	1.8574	2.07745	2.15349	3.63124e-09	-1.04783	down	[G]	Carbohydrate transport and metabolism	Molecular Function: UDP-glycosyltransferase activity (GO:0008194);;	K13691|2.6e-261|pper:18767225|K13691 pathogen-inducible salicylic acid glucosyltransferase [EC:2.4.1.-] | (RefSeq) UDP-glycosyltransferase 74G1	--	[GC]	Carbohydrate transport and metabolism;; Energy production and conversion	UDP-glucoronosyl and UDP-glucosyl transferase	UDP-glycosyltransferase 74G1 OS=Stevia rebaudiana OX=55670 GN=UGT74G1 PE=1 SV=1	--	--	UDP-glycosyltransferase 74G1-like [Prunus dulcis]
PaF106G0200010293.01	694	712	786	1566	1750	1718	8.6973	11.0444	10.2073	22.0086	25.6047	21.7317	1.11332e-24	1.25221	up	[G]	Carbohydrate transport and metabolism	Molecular Function: trehalose-phosphatase activity (GO:0004805);; Biological Process: trehalose biosynthetic process (GO:0005992);;	K01087|8.9e-226|pavi:110764757|K01087 trehalose 6-phosphate phosphatase [EC:3.1.3.12] | (RefSeq) trehalose-phosphate phosphatase A isoform X1	Starch and sucrose metabolism (ko00500)	[G]	Carbohydrate transport and metabolism	Trehalose-phosphatase	Trehalose-phosphate phosphatase A OS=Arabidopsis thaliana OX=3702 GN=TPPA PE=1 SV=1	G	Carbohydrate transport and metabolism	Haloacid dehalogenase-like hydrolase superfamily protein [Prunus dulcis]
PaF106G0300011999.01	21	38	9	61	70	121	0.19712	0.429776	0.08907	0.632735	0.781433	1.16852	0.000362394	1.30973	up	[C]	Energy production and conversion	Molecular Function: isocitrate lyase activity (GO:0004451);; Biological Process: carboxylic acid metabolic process (GO:0019752);; Molecular Function: metal ion binding (GO:0046872);;	K01637|0.0e+00|pmum:103329397|K01637 isocitrate lyase [EC:4.1.3.1] | (RefSeq) isocitrate lyase isoform X1	Glyoxylate and dicarboxylate metabolism (ko00630);; Carbon metabolism (ko01200)	[C]	Energy production and conversion	Isocitrate lyase family	Isocitrate lyase OS=Gossypium hirsutum OX=3635 PE=2 SV=1	C	Energy production and conversion	isocitrate lyase [Prunus sibirica]
PaF106G0100002222.01	15	4	4	69	52	81	0.229277	0.064109	0.048568	1.16852	0.928359	1.25418	4.09511e-09	2.11265	up	[O]	Posttranslational modification, protein turnover, chaperones	Molecular Function: electron carrier activity (GO:0009055);; Molecular Function: protein disulfide oxidoreductase activity (GO:0015035);;	K07390|5.5e-14|adu:107485934|K07390 monothiol glutaredoxin | (RefSeq) monothiol glutaredoxin-S7, chloroplastic	--	[O]	Posttranslational modification, protein turnover, chaperones	Glutaredoxin	Monothiol glutaredoxin-S11 OS=Oryza sativa subsp. japonica OX=39947 GN=GRXS11 PE=2 SV=2	O	Posttranslational modification, protein turnover, chaperones	unnamed protein product [Prunus armeniaca]
PaF106G0300011157.01	70	77	76	5	0	5	1.50458	1.92564	1.5445	0.075236	0	0.09822	5.72492e-14	-2.68451	down	[O]	Posttranslational modification, protein turnover, chaperones	Molecular Function: metalloendopeptidase activity (GO:0004222);; Cellular Component: integral component of endoplasmic reticulum membrane (GO:0030176);; Biological Process: CAAX-box protein processing (GO:0071586);;	--	--	--	--	Peptidase family M48	--	O	Posttranslational modification, protein turnover, chaperones	unnamed protein product [Prunus armeniaca]
PaF106G0100005726.01	1967	1551	1909	3546	3552	3661	22.1036	20.8562	22.1281	43.3749	46.5899	41.19	1.29876e-31	1.06769	up	[R]	General function prediction only	Molecular Function: hydrolase activity (GO:0016787);;	K21604|5.3e-273|pmum:103319809|K21604 jasmonoyl-L-amino acid hydrolase [EC:3.5.1.127] | (RefSeq) IAA-amino acid hydrolase ILR1-like 6	--	--	--	Peptidase family M20/M25/M40	IAA-amino acid hydrolase ILR1-like 6 OS=Arabidopsis thaliana OX=3702 GN=ILL6 PE=1 SV=2	S	Function unknown	unnamed protein product [Prunus armeniaca]
PaF106G0100001230.01	28	16	23	83	85	105	0.127794	0.086343	0.113006	0.435016	0.586145	0.585646	1.21376e-08	1.71295	up	[V]	Defense mechanisms	Molecular Function: ATP binding (GO:0005524);; Cellular Component: integral component of membrane (GO:0016021);; Molecular Function: ATPase activity (GO:0016887);; Molecular Function: ATPase activity, coupled to transmembrane movement of substances (GO:0042626);;	K05658|0.0e+00|pper:18789915|K05658 ATP-binding cassette, subfamily B (MDR/TAP), member 1 [EC:7.6.2.2] | (RefSeq) ABC transporter B family member 11	ABC transporters (ko02010)	[Q]	Secondary metabolites biosynthesis, transport and catabolism	ABC transporter transmembrane region	ABC transporter B family member 11 OS=Arabidopsis thaliana OX=3702 GN=ABCB11 PE=2 SV=1	Q	Secondary metabolites biosynthesis, transport and catabolism	unnamed protein product [Prunus armeniaca]
PaF106G0200007395.01	361	424	330	1005	902	1230	1.68782	2.39106	1.58363	5.08813	5.00442	5.82514	5.56999e-24	1.49635	up	[R]	General function prediction only	Molecular Function: ADP binding (GO:0043531);;	K12818|7.4e-213|mtr:MTR_0267s0070|K12818 ATP-dependent RNA helicase DHX8/PRP22 [EC:3.6.4.13] | (RefSeq) NB-ARC domain disease resistance protein, putative	Spliceosome (ko03040)	[T]	Signal transduction mechanisms	NB-ARC domain	Putative disease resistance RPP13-like protein 1 OS=Arabidopsis thaliana OX=3702 GN=RPPL1 PE=3 SV=1	T	Signal transduction mechanisms	PREDICTED: LOW QUALITY PROTEIN: putative disease resistance RPP13-like protein 1 [Prunus mume]
PaF106G0300013768.01	1704	1475	1869	632	574	878	12.9494	13.4176	14.6544	5.22748	5.08528	6.68174	6.28244e-22	-1.16811	down	[M]	Cell wall/membrane/envelope biogenesis	Cellular Component: integral component of membrane (GO:0016021);;	--	--	[M]	Cell wall/membrane/envelope biogenesis	Glycosyl-transferase family 4	--	M	Cell wall/membrane/envelope biogenesis	unnamed protein product [Prunus armeniaca]
PaF106G0400016638.01	302	232	244	115	93	122	2.07767	1.89551	1.72818	0.861068	0.738993	0.832117	4.73374e-08	-1.06863	down	[M]	Cell wall/membrane/envelope biogenesis	Molecular Function: protein serine/threonine kinase activity (GO:0004674);; Molecular Function: ATP binding (GO:0005524);; Cellular Component: plasma membrane (GO:0005886);; Cellular Component: integral component of membrane (GO:0016021);; Biological Process: protein autophosphorylation (GO:0046777);;	K01180|9.4e-67|cmax:111487562|K01180 endo-1,3(4)-beta-glucanase [EC:3.2.1.6] | (RefSeq) uncharacterized protein LOC111487562	--	--	--	Protein tyrosine and serine/threonine kinase	Probable LRR receptor-like serine/threonine-protein kinase At1g56140 OS=Arabidopsis thaliana OX=3702 GN=At1g56140 PE=2 SV=2	T	Signal transduction mechanisms	PREDICTED: probable LRR receptor-like serine/threonine-protein kinase At1g56130 [Prunus mume]
PaF106G0200010358.01	638	616	451	202	221	286	6.23551	7.20664	4.54807	2.14859	2.51474	2.79318	5.19207e-10	-1.12112	down	[O]	Posttranslational modification, protein turnover, chaperones	Molecular Function: protein kinase activity (GO:0004672);; Molecular Function: ATP binding (GO:0005524);; Cellular Component: integral component of membrane (GO:0016021);;	K13418|1.3e-46|peq:110028906|K13418 somatic embryogenesis receptor kinase 1 [EC:2.7.10.1 2.7.11.1] | (RefSeq) LRR receptor kinase BAK1-like	--	--	--	Protein tyrosine and serine/threonine kinase	LRR receptor kinase SERK2 OS=Oryza sativa subsp. japonica OX=39947 GN=SERK2 PE=1 SV=1	T	Signal transduction mechanisms	unnamed protein product [Prunus armeniaca]
PaF106G0400016906.01	350	327	337	90	102	123	5.61379	6.27026	5.58372	1.55943	1.90029	1.96395	9.99692e-17	-1.50597	down	[P]	Inorganic ion transport and metabolism	Molecular Function: zinc ion transmembrane transporter activity (GO:0005385);; Cellular Component: plasma membrane (GO:0005886);; Cellular Component: membrane (GO:0016020);; Cellular Component: integral component of membrane (GO:0016021);; Biological Process: zinc II ion transmembrane transport (GO:0071577);;	K14709|1.2e-181|pmum:103325500|K14709 solute carrier family 39 (zinc transporter), member 1/2/3 | (RefSeq) zinc transporter 8-like	--	[P]	Inorganic ion transport and metabolism	ZIP Zinc transporter	Zinc transporter 1 OS=Arabidopsis thaliana OX=3702 GN=ZIP1 PE=2 SV=1	P	Inorganic ion transport and metabolism	unnamed protein product [Prunus armeniaca]
PaF106G0500019669.01	148	100	122	312	269	291	1.00254	0.811442	0.855608	2.30861	2.13489	1.97753	6.92027e-11	1.24686	up	[P]	Inorganic ion transport and metabolism	Molecular Function: copper ion binding (GO:0005507);; Molecular Function: ATP binding (GO:0005524);; Cellular Component: integral component of membrane (GO:0016021);; Molecular Function: copper-transporting ATPase activity (GO:0043682);;	K17686|0.0e+00|pavi:110758031|K17686 P-type Cu+ transporter [EC:7.2.2.8] | (RefSeq) probable copper-transporting ATPase HMA5	MAPK signaling pathway - plant (ko04016)	[P]	Inorganic ion transport and metabolism	E1-E2 ATPase	Probable copper-transporting ATPase HMA5 OS=Arabidopsis thaliana OX=3702 GN=HMA5 PE=1 SV=2	P	Inorganic ion transport and metabolism	probable copper-transporting ATPase HMA5 [Prunus avium]
PaF106G0100005230.01	289	141	138	523	445	556	5.95126	3.46996	2.92039	11.7042	10.6775	11.4443	7.63076e-11	1.3982	up	[G]	Carbohydrate transport and metabolism	Molecular Function: channel activity (GO:0015267);; Cellular Component: integral component of membrane (GO:0016021);;	K09873|2.4e-136|pavi:110761269|K09873 aquaporin TIP | (RefSeq) aquaporin TIP4-1	--	[G]	Carbohydrate transport and metabolism	Major intrinsic protein	Aquaporin TIP4-1 OS=Arabidopsis thaliana OX=3702 GN=TIP4-1 PE=2 SV=1	G	Carbohydrate transport and metabolism	aquaporin TIP4-1 [Prunus avium]
PaF106G0300012225.01	252	166	299	19	40	37	4.74436	3.73945	5.79832	0.383191	0.869663	0.692261	2.44661e-18	-2.36153	down	[M]	Cell wall/membrane/envelope biogenesis	Biological Process: response to acid chemical (GO:0001101);; Molecular Function: molecular_function (GO:0003674);; Molecular Function: nucleic acid binding (GO:0003676);; Molecular Function: RNA binding (GO:0003723);; Molecular Function: mRNA binding (GO:0003729);; Molecular Function: binding (GO:0005488);; Cellular Component: cellular_component (GO:0005575);; Cellular Component: intracellular (G…	K20285|1.7e-11|smo:SELMODRAFT_441110|K20285 Rab9 effector protein with kelch motifs | (RefSeq) hypothetical protein	--	[R]	General function prediction only	Galactose oxidase, central domain	Nitrile-specifier protein 2 OS=Arabidopsis thaliana OX=3702 GN=NSP2 PE=2 SV=1	S	Function unknown	unnamed protein product [Prunus armeniaca]
PaF106G0500020327.01	7215	5088	7302	2802	2326	3049	103.334	87.2096	107.867	43.6707	38.8867	43.7213	3.91998e-28	-1.14539	down	[IR]	Lipid transport and metabolism;; General function prediction only	Molecular Function: hydrolase activity, acting on ester bonds (GO:0016788);;	K01206|1.5e-39|boe:106299976|K01206 alpha-L-fucosidase [EC:3.2.1.51] | (RefSeq) alpha-L-fucosidase 3	Other glycan degradation (ko00511)	--	--	GDSL-like Lipase/Acylhydrolase	GDSL esterase/lipase At3g48460 OS=Arabidopsis thaliana OX=3702 GN=At3g48460 PE=2 SV=1	S	Function unknown	unnamed protein product [Prunus armeniaca]
PaF106G0300013116.01	29	8	6	125	95	176	0.496048	0.150029	0.093292	2.39514	1.95487	3.1172	1.82888e-12	2.37103	up	[H]	Coenzyme transport and metabolism	Molecular Function: O-methyltransferase activity (GO:0008171);; Molecular Function: S-adenosylmethionine-dependent methyltransferase activity (GO:0008757);; Biological Process: aromatic compound biosynthetic process (GO:0019438);; Biological Process: methylation (GO:0032259);; Molecular Function: protein dimerization activity (GO:0046983);;	K16040|3.1e-154|pmum:103328492|K16040 trans-resveratrol di-O-methyltransferase [EC:2.1.1.240] | (RefSeq) trans-resveratrol di-O-methyltransferase-like	Stilbenoid, diarylheptanoid and gingerol biosynthesis (ko00945)	[R]	General function prediction only	O-methyltransferase domain	Probable O-methyltransferase 3 OS=Humulus lupulus OX=3486 GN=OMT3 PE=2 SV=1	S	Function unknown	trans-resveratrol di-O-methyltransferase-like [Prunus persica]
PaF106G0800032154.01	40	33	37	123	119	139	0.223161	0.216706	0.208139	0.744409	0.771588	0.777069	2.83444e-10	1.63024	up	[R]	General function prediction only	Biological Process: signal transduction (GO:0007165);; Molecular Function: ADP binding (GO:0043531);;	K00695|7.3e-127|mtr:MTR_6g478030|K00695 sucrose synthase [EC:2.4.1.13] | (RefSeq) sucrose synthase	Starch and sucrose metabolism (ko00500)	--	--	TIR domain	TMV resistance protein N OS=Nicotiana glutinosa OX=35889 GN=N PE=1 SV=1	S	Function unknown	TMV resistance protein N [Prunus persica]
PaF106G0800029463.01	525	326	562	68	37	172	4.4912	3.3335	4.96198	0.63379	0.361618	1.47236	0.000226638	-1.41553	down	[P]	Inorganic ion transport and metabolism	Biological Process: potassium ion transport (GO:0006813);; Molecular Function: potassium ion transmembrane transporter activity (GO:0015079);; Cellular Component: membrane (GO:0016020);; Cellular Component: integral component of membrane (GO:0016021);;	K03549|0.0e+00|pmum:103333887|K03549 KUP system potassium uptake protein | (RefSeq) potassium transporter 5-like	--	--	--	K+ potassium transporter	Potassium transporter 5 OS=Oryza sativa subsp. japonica OX=39947 GN=HAK5 PE=2 SV=2	P	Inorganic ion transport and metabolism	unnamed protein product [Prunus armeniaca]
PaF106G0200008436.01	57	34	37	259	364	397	0.325144	0.239773	0.218787	1.91812	2.4929	2.34039	1.8966e-34	2.76257	up	[R]	General function prediction only	Biological Process: signal transduction (GO:0007165);; Molecular Function: ADP binding (GO:0043531);;	K00695|7.7e-116|mtr:MTR_6g478030|K00695 sucrose synthase [EC:2.4.1.13] | (RefSeq) sucrose synthase	Starch and sucrose metabolism (ko00500)	--	--	TIR domain	Disease resistance protein RUN1 OS=Vitis rotundifolia OX=103349 GN=RUN1 PE=1 SV=1	S	Function unknown	PREDICTED: TMV resistance protein N-like [Prunus mume]
PaF106G0400017389.01	65	45	51	202	162	239	2.57044	2.00195	2.08896	6.19291	5.14333	6.29889	4.17555e-15	1.78727	up	[R]	General function prediction only	Cellular Component: cellular_component (GO:0005575);; Cellular Component: intracellular (GO:0005622);; Cellular Component: cell (GO:0005623);; Cellular Component: cytoplasm (GO:0005737);; Cellular Component: chloroplast (GO:0009507);; Cellular Component: plastid envelope (GO:0009526);; Cellular Component: plastid stroma (GO:0009532);; Cellular Component: chloroplast thylakoid (GO:0009534);; Cellu…	--	--	[G]	Carbohydrate transport and metabolism	NAD(P)H-binding	Uncharacterized protein At2g34460, chloroplastic OS=Arabidopsis thaliana OX=3702 GN=At2g34460 PE=1 SV=1	G	Carbohydrate transport and metabolism	uncharacterized protein At2g34460, chloroplastic-like [Prunus dulcis]
PaF106G0100005281.01	603	473	680	280	242	271	16.4827	15.4733	19.17	8.32065	7.73071	7.40821	1.94693e-10	-1.00483	down	[P]	Inorganic ion transport and metabolism	Biological Process: response to hypoxia (GO:0001666);; Molecular Function: oxygen transporter activity (GO:0005344);; Molecular Function: oxygen binding (GO:0019825);; Molecular Function: heme binding (GO:0020037);;	K02349|7.5e-36|csat:104730000|K02349 DNA polymerase theta [EC:2.7.7.7] | (RefSeq) helicase and polymerase-containing protein TEBICHI-like isoform X1	--	--	--	Bacterial-like globin	Two-on-two hemoglobin-3 OS=Arabidopsis thaliana OX=3702 GN=GLB3 PE=1 SV=1	S	Function unknown	unnamed protein product [Prunus armeniaca]
PaF106G0100000986.01	163	139	104	292	287	247	1.65432	1.69811	1.0901	3.24284	3.41898	2.52326	4.11754e-06	1.02425	up	[J]	Translation, ribosomal structure and biogenesis	Molecular Function: tRNA binding (GO:0000049);; Molecular Function: lysine-tRNA ligase activity (GO:0004824);; Molecular Function: ATP binding (GO:0005524);; Cellular Component: cytosol (GO:0005829);; Biological Process: lysyl-tRNA aminoacylation (GO:0006430);; Cellular Component: integral component of membrane (GO:0016021);;	K04567|0.0e+00|pper:18791418|K04567 lysyl-tRNA synthetase, class II [EC:6.1.1.6] | (RefSeq) lysine--tRNA ligase, cytoplasmic isoform X1	Aminoacyl-tRNA biosynthesis (ko00970)	[J]	Translation, ribosomal structure and biogenesis	tRNA synthetases class II (D, K and N)	Lysine--tRNA ligase, cytoplasmic OS=Arabidopsis thaliana OX=3702 GN=At3g11710 PE=1 SV=1	J	Translation, ribosomal structure and biogenesis	lysine--tRNA ligase, cytoplasmic isoform X2 [Prunus persica]
PaF106G0100000244.01	217	413	322	714	552	889	1.35537	3.09731	2.08288	4.88561	4.05282	5.59313	8.59587e-07	1.109	up	[R]	General function prediction only	Biological Process: signal transduction (GO:0007165);; Molecular Function: ADP binding (GO:0043531);;	K00695|2.7e-163|mtr:MTR_6g478030|K00695 sucrose synthase [EC:2.4.1.13] | (RefSeq) sucrose synthase	Starch and sucrose metabolism (ko00500)	--	--	TIR domain	Disease resistance protein RPV1 OS=Vitis rotundifolia OX=103349 GN=RPV1 PE=1 SV=1	T	Signal transduction mechanisms	PREDICTED: TMV resistance protein N-like [Prunus mume]
PaF106G0400017065.01	408	299	300	52	70	79	4.00601	3.49336	3.02525	0.546692	0.79955	0.770692	2.00493e-23	-2.04813	down	[R]	General function prediction only	Molecular Function: protein kinase activity (GO:0004672);; Molecular Function: ATP binding (GO:0005524);; Cellular Component: integral component of membrane (GO:0016021);;	K01180|3.3e-71|cmax:111487562|K01180 endo-1,3(4)-beta-glucanase [EC:3.2.1.6] | (RefSeq) uncharacterized protein LOC111487562	--	--	--	Protein kinase domain	Probable LRR receptor-like serine/threonine-protein kinase At1g56140 OS=Arabidopsis thaliana OX=3702 GN=At1g56140 PE=2 SV=2	T	Signal transduction mechanisms	hypothetical protein PRUPE_4G104500 [Prunus persica]
PaF106G0200006841.01	589	484	473	2656	2355	3120	7.32867	7.2337	5.91411	35.1409	33.4731	38.2554	1.0177e-136	2.43327	up	[G]	Carbohydrate transport and metabolism	Biological Process: carbohydrate metabolic process (GO:0005975);; Molecular Function: beta-glucosidase activity (GO:0008422);;	K22279|2.4e-303|pmum:103330511|K22279 vicianin beta-glucosidase [EC:3.2.1.119] | (RefSeq) vicianin hydrolase isoform X1	--	[G]	Carbohydrate transport and metabolism	Glycosyl hydrolase family 1	Vicianin hydrolase (Fragment) OS=Vicia sativa subsp. nigra OX=3909 PE=1 SV=1	G	Carbohydrate transport and metabolism	PREDICTED: vicianin hydrolase isoform X1 [Prunus mume]
PaF106G0800032607.01	112	123	104	16	37	60	0.597114	0.784997	0.57252	0.092009	0.23022	0.318647	0.000347205	-1.18544	down	[R]	General function prediction only	Biological Process: signal transduction (GO:0007165);; Molecular Function: ADP binding (GO:0043531);;	K00695|1.8e-123|mtr:MTR_6g478030|K00695 sucrose synthase [EC:2.4.1.13] | (RefSeq) sucrose synthase	Starch and sucrose metabolism (ko00500)	--	--	TIR domain	TMV resistance protein N OS=Nicotiana glutinosa OX=35889 GN=N PE=1 SV=1	S	Function unknown	PREDICTED: TMV resistance protein N-like [Prunus mume]
PaF106G0700027494.01	230	252	236	574	790	834	3.03201	3.97422	3.20285	8.23784	12.171	11.0173	7.92067e-22	1.60378	up	[R]	General function prediction only	Molecular Function: phospholipase activity (GO:0004620);; Biological Process: lipid catabolic process (GO:0016042);; Molecular Function: acylglycerol lipase activity (GO:0047372);;	K16815|7.0e-06|gsl:Gasu_03780|K16815 calcium-independent phospholipase A2-gamma | (RefSeq) hypothetical protein	--	[I]	Lipid transport and metabolism	Patatin-like phospholipase	Patatin-like protein 2 OS=Arabidopsis thaliana OX=3702 GN=PLP2 PE=1 SV=1	I	Lipid transport and metabolism	PREDICTED: patatin-like protein 3 isoform X1 [Prunus mume]
PaF106G0200009654.01	345	223	315	38	42	51	6.47478	5.00101	6.09429	0.762908	0.95694	0.967804	5.13405e-28	-2.39917	down	[M]	Cell wall/membrane/envelope biogenesis	Molecular Function: protein kinase activity (GO:0004672);; Molecular Function: ATP binding (GO:0005524);;	K05391|6.6e-21|pper:18792510|K05391 cyclic nucleotide gated channel, plant | (RefSeq) cyclic nucleotide-gated ion channel 1 isoform X1	Plant-pathogen interaction (ko04626)	--	--	Protein kinase domain	Wall-associated receptor kinase 3 OS=Arabidopsis thaliana OX=3702 GN=WAK3 PE=2 SV=2	T	Signal transduction mechanisms	wall-associated receptor kinase 3-like [Prunus yedoensis var. nudiflora]
PaF106G0800031976.01	2757	2290	2534	1039	995	1145	18.9445	18.8124	17.9149	7.75308	7.95443	7.84115	1.20962e-44	-1.14977	down	[P]	Inorganic ion transport and metabolism	Molecular Function: potassium ion transmembrane transporter activity (GO:0015079);; Cellular Component: integral component of membrane (GO:0016021);;	K03549|3.2e-273|tcc:18609410|K03549 KUP system potassium uptake protein | (RefSeq) putative potassium transporter 12	--	--	--	K+ potassium transporter	Potassium transporter 7 OS=Arabidopsis thaliana OX=3702 GN=POT7 PE=1 SV=2	P	Inorganic ion transport and metabolism	PREDICTED: potassium transporter 7 [Prunus mume]
PaF106G0300014581.01	6722	2605	3292	13024	13754	11448	67.0654	31.0962	33.8754	141.419	160.173	114.35	6.68976e-05	1.32811	up	[GI]	Carbohydrate transport and metabolism;; Lipid transport and metabolism	Molecular Function: enzyme inhibitor activity (GO:0004857);; Cellular Component: integral component of membrane (GO:0016021);; Molecular Function: pectinesterase activity (GO:0030599);; Biological Process: cell wall modification (GO:0042545);; Molecular Function: aspartyl esterase activity (GO:0045330);; Biological Process: pectin catabolic process (GO:0045490);;	K01051|0.0e+00|pmum:103327267|K01051 pectinesterase [EC:3.1.1.11] | (RefSeq) pectinesterase	Pentose and glucuronate interconversions (ko00040)	--	--	Pectinesterase	Pectinesterase 4 OS=Arabidopsis thaliana OX=3702 GN=PME4 PE=2 SV=1	G	Carbohydrate transport and metabolism	unnamed protein product [Prunus armeniaca]
PaF106G0800032576.01	62	41	51	291	157	310	1.1453	0.850635	0.843802	5.77375	3.25958	5.69557	8.16492e-17	2.07741	up	[P]	Inorganic ion transport and metabolism	Molecular Function: carbonate dehydratase activity (GO:0004089);; Molecular Function: zinc ion binding (GO:0008270);; Biological Process: cyanate catabolic process (GO:0009440);; Biological Process: carbon utilization (GO:0015976);;	K01673|1.5e-144|pmum:103341852|K01673 carbonic anhydrase [EC:4.2.1.1] | (RefSeq) carbonic anhydrase 2-like	Nitrogen metabolism (ko00910)	[P]	Inorganic ion transport and metabolism	Carbonic anhydrase	Beta carbonic anhydrase 2, chloroplastic OS=Arabidopsis thaliana OX=3702 GN=BCA2 PE=1 SV=3	P	Inorganic ion transport and metabolism	unnamed protein product [Prunus armeniaca]
PaF106G0600022891.01	1013	623	652	1185	2074	1657	6.81142	4.97631	4.59524	8.56026	16.0339	11.0716	0.000460436	1.02157	up	[T]	Signal transduction mechanisms	Molecular Function: protein serine/threonine kinase activity (GO:0004674);; Molecular Function: ATP binding (GO:0005524);; Cellular Component: plasma membrane (GO:0005886);; Biological Process: protein autophosphorylation (GO:0046777);;	K13416|1.0e-44|cam:101506449|K13416 brassinosteroid insensitive 1-associated receptor kinase 1 [EC:2.7.10.1 2.7.11.1] | (RefSeq) BRASSINOSTEROID INSENSITIVE 1-associated receptor kinase 1	MAPK signaling pathway - plant (ko04016);; Plant hormone signal transduction (ko04075);; Plant-pathogen interaction (ko04626)	--	--	Protein tyrosine and serine/threonine kinase	Probable LRR receptor-like serine/threonine-protein kinase At1g53430 OS=Arabidopsis thaliana OX=3702 GN=At1g53430 PE=1 SV=1	T	Signal transduction mechanisms	PREDICTED: probable LRR receptor-like serine/threonine-protein kinase At1g53420 [Prunus mume]
PaF106G0200008354.01	49	34	27	221	254	210	0.290944	0.293786	0.162073	1.7599	1.97258	1.70033	9.79627e-22	2.38816	up	[R]	General function prediction only	Biological Process: signal transduction (GO:0007165);; Molecular Function: ADP binding (GO:0043531);;	K00695|1.1e-114|mtr:MTR_6g478030|K00695 sucrose synthase [EC:2.4.1.13] | (RefSeq) sucrose synthase	Starch and sucrose metabolism (ko00500)	--	--	TIR domain	Disease resistance protein RUN1 OS=Vitis rotundifolia OX=103349 GN=RUN1 PE=1 SV=1	S	Function unknown	TMV resistance protein N isoform X1 [Prunus persica]
PaF106G0700026579.01	436	363	377	99	106	102	8.43112	8.39944	7.50679	2.06748	2.39252	1.9592	4.18794e-23	-1.73526	down	[R]	General function prediction only	Molecular Function: O-methyltransferase activity (GO:0008171);; Biological Process: methylation (GO:0032259);;	K00588|3.9e-131|pavi:110750978|K00588 caffeoyl-CoA O-methyltransferase [EC:2.1.1.104] | (RefSeq) probable caffeoyl-CoA O-methyltransferase At4g26220	Phenylpropanoid biosynthesis (ko00940);; Flavonoid biosynthesis (ko00941);; Stilbenoid, diarylheptanoid and gingerol biosynthesis (ko00945)	[Q]	Secondary metabolites biosynthesis, transport and catabolism	O-methyltransferase	Probable caffeoyl-CoA O-methyltransferase At4g26220 OS=Arabidopsis thaliana OX=3702 GN=At4g26220 PE=2 SV=1	Q	Secondary metabolites biosynthesis, transport and catabolism	probable caffeoyl-CoA O-methyltransferase At4g26220 [Prunus avium]
PaF106G0300013726.01	611	510	631	155	116	179	8.64842	8.64973	9.2219	2.38025	1.91021	2.52706	5.92018e-30	-1.79049	down	[P]	Inorganic ion transport and metabolism	Molecular Function: molybdate ion transmembrane transporter activity (GO:0015098);; Cellular Component: integral component of membrane (GO:0016021);;	--	--	--	--	Molybdate transporter of MFS superfamily	Molybdate transporter 2 OS=Arabidopsis thaliana OX=3702 GN=MOT2 PE=1 SV=2	S	Function unknown	PREDICTED: molybdate transporter 2 [Prunus mume]
PaF106G0500021274.01	924	493	743	1619	1525	1989	17.3931	11.1012	14.4241	33.1661	33.5168	37.4807	1.09662e-19	1.29799	up	[T]	Signal transduction mechanisms	Molecular Function: acid phosphatase activity (GO:0003993);; Molecular Function: ferrous iron binding (GO:0008198);; Molecular Function: ferric iron binding (GO:0008199);; Cellular Component: integral component of membrane (GO:0016021);;	K14379|6.0e-191|pmum:103338913|K14379 tartrate-resistant acid phosphatase type 5 [EC:3.1.3.2] | (RefSeq) purple acid phosphatase 3-like	Riboflavin metabolism (ko00740)	[O]	Posttranslational modification, protein turnover, chaperones	Calcineurin-like phosphoesterase	Purple acid phosphatase 3 OS=Arabidopsis thaliana OX=3702 GN=PAP3 PE=2 SV=1	O	Posttranslational modification, protein turnover, chaperones	unnamed protein product [Prunus armeniaca]
Prunus_sibirica_newGene_317	186	140	181	338	344	408	1.94227	1.82233	2.07627	4.27654	4.54601	4.12523	3.73273e-12	1.13647	up	[M]	Cell wall/membrane/envelope biogenesis	Molecular Function: protein serine/threonine kinase activity (GO:0004674);; Molecular Function: ATP binding (GO:0005524);; Cellular Component: plasma membrane (GO:0005886);; Cellular Component: integral component of membrane (GO:0016021);; Biological Process: protein autophosphorylation (GO:0046777);;	K13418|1.0e-70|oeu:111372301|K13418 somatic embryogenesis receptor kinase 1 [EC:2.7.10.1 2.7.11.1] | (RefSeq) somatic embryogenesis receptor kinase 2	--	--	--	Protein kinase domain	Probable LRR receptor-like serine/threonine-protein kinase At1g56140 OS=Arabidopsis thaliana OX=3702 GN=At1g56140 PE=2 SV=2	T	Signal transduction mechanisms	probable LRR receptor-like serine/threonine-protein kinase At1g56130 [Prunus dulcis]
PaF106G0400017975.01	4	6	8	121	146	182	0.029978	0.057669	0.058029	1.09938	1.4212	1.50624	6.42792e-31	3.53377	up	[T]	Signal transduction mechanisms	Molecular Function: protein serine/threonine kinase activity (GO:0004674);; Molecular Function: ATP binding (GO:0005524);; Cellular Component: integral component of membrane (GO:0016021);; Biological Process: recognition of pollen (GO:0048544);;	K24104|2.4e-74|thj:104799061|K24104 GPN-loop GTPase | (RefSeq) LOW QUALITY PROTEIN: uncharacterized protein LOC104799061	--	--	--	Protein tyrosine and serine/threonine kinase	G-type lectin S-receptor-like serine/threonine-protein kinase At1g61500 OS=Arabidopsis thaliana OX=3702 GN=At1g61500 PE=2 SV=2	S	Function unknown	PREDICTED: G-type lectin S-receptor-like serine/threonine-protein kinase At1g61500 [Prunus mume]
PaF106G0200007291.01	224	201	169	104	32	72	0.800094	0.867162	0.629193	0.40636	0.130397	0.257413	9.47261e-05	-1.17743	down	[R]	General function prediction only	Molecular Function: ADP binding (GO:0043531);;	K12818|8.0e-169|mtr:MTR_0267s0070|K12818 ATP-dependent RNA helicase DHX8/PRP22 [EC:3.6.4.13] | (RefSeq) NB-ARC domain disease resistance protein, putative	Spliceosome (ko03040)	[T]	Signal transduction mechanisms	NB-ARC domain	Putative disease resistance RPP13-like protein 1 OS=Arabidopsis thaliana OX=3702 GN=RPPL1 PE=3 SV=1	T	Signal transduction mechanisms	PREDICTED: LOW QUALITY PROTEIN: putative disease resistance RPP13-like protein 1 [Prunus mume]
PaF106G0500019877.01	202	167	190	45	22	51	4.32819	4.27836	4.19761	1.04821	0.533199	1.089	6.12185e-13	-1.87064	down	[R]	General function prediction only	--	K07020|8.0e-129|pavi:110760610|K07020 uncharacterized protein | (RefSeq) KAT8 regulatory NSL complex subunit 3	--	[R]	General function prediction only	Alpha/beta hydrolase family	--	S	Function unknown	unnamed protein product [Prunus armeniaca]
PaF106G0100002451.01	471	499	503	226	190	248	2.77149	3.54921	3.15214	1.44639	1.30482	1.46154	1.44784e-10	-1.02337	down	[L]	Replication, recombination and repair	Molecular Function: helicase activity (GO:0004386);;	K10706|3.7e-255|vvi:100262126|K10706 senataxin [EC:3.6.4.-] | (RefSeq) uncharacterized LOC100262126	--	[A]	RNA processing and modification	AAA domain	--	A	RNA processing and modification	PREDICTED: uncharacterized protein LOC103322333 [Prunus mume]
PaF106G0200007080.01	198	198	185	539	601	507	6.62148	7.90349	6.37785	19.5974	23.458	16.9615	2.19697e-18	1.50936	up	[Q]	Secondary metabolites biosynthesis, transport and catabolism	--	--	--	--	--	Glyoxalase/Bleomycin resistance protein/Dioxygenase superfamily	--	S	Function unknown	unnamed protein product [Prunus armeniaca]
PaF106G0600024634.01	506	410	465	849	859	1186	4.75955	4.60859	4.50726	8.69861	9.78282	11.7408	3.25514e-20	1.11697	up	[T]	Signal transduction mechanisms	Molecular Function: protein kinase activity (GO:0004672);; Molecular Function: ATP binding (GO:0005524);; Cellular Component: integral component of membrane (GO:0016021);; Molecular Function: carbohydrate binding (GO:0030246);;	K01176|1.1e-69|sbi:8065370|K01176 alpha-amylase [EC:3.2.1.1] | (RefSeq) alpha-amylase isozyme 2A	Starch and sucrose metabolism (ko00500)	--	--	Legume lectin domain	L-type lectin-domain containing receptor kinase IV.1 OS=Arabidopsis thaliana OX=3702 GN=LECRK41 PE=2 SV=1	T	Signal transduction mechanisms	PREDICTED: L-type lectin-domain containing receptor kinase IV.1-like [Prunus mume]
PaF106G0200008425.01	22	16	13	67	121	88	0.185629	0.160675	0.104951	0.60765	1.18548	0.741675	5.91887e-09	1.91032	up	[R]	General function prediction only	Biological Process: signal transduction (GO:0007165);; Molecular Function: ADP binding (GO:0043531);;	K00695|7.1e-81|mtr:MTR_6g478030|K00695 sucrose synthase [EC:2.4.1.13] | (RefSeq) sucrose synthase	Starch and sucrose metabolism (ko00500)	--	--	NB-ARC domain	Disease resistance protein RUN1 OS=Vitis rotundifolia OX=103349 GN=RUN1 PE=1 SV=1	--	--	TMV resistance protein N-like [Prunus avium]
PaF106G0800031951.01	5278	4577	5250	2233	2011	2206	54.6878	57.5557	56.3627	26.0303	25.1191	23.5679	5.76505e-40	-1.12099	down	[F]	Nucleotide transport and metabolism	Molecular Function: magnesium ion binding (GO:0000287);; Molecular Function: adenylosuccinate synthase activity (GO:0004019);; Molecular Function: GTP binding (GO:0005525);; Cellular Component: cytoplasm (GO:0005737);; Cellular Component: chloroplast (GO:0009507);; Biological Process: 'de novo' AMP biosynthetic process (GO:0044208);; Biological Process: IMP metabolic process (GO:0046040);;	K01939|5.6e-286|pper:18768320|K01939 adenylosuccinate synthase [EC:6.3.4.4] | (RefSeq) adenylosuccinate synthetase 2, chloroplastic	Purine metabolism (ko00230);; Alanine, aspartate and glutamate metabolism (ko00250)	[F]	Nucleotide transport and metabolism	Adenylosuccinate synthetase	Adenylosuccinate synthetase 2, chloroplastic OS=Ricinus communis OX=3988 GN=PURA2 PE=3 SV=1	F	Nucleotide transport and metabolism	unnamed protein product [Prunus armeniaca]
PaF106G0100004499.01	820	1034	918	429	302	475	18.0196	27.1795	20.8004	10.2545	7.72403	10.4388	3.46432e-10	-1.07726	down	[FV]	Nucleotide transport and metabolism;; Defense mechanisms	Molecular Function: magnesium ion binding (GO:0000287);; Molecular Function: dUTP diphosphatase activity (GO:0004170);; Biological Process: dUMP biosynthetic process (GO:0006226);; Biological Process: dUTP catabolic process (GO:0046081);;	K01520|1.8e-118|pmum:103320833|K01520 dUTP pyrophosphatase [EC:3.6.1.23] | (RefSeq) deoxyuridine 5'-triphosphate nucleotidohydrolase	Pyrimidine metabolism (ko00240)	[F]	Nucleotide transport and metabolism	dUTPase	Deoxyuridine 5'-triphosphate nucleotidohydrolase OS=Arabidopsis thaliana OX=3702 GN=DUT PE=1 SV=1	F	Nucleotide transport and metabolism	unnamed protein product [Prunus armeniaca]
PaF106G0100003751.01	1328	1191	1542	3369	2786	2933	18.9608	20.353	22.711	52.3594	46.4481	41.9405	1.09112e-23	1.22245	up	[E]	Amino acid transport and metabolism	Biological Process: glutamine metabolic process (GO:0006541);; Molecular Function: hydrolase activity (GO:0016787);;	--	--	--	--	Peptidase C26	Putative glutamine amidotransferase GAT1_2.1 OS=Arabidopsis thaliana OX=3702 GN=GAT1_2.1 PE=2 SV=1	F	Nucleotide transport and metabolism	unnamed protein product [Prunus armeniaca]
PaF106G0400017491.01	325	323	361	1231	1532	1930	2.23167	2.62097	2.47333	8.92741	12.0212	12.9298	2.2585e-57	2.20834	up	[M]	Cell wall/membrane/envelope biogenesis	Molecular Function: protein serine/threonine kinase activity (GO:0004674);; Molecular Function: ATP binding (GO:0005524);; Cellular Component: plasma membrane (GO:0005886);; Cellular Component: integral component of membrane (GO:0016021);; Biological Process: protein autophosphorylation (GO:0046777);;	K13416|1.4e-50|han:110928984|K13416 brassinosteroid insensitive 1-associated receptor kinase 1 [EC:2.7.10.1 2.7.11.1] | (RefSeq) BRASSINOSTEROID INSENSITIVE 1-associated receptor kinase 1-like isoform X1	MAPK signaling pathway - plant (ko04016);; Plant hormone signal transduction (ko04075);; Plant-pathogen interaction (ko04626)	--	--	Protein tyrosine and serine/threonine kinase	Probable LRR receptor-like serine/threonine-protein kinase At1g07650 OS=Arabidopsis thaliana OX=3702 GN=At1g07650 PE=1 SV=1	T	Signal transduction mechanisms	PREDICTED: probable leucine-rich repeat receptor-like serine/threonine-protein kinase At3g14840 [Prunus mume]
PaF106G0400017829.01	273	203	266	0	0	0	6.19329	5.54563	6.18215	0	0	0	6.55516e-57	-5.0889	down	[O]	Posttranslational modification, protein turnover, chaperones	Molecular Function: electron carrier activity (GO:0009055);; Molecular Function: protein disulfide oxidoreductase activity (GO:0015035);;	K07390|8.1e-14|adu:107485934|K07390 monothiol glutaredoxin | (RefSeq) monothiol glutaredoxin-S7, chloroplastic	--	[O]	Posttranslational modification, protein turnover, chaperones	Glutaredoxin	Monothiol glutaredoxin-S11 OS=Oryza sativa subsp. japonica OX=39947 GN=GRXS11 PE=2 SV=2	O	Posttranslational modification, protein turnover, chaperones	monothiol glutaredoxin-S17 [Prunus dulcis]
PaF106G0100004650.01	16	43	28	82	98	135	0.21698	0.698649	0.383846	1.20209	1.53947	1.8282	1.39211e-05	1.44221	up	[G]	Carbohydrate transport and metabolism	Cellular Component: integral component of membrane (GO:0016021);;	--	--	--	--	BT1 family	Probable folate-biopterin transporter 6 OS=Arabidopsis thaliana OX=3702 GN=At5g10820 PE=2 SV=1	S	Function unknown	unnamed protein product [Prunus armeniaca]
PaF106G0700028233.01	2118	1991	2546	1006	856	1086	32.8413	35.8862	41.9794	16.6848	15.0115	16.2931	9.18958e-21	-1.06566	down	[O]	Posttranslational modification, protein turnover, chaperones	Molecular Function: ATP binding (GO:0005524);; Molecular Function: ATPase activity (GO:0016887);;	K09013|4.5e-189|pmum:103331015|K09013 Fe-S cluster assembly ATP-binding protein | (RefSeq) ABC transporter I family member 6, chloroplastic	--	--	--	ABC transporter	ABC transporter I family member 6, chloroplastic OS=Arabidopsis thaliana OX=3702 GN=ABCI6 PE=1 SV=1	L	Replication, recombination and repair	PREDICTED: ABC transporter I family member 6, chloroplastic [Prunus mume]
PaF106G0700027524.01	2553	2291	2354	5684	4752	7509	35.4779	37.4183	32.785	85.1824	76.9135	103.929	2.76664e-40	1.36252	up	[QV]	Secondary metabolites biosynthesis, transport and catabolism;; Defense mechanisms	Molecular Function: monooxygenase activity (GO:0004497);; Molecular Function: iron ion binding (GO:0005506);; Cellular Component: integral component of membrane (GO:0016021);; Molecular Function: oxidoreductase activity, acting on paired donors, with incorporation or reduction of molecular oxygen (GO:0016705);; Molecular Function: heme binding (GO:0020037);;	K09843|1.4e-122|pmum:107881722|K09843 (+)-abscisic acid 8'-hydroxylase [EC:1.14.14.137] | (RefSeq) abscisic acid 8'-hydroxylase 4-like	Carotenoid biosynthesis (ko00906)	[QI]	Secondary metabolites biosynthesis, transport and catabolism;; Lipid transport and metabolism	Cytochrome P450	Abscisic acid 8'-hydroxylase 4 OS=Arabidopsis thaliana OX=3702 GN=CYP707A4 PE=2 SV=2	--	--	unnamed protein product [Prunus armeniaca]
PaF106G0400015192.01	269	310	206	26	51	48	3.61045	4.97392	2.85013	0.37295	0.789615	0.643816	7.91039e-17	-2.19949	down	[I]	Lipid transport and metabolism	Molecular Function: phospholipase activity (GO:0004620);; Biological Process: lipid metabolic process (GO:0006629);;	K16818|7.2e-74|atr:18428292|K16818 phospholipase A1 [EC:3.1.1.32] | (RefSeq) phospholipase A(1) DAD1, chloroplastic	Glycerophospholipid metabolism (ko00564);; alpha-Linolenic acid metabolism (ko00592)	[I]	Lipid transport and metabolism	Lipase (class 3)	Phospholipase A1-Igamma3, chloroplastic OS=Arabidopsis thaliana OX=3702 GN=At1g51440 PE=1 SV=1	I	Lipid transport and metabolism	unnamed protein product [Prunus armeniaca]
PaF106G0200010348.01	1677	1598	2057	702	809	802	47.3047	53.9569	59.8711	21.5478	26.6161	22.6509	6.26723e-17	-1.08091	down	[J]	Translation, ribosomal structure and biogenesis	Molecular Function: RNA binding (GO:0003723);; Molecular Function: structural constituent of ribosome (GO:0003735);; Biological Process: translation (GO:0006412);; Cellular Component: small ribosomal subunit (GO:0015935);; Cellular Component: cytosolic small ribosomal subunit (GO:0022627);;	K02969|1.9e-29|cic:CICLE_v10006225mg|K02969 small subunit ribosomal protein S20e | (RefSeq) hypothetical protein	Ribosome (ko03010)	[J]	Translation, ribosomal structure and biogenesis	Ribosomal protein S10p/S20e	40S ribosomal protein S20-1 OS=Arabidopsis thaliana OX=3702 GN=RPS20A PE=2 SV=2	J	Translation, ribosomal structure and biogenesis	PREDICTED: 40S ribosomal protein S20-2 [Theobroma cacao]
PaF106G0400018149.01	67	97	99	16	18	23	0.747355	1.29181	1.18055	0.184689	0.224427	0.253001	3.8785e-07	-1.64404	down	[V]	Defense mechanisms	Molecular Function: antiporter activity (GO:0015297);; Cellular Component: membrane (GO:0016020);; Cellular Component: integral component of membrane (GO:0016021);; Molecular Function: transmembrane transporter activity (GO:0022857);; Molecular Function: xenobiotic transporter activity (GO:0042910);;	K03327|1.0e-152|pmum:103324527|K03327 multidrug resistance protein, MATE family | (RefSeq) protein DETOXIFICATION 40-like	--	[R]	General function prediction only	MatE	Protein DETOXIFICATION 40 OS=Arabidopsis thaliana OX=3702 GN=DTX40 PE=1 SV=1	V	Defense mechanisms	PREDICTED: protein DETOXIFICATION 40-like [Prunus mume]
PaF106G0100000801.01	1242	938	750	3038	2882	4384	22.3366	20.18	13.9124	59.471	60.4912	78.935	1.95581e-36	1.8171	up	[G]	Carbohydrate transport and metabolism	Molecular Function: hydrolase activity, hydrolyzing O-glycosyl compounds (GO:0004553);; Cellular Component: cell wall (GO:0005618);; Biological Process: xyloglucan metabolic process (GO:0010411);; Molecular Function: xyloglucan:xyloglucosyl transferase activity (GO:0016762);; Biological Process: cell wall biogenesis (GO:0042546);; Cellular Component: apoplast (GO:0048046);; Biological Process: ce…	K14504|4.7e-160|pmum:103323608|K14504 xyloglucan:xyloglucosyl transferase TCH4 [EC:2.4.1.207] | (RefSeq) probable xyloglucan endotransglucosylase/hydrolase protein 23	Plant hormone signal transduction (ko04075)	--	--	Glycosyl hydrolases family 16	Probable xyloglucan endotransglucosylase/hydrolase protein 23 OS=Arabidopsis thaliana OX=3702 GN=XTH23 PE=2 SV=1	G	Carbohydrate transport and metabolism	PREDICTED: probable xyloglucan endotransglucosylase/hydrolase protein 23 [Prunus mume]
PaF106G0400018009.01	19	9	35	53	90	96	0.7561	0.395615	1.42008	2.30174	4.22195	3.85995	6.53226e-05	1.42517	up	[O]	Posttranslational modification, protein turnover, chaperones	Molecular Function: molecular_function (GO:0003674);; Molecular Function: protein disulfide isomerase activity (GO:0003756);; Molecular Function: catalytic activity (GO:0003824);; Molecular Function: thioredoxin-disulfide reductase activity (GO:0004791);; Cellular Component: cellular_component (GO:0005575);; Cellular Component: intracellular (GO:0005622);; Cellular Component: cell (GO:0005623);; …	K03671|2.0e-65|pmum:103324584|K03671 thioredoxin 1 | (RefSeq) thioredoxin-like protein CXXS1	--	[O]	Posttranslational modification, protein turnover, chaperones	Thioredoxin	Thioredoxin-like protein CXXS1 OS=Arabidopsis thaliana OX=3702 GN=CXXS1 PE=2 SV=2	O	Posttranslational modification, protein turnover, chaperones	unnamed protein product [Prunus armeniaca]
PaF106G0100001078.01	216	159	239	29	90	59	5.38154	4.73184	6.14032	0.766092	2.61169	1.4614	7.11392e-06	-1.36228	down	[S]	Function unknown	Cellular Component: extracellular region (GO:0005576);;	K13449|9.6e-40|bdi:100846532|K13449 pathogenesis-related protein 1 | (RefSeq) pathogenesis-related protein 1	MAPK signaling pathway - plant (ko04016);; Plant hormone signal transduction (ko04075);; Plant-pathogen interaction (ko04626)	[S]	Function unknown	Cysteine-rich secretory protein family	Pathogenesis-related protein PR-1 OS=Medicago truncatula OX=3880 GN=PR-1 PE=2 SV=1	S	Function unknown	unnamed protein product [Prunus armeniaca]
PaF106G0300013106.01	80	93	85	3	6	8	1.40552	1.95314	1.54856	0.056897	0.122221	0.13241	7.60259e-15	-2.64127	down	[K]	Transcription	Molecular Function: O-methyltransferase activity (GO:0008171);; Molecular Function: S-adenosylmethionine-dependent methyltransferase activity (GO:0008757);; Biological Process: aromatic compound biosynthetic process (GO:0019438);; Biological Process: methylation (GO:0032259);; Molecular Function: protein dimerization activity (GO:0046983);;	K16040|9.4e-127|qsu:112015373|K16040 trans-resveratrol di-O-methyltransferase [EC:2.1.1.240] | (RefSeq) trans-resveratrol di-O-methyltransferase-like	Stilbenoid, diarylheptanoid and gingerol biosynthesis (ko00945)	[R]	General function prediction only	O-methyltransferase domain	Trans-resveratrol di-O-methyltransferase OS=Vitis vinifera OX=29760 GN=ROMT PE=1 SV=2	S	Function unknown	unnamed protein product [Prunus armeniaca]
PaF106G0700027870.01	145	131	138	482	561	1001	1.73034	1.80765	1.68958	6.13969	7.6325	11.9036	1.02729e-27	2.17764	up	[G]	Carbohydrate transport and metabolism	Molecular Function: hydrolase activity, hydrolyzing O-glycosyl compounds (GO:0004553);; Biological Process: carbohydrate metabolic process (GO:0005975);;	K13031|1.2e-158|pper:18770931|K13031 amygdalin beta-glucosidase [EC:3.2.1.117] | (RefSeq) beta-glucosidase 12 isoform X1	Cyanoamino acid metabolism (ko00460)	[G]	Carbohydrate transport and metabolism	Glycosyl hydrolase family 1	Cyanogenic beta-glucosidase (Fragment) OS=Trifolium repens OX=3899 GN=LI PE=1 SV=1	G	Carbohydrate transport and metabolism	cyanogenic beta-glucosidase isoform X2 [Prunus persica]
PaF106G0100006531.01	48	37	51	127	196	154	0.946373	0.88303	1.04499	2.73203	4.58684	3.08543	9.32871e-10	1.63874	up	[G]	Carbohydrate transport and metabolism	Molecular Function: pectate lyase activity (GO:0030570);; Biological Process: pectin catabolic process (GO:0045490);; Molecular Function: metal ion binding (GO:0046872);;	K01728|3.5e-227|pavi:110764871|K01728 pectate lyase [EC:4.2.2.2] | (RefSeq) probable pectate lyase 4	Pentose and glucuronate interconversions (ko00040)	--	--	Pectate lyase	Putative pectate lyase 2 OS=Arabidopsis thaliana OX=3702 GN=At1g11920 PE=3 SV=2	G	Carbohydrate transport and metabolism	unnamed protein product [Prunus armeniaca]
PaF106G0500019108.01	76	83	67	0	2	0	0.378023	0.498157	0.343981	0	0.01147	0	9.67554e-19	-3.19563	down	[S]	Function unknown	Molecular Function: ATP binding (GO:0005524);;	K10875|3.5e-229|pmum:103329023|K10875 DNA repair and recombination protein RAD54 and RAD54-like protein [EC:3.6.4.-] | (RefSeq) SNF2 domain-containing protein CLASSY 4-like	Homologous recombination (ko03440)	[L]	Replication, recombination and repair	SNF2 family N-terminal domain	SNF2 domain-containing protein CLASSY 3 OS=Arabidopsis thaliana OX=3702 GN=CLSY3 PE=1 SV=1	L	Replication, recombination and repair	unnamed protein product [Prunus armeniaca]
PaF106G0800032614.01	819	749	783	1636	1461	2014	7.23802	7.92313	7.12803	15.7683	15.0917	17.8453	5.66097e-32	1.17651	up	[T]	Signal transduction mechanisms	Molecular Function: ATP binding (GO:0005524);; Cellular Component: integral component of membrane (GO:0016021);; Molecular Function: ATPase activity (GO:0016887);;	K05681|9.2e-81|nau:109228191|K05681 ATP-binding cassette, subfamily G (WHITE), member 2 | (RefSeq) ABC transporter G family member 9-like	ABC transporters (ko02010)	[Q]	Secondary metabolites biosynthesis, transport and catabolism	ABC transporter	ABC transporter G family member 22 OS=Arabidopsis thaliana OX=3702 GN=ABCG22 PE=1 SV=1	Q	Secondary metabolites biosynthesis, transport and catabolism	unnamed protein product [Prunus armeniaca]
PaF106G0100000835.01	38	28	24	61	120	125	0.961733	0.83389	0.622047	1.65523	3.53354	3.165	4.84403e-06	1.45574	up	[P]	Inorganic ion transport and metabolism	Molecular Function: calcium-transporting ATPase activity (GO:0005388);; Molecular Function: ATP binding (GO:0005524);; Cellular Component: integral component of membrane (GO:0016021);;	K01537|3.7e-98|pavi:110758353|K01537 P-type Ca2+ transporter type 2C [EC:7.2.2.10] | (RefSeq) calcium-transporting ATPase 8, plasma membrane-type-like isoform X1	--	[P]	Inorganic ion transport and metabolism	Cation transporting ATPase, C-terminus	Calcium-transporting ATPase 5, plasma membrane-type OS=Oryza sativa subsp. japonica OX=39947 GN=ACA5 PE=1 SV=2	P	Inorganic ion transport and metabolism	calcium-transporting ATPase 8, plasma membrane-type-like isoform X1 [Prunus avium]
PaF106G0800031809.01	411	312	387	52	45	93	7.85826	7.12844	7.62452	1.07616	0.982705	1.76329	2.61417e-26	-2.25143	down	[Q]	Secondary metabolites biosynthesis, transport and catabolism	Molecular Function: oxidoreductase activity (GO:0016491);; Molecular Function: metal ion binding (GO:0046872);;	K24028|1.3e-90|lja:Lj0g3v0213339.1|K24028 salicylic acid 3-hydroxylase [EC:1.14.11.-] | (RefSeq) Lj0g3v0213339.1; -	--	[QR]	Secondary metabolites biosynthesis, transport and catabolism;; General function prediction only	non-haem dioxygenase in morphine synthesis N-terminal	2-oxoglutarate-dependent dioxygenase 19 OS=Oryza sativa subsp. japonica OX=39947 GN=2ODD19 PE=1 SV=1	Q	Secondary metabolites biosynthesis, transport and catabolism	PREDICTED: protein DMR6-LIKE OXYGENASE 2-like [Prunus mume]
PaF106G0200008900.01	474	308	371	885	859	1091	5.61322	4.57175	4.42586	10.5914	10.6412	11.5485	1.08707e-25	1.34795	up	[IQR]	Lipid transport and metabolism;; Secondary metabolites biosynthesis, transport and catabolism;; General function prediction only	--	K15095|2.8e-166|pavi:110759311|K15095 (+)-neomenthol dehydrogenase [EC:1.1.1.208] | (RefSeq) uncharacterized protein LOC110759311	--	[Q]	Secondary metabolites biosynthesis, transport and catabolism	short chain dehydrogenase	(+)-neomenthol dehydrogenase OS=Arabidopsis thaliana OX=3702 GN=SDR1 PE=1 SV=1	Q	Secondary metabolites biosynthesis, transport and catabolism	uncharacterized protein LOC110759311 [Prunus avium]
PaF106G0100006288.01	154	160	156	51	35	63	5.78181	7.18024	6.03644	2.08432	1.52489	2.36054	5.82955e-08	-1.38729	down	[J]	Translation, ribosomal structure and biogenesis	Biological Process: ribosomal small subunit assembly (GO:0000028);; Molecular Function: structural constituent of ribosome (GO:0003735);; Biological Process: translation (GO:0006412);; Cellular Component: cytosolic small ribosomal subunit (GO:0022627);; Biological Process: maturation of SSU-rRNA (GO:0030490);;	K02979|2.8e-28|pper:109946546|K02979 small subunit ribosomal protein S28e | (RefSeq) 40S ribosomal protein S28-like	Ribosome (ko03010)	[J]	Translation, ribosomal structure and biogenesis	Ribosomal protein S28e	40S ribosomal protein S28 OS=Zea mays OX=4577 GN=RPS28 PE=3 SV=1	J	Translation, ribosomal structure and biogenesis	40S ribosomal protein S28-like [Prunus persica]
PaF106G0300012396.01	196	171	148	901	660	806	2.65367	2.7652	2.05986	13.2655	10.4238	10.9158	9.14072e-42	2.17508	up	[QV]	Secondary metabolites biosynthesis, transport and catabolism;; Defense mechanisms	Molecular Function: iron ion binding (GO:0005506);; Cellular Component: membrane (GO:0016020);; Molecular Function: oxidoreductase activity, acting on paired donors, with incorporation or reduction of molecular oxygen, NAD(P)H as one donor, and incorporation of one atom of oxygen (GO:0016709);; Molecular Function: heme binding (GO:0020037);;	K00495|1.8e-239|pmum:103337951|K00495 phenylacetaldehyde oxime monooxygenase [EC:1.14.14.44] | (RefSeq) cytochrome P450 71A1-like	Cyanoamino acid metabolism (ko00460)	[Q]	Secondary metabolites biosynthesis, transport and catabolism	Cytochrome P450	Phenylacetaldehyde oxime monooxygenase CYP71AN24 OS=Prunus mume OX=102107 GN=CYP71AN24 PE=1 SV=1	Q	Secondary metabolites biosynthesis, transport and catabolism	PREDICTED: cytochrome P450 71A1-like [Prunus mume]
PaF106G0400015353.01	33	14	14	60	52	51	0.641892	0.318905	0.282703	1.29164	1.19941	1.00896	0.00248468	1.09634	up	[P]	Inorganic ion transport and metabolism	Cellular Component: integral component of membrane (GO:0016021);; Molecular Function: metal ion transmembrane transporter activity (GO:0046873);;	K14709|1.3e-169|pmum:103342750|K14709 solute carrier family 39 (zinc transporter), member 1/2/3 | (RefSeq) zinc transporter 11-like	--	[P]	Inorganic ion transport and metabolism	ZIP Zinc transporter	Zinc transporter 11 OS=Arabidopsis thaliana OX=3702 GN=ZIP11 PE=2 SV=1	P	Inorganic ion transport and metabolism	PREDICTED: zinc transporter 11-like [Prunus mume]
PaF106G0600025168.01	195	149	156	63	78	74	2.43356	2.2121	2.00465	0.854096	1.12314	0.924105	2.27154e-05	-1.00584	down	[E]	Amino acid transport and metabolism	Molecular Function: transaminase activity (GO:0008483);; Cellular Component: integral component of membrane (GO:0016021);;	K22207|1.2e-272|pavi:110770561|K22207 L-cysteine desulfhydrase [EC:4.4.1.28] | (RefSeq) probable L-cysteine desulfhydrase, chloroplastic	Cysteine and methionine metabolism (ko00270)	[E]	Amino acid transport and metabolism	Aminotransferase class-V	Probable L-cysteine desulfhydrase, chloroplastic OS=Arabidopsis thaliana OX=3702 GN=CpNIFS3 PE=1 SV=1	E	Amino acid transport and metabolism	unnamed protein product [Prunus armeniaca]
PaF106G0500021088.01	883	634	729	218	270	375	11.3013	9.69966	9.62135	3.03339	4.03279	4.80633	1.33889e-14	-1.23593	down	[QV]	Secondary metabolites biosynthesis, transport and catabolism;; Defense mechanisms	Molecular Function: monooxygenase activity (GO:0004497);; Molecular Function: iron ion binding (GO:0005506);; Molecular Function: oxidoreductase activity, acting on paired donors, with incorporation or reduction of molecular oxygen (GO:0016705);; Molecular Function: heme binding (GO:0020037);;	K20562|5.4e-167|thj:104815260|K20562 biphenyl-4-hydroxylase | (RefSeq) cytochrome P450 CYP736A12-like	--	[Q]	Secondary metabolites biosynthesis, transport and catabolism	Cytochrome P450	Cytochrome P450 CYP736A12 OS=Panax ginseng OX=4054 PE=2 SV=1	Q	Secondary metabolites biosynthesis, transport and catabolism	PREDICTED: cytochrome P450 CYP736A12-like [Prunus mume]
PaF106G0200008738.01	554	547	585	206	233	296	9.40039	11.1076	10.2425	3.79579	4.61734	5.01889	2.48534e-12	-1.07354	down	[T]	Signal transduction mechanisms	Biological Process: microtubule cytoskeleton organization (GO:0000226);; Biological Process: mitotic cell cycle (GO:0000278);; Cellular Component: chromosome, centromeric region (GO:0000775);; Molecular Function: ATP binding (GO:0005524);; Cellular Component: nucleus (GO:0005634);; Cellular Component: spindle (GO:0005819);; Biological Process: chromosome segregation (GO:0007059);; Biological Proc…	K08850|1.2e-157|pavi:110766848|K08850 aurora kinase, other [EC:2.7.11.1] | (RefSeq) serine/threonine-protein kinase Aurora-3	--	[D]	Cell cycle control, cell division, chromosome partitioning	Protein kinase domain	Serine/threonine-protein kinase Aurora-3 OS=Arabidopsis thaliana OX=3702 GN=AUR3 PE=2 SV=1	T	Signal transduction mechanisms	unnamed protein product [Prunus armeniaca]
PaF106G0100005028.01	74	66	68	25	19	36	1.67131	1.79261	1.57811	0.614598	0.485161	0.800118	0.00161585	-1.03016	down	[T]	Signal transduction mechanisms	--	--	--	--	--	Carbohydrate esterase, sialic acid-specific acetylesterase	Probable carbohydrate esterase At4g34215 OS=Arabidopsis thaliana OX=3702 GN=At4g34215 PE=1 SV=2	S	Function unknown	unnamed protein product [Prunus armeniaca]
PaF106G0200007295.01	420	450	345	110	70	133	2.31896	2.97035	1.96081	0.657583	0.448832	0.731347	4.44462e-16	-1.72782	down	[R]	General function prediction only	Molecular Function: ADP binding (GO:0043531);;	K12818|4.8e-193|mtr:MTR_0267s0070|K12818 ATP-dependent RNA helicase DHX8/PRP22 [EC:3.6.4.13] | (RefSeq) NB-ARC domain disease resistance protein, putative	Spliceosome (ko03040)	[T]	Signal transduction mechanisms	NB-ARC domain	Putative disease resistance RPP13-like protein 1 OS=Arabidopsis thaliana OX=3702 GN=RPPL1 PE=3 SV=1	T	Signal transduction mechanisms	putative disease resistance RPP13-like protein 1 [Prunus persica]
PaF106G0100001087.01	77	35	76	241	196	229	0.883332	0.475957	0.898307	3.02561	2.63444	2.64359	7.01398e-12	1.69848	up	[IR]	Lipid transport and metabolism;; General function prediction only	Molecular Function: oxidoreductase activity, acting on CH-OH group of donors (GO:0016614);; Molecular Function: lyase activity (GO:0016829);; Molecular Function: flavin adenine dinucleotide binding (GO:0050660);;	K08248|0.0e+00|pmum:103323461|K08248 (R)-mandelonitrile lyase [EC:4.1.2.10] | (RefSeq) (R)-mandelonitrile lyase 2-like	Cyanoamino acid metabolism (ko00460)	[R]	General function prediction only	GMC oxidoreductase	(R)-mandelonitrile lyase 2 OS=Prunus serotina OX=23207 GN=MDL2 PE=2 SV=1	E	Amino acid transport and metabolism	PREDICTED: (R)-mandelonitrile lyase 2-like [Prunus mume]
PaF106G0800032319.01	91	89	78	534	506	605	0.49561	0.583699	0.442294	3.19119	3.2436	3.32777	1.44889e-58	2.61374	up	[R]	General function prediction only	Biological Process: signal transduction (GO:0007165);; Molecular Function: ADP binding (GO:0043531);;	K00695|5.7e-130|mtr:MTR_6g478030|K00695 sucrose synthase [EC:2.4.1.13] | (RefSeq) sucrose synthase	Starch and sucrose metabolism (ko00500)	--	--	TIR domain	TMV resistance protein N OS=Nicotiana glutinosa OX=35889 GN=N PE=1 SV=1	S	Function unknown	PREDICTED: TMV resistance protein N-like [Prunus mume]
PaF106G0200008745.01	2567	1597	1884	178	222	253	31.3637	23.3459	23.7343	2.35479	3.16142	3.08505	1.23331e-98	-2.99056	down	[QV]	Secondary metabolites biosynthesis, transport and catabolism;; Defense mechanisms	Molecular Function: iron ion binding (GO:0005506);; Cellular Component: integral component of membrane (GO:0016021);; Molecular Function: oxidoreductase activity, acting on paired donors, with incorporation or reduction of molecular oxygen (GO:0016705);; Molecular Function: heme binding (GO:0020037);;	K20495|2.5e-116|ppp:112291140|K20495 long-chain fatty acid omega-monooxygenase [EC:1.14.14.80] | (RefSeq) cytochrome P450 704B1-like	Fatty acid degradation (ko00071);; Cutin, suberine and wax biosynthesis (ko00073)	[QI]	Secondary metabolites biosynthesis, transport and catabolism;; Lipid transport and metabolism	Cytochrome P450	Cytochrome P450 704C1 OS=Pinus taeda OX=3352 GN=CYP704C1 PE=2 SV=1	--	--	PREDICTED: cytochrome P450 704C1-like [Prunus mume]
PaF106G0800031024.01	61	55	67	163	132	213	0.874165	0.945473	0.988579	2.54828	2.20572	3.05951	7.7817e-09	1.37866	up	[G]	Carbohydrate transport and metabolism	Molecular Function: UDP-glycosyltransferase activity (GO:0008194);;	K14595|1.0e-271|pper:18766834|K14595 abscisate beta-glucosyltransferase [EC:2.4.1.263] | (RefSeq) abscisate beta-glucosyltransferase	Carotenoid biosynthesis (ko00906)	[GC]	Carbohydrate transport and metabolism;; Energy production and conversion	UDP-glucoronosyl and UDP-glucosyl transferase	Abscisate beta-glucosyltransferase OS=Phaseolus angularis OX=3914 GN=AOG PE=1 SV=1	--	--	unnamed protein product [Prunus armeniaca]
PaF106G0100006489.01	388	306	373	1093	1011	1349	2.87558	1.79957	2.94073	10.049	9.78234	11.2001	4.97493e-54	1.73657	up	[R]	General function prediction only	Biological Process: signal transduction (GO:0007165);; Molecular Function: ADP binding (GO:0043531);;	K00695|1.1e-135|mtr:MTR_6g478030|K00695 sucrose synthase [EC:2.4.1.13] | (RefSeq) sucrose synthase	Starch and sucrose metabolism (ko00500)	--	--	TIR domain	TMV resistance protein N OS=Nicotiana glutinosa OX=35889 GN=N PE=1 SV=1	T	Signal transduction mechanisms	TMV resistance protein N isoform X1 [Prunus persica]
PaF106G0200010198.01	643	626	655	315	223	317	13.9507	16.2808	14.6762	7.41374	5.63169	6.903	8.4428e-12	-1.04501	down	[P]	Inorganic ion transport and metabolism	Molecular Function: superoxide dismutase activity (GO:0004784);; Cellular Component: chloroplast nucleoid (GO:0042644);; Molecular Function: metal ion binding (GO:0046872);;	K04564|4.4e-175|pmum:103333005|K04564 superoxide dismutase, Fe-Mn family [EC:1.15.1.1] | (RefSeq) superoxide dismutase [Fe], chloroplastic isoform X1	Peroxisome (ko04146)	[P]	Inorganic ion transport and metabolism	Iron/manganese superoxide dismutases, C-terminal domain	Superoxide dismutase [Fe] 2, chloroplastic OS=Arabidopsis thaliana OX=3702 GN=FSD2 PE=1 SV=1	P	Inorganic ion transport and metabolism	PREDICTED: superoxide dismutase [Fe], chloroplastic isoform X1 [Prunus mume]
PaF106G0500020036.01	561	417	534	1363	1112	1246	6.93103	6.16411	6.80509	18.3512	16.055	15.4307	3.08009e-27	1.35613	up	[E]	Amino acid transport and metabolism	Cellular Component: cytoplasm (GO:0005737);; Molecular Function: carbon-sulfur lyase activity (GO:0016846);; Biological Process: transsulfuration (GO:0019346);; Molecular Function: pyridoxal phosphate binding (GO:0030170);;	K01761|4.5e-245|pmum:103337840|K01761 methionine-gamma-lyase [EC:4.4.1.11] | (RefSeq) methionine gamma-lyase	Cysteine and methionine metabolism (ko00270);; Selenocompound metabolism (ko00450)	[E]	Amino acid transport and metabolism	Cys/Met metabolism PLP-dependent enzyme	Methionine gamma-lyase OS=Arabidopsis thaliana OX=3702 GN=MGL PE=1 SV=1	E	Amino acid transport and metabolism	unnamed protein product [Prunus armeniaca]
PaF106G0500018747.01	747	648	714	160	213	236	12.8016	13.2785	12.6211	2.98418	4.26171	4.03844	1.0006e-27	-1.63443	down	[R]	General function prediction only	--	K21568|1.3e-168|pmum:103336796|K21568 pinoresinol/lariciresinol reductase [EC:1.23.1.1 1.23.1.2 1.23.1.3 1.23.1.4] | (RefSeq) isoflavone reductase homolog	Biosynthesis of various secondary metabolites - part 2 (ko00998)	--	--	NmrA-like family	Isoflavone reductase homolog OS=Lupinus albus OX=3870 PE=2 SV=1	S	Function unknown	PREDICTED: isoflavone reductase homolog [Prunus mume]
PaF106G0600025165.01	135	134	150	53	45	48	1.69358	2.05718	2.04003	0.723172	0.6945	0.619265	9.78465e-07	-1.25391	down	[E]	Amino acid transport and metabolism	Molecular Function: catalytic activity (GO:0003824);;	K22207|1.0e-268|pmum:103344505|K22207 L-cysteine desulfhydrase [EC:4.4.1.28] | (RefSeq) probable L-cysteine desulfhydrase, chloroplastic isoform X1	Cysteine and methionine metabolism (ko00270)	[E]	Amino acid transport and metabolism	Aminotransferase class-V	Probable L-cysteine desulfhydrase, chloroplastic OS=Arabidopsis thaliana OX=3702 GN=CpNIFS3 PE=1 SV=1	E	Amino acid transport and metabolism	unnamed protein product [Prunus armeniaca]
PaF106G0300014540.01	7803	5117	7473	2156	1890	2415	75.9392	59.7633	75.826	23.5701	21.6993	23.1777	5.36709e-47	-1.52917	down	[I]	Lipid transport and metabolism	Molecular Function: catalytic activity (GO:0003824);;	K01897|1.6e-285|pmum:103327297|K01897 long-chain acyl-CoA synthetase [EC:6.2.1.3] | (RefSeq) long chain acyl-CoA synthetase 1	Fatty acid biosynthesis (ko00061);; Fatty acid degradation (ko00071);; Fatty acid metabolism (ko01212);; Peroxisome (ko04146)	[I]	Lipid transport and metabolism	AMP-binding enzyme	Long chain acyl-CoA synthetase 1 OS=Arabidopsis thaliana OX=3702 GN=LACS1 PE=2 SV=1	I	Lipid transport and metabolism	long-chain acyl-CoA synthetase 1 [Prunus sibirica]
PaF106G0100002926.01	1878	2155	1940	393	254	351	31.6477	43.4505	33.7233	7.20445	4.97754	5.91575	5.71677e-56	-2.39513	down	[O]	Posttranslational modification, protein turnover, chaperones	Molecular Function: cysteine-type endopeptidase activity (GO:0004197);; Cellular Component: extracellular space (GO:0005615);; Cellular Component: lysosome (GO:0005764);; Biological Process: proteolysis involved in cellular protein catabolic process (GO:0051603);;	K16292|6.5e-207|pmum:103321873|K16292 KDEL-tailed cysteine endopeptidase [EC:3.4.22.-] | (RefSeq) vignain-like	--	[O]	Posttranslational modification, protein turnover, chaperones	Papain family cysteine protease	Vignain OS=Ricinus communis OX=3988 GN=CYSEP PE=1 SV=1	O	Posttranslational modification, protein turnover, chaperones	PREDICTED: vignain-like [Prunus mume]
PaF106G0100003994.01	111	162	112	344	281	266	1.76238	3.07769	1.83517	5.97234	5.22395	4.24492	1.37439e-06	1.15301	up	[T]	Signal transduction mechanisms	Molecular Function: acid phosphatase activity (GO:0003993);; Molecular Function: ferrous iron binding (GO:0008198);; Molecular Function: ferric iron binding (GO:0008199);;	K14379|8.0e-199|pmum:103320985|K14379 tartrate-resistant acid phosphatase type 5 [EC:3.1.3.2] | (RefSeq) purple acid phosphatase 17-like	Riboflavin metabolism (ko00740)	[O]	Posttranslational modification, protein turnover, chaperones	Calcineurin-like phosphoesterase	Purple acid phosphatase 17 OS=Arabidopsis thaliana OX=3702 GN=PAP17 PE=2 SV=1	O	Posttranslational modification, protein turnover, chaperones	unnamed protein product [Prunus armeniaca]
PaF106G0400017564.01	46	32	44	119	165	155	0.93516	0.77553	0.93551	2.99071	3.97477	3.20523	1.75842e-10	1.6765	up	[R]	General function prediction only	Biological Process: mitochondrial respiratory chain complex I assembly (GO:0032981);;	K03070|1.9e-48|pmum:103319773|K03070 preprotein translocase subunit SecA [EC:7.4.2.8] | (RefSeq) protein translocase subunit SECA2, chloroplastic	Protein export (ko03060)	[G]	Carbohydrate transport and metabolism	Complex I intermediate-associated protein 30 (CIA30)	Protein translocase subunit SECA2, chloroplastic OS=Arabidopsis thaliana OX=3702 GN=SECA2 PE=1 SV=1	G	Carbohydrate transport and metabolism	unnamed protein product [Prunus armeniaca]
PaF106G0800031398.01	653	586	710	243	261	330	13.4809	14.6431	15.16	4.88073	5.56742	6.36728	5.45203e-15	-1.10179	down	[J]	Translation, ribosomal structure and biogenesis	Molecular Function: structural constituent of ribosome (GO:0003735);; Biological Process: translation (GO:0006412);; Cellular Component: large ribosomal subunit (GO:0015934);;	K02876|5.3e-54|pmum:103335627|K02876 large subunit ribosomal protein L15 | (RefSeq) 50S ribosomal protein L15-like	Ribosome (ko03010)	[J]	Translation, ribosomal structure and biogenesis	--	--	J	Translation, ribosomal structure and biogenesis	unnamed protein product [Prunus armeniaca]
PaF106G0100001881.01	263	214	233	474	371	575	2.54312	2.48069	2.32361	5.03867	4.22147	5.61637	8.77058e-11	1.03026	up	[T]	Signal transduction mechanisms	Molecular Function: ion channel activity (GO:0005216);; Cellular Component: integral component of membrane (GO:0016021);;	K05391|1.9e-301|pmum:103327048|K05391 cyclic nucleotide gated channel, plant | (RefSeq) cyclic nucleotide-gated ion channel 1-like	Plant-pathogen interaction (ko04626)	[PT]	Inorganic ion transport and metabolism;; Signal transduction mechanisms	Ion transport protein	Cyclic nucleotide-gated ion channel 1 OS=Arabidopsis thaliana OX=3702 GN=CNGC1 PE=1 SV=1	--	--	unnamed protein product [Prunus armeniaca]
PaF106G0100002088.01	488	256	245	118	138	157	5.43571	3.41162	2.81476	1.42582	1.79016	1.74464	1.32559e-05	-1.03505	down	[GI]	Carbohydrate transport and metabolism;; Lipid transport and metabolism	Molecular Function: pectinesterase activity (GO:0030599);; Biological Process: cell wall modification (GO:0042545);; Molecular Function: aspartyl esterase activity (GO:0045330);; Biological Process: pectin catabolic process (GO:0045490);; Molecular Function: pectinesterase inhibitor activity (GO:0046910);;	K01051|5.0e-132|hbr:110663013|K01051 pectinesterase [EC:3.1.1.11] | (RefSeq) pectinesterase 2-like isoform X1	Pentose and glucuronate interconversions (ko00040)	--	--	Pectinesterase	Probable pectinesterase/pectinesterase inhibitor 35 OS=Arabidopsis thaliana OX=3702 GN=PME35 PE=2 SV=1	T	Signal transduction mechanisms	unnamed protein product [Prunus armeniaca]
PaF106G0400018270.01	62	48	48	6	0	5	0.508488	0.470264	0.40544	0.048378	0	0.03624	1.73476e-08	-2.11626	down	[O]	Posttranslational modification, protein turnover, chaperones	Molecular Function: serine-type endopeptidase activity (GO:0004252);;	K15333|1.4e-177|nsy:104224633|K15333 tRNA guanosine-2'-O-methyltransferase [EC:2.1.1.34] | (RefSeq) uncharacterized protein LOC104224633	--	--	--	Subtilase family	Subtilisin-like protease SBT2.4 OS=Arabidopsis thaliana OX=3702 GN=SBT2.4 PE=1 SV=1	O	Posttranslational modification, protein turnover, chaperones	PREDICTED: subtilisin-like protease SBT2.4 [Prunus mume]
PaF106G0400014719.01	144	134	164	775	631	817	0.697552	0.779283	0.819279	4.1025	3.5824	3.98012	2.89106e-56	2.31411	up	[R]	General function prediction only	Biological Process: signal transduction (GO:0007165);; Molecular Function: ADP binding (GO:0043531);;	K00695|2.7e-157|mtr:MTR_6g478030|K00695 sucrose synthase [EC:2.4.1.13] | (RefSeq) sucrose synthase	Starch and sucrose metabolism (ko00500)	--	--	TIR domain	Disease resistance protein Roq1 OS=Nicotiana benthamiana OX=4100 GN=ROQ1 PE=1 SV=1	--	--	PREDICTED: disease resistance protein TAO1-like [Prunus mume]
PaF106G0700027938.01	2099	2073	2465	891	684	1094	26.9796	31.8901	32.6895	12.4583	10.2542	14.0765	5.03023e-21	-1.20556	down	[R]	General function prediction only	Cellular Component: endoplasmic reticulum (GO:0005783);; Biological Process: auxin metabolic process (GO:0009850);; Molecular Function: IAA-Ala conjugate hydrolase activity (GO:0010179);; Molecular Function: hydrolase activity (GO:0016787);;	K14664|1.7e-246|pmum:103341727|K14664 IAA-amino acid hydrolase [EC:3.5.1.-] | (RefSeq) IAA-amino acid hydrolase ILR1-like	--	--	--	Peptidase family M20/M25/M40	IAA-amino acid hydrolase ILR1 OS=Arabidopsis thaliana OX=3702 GN=ILR1 PE=1 SV=2	S	Function unknown	PREDICTED: IAA-amino acid hydrolase ILR1-like [Prunus mume]
PaF106G0400017695.01	8202	4183	7979	1538	1593	2086	145.755	88.9537	146.266	29.7314	33.0268	37.1053	9.79292e-31	-1.77926	down	[IR]	Lipid transport and metabolism;; General function prediction only	Molecular Function: hydrolase activity, acting on ester bonds (GO:0016788);;	K10691|1.5e-65|ats:109762802|K10691 E3 ubiquitin-protein ligase UBR4 [EC:2.3.2.27] | (RefSeq) LOC109762802; auxin transport protein BIG	--	--	--	GDSL-like Lipase/Acylhydrolase	GDSL esterase/lipase At5g45950 OS=Arabidopsis thaliana OX=3702 GN=At5g45950 PE=2 SV=1	I	Lipid transport and metabolism	PREDICTED: GDSL esterase/lipase At5g45950 [Prunus mume]
PaF106G0400017640.01	579	526	582	1681	1529	1731	6.66437	6.32641	6.32896	15.7934	15.4238	15.5377	1.05752e-56	1.60716	up	[O]	Posttranslational modification, protein turnover, chaperones	Molecular Function: cysteine-type endopeptidase activity (GO:0004197);; Cellular Component: extracellular space (GO:0005615);; Cellular Component: lysosome (GO:0005764);; Biological Process: proteolysis involved in cellular protein catabolic process (GO:0051603);;	K16292|6.0e-130|gmx:102666929|K16292 KDEL-tailed cysteine endopeptidase [EC:3.4.22.-] | (RefSeq) senescence-specific cysteine protease SAG39	--	[O]	Posttranslational modification, protein turnover, chaperones	Papain family cysteine protease	Senescence-specific cysteine protease SAG39 OS=Oryza sativa subsp. indica OX=39946 GN=OsI_14861 PE=3 SV=1	O	Posttranslational modification, protein turnover, chaperones	Maternal effect embryo arrest 18 [Theobroma cacao]
PaF106G0600023074.01	58	49	91	191	351	309	1.35518	1.37617	2.21244	4.89106	9.65912	7.28646	5.66289e-13	1.89138	up	[IQR]	Lipid transport and metabolism;; Secondary metabolites biosynthesis, transport and catabolism;; General function prediction only	Molecular Function: oxidoreductase activity (GO:0016491);;	K13070|1.4e-76|dosa:Os04t0179200-01|K13070 momilactone-A synthase [EC:1.1.1.295] | (RefSeq) Os04g0179200, MAS, MOMILACTONE_A_SYNTHASE; Similar to Stem secoisolariciresinol dehydrogenase (Fragment).	Diterpenoid biosynthesis (ko00904)	[R]	General function prediction only	Enoyl-(Acyl carrier protein) reductase	Secoisolariciresinol dehydrogenase (Fragment) OS=Forsythia intermedia OX=55183 PE=1 SV=1	Q	Secondary metabolites biosynthesis, transport and catabolism	unnamed protein product [Prunus armeniaca]
PaF106G0600023307.01	106	66	61	251	237	198	1.85382	1.40679	1.05475	4.75488	4.75895	3.44064	1.30463e-09	1.4794	up	[I]	Lipid transport and metabolism	Molecular Function: 3-hydroxyisobutyryl-CoA hydrolase activity (GO:0003860);; Biological Process: valine catabolic process (GO:0006574);;	K05605|1.8e-83|pper:18781659|K05605 3-hydroxyisobutyryl-CoA hydrolase [EC:3.1.2.4] | (RefSeq) 3-hydroxyisobutyryl-CoA hydrolase-like protein 5 isoform X1	Valine, leucine and isoleucine degradation (ko00280);; beta-Alanine metabolism (ko00410);; Propanoate metabolism (ko00640);; Carbon metabolism (ko01200)	--	--	Enoyl-CoA hydratase/isomerase	3-hydroxyisobutyryl-CoA hydrolase-like protein 5 OS=Arabidopsis thaliana OX=3702 GN=At1g06550 PE=1 SV=2	I	Lipid transport and metabolism	unnamed protein product [Prunus armeniaca]
PaF106G0800031033.01	180	109	155	35	46	49	2.29998	1.68713	2.03547	0.487812	0.681455	0.656223	4.94498e-08	-1.44204	down	[Q]	Secondary metabolites biosynthesis, transport and catabolism	Molecular Function: diacylglycerol O-acyltransferase activity (GO:0004144);; Cellular Component: integral component of membrane (GO:0016021);; Biological Process: glycerolipid biosynthetic process (GO:0045017);;	K15406|5.4e-55|bna:106451554|K15406 wax-ester synthase / diacylglycerol O-acyltransferase [EC:2.3.1.75 2.3.1.20] | (RefSeq) O-acyltransferase WSD1	Cutin, suberine and wax biosynthesis (ko00073)	--	--	WS/DGAT C-terminal domain	O-acyltransferase WSD1 OS=Arabidopsis thaliana OX=3702 GN=WSD1 PE=2 SV=1	S	Function unknown	PREDICTED: O-acyltransferase WSD1-like [Prunus mume]
PaF106G0700026580.01	765	766	715	1787	2335	2943	13.4736	16.171	13.1714	36.1024	48.0676	52.6746	5.88663e-34	1.66434	up	[R]	General function prediction only	Molecular Function: O-methyltransferase activity (GO:0008171);; Biological Process: methylation (GO:0032259);;	K00588|2.2e-134|pmum:103340769|K00588 caffeoyl-CoA O-methyltransferase [EC:2.1.1.104] | (RefSeq) probable caffeoyl-CoA O-methyltransferase At4g26220	Phenylpropanoid biosynthesis (ko00940);; Flavonoid biosynthesis (ko00941);; Stilbenoid, diarylheptanoid and gingerol biosynthesis (ko00945)	[Q]	Secondary metabolites biosynthesis, transport and catabolism	O-methyltransferase	Probable caffeoyl-CoA O-methyltransferase At4g26220 OS=Arabidopsis thaliana OX=3702 GN=At4g26220 PE=2 SV=1	Q	Secondary metabolites biosynthesis, transport and catabolism	unnamed protein product [Prunus armeniaca]
PaF106G0100000111.01	115	84	113	14	19	16	3.49565	3.03472	3.55125	0.437239	0.648825	0.4624	1.9015e-11	-2.04021	down	[G]	Carbohydrate transport and metabolism	Molecular Function: molecular_function (GO:0003674);; Cellular Component: cellular_component (GO:0005575);; Cellular Component: intracellular (GO:0005622);; Cellular Component: cell (GO:0005623);; Cellular Component: nucleus (GO:0005634);; Biological Process: carbohydrate metabolic process (GO:0005975);; Biological Process: cellular protein modification process (GO:0006464);; Biological Process: …	K12160|2.1e-38|pmum:103324257|K12160 small ubiquitin-related modifier | (RefSeq) small ubiquitin-related modifier 1-like	RNA transport (ko03013)	[O]	Posttranslational modification, protein turnover, chaperones	Ubiquitin-2 like Rad60 SUMO-like	Alpha-glucan phosphorylase, H isozyme OS=Vicia faba OX=3906 PE=2 SV=1	O	Posttranslational modification, protein turnover, chaperones	small ubiquitin-related modifier 1 [Prunus persica]
PaF106G0500018645.01	377	266	341	806	755	707	8.36293	7.06581	7.80273	19.5046	19.589	15.7257	5.69447e-17	1.25599	up	[G]	Carbohydrate transport and metabolism	Biological Process: carbohydrate metabolic process (GO:0005975);; Molecular Function: glycogen phosphorylase activity (GO:0008184);; Molecular Function: pyridoxal phosphate binding (GO:0030170);; Molecular Function: SHG alpha-glucan phosphorylase activity (GO:0102499);;	K00688|4.5e-61|pmum:103324815|K00688 glycogen phosphorylase [EC:2.4.1.1] | (RefSeq) glycogen phosphorylase 1-like isoform X1	Starch and sucrose metabolism (ko00500)	[G]	Carbohydrate transport and metabolism	Carbohydrate phosphorylase	Alpha-glucan phosphorylase, H isozyme OS=Vicia faba OX=3906 PE=2 SV=1	G	Carbohydrate transport and metabolism	PREDICTED: alpha-glucan phosphorylase, H isozyme-like [Prunus mume]
PaF106G0200007456.01	380	287	311	76	100	108	8.44924	7.62568	7.12408	1.82653	2.57991	2.39494	3.87542e-16	-1.57241	down	[M]	Cell wall/membrane/envelope biogenesis	Molecular Function: transferase activity (GO:0016740);;	--	--	--	--	--	Protein CDI OS=Arabidopsis thaliana OX=3702 GN=CDI PE=2 SV=1	--	--	unnamed protein product [Prunus armeniaca]
PaF106G0300014486.01	901	595	790	1212	1385	1955	14.0601	11.8365	12.8596	19.0131	25.4558	30.9571	1.53578e-13	1.03976	up	[R]	General function prediction only	Molecular Function: molecular_function (GO:0003674);; Molecular Function: catalytic activity (GO:0003824);; Biological Process: cellular aldehyde metabolic process (GO:0006081);; Biological Process: organic acid metabolic process (GO:0006082);; Biological Process: lactate metabolic process (GO:0006089);; Biological Process: biological_process (GO:0008150);; Biological Process: metabolic process (…	K18881|1.9e-127|pmum:103327333|K18881 D-lactate dehydratase [EC:4.2.1.130] | (RefSeq) protein DJ-1 homolog D-like	Pyruvate metabolism (ko00620)	[RV]	General function prediction only;; Defense mechanisms	DJ-1/PfpI family	Protein DJ-1 homolog D OS=Arabidopsis thaliana OX=3702 GN=DJ1D PE=1 SV=1	V	Defense mechanisms	PREDICTED: protein DJ-1 homolog D-like [Prunus mume]
PaF106G0100000452.01	374	304	366	76	69	142	7.11154	6.95765	7.19614	1.61448	1.5336	2.67528	2.54015e-14	-1.63701	down	[Q]	Secondary metabolites biosynthesis, transport and catabolism	Molecular Function: metal ion binding (GO:0046872);; Molecular Function: dioxygenase activity (GO:0051213);;	K13229|1.1e-81|ats:109766943|K13229 2,4-dihydroxy-1,4-benzoxazin-3-one-glucoside dioxygenase [EC:1.14.11.59] | (RefSeq) LOC109766943; DIBOA-glucoside dioxygenase BX6-like	Benzoxazinoid biosynthesis (ko00402)	[QR]	Secondary metabolites biosynthesis, transport and catabolism;; General function prediction only	2OG-Fe(II) oxygenase superfamily	1-aminocyclopropane-1-carboxylate oxidase homolog 1 OS=Arabidopsis thaliana OX=3702 GN=At1g06620 PE=2 SV=1	Q	Secondary metabolites biosynthesis, transport and catabolism	PREDICTED: 1-aminocyclopropane-1-carboxylate oxidase homolog 1-like [Prunus mume]
PaF106G0300011917.01	7	0	7	126	86	81	0.05193	0	0.057578	1.14351	0.836687	0.69534	7.29523e-17	2.90524	up	[T]	Signal transduction mechanisms	Molecular Function: protein serine/threonine kinase activity (GO:0004674);; Molecular Function: ATP binding (GO:0005524);; Cellular Component: plasma membrane (GO:0005886);; Biological Process: protein phosphorylation (GO:0006468);; Cellular Component: integral component of membrane (GO:0016021);; Biological Process: recognition of pollen (GO:0048544);;	K24104|2.7e-75|thj:104799061|K24104 GPN-loop GTPase | (RefSeq) LOW QUALITY PROTEIN: uncharacterized protein LOC104799061	--	--	--	Protein tyrosine and serine/threonine kinase	Receptor-like serine/threonine-protein kinase SD1-8 OS=Arabidopsis thaliana OX=3702 GN=SD18 PE=1 SV=1	T	Signal transduction mechanisms	unnamed protein product [Prunus armeniaca]
PaF106G0100006388.01	375	228	271	648	713	822	2.09764	1.52264	1.55988	3.94546	4.65142	4.6007	2.5662e-19	1.35846	up	[R]	General function prediction only	Biological Process: signal transduction (GO:0007165);; Molecular Function: ADP binding (GO:0043531);;	K00695|5.2e-84|mtr:MTR_6g478030|K00695 sucrose synthase [EC:2.4.1.13] | (RefSeq) sucrose synthase	Starch and sucrose metabolism (ko00500)	--	--	NB-ARC domain	TMV resistance protein N OS=Nicotiana glutinosa OX=35889 GN=N PE=1 SV=1	T	Signal transduction mechanisms	TMV resistance protein N [Prunus persica]
PaF106G0800032650.01	165	187	170	20	28	40	1.02453	1.38963	1.08993	0.131883	0.200738	0.243386	2.07463e-15	-2.12484	down	[R]	General function prediction only	Biological Process: signal transduction (GO:0007165);; Molecular Function: ADP binding (GO:0043531);;	K00695|1.7e-117|mtr:MTR_6g478030|K00695 sucrose synthase [EC:2.4.1.13] | (RefSeq) sucrose synthase	Starch and sucrose metabolism (ko00500)	--	--	TIR domain	TMV resistance protein N OS=Nicotiana glutinosa OX=35889 GN=N PE=1 SV=1	S	Function unknown	PREDICTED: TMV resistance protein N-like [Prunus mume]
PaF106G0300014492.01	943	666	811	2515	2699	3805	16.5747	14.0028	14.6915	48.1012	55.3746	66.947	1.90115e-62	1.93049	up	[R]	General function prediction only	Molecular Function: molecular_function (GO:0003674);; Molecular Function: catalytic activity (GO:0003824);; Biological Process: cellular aldehyde metabolic process (GO:0006081);; Biological Process: organic acid metabolic process (GO:0006082);; Biological Process: lactate metabolic process (GO:0006089);; Biological Process: biological_process (GO:0008150);; Biological Process: metabolic process (…	K18881|2.8e-227|pmum:103327333|K18881 D-lactate dehydratase [EC:4.2.1.130] | (RefSeq) protein DJ-1 homolog D-like	Pyruvate metabolism (ko00620)	[RV]	General function prediction only;; Defense mechanisms	DJ-1/PfpI family	Protein DJ-1 homolog D OS=Arabidopsis thaliana OX=3702 GN=DJ1D PE=1 SV=1	V	Defense mechanisms	PREDICTED: protein DJ-1 homolog D-like [Prunus mume]
PaF106G0800032487.01	182	168	108	2628	2565	3214	0.93168	1.02087	0.63051	15.4305	15.8986	17.1638	6.75962e-188	4.11077	up	[R]	General function prediction only	Biological Process: signal transduction (GO:0007165);; Molecular Function: ADP binding (GO:0043531);;	K00695|2.4e-101|mtr:MTR_6g478030|K00695 sucrose synthase [EC:2.4.1.13] | (RefSeq) sucrose synthase	Starch and sucrose metabolism (ko00500)	--	--	TIR domain	Disease resistance protein Roq1 OS=Nicotiana benthamiana OX=4100 GN=ROQ1 PE=1 SV=1	S	Function unknown	PREDICTED: TMV resistance protein N-like isoform X2 [Prunus mume]
PaF106G0800031731.01	78	39	29	118	129	81	1.26643	0.756069	0.484512	2.09197	2.4499	1.30788	0.00257371	1.00956	up	[HR]	Coenzyme transport and metabolism;; General function prediction only	Biological Process: sucrose metabolic process (GO:0005985);; Molecular Function: sucrose synthase activity (GO:0016157);; Molecular Function: sucrose-phosphate synthase activity (GO:0046524);;	K00696|4.2e-55|pavi:110746034|K00696 sucrose-phosphate synthase [EC:2.4.1.14] | (RefSeq) probable sucrose-phosphate synthase 2	Starch and sucrose metabolism (ko00500)	[M]	Cell wall/membrane/envelope biogenesis	--	Probable sucrose-phosphate synthase 1 OS=Oryza sativa subsp. indica OX=39946 GN=SPS1 PE=2 SV=2	M	Cell wall/membrane/envelope biogenesis	unnamed protein product [Prunus armeniaca]
PaF106G0700027537.01	119	91	112	473	489	763	1.67539	1.53054	1.6254	7.29138	8.0923	10.8338	2.93524e-40	2.34393	up	[I]	Lipid transport and metabolism	Biological Process: lipid metabolic process (GO:0006629);;	K16818|3.4e-06|dct:110113683|K16818 phospholipase A1 [EC:3.1.1.32] | (RefSeq) phospholipase A(1) DAD1, chloroplastic-like	Glycerophospholipid metabolism (ko00564);; alpha-Linolenic acid metabolism (ko00592)	[I]	Lipid transport and metabolism	Lipase (class 3)	Triacylglycerol lipase OBL1 OS=Nicotiana tabacum OX=4097 GN=OBL1 PE=1 SV=1	I	Lipid transport and metabolism	uncharacterized protein LOC117635169 [Prunus dulcis]
PaF106G0600022511.01	323	304	324	116	97	145	8.70904	9.80061	9.00609	3.38157	3.05145	3.9054	1.08537e-11	-1.24989	down	[I]	Lipid transport and metabolism	--	K18532|2.9e-53|vvi:100253475|K18532 adenylate kinase [EC:2.7.4.3] | (RefSeq) (R)-specific enoyl-CoA hydratase	Purine metabolism (ko00230);; Ribosome biogenesis in eukaryotes (ko03008)	[I]	Lipid transport and metabolism	MaoC like domain	--	I	Lipid transport and metabolism	PREDICTED: (R)-specific enoyl-CoA hydratase [Prunus mume]
PaF106G0200010362.01	4637	4023	4133	1698	1755	2026	54.5466	56.6289	50.1533	21.7341	24.087	23.8521	1.51391e-46	-1.12401	down	[G]	Carbohydrate transport and metabolism	Cellular Component: phosphopyruvate hydratase complex (GO:0000015);; Molecular Function: magnesium ion binding (GO:0000287);; Molecular Function: phosphopyruvate hydratase activity (GO:0004634);; Biological Process: glycolytic process (GO:0006096);; Biological Process: regulation of vacuole fusion, non-autophagic (GO:0032889);;	K01689|5.7e-253|pmum:103333317|K01689 enolase [EC:4.2.1.11] | (RefSeq) enolase	Glycolysis / Gluconeogenesis (ko00010);; Carbon metabolism (ko01200);; Biosynthesis of amino acids (ko01230);; RNA degradation (ko03018)	[G]	Carbohydrate transport and metabolism	Enolase, C-terminal TIM barrel domain	Enolase OS=Oryza sativa subsp. japonica OX=39947 GN=ENO1 PE=1 SV=2	G	Carbohydrate transport and metabolism	PREDICTED: enolase [Prunus mume]
PaF106G0800030461.01	162	216	187	2321	2143	2971	1.15465	1.76331	1.16897	14.9011	14.2372	16.7217	2.97412e-154	3.64292	up	[R]	General function prediction only	Biological Process: signal transduction (GO:0007165);; Molecular Function: ADP binding (GO:0043531);;	K00695|7.0e-102|mtr:MTR_6g478030|K00695 sucrose synthase [EC:2.4.1.13] | (RefSeq) sucrose synthase	Starch and sucrose metabolism (ko00500)	--	--	TIR domain	TMV resistance protein N OS=Nicotiana glutinosa OX=35889 GN=N PE=1 SV=1	S	Function unknown	PREDICTED: TMV resistance protein N-like [Prunus mume]
PaF106G0500018795.01	1114	1234	962	477	349	679	6.65968	8.83381	5.9367	3.10077	2.43476	4.06581	1.3817e-08	-1.02	down	[N]	Cell motility	Cellular Component: integral component of membrane (GO:0016021);; Molecular Function: cellulose synthase (UDP-forming) activity (GO:0016760);; Biological Process: cellulose biosynthetic process (GO:0030244);; Biological Process: cell wall organization (GO:0071555);;	K20924|0.0e+00|pmum:103336832|K20924 cellulose synthase-like protein [EC:2.4.1.-] | (RefSeq) cellulose synthase-like protein D3	--	--	--	Cellulose synthase	Cellulose synthase-like protein D3 OS=Arabidopsis thaliana OX=3702 GN=CSLD3 PE=1 SV=1	G	Carbohydrate transport and metabolism	unnamed protein product [Prunus armeniaca]
PaF106G0100004788.01	1442	1459	1316	614	514	691	9.23306	11.1617	8.68901	4.27564	3.82667	4.42957	9.71128e-20	-1.10636	down	[E]	Amino acid transport and metabolism	Molecular Function: aminopeptidase activity (GO:0004177);; Molecular Function: metallopeptidase activity (GO:0008237);; Molecular Function: zinc ion binding (GO:0008270);;	K08776|0.0e+00|pavi:110765102|K08776 puromycin-sensitive aminopeptidase [EC:3.4.11.-] | (RefSeq) aminopeptidase M1-like	--	[EO]	Amino acid transport and metabolism;; Posttranslational modification, protein turnover, chaperones	ERAP1-like C-terminal domain	Aminopeptidase M1 OS=Arabidopsis thaliana OX=3702 GN=APM1 PE=1 SV=1	--	--	unnamed protein product [Prunus armeniaca]
PaF106G0600024841.01	450	438	531	1135	988	1144	4.57845	5.32982	5.56361	12.5695	11.7248	11.6466	2.89483e-23	1.25154	up	[O]	Posttranslational modification, protein turnover, chaperones	Biological Process: reproduction (GO:0000003);; Biological Process: cell morphogenesis (GO:0000902);; Biological Process: cell morphogenesis involved in differentiation (GO:0000904);; Biological Process: developmental process involved in reproduction (GO:0003006);; Molecular Function: molecular_function (GO:0003674);; Molecular Function: catalytic activity (GO:0003824);; Cellular Component: cellu…	K03686|2.3e-16|ini:109164591|K03686 molecular chaperone DnaJ | (RefSeq) chaperone protein DnaJ	--	[O]	Posttranslational modification, protein turnover, chaperones	DnaJ domain	DnaJ protein ERDJ3A OS=Arabidopsis thaliana OX=3702 GN=ERDJ3A PE=1 SV=1	O	Posttranslational modification, protein turnover, chaperones	unnamed protein product [Prunus armeniaca]
PaF106G0100005824.01	2070	1571	1876	4433	4269	5020	26.3068	22.2434	22.9315	57.1494	58.9266	59.4617	5.51274e-75	1.39133	up	[G]	Carbohydrate transport and metabolism	Molecular Function: UDP-glycosyltransferase activity (GO:0008194);; Cellular Component: intracellular membrane-bounded organelle (GO:0043231);; Molecular Function: quercetin 3-O-glucosyltransferase activity (GO:0080043);; Molecular Function: quercetin 7-O-glucosyltransferase activity (GO:0080044);;	K13691|3.1e-150|jre:108988962|K13691 pathogen-inducible salicylic acid glucosyltransferase [EC:2.4.1.-] | (RefSeq) UDP-glycosyltransferase 74F2-like	--	[GC]	Carbohydrate transport and metabolism;; Energy production and conversion	UDP-glucoronosyl and UDP-glucosyl transferase	UDP-glycosyltransferase 74E2 OS=Arabidopsis thaliana OX=3702 GN=UGT74E2 PE=1 SV=1	--	--	unnamed protein product [Prunus armeniaca]
PaF106G0400015256.01	175	173	185	0	0	0	4.85763	5.72767	5.27803	0	0	0	1.42915e-44	-4.63631	down	[Q]	Secondary metabolites biosynthesis, transport and catabolism	Molecular Function: oxidoreductase activity (GO:0016491);; Molecular Function: metal ion binding (GO:0046872);;	K05278|4.0e-30|psom:113346476|K05278 flavonol synthase [EC:1.14.20.6] | (RefSeq) flavonol synthase/flavanone 3-hydroxylase-like	Flavonoid biosynthesis (ko00941)	[QR]	Secondary metabolites biosynthesis, transport and catabolism;; General function prediction only	2OG-Fe(II) oxygenase superfamily	Probable 2-oxoglutarate-dependent dioxygenase At5g05600 OS=Arabidopsis thaliana OX=3702 GN=At5g05600 PE=2 SV=1	Q	Secondary metabolites biosynthesis, transport and catabolism	unnamed protein product [Prunus armeniaca]
PaF106G0100005795.01	1024	676	1027	341	244	329	17.6346	13.9195	18.2354	6.39105	4.90252	5.6651	4.10999e-19	-1.41167	down	[Q]	Secondary metabolites biosynthesis, transport and catabolism	Molecular Function: metal ion binding (GO:0046872);; Molecular Function: dioxygenase activity (GO:0051213);;	K05278|5.4e-192|pmum:103332906|K05278 flavonol synthase [EC:1.14.20.6] | (RefSeq) flavonol synthase/flavanone 3-hydroxylase-like	Flavonoid biosynthesis (ko00941)	[QR]	Secondary metabolites biosynthesis, transport and catabolism;; General function prediction only	2OG-Fe(II) oxygenase superfamily	Flavonol synthase/flavanone 3-hydroxylase OS=Citrus unshiu OX=55188 GN=FLS PE=1 SV=1	Q	Secondary metabolites biosynthesis, transport and catabolism	unnamed protein product [Prunus armeniaca]
PaF106G0800032652.01	2	0	0	383	491	455	0.008795	0	0	2.10983	2.90043	2.30391	4.10651e-86	5.84896	up	[R]	General function prediction only	Biological Process: signal transduction (GO:0007165);; Molecular Function: ADP binding (GO:0043531);;	K00695|2.5e-129|mtr:MTR_6g478030|K00695 sucrose synthase [EC:2.4.1.13] | (RefSeq) sucrose synthase	Starch and sucrose metabolism (ko00500)	--	--	TIR domain	TMV resistance protein N OS=Nicotiana glutinosa OX=35889 GN=N PE=1 SV=1	S	Function unknown	PREDICTED: TMV resistance protein N-like [Prunus mume]
PaF106G0600023944.01	5	0	7	82	80	126	0.028892	0	0.051009	0.638133	0.664909	0.905686	6.94196e-19	3.04478	up	[R]	General function prediction only	Biological Process: defense response (GO:0006952);; Molecular Function: ADP binding (GO:0043531);;	K13457|0.0e+00|pmum:103334422|K13457 disease resistance protein RPM1 | (RefSeq) disease resistance protein RPM1-like	Plant-pathogen interaction (ko04626)	[T]	Signal transduction mechanisms	NB-ARC domain	Disease resistance protein RPM1 OS=Arabidopsis thaliana OX=3702 GN=RPM1 PE=1 SV=1	T	Signal transduction mechanisms	PREDICTED: disease resistance protein RPM1-like [Prunus mume]
PaF106G0800032256.01	3427	3303	4332	1082	969	1462	39.9125	46.2686	52.1614	14.0174	13.4865	17.4973	1.88535e-35	-1.53705	down	[DPM]	Cell cycle control, cell division, chromosome partitioning;; Inorganic ion transport and metabolism;; Cell wall/membrane/envelope biogenesis	Molecular Function: ferroxidase activity (GO:0004322);; Molecular Function: copper ion binding (GO:0005507);; Cellular Component: plasma membrane (GO:0005886);; Biological Process: iron ion transport (GO:0006826);; Biological Process: lignin catabolic process (GO:0046274);; Cellular Component: apoplast (GO:0048046);; Molecular Function: hydroquinone:oxygen oxidoreductase activity (GO:0052716);; B…	K05909|0.0e+00|pmum:103336352|K05909 laccase [EC:1.10.3.2] | (RefSeq) laccase-15-like	--	[Q]	Secondary metabolites biosynthesis, transport and catabolism	Multicopper oxidase	Putative laccase-9 OS=Oryza sativa subsp. japonica OX=39947 GN=LAC9 PE=3 SV=1	Q	Secondary metabolites biosynthesis, transport and catabolism	unnamed protein product [Prunus armeniaca]
PaF106G0400016870.01	178	210	222	593	469	534	0.980953	1.38324	1.2633	3.56072	3.02211	2.94971	2.69053e-15	1.38551	up	[T]	Signal transduction mechanisms	Molecular Function: protein kinase activity (GO:0004672);; Molecular Function: ATP binding (GO:0005524);; Cellular Component: integral component of membrane (GO:0016021);;	K00924|3.4e-66|csat:104702328|K00924 kinase [EC:2.7.1.-] | (RefSeq) receptor protein kinase CLAVATA1-like	--	--	--	Protein kinase domain	LRR receptor-like serine/threonine-protein kinase GSO1 OS=Arabidopsis thaliana OX=3702 GN=GSO1 PE=1 SV=1	T	Signal transduction mechanisms	LRR receptor-like serine/threonine-protein kinase GSO1 [Prunus yedoensis var. nudiflora]
PaF106G0200010254.01	172	120	131	45	49	63	2.25627	1.87213	1.76825	0.631856	0.747967	0.823093	3.82557e-06	-1.17641	down	[G]	Carbohydrate transport and metabolism	Cellular Component: integral component of membrane (GO:0016021);; Molecular Function: transmembrane transporter activity (GO:0022857);;	K24193|1.0e-282|pper:18785323|K24193 MFS transporter, SP family, sugar:H+ symporter | (RefSeq) hexose carrier protein HEX6	--	[R]	General function prediction only	Sugar (and other) transporter	Hexose carrier protein HEX6 OS=Ricinus communis OX=3988 GN=HEX6 PE=2 SV=1	U	Intracellular trafficking, secretion, and vesicular transport	unnamed protein product [Prunus armeniaca]
PaF106G0700026837.01	1213	933	1080	2566	2456	2940	16.0005	14.3134	14.6199	38.7248	40.5387	40.4706	1.45126e-62	1.37608	up	[GI]	Carbohydrate transport and metabolism;; Lipid transport and metabolism	Cellular Component: extracellular region (GO:0005576);; Cellular Component: cell wall (GO:0005618);; Molecular Function: pectinesterase activity (GO:0030599);; Biological Process: cell wall modification (GO:0042545);; Molecular Function: aspartyl esterase activity (GO:0045330);; Biological Process: pectin catabolic process (GO:0045490);; Molecular Function: pectinesterase inhibitor activity (GO:0…	K01051|6.8e-298|pmum:103340502|K01051 pectinesterase [EC:3.1.1.11] | (RefSeq) pectinesterase/pectinesterase inhibitor PPE8B	Pentose and glucuronate interconversions (ko00040)	--	--	Pectinesterase	Pectinesterase/pectinesterase inhibitor PPE8B OS=Prunus persica OX=3760 PE=2 SV=1	G	Carbohydrate transport and metabolism	unnamed protein product [Prunus armeniaca]
PaF106G0500021260.01	656	442	579	208	223	162	5.41378	4.36924	4.93615	1.87022	2.1463	1.34331	1.2316e-11	-1.29081	down	[P]	Inorganic ion transport and metabolism	Molecular Function: potassium ion transmembrane transporter activity (GO:0015079);; Cellular Component: integral component of membrane (GO:0016021);;	K03549|4.6e-161|pmum:103338808|K03549 KUP system potassium uptake protein | (RefSeq) potassium transporter 2	--	--	--	K+ potassium transporter	Potassium transporter 10 OS=Oryza sativa subsp. japonica OX=39947 GN=HAK10 PE=2 SV=1	O	Posttranslational modification, protein turnover, chaperones	unnamed protein product [Prunus armeniaca]
PaF106G0200008766.01	670	488	624	1259	1309	1355	14.5616	12.6897	13.997	29.79	33.2308	29.5066	2.09715e-26	1.20743	up	[I]	Lipid transport and metabolism	Molecular Function: hydrolase activity (GO:0016787);;	K22097|1.3e-70|psom:113323289|K22097 3-O-acetylpapaveroxine carboxylesterase [EC:3.1.1.105] | (RefSeq) carboxylesterase 1-like	Isoquinoline alkaloid biosynthesis (ko00950)	[V]	Defense mechanisms	alpha/beta hydrolase fold	Probable carboxylesterase 9 OS=Arabidopsis thaliana OX=3702 GN=CXE9 PE=2 SV=1	V	Defense mechanisms	unnamed protein product [Prunus armeniaca]
PaF106G0600024431.01	6424	5630	5287	2198	2199	3316	57.8199	60.6948	49.0581	21.5318	23.0767	29.8452	1.25727e-21	-1.07199	down	[T]	Signal transduction mechanisms	Biological Process: phosphorelay signal transduction system (GO:0000160);; Cellular Component: nucleus (GO:0005634);;	K12129|0.0e+00|pmum:103340410|K12129 pseudo-response regulator 7 | (RefSeq) two-component response regulator-like APRR7 isoform X1	Circadian rhythm - plant (ko04712)	[K]	Transcription	Response regulator receiver domain	Two-component response regulator-like APRR7 OS=Arabidopsis thaliana OX=3702 GN=APRR7 PE=1 SV=1	K	Transcription	unnamed protein product [Prunus armeniaca]
PaF106G0700027837.01	77	79	107	9	6	6	1.01024	1.24051	1.4408	0.116292	0.083256	0.074674	9.25323e-14	-2.50404	down	[O]	Posttranslational modification, protein turnover, chaperones	Molecular Function: ATP binding (GO:0005524);; Cellular Component: cytoplasm (GO:0005737);; Biological Process: response to unfolded protein (GO:0006986);; Molecular Function: ATPase activity (GO:0016887);; Molecular Function: heat shock protein binding (GO:0031072);; Biological Process: cellular response to unfolded protein (GO:0034620);; Biological Process: protein refolding (GO:0042026);; Mole…	K03283|5.5e-276|pmum:103341785|K03283 heat shock 70kDa protein 1/2/6/8 | (RefSeq) heat shock cognate 70 kDa protein-like	Spliceosome (ko03040);; Protein processing in endoplasmic reticulum (ko04141);; Endocytosis (ko04144)	[O]	Posttranslational modification, protein turnover, chaperones	Hsp70 protein	Heat shock cognate 70 kDa protein OS=Petunia hybrida OX=4102 GN=HSP70 PE=2 SV=1	O	Posttranslational modification, protein turnover, chaperones	PREDICTED: heat shock cognate 70 kDa protein-like [Prunus mume]
PaF106G0300012314.01	91	50	34	123	171	204	1.14978	0.750265	0.437414	1.70513	2.5409	2.60318	6.60228e-06	1.3273	up	[G]	Carbohydrate transport and metabolism	Molecular Function: UDP-glycosyltransferase activity (GO:0008194);; Cellular Component: intracellular membrane-bounded organelle (GO:0043231);; Molecular Function: quercetin 3-O-glucosyltransferase activity (GO:0080043);; Molecular Function: quercetin 7-O-glucosyltransferase activity (GO:0080044);;	K22706|2.3e-127|pmum:103319663|K22706 (R)-mandelonitrile beta-glucosyltransferase [EC:2.4.1.354] | (RefSeq) 7-deoxyloganetin glucosyltransferase-like	Cyanoamino acid metabolism (ko00460)	[GC]	Carbohydrate transport and metabolism;; Energy production and conversion	UDP-glucoronosyl and UDP-glucosyl transferase	7-deoxyloganetin glucosyltransferase OS=Gardenia jasminoides OX=114476 GN=UGT85A24 PE=1 SV=1	--	--	PREDICTED: 7-deoxyloganetin glucosyltransferase-like [Prunus mume]
PaF106G0500020276.01	184	150	222	416	344	473	2.49343	2.43349	3.11727	6.16255	5.45409	6.44459	2.17344e-11	1.16559	up	[QV]	Secondary metabolites biosynthesis, transport and catabolism;; Defense mechanisms	Molecular Function: iron ion binding (GO:0005506);; Molecular Function: oxidoreductase activity, acting on paired donors, with incorporation or reduction of molecular oxygen (GO:0016705);; Molecular Function: heme binding (GO:0020037);;	K20665|2.8e-296|pmum:103338054|K20665 jasmonoyl-L-amino acid 12-hydroxylase [EC:1.14.14.48] | (RefSeq) cytochrome P450 94B3	--	[QI]	Secondary metabolites biosynthesis, transport and catabolism;; Lipid transport and metabolism	Cytochrome P450	Cytochrome P450 94B1 OS=Arabidopsis thaliana OX=3702 GN=CYP94B1 PE=1 SV=1	--	--	unnamed protein product [Prunus armeniaca]
PaF106G0400017605.01	70	106	72	298	217	185	0.989441	1.79773	1.05993	4.61848	3.60404	2.64335	5.74304e-07	1.35451	up	[O]	Posttranslational modification, protein turnover, chaperones	Molecular Function: protein serine/threonine kinase activity (GO:0004674);; Molecular Function: ATP binding (GO:0005524);; Biological Process: signal transduction (GO:0007165);; Cellular Component: integral component of membrane (GO:0016021);;	K07198|9.2e-156|vvi:100258329|K07198 5'-AMP-activated protein kinase, catalytic alpha subunit [EC:2.7.11.11] | (RefSeq) CIPK16; CBL-interacting protein kinase 16	--	[T]	Signal transduction mechanisms	Protein kinase domain	CBL-interacting serine/threonine-protein kinase 12 OS=Arabidopsis thaliana OX=3702 GN=CIPK12 PE=1 SV=1	T	Signal transduction mechanisms	unnamed protein product [Prunus armeniaca]
PaF106G0800030442.01	199	188	160	44	69	62	2.66861	3.01517	2.21032	0.635566	1.06507	0.83007	5.36083e-08	-1.36684	down	[P]	Inorganic ion transport and metabolism	Molecular Function: N,N-dimethylaniline monooxygenase activity (GO:0004499);; Molecular Function: flavin adenine dinucleotide binding (GO:0050660);; Molecular Function: NADP binding (GO:0050661);;	K22324|9.9e-15|csat:104714592|K22324 aliphatic glucosinolate S-oxygenase [EC:1.14.13.237] | (RefSeq) flavin-containing monooxygenase FMO GS-OX2 isoform X1	--	[Q]	Secondary metabolites biosynthesis, transport and catabolism	Flavin-binding monooxygenase-like	Probable flavin-containing monooxygenase 1 OS=Arabidopsis thaliana OX=3702 GN=FMO1 PE=2 SV=1	Q	Secondary metabolites biosynthesis, transport and catabolism	unnamed protein product [Prunus armeniaca]
PaF106G0200008090.01	54	46	59	188	161	154	0.698606	0.710326	0.776286	2.60772	2.44	1.93443	2.5757e-10	1.55291	up	[M]	Cell wall/membrane/envelope biogenesis	Molecular Function: hydrolase activity, acting on ester bonds (GO:0016788);;	K01114|5.1e-298|pmum:103331281|K01114 phospholipase C [EC:3.1.4.3] | (RefSeq) non-specific phospholipase C3-like isoform X1	Inositol phosphate metabolism (ko00562);; Glycerophospholipid metabolism (ko00564);; Ether lipid metabolism (ko00565)	--	--	Phosphoesterase family	Non-specific phospholipase C3 OS=Arabidopsis thaliana OX=3702 GN=NPC3 PE=2 SV=1	M	Cell wall/membrane/envelope biogenesis	unnamed protein product [Prunus armeniaca]
PaF106G0800031977.01	188	134	212	521	486	706	2.95203	2.37432	2.7162	7.04612	7.05288	8.79466	1.38505e-23	1.67174	up	[R]	General function prediction only	Molecular Function: 5'-3' exoribonuclease activity (GO:0004534);; Molecular Function: 5'-3' exodeoxyribonuclease activity (GO:0035312);;	K07053|5.7e-131|pmum:103335920|K07053 3',5'-nucleoside bisphosphate phosphatase [EC:3.1.3.97] | (RefSeq) 3',5'-nucleoside bisphosphate phosphatase	--	--	--	PHP domain	--	S	Function unknown	uncharacterized protein LOC18766716 [Prunus persica]
PaF106G0800029666.01	1679	1382	1826	561	508	633	24.2527	23.8941	27.2189	8.82297	8.56249	9.15739	1.16107e-37	-1.40189	down	[R]	General function prediction only	Biological Process: lipid catabolic process (GO:0016042);; Molecular Function: hydrolase activity (GO:0016787);;	--	--	[I]	Lipid transport and metabolism	Patatin-like phospholipase	Probable inactive patatin-like protein 9 OS=Arabidopsis thaliana OX=3702 GN=PLP9 PE=2 SV=1	I	Lipid transport and metabolism	unnamed protein product [Prunus armeniaca]
PaF106G0800032310.01	286	285	284	607	564	795	1.42608	1.702	1.46185	3.29699	3.28878	3.97343	2.23805e-18	1.22894	up	[R]	General function prediction only	Biological Process: signal transduction (GO:0007165);; Cellular Component: integral component of membrane (GO:0016021);; Molecular Function: ADP binding (GO:0043531);;	K00695|3.3e-133|mtr:MTR_6g478030|K00695 sucrose synthase [EC:2.4.1.13] | (RefSeq) sucrose synthase	Starch and sucrose metabolism (ko00500)	--	--	TIR domain	TMV resistance protein N OS=Nicotiana glutinosa OX=35889 GN=N PE=1 SV=1	S	Function unknown	TMV resistance protein N-like [Prunus dulcis]
PaF106G0800031748.01	567	500	627	1516	1449	1492	4.61178	4.58804	5.00235	13.6763	13.1673	11.697	1.01738e-35	1.45171	up	[J]	Translation, ribosomal structure and biogenesis	Molecular Function: aminoacyl-tRNA ligase activity (GO:0004812);; Molecular Function: threonine-tRNA ligase activity (GO:0004829);; Molecular Function: ATP binding (GO:0005524);; Cellular Component: mitochondrion (GO:0005739);; Biological Process: tRNA aminoacylation for protein translation (GO:0006418);; Biological Process: threonyl-tRNA aminoacylation (GO:0006435);; Cellular Component: chloropl…	K01868|0.0e+00|pmum:103335890|K01868 threonyl-tRNA synthetase [EC:6.1.1.3] | (RefSeq) threonine--tRNA ligase, mitochondrial 1-like	Aminoacyl-tRNA biosynthesis (ko00970)	[J]	Translation, ribosomal structure and biogenesis	tRNA synthetase class II core domain (G, H, P, S and T)	Threonine--tRNA ligase, mitochondrial 1 OS=Arabidopsis thaliana OX=3702 GN=THRRS PE=1 SV=3	J	Translation, ribosomal structure and biogenesis	unnamed protein product [Prunus armeniaca]
PaF106G0100006463.01	2301	2018	1857	430	365	540	19.2134	20.1922	15.9639	3.92897	3.55713	4.55451	1.57645e-70	-2.07694	down	[G]	Carbohydrate transport and metabolism	Molecular Function: hydrolase activity, hydrolyzing O-glycosyl compounds (GO:0004553);; Molecular Function: xylan 1,4-beta-xylosidase activity (GO:0009044);; Cellular Component: plant-type cell wall (GO:0009505);; Biological Process: arabinan catabolic process (GO:0031222);; Biological Process: xylan catabolic process (GO:0045493);; Molecular Function: alpha-L-arabinofuranosidase activity (GO:004…	K15920|0.0e+00|pmum:103319154|K15920 xylan 1,4-beta-xylosidase [EC:3.2.1.37] | (RefSeq) beta-xylosidase/alpha-L-arabinofuranosidase 2	Amino sugar and nucleotide sugar metabolism (ko00520)	--	--	Glycosyl hydrolase family 3 C-terminal domain	Beta-xylosidase/alpha-L-arabinofuranosidase 2 OS=Medicago sativa subsp. varia OX=36902 GN=Xyl2 PE=2 SV=1	G	Carbohydrate transport and metabolism	unnamed protein product [Prunus armeniaca]
PaF106G0800029394.01	58	41	55	129	152	163	0.962272	0.799606	0.943292	2.34257	2.95755	2.71266	6.47744e-09	1.43141	up	[V]	Defense mechanisms	Cellular Component: plant-type vacuole (GO:0000325);; Molecular Function: ATP binding (GO:0005524);; Cellular Component: vacuolar membrane (GO:0005774);; Cellular Component: membrane (GO:0016020);; Cellular Component: integral component of membrane (GO:0016021);; Molecular Function: ATPase activity (GO:0016887);; Molecular Function: ATPase activity, coupled to transmembrane movement of substances…	K05666|9.8e-134|pmum:103334086|K05666 ATP-binding cassette, subfamily C (CFTR/MRP), member 2 | (RefSeq) LOW QUALITY PROTEIN: ABC transporter C family member 14-like	ABC transporters (ko02010)	[Q]	Secondary metabolites biosynthesis, transport and catabolism	ABC transporter	ABC transporter C family member 4 OS=Arabidopsis thaliana OX=3702 GN=ABCC4 PE=1 SV=2	Q	Secondary metabolites biosynthesis, transport and catabolism	PREDICTED: LOW QUALITY PROTEIN: ABC transporter C family member 14-like [Prunus mume]
PaF106G0700027901.01	466	389	341	17	40	46	7.12764	7.117	5.37845	0.280709	0.705609	0.693125	6.08301e-37	-3.03521	down	[Q]	Secondary metabolites biosynthesis, transport and catabolism	Molecular Function: oxidoreductase activity (GO:0016491);; Molecular Function: metal ion binding (GO:0046872);;	K13229|1.3e-80|ats:109766943|K13229 2,4-dihydroxy-1,4-benzoxazin-3-one-glucoside dioxygenase [EC:1.14.11.59] | (RefSeq) LOC109766943; DIBOA-glucoside dioxygenase BX6-like	Benzoxazinoid biosynthesis (ko00402)	[QR]	Secondary metabolites biosynthesis, transport and catabolism;; General function prediction only	2OG-Fe(II) oxygenase superfamily	1-aminocyclopropane-1-carboxylate oxidase homolog 4 OS=Arabidopsis thaliana OX=3702 GN=At1g03400 PE=2 SV=1	Q	Secondary metabolites biosynthesis, transport and catabolism	PREDICTED: 1-aminocyclopropane-1-carboxylate oxidase homolog 4-like [Prunus mume]
PaF106G0300011576.01	231	67	199	41	41	43	3.68735	1.24538	3.21526	0.622213	0.709989	0.59155	5.02799e-06	-1.45936	down	[G]	Carbohydrate transport and metabolism	Molecular Function: UDP-glycosyltransferase activity (GO:0008194);; Cellular Component: intracellular membrane-bounded organelle (GO:0043231);;	K23452|1.9e-70|bna:106397643|K23452 UDP-glucosyltransferase 85A [EC:2.4.1.-] | (RefSeq) UDP-glycosyltransferase 85A2 isoform X2	Zeatin biosynthesis (ko00908)	[GC]	Carbohydrate transport and metabolism;; Energy production and conversion	UDP-glucoronosyl and UDP-glucosyl transferase	UDP-glycosyltransferase 83A1 OS=Arabidopsis thaliana OX=3702 GN=UGT83A1 PE=2 SV=1	--	--	PREDICTED: UDP-glycosyltransferase 83A1-like [Prunus mume]
PaF106G0700027591.01	337	292	210	66	90	161	3.94055	4.0793	2.53339	0.832261	1.21977	1.88463	8.48576e-06	-1.16965	down	[IQ]	Lipid transport and metabolism;; Secondary metabolites biosynthesis, transport and catabolism	Molecular Function: CoA-ligase activity (GO:0016405);;	K01904|1.8e-290|pmum:103339831|K01904 4-coumarate--CoA ligase [EC:6.2.1.12] | (RefSeq) 4-coumarate--CoA ligase-like 7	Ubiquinone and other terpenoid-quinone biosynthesis (ko00130);; Phenylpropanoid biosynthesis (ko00940)	[I]	Lipid transport and metabolism	AMP-binding enzyme	4-coumarate--CoA ligase-like 7 OS=Arabidopsis thaliana OX=3702 GN=4CLL7 PE=1 SV=1	I	Lipid transport and metabolism	unnamed protein product [Prunus armeniaca]
PaF106G0100003854.01	1646	601	781	169	327	196	34.8554	15.2224	17.0534	3.89216	8.05942	4.1539	0.000358509	-1.32666	down	[E]	Amino acid transport and metabolism	Molecular Function: channel activity (GO:0015267);; Cellular Component: integral component of membrane (GO:0016021);;	K09874|4.1e-142|pmum:103341593|K09874 aquaporin NIP | (RefSeq) probable aquaporin NIP-type	--	[G]	Carbohydrate transport and metabolism	Major intrinsic protein	Probable aquaporin NIP-type OS=Nicotiana alata OX=4087 PE=2 SV=1	G	Carbohydrate transport and metabolism	unnamed protein product [Prunus armeniaca]
PaF106G0200007143.01	5	11	3	56	74	79	0.019356	0.059876	0.013425	0.286632	0.404472	0.373852	1.21015e-10	2.2912	up	[R]	General function prediction only	Biological Process: defense response (GO:0006952);; Molecular Function: ADP binding (GO:0043531);;	K12818|4.1e-158|mtr:MTR_0267s0070|K12818 ATP-dependent RNA helicase DHX8/PRP22 [EC:3.6.4.13] | (RefSeq) NB-ARC domain disease resistance protein, putative	Spliceosome (ko03040)	[T]	Signal transduction mechanisms	NB-ARC domain	Putative disease resistance RPP13-like protein 1 OS=Arabidopsis thaliana OX=3702 GN=RPPL1 PE=3 SV=1	T	Signal transduction mechanisms	PREDICTED: putative disease resistance RPP13-like protein 1 [Prunus mume]
PaF106G0200009897.01	297	239	245	46	18	74	4.44786	4.29868	3.7758	0.751353	0.302818	1.10347	3.28255e-13	-2.04094	down	[G]	Carbohydrate transport and metabolism	Molecular Function: UDP-glycosyltransferase activity (GO:0008194);;	K13493|2.2e-113|bna:106432180|K13493 cytokinin-N-glucosyltransferase [EC:2.4.1.-] | (RefSeq) UDP-glycosyltransferase 76C2	Zeatin biosynthesis (ko00908)	[GC]	Carbohydrate transport and metabolism;; Energy production and conversion	UDP-glucoronosyl and UDP-glucosyl transferase	UDP-glycosyltransferase 76F1 OS=Arabidopsis thaliana OX=3702 GN=UGT76F1 PE=2 SV=1	--	--	PREDICTED: UDP-glycosyltransferase 76F1-like [Prunus mume]
PaF106G0300012027.01	137	96	117	290	330	342	2.39897	2.00507	2.11267	5.5285	6.74887	6.01061	1.89417e-15	1.45741	up	[QR]	Secondary metabolites biosynthesis, transport and catabolism;; General function prediction only	Molecular Function: oxidoreductase activity (GO:0016491);;	K08070|2.7e-69|crb:17894979|K08070 2-alkenal reductase [EC:1.3.1.74] | (RefSeq) 2-alkenal reductase (NADP(+)-dependent)	--	[R]	General function prediction only	Zinc-binding dehydrogenase	2-alkenal reductase (NADP(+)-dependent) OS=Nicotiana tabacum OX=4097 GN=DBR PE=1 SV=1	S	Function unknown	unnamed protein product [Prunus armeniaca]
PaF106G0600024645.01	50	29	37	113	105	96	1.10903	0.816714	0.871039	2.8557	3.05355	2.13474	6.93987e-06	1.29366	up	[Q]	Secondary metabolites biosynthesis, transport and catabolism	Molecular Function: oxidoreductase activity (GO:0016491);;	K00002|4.2e-181|pper:18773883|K00002 alcohol dehydrogenase (NADP+) [EC:1.1.1.2] | (RefSeq) aldo-keto reductase family 4 member C9	Glycolysis / Gluconeogenesis (ko00010);; Pentose and glucuronate interconversions (ko00040);; Glycerolipid metabolism (ko00561)	[R]	General function prediction only	Aldo/keto reductase family	NADPH-dependent aldo-keto reductase, chloroplastic OS=Arabidopsis thaliana OX=3702 GN=AKR4C9 PE=1 SV=1	L	Replication, recombination and repair	unnamed protein product [Prunus armeniaca]
PaF106G0800030242.01	27	18	41	156	120	143	2.00941	1.56998	3.35042	12.8088	10.6836	11.4729	5.56401e-12	1.96859	up	[C]	Energy production and conversion	Molecular Function: FMN binding (GO:0010181);; Molecular Function: oxidoreductase activity (GO:0016491);;	K05894|2.8e-37|pavi:110750737|K05894 12-oxophytodienoic acid reductase [EC:1.3.1.42] | (RefSeq) 12-oxophytodienoate reductase 1-like	alpha-Linolenic acid metabolism (ko00592)	[CR]	Energy production and conversion;; General function prediction only	NADH:flavin oxidoreductase / NADH oxidase family	12-oxophytodienoate reductase 2 OS=Arabidopsis thaliana OX=3702 GN=OPR2 PE=1 SV=2	C	Energy production and conversion	PREDICTED: putative 12-oxophytodienoate reductase 11 [Prunus mume]
PaF106G0100001853.01	311	310	373	74	69	80	1.62492	1.97378	2.0663	0.37847	0.388869	0.374577	1.35116e-22	-1.91743	down	[R]	General function prediction only	Biological Process: defense response (GO:0006952);; Molecular Function: ADP binding (GO:0043531);;	K15078|2.4e-101|vvi:100255136|K15078 structure-specific endonuclease subunit SLX1 [EC:3.6.1.-] | (RefSeq) putative disease resistance protein RGA1	--	[T]	Signal transduction mechanisms	NB-ARC domain	Putative disease resistance protein RGA3 OS=Solanum bulbocastanum OX=147425 GN=RGA3 PE=2 SV=2	T	Signal transduction mechanisms	unnamed protein product [Prunus armeniaca]
PaF106G0400017668.01	1579	1203	1305	3311	2985	3522	24.5047	22.3461	20.8463	55.8722	54.9993	54.818	1.17338e-53	1.33783	up	[C]	Energy production and conversion	Biological Process: lipid metabolic process (GO:0006629);; Cellular Component: integral component of membrane (GO:0016021);; Molecular Function: lipase activity (GO:0016298);;	K00026|3.1e-41|pmum:103324868|K00026 malate dehydrogenase [EC:1.1.1.37] | (RefSeq) malate dehydrogenase, mitochondrial-like	Citrate cycle (TCA cycle) (ko00020);; Cysteine and methionine metabolism (ko00270);; Pyruvate metabolism (ko00620);; Glyoxylate and dicarboxylate metabolism (ko00630);; Carbon fixation in photosynthetic organisms (ko00710);; Carbon metabolism (ko01200)	--	--	GDSL-like Lipase/Acylhydrolase	GDSL esterase/lipase At1g31550 OS=Arabidopsis thaliana OX=3702 GN=At1g31550 PE=2 SV=1	C	Energy production and conversion	PREDICTED: GDSL esterase/lipase At1g31550-like [Prunus mume]
PaF106G0300012568.01	1401	1208	1288	2095	2734	2927	8.76099	9.09989	8.34185	14.2957	20.03	18.3598	1.11295e-19	1.05383	up	[S]	Function unknown	Molecular Function: protein kinase activity (GO:0004672);; Molecular Function: ATP binding (GO:0005524);; Cellular Component: integral component of membrane (GO:0016021);;	K10406|4.7e-08|smo:SELMODRAFT_105488|K10406 kinesin family member C2/C3 | (RefSeq) hypothetical protein	--	--	--	Malectin domain	Probable LRR receptor-like serine/threonine-protein kinase At1g07650 OS=Arabidopsis thaliana OX=3702 GN=At1g07650 PE=1 SV=1	T	Signal transduction mechanisms	probable LRR receptor-like serine/threonine-protein kinase At1g07650 isoform X1 [Prunus avium]
PaF106G0800029962.01	510	326	534	188	172	201	11.6925	8.94578	12.6309	4.67366	4.60358	4.6118	7.5234e-10	-1.11734	down	[R]	General function prediction only	Molecular Function: acid phosphatase activity (GO:0003993);;	K20728|2.5e-43|thj:104814965|K20728 vegetative storage protein 2 | (RefSeq) vegetative storage protein 2-like	MAPK signaling pathway - plant (ko04016)	--	--	HAD superfamily, subfamily IIIB (Acid phosphatase)	Acid phosphatase 1 OS=Solanum lycopersicum OX=4081 GN=APS1 PE=2 SV=1	S	Function unknown	PREDICTED: acid phosphatase 1-like isoform X2 [Prunus mume]
PaF106G0100003511.01	465	381	376	141	102	131	6.8546	6.72702	5.72014	2.26384	1.74363	1.9309	1.23447e-17	-1.52231	down	[T]	Signal transduction mechanisms	--	K01076|3.7e-176|pmum:103342006|K01076 abhydrolase domain-containing protein 17 [EC:3.1.2.22] | (RefSeq) protein ABHD17B	--	[R]	General function prediction only	Serine aminopeptidase, S33	--	S	Function unknown	PREDICTED: protein ABHD17B [Prunus mume]
PaF106G0800029503.01	96	56	63	265	328	454	1.47798	1.00138	1.00832	4.51968	6.05664	7.12032	7.63259e-23	2.14521	up	[P]	Inorganic ion transport and metabolism	Molecular Function: oxidoreductase activity (GO:0016491);; Molecular Function: flavin adenine dinucleotide binding (GO:0050660);; Molecular Function: NADP binding (GO:0050661);;	K11816|2.1e-186|pmum:103333856|K11816 indole-3-pyruvate monooxygenase [EC:1.14.13.168] | (RefSeq) probable indole-3-pyruvate monooxygenase YUCCA10	Tryptophan metabolism (ko00380)	[Q]	Secondary metabolites biosynthesis, transport and catabolism	Pyridine nucleotide-disulphide oxidoreductase	Probable indole-3-pyruvate monooxygenase YUCCA10 OS=Arabidopsis thaliana OX=3702 GN=YUC10 PE=2 SV=1	Q	Secondary metabolites biosynthesis, transport and catabolism	hypothetical protein PRUPE_8G252500 [Prunus persica]
PaF106G0600023485.01	27	8	27	224	210	213	1.16522	0.412942	1.24406	10.8644	10.9488	9.51371	9.22911e-27	2.91561	up	[S]	Function unknown	--	K09131|9.4e-44|pavi:110747257|K09131 uncharacterized protein | (RefSeq) UPF0235 protein C15orf40-like	--	[S]	Function unknown	Uncharacterised ACR, YggU family COG1872	--	S	Function unknown	UPF0235 protein C15orf40-like [Prunus avium]
PaF106G0100004942.01	578	565	604	198	296	290	10.4974	12.3246	11.7199	4.03671	6.29514	5.46548	7.06222e-09	-1.01198	down	[R]	General function prediction only	Molecular Function: GTP binding (GO:0005525);; Cellular Component: microtubule (GO:0005874);; Biological Process: chloroplast organization (GO:0009658);; Biological Process: embryo development ending in seed dormancy (GO:0009793);; Molecular Function: hydrolase activity (GO:0016787);; Biological Process: cell division (GO:0051301);; Biological Process: shoot apical meristem development (GO:190218…	K24104|1.3e-171|pmum:103320471|K24104 GPN-loop GTPase | (RefSeq) GPN-loop GTPase 2	--	[R]	General function prediction only	Conserved hypothetical ATP binding protein	GPN-loop GTPase QQT1 OS=Arabidopsis thaliana OX=3702 GN=QQT1 PE=1 SV=1	S	Function unknown	PREDICTED: GPN-loop GTPase 2 [Prunus mume]
PaF106G0100004692.01	61	82	73	164	276	280	0.423964	0.683241	0.523706	1.24952	2.26063	1.9676	4.41534e-10	1.58084	up	[ET]	Amino acid transport and metabolism;; Signal transduction mechanisms	Molecular Function: G-protein coupled receptor activity (GO:0004930);; Molecular Function: ligand-gated ion channel activity (GO:0015276);; Cellular Component: integral component of membrane (GO:0016021);;	K05387|0.0e+00|pmum:103320682|K05387 glutamate receptor, ionotropic, plant | (RefSeq) glutamate receptor 2.8-like	--	[PET]	Inorganic ion transport and metabolism;; Amino acid transport and metabolism;; Signal transduction mechanisms	Receptor family ligand binding region	Glutamate receptor 2.8 OS=Arabidopsis thaliana OX=3702 GN=GLR2.8 PE=2 SV=2	--	--	glutamate receptor 2.8-like [Prunus dulcis]
PaF106G0300012067.01	268	110	263	60	13	44	6.14844	3.01417	6.2161	1.49361	0.338059	0.992082	1.34949e-07	-1.75814	down	[K]	Transcription	Molecular Function: ribonuclease III activity (GO:0004525);; Biological Process: RNA processing (GO:0006396);;	K11592|8.0e-41|bdi:100842689|K11592 endoribonuclease Dicer [EC:3.1.26.-] | (RefSeq) endoribonuclease Dicer homolog 1	--	[A]	RNA processing and modification	Ribonuclease III domain	Ribonuclease 3-like protein 3 OS=Oryza sativa subsp. japonica OX=39947 GN=Os06g0358800 PE=2 SV=1	A	RNA processing and modification	unnamed protein product [Prunus armeniaca]
PaF106G0300011913.01	1058	755	1021	1901	1793	1748	8.30753	7.20332	8.29051	16.3122	16.3883	13.8028	1.15136e-16	1.01711	up	[T]	Signal transduction mechanisms	Molecular Function: protein serine/threonine kinase activity (GO:0004674);; Molecular Function: ATP binding (GO:0005524);; Biological Process: recognition of pollen (GO:0048544);;	K24104|8.4e-72|thj:104799061|K24104 GPN-loop GTPase | (RefSeq) LOW QUALITY PROTEIN: uncharacterized protein LOC104799061	--	--	--	Protein tyrosine and serine/threonine kinase	Putative G-type lectin S-receptor-like serine/threonine-protein kinase At1g61610 OS=Arabidopsis thaliana OX=3702 GN=At1g61610 PE=3 SV=1	T	Signal transduction mechanisms	G-type lectin S-receptor-like serine/threonine-protein kinase At4g27290 [Prunus dulcis]
PaF106G0200009401.01	867	672	855	0	0	0	14.0077	13.5104	14.6706	0	0	0	8.45032e-119	-6.66431	down	[F]	Nucleotide transport and metabolism	Molecular Function: catalytic activity (GO:0003824);; Biological Process: nucleoside metabolic process (GO:0009116);;	K07870|2.2e-10|pxb:103958384|K07870 mitochondrial Rho GTPase 1 [EC:3.6.5.-] | (RefSeq) uncharacterized protein LOC103958384	--	--	--	Phosphorylase superfamily	--	F	Nucleotide transport and metabolism	bark storage protein A-like isoform X1 [Prunus avium]
PaF106G0300014446.01	45	31	24	91	66	86	1.23283	1.02282	0.670796	2.74111	2.10395	2.37881	0.000477724	1.10244	up	[T]	Signal transduction mechanisms	--	--	--	--	--	Universal stress protein family	--	S	Function unknown	unnamed protein product [Prunus armeniaca]
PaF106G0300013244.01	851	571	550	95	83	155	15.7541	12.6106	10.4304	1.90095	1.89953	3.03983	1.39439e-32	-2.30328	down	[K]	Transcription	Molecular Function: O-methyltransferase activity (GO:0008171);; Biological Process: methylation (GO:0032259);; Molecular Function: protein dimerization activity (GO:0046983);;	K16040|1.6e-194|pmum:103328492|K16040 trans-resveratrol di-O-methyltransferase [EC:2.1.1.240] | (RefSeq) trans-resveratrol di-O-methyltransferase-like	Stilbenoid, diarylheptanoid and gingerol biosynthesis (ko00945)	[R]	General function prediction only	O-methyltransferase domain	Probable O-methyltransferase 3 OS=Humulus lupulus OX=3486 GN=OMT3 PE=2 SV=1	S	Function unknown	unnamed protein product [Prunus armeniaca]
PaF106G0800032353.01	1895	1629	1941	675	630	690	35.8992	36.8442	37.8071	13.9786	13.9698	12.9963	1.02108e-40	-1.33732	down	[C]	Energy production and conversion	--	K11168|2.7e-197|pmum:103336213|K11168 dehydrogenase/reductase SDR family member 12 [EC:1.1.-.-] | (RefSeq) dehydrogenase/reductase SDR family member 12	--	[Q]	Secondary metabolites biosynthesis, transport and catabolism	short chain dehydrogenase	Short-chain dehydrogenase TIC 32 B, chloroplastic OS=Brassica napus OX=3708 GN=TIC32B PE=3 SV=1	Q	Secondary metabolites biosynthesis, transport and catabolism	PREDICTED: dehydrogenase/reductase SDR family member 12 [Prunus mume]
PaF106G0200007808.01	12	12	12	81	41	79	0.211189	0.242895	0.218919	1.59591	0.865107	1.43101	1.66332e-07	1.81277	up	[QV]	Secondary metabolites biosynthesis, transport and catabolism;; Defense mechanisms	Molecular Function: monooxygenase activity (GO:0004497);; Molecular Function: iron ion binding (GO:0005506);; Cellular Component: integral component of membrane (GO:0016021);; Molecular Function: oxidoreductase activity, acting on paired donors, with incorporation or reduction of molecular oxygen (GO:0016705);; Molecular Function: heme binding (GO:0020037);;	K23806|2.0e-88|vvi:100246293|K23806 alpha-guaiene 2-oxidase | (RefSeq) premnaspirodiene oxygenase-like	--	[Q]	Secondary metabolites biosynthesis, transport and catabolism	Cytochrome P450	Premnaspirodiene oxygenase OS=Hyoscyamus muticus OX=35626 GN=CYP71D55 PE=1 SV=1	Q	Secondary metabolites biosynthesis, transport and catabolism	PREDICTED: premnaspirodiene oxygenase-like [Prunus mume]
PaF106G0400017245.01	301	252	259	81	98	133	2.67225	2.67893	2.36961	0.783559	1.01205	1.18138	3.26014e-09	-1.20204	down	[R]	General function prediction only	Biological Process: reproduction (GO:0000003);; Biological Process: nuclear division (GO:0000280);; Biological Process: developmental process involved in reproduction (GO:0003006);; Molecular Function: protein binding (GO:0005515);; Cellular Component: cellular_component (GO:0005575);; Cellular Component: intracellular (GO:0005622);; Cellular Component: cell (GO:0005623);; Cellular Component: nuc…	K14152|3.8e-124|cpep:111783531|K14152 phosphoribosyl-ATP pyrophosphohydrolase / phosphoribosyl-AMP cyclohydrolase / histidinol dehydrogenase [EC:3.6.1.31 3.5.4.19 1.1.1.23] | (RefSeq) uncharacterized protein LOC111783531	Histidine metabolism (ko00340);; Biosynthesis of amino acids (ko01230)	--	--	Tetratricopeptide repeat	Protein POLLENLESS 3 OS=Arabidopsis thaliana OX=3702 GN=MS5 PE=2 SV=2	S	Function unknown	unnamed protein product [Prunus armeniaca]
PaF106G0200008806.01	68	43	68	152	131	170	1.6245	1.22026	1.66705	3.9787	3.66123	4.08776	2.27469e-07	1.26952	up	[P]	Inorganic ion transport and metabolism	Molecular Function: manganese ion transmembrane transporter activity (GO:0005384);; Cellular Component: integral component of membrane (GO:0016021);; Biological Process: cellular manganese ion homeostasis (GO:0030026);;	K22736|7.6e-128|pmum:103331963|K22736 vacuolar iron transporter family protein | (RefSeq) uncharacterized protein LOC103331963	--	--	--	VIT family	--	S	Function unknown	unnamed protein product [Prunus armeniaca]
PaF106G0400015069.01	3	0	5	71	62	49	0.035244	0	0.079984	1.34538	1.27482	0.861879	2.17601e-12	2.58226	up	[G]	Carbohydrate transport and metabolism	Molecular Function: polygalacturonase activity (GO:0004650);; Cellular Component: extracellular region (GO:0005576);; Biological Process: carbohydrate metabolic process (GO:0005975);; Biological Process: cell wall organization (GO:0071555);;	K01184|1.0e-221|pmum:103326925|K01184 polygalacturonase [EC:3.2.1.15] | (RefSeq) polygalacturonase-like	Pentose and glucuronate interconversions (ko00040)	--	--	Glycosyl hydrolases family 28	Polygalacturonase OS=Prunus persica OX=3760 PE=2 SV=1	G	Carbohydrate transport and metabolism	unnamed protein product [Prunus armeniaca]
PaF106G0700028053.01	3910	3149	3822	6672	6073	8066	35.9252	33.5066	36.2093	65.1422	64.0998	72.9642	8.93473e-41	1.00946	up	[V]	Defense mechanisms	Molecular Function: ATP binding (GO:0005524);; Cellular Component: integral component of membrane (GO:0016021);; Molecular Function: ATPase activity (GO:0016887);;	K05681|5.6e-160|nsy:104217879|K05681 ATP-binding cassette, subfamily G (WHITE), member 2 | (RefSeq) ABC transporter G family member 9-like	ABC transporters (ko02010)	[Q]	Secondary metabolites biosynthesis, transport and catabolism	ABC-2 type transporter	ABC transporter G family member 22 OS=Arabidopsis thaliana OX=3702 GN=ABCG22 PE=1 SV=1	Q	Secondary metabolites biosynthesis, transport and catabolism	unnamed protein product [Prunus armeniaca]
PaF106G0400016052.01	62	54	52	114	151	136	0.949903	0.985032	0.815893	1.91333	2.70529	2.08812	5.67609e-06	1.1777	up	[V]	Defense mechanisms	Molecular Function: antiporter activity (GO:0015297);; Cellular Component: integral component of membrane (GO:0016021);; Molecular Function: xenobiotic transporter activity (GO:0042910);;	K03327|1.6e-231|pavi:110745431|K03327 multidrug resistance protein, MATE family | (RefSeq) protein DETOXIFICATION 19-like	--	[R]	General function prediction only	MatE	Protein DETOXIFICATION 19 OS=Arabidopsis thaliana OX=3702 GN=DTX19 PE=2 SV=1	V	Defense mechanisms	unnamed protein product [Prunus armeniaca]
PaF106G0800029354.01	811	642	721	320	297	373	14.5017	13.5187	13.4648	6.17654	6.13969	6.75868	1.47722e-16	-1.01811	down	[IQR]	Lipid transport and metabolism;; Secondary metabolites biosynthesis, transport and catabolism;; General function prediction only	Cellular Component: cellular_component (GO:0005575);; Cellular Component: extracellular region (GO:0005576);; Biological Process: biological_process (GO:0008150);; Biological Process: positive regulation of metabolic process (GO:0009893);; Biological Process: regulation of catabolic process (GO:0009894);; Biological Process: positive regulation of catabolic process (GO:0009896);; Biological Proce…	K11170|3.2e-62|var:108329937|K11170 dehydrogenase/reductase SDR family member X [EC:1.1.-.-] | (RefSeq) dehydrogenase/reductase SDR family member on chromosome X-like	--	[Q]	Secondary metabolites biosynthesis, transport and catabolism	short chain dehydrogenase	Dehydrogenase/reductase SDR family member FEY OS=Arabidopsis thaliana OX=3702 GN=FEY PE=1 SV=1	Q	Secondary metabolites biosynthesis, transport and catabolism	unnamed protein product [Prunus armeniaca]
PaF106G0200007243.01	793	729	812	170	189	203	3.7892	4.16955	4.0017	0.881362	1.05218	0.970735	4.2182e-44	-1.89805	down	[R]	General function prediction only	Molecular Function: ADP binding (GO:0043531);;	K12818|2.3e-160|mtr:MTR_0267s0070|K12818 ATP-dependent RNA helicase DHX8/PRP22 [EC:3.6.4.13] | (RefSeq) NB-ARC domain disease resistance protein, putative	Spliceosome (ko03040)	[T]	Signal transduction mechanisms	NB-ARC domain	Putative disease resistance RPP13-like protein 1 OS=Arabidopsis thaliana OX=3702 GN=RPPL1 PE=3 SV=1	T	Signal transduction mechanisms	putative disease resistance RPP13-like protein 1 isoform X2 [Prunus dulcis]
PaF106G0400017690.01	127	117	108	396	496	603	0.906245	0.9961	0.788841	3.088	4.1366	4.31431	7.27579e-31	2.03537	up	[ET]	Amino acid transport and metabolism;; Signal transduction mechanisms	Molecular Function: ligand-gated ion channel activity (GO:0015276);; Cellular Component: integral component of membrane (GO:0016021);;	K05387|0.0e+00|pmum:103324849|K05387 glutamate receptor, ionotropic, plant | (RefSeq) glutamate receptor 2.7-like	--	[PET]	Inorganic ion transport and metabolism;; Amino acid transport and metabolism;; Signal transduction mechanisms	Ligand-gated ion channel	Glutamate receptor 3.4 OS=Arabidopsis thaliana OX=3702 GN=GLR3.4 PE=2 SV=2	--	--	unnamed protein product [Prunus armeniaca]
PaF106G0300011745.01	70	49	48	8	10	23	1.32405	1.10242	0.921964	0.157317	0.205374	0.433928	0.00024602	-1.34059	down	[M]	Cell wall/membrane/envelope biogenesis	Molecular Function: 3-beta-hydroxy-delta5-steroid dehydrogenase activity (GO:0003854);; Biological Process: steroid biosynthetic process (GO:0006694);;	K09753|1.1e-35|ppp:112293893|K09753 cinnamoyl-CoA reductase [EC:1.2.1.44] | (RefSeq) cinnamoyl-CoA reductase 1-like	Phenylpropanoid biosynthesis (ko00940)	[V]	Defense mechanisms	3-beta hydroxysteroid dehydrogenase/isomerase family	Cinnamoyl-CoA reductase-like SNL6 OS=Oryza sativa subsp. japonica OX=39947 GN=SNL6 PE=3 SV=1	V	Defense mechanisms	PREDICTED: dihydroflavonol-4-reductase-like [Prunus mume]
PaF106G0100005494.01	25	10	20	138	186	107	0.175805	0.079897	0.145998	1.08608	1.57655	0.776094	1.38949e-14	2.40025	up	[G]	Carbohydrate transport and metabolism	Molecular Function: pectate lyase activity (GO:0030570);; Biological Process: pectin catabolic process (GO:0045490);; Molecular Function: metal ion binding (GO:0046872);;	K01728|5.6e-80|pavi:110764871|K01728 pectate lyase [EC:4.2.2.2] | (RefSeq) probable pectate lyase 4	Pentose and glucuronate interconversions (ko00040)	--	--	Pectate lyase	Pectate lyase 1 OS=Hesperocyparis arizonica OX=49011 PE=1 SV=2	G	Carbohydrate transport and metabolism	probable pectate lyase 4 [Prunus avium]
PaF106G0700028092.01	148	93	89	287	230	262	1.93865	1.46206	1.21766	4.13667	3.55275	3.467	2.2886e-08	1.22208	up	[R]	General function prediction only	Molecular Function: anaphase-promoting complex binding (GO:0010997);; Biological Process: cell division (GO:0051301);; Molecular Function: ubiquitin-protein transferase activator activity (GO:0097027);; Biological Process: positive regulation of ubiquitin protein ligase activity (GO:1904668);;	K03363|1.8e-259|pavi:110748657|K03363 cell division cycle 20, cofactor of APC complex | (RefSeq) cell division cycle 20.1, cofactor of APC complex-like	Ubiquitin mediated proteolysis (ko04120)	[DO]	Cell cycle control, cell division, chromosome partitioning;; Posttranslational modification, protein turnover, chaperones	WD domain, G-beta repeat	Cell division cycle 20.1, cofactor of APC complex OS=Arabidopsis thaliana OX=3702 GN=CDC20-1 PE=1 SV=1	--	--	unnamed protein product [Prunus armeniaca]
PaF106G0100003068.01	47	41	58	170	160	148	0.633989	0.672929	0.810143	2.53622	2.54921	2.03518	3.3019e-10	1.58345	up	[R]	General function prediction only	--	K22544|1.4e-226|pper:18789682|K22544 deoxynucleoside triphosphate triphosphohydrolase SAMHD1 [EC:3.1.5.-] | (RefSeq) deoxynucleoside triphosphate triphosphohydrolase SAMHD1 homolog isoform X1	--	[S]	Function unknown	HD domain	--	S	Function unknown	hypothetical protein PRUPE_1G254300 [Prunus persica]
PaF106G0800031494.01	2395	909	1174	484	615	480	18.6444	8.46136	9.42759	4.09764	5.58676	3.74088	0.00216418	-1.04361	down	[M]	Cell wall/membrane/envelope biogenesis	Molecular Function: protein kinase activity (GO:0004672);; Molecular Function: ATP binding (GO:0005524);; Cellular Component: plasma membrane (GO:0005886);; Cellular Component: plasmodesma (GO:0009506);; Cellular Component: integral component of membrane (GO:0016021);; Biological Process: protein autophosphorylation (GO:0046777);;	K13435|8.0e-97|spen:107018783|K13435 serine/threonine-protein kinase Pto | (RefSeq) receptor-like protein kinase HERK 1 isoform X2	Plant-pathogen interaction (ko04626)	[T]	Signal transduction mechanisms	Protein tyrosine and serine/threonine kinase	Probable receptor-like protein kinase At2g21480 OS=Arabidopsis thaliana OX=3702 GN=At2g21480 PE=3 SV=1	T	Signal transduction mechanisms	PREDICTED: probable receptor-like protein kinase At2g21480 [Prunus mume]
PaF106G0300012012.01	22	18	48	99	63	94	0.2703	0.259707	0.615114	1.33192	0.914351	1.17074	0.000354889	1.22152	up	[V]	Defense mechanisms	Molecular Function: antiporter activity (GO:0015297);; Cellular Component: integral component of membrane (GO:0016021);; Molecular Function: xenobiotic transporter activity (GO:0042910);;	K03327|1.2e-281|pmum:103329387|K03327 multidrug resistance protein, MATE family | (RefSeq) protein DETOXIFICATION 40-like	--	[R]	General function prediction only	MatE	Protein DETOXIFICATION 40 OS=Arabidopsis thaliana OX=3702 GN=DTX40 PE=1 SV=1	L	Replication, recombination and repair	PREDICTED: protein DETOXIFICATION 40-like [Prunus mume]
PaF106G0800032651.01	122	128	170	364	383	437	0.696433	0.871484	0.999608	2.26117	2.55416	2.49744	6.27433e-16	1.47866	up	[K]	Transcription	Biological Process: signal transduction (GO:0007165);; Molecular Function: ADP binding (GO:0043531);;	K00695|2.6e-119|mtr:MTR_6g478030|K00695 sucrose synthase [EC:2.4.1.13] | (RefSeq) sucrose synthase	Starch and sucrose metabolism (ko00500)	--	--	TIR domain	TMV resistance protein N OS=Nicotiana glutinosa OX=35889 GN=N PE=1 SV=1	S	Function unknown	PREDICTED: TMV resistance protein N-like [Prunus mume]
PaF106G0800030124.01	248	110	108	27	54	35	3.35899	1.86039	1.51069	0.44478	0.883713	0.473179	6.14668e-06	-1.45817	down	[T]	Signal transduction mechanisms	Molecular Function: protein serine/threonine kinase activity (GO:0004674);; Molecular Function: ATP binding (GO:0005524);;	K13430|2.4e-134|pda:103708100|K13430 serine/threonine-protein kinase PBS1 [EC:2.7.11.1] | (RefSeq) serine/threonine-protein kinase PBS1-like	Plant-pathogen interaction (ko04626)	[T]	Signal transduction mechanisms	Protein kinase domain	Probable serine/threonine-protein kinase PBL26 OS=Arabidopsis thaliana OX=3702 GN=PBL26 PE=2 SV=1	T	Signal transduction mechanisms	unnamed protein product [Prunus armeniaca]
PaF106G0800032547.01	24	24	24	397	338	483	0.140792	0.172319	0.149912	2.61563	2.3922	2.93263	1.32443e-68	3.746	up	[R]	General function prediction only	Biological Process: signal transduction (GO:0007165);; Molecular Function: ADP binding (GO:0043531);;	K00695|1.8e-113|mtr:MTR_6g478030|K00695 sucrose synthase [EC:2.4.1.13] | (RefSeq) sucrose synthase	Starch and sucrose metabolism (ko00500)	--	--	TIR domain	Disease resistance protein RUN1 OS=Vitis rotundifolia OX=103349 GN=RUN1 PE=1 SV=1	S	Function unknown	hypothetical protein PRUPE_8G056700 [Prunus persica]
PaF106G0100000566.01	246	191	156	520	518	607	1.8332	1.70246	1.19227	4.21191	4.50089	4.52241	2.88985e-19	1.4817	up	[K]	Transcription	Biological Process: defense response (GO:0006952);; Molecular Function: ADP binding (GO:0043531);;	K13457|6.4e-105|qsu:112007111|K13457 disease resistance protein RPM1 | (RefSeq) disease resistance protein RPM1-like	Plant-pathogen interaction (ko04626)	[T]	Signal transduction mechanisms	NB-ARC domain	Putative disease resistance protein At1g50180 OS=Arabidopsis thaliana OX=3702 GN=At1g50180 PE=3 SV=2	T	Signal transduction mechanisms	PREDICTED: putative disease resistance protein At1g50180 isoform X1 [Prunus mume]
PaF106G0700029083.01	0	0	0	52	57	48	0	0	0	1.50299	1.75651	1.26385	1.21786e-15	2.98036	up	[I]	Lipid transport and metabolism	Molecular Function: 3-hydroxyisobutyryl-CoA hydrolase activity (GO:0003860);;	K05605|5.3e-41|pmum:103328923|K05605 3-hydroxyisobutyryl-CoA hydrolase [EC:3.1.2.4] | (RefSeq) 3-hydroxyisobutyryl-CoA hydrolase-like protein 5	Valine, leucine and isoleucine degradation (ko00280);; beta-Alanine metabolism (ko00410);; Propanoate metabolism (ko00640);; Carbon metabolism (ko01200)	--	--	Enoyl-CoA hydratase/isomerase	3-hydroxyisobutyryl-CoA hydrolase-like protein 5 OS=Arabidopsis thaliana OX=3702 GN=At1g06550 PE=1 SV=2	I	Lipid transport and metabolism	unnamed protein product [Prunus armeniaca]
PaF106G0300012431.01	140	99	143	248	381	357	1.17558	0.998594	1.2297	2.35299	3.88559	3.04022	2.96205e-10	1.34244	up	[M]	Cell wall/membrane/envelope biogenesis	Molecular Function: protein kinase activity (GO:0004672);; Molecular Function: calcium ion binding (GO:0005509);; Molecular Function: ATP binding (GO:0005524);; Cellular Component: integral component of membrane (GO:0016021);; Molecular Function: polysaccharide binding (GO:0030247);;	K23544|3.1e-150|brp:103842861|K23544 serine incorporator 1/3 | (RefSeq) serine incorporator 3	--	--	--	Protein kinase domain	Wall-associated receptor kinase-like 3 OS=Arabidopsis thaliana OX=3702 GN=WAKL3 PE=2 SV=2	T	Signal transduction mechanisms	PREDICTED: wall-associated receptor kinase-like 3 [Prunus mume]
PaF106G0100006439.01	104	115	148	270	296	293	0.491349	0.646705	0.72255	1.39054	1.63703	1.38748	5.26231e-09	1.20993	up	[R]	General function prediction only	Biological Process: signal transduction (GO:0007165);; Molecular Function: ADP binding (GO:0043531);;	K00695|4.7e-93|mtr:MTR_6g478030|K00695 sucrose synthase [EC:2.4.1.13] | (RefSeq) sucrose synthase	Starch and sucrose metabolism (ko00500)	--	--	NB-ARC domain	TMV resistance protein N OS=Nicotiana glutinosa OX=35889 GN=N PE=1 SV=1	T	Signal transduction mechanisms	TMV resistance protein N isoform X7 [Prunus persica]
PaF106G0200007393.01	158	138	188	323	299	399	0.798343	0.830144	0.979384	1.77537	1.76424	2.0181	6.12298e-10	1.09355	up	[R]	General function prediction only	Molecular Function: ADP binding (GO:0043531);;	K12818|1.7e-199|mtr:MTR_0267s0070|K12818 ATP-dependent RNA helicase DHX8/PRP22 [EC:3.6.4.13] | (RefSeq) NB-ARC domain disease resistance protein, putative	Spliceosome (ko03040)	[T]	Signal transduction mechanisms	NB-ARC domain	Putative disease resistance RPP13-like protein 1 OS=Arabidopsis thaliana OX=3702 GN=RPPL1 PE=3 SV=1	T	Signal transduction mechanisms	PREDICTED: LOW QUALITY PROTEIN: putative disease resistance RPP13-like protein 1 [Prunus mume]
PaF106G0700026042.01	2645	1932	2509	769	673	770	24.1842	21.1075	23.4892	7.64581	7.36401	7.05926	1.8546e-50	-1.55099	down	[T]	Signal transduction mechanisms	Molecular Function: protein serine/threonine kinase activity (GO:0004674);; Molecular Function: ATP binding (GO:0005524);; Cellular Component: plasma membrane (GO:0005886);; Biological Process: carbohydrate metabolic process (GO:0005975);; Biological Process: protein phosphorylation (GO:0006468);; Molecular Function: chitin binding (GO:0008061);; Cellular Component: integral component of membrane…	K01183|1.9e-83|nsy:104241083|K01183 chitinase [EC:3.2.1.14] | (RefSeq) chitinase-3-like protein 2	Amino sugar and nucleotide sugar metabolism (ko00520)	--	--	Protein tyrosine and serine/threonine kinase	G-type lectin S-receptor-like serine/threonine-protein kinase At1g11330 OS=Arabidopsis thaliana OX=3702 GN=At1g11330 PE=1 SV=3	T	Signal transduction mechanisms	PREDICTED: cysteine-rich receptor-like protein kinase 5 isoform X1 [Prunus mume]
PaF106G0200008741.01	22	22	6	54	39	79	0.252332	0.295993	0.066447	0.676948	0.52136	0.904613	0.00132404	1.21148	up	[QV]	Secondary metabolites biosynthesis, transport and catabolism;; Defense mechanisms	Molecular Function: monooxygenase activity (GO:0004497);; Molecular Function: iron ion binding (GO:0005506);; Cellular Component: integral component of membrane (GO:0016021);; Molecular Function: oxidoreductase activity, acting on paired donors, with incorporation or reduction of molecular oxygen (GO:0016705);; Molecular Function: heme binding (GO:0020037);;	K20495|5.8e-90|ppp:112291140|K20495 long-chain fatty acid omega-monooxygenase [EC:1.14.14.80] | (RefSeq) cytochrome P450 704B1-like	Fatty acid degradation (ko00071);; Cutin, suberine and wax biosynthesis (ko00073)	[QI]	Secondary metabolites biosynthesis, transport and catabolism;; Lipid transport and metabolism	Cytochrome P450	Cytochrome P450 704C1 OS=Pinus taeda OX=3352 GN=CYP704C1 PE=2 SV=1	Q	Secondary metabolites biosynthesis, transport and catabolism	unnamed protein product [Prunus armeniaca]
PaF106G0100004820.01	1455	1323	1383	653	497	771	17.6325	19.18	17.2878	8.60056	7.03022	9.34824	8.18795e-17	-1.01157	down	[M]	Cell wall/membrane/envelope biogenesis	Molecular Function: catalytic activity (GO:0003824);;	K06118|3.0e-284|pmum:103320566|K06118 UDP-sulfoquinovose synthase [EC:3.13.1.1] | (RefSeq) UDP-sulfoquinovose synthase, chloroplastic	Amino sugar and nucleotide sugar metabolism (ko00520);; Glycerolipid metabolism (ko00561)	[M]	Cell wall/membrane/envelope biogenesis	NAD dependent epimerase/dehydratase family	UDP-sulfoquinovose synthase, chloroplastic OS=Spinacia oleracea OX=3562 GN=SQD1 PE=1 SV=1	M	Cell wall/membrane/envelope biogenesis	unnamed protein product [Prunus armeniaca]
PaF106G0300012378.01	317	206	244	42	39	39	2.86296	2.23154	2.27493	0.409027	0.404457	0.346523	6.27902e-24	-2.30012	down	[M]	Cell wall/membrane/envelope biogenesis	Molecular Function: protein kinase activity (GO:0004672);; Molecular Function: calcium ion binding (GO:0005509);; Molecular Function: ATP binding (GO:0005524);; Cellular Component: integral component of membrane (GO:0016021);; Molecular Function: polysaccharide binding (GO:0030247);;	K23544|3.4e-149|brp:103842861|K23544 serine incorporator 1/3 | (RefSeq) serine incorporator 3	--	--	--	Protein kinase domain	Wall-associated receptor kinase-like 2 OS=Arabidopsis thaliana OX=3702 GN=WAKL2 PE=2 SV=1	T	Signal transduction mechanisms	PREDICTED: wall-associated receptor kinase-like 1 [Prunus mume]
PaF106G0700027731.01	103	86	92	26	9	42	1.37374	1.361	1.26252	0.376136	0.125874	0.557046	8.2363e-05	-1.34897	down	[Q]	Secondary metabolites biosynthesis, transport and catabolism	Molecular Function: diacylglycerol O-acyltransferase activity (GO:0004144);; Cellular Component: plasma membrane (GO:0005886);; Biological Process: triglyceride biosynthetic process (GO:0019432);; Molecular Function: long-chain-alcohol O-fatty-acyltransferase activity (GO:0047196);;	K20098|7.3e-62|mtr:MTR_4g078460|K20098 DNA excision repair protein ERCC-6-like 2 [EC:3.6.4.-] | (RefSeq) DNA repair and recombination RAD26-like protein, putative	--	--	--	WS/DGAT C-terminal domain	--	S	Function unknown	PREDICTED: O-acyltransferase WSD1-like [Prunus mume]
PaF106G0600025315.01	484	537	605	220	209	293	20.7671	27.5681	26.8055	10.2654	10.4403	12.577	5.0778e-10	-1.04454	down	[O]	Posttranslational modification, protein turnover, chaperones	Biological Process: response to cyclopentenone (GO:0010583);;	K09510|2.7e-11|nau:109209100|K09510 DnaJ homolog subfamily B member 4 | (RefSeq) dnaJ homolog subfamily B member 1-like	--	[O]	Posttranslational modification, protein turnover, chaperones	DnaJ domain	Chaperone protein dnaJ 16 OS=Arabidopsis thaliana OX=3702 GN=ATJ16 PE=2 SV=1	O	Posttranslational modification, protein turnover, chaperones	chaperone protein DnaJ isoform X1 [Prunus dulcis]
PaF106G0300012958.01	62	21	49	106	107	111	1.35344	0.538351	1.11732	2.53649	2.76267	2.4406	0.000214397	1.146	up	[O]	Posttranslational modification, protein turnover, chaperones	Molecular Function: cysteine-type endopeptidase activity (GO:0004197);; Cellular Component: integral component of membrane (GO:0016021);; Biological Process: CAAX-box protein processing (GO:0071586);;	K23336|3.3e-20|smo:SELMODRAFT_439598|K23336 armadillo repeat-containing protein 8 | (RefSeq) hypothetical protein	--	--	--	CPBP intramembrane metalloprotease	--	S	Function unknown	PREDICTED: uncharacterized protein LOC103343368 isoform X2 [Prunus mume]
PaF106G0600024640.01	138	74	168	0	7	5	3.82974	2.44766	4.81151	0	0.2247	0.133809	1.59729e-19	-3.11992	down	[R]	General function prediction only	Molecular Function: molecular_function (GO:0003674);; Molecular Function: catalytic activity (GO:0003824);; Biological Process: cellular aldehyde metabolic process (GO:0006081);; Biological Process: organic acid metabolic process (GO:0006082);; Biological Process: lactate metabolic process (GO:0006089);; Biological Process: biological_process (GO:0008150);; Biological Process: metabolic process (…	K18881|8.7e-57|pavi:110765120|K18881 D-lactate dehydratase [EC:4.2.1.130] | (RefSeq) protein DJ-1 homolog D-like	Pyruvate metabolism (ko00620)	[RV]	General function prediction only;; Defense mechanisms	DJ-1/PfpI family	Protein DJ-1 homolog D OS=Arabidopsis thaliana OX=3702 GN=DJ1D PE=1 SV=1	V	Defense mechanisms	protein DJ-1 homolog D-like [Prunus dulcis]
PaF106G0600021864.01	27	16	27	58	64	52	0.805792	0.54858	0.838525	1.87504	2.25274	1.56275	0.00171054	1.07714	up	[O]	Posttranslational modification, protein turnover, chaperones	Molecular Function: metalloendopeptidase activity (GO:0004222);; Molecular Function: metal ion binding (GO:0046872);;	K01411|2.9e-38|pper:18772714|K01411 nardilysin [EC:3.4.24.61] | (RefSeq) nardilysin-like	--	[O]	Posttranslational modification, protein turnover, chaperones	--	Nardilysin-like OS=Arabidopsis thaliana OX=3702 GN=At1g06900 PE=2 SV=1	O	Posttranslational modification, protein turnover, chaperones	unnamed protein product [Prunus armeniaca]
PaF106G0400016068.01	2616	2135	2418	856	827	910	44.2163	43.1897	42.1569	15.7402	16.308	15.3903	5.3318e-54	-1.35536	down	[I]	Lipid transport and metabolism	Molecular Function: 3-hydroxyacyl-CoA dehydrogenase activity (GO:0003857);; Biological Process: fatty acid metabolic process (GO:0006631);; Molecular Function: NAD+ binding (GO:0070403);;	K00074|6.7e-165|pmum:103326052|K00074 3-hydroxybutyryl-CoA dehydrogenase [EC:1.1.1.157] | (RefSeq) 3-hydroxybutyryl-CoA dehydrogenase	Phenylalanine metabolism (ko00360);; Butanoate metabolism (ko00650);; Carbon metabolism (ko01200)	[I]	Lipid transport and metabolism	3-hydroxyacyl-CoA dehydrogenase, NAD binding domain	--	I	Lipid transport and metabolism	unnamed protein product [Prunus armeniaca]
PaF106G0200008874.01	1412	1086	1289	308	283	303	23.742	22.4129	22.4083	5.62004	5.22563	4.72417	7.48635e-62	-1.9357	down	[U]	Intracellular trafficking, secretion, and vesicular transport	Molecular Function: GTPase activity (GO:0003924);; Molecular Function: signal recognition particle binding (GO:0005047);; Molecular Function: GTP binding (GO:0005525);; Biological Process: protein targeting (GO:0006605);; Biological Process: SRP-dependent cotranslational protein targeting to membrane (GO:0006614);; Cellular Component: membrane (GO:0016020);;	K03110|5.0e-199|pmum:103331861|K03110 fused signal recognition particle receptor | (RefSeq) cell division protein FtsY homolog, chloroplastic	Protein export (ko03060)	[U]	Intracellular trafficking, secretion, and vesicular transport	SRP54-type protein, GTPase domain	Cell division protein FtsY homolog, chloroplastic OS=Arabidopsis thaliana OX=3702 GN=CPFTSY PE=1 SV=2	U	Intracellular trafficking, secretion, and vesicular transport	unnamed protein product [Prunus armeniaca]
PaF106G0200010775.01	242	183	151	331	597	486	3.86114	3.49367	2.47849	5.74608	11.1263	7.76585	2.54057e-08	1.26353	up	[Q]	Secondary metabolites biosynthesis, transport and catabolism	Molecular Function: metal ion binding (GO:0046872);; Molecular Function: dioxygenase activity (GO:0051213);;	K24028|4.5e-194|pavi:110749563|K24028 salicylic acid 3-hydroxylase [EC:1.14.11.-] | (RefSeq) protein DOWNY MILDEW RESISTANCE 6	--	[QR]	Secondary metabolites biosynthesis, transport and catabolism;; General function prediction only	2OG-Fe(II) oxygenase superfamily	Protein DOWNY MILDEW RESISTANCE 6 OS=Arabidopsis thaliana OX=3702 GN=DMR6 PE=1 SV=1	Q	Secondary metabolites biosynthesis, transport and catabolism	unnamed protein product [Prunus armeniaca]
Prunus_sibirica_newGene_1378	204	266	187	0	0	0	2.41333	3.75902	2.28209	0	0	0	1.18461e-47	-4.79035	down	[O]	Posttranslational modification, protein turnover, chaperones	Molecular Function: ATP binding (GO:0005524);;	K03283|1.4e-237|pmum:103341773|K03283 heat shock 70kDa protein 1/2/6/8 | (RefSeq) heat shock cognate 70 kDa protein-like	Spliceosome (ko03040);; Protein processing in endoplasmic reticulum (ko04141);; Endocytosis (ko04144)	[O]	Posttranslational modification, protein turnover, chaperones	Hsp70 protein	Heat shock 70 kDa protein 18 OS=Arabidopsis thaliana OX=3702 GN=HSP70-18 PE=2 SV=1	O	Posttranslational modification, protein turnover, chaperones	PREDICTED: heat shock cognate 70 kDa protein-like [Prunus mume]
PaF106G0800031023.01	92	45	57	268	388	435	1.28159	0.736536	0.820376	4.06113	6.3183	6.06537	6.66123e-24	2.31468	up	[G]	Carbohydrate transport and metabolism	Molecular Function: UDP-glycosyltransferase activity (GO:0008194);;	K23260|2.4e-281|pmum:103335255|K23260 scopoletin glucosyltransferase [EC:2.4.1.128] | (RefSeq) scopoletin glucosyltransferase-like	Phenylpropanoid biosynthesis (ko00940)	[GC]	Carbohydrate transport and metabolism;; Energy production and conversion	UDP-glucoronosyl and UDP-glucosyl transferase	Scopoletin glucosyltransferase OS=Nicotiana tabacum OX=4097 GN=TOGT1 PE=1 SV=1	--	--	unnamed protein product [Prunus armeniaca]
PaF106G0100006049.01	5	0	0	65	51	55	0.068814	0	0	0.968432	0.813506	0.761675	1.79378e-12	2.62641	up	[G]	Carbohydrate transport and metabolism	Molecular Function: hydrolase activity, hydrolyzing O-glycosyl compounds (GO:0004553);; Biological Process: carbohydrate metabolic process (GO:0005975);;	K01188|3.7e-63|fve:101292823|K01188 beta-glucosidase [EC:3.2.1.21] | (RefSeq) beta-glucosidase 24-like	Cyanoamino acid metabolism (ko00460);; Starch and sucrose metabolism (ko00500);; Phenylpropanoid biosynthesis (ko00940)	[G]	Carbohydrate transport and metabolism	Glycosyl hydrolase family 1	Beta-glucosidase 24 OS=Oryza sativa subsp. japonica OX=39947 GN=BGLU24 PE=2 SV=1	G	Carbohydrate transport and metabolism	beta-glucosidase 24-like [Prunus avium]
PaF106G0500020376.01	467	328	324	131	132	204	2.72729	2.29271	1.94726	0.828741	0.898765	1.18961	1.69405e-08	-1.09802	down	[L]	Replication, recombination and repair	Molecular Function: DNA binding (GO:0003677);; Molecular Function: DNA-directed DNA polymerase activity (GO:0003887);; Molecular Function: ATP binding (GO:0005524);; Biological Process: DNA replication (GO:0006260);; Cellular Component: DNA polymerase III complex (GO:0009360);;	K10756|5.3e-12|ota:OT_ostta02g00555|K10756 replication factor C subunit 3/5 | (RefSeq) P-loop containing nucleoside triphosphate hydrolase	DNA replication (ko03030);; Nucleotide excision repair (ko03420);; Mismatch repair (ko03430)	[L]	Replication, recombination and repair	DNA polymerase III, delta subunit	Protein STICHEL-like 2 OS=Arabidopsis thaliana OX=3702 GN=At4g24790 PE=3 SV=1	L	Replication, recombination and repair	unnamed protein product [Prunus armeniaca]
PaF106G0300013739.01	100	73	84	152	158	237	1.84976	1.61025	1.60221	3.08384	3.43972	4.41028	4.14295e-06	1.05664	up	[Q]	Secondary metabolites biosynthesis, transport and catabolism	Molecular Function: oxidoreductase activity (GO:0016491);; Molecular Function: metal ion binding (GO:0046872);;	K04124|1.7e-218|pavi:110760088|K04124 gibberellin 3beta-dioxygenase [EC:1.14.11.15] | (RefSeq) gibberellin 3-beta-dioxygenase 1	Diterpenoid biosynthesis (ko00904)	[QR]	Secondary metabolites biosynthesis, transport and catabolism;; General function prediction only	2OG-Fe(II) oxygenase superfamily	Gibberellin 3-beta-dioxygenase 1 OS=Pisum sativum OX=3888 GN=LE PE=1 SV=1	Q	Secondary metabolites biosynthesis, transport and catabolism	unnamed protein product [Prunus armeniaca]
PaF106G0600022647.01	121	84	121	48	21	16	1.58499	1.31073	1.62271	0.675073	0.317072	0.198846	6.68208e-05	-1.35775	down	[P]	Inorganic ion transport and metabolism	Cellular Component: plasma membrane (GO:0005886);; Cellular Component: plant-type vacuole membrane (GO:0009705);; Molecular Function: nitrate transmembrane transporter activity (GO:0015112);; Biological Process: nitrate transport (GO:0015706);; Cellular Component: integral component of membrane (GO:0016021);; Biological Process: cellular response to nitrate (GO:0071249);;	K02575|1.5e-305|pmum:103325807|K02575 MFS transporter, NNP family, nitrate/nitrite transporter | (RefSeq) high-affinity nitrate transporter 2.1-like	Nitrogen metabolism (ko00910)	--	--	Major Facilitator Superfamily	High-affinity nitrate transporter 2.1 OS=Arabidopsis thaliana OX=3702 GN=NRT2.1 PE=1 SV=1	P	Inorganic ion transport and metabolism	unnamed protein product [Prunus armeniaca]
PaF106G0800031474.01	77	59	78	28	14	19	1.10787	1.01383	1.16567	0.432282	0.223956	0.265381	0.000112088	-1.29854	down	[MDT]	Cell wall/membrane/envelope biogenesis;; Cell cycle control, cell division, chromosome partitioning;; Signal transduction mechanisms	Molecular Function: ATP binding (GO:0005524);;	K08900|1.1e-156|jre:108986998|K08900 mitochondrial chaperone BCS1 | (RefSeq) AAA-ATPase At3g50940-like	--	[O]	Posttranslational modification, protein turnover, chaperones	ATPase family associated with various cellular activities (AAA)	Protein HYPER-SENSITIVITY-RELATED 4 OS=Arabidopsis thaliana OX=3702 GN=HSR4 PE=2 SV=1	O	Posttranslational modification, protein turnover, chaperones	unnamed protein product [Prunus armeniaca]
PaF106G0500020819.01	157	180	192	432	396	501	4.09962	5.61129	5.16855	12.2921	12.0922	13.1086	2.1481e-15	1.33163	up	[T]	Signal transduction mechanisms	Biological Process: phosphorelay signal transduction system (GO:0000160);;	K12127|7.9e-37|hbr:110635669|K12127 pseudo-response regulator 1 | (RefSeq) two-component response regulator-like APRR1	Circadian rhythm - plant (ko04712)	[K]	Transcription	Response regulator receiver domain	Two-component response regulator-like APRR1 OS=Arabidopsis thaliana OX=3702 GN=APRR1 PE=1 SV=1	K	Transcription	unnamed protein product [Prunus armeniaca]
PaF106G0100003842.01	10120	10069	11183	3931	3164	3868	144.634	172.262	164.809	61.2946	52.6386	55.5266	1.43583e-46	-1.40813	down	[H]	Coenzyme transport and metabolism	Molecular Function: nicotinate-nucleotide diphosphorylase (carboxylating) activity (GO:0004514);; Biological Process: NAD biosynthetic process (GO:0009435);;	K00767|1.1e-110|pavi:110765461|K00767 nicotinate-nucleotide pyrophosphorylase (carboxylating) [EC:2.4.2.19] | (RefSeq) nicotinate-nucleotide pyrophosphorylase [carboxylating], chloroplastic	Nicotinate and nicotinamide metabolism (ko00760)	[F]	Nucleotide transport and metabolism	Quinolinate phosphoribosyl transferase, N-terminal domain	Nicotinate-nucleotide pyrophosphorylase [carboxylating], chloroplastic OS=Arabidopsis thaliana OX=3702 GN=QPT PE=2 SV=2	F	Nucleotide transport and metabolism	unnamed protein product [Prunus armeniaca]
PaF106G0200008854.01	589	450	511	1259	780	1117	5.90759	5.40048	5.28501	13.7553	9.14186	11.2261	9.14931e-12	1.06656	up	[H]	Coenzyme transport and metabolism	Molecular Function: methyltransferase activity (GO:0008168);; Cellular Component: integral component of membrane (GO:0016021);; Biological Process: methylation (GO:0032259);;	K23872|2.6e-142|gra:105802655|K23872 putative homogalacturonan methyltransferase [EC:2.1.1.-] | (RefSeq) probable methyltransferase PMT13	--	--	--	Putative S-adenosyl-L-methionine-dependent methyltransferase	Probable methyltransferase PMT15 OS=Arabidopsis thaliana OX=3702 GN=At4g00750 PE=2 SV=1	S	Function unknown	unnamed protein product [Prunus armeniaca]
PaF106G0500019685.01	38	21	32	106	69	70	0.532548	0.521149	0.787217	1.82743	1.29366	1.20377	0.000189717	1.2091	up	[H]	Coenzyme transport and metabolism	Molecular Function: glutamate-cysteine ligase activity (GO:0004357);; Molecular Function: ATP binding (GO:0005524);; Biological Process: glutathione biosynthetic process (GO:0006750);; Cellular Component: chloroplast (GO:0009507);;	K01919|2.3e-287|pper:18777994|K01919 glutamate--cysteine ligase [EC:6.3.2.2] | (RefSeq) glutamate--cysteine ligase, chloroplastic	Cysteine and methionine metabolism (ko00270);; Glutathione metabolism (ko00480)	--	--	Glutamate-cysteine ligase family 2(GCS2)	Glutamate--cysteine ligase, chloroplastic OS=Nicotiana tabacum OX=4097 GN=GSH1 PE=2 SV=2	H	Coenzyme transport and metabolism	unnamed protein product [Prunus armeniaca]
PaF106G0400017290.01	162	99	118	20	25	8	2.10534	1.53916	1.57944	0.270558	0.379659	0.09282	3.90882e-10	-2.03608	down	[E]	Amino acid transport and metabolism	Biological Process: cellular amino acid metabolic process (GO:0006520);; Molecular Function: carboxy-lyase activity (GO:0016831);; Molecular Function: pyridoxal phosphate binding (GO:0030170);;	K01593|1.6e-307|pavi:110755508|K01593 aromatic-L-amino-acid/L-tryptophan decarboxylase [EC:4.1.1.28 4.1.1.105] | (RefSeq) tyrosine/DOPA decarboxylase 1-like	Tyrosine metabolism (ko00350);; Phenylalanine metabolism (ko00360);; Tryptophan metabolism (ko00380);; Isoquinoline alkaloid biosynthesis (ko00950);; Betalain biosynthesis (ko00965)	[E]	Amino acid transport and metabolism	Pyridoxal-dependent decarboxylase conserved domain	Phenylacetaldehyde synthase OS=Rosa hybrid cultivar OX=128735 GN=PAAS PE=1 SV=1	E	Amino acid transport and metabolism	unnamed protein product [Prunus armeniaca]
PaF106G0200008171.01	3	0	0	181	178	127	0.01894	0	0	1.78698	1.89952	1.16217	9.08198e-38	4.28174	up	[ET]	Amino acid transport and metabolism;; Signal transduction mechanisms	Cellular Component: plasma membrane (GO:0005886);; Molecular Function: ligand-gated ion channel activity (GO:0015276);; Cellular Component: integral component of membrane (GO:0016021);; Molecular Function: signaling receptor activity (GO:0038023);;	K05387|1.0e-238|pavi:110769760|K05387 glutamate receptor, ionotropic, plant | (RefSeq) glutamate receptor 1.4-like	--	[PET]	Inorganic ion transport and metabolism;; Amino acid transport and metabolism;; Signal transduction mechanisms	Ligand-gated ion channel	Glutamate receptor 1.4 OS=Arabidopsis thaliana OX=3702 GN=GLR1.4 PE=2 SV=2	--	--	unnamed protein product [Prunus armeniaca]
Prunus_sibirica_newGene_1780	531	400	397	1354	1242	1048	4.77169	4.22343	3.59741	13.3123	13.014	9.3541	2.72053e-21	1.49222	up	[V]	Defense mechanisms	Molecular Function: ATP binding (GO:0005524);; Cellular Component: plasma membrane (GO:0005886);; Cellular Component: integral component of membrane (GO:0016021);; Molecular Function: ATPase activity (GO:0016887);; Molecular Function: ATPase activity, coupled to transmembrane movement of substances (GO:0042626);; Biological Process: transmembrane transport (GO:0055085);;	K08712|1.1e-65|gsl:Gasu_29800|K08712 ATP-binding cassette, subfamily G (WHITE), member 2, SNQ2 | (RefSeq) ABC transporter, ATP-binding protein	ABC transporters (ko02010)	[Q]	Secondary metabolites biosynthesis, transport and catabolism	ABC transporter	Pleiotropic drug resistance protein 1 OS=Nicotiana tabacum OX=4097 GN=PDR1 PE=2 SV=1	Q	Secondary metabolites biosynthesis, transport and catabolism	PREDICTED: pleiotropic drug resistance protein 1-like [Prunus mume]
PaF106G0800031051.01	689	533	624	1032	1186	1375	7.99616	7.40191	7.47337	13.0405	16.0652	15.9831	3.09178e-19	1.02493	up	[G]	Carbohydrate transport and metabolism	Biological Process: lipid metabolic process (GO:0006629);; Molecular Function: phosphoric diester hydrolase activity (GO:0008081);;	--	--	--	--	--	PI-PLC X domain-containing protein At5g67130 OS=Arabidopsis thaliana OX=3702 GN=At5g67130 PE=1 SV=1	S	Function unknown	unnamed protein product [Prunus armeniaca]
PaF106G0700026433.01	392	361	202	108	126	159	6.75164	7.42527	3.57701	2.01875	2.51972	2.73141	1.4789e-05	-1.06997	down	[K]	Transcription	Molecular Function: GTPase activity (GO:0003924);; Molecular Function: GTP binding (GO:0005525);; Biological Process: small GTPase mediated signal transduction (GO:0007264);;	K04392|1.8e-116|pmum:103340893|K04392 Ras-related C3 botulinum toxin substrate 1 | (RefSeq) rac-like GTP-binding protein ARAC7	Phagosome (ko04145)	[R]	General function prediction only	Ras family	Rac-like GTP-binding protein ARAC7 OS=Arabidopsis thaliana OX=3702 GN=ARAC7 PE=1 SV=1	S	Function unknown	PREDICTED: rac-like GTP-binding protein ARAC7 [Prunus mume]
PaF106G0600024501.01	245	225	255	433	649	548	1.8934	1.84313	1.76898	3.17799	5.11438	3.70402	1.26723e-10	1.18607	up	[M]	Cell wall/membrane/envelope biogenesis	Molecular Function: protein serine/threonine kinase activity (GO:0004674);; Molecular Function: ATP binding (GO:0005524);; Cellular Component: integral component of membrane (GO:0016021);;	K20181|5.5e-110|mtr:MTR_5g026090|K20181 vacuolar protein sorting-associated protein 18 | (RefSeq) vacuolar sorting-associated-like protein	--	--	--	Protein kinase domain	Receptor kinase-like protein Xa21 OS=Oryza sativa subsp. indica OX=39946 GN=XA21 PE=1 SV=1	T	Signal transduction mechanisms	probable LRR receptor-like serine/threonine-protein kinase At3g47570 isoform X1 [Prunus avium]
PaF106G0400017978.01	51	13	29	98	103	115	0.40509	0.118269	0.241589	0.858665	0.96359	0.926923	7.31722e-06	1.45898	up	[T]	Signal transduction mechanisms	Molecular Function: protein serine/threonine kinase activity (GO:0004674);; Molecular Function: ATP binding (GO:0005524);; Cellular Component: plasma membrane (GO:0005886);; Biological Process: protein phosphorylation (GO:0006468);; Cellular Component: integral component of membrane (GO:0016021);; Biological Process: recognition of pollen (GO:0048544);;	K24104|1.4e-74|thj:104799061|K24104 GPN-loop GTPase | (RefSeq) LOW QUALITY PROTEIN: uncharacterized protein LOC104799061	--	--	--	Protein tyrosine and serine/threonine kinase	G-type lectin S-receptor-like serine/threonine-protein kinase At1g61500 OS=Arabidopsis thaliana OX=3702 GN=At1g61500 PE=2 SV=2	S	Function unknown	PREDICTED: G-type lectin S-receptor-like serine/threonine-protein kinase SD1-29 [Prunus mume]
PaF106G0700027781.01	974	722	961	2599	1964	2001	12.8702	11.4065	13.0898	37.3825	30.2959	26.4755	5.0449e-22	1.35753	up	[T]	Signal transduction mechanisms	Molecular Function: acid phosphatase activity (GO:0003993);; Molecular Function: metal ion binding (GO:0046872);;	K22390|5.4e-245|pmum:103339700|K22390 acid phosphatase type 7 | (RefSeq) purple acid phosphatase 22-like	--	[G]	Carbohydrate transport and metabolism	Purple acid Phosphatase, N-terminal domain	Purple acid phosphatase 22 OS=Arabidopsis thaliana OX=3702 GN=PAP22 PE=2 SV=1	G	Carbohydrate transport and metabolism	unnamed protein product [Prunus armeniaca]
PaF106G0600024632.01	25	28	22	104	107	158	0.233281	0.303235	0.211965	1.05945	1.165	1.47818	4.00137e-12	1.96353	up	[T]	Signal transduction mechanisms	Molecular Function: protein kinase activity (GO:0004672);; Molecular Function: ATP binding (GO:0005524);; Cellular Component: integral component of membrane (GO:0016021);; Molecular Function: carbohydrate binding (GO:0030246);;	K22133|2.3e-72|egr:104443803|K22133 oxalate---CoA ligase [EC:6.2.1.8] | (RefSeq) oxalate--CoA ligase isoform X2	Glyoxylate and dicarboxylate metabolism (ko00630)	--	--	Legume lectin domain	L-type lectin-domain containing receptor kinase IV.1 OS=Arabidopsis thaliana OX=3702 GN=LECRK41 PE=2 SV=1	T	Signal transduction mechanisms	PREDICTED: L-type lectin-domain containing receptor kinase IV.1-like [Prunus mume]
PaF106G0800032454.01	71	68	43	8	9	9	0.718534	0.81941	0.449696	0.078609	0.103262	0.090474	2.43821e-07	-1.84069	down	[R]	General function prediction only	Biological Process: signal transduction (GO:0007165);; Molecular Function: ADP binding (GO:0043531);;	K00695|8.0e-89|mtr:MTR_6g478030|K00695 sucrose synthase [EC:2.4.1.13] | (RefSeq) sucrose synthase	Starch and sucrose metabolism (ko00500)	--	--	NB-ARC domain	Disease resistance protein Roq1 OS=Nicotiana benthamiana OX=4100 GN=ROQ1 PE=1 SV=1	S	Function unknown	PREDICTED: TMV resistance protein N-like [Prunus mume]
PaF106G0100001674.01	1692	1014	1147	91	47	77	22.7619	16.5265	16.4132	1.46015	0.702796	0.94271	2.59647e-90	-3.77251	down	[G]	Carbohydrate transport and metabolism	Molecular Function: sugar:proton symporter activity (GO:0005351);; Cellular Component: integral component of plasma membrane (GO:0005887);; Biological Process: glucose import (GO:0046323);;	K03444|4.7e-280|pmum:103322904|K03444 MFS transporter, SP family, ERD6-like sugar transporter | (RefSeq) sugar transporter ERD6-like 16	--	[R]	General function prediction only	Sugar (and other) transporter	Sugar transporter ERD6-like 16 OS=Arabidopsis thaliana OX=3702 GN=At5g18840 PE=2 SV=2	U	Intracellular trafficking, secretion, and vesicular transport	unnamed protein product [Prunus armeniaca]
PaF106G0100002481.01	320	232	275	50	82	58	4.67053	4.04831	4.14707	0.781573	1.39144	0.83962	9.07665e-15	-1.79953	down	[R]	General function prediction only	Molecular Function: chitinase activity (GO:0004568);; Biological Process: carbohydrate metabolic process (GO:0005975);; Biological Process: chitin catabolic process (GO:0006032);; Biological Process: cell wall macromolecule catabolic process (GO:0016998);;	K01183|8.8e-136|pmum:103322431|K01183 chitinase [EC:3.2.1.14] | (RefSeq) endochitinase EP3-like	Amino sugar and nucleotide sugar metabolism (ko00520)	[R]	General function prediction only	Chitinase class I	Endochitinase EP3 OS=Arabidopsis thaliana OX=3702 GN=EP3 PE=1 SV=1	S	Function unknown	unnamed protein product [Prunus armeniaca]
PaF106G0800032117.01	281	252	269	97	115	110	6.10534	6.38656	6.01992	2.05584	2.78777	2.25152	6.03559e-09	-1.13942	down	[J]	Translation, ribosomal structure and biogenesis	--	--	--	--	--	Putative rRNA methylase	--	Q	Secondary metabolites biosynthesis, transport and catabolism	unnamed protein product [Prunus armeniaca]
PaF106G0200007390.01	493	423	502	170	199	211	2.15717	2.28175	2.31136	0.779435	1.01102	0.888456	1.82287e-13	-1.14721	down	[R]	General function prediction only	Molecular Function: ADP binding (GO:0043531);;	K12818|3.6e-164|mtr:MTR_0267s0070|K12818 ATP-dependent RNA helicase DHX8/PRP22 [EC:3.6.4.13] | (RefSeq) NB-ARC domain disease resistance protein, putative	Spliceosome (ko03040)	[T]	Signal transduction mechanisms	NB-ARC domain	Putative disease resistance RPP13-like protein 1 OS=Arabidopsis thaliana OX=3702 GN=RPPL1 PE=3 SV=1	T	Signal transduction mechanisms	PREDICTED: LOW QUALITY PROTEIN: putative disease resistance RPP13-like protein 1 [Prunus mume]
PaF106G0600025730.01	504	99	67	17	39	32	6.87408	1.61564	0.933742	0.252292	0.617759	0.434761	0.0096883	-1.0333	down	[P]	Inorganic ion transport and metabolism	Molecular Function: ammonium transmembrane transporter activity (GO:0008519);; Cellular Component: integral component of membrane (GO:0016021);;	K03320|1.2e-275|pper:18775204|K03320 ammonium transporter, Amt family | (RefSeq) ammonium transporter 1 member 2	--	[P]	Inorganic ion transport and metabolism	Ammonium Transporter Family	Ammonium transporter 1 member 2 OS=Arabidopsis thaliana OX=3702 GN=AMT1-2 PE=1 SV=1	P	Inorganic ion transport and metabolism	unnamed protein product [Prunus armeniaca]
PaF106G0400015437.01	98	32	67	224	300	316	0.407081	0.159499	0.290573	1.01501	1.52823	1.36949	3.75817e-13	1.90119	up	[V]	Defense mechanisms	Cellular Component: plant-type vacuole (GO:0000325);; Molecular Function: ATP binding (GO:0005524);; Cellular Component: vacuolar membrane (GO:0005774);; Cellular Component: membrane (GO:0016020);; Cellular Component: integral component of membrane (GO:0016021);; Molecular Function: ATPase activity (GO:0016887);; Molecular Function: ATPase activity, coupled to transmembrane movement of substances…	K05666|0.0e+00|mesc:110610975|K05666 ATP-binding cassette, subfamily C (CFTR/MRP), member 2 | (RefSeq) ABC transporter C family member 3-like	ABC transporters (ko02010)	[Q]	Secondary metabolites biosynthesis, transport and catabolism	ABC transporter	ABC transporter C family member 3 OS=Arabidopsis thaliana OX=3702 GN=ABCC3 PE=1 SV=1	Q	Secondary metabolites biosynthesis, transport and catabolism	unnamed protein product [Prunus armeniaca]
PaF106G0100001205.01	62	60	47	8	19	8	1.45614	1.67672	1.13411	0.190471	0.522901	0.179027	0.000113377	-1.42901	down	[F]	Nucleotide transport and metabolism	Biological Process: glutamine metabolic process (GO:0006541);;	K22314|1.2e-140|pmum:103323428|K22314 glucosinolate gamma-glutamyl hydrolase [EC:3.4.19.16] | (RefSeq) gamma-glutamyl peptidase 3-like	--	[F]	Nucleotide transport and metabolism	Glutamine amidotransferase class-I	Gamma-glutamyl peptidase 3 OS=Arabidopsis thaliana OX=3702 GN=GGP3 PE=1 SV=1	F	Nucleotide transport and metabolism	unnamed protein product [Prunus armeniaca]
PaF106G0400015265.01	12	30	18	42	64	87	0.217293	0.68097	0.340413	0.860005	1.4151	1.6627	0.00109781	1.19606	up	[Q]	Secondary metabolites biosynthesis, transport and catabolism	Molecular Function: oxidoreductase activity (GO:0016491);; Molecular Function: metal ion binding (GO:0046872);;	K14975|1.7e-58|psom:113311621|K14975 codeine 3-O-demethylase [EC:1.14.11.32] | (RefSeq) codeine O-demethylase	Isoquinoline alkaloid biosynthesis (ko00950)	[QR]	Secondary metabolites biosynthesis, transport and catabolism;; General function prediction only	non-haem dioxygenase in morphine synthesis N-terminal	Protein SRG1 OS=Arabidopsis thaliana OX=3702 GN=SRG1 PE=2 SV=1	Q	Secondary metabolites biosynthesis, transport and catabolism	unnamed protein product [Prunus armeniaca]
PaF106G0200010797.01	2753	2218	2511	6684	5257	5656	52.2544	50.3833	49.1652	138.083	116.486	107.496	7.53197e-33	1.30231	up	[S]	Function unknown	Cellular Component: integral component of membrane (GO:0016021);;	--	--	--	--	Protein of unknown function, DUF599	--	S	Function unknown	uncharacterized protein LOC117618567 [Prunus dulcis]
PaF106G0200007240.01	559	420	535	92	105	120	2.45569	2.20937	2.4251	0.439274	0.53509	0.526847	1.34937e-35	-2.05089	down	[R]	General function prediction only	Molecular Function: ADP binding (GO:0043531);;	K12818|8.6e-122|mtr:MTR_0267s0070|K12818 ATP-dependent RNA helicase DHX8/PRP22 [EC:3.6.4.13] | (RefSeq) NB-ARC domain disease resistance protein, putative	Spliceosome (ko03040)	[T]	Signal transduction mechanisms	NB-ARC domain	Putative disease resistance RPP13-like protein 1 OS=Arabidopsis thaliana OX=3702 GN=RPPL1 PE=3 SV=1	T	Signal transduction mechanisms	PREDICTED: LOW QUALITY PROTEIN: putative disease resistance RPP13-like protein 1 [Prunus mume]
PaF106G0800030531.01	81	64	100	18	16	54	1.57541	1.88155	1.72372	0.476878	0.446426	1.33396	0.00376071	-1.04062	down	[K]	Transcription	Molecular Function: O-methyltransferase activity (GO:0008171);; Molecular Function: S-adenosylmethionine-dependent methyltransferase activity (GO:0008757);; Biological Process: aromatic compound biosynthetic process (GO:0019438);; Biological Process: methylation (GO:0032259);; Molecular Function: protein dimerization activity (GO:0046983);;	K22588|1.4e-105|crb:17880076|K22588 acetylserotonin O-methyltransferase, plant [EC:2.1.1.4] | (RefSeq) xanthohumol 4'-O-methyltransferase	Tryptophan metabolism (ko00380)	[R]	General function prediction only	O-methyltransferase domain	Acetylserotonin O-methyltransferase OS=Arabidopsis thaliana OX=3702 GN=ASMT PE=1 SV=1	S	Function unknown	unnamed protein product [Prunus armeniaca]
PaF106G0400014797.01	59	53	53	201	265	221	0.736672	0.786477	0.680913	2.76246	3.90489	2.79103	8.06844e-17	1.92609	up	[E]	Amino acid transport and metabolism	Biological Process: amino acid transport (GO:0006865);; Cellular Component: integral component of membrane (GO:0016021);; Molecular Function: transmembrane transporter activity (GO:0022857);;	K19564|1.2e-49|qsu:111984493|K19564 choline transport protein | (RefSeq) choline transport protein-like	--	[E]	Amino acid transport and metabolism	Amino acid permease	Amino-acid permease BAT1 OS=Arabidopsis thaliana OX=3702 GN=BAT1 PE=2 SV=2	E	Amino acid transport and metabolism	unnamed protein product [Prunus armeniaca]
PaF106G0500019643.01	52	33	54	91	89	120	1.02537	0.781273	1.10501	1.96928	2.06714	2.38257	0.00032228	1.01869	up	[IQR]	Lipid transport and metabolism;; Secondary metabolites biosynthesis, transport and catabolism;; General function prediction only	Cellular Component: membrane (GO:0016020);; Biological Process: oxidation-reduction process (GO:0055114);;	K15095|7.0e-162|pmum:103337493|K15095 (+)-neomenthol dehydrogenase [EC:1.1.1.208] | (RefSeq) salutaridine reductase-like	Monoterpenoid biosynthesis (ko00902)	[Q]	Secondary metabolites biosynthesis, transport and catabolism	short chain dehydrogenase	Salutaridine reductase OS=Papaver bracteatum OX=215227 GN=SALR PE=1 SV=1	Q	Secondary metabolites biosynthesis, transport and catabolism	PREDICTED: salutaridine reductase-like [Prunus mume]
PaF106G0800032113.01	285	288	302	133	70	115	4.63371	5.60847	5.07782	2.36054	1.30761	1.86738	2.7e-08	-1.25203	down	[L]	Replication, recombination and repair	Molecular Function: DNA binding (GO:0003677);; Molecular Function: DNA-directed DNA polymerase activity (GO:0003887);; Biological Process: DNA-dependent DNA replication (GO:0006261);;	K02335|6.8e-12|cme:CYME_CMT462C|K02335 DNA polymerase I [EC:2.7.7.7] | (RefSeq) bacterial DNA polymerase I	DNA replication (ko03030);; Base excision repair (ko03410);; Nucleotide excision repair (ko03420);; Homologous recombination (ko03440)	--	--	5'-3' exonuclease, N-terminal resolvase-like domain	--	L	Replication, recombination and repair	PREDICTED: DNA polymerase I, thermostable [Prunus mume]
PaF106G0200009345.01	1755	1282	1649	412	436	433	24.2747	21.2265	23.5282	6.19922	7.04041	5.98917	4.39881e-49	-1.7254	down	[QR]	Secondary metabolites biosynthesis, transport and catabolism;; General function prediction only	Molecular Function: O-methyltransferase activity (GO:0008171);; Biological Process: methylation (GO:0032259);; Molecular Function: protein dimerization activity (GO:0046983);;	K13066|1.4e-167|pmum:103342359|K13066 caffeic acid 3-O-methyltransferase [EC:2.1.1.68] | (RefSeq) OMT1; uncharacterized protein LOC103342359	Phenylpropanoid biosynthesis (ko00940)	[R]	General function prediction only	O-methyltransferase domain	Caffeic acid 3-O-methyltransferase OS=Prunus dulcis OX=3755 GN=COMT1 PE=2 SV=1	--	--	unnamed protein product [Prunus armeniaca]
PaF106G0400017578.01	30	29	39	259	240	222	0.880374	0.99823	1.1329	8.3104	7.35934	6.55451	5.33655e-28	2.61971	up	[R]	General function prediction only	Biological Process: mitochondrial respiratory chain complex I assembly (GO:0032981);;	K03070|2.8e-26|pmum:103319773|K03070 preprotein translocase subunit SecA [EC:7.4.2.8] | (RefSeq) protein translocase subunit SECA2, chloroplastic	Protein export (ko03060)	[G]	Carbohydrate transport and metabolism	Complex I intermediate-associated protein 30 (CIA30)	Protein translocase subunit SECA2, chloroplastic OS=Arabidopsis thaliana OX=3702 GN=SECA2 PE=1 SV=1	G	Carbohydrate transport and metabolism	unnamed protein product [Prunus armeniaca]
PaF106G0700026418.01	1439	1058	1380	2225	2295	2896	29.1124	25.6153	28.7878	48.9878	54.1972	58.6686	7.38552e-25	1.00642	up	[HR]	Coenzyme transport and metabolism;; General function prediction only	Molecular Function: hydrolase activity (GO:0016787);;	--	--	--	--	alpha/beta hydrolase fold	Strigolactone esterase D14 OS=Oryza sativa subsp. japonica OX=39947 GN=D14 PE=1 SV=1	S	Function unknown	unnamed protein product [Prunus armeniaca]
PaF106G0100002800.01	30	17	35	123	45	95	0.401699	0.259347	0.476706	1.79385	0.697324	1.27023	0.000172445	1.30398	up	[QV]	Secondary metabolites biosynthesis, transport and catabolism;; Defense mechanisms	Molecular Function: monooxygenase activity (GO:0004497);; Molecular Function: iron ion binding (GO:0005506);; Cellular Component: integral component of membrane (GO:0016021);; Molecular Function: oxidoreductase activity, acting on paired donors, with incorporation or reduction of molecular oxygen (GO:0016705);; Molecular Function: heme binding (GO:0020037);;	K23810|3.3e-172|vvi:100232891|K23810 (E)-8-carboxylinalool synthase [EC:1.14.14.-] | (RefSeq) GFH2; ripening-related P-450 enzyme-like	Monoterpenoid biosynthesis (ko00902)	[Q]	Secondary metabolites biosynthesis, transport and catabolism	Cytochrome P450	Geraniol 8-hydroxylase OS=Catharanthus roseus OX=4058 GN=CYP76B6 PE=1 SV=1	Q	Secondary metabolites biosynthesis, transport and catabolism	PREDICTED: geraniol 8-hydroxylase-like [Prunus mume]
PaF106G0700027221.01	214	192	191	306	367	613	3.55543	3.81457	3.26056	5.53551	7.10334	10.1953	1.5025e-07	1.08016	up	[I]	Lipid transport and metabolism	Molecular Function: S-adenosylmethionine-dependent methyltransferase activity (GO:0008757);; Biological Process: methylation (GO:0032259);;	K21483|8.3e-90|bna:106358999|K21483 salicylate 1-O-methyltransferase [EC:2.1.1.274] | (RefSeq) salicylate carboxymethyltransferase-like	--	--	--	SAM dependent carboxyl methyltransferase	Jasmonate O-methyltransferase OS=Arabidopsis thaliana OX=3702 GN=JMT PE=1 SV=3	S	Function unknown	PREDICTED: jasmonate O-methyltransferase [Prunus mume]
PaF106G0300012363.01	81	53	46	13	28	21	1.09817	0.851622	0.638214	0.191762	0.444724	0.276415	0.00473324	-1.02539	down	[P]	Inorganic ion transport and metabolism	Molecular Function: zinc ion transmembrane transporter activity (GO:0005385);; Cellular Component: plasma membrane (GO:0005886);; Cellular Component: membrane (GO:0016020);; Cellular Component: integral component of membrane (GO:0016021);; Biological Process: zinc II ion transmembrane transport (GO:0071577);;	K14709|1.6e-189|pmum:103328994|K14709 solute carrier family 39 (zinc transporter), member 1/2/3 | (RefSeq) zinc transporter 8-like	--	[P]	Inorganic ion transport and metabolism	ZIP Zinc transporter	Zinc transporter 8 OS=Oryza sativa subsp. japonica OX=39947 GN=ZIP8 PE=2 SV=1	P	Inorganic ion transport and metabolism	unnamed protein product [Prunus armeniaca]
PaF106G0200009439.01	96	61	135	217	216	169	1.45684	1.10346	2.12805	3.6074	3.85955	2.58172	0.000221209	1.00203	up	[I]	Lipid transport and metabolism	Molecular Function: 3-hydroxyisobutyryl-CoA hydrolase activity (GO:0003860);; Biological Process: valine catabolic process (GO:0006574);;	K05605|1.9e-217|pmum:103332314|K05605 3-hydroxyisobutyryl-CoA hydrolase [EC:3.1.2.4] | (RefSeq) 3-hydroxyisobutyryl-CoA hydrolase 1-like	Valine, leucine and isoleucine degradation (ko00280);; beta-Alanine metabolism (ko00410);; Propanoate metabolism (ko00640);; Carbon metabolism (ko01200)	--	--	Enoyl-CoA hydratase/isomerase	3-hydroxyisobutyryl-CoA hydrolase 1 OS=Arabidopsis thaliana OX=3702 GN=CHY1 PE=1 SV=1	I	Lipid transport and metabolism	PREDICTED: 3-hydroxyisobutyryl-CoA hydrolase 1-like [Prunus mume]
PaF106G0100000568.01	157	152	213	657	581	570	2.82704	3.28044	3.97078	12.9357	12.2734	10.3194	7.86399e-24	1.77498	up	[R]	General function prediction only	Molecular Function: acid phosphatase activity (GO:0003993);;	K20728|1.5e-43|thj:104814965|K20728 vegetative storage protein 2 | (RefSeq) vegetative storage protein 2-like	MAPK signaling pathway - plant (ko04016)	--	--	HAD superfamily, subfamily IIIB (Acid phosphatase)	Acid phosphatase 1 OS=Solanum lycopersicum OX=4081 GN=APS1 PE=2 SV=1	S	Function unknown	unnamed protein product [Prunus armeniaca]
PaF106G0100004447.01	433	366	469	711	974	1121	7.63603	7.73347	8.51691	13.6981	20.128	19.8417	1.76901e-14	1.17725	up	[I]	Lipid transport and metabolism	Molecular Function: S-adenosylmethionine-dependent methyltransferase activity (GO:0008757);; Biological Process: methylation (GO:0032259);;	K08241|2.5e-209|pmum:103320875|K08241 jasmonate O-methyltransferase [EC:2.1.1.141] | (RefSeq) jasmonate O-methyltransferase-like	alpha-Linolenic acid metabolism (ko00592)	--	--	SAM dependent carboxyl methyltransferase	Jasmonate O-methyltransferase OS=Brassica rapa subsp. pekinensis OX=51351 GN=JMT PE=1 SV=1	S	Function unknown	PREDICTED: jasmonate O-methyltransferase-like [Prunus mume]
PaF106G0400015511.01	21	36	37	120	107	101	0.425295	0.912963	0.797923	2.75997	2.6449	2.12313	5.38869e-07	1.52156	up	[T]	Signal transduction mechanisms	Molecular Function: protein kinase activity (GO:0004672);; Molecular Function: ATP binding (GO:0005524);;	K08867|1.4e-170|pmum:103326634|K08867 WNK lysine deficient protein kinase [EC:2.7.11.1] | (RefSeq) probable serine/threonine-protein kinase WNK11	--	[R]	General function prediction only	Protein kinase domain	Probable serine/threonine-protein kinase WNK11 OS=Arabidopsis thaliana OX=3702 GN=WNK11 PE=2 SV=1	T	Signal transduction mechanisms	unnamed protein product [Prunus armeniaca]
PaF106G0200008357.01	26	12	23	172	159	163	0.154925	0.08375	0.138361	1.12104	1.11006	0.974214	4.58548e-22	2.61775	up	[R]	General function prediction only	Biological Process: signal transduction (GO:0007165);; Molecular Function: ADP binding (GO:0043531);;	K00695|2.9e-115|mtr:MTR_6g478030|K00695 sucrose synthase [EC:2.4.1.13] | (RefSeq) sucrose synthase	Starch and sucrose metabolism (ko00500)	--	--	TIR domain	Disease resistance protein RUN1 OS=Vitis rotundifolia OX=103349 GN=RUN1 PE=1 SV=1	S	Function unknown	TMV resistance protein N isoform X1 [Prunus persica]
PaF106G0300013674.01	229	122	151	5	26	18	1.36538	0.869799	0.926591	0.026119	0.174406	0.102399	7.68847e-14	-2.42025	down	[K]	Transcription	Biological Process: defense response (GO:0006952);; Molecular Function: ADP binding (GO:0043531);;	K15078|2.4e-106|tcc:18614561|K15078 structure-specific endonuclease subunit SLX1 [EC:3.6.1.-] | (RefSeq) putative disease resistance protein RGA3	--	[T]	Signal transduction mechanisms	NB-ARC domain	Putative disease resistance protein RGA3 OS=Solanum bulbocastanum OX=147425 GN=RGA3 PE=2 SV=2	T	Signal transduction mechanisms	unnamed protein product [Prunus armeniaca]
PaF106G0800029284.01	319	302	318	765	873	913	5.85255	6.63146	6.02153	15.3112	18.735	16.8076	6.65924e-30	1.48078	up	[J]	Translation, ribosomal structure and biogenesis	Molecular Function: rRNA (adenine-N6,N6-)-dimethyltransferase activity (GO:0000179);; Molecular Function: RNA binding (GO:0003723);; Biological Process: rRNA methylation (GO:0031167);;	K14191|1.8e-193|pper:18767770|K14191 18S rRNA (adenine1779-N6/adenine1780-N6)-dimethyltransferase [EC:2.1.1.183] | (RefSeq) ribosomal RNA small subunit methyltransferase	--	[A]	RNA processing and modification	Ribosomal RNA adenine dimethylase	Ribosomal RNA small subunit methyltransferase OS=Arabidopsis thaliana OX=3702 GN=DIM1A PE=1 SV=1	A	RNA processing and modification	unnamed protein product [Prunus armeniaca]
PaF106G0600024041.01	312	296	201	39	78	40	5.62729	6.38647	3.73242	0.761956	1.64355	0.706301	1.82644e-11	-1.88627	down	[G]	Carbohydrate transport and metabolism	Molecular Function: zinc ion binding (GO:0008270);; Biological Process: lignin biosynthetic process (GO:0009809);; Molecular Function: oxidoreductase activity, acting on the CH-OH group of donors, NAD or NADP as acceptor (GO:0016616);; Molecular Function: cinnamyl-alcohol dehydrogenase activity (GO:0045551);;	K23232|1.9e-158|nau:109215604|K23232 8-hydroxygeraniol dehydrogenase [EC:1.1.1.324] | (RefSeq) 8-hydroxygeraniol dehydrogenase-like	Monoterpenoid biosynthesis (ko00902)	[Q]	Secondary metabolites biosynthesis, transport and catabolism	Alcohol dehydrogenase GroES-like domain	Probable mannitol dehydrogenase OS=Fragaria ananassa OX=3747 GN=CAD PE=2 SV=1	Q	Secondary metabolites biosynthesis, transport and catabolism	PREDICTED: probable mannitol dehydrogenase isoform X1 [Prunus mume]
PaF106G0200009605.01	498	379	370	173	156	177	8.91596	7.67926	6.99579	3.2275	3.23978	3.17073	1.30326e-11	-1.14477	down	[J]	Translation, ribosomal structure and biogenesis	Molecular Function: RNA binding (GO:0003723);;	K12741|1.4e-17|ppp:112291379|K12741 heterogeneous nuclear ribonucleoprotein A1/A3 | (RefSeq) UBP1-associated protein 2C-like	Spliceosome (ko03040)	[R]	General function prediction only	RNA recognition motif. (a.k.a. RRM, RBD, or RNP domain)	Probable RNA-binding protein ARP1 OS=Arabidopsis thaliana OX=3702 GN=ARP1 PE=2 SV=1	A	RNA processing and modification	unnamed protein product [Prunus armeniaca]
PaF106G0300010966.01	257	226	179	561	446	399	3.44261	3.57471	2.45052	8.21386	7.03085	5.42855	7.42687e-08	1.09768	up	[T]	Signal transduction mechanisms	Molecular Function: protein serine/threonine kinase activity (GO:0004674);; Molecular Function: ATP binding (GO:0005524);;	K13430|9.4e-231|pmum:103330394|K13430 serine/threonine-protein kinase PBS1 [EC:2.7.11.1] | (RefSeq) serine/threonine-protein kinase PBS1	Plant-pathogen interaction (ko04626)	[T]	Signal transduction mechanisms	Protein kinase domain	Serine/threonine-protein kinase PBS1 OS=Arabidopsis thaliana OX=3702 GN=PBS1 PE=1 SV=1	T	Signal transduction mechanisms	unnamed protein product [Prunus armeniaca]
PaF106G0600024407.01	201	144	174	25	22	22	3.26364	2.79998	2.91398	0.428688	0.404389	0.358349	2.09802e-20	-2.4051	down	[P]	Inorganic ion transport and metabolism	Biological Process: response to reactive oxygen species (GO:0000302);; Molecular Function: peroxidase activity (GO:0004601);; Cellular Component: cytosol (GO:0005829);; Cellular Component: chloroplast (GO:0009507);; Molecular Function: heme binding (GO:0020037);; Biological Process: cellular response to oxidative stress (GO:0034599);; Biological Process: hydrogen peroxide catabolic process (GO:00…	K00434|4.9e-145|pper:18772001|K00434 L-ascorbate peroxidase [EC:1.11.1.11] | (RefSeq) L-ascorbate peroxidase 2, cytosolic	Ascorbate and aldarate metabolism (ko00053);; Glutathione metabolism (ko00480)	--	--	Peroxidase	L-ascorbate peroxidase 2, cytosolic OS=Arabidopsis thaliana OX=3702 GN=APX2 PE=2 SV=3	C	Energy production and conversion	unnamed protein product [Prunus armeniaca]
PaF106G0600022226.01	165	175	178	67	16	43	1.68965	2.13951	1.87906	0.736682	0.185319	0.437032	1.27585e-06	-1.54088	down	[DPM]	Cell cycle control, cell division, chromosome partitioning;; Inorganic ion transport and metabolism;; Cell wall/membrane/envelope biogenesis	Molecular Function: copper ion binding (GO:0005507);; Biological Process: response to water deprivation (GO:0009414);; Biological Process: lignin catabolic process (GO:0046274);; Cellular Component: apoplast (GO:0048046);; Molecular Function: hydroquinone:oxygen oxidoreductase activity (GO:0052716);;	K05909|2.0e-187|pper:18772760|K05909 laccase [EC:1.10.3.2] | (RefSeq) laccase-2	--	[Q]	Secondary metabolites biosynthesis, transport and catabolism	Multicopper oxidase	Laccase-2 OS=Arabidopsis thaliana OX=3702 GN=LAC2 PE=2 SV=1	Q	Secondary metabolites biosynthesis, transport and catabolism	laccase-2 [Prunus dulcis]
PaF106G0100001357.01	2064	1953	2359	5478	4213	4280	31.487	35.6682	37.1061	90.957	75.0386	65.3692	2.27923e-19	1.18786	up	[IR]	Lipid transport and metabolism;; General function prediction only	Molecular Function: hydrolase activity, acting on ester bonds (GO:0016788);;	K00679|1.6e-51|cic:CICLE_v10027727mg|K00679 phospholipid:diacylglycerol acyltransferase [EC:2.3.1.158] | (RefSeq) hypothetical protein	Glycerolipid metabolism (ko00561)	--	--	GDSL-like Lipase/Acylhydrolase	GDSL esterase/lipase At4g16230 OS=Arabidopsis thaliana OX=3702 GN=At4g16230 PE=3 SV=2	I	Lipid transport and metabolism	PREDICTED: GDSL esterase/lipase At4g16230-like [Prunus mume]
PaF106G0100005227.01	140	169	150	20	58	34	1.4992	2.1574	1.65753	0.229548	0.719143	0.361125	1.06621e-06	-1.5339	down	[Q]	Secondary metabolites biosynthesis, transport and catabolism	Cellular Component: chloroplast (GO:0009507);; Cellular Component: chloroplast stroma (GO:0009570);; Molecular Function: carotenoid dioxygenase activity (GO:0010436);; Biological Process: carotene catabolic process (GO:0016121);; Molecular Function: metal ion binding (GO:0046872);;	K00465|5.8e-54|hbr:110643097|K00465 carotenoid 9,10(9',10')-cleavage dioxygenase 1 [EC:1.13.11.-] | (RefSeq) carotenoid 9,10(9',10')-cleavage dioxygenase 1-like	--	[Q]	Secondary metabolites biosynthesis, transport and catabolism	Retinal pigment epithelial membrane protein	Carotenoid 9,10(9',10')-cleavage dioxygenase 1 OS=Pisum sativum OX=3888 GN=CCD1 PE=2 SV=1	Q	Secondary metabolites biosynthesis, transport and catabolism	unnamed protein product [Prunus armeniaca]
PaF106G0300012543.01	102	88	91	428	410	371	1.46581	1.50892	1.35045	6.72146	6.89476	5.35679	4.73944e-28	2.05414	up	[QV]	Secondary metabolites biosynthesis, transport and catabolism;; Defense mechanisms	Molecular Function: monooxygenase activity (GO:0004497);; Molecular Function: iron ion binding (GO:0005506);; Cellular Component: integral component of membrane (GO:0016021);; Molecular Function: oxidoreductase activity, acting on paired donors, with incorporation or reduction of molecular oxygen (GO:0016705);; Molecular Function: heme binding (GO:0020037);;	K07437|1.3e-274|pmum:103328825|K07437 cytochrome P450 family 26 subfamily A | (RefSeq) taxadiene 5-alpha hydroxylase	--	[QI]	Secondary metabolites biosynthesis, transport and catabolism;; Lipid transport and metabolism	Cytochrome P450	Taxadiene 5-alpha hydroxylase OS=Taxus cuspidata OX=99806 PE=1 SV=2	Q	Secondary metabolites biosynthesis, transport and catabolism	PREDICTED: taxadiene 5-alpha hydroxylase [Prunus mume]
PaF106G0100003953.01	195	230	250	92	71	116	2.1372	3.02261	2.83726	1.10027	0.900696	1.27473	2.19313e-06	-1.09085	down	[R]	General function prediction only	Molecular Function: protein binding (GO:0005515);;	K12116|0.0e+00|pper:18788531|K12116 flavin-binding kelch repeat F-box protein 1 | (RefSeq) adagio protein 3	Circadian rhythm - plant (ko04712)	--	--	Galactose oxidase, central domain	Adagio protein 3 OS=Arabidopsis thaliana OX=3702 GN=ADO3 PE=1 SV=1	T	Signal transduction mechanisms	unnamed protein product [Prunus armeniaca]
PaF106G0200007072.01	460	348	424	738	729	997	2.62864	1.63102	1.72373	5.64013	3.33505	3.93819	6.53684e-17	1.05261	up	[R]	General function prediction only	Biological Process: defense response (GO:0006952);; Molecular Function: ADP binding (GO:0043531);;	K12818|1.9e-158|mtr:MTR_0267s0070|K12818 ATP-dependent RNA helicase DHX8/PRP22 [EC:3.6.4.13] | (RefSeq) NB-ARC domain disease resistance protein, putative	Spliceosome (ko03040)	[T]	Signal transduction mechanisms	NB-ARC domain	Putative disease resistance RPP13-like protein 1 OS=Arabidopsis thaliana OX=3702 GN=RPPL1 PE=3 SV=1	T	Signal transduction mechanisms	putative disease resistance RPP13-like protein 1 [Prunus dulcis]
Prunus_sibirica_newGene_1975	187	207	250	485	495	617	1.9114	2.23872	2.31779	7.90381	9.25751	10.1501	1.39486e-15	1.31691	up	[R]	General function prediction only	Biological Process: signal transduction (GO:0007165);; Molecular Function: ADP binding (GO:0043531);;	K00695|3.8e-47|mtr:MTR_6g478030|K00695 sucrose synthase [EC:2.4.1.13] | (RefSeq) sucrose synthase	Starch and sucrose metabolism (ko00500)	--	--	NB-ARC domain	Disease resistance protein RPV1 OS=Vitis rotundifolia OX=103349 GN=RPV1 PE=1 SV=1	T	Signal transduction mechanisms	TMV resistance protein N isoform X2 [Prunus persica]
PaF106G0800030449.01	93	88	97	232	290	324	0.482718	0.546267	0.52161	1.32044	1.76863	1.69636	3.98662e-15	1.56191	up	[R]	General function prediction only	Biological Process: signal transduction (GO:0007165);; Molecular Function: ADP binding (GO:0043531);;	K00695|1.3e-103|mtr:MTR_6g478030|K00695 sucrose synthase [EC:2.4.1.13] | (RefSeq) sucrose synthase	Starch and sucrose metabolism (ko00500)	--	--	TIR domain	TMV resistance protein N OS=Nicotiana glutinosa OX=35889 GN=N PE=1 SV=1	T	Signal transduction mechanisms	PREDICTED: disease resistance protein TAO1-like isoform X1 [Prunus mume]
PaF106G0800030767.01	303	227	285	779	741	983	4.37349	3.92534	4.24346	12.252	12.4833	14.2189	2.84055e-39	1.65362	up	[G]	Carbohydrate transport and metabolism	Molecular Function: UDP-glycosyltransferase activity (GO:0008194);; Cellular Component: intracellular membrane-bounded organelle (GO:0043231);; Molecular Function: quercetin 3-O-glucosyltransferase activity (GO:0080043);; Molecular Function: quercetin 7-O-glucosyltransferase activity (GO:0080044);;	K13691|3.4e-261|pmum:103335041|K13691 pathogen-inducible salicylic acid glucosyltransferase [EC:2.4.1.-] | (RefSeq) UDP-glycosyltransferase 74G1-like	--	[GC]	Carbohydrate transport and metabolism;; Energy production and conversion	UDP-glucoronosyl and UDP-glucosyl transferase	UDP-glycosyltransferase 74G1 OS=Stevia rebaudiana OX=55670 GN=UGT74G1 PE=1 SV=1	--	--	PREDICTED: UDP-glycosyltransferase 74G1-like [Prunus mume]
PaF106G0600023946.01	33	31	33	91	110	99	0.264731	0.3003	0.268642	0.823122	1.06174	0.820485	5.54235e-07	1.43677	up	[R]	General function prediction only	Biological Process: defense response (GO:0006952);; Molecular Function: ADP binding (GO:0043531);;	K13457|0.0e+00|pmum:103334422|K13457 disease resistance protein RPM1 | (RefSeq) disease resistance protein RPM1-like	Plant-pathogen interaction (ko04626)	[T]	Signal transduction mechanisms	NB-ARC domain	Disease resistance protein RPM1 OS=Arabidopsis thaliana OX=3702 GN=RPM1 PE=1 SV=1	T	Signal transduction mechanisms	PREDICTED: disease resistance protein RPM1-like [Prunus mume]
PaF106G0200007851.01	33	49	33	87	80	91	0.418011	0.749893	0.427156	1.20867	1.18748	1.1617	0.00117108	1.00645	up	[J]	Translation, ribosomal structure and biogenesis	Molecular Function: nucleic acid binding (GO:0003676);; Molecular Function: helicase activity (GO:0004386);; Molecular Function: ATP binding (GO:0005524);;	K12818|1.2e-121|pavi:110750032|K12818 ATP-dependent RNA helicase DHX8/PRP22 [EC:3.6.4.13] | (RefSeq) probable pre-mRNA-splicing factor ATP-dependent RNA helicase DEAH5	Spliceosome (ko03040)	[A]	RNA processing and modification	Helicase associated domain (HA2)	Probable pre-mRNA-splicing factor ATP-dependent RNA helicase DEAH5 OS=Arabidopsis thaliana OX=3702 GN=At3g26560 PE=1 SV=2	A	RNA processing and modification	probable pre-mRNA-splicing factor ATP-dependent RNA helicase DEAH5 [Prunus dulcis]
PaF106G0200007136.01	508	321	382	110	82	90	3.86421	2.92385	2.99836	0.906145	0.725007	0.68523	1.19555e-20	-1.84553	down	[T]	Signal transduction mechanisms	Molecular Function: solute:proton antiporter activity (GO:0015299);; Cellular Component: integral component of membrane (GO:0016021);;	--	--	[P]	Inorganic ion transport and metabolism	Sodium/hydrogen exchanger family	Cation/H(+) antiporter 15 OS=Arabidopsis thaliana OX=3702 GN=CHX15 PE=2 SV=1	P	Inorganic ion transport and metabolism	unnamed protein product [Prunus armeniaca]
PaF106G0500019921.01	1418	1305	1593	2746	2950	3265	17.738	19.984	20.6791	37.3893	43.2068	40.9744	2.66739e-30	1.12064	up	[M]	Cell wall/membrane/envelope biogenesis	Molecular Function: RNA binding (GO:0003723);; Molecular Function: UDP-glucose 4-epimerase activity (GO:0003978);; Cellular Component: cytosol (GO:0005829);; Biological Process: galactose metabolic process (GO:0006012);; Biological Process: rRNA processing (GO:0006364);;	K01784|7.2e-203|pmum:103337743|K01784 UDP-glucose 4-epimerase [EC:5.1.3.2] | (RefSeq) UDP-glucose 4-epimerase GEPI48	Galactose metabolism (ko00052);; Amino sugar and nucleotide sugar metabolism (ko00520)	[M]	Cell wall/membrane/envelope biogenesis	GDP-mannose 4,6 dehydratase	UDP-glucose 4-epimerase GEPI48 OS=Cyamopsis tetragonoloba OX=3832 PE=2 SV=1	M	Cell wall/membrane/envelope biogenesis	unnamed protein product [Prunus armeniaca]
PaF106G0800031219.01	1630	1570	1749	2931	2852	3713	24.7529	29.3035	27.6375	49.0896	50.1528	57.4577	1.33605e-27	1.00222	up	[O]	Posttranslational modification, protein turnover, chaperones	Molecular Function: peptidyl-prolyl cis-trans isomerase activity (GO:0003755);; Biological Process: protein folding (GO:0006457);;	K05864|5.1e-148|pmum:103335411|K05864 peptidyl-prolyl isomerase D [EC:5.2.1.8] | (RefSeq) peptidyl-prolyl cis-trans isomerase CYP40	--	[O]	Posttranslational modification, protein turnover, chaperones	Cyclophilin type peptidyl-prolyl cis-trans isomerase/CLD	Peptidyl-prolyl cis-trans isomerase CYP40 OS=Arabidopsis thaliana OX=3702 GN=CYP40 PE=2 SV=1	O	Posttranslational modification, protein turnover, chaperones	unnamed protein product [Prunus armeniaca]
PaF106G0300012162.01	14458	10367	12508	26071	23372	22817	204.955	175.881	182.909	402.263	386.758	323.85	7.43608e-23	1.03702	up	[G]	Carbohydrate transport and metabolism	Molecular Function: polygalacturonase activity (GO:0004650);; Cellular Component: extracellular region (GO:0005576);; Biological Process: carbohydrate metabolic process (GO:0005975);; Biological Process: cell wall organization (GO:0071555);;	K01213|6.1e-230|pmum:103343817|K01213 galacturan 1,4-alpha-galacturonidase [EC:3.2.1.67] | (RefSeq) exopolygalacturonase-like	Pentose and glucuronate interconversions (ko00040)	--	--	Glycosyl hydrolases family 28	Exopolygalacturonase (Fragment) OS=Oenothera organensis OX=3945 PE=2 SV=1	G	Carbohydrate transport and metabolism	PREDICTED: exopolygalacturonase-like [Prunus mume]
PaF106G0400015116.01	993	809	861	351	423	441	17.4587	17.0247	15.6124	6.7162	8.67887	7.75718	3.94054e-15	-1.00964	down	[F]	Nucleotide transport and metabolism	Cellular Component: peroxisome (GO:0005777);; Cellular Component: plasma membrane (GO:0005886);; Molecular Function: hydrolase activity, acting on glycosyl bonds (GO:0016798);;	K16329|4.2e-187|pmum:103326776|K16329 pseudouridylate synthase [EC:4.2.1.70] | (RefSeq) pseudouridine-5'-phosphate glycosidase isoform X1	Pyrimidine metabolism (ko00240)	[R]	General function prediction only	Indigoidine synthase A like protein	--	Q	Secondary metabolites biosynthesis, transport and catabolism	PREDICTED: pseudouridine-5'-phosphate glycosidase isoform X1 [Prunus mume]
PaF106G0800032257.01	116	123	214	28	36	45	1.42874	1.82031	2.72462	0.367986	0.507606	0.548227	4.14762e-08	-1.61941	down	[DPM]	Cell cycle control, cell division, chromosome partitioning;; Inorganic ion transport and metabolism;; Cell wall/membrane/envelope biogenesis	Molecular Function: ferroxidase activity (GO:0004322);; Molecular Function: copper ion binding (GO:0005507);; Cellular Component: plasma membrane (GO:0005886);; Biological Process: iron ion transport (GO:0006826);; Biological Process: lignin catabolic process (GO:0046274);; Cellular Component: apoplast (GO:0048046);; Molecular Function: hydroquinone:oxygen oxidoreductase activity (GO:0052716);; B…	K05909|3.9e-173|pmum:103343162|K05909 laccase [EC:1.10.3.2] | (RefSeq) putative laccase-9	--	[Q]	Secondary metabolites biosynthesis, transport and catabolism	Multicopper oxidase	Laccase-14 OS=Arabidopsis thaliana OX=3702 GN=LAC14 PE=2 SV=1	Q	Secondary metabolites biosynthesis, transport and catabolism	unnamed protein product [Prunus armeniaca]
PaF106G0400016721.01	20	22	18	135	87	153	0.228328	0.293212	0.205042	1.70385	1.18125	1.78005	5.788e-14	2.19854	up	[DPM]	Cell cycle control, cell division, chromosome partitioning;; Inorganic ion transport and metabolism;; Cell wall/membrane/envelope biogenesis	Molecular Function: copper ion binding (GO:0005507);; Cellular Component: extracellular region (GO:0005576);; Molecular Function: oxidoreductase activity (GO:0016491);;	K00423|2.6e-184|mus:103969432|K00423 L-ascorbate oxidase [EC:1.10.3.3] | (RefSeq) L-ascorbate oxidase	Ascorbate and aldarate metabolism (ko00053)	[Q]	Secondary metabolites biosynthesis, transport and catabolism	Multicopper oxidase	L-ascorbate oxidase OS=Cucumis sativus OX=3659 PE=1 SV=1	Q	Secondary metabolites biosynthesis, transport and catabolism	unnamed protein product [Prunus armeniaca]
PaF106G0500020358.01	311	259	278	1140	1046	1133	5.10418	4.92185	4.59198	18.7532	18.7623	17.3713	2.77279e-63	2.00559	up	[L]	Replication, recombination and repair	Molecular Function: nuclease activity (GO:0004518);; Molecular Function: protein kinase activity (GO:0004672);; Biological Process: DNA repair (GO:0006281);; Molecular Function: metal ion binding (GO:0046872);; Molecular Function: class I DNA-(apurinic or apyrimidinic site) lyase activity (GO:0140078);;	K01142|9.8e-18|brp:103866025|K01142 exodeoxyribonuclease III [EC:3.1.11.2] | (RefSeq) DNA-(apurinic or apyrimidinic site) lyase, chloroplastic	Base excision repair (ko03410)	[L]	Replication, recombination and repair	Endonuclease/Exonuclease/phosphatase family	DNA-(apurinic or apyrimidinic site) endonuclease OS=Arabidopsis thaliana OX=3702 GN=APE1L PE=1 SV=1	L	Replication, recombination and repair	unnamed protein product [Prunus armeniaca]
PaF106G0100001977.01	1404	952	1395	473	555	658	28.3678	23.031	29.0815	10.3933	13.0868	13.3024	9.94907e-14	-1.02387	down	[G]	Carbohydrate transport and metabolism	Molecular Function: hydrolase activity, hydrolyzing O-glycosyl compounds (GO:0004553);; Cellular Component: cell wall (GO:0005618);; Biological Process: xyloglucan metabolic process (GO:0010411);; Molecular Function: xyloglucan:xyloglucosyl transferase activity (GO:0016762);; Biological Process: cell wall biogenesis (GO:0042546);; Cellular Component: apoplast (GO:0048046);; Biological Process: ce…	K08235|1.4e-164|pmum:103322621|K08235 xyloglucan:xyloglucosyl transferase [EC:2.4.1.207] | (RefSeq) xyloglucan endotransglucosylase/hydrolase 2-like	--	--	--	Glycosyl hydrolases family 16	Xyloglucan endotransglucosylase/hydrolase 2 OS=Glycine max OX=3847 PE=2 SV=1	G	Carbohydrate transport and metabolism	unnamed protein product [Prunus armeniaca]
PaF106G0300012392.01	251	190	171	1400	918	1111	3.39777	3.06562	2.37917	20.634	14.5042	15.0576	3.07087e-46	2.43569	up	[QV]	Secondary metabolites biosynthesis, transport and catabolism;; Defense mechanisms	Molecular Function: iron ion binding (GO:0005506);; Cellular Component: membrane (GO:0016020);; Molecular Function: oxidoreductase activity, acting on paired donors, with incorporation or reduction of molecular oxygen, NAD(P)H as one donor, and incorporation of one atom of oxygen (GO:0016709);; Molecular Function: heme binding (GO:0020037);;	K00495|2.8e-240|pmum:103337951|K00495 phenylacetaldehyde oxime monooxygenase [EC:1.14.14.44] | (RefSeq) cytochrome P450 71A1-like	Cyanoamino acid metabolism (ko00460)	[Q]	Secondary metabolites biosynthesis, transport and catabolism	Cytochrome P450	Phenylacetaldehyde oxime monooxygenase CYP71AN24 OS=Prunus mume OX=102107 GN=CYP71AN24 PE=1 SV=1	Q	Secondary metabolites biosynthesis, transport and catabolism	PREDICTED: cytochrome P450 71A1-like [Prunus mume]
PaF106G0800030730.01	1174	1350	1232	2597	3280	3506	49.8106	68.5306	53.9351	119.938	162.476	148.975	6.65649e-25	1.35235	up	[S]	Function unknown	Cellular Component: extracellular space (GO:0005615);;	K13449|1.6e-91|pmum:103334946|K13449 pathogenesis-related protein 1 | (RefSeq) pathogenesis-related protein 1A-like	MAPK signaling pathway - plant (ko04016);; Plant hormone signal transduction (ko04075);; Plant-pathogen interaction (ko04626)	[S]	Function unknown	Cysteine-rich secretory protein family	--	S	Function unknown	PREDICTED: pathogenesis-related protein 1A-like [Prunus mume]
PaF106G0600022161.01	478	266	474	24	15	26	7.39084	4.91579	7.55891	0.397867	0.265695	0.391986	2.10075e-48	-3.57829	down	[G]	Carbohydrate transport and metabolism	Molecular Function: UDP-glycosyltransferase activity (GO:0008194);; Cellular Component: intracellular membrane-bounded organelle (GO:0043231);; Molecular Function: quercetin 3-O-glucosyltransferase activity (GO:0080043);; Molecular Function: quercetin 7-O-glucosyltransferase activity (GO:0080044);;	K13493|1.7e-108|eus:EUTSA_v10013500mg|K13493 cytokinin-N-glucosyltransferase [EC:2.4.1.-] | (RefSeq) hypothetical protein	Zeatin biosynthesis (ko00908)	[GC]	Carbohydrate transport and metabolism;; Energy production and conversion	UDP-glucoronosyl and UDP-glucosyl transferase	UDP-glucose iridoid glucosyltransferase OS=Catharanthus roseus OX=4058 GN=UGT76A2 PE=1 SV=1	--	--	unnamed protein product [Prunus armeniaca]
PaF106G0700027850.01	240	229	285	7	22	20	11.4738	13.1498	14.0935	0.32742	1.21271	0.960613	1.55825e-32	-3.21083	down	[O]	Posttranslational modification, protein turnover, chaperones	Molecular Function: ATP binding (GO:0005524);; Cellular Component: cytoplasm (GO:0005737);; Biological Process: response to unfolded protein (GO:0006986);; Molecular Function: ATPase activity (GO:0016887);; Molecular Function: heat shock protein binding (GO:0031072);; Biological Process: cellular response to unfolded protein (GO:0034620);; Biological Process: protein refolding (GO:0042026);; Mole…	K03283|1.5e-66|pmum:103341778|K03283 heat shock 70kDa protein 1/2/6/8 | (RefSeq) heat shock cognate 70 kDa protein-like	Spliceosome (ko03040);; Protein processing in endoplasmic reticulum (ko04141);; Endocytosis (ko04144)	[O]	Posttranslational modification, protein turnover, chaperones	Hsp70 protein	Heat shock 70 kDa protein 4 OS=Arabidopsis thaliana OX=3702 GN=HSP70-4 PE=1 SV=1	O	Posttranslational modification, protein turnover, chaperones	heat shock cognate 70 kDa protein-like [Prunus dulcis]
PaF106G0600024842.01	68	66	36	174	143	135	0.620246	0.7235	0.33774	1.74628	1.53924	1.24153	7.82634e-06	1.26709	up	[GHR]	Carbohydrate transport and metabolism;; Coenzyme transport and metabolism;; General function prediction only	Molecular Function: magnesium ion binding (GO:0000287);; Molecular Function: carboxy-lyase activity (GO:0016831);; Molecular Function: thiamine pyrophosphate binding (GO:0030976);;	K01568|1.1e-73|fve:101303820|K01568 pyruvate decarboxylase [EC:4.1.1.1] | (RefSeq) pyruvate decarboxylase 2	Glycolysis / Gluconeogenesis (ko00010)	[EH]	Amino acid transport and metabolism;; Coenzyme transport and metabolism	Thiamine pyrophosphate enzyme, C-terminal TPP binding domain	Pyruvate decarboxylase 2 (Fragment) OS=Pisum sativum OX=3888 GN=PDC2 PE=2 SV=1	--	--	PREDICTED: pyruvate decarboxylase 2 [Fragaria vesca subsp. vesca]
PaF106G0100001224.01	33	19	29	171	210	247	0.359362	0.250527	0.324916	2.06223	2.71957	2.7358	1.90812e-26	2.64541	up	[D]	Cell cycle control, cell division, chromosome partitioning	Molecular Function: 5'-nucleotidase activity (GO:0008253);; Molecular Function: metal ion binding (GO:0046872);;	K01081|3.6e-48|gsl:Gasu_60230|K01081 5'-nucleotidase [EC:3.1.3.5] | (RefSeq) 5' nucleotidase family protein	Purine metabolism (ko00230);; Pyrimidine metabolism (ko00240);; Nicotinate and nicotinamide metabolism (ko00760)	[F]	Nucleotide transport and metabolism	5' nucleotidase family	--	F	Nucleotide transport and metabolism	PREDICTED: cytosolic purine 5'-nucleotidase-like [Prunus mume]
PaF106G0400015685.01	55	39	49	8	18	10	1.43842	0.873824	0.925096	0.142436	0.349647	0.159657	0.00087705	-1.24531	down	[M]	Cell wall/membrane/envelope biogenesis	Molecular Function: ATP binding (GO:0005524);; Cellular Component: mitochondrion (GO:0005739);; Molecular Function: tetraacyldisaccharide 4'-kinase activity (GO:0009029);; Biological Process: lipid A biosynthetic process (GO:0009245);; Biological Process: lipid X metabolic process (GO:2001289);;	K00912|1.2e-121|pavi:110762235|K00912 tetraacyldisaccharide 4'-kinase [EC:2.7.1.130] | (RefSeq) probable tetraacyldisaccharide 4'-kinase, mitochondrial	--	--	--	Tetraacyldisaccharide-1-P 4'-kinase	Probable tetraacyldisaccharide 4'-kinase, mitochondrial OS=Arabidopsis thaliana OX=3702 GN=LPXK PE=2 SV=1	G	Carbohydrate transport and metabolism	probable tetraacyldisaccharide 4'-kinase, mitochondrial [Prunus avium]
PaF106G0800030114.01	58	20	42	199	162	287	1.06828	0.428733	0.785361	3.99592	3.49098	5.31315	4.60906e-15	2.13258	up	[R]	General function prediction only	Molecular Function: protein binding (GO:0005515);; Cellular Component: cellular_component (GO:0005575);; Cellular Component: intracellular (GO:0005622);; Cellular Component: cell (GO:0005623);; Cellular Component: nucleus (GO:0005634);; Cellular Component: nucleoplasm (GO:0005654);; Biological Process: regulation of carbohydrate metabolic process (GO:0006109);; Biological Process: regulation of s…	K14152|3.0e-70|cpep:111783531|K14152 phosphoribosyl-ATP pyrophosphohydrolase / phosphoribosyl-AMP cyclohydrolase / histidinol dehydrogenase [EC:3.6.1.31 3.5.4.19 1.1.1.23] | (RefSeq) uncharacterized protein LOC111783531	Histidine metabolism (ko00340);; Biosynthesis of amino acids (ko01230)	--	--	Tetratricopeptide repeat	Protein SULFUR DEFICIENCY-INDUCED 1 OS=Arabidopsis thaliana OX=3702 GN=SDI1 PE=2 SV=1	S	Function unknown	unnamed protein product [Prunus armeniaca]
PaF106G0600022158.01	614	397	468	96	99	184	7.76236	5.99883	6.098	1.31554	1.45583	2.32136	1.56174e-17	-1.73675	down	[G]	Carbohydrate transport and metabolism	Molecular Function: UDP-glycosyltransferase activity (GO:0008194);; Cellular Component: intracellular membrane-bounded organelle (GO:0043231);; Molecular Function: quercetin 3-O-glucosyltransferase activity (GO:0080043);; Molecular Function: quercetin 7-O-glucosyltransferase activity (GO:0080044);;	K13493|5.4e-110|brp:103846928|K13493 cytokinin-N-glucosyltransferase [EC:2.4.1.-] | (RefSeq) UDP-glycosyltransferase 76C2	Zeatin biosynthesis (ko00908)	[GC]	Carbohydrate transport and metabolism;; Energy production and conversion	UDP-glucoronosyl and UDP-glucosyl transferase	UDP-glucose iridoid glucosyltransferase OS=Catharanthus roseus OX=4058 GN=UGT76A2 PE=1 SV=1	--	--	PREDICTED: UDP-glycosyltransferase 76E2-like isoform X1 [Prunus mume]
PaF106G0700027963.01	48	50	42	106	122	87	1.19933	1.49722	1.06782	2.8906	3.57274	2.17667	0.000329725	1.05844	up	[R]	General function prediction only	Biological Process: cytokinin biosynthetic process (GO:0009691);; Molecular Function: hydrolase activity (GO:0016787);;	K22522|7.4e-89|pmum:103341706|K22522 cytokinin riboside 5'-monophosphate phosphoribohydrolase [EC:3.2.2.-] | (RefSeq) cytokinin riboside 5'-monophosphate phosphoribohydrolase LOG7	--	--	--	Possible lysine decarboxylase	Cytokinin riboside 5'-monophosphate phosphoribohydrolase LOG7 OS=Arabidopsis thaliana OX=3702 GN=LOG7 PE=1 SV=2	G	Carbohydrate transport and metabolism	PREDICTED: cytokinin riboside 5'-monophosphate phosphoribohydrolase LOG7 [Prunus mume]
PaF106G0100002422.01	18	25	19	52	98	114	0.119316	0.191573	0.129579	0.425478	0.761285	0.762751	1.24014e-06	1.61647	up	[T]	Signal transduction mechanisms	Molecular Function: protein serine/threonine kinase activity (GO:0004674);; Molecular Function: ATP binding (GO:0005524);; Cellular Component: integral component of membrane (GO:0016021);;	K20181|8.2e-101|mtr:MTR_5g026090|K20181 vacuolar protein sorting-associated protein 18 | (RefSeq) vacuolar sorting-associated-like protein	--	--	--	Protein tyrosine and serine/threonine kinase	Putative receptor-like protein kinase At3g47110 OS=Arabidopsis thaliana OX=3702 GN=At3g47110 PE=3 SV=1	T	Signal transduction mechanisms	PREDICTED: probable LRR receptor-like serine/threonine-protein kinase At3g47570 [Prunus mume]
PaF106G0600025487.01	2161	1735	1841	686	845	988	17.3539	17.0175	15.6639	5.88229	7.71438	7.77204	6.59638e-21	-1.07466	down	[F]	Nucleotide transport and metabolism	--	--	--	[F]	Nucleotide transport and metabolism	Inosine-uridine preferring nucleoside hydrolase	--	F	Nucleotide transport and metabolism	unnamed protein product [Prunus armeniaca]
PaF106G0200009421.01	2492	2347	2545	994	1005	1135	17.4989	19.6103	18.4477	7.71778	8.26935	8.05022	1.83143e-35	-1.13377	down	[G]	Carbohydrate transport and metabolism	Biological Process: carbohydrate metabolic process (GO:0005975);; Molecular Function: pullulanase activity (GO:0051060);;	K01214|7.4e-27|smo:SELMODRAFT_106218|K01214 isoamylase [EC:3.2.1.68] | (RefSeq) hypothetical protein	Starch and sucrose metabolism (ko00500)	[G]	Carbohydrate transport and metabolism	Pullulanase N2 domain	Pullulanase 1, chloroplastic OS=Arabidopsis thaliana OX=3702 GN=PU1 PE=1 SV=2	G	Carbohydrate transport and metabolism	unnamed protein product [Prunus armeniaca]
PaF106G0800029996.01	1358	1060	1008	3748	2956	3131	7.63764	7.17371	5.80019	22.5119	19.1402	17.0808	5.83664e-35	1.57119	up	[V]	Defense mechanisms	Molecular Function: ATP binding (GO:0005524);; Cellular Component: plasma membrane (GO:0005886);; Cellular Component: integral component of membrane (GO:0016021);; Molecular Function: ATPase activity (GO:0016887);; Molecular Function: ATPase activity, coupled to transmembrane movement of substances (GO:0042626);; Biological Process: transmembrane transport (GO:0055085);;	K08712|9.9e-139|gsl:Gasu_29800|K08712 ATP-binding cassette, subfamily G (WHITE), member 2, SNQ2 | (RefSeq) ABC transporter, ATP-binding protein	ABC transporters (ko02010)	[Q]	Secondary metabolites biosynthesis, transport and catabolism	ABC-2 type transporter	Pleiotropic drug resistance protein 1 OS=Nicotiana tabacum OX=4097 GN=PDR1 PE=2 SV=1	Q	Secondary metabolites biosynthesis, transport and catabolism	pleiotropic drug resistance protein 1 isoform X2 [Prunus persica]
PaF106G0800030915.01	15	19	13	49	66	53	0.146613	0.179743	0.122778	0.434828	0.634165	0.431244	8.25279e-05	1.38397	up	[T]	Signal transduction mechanisms	Molecular Function: protein kinase activity (GO:0004672);; Molecular Function: ATP binding (GO:0005524);; Cellular Component: integral component of membrane (GO:0016021);;	K20181|4.4e-103|mtr:MTR_5g026090|K20181 vacuolar protein sorting-associated protein 18 | (RefSeq) vacuolar sorting-associated-like protein	--	--	--	Protein tyrosine and serine/threonine kinase	Probable LRR receptor-like serine/threonine-protein kinase At3g47570 OS=Arabidopsis thaliana OX=3702 GN=At3g47570 PE=2 SV=1	--	--	PREDICTED: probable LRR receptor-like serine/threonine-protein kinase At3g47570 [Prunus mume]
PaF106G0200009348.01	32	33	32	109	113	126	0.577826	0.709176	0.589503	2.17244	2.42741	2.31471	1.34571e-09	1.64097	up	[K]	Transcription	Molecular Function: O-methyltransferase activity (GO:0008171);; Biological Process: methylation (GO:0032259);; Molecular Function: protein dimerization activity (GO:0046983);;	K13066|9.8e-214|pmum:103342357|K13066 caffeic acid 3-O-methyltransferase [EC:2.1.1.68] | (RefSeq) caffeic acid 3-O-methyltransferase-like	Phenylpropanoid biosynthesis (ko00940)	[R]	General function prediction only	O-methyltransferase domain	Caffeic acid 3-O-methyltransferase OS=Catharanthus roseus OX=4058 GN=COMT1 PE=2 SV=1	--	--	unnamed protein product [Prunus armeniaca]
PaF106G0300011417.01	413	358	296	139	156	145	3.15761	3.2735	2.32782	1.15222	1.38756	1.10324	1.36928e-08	-1.10307	down	[T]	Signal transduction mechanisms	Molecular Function: RNA binding (GO:0003723);; Molecular Function: metal ion binding (GO:0046872);;	K14411|1.8e-10|mus:104000436|K14411 RNA-binding protein Musashi | (RefSeq) heterogeneous nuclear ribonucleoprotein 1-like	mRNA surveillance pathway (ko03015)	[R]	General function prediction only	Ankyrin repeats (3 copies)	Heterogeneous nuclear ribonucleoprotein 1 OS=Arabidopsis thaliana OX=3702 GN=RNP1 PE=1 SV=1	S	Function unknown	unnamed protein product [Prunus armeniaca]
PaF106G0100005060.01	22	16	27	464	419	539	0.191568	0.168071	0.244773	4.53436	4.38915	4.84629	2.34475e-84	4.09699	up	[O]	Posttranslational modification, protein turnover, chaperones	Molecular Function: serine-type endopeptidase activity (GO:0004252);; Cellular Component: extracellular space (GO:0005615);;	K13124|6.3e-11|lsv:111889439|K13124 mitogen-activated protein kinase organizer 1 | (RefSeq) uncharacterized WD repeat-containing protein C713.05-like	--	--	--	Subtilase family	Subtilisin-like protease SBT3 OS=Solanum lycopersicum OX=4081 GN=sbt3 PE=1 SV=1	O	Posttranslational modification, protein turnover, chaperones	hypothetical protein PRUPE_1G433200 [Prunus persica]
PaF106G0800030499.01	286	225	181	474	523	583	2.36599	2.22133	1.55428	4.34814	5.17372	4.99866	1.35346e-12	1.21245	up	[R]	General function prediction only	Biological Process: signal transduction (GO:0007165);; Molecular Function: ADP binding (GO:0043531);;	K00695|6.8e-108|mtr:MTR_6g478030|K00695 sucrose synthase [EC:2.4.1.13] | (RefSeq) sucrose synthase	Starch and sucrose metabolism (ko00500)	--	--	TIR domain	TMV resistance protein N OS=Nicotiana glutinosa OX=35889 GN=N PE=1 SV=1	G	Carbohydrate transport and metabolism	PREDICTED: TMV resistance protein N-like [Prunus mume]
PaF106G0800031137.01	291	189	217	87	70	119	5.58368	4.341	4.28471	1.80109	1.55952	2.28766	3.73509e-07	-1.13647	down	[I]	Lipid transport and metabolism	Molecular Function: hydrolase activity (GO:0016787);;	K20506|7.4e-87|egu:105060863|K20506 tuliposide A-converting enzyme [EC:4.2.99.22] | (RefSeq) tuliposide A-converting enzyme 2, chloroplastic-like	--	[V]	Defense mechanisms	alpha/beta hydrolase fold	Probable carboxylesterase 12 OS=Arabidopsis thaliana OX=3702 GN=CXE12 PE=1 SV=1	V	Defense mechanisms	PREDICTED: probable carboxylesterase 12 [Prunus mume]
PaF106G0400018230.01	4392	3897	4875	8100	8523	9937	51.7812	54.539	58.8782	106.545	119.744	119.149	1.89243e-36	1.08344	up	[EH]	Amino acid transport and metabolism;; Coenzyme transport and metabolism	Molecular Function: oxidoreductase activity, acting on a sulfur group of donors, disulfide as acceptor (GO:0016671);; Biological Process: sulfate reduction (GO:0019419);;	K05907|3.2e-214|pmum:103324413|K05907 adenylyl-sulfate reductase (glutathione) [EC:1.8.4.9] | (RefSeq) 5'-adenylylsulfate reductase 3, chloroplastic-like	Sulfur metabolism (ko00920)	[E]	Amino acid transport and metabolism	Phosphoadenosine phosphosulfate reductase family	5'-adenylylsulfate reductase 3, chloroplastic OS=Arabidopsis thaliana OX=3702 GN=APR3 PE=2 SV=2	--	--	unnamed protein product [Prunus armeniaca]
PaF106G0800031130.01	49	25	10	70	107	87	0.849617	0.508522	0.16316	1.3242	2.1731	1.51348	0.000581387	1.24535	up	[I]	Lipid transport and metabolism	Biological Process: catabolic process (GO:0009056);; Molecular Function: hydrolase activity (GO:0016787);;	K20506|7.2e-86|egu:105060863|K20506 tuliposide A-converting enzyme [EC:4.2.99.22] | (RefSeq) tuliposide A-converting enzyme 2, chloroplastic-like	--	[V]	Defense mechanisms	alpha/beta hydrolase fold	Probable carboxylesterase 12 OS=Arabidopsis thaliana OX=3702 GN=CXE12 PE=1 SV=1	V	Defense mechanisms	PREDICTED: probable carboxylesterase 12 [Prunus mume]
PaF106G0100004010.01	215	80	172	258	326	385	3.30152	1.46957	2.71522	4.31287	5.84666	5.91581	4.2653e-05	1.02906	up	[Q]	Secondary metabolites biosynthesis, transport and catabolism	Molecular Function: D-galacturonate reductase activity (GO:0102098);;	K19642|3.9e-179|pmum:103320996|K19642 D-galacturonate reductase [EC:1.1.1.365] | (RefSeq) D-galacturonate reductase-like	Ascorbate and aldarate metabolism (ko00053)	[R]	General function prediction only	Aldo/keto reductase family	D-galacturonate reductase OS=Fragaria ananassa OX=3747 GN=GALUR PE=1 SV=1	S	Function unknown	unnamed protein product [Prunus armeniaca]
PaF106G0800031288.01	451	304	344	120	84	113	2.79437	2.25317	2.19534	0.809342	0.60147	0.695677	3.40038e-16	-1.57742	down	[R]	General function prediction only	Biological Process: signal transduction (GO:0007165);; Cellular Component: integral component of membrane (GO:0016021);; Molecular Function: ADP binding (GO:0043531);;	K00695|2.0e-174|mtr:MTR_6g478030|K00695 sucrose synthase [EC:2.4.1.13] | (RefSeq) sucrose synthase	Starch and sucrose metabolism (ko00500)	--	--	TIR domain	TMV resistance protein N OS=Nicotiana glutinosa OX=35889 GN=N PE=1 SV=1	T	Signal transduction mechanisms	TMV resistance protein N-like, partial [Prunus avium]
PaF106G0400016135.01	178	147	166	5	14	14	2.66733	2.62131	2.55895	0.066944	0.236047	0.206482	2.25321e-25	-3.03111	down	[W]	Extracellular structures	Molecular Function: protein kinase activity (GO:0004672);; Molecular Function: ATP binding (GO:0005524);; Molecular Function: carbohydrate binding (GO:0030246);;	K22133|4.5e-49|egr:104443803|K22133 oxalate---CoA ligase [EC:6.2.1.8] | (RefSeq) oxalate--CoA ligase isoform X2	Glyoxylate and dicarboxylate metabolism (ko00630)	--	--	Protein kinase domain	L-type lectin-domain containing receptor kinase IX.1 OS=Arabidopsis thaliana OX=3702 GN=LECRK91 PE=1 SV=1	T	Signal transduction mechanisms	L-type lectin-domain containing receptor kinase IX.1-like [Prunus avium]
PaF106G0100006700.01	5447	3988	5019	8847	7682	11264	68.2582	59.7681	64.9614	120.1	111.85	140.623	2.21611e-27	1.01079	up	[QV]	Secondary metabolites biosynthesis, transport and catabolism;; Defense mechanisms	Molecular Function: iron ion binding (GO:0005506);; Cellular Component: membrane (GO:0016020);; Molecular Function: oxidoreductase activity, acting on paired donors, with incorporation or reduction of molecular oxygen, NAD(P)H as one donor, and incorporation of one atom of oxygen (GO:0016709);; Molecular Function: heme binding (GO:0020037);;	K09754|4.7e-296|pmum:103319006|K09754 5-O-(4-coumaroyl)-D-quinate 3'-monooxygenase [EC:1.14.14.96] | (RefSeq) cytochrome P450 98A2-like	Phenylpropanoid biosynthesis (ko00940);; Flavonoid biosynthesis (ko00941);; Stilbenoid, diarylheptanoid and gingerol biosynthesis (ko00945)	[Q]	Secondary metabolites biosynthesis, transport and catabolism	Cytochrome P450	Cytochrome P450 98A2 OS=Glycine max OX=3847 GN=CYP98A2 PE=2 SV=1	Q	Secondary metabolites biosynthesis, transport and catabolism	unnamed protein product [Prunus armeniaca]
PaF106G0300012164.01	11510	6594	7937	1390	1213	1407	86.0517	58.9966	61.21	11.3062	10.578	10.5277	2.06522e-89	-2.51411	down	[G]	Carbohydrate transport and metabolism	Molecular Function: polygalacturonase activity (GO:0004650);; Cellular Component: extracellular region (GO:0005576);; Biological Process: carbohydrate metabolic process (GO:0005975);; Biological Process: cell wall organization (GO:0071555);;	K01213|3.9e-232|pmum:103343818|K01213 galacturan 1,4-alpha-galacturonidase [EC:3.2.1.67] | (RefSeq) exopolygalacturonase clone GBGA483-like	Pentose and glucuronate interconversions (ko00040)	--	--	Glycosyl hydrolases family 28	Exopolygalacturonase clone GBGA483 OS=Arabidopsis thaliana OX=3702 GN=At3g07850 PE=2 SV=2	G	Carbohydrate transport and metabolism	PREDICTED: exopolygalacturonase clone GBGA483-like [Prunus mume]
PaF106G0800031512.01	80	60	47	0	0	0	1.16112	1.03432	0.702264	0	0	0	1.79925e-16	-3.05206	down	[T]	Signal transduction mechanisms	Molecular Function: acid phosphatase activity (GO:0003993);; Molecular Function: metal ion binding (GO:0046872);;	K22390|2.9e-279|pmum:103335712|K22390 acid phosphatase type 7 | (RefSeq) purple acid phosphatase-like	--	[G]	Carbohydrate transport and metabolism	Calcineurin-like phosphoesterase	Purple acid phosphatase OS=Glycine max OX=3847 GN=PAP PE=1 SV=2	G	Carbohydrate transport and metabolism	PREDICTED: purple acid phosphatase-like [Prunus mume]
PaF106G0400016192.01	10	10	13	46	39	57	0.04212	0.052463	0.061355	0.233408	0.20911	0.264068	2.83996e-05	1.50441	up	[ET]	Amino acid transport and metabolism;; Signal transduction mechanisms	Cellular Component: plasma membrane (GO:0005886);; Molecular Function: ligand-gated ion channel activity (GO:0015276);; Cellular Component: integral component of membrane (GO:0016021);; Molecular Function: signaling receptor activity (GO:0038023);;	K05387|7.0e-145|egu:105039729|K05387 glutamate receptor, ionotropic, plant | (RefSeq) glutamate receptor 2.8-like	--	[PET]	Inorganic ion transport and metabolism;; Amino acid transport and metabolism;; Signal transduction mechanisms	Receptor family ligand binding region	Glutamate receptor 2.9 OS=Arabidopsis thaliana OX=3702 GN=GLR2.9 PE=2 SV=1	--	--	hypothetical protein PRUPE_4G171700 [Prunus persica]
PaF106G0100002453.01	2241	1796	1911	3837	3721	3938	16.3605	15.6713	14.1305	31.78	33.1421	29.9666	3.0915e-32	1.03107	up	[L]	Replication, recombination and repair	Molecular Function: helicase activity (GO:0004386);;	K10706|1.5e-256|vvi:100262126|K10706 senataxin [EC:3.6.4.-] | (RefSeq) uncharacterized LOC100262126	--	[A]	RNA processing and modification	AAA domain	--	A	RNA processing and modification	PREDICTED: uncharacterized protein LOC103322333 [Prunus mume]
PaF106G0100006479.01	332	328	286	97	102	120	5.12743	10.3508	9.0442	0.533762	1.42956	1.28029	3.33358e-13	-1.38719	down	[R]	General function prediction only	Biological Process: signal transduction (GO:0007165);; Molecular Function: ADP binding (GO:0043531);;	K00695|1.4e-135|mtr:MTR_6g478030|K00695 sucrose synthase [EC:2.4.1.13] | (RefSeq) sucrose synthase	Starch and sucrose metabolism (ko00500)	--	--	TIR domain	Disease resistance protein RPV1 OS=Vitis rotundifolia OX=103349 GN=RPV1 PE=1 SV=1	T	Signal transduction mechanisms	LOW QUALITY PROTEIN: disease resistance protein RPV1-like [Prunus dulcis]
PaF106G0800032573.01	65	57	59	242	176	232	0.972167	1.0827	0.919368	4.48139	3.27611	3.73951	3.49202e-15	1.74498	up	[P]	Inorganic ion transport and metabolism	Molecular Function: carbonate dehydratase activity (GO:0004089);; Molecular Function: zinc ion binding (GO:0008270);; Biological Process: cyanate catabolic process (GO:0009440);; Biological Process: carbon utilization (GO:0015976);;	K01673|2.9e-145|pmum:103341853|K01673 carbonic anhydrase [EC:4.2.1.1] | (RefSeq) carbonic anhydrase 2-like	Nitrogen metabolism (ko00910)	[P]	Inorganic ion transport and metabolism	Carbonic anhydrase	Carbonic anhydrase, chloroplastic OS=Nicotiana tabacum OX=4097 PE=2 SV=1	P	Inorganic ion transport and metabolism	PREDICTED: carbonic anhydrase 2-like [Prunus mume]
PaF106G0600025342.01	0	0	0	68	69	60	0	0	0	0.836427	0.919181	0.677196	1.20907e-19	3.31067	up	[GI]	Carbohydrate transport and metabolism;; Lipid transport and metabolism	Cellular Component: extracellular region (GO:0005576);; Cellular Component: cell wall (GO:0005618);; Cellular Component: integral component of membrane (GO:0016021);; Molecular Function: pectinesterase activity (GO:0030599);; Biological Process: cell wall modification (GO:0042545);; Molecular Function: aspartyl esterase activity (GO:0045330);; Biological Process: pectin catabolic process (GO:0045…	K01051|0.0e+00|pmum:103344536|K01051 pectinesterase [EC:3.1.1.11] | (RefSeq) putative pectinesterase/pectinesterase inhibitor 28	Pentose and glucuronate interconversions (ko00040)	--	--	Pectinesterase	Putative pectinesterase/pectinesterase inhibitor 28 OS=Arabidopsis thaliana OX=3702 GN=PME28 PE=2 SV=1	G	Carbohydrate transport and metabolism	unnamed protein product [Prunus armeniaca]
PaF106G0400016106.01	16	17	18	320	317	360	0.377883	0.486161	0.4382	8.54097	9.04492	8.82683	1.84663e-62	3.8509	up	[C]	Energy production and conversion	Molecular Function: nucleotide binding (GO:0000166);; Molecular Function: succinate-CoA ligase (ADP-forming) activity (GO:0004775);; Cellular Component: mitochondrion (GO:0005739);; Biological Process: tricarboxylic acid cycle (GO:0006099);;	K01899|3.7e-43|csv:101206269|K01899 succinyl-CoA synthetase alpha subunit [EC:6.2.1.4 6.2.1.5] | (RefSeq) succinate--CoA ligase [ADP-forming] subunit alpha, mitochondrial	Citrate cycle (TCA cycle) (ko00020);; Propanoate metabolism (ko00640);; Carbon metabolism (ko01200)	[C]	Energy production and conversion	CoA binding domain	Succinate--CoA ligase [ADP-forming] subunit alpha, mitochondrial OS=Oryza sativa subsp. japonica OX=39947 GN=Os07g0577700 PE=1 SV=1	C	Energy production and conversion	hypothetical protein FNV43_RR21107 [Rhamnella rubrinervis]
PaF106G0500018993.01	1028	904	1000	2876	1892	2133	16.4093	17.2695	16.4654	49.9573	35.2453	34.0924	4.83572e-18	1.2768	up	[O]	Posttranslational modification, protein turnover, chaperones	Molecular Function: cysteine-type peptidase activity (GO:0008234);;	K16290|3.7e-56|smo:SELMODRAFT_184826|K16290 xylem cysteine proteinase [EC:3.4.22.-] | (RefSeq) hypothetical protein	--	[O]	Posttranslational modification, protein turnover, chaperones	Papain family cysteine protease	Fruit bromelain OS=Ananas comosus OX=4615 PE=1 SV=1	O	Posttranslational modification, protein turnover, chaperones	unnamed protein product [Prunus armeniaca]
PaF106G0600022958.01	9592	7784	9945	4361	3789	4403	166.211	161.435	177.761	82.2423	76.6439	76.3927	5.41533e-32	-1.01538	down	[I]	Lipid transport and metabolism	Molecular Function: hydrolase activity (GO:0016787);;	K02952|1.1e-06|aip:107648613|K02952 small subunit ribosomal protein S13 | (RefSeq) 30S ribosomal protein S13, chloroplastic-like	Ribosome (ko03010)	--	--	Serine aminopeptidase, S33	--	S	Function unknown	PREDICTED: uncharacterized protein LOC103327901 [Prunus mume]
PaF106G0200007742.01	258	292	302	667	559	729	4.61771	6.24738	5.48608	12.8496	11.6531	13.1268	5.57602e-16	1.22076	up	[O]	Posttranslational modification, protein turnover, chaperones	Molecular Function: ATP binding (GO:0005524);; Molecular Function: ATPase activity (GO:0016887);;	K09013|2.7e-186|pmum:103331015|K09013 Fe-S cluster assembly ATP-binding protein | (RefSeq) ABC transporter I family member 6, chloroplastic	--	--	--	ABC transporter	ABC transporter I family member 6, chloroplastic OS=Arabidopsis thaliana OX=3702 GN=ABCI6 PE=1 SV=1	L	Replication, recombination and repair	PREDICTED: ABC transporter I family member 6, chloroplastic [Prunus mume]
PaF106G0700028562.01	107	88	112	180	224	302	0.941922	0.924336	1.01707	1.73062	2.31443	2.72145	7.70227e-08	1.16833	up	[K]	Transcription	Molecular Function: ribonuclease III activity (GO:0004525);; Biological Process: RNA processing (GO:0006396);; Biological Process: gene silencing by RNA (GO:0031047);;	K11592|0.0e+00|pavi:110770284|K11592 endoribonuclease Dicer [EC:3.1.26.-] | (RefSeq) endoribonuclease Dicer homolog 2-like isoform X1	--	[A]	RNA processing and modification	Ribonuclease III domain	Endoribonuclease Dicer homolog 2 OS=Arabidopsis thaliana OX=3702 GN=At3g03300 PE=1 SV=2	A	RNA processing and modification	endoribonuclease Dicer homolog 2-like isoform X1 [Prunus avium]
PaF106G0700028478.01	15	0	19	209	170	247	0.082964	0	0.107206	1.29501	1.14267	1.40448	0.00583971	1.02778	up	[P]	Inorganic ion transport and metabolism	Molecular Function: calcium-transporting ATPase activity (GO:0005388);; Molecular Function: ATP binding (GO:0005524);; Cellular Component: integral component of membrane (GO:0016021);;	K01537|0.0e+00|pavi:110773092|K01537 P-type Ca2+ transporter type 2C [EC:7.2.2.10] | (RefSeq) putative calcium-transporting ATPase 11, plasma membrane-type isoform X1	--	[P]	Inorganic ion transport and metabolism	Cation transporting ATPase, C-terminus	Putative calcium-transporting ATPase 11, plasma membrane-type OS=Arabidopsis thaliana OX=3702 GN=ACA11 PE=1 SV=1	P	Inorganic ion transport and metabolism	unnamed protein product [Prunus armeniaca]
PaF106G0300011189.01	575	499	721	1348	1403	1779	4.43468	4.60952	5.73507	11.3181	12.6383	13.748	2.43584e-26	1.37431	up	[G]	Carbohydrate transport and metabolism	Biological Process: response to acid chemical (GO:0001101);; Molecular Function: molecular_function (GO:0003674);; Molecular Function: catalytic activity (GO:0003824);; Cellular Component: cellular_component (GO:0005575);; Cellular Component: intracellular (GO:0005622);; Cellular Component: cell (GO:0005623);; Cellular Component: cytoplasm (GO:0005737);; Biological Process: response to stress (GO…	K06617|0.0e+00|pmum:103329815|K06617 raffinose synthase [EC:2.4.1.82] | (RefSeq) probable galactinol--sucrose galactosyltransferase 5	Galactose metabolism (ko00052)	--	--	Raffinose synthase or seed imbibition protein Sip1	Probable galactinol--sucrose galactosyltransferase 5 OS=Arabidopsis thaliana OX=3702 GN=RFS5 PE=1 SV=1	S	Function unknown	unnamed protein product [Prunus armeniaca]
PaF106G0400015835.01	25	8	25	42	117	117	0.467138	0.16599	0.48077	0.876213	2.64428	2.25873	7.66898e-06	1.61231	up	[M]	Cell wall/membrane/envelope biogenesis	Molecular Function: catalytic activity (GO:0003824);;	K13082|2.7e-74|mesc:110605890|K13082 bifunctional dihydroflavonol 4-reductase/flavanone 4-reductase [EC:1.1.1.219 1.1.1.234] | (RefSeq) dihydroflavonol 4-reductase-like	Flavonoid biosynthesis (ko00941)	[V]	Defense mechanisms	NAD dependent epimerase/dehydratase family	Putative anthocyanidin reductase OS=Ginkgo biloba OX=3311 PE=2 SV=1	V	Defense mechanisms	unnamed protein product [Prunus armeniaca]
PaF106G0100001225.01	38	40	45	127	230	169	0.195199	0.393594	0.234028	0.718172	1.36742	0.880118	3.50438e-11	1.84183	up	[V]	Defense mechanisms	Molecular Function: ATP binding (GO:0005524);; Cellular Component: integral component of membrane (GO:0016021);; Molecular Function: ATPase activity (GO:0016887);; Molecular Function: ATPase activity, coupled to transmembrane movement of substances (GO:0042626);; Biological Process: transmembrane transport (GO:0055085);;	K05658|0.0e+00|pper:18789915|K05658 ATP-binding cassette, subfamily B (MDR/TAP), member 1 [EC:7.6.2.2] | (RefSeq) ABC transporter B family member 11	ABC transporters (ko02010)	[Q]	Secondary metabolites biosynthesis, transport and catabolism	ABC transporter	ABC transporter B family member 11 OS=Arabidopsis thaliana OX=3702 GN=ABCB11 PE=2 SV=1	Q	Secondary metabolites biosynthesis, transport and catabolism	unnamed protein product [Prunus armeniaca]
PaF106G0600023187.01	271	199	245	605	403	490	4.81443	4.22165	4.47525	11.6902	8.34534	8.71307	1.12409e-09	1.09627	up	[I]	Lipid transport and metabolism	Molecular Function: hydrolase activity (GO:0016787);;	K20506|1.5e-43|egu:105060863|K20506 tuliposide A-converting enzyme [EC:4.2.99.22] | (RefSeq) tuliposide A-converting enzyme 2, chloroplastic-like	--	[V]	Defense mechanisms	alpha/beta hydrolase fold	Probable carboxylesterase 15 OS=Arabidopsis thaliana OX=3702 GN=CXE15 PE=2 SV=1	V	Defense mechanisms	unnamed protein product [Prunus armeniaca]
PaF106G0700027477.01	266	216	173	561	586	697	2.36517	2.2958	1.61462	5.42619	6.12039	6.22678	8.40574e-21	1.50317	up	[T]	Signal transduction mechanisms	Molecular Function: protein kinase activity (GO:0004672);; Molecular Function: ATP binding (GO:0005524);; Cellular Component: integral component of membrane (GO:0016021);;	K03283|2.7e-138|pmum:103341774|K03283 heat shock 70kDa protein 1/2/6/8 | (RefSeq) heat shock 70 kDa protein 18-like	Spliceosome (ko03040);; Protein processing in endoplasmic reticulum (ko04141);; Endocytosis (ko04144)	[T]	Signal transduction mechanisms	Arabidopsis broad-spectrum mildew resistance protein RPW8	Probable serine/threonine-protein kinase PIX13 OS=Arabidopsis thaliana OX=3702 GN=PIX13 PE=1 SV=2	T	Signal transduction mechanisms	uncharacterized protein LOC18769185 isoform X2 [Prunus persica]
PaF106G0800030520.01	46	54	32	180	181	213	0.570264	0.90524	0.410498	2.46461	2.66752	2.69018	1.20928e-14	1.92035	up	[QR]	Secondary metabolites biosynthesis, transport and catabolism;; General function prediction only	Molecular Function: O-methyltransferase activity (GO:0008171);; Molecular Function: S-adenosylmethionine-dependent methyltransferase activity (GO:0008757);; Biological Process: aromatic compound biosynthetic process (GO:0019438);; Biological Process: methylation (GO:0032259);; Molecular Function: protein dimerization activity (GO:0046983);;	K22588|5.8e-99|crb:17880076|K22588 acetylserotonin O-methyltransferase, plant [EC:2.1.1.4] | (RefSeq) xanthohumol 4'-O-methyltransferase	Tryptophan metabolism (ko00380)	[R]	General function prediction only	O-methyltransferase domain	Acetylserotonin O-methyltransferase OS=Arabidopsis thaliana OX=3702 GN=ASMT PE=1 SV=1	S	Function unknown	PREDICTED: 3'-hydroxy-N-methyl-(S)-coclaurine 4'-O-methyltransferase 2-like isoform X1 [Prunus mume]
PaF106G0700027940.01	1935	1401	1906	430	345	438	28.7575	24.9152	29.2101	6.95184	5.98252	6.51149	1.01944e-60	-1.96309	down	[R]	General function prediction only	Cellular Component: endoplasmic reticulum (GO:0005783);; Biological Process: auxin metabolic process (GO:0009850);; Molecular Function: IAA-Ala conjugate hydrolase activity (GO:0010179);; Molecular Function: hydrolase activity (GO:0016787);;	K14664|3.0e-249|pmum:103341724|K14664 IAA-amino acid hydrolase [EC:3.5.1.-] | (RefSeq) IAA-amino acid hydrolase ILR1-like 3	--	--	--	Peptidase family M20/M25/M40	IAA-amino acid hydrolase ILR1-like 3 OS=Oryza sativa subsp. japonica OX=39947 GN=ILL3 PE=2 SV=1	S	Function unknown	unnamed protein product [Prunus armeniaca]
PaF106G0700025930.01	9	24	28	105	84	89	0.141516	0.453186	0.52627	1.95825	1.63017	1.62474	8.11094e-07	1.66769	up	[QR]	Secondary metabolites biosynthesis, transport and catabolism;; General function prediction only	Molecular Function: 2-alkenal reductase [NAD(P)] activity (GO:0032440);;	K19825|1.7e-93|vvi:100256090|K19825 2-alkenal reductase (NADP+) [EC:1.3.1.102] | (RefSeq) NADP-dependent alkenal double bond reductase P2-like	--	[R]	General function prediction only	Zinc-binding dehydrogenase	2-alkenal reductase (NADP(+)-dependent) OS=Nicotiana tabacum OX=4097 GN=DBR PE=1 SV=1	S	Function unknown	unnamed protein product [Prunus armeniaca]
PaF106G0300013855.01	3185	3257	3147	1385	824	894	27.243	33.3354	27.763	12.8938	8.22532	7.64964	6.12492e-07	-1.32599	down	[QV]	Secondary metabolites biosynthesis, transport and catabolism;; Defense mechanisms	Molecular Function: iron ion binding (GO:0005506);; Cellular Component: membrane (GO:0016020);; Cellular Component: integral component of membrane (GO:0016021);; Molecular Function: oxidoreductase activity, acting on paired donors, with incorporation or reduction of molecular oxygen, NAD(P)H as one donor, and incorporation of one atom of oxygen (GO:0016709);; Molecular Function: heme binding (GO:…	K23136|5.9e-177|gra:105769156|K23136 fraxetin 5-hydroxylase [EC:1.14.14.164] | (RefSeq) uncharacterized LOC105769156	--	[Q]	Secondary metabolites biosynthesis, transport and catabolism	Cytochrome P450	Cytochrome P450 82A3 OS=Glycine max OX=3847 GN=CYP82A3 PE=2 SV=1	Q	Secondary metabolites biosynthesis, transport and catabolism	PREDICTED: cytochrome P450 CYP82D47-like [Prunus mume]
PaF106G0700029104.01	854	633	835	1546	1497	1586	12.4164	11.0074	12.5227	24.4608	25.401	23.0896	1.65689e-22	1.06934	up	[CO]	Energy production and conversion;; Posttranslational modification, protein turnover, chaperones	Molecular Function: copper ion binding (GO:0005507);; Cellular Component: integral component of membrane (GO:0016021);;	K02258|7.8e-97|pper:18771760|K02258 cytochrome c oxidase assembly protein subunit 11 | (RefSeq) cytochrome c oxidase assembly protein COX11, mitochondrial	Oxidative phosphorylation (ko00190)	[O]	Posttranslational modification, protein turnover, chaperones	Cytochrome c oxidase assembly protein CtaG/Cox11	Cytochrome c oxidase assembly protein COX11, mitochondrial OS=Arabidopsis thaliana OX=3702 GN=COX11 PE=2 SV=1	O	Posttranslational modification, protein turnover, chaperones	unnamed protein product [Prunus armeniaca]
PaF106G0300011965.01	3639	3002	3231	556	653	779	39.2682	38.7648	35.962	6.52909	8.21579	8.4123	9.55857e-109	-2.18545	down	[G]	Carbohydrate transport and metabolism	Biological Process: polysaccharide catabolic process (GO:0000272);; Molecular Function: beta-amylase activity (GO:0016161);; Molecular Function: amylopectin maltohydrolase activity (GO:0102229);;	K01177|1.1e-300|pper:18782689|K01177 beta-amylase [EC:3.2.1.2] | (RefSeq) beta-amylase	Starch and sucrose metabolism (ko00500)	--	--	Glycosyl hydrolase family 14	Beta-amylase OS=Trifolium repens OX=3899 GN=BMY1 PE=2 SV=1	G	Carbohydrate transport and metabolism	unnamed protein product [Prunus armeniaca]
PaF106G0700028436.01	521	408	447	152	143	200	6.82203	6.39393	6.03414	2.15788	2.17339	2.62241	3.0376e-17	-1.32742	down	[CR]	Energy production and conversion;; General function prediction only	Molecular Function: oxidoreductase activity (GO:0016491);;	K00344|1.8e-42|lsv:111889955|K00344 NADPH:quinone reductase [EC:1.6.5.5] | (RefSeq) uncharacterized protein LOC111889955	--	[CR]	Energy production and conversion;; General function prediction only	Zinc-binding dehydrogenase	NADPH-dependent alkenal/one oxidoreductase, chloroplastic OS=Arabidopsis thaliana OX=3702 GN=AOR PE=1 SV=2	C	Energy production and conversion	unnamed protein product [Prunus armeniaca]
PaF106G0600024624.01	133	172	125	45	48	55	1.42388	2.21685	1.38016	0.525825	0.598109	0.585362	3.55229e-06	-1.25916	down	[G]	Carbohydrate transport and metabolism	Molecular Function: ATP binding (GO:0005524);;	K09753|3.4e-06|dosa:Os09t0262000-00|K09753 cinnamoyl-CoA reductase [EC:1.2.1.44] | (RefSeq) Os09g0262000; Similar to Cinnamoyl CoA reductase.	Phenylpropanoid biosynthesis (ko00940)	[O]	Posttranslational modification, protein turnover, chaperones	ATPase family associated with various cellular activities (AAA)	Ribulose bisphosphate carboxylase/oxygenase activase 1, chloroplastic OS=Larrea tridentata OX=66636 GN=RCA1 PE=1 SV=1	O	Posttranslational modification, protein turnover, chaperones	unnamed protein product [Prunus armeniaca]
PaF106G0100003006.01	1368	1269	1355	2813	2796	3500	16.8953	18.619	17.018	37.8295	40.3072	42.877	5.14394e-50	1.25419	up	[I]	Lipid transport and metabolism	Cellular Component: integral component of membrane (GO:0016021);;	K07393|2.2e-38|zma:103649984|K07393 glutathionyl-hydroquinone reductase [EC:1.8.5.7] | (RefSeq) uncharacterized protein LOC103649984	--	--	--	--	--	S	Function unknown	uncharacterized protein LOC110773589 [Prunus avium]
PaF106G0800032088.01	310	267	332	94	95	112	6.14501	7.26891	6.57728	1.94917	2.05648	2.08341	3.30164e-14	-1.40998	down	[J]	Translation, ribosomal structure and biogenesis	--	--	--	--	--	Putative rRNA methylase	--	Q	Secondary metabolites biosynthesis, transport and catabolism	unnamed protein product [Prunus armeniaca]
PaF106G0800030782.01	11	15	3	172	130	155	0.182273	0.30162	0.051268	3.29986	2.67128	2.74211	3.81904e-23	3.07084	up	[T]	Signal transduction mechanisms	Molecular Function: protein serine/threonine kinase activity (GO:0004674);; Molecular Function: ATP binding (GO:0005524);; Cellular Component: plasma membrane (GO:0005886);; Biological Process: protein phosphorylation (GO:0006468);; Biological Process: cell surface receptor signaling pathway (GO:0007166);;	K23544|3.9e-34|brp:103842861|K23544 serine incorporator 1/3 | (RefSeq) serine incorporator 3	--	[T]	Signal transduction mechanisms	Protein tyrosine and serine/threonine kinase	Serine/threonine-protein kinase ZRK1 OS=Arabidopsis thaliana OX=3702 GN=ZRK1 PE=1 SV=1	T	Signal transduction mechanisms	unnamed protein product [Prunus armeniaca]
PaF106G0800031286.01	3544	2969	3138	1147	1156	1589	37.1553	37.664	32.961	13.0473	13.8346	16.4075	2.34657e-38	-1.21063	down	[I]	Lipid transport and metabolism	Molecular Function: catalytic activity (GO:0003824);; Biological Process: signal transduction (GO:0007165);; Molecular Function: ADP binding (GO:0043531);;	K01897|5.9e-116|pavi:110773637|K01897 long-chain acyl-CoA synthetase [EC:6.2.1.3] | (RefSeq) LOW QUALITY PROTEIN: long chain acyl-CoA synthetase 2-like	Fatty acid biosynthesis (ko00061);; Fatty acid degradation (ko00071);; Fatty acid metabolism (ko01212);; Peroxisome (ko04146)	[I]	Lipid transport and metabolism	AMP-binding enzyme	Long chain acyl-CoA synthetase 2 OS=Arabidopsis thaliana OX=3702 GN=LACS2 PE=2 SV=1	I	Lipid transport and metabolism	unnamed protein product [Prunus armeniaca]
PaF106G0100005910.01	3814	2951	3881	1148	1106	1694	31.3032	28.9858	32.8534	10.2553	10.5896	13.9163	4.46124e-31	-1.32028	down	[G]	Carbohydrate transport and metabolism	Molecular Function: hydrolase activity, hydrolyzing O-glycosyl compounds (GO:0004553);; Molecular Function: xylan 1,4-beta-xylosidase activity (GO:0009044);; Cellular Component: plant-type cell wall (GO:0009505);; Cellular Component: plasmodesma (GO:0009506);; Cellular Component: chloroplast (GO:0009507);; Biological Process: arabinan catabolic process (GO:0031222);; Biological Process: xylan cat…	K15920|2.9e-223|gab:108476039|K15920 xylan 1,4-beta-xylosidase [EC:3.2.1.37] | (RefSeq) beta-xylosidase/alpha-L-arabinofuranosidase 2	Amino sugar and nucleotide sugar metabolism (ko00520)	--	--	Glycosyl hydrolase family 3 C-terminal domain	Probable beta-D-xylosidase 7 OS=Arabidopsis thaliana OX=3702 GN=BXL7 PE=2 SV=2	G	Carbohydrate transport and metabolism	unnamed protein product [Prunus armeniaca]
PaF106G0800030529.01	58	51	83	12	12	32	0.944047	0.99781	1.4061	0.200694	0.217781	0.518495	0.000830176	-1.21208	down	[K]	Transcription	Molecular Function: O-methyltransferase activity (GO:0008171);; Biological Process: methylation (GO:0032259);; Molecular Function: protein dimerization activity (GO:0046983);;	K22588|1.7e-106|ath:AT4G35160|K22588 acetylserotonin O-methyltransferase, plant [EC:2.1.1.4] | (RefSeq) O-methyltransferase family protein	Tryptophan metabolism (ko00380)	[R]	General function prediction only	O-methyltransferase domain	Acetylserotonin O-methyltransferase OS=Arabidopsis thaliana OX=3702 GN=ASMT PE=1 SV=1	S	Function unknown	unnamed protein product [Prunus armeniaca]
PaF106G0100004308.01	0	0	0	346	386	495	0	0	0	13.1481	15.7521	17.3322	2.00588e-84	5.902	up	[O]	Posttranslational modification, protein turnover, chaperones	Molecular Function: serine-type endopeptidase activity (GO:0004252);; Cellular Component: extracellular space (GO:0005615);;	K12663|6.4e-07|aip:107640222|K12663 Delta3,5-Delta2,4-dienoyl-CoA isomerase [EC:5.3.3.21] | (RefSeq) delta(3,5)-Delta(2,4)-dienoyl-CoA isomerase, peroxisomal-like	Peroxisome (ko04146)	--	--	Subtilase family	Subtilisin-like protease SBT3 OS=Solanum lycopersicum OX=4081 GN=sbt3 PE=1 SV=1	O	Posttranslational modification, protein turnover, chaperones	hypothetical protein PRUPE_1G433200 [Prunus persica]
PaF106G0600022188.01	101	136	81	8	41	54	1.99325	3.22043	1.64701	0.15708	0.940079	1.07326	0.00410208	-1.07803	down	[IQR]	Lipid transport and metabolism;; Secondary metabolites biosynthesis, transport and catabolism;; General function prediction only	Molecular Function: oxidoreductase activity (GO:0016491);;	K08081|7.2e-150|pper:18772283|K08081 tropinone reductase I [EC:1.1.1.206] | (RefSeq) tropinone reductase homolog At5g06060 isoform X1	Tropane, piperidine and pyridine alkaloid biosynthesis (ko00960)	[R]	General function prediction only	Enoyl-(Acyl carrier protein) reductase	Tropinone reductase homolog At5g06060 OS=Arabidopsis thaliana OX=3702 GN=At5g06060 PE=2 SV=1	Q	Secondary metabolites biosynthesis, transport and catabolism	unnamed protein product [Prunus armeniaca]
PaF106G0700027475.01	5	12	7	92	130	124	0.039894	0.116055	0.06052	0.836031	1.2718	1.03994	3.80866e-19	2.87402	up	[R]	General function prediction only	Molecular Function: ADP binding (GO:0043531);;	K13415|5.0e-37|mdm:103413440|K13415 protein brassinosteroid insensitive 1 [EC:2.7.10.1 2.7.11.1] | (RefSeq) uncharacterized protein LOC103413440 isoform X1	Plant hormone signal transduction (ko04075)	--	--	NB-ARC domain	Probable disease resistance protein At5g66900 OS=Arabidopsis thaliana OX=3702 GN=At5g66900 PE=3 SV=1	S	Function unknown	unnamed protein product [Prunus armeniaca]
PaF106G0800032287.01	580	419	408	125	202	240	9.54656	8.08739	7.14585	2.22499	3.83993	3.85655	5.37182e-08	-1.12861	down	[HC]	Coenzyme transport and metabolism;; Energy production and conversion	Molecular Function: FAD binding (GO:0071949);;	--	--	[CR]	Energy production and conversion;; General function prediction only	FAD binding domain	Monooxygenase 1 OS=Arabidopsis thaliana OX=3702 GN=MO1 PE=2 SV=1	C	Energy production and conversion	PREDICTED: FAD-dependent urate hydroxylase-like isoform X2 [Prunus mume]
PaF106G0800032469.01	226	106	93	753	766	1030	4.53815	2.50757	1.94841	19.0809	20.3431	22.9015	1.96363e-30	2.44166	up	[I]	Lipid transport and metabolism	Molecular Function: 3-hydroxyisobutyryl-CoA hydrolase activity (GO:0003860);; Biological Process: valine catabolic process (GO:0006574);;	K05605|1.7e-78|pmum:103322388|K05605 3-hydroxyisobutyryl-CoA hydrolase [EC:3.1.2.4] | (RefSeq) 3-hydroxyisobutyryl-CoA hydrolase-like protein 5	Valine, leucine and isoleucine degradation (ko00280);; beta-Alanine metabolism (ko00410);; Propanoate metabolism (ko00640);; Carbon metabolism (ko01200)	--	--	Enoyl-CoA hydratase/isomerase	3-hydroxyisobutyryl-CoA hydrolase-like protein 5 OS=Arabidopsis thaliana OX=3702 GN=At1g06550 PE=1 SV=2	I	Lipid transport and metabolism	PREDICTED: 3-hydroxyisobutyryl-CoA hydrolase-like protein 5 [Prunus mume]
PaF106G0100002301.01	168	142	188	1002	688	735	2.84818	2.8891	3.29162	18.554	13.6668	12.5186	9.64172e-36	2.23365	up	[G]	Carbohydrate transport and metabolism	Biological Process: biosynthetic process (GO:0009058);; Cellular Component: integral component of membrane (GO:0016021);; Molecular Function: strictosidine synthase activity (GO:0016844);;	K01757|2.9e-46|csat:104713030|K01757 strictosidine synthase [EC:4.3.3.2] | (RefSeq) protein STRICTOSIDINE SYNTHASE-LIKE 12	Indole alkaloid biosynthesis (ko00901)	[R]	General function prediction only	Strictosidine synthase	Protein STRICTOSIDINE SYNTHASE-LIKE 13 OS=Arabidopsis thaliana OX=3702 GN=SSL13 PE=1 SV=1	J	Translation, ribosomal structure and biogenesis	unnamed protein product [Prunus armeniaca]
PaF106G0500019363.01	1314	1308	1162	57	33	35	8.27301	9.85745	7.54482	0.388889	0.24052	0.216303	1.37173e-134	-4.49668	down	[R]	General function prediction only	Biological Process: signal transduction (GO:0007165);; Molecular Function: ADP binding (GO:0043531);;	K00695|8.0e-168|mtr:MTR_6g478030|K00695 sucrose synthase [EC:2.4.1.13] | (RefSeq) sucrose synthase	Starch and sucrose metabolism (ko00500)	--	--	TIR domain	Disease resistance protein RPV1 OS=Vitis rotundifolia OX=103349 GN=RPV1 PE=1 SV=1	T	Signal transduction mechanisms	PREDICTED: TMV resistance protein N-like isoform X1 [Prunus mume]
PaF106G0800030401.01	290	326	390	788	733	829	1.58636	2.13945	2.20539	4.70849	4.69631	4.55755	1.46595e-16	1.25075	up	[R]	General function prediction only	Biological Process: signal transduction (GO:0007165);; Molecular Function: ADP binding (GO:0043531);;	K00695|1.0e-97|mtr:MTR_6g478030|K00695 sucrose synthase [EC:2.4.1.13] | (RefSeq) sucrose synthase	Starch and sucrose metabolism (ko00500)	--	--	TIR domain	TMV resistance protein N OS=Nicotiana glutinosa OX=35889 GN=N PE=1 SV=1	T	Signal transduction mechanisms	PREDICTED: probable disease resistance protein RPP1 isoform X2 [Prunus mume]
PaF106G0100004306.01	24	20	32	122	136	147	0.18742	0.188269	0.262029	1.06767	1.28028	1.19065	1.06517e-14	2.10891	up	[O]	Posttranslational modification, protein turnover, chaperones	Molecular Function: serine-type endopeptidase activity (GO:0004252);;	K15333|6.7e-45|nsy:104224633|K15333 tRNA guanosine-2'-O-methyltransferase [EC:2.1.1.34] | (RefSeq) uncharacterized protein LOC104224633	--	--	--	Subtilase family	Subtilisin-like protease SBT3 OS=Solanum lycopersicum OX=4081 GN=sbt3 PE=1 SV=1	O	Posttranslational modification, protein turnover, chaperones	unnamed protein product [Prunus armeniaca]
PaF106G0400018193.01	288	194	194	47	57	54	4.37982	3.53702	3.04577	0.779634	0.998312	0.824042	3.32223e-14	-1.77853	down	[Q]	Secondary metabolites biosynthesis, transport and catabolism	Molecular Function: oxidoreductase activity (GO:0016491);; Molecular Function: metal ion binding (GO:0046872);;	K04125|3.3e-161|pmum:103324491|K04125 gibberellin 2beta-dioxygenase [EC:1.14.11.13] | (RefSeq) gibberellin 2-beta-dioxygenase 8 isoform X1	Diterpenoid biosynthesis (ko00904)	[QR]	Secondary metabolites biosynthesis, transport and catabolism;; General function prediction only	2OG-Fe(II) oxygenase superfamily	Gibberellin 2-beta-dioxygenase 8 OS=Arabidopsis thaliana OX=3702 GN=GA2OX8 PE=1 SV=2	Q	Secondary metabolites biosynthesis, transport and catabolism	unnamed protein product [Prunus armeniaca]
PaF106G0700028433.01	414	434	397	116	86	191	5.81286	7.28635	5.74918	1.77064	1.40007	2.67165	7.40968e-12	-1.46918	down	[CR]	Energy production and conversion;; General function prediction only	Molecular Function: oxidoreductase activity (GO:0016491);;	K00344|2.0e-42|lsv:111889955|K00344 NADPH:quinone reductase [EC:1.6.5.5] | (RefSeq) uncharacterized protein LOC111889955	--	[CR]	Energy production and conversion;; General function prediction only	Zinc-binding dehydrogenase	NADPH-dependent alkenal/one oxidoreductase, chloroplastic OS=Arabidopsis thaliana OX=3702 GN=AOR PE=1 SV=2	C	Energy production and conversion	unnamed protein product [Prunus armeniaca]
PaF106G0600022783.01	124	85	91	35	23	43	1.99684	1.62551	1.51409	0.60611	0.429879	0.690129	3.96695e-05	-1.22522	down	[E]	Amino acid transport and metabolism	Molecular Function: L-threonine ammonia-lyase activity (GO:0004794);; Biological Process: isoleucine biosynthetic process (GO:0009097);; Molecular Function: pyridoxal phosphate binding (GO:0030170);;	K01754|1.9e-237|pmum:103327534|K01754 threonine dehydratase [EC:4.3.1.19] | (RefSeq) threonine dehydratase biosynthetic, chloroplastic-like	Glycine, serine and threonine metabolism (ko00260);; Valine, leucine and isoleucine biosynthesis (ko00290);; Carbon metabolism (ko01200);; Biosynthesis of amino acids (ko01230)	[E]	Amino acid transport and metabolism	Pyridoxal-phosphate dependent enzyme	Threonine dehydratase 1 biosynthetic, chloroplastic OS=Solanum lycopersicum OX=4081 GN=TD1 PE=1 SV=1	E	Amino acid transport and metabolism	unnamed protein product [Prunus armeniaca]
PaF106G0200007374.01	260	274	290	721	650	803	1.55173	1.95787	1.78311	4.68984	4.53516	4.80739	9.46729e-26	1.42828	up	[R]	General function prediction only	Molecular Function: ADP binding (GO:0043531);;	K12818|4.8e-205|mtr:MTR_0267s0070|K12818 ATP-dependent RNA helicase DHX8/PRP22 [EC:3.6.4.13] | (RefSeq) NB-ARC domain disease resistance protein, putative	Spliceosome (ko03040)	[T]	Signal transduction mechanisms	NB-ARC domain	Putative disease resistance RPP13-like protein 1 OS=Arabidopsis thaliana OX=3702 GN=RPPL1 PE=3 SV=1	T	Signal transduction mechanisms	PREDICTED: LOW QUALITY PROTEIN: putative disease resistance RPP13-like protein 1 [Prunus mume]
PaF106G0800032168.01	10	0	6	60	83	62	0.298186	0	0.181065	2.13139	3.15441	2.01481	4.55942e-10	2.29175	up	[H]	Coenzyme transport and metabolism	Biological Process: cellular amino acid metabolic process (GO:0006520);; Biological Process: pyridoxine biosynthetic process (GO:0008615);; Molecular Function: amine-lyase activity (GO:0016843);; Biological Process: pyridoxal phosphate biosynthetic process (GO:0042823);;	K06215|3.1e-33|cic:CICLE_v10012274mg|K06215 pyridoxal 5'-phosphate synthase pdxS subunit [EC:4.3.3.6] | (RefSeq) hypothetical protein	Vitamin B6 metabolism (ko00750)	[H]	Coenzyme transport and metabolism	SOR/SNZ family	Probable pyridoxal 5'-phosphate synthase subunit PDX1 OS=Hevea brasiliensis OX=3981 GN=PDX1 PE=2 SV=1	H	Coenzyme transport and metabolism	hypothetical protein PRUPE_8G053100 [Prunus persica]
PaF106G0400017268.01	893	866	901	2535	2174	2341	10.3897	12.0593	10.8194	32.1229	29.5517	27.2961	3.35511e-40	1.46143	up	[E]	Amino acid transport and metabolism	Cellular Component: plasma membrane (GO:0005886);; Biological Process: amino acid transport (GO:0006865);; Molecular Function: amino acid transmembrane transporter activity (GO:0015171);; Molecular Function: L-lysine transmembrane transporter activity (GO:0015189);; Cellular Component: integral component of membrane (GO:0016021);;	K03294|2.5e-181|pper:18778188|K03294 basic amino acid/polyamine antiporter, APA family | (RefSeq) cationic amino acid transporter 1	--	[E]	Amino acid transport and metabolism	Amino acid permease	Cationic amino acid transporter 1 OS=Arabidopsis thaliana OX=3702 GN=CAT1 PE=1 SV=1	E	Amino acid transport and metabolism	unnamed protein product [Prunus armeniaca]
PaF106G0100000246.01	162	103	101	490	696	988	2.81772	2.19713	1.8399	9.25086	14.121	17.228	3.64724e-32	2.42744	up	[E]	Amino acid transport and metabolism	Cellular Component: plasma membrane (GO:0005886);; Molecular Function: zinc ion binding (GO:0008270);; Biological Process: methionine biosynthetic process (GO:0009086);; Biological Process: methylation (GO:0032259);; Molecular Function: betaine-homocysteine S-methyltransferase activity (GO:0047150);;	K00547|2.8e-188|pmum:103324014|K00547 homocysteine S-methyltransferase [EC:2.1.1.10] | (RefSeq) homocysteine S-methyltransferase 3	Cysteine and methionine metabolism (ko00270)	[E]	Amino acid transport and metabolism	Homocysteine S-methyltransferase	Homocysteine S-methyltransferase 3 OS=Arabidopsis thaliana OX=3702 GN=HMT3 PE=1 SV=2	E	Amino acid transport and metabolism	PREDICTED: homocysteine S-methyltransferase 3 [Prunus mume]
PaF106G0200008249.01	184	201	138	46	52	68	1.01739	1.33732	0.784693	0.272651	0.335819	0.377069	1.01618e-07	-1.37956	down	[R]	General function prediction only	Biological Process: defense response (GO:0006952);; Molecular Function: ADP binding (GO:0043531);;	K15078|4.1e-123|tcc:18614561|K15078 structure-specific endonuclease subunit SLX1 [EC:3.6.1.-] | (RefSeq) putative disease resistance protein RGA3	--	[T]	Signal transduction mechanisms	NB-ARC domain	Putative disease resistance protein RGA3 OS=Solanum bulbocastanum OX=147425 GN=RGA3 PE=2 SV=2	T	Signal transduction mechanisms	unnamed protein product [Prunus armeniaca]
PaF106G0200009680.01	58	59	75	11	21	32	0.810405	0.975714	1.0859	0.163958	0.328966	0.442628	0.00182312	-1.10804	down	[Q]	Secondary metabolites biosynthesis, transport and catabolism	Biological Process: fatty acid biosynthetic process (GO:0006633);; Cellular Component: integral component of membrane (GO:0016021);; Molecular Function: transferase activity, transferring acyl groups other than amino-acyl groups (GO:0016747);;	K15397|2.3e-276|pper:18785426|K15397 3-ketoacyl-CoA synthase [EC:2.3.1.199] | (RefSeq) 3-ketoacyl-CoA synthase 19	Fatty acid elongation (ko00062);; Plant-pathogen interaction (ko04626)	--	--	FAE1/Type III polyketide synthase-like protein	3-ketoacyl-CoA synthase 19 OS=Arabidopsis thaliana OX=3702 GN=KCS19 PE=2 SV=1	I	Lipid transport and metabolism	3-ketoacyl-CoA synthase 19 [Prunus persica]
PaF106G0800030332.01	16	18	18	43	48	60	0.336005	0.433846	0.374195	0.979002	1.16822	1.24799	0.000729446	1.18347	up	[I]	Lipid transport and metabolism	--	K17361|4.5e-106|cpap:110821782|K17361 acyl-coenzyme A thioesterase 9 [EC:3.1.2.-] | (RefSeq) acyl-coenzyme A thioesterase 9, mitochondrial isoform X1	--	[I]	Lipid transport and metabolism	Thioesterase superfamily	--	I	Lipid transport and metabolism	unnamed protein product [Prunus armeniaca]
PaF106G0400015032.01	1303	815	898	180	164	299	15.8722	12.0703	11.4066	2.22316	2.26831	3.5352	1.61242e-30	-2.02101	down	[F]	Nucleotide transport and metabolism	Cellular Component: cytoplasm (GO:0005737);; Molecular Function: hydrolase activity, acting on carbon-nitrogen (but not peptide) bonds (GO:0016810);;	K01464|4.7e-76|pper:18778568|K01464 dihydropyrimidinase [EC:3.5.2.2] | (RefSeq) dihydropyrimidinase	Pyrimidine metabolism (ko00240);; beta-Alanine metabolism (ko00410);; Pantothenate and CoA biosynthesis (ko00770)	[F]	Nucleotide transport and metabolism	Amidohydrolase family	Dihydropyrimidinase OS=Arabidopsis thaliana OX=3702 GN=PYD2 PE=1 SV=1	F	Nucleotide transport and metabolism	unnamed protein product [Prunus armeniaca]
PaF106G0200010499.01	136	84	81	279	256	296	1.79887	1.31897	1.10483	4.02243	3.95587	3.91801	7.01986e-12	1.43491	up	[QV]	Secondary metabolites biosynthesis, transport and catabolism;; Defense mechanisms	Molecular Function: monooxygenase activity (GO:0004497);; Molecular Function: iron ion binding (GO:0005506);; Cellular Component: integral component of membrane (GO:0016021);; Molecular Function: oxidoreductase activity, acting on paired donors, with incorporation or reduction of molecular oxygen (GO:0016705);; Molecular Function: heme binding (GO:0020037);;	K07425|2.8e-190|nau:109241958|K07425 long-chain fatty acid omega-monooxygenase [EC:1.14.14.80] | (RefSeq) cytokinin hydroxylase-like	Fatty acid degradation (ko00071);; Arachidonic acid metabolism (ko00590)	[QI]	Secondary metabolites biosynthesis, transport and catabolism;; Lipid transport and metabolism	Cytochrome P450	Cytochrome P450 714C2 OS=Oryza sativa subsp. japonica OX=39947 GN=CYP714C2 PE=2 SV=1	Q	Secondary metabolites biosynthesis, transport and catabolism	unnamed protein product [Prunus armeniaca]
PaF106G0500018896.01	692	585	727	1424	1185	1503	12.4266	12.6832	13.4618	27.792	24.3507	26.8767	6.39244e-24	1.09952	up	[M]	Cell wall/membrane/envelope biogenesis	Molecular Function: oxidoreductase activity (GO:0016491);; Molecular Function: oxidoreductase activity, acting on the CH-OH group of donors, NAD or NADP as acceptor (GO:0016616);;	K09753|2.6e-27|ppp:112293893|K09753 cinnamoyl-CoA reductase [EC:1.2.1.44] | (RefSeq) cinnamoyl-CoA reductase 1-like	Phenylpropanoid biosynthesis (ko00940)	[V]	Defense mechanisms	--	Cinnamoyl-CoA reductase-like SNL6 OS=Oryza sativa subsp. japonica OX=39947 GN=SNL6 PE=3 SV=1	V	Defense mechanisms	unnamed protein product [Prunus armeniaca]
PaF106G0700027943.01	77	81	59	27	19	30	1.59182	2.02195	1.25726	0.589332	0.453392	0.607283	0.000629712	-1.12401	down	[IQR]	Lipid transport and metabolism;; Secondary metabolites biosynthesis, transport and catabolism;; General function prediction only	Molecular Function: oxidoreductase activity (GO:0016491);;	K13070|1.3e-82|dosa:Os04t0179200-01|K13070 momilactone-A synthase [EC:1.1.1.295] | (RefSeq) Os04g0179200, MAS, MOMILACTONE_A_SYNTHASE; Similar to Stem secoisolariciresinol dehydrogenase (Fragment).	Diterpenoid biosynthesis (ko00904)	[R]	General function prediction only	Enoyl-(Acyl carrier protein) reductase	Secoisolariciresinol dehydrogenase (Fragment) OS=Forsythia intermedia OX=55183 PE=1 SV=1	Q	Secondary metabolites biosynthesis, transport and catabolism	unnamed protein product [Prunus armeniaca]
PaF106G0200008345.01	61	33	51	344	318	298	0.360467	0.232728	0.311399	2.22008	2.19983	1.76761	2.60449e-31	2.55721	up	[R]	General function prediction only	Biological Process: signal transduction (GO:0007165);; Molecular Function: ADP binding (GO:0043531);;	K00695|2.6e-97|mtr:MTR_6g478030|K00695 sucrose synthase [EC:2.4.1.13] | (RefSeq) sucrose synthase	Starch and sucrose metabolism (ko00500)	--	--	TIR domain	Disease resistance protein RUN1 OS=Vitis rotundifolia OX=103349 GN=RUN1 PE=1 SV=1	S	Function unknown	TMV resistance protein N isoform X1 [Prunus persica]
PaF106G0700027210.01	4	4	1	542	678	831	0.081636	0.112391	0.017739	14.2569	19.1087	20.0912	7.1244e-112	6.05551	up	[MDT]	Cell wall/membrane/envelope biogenesis;; Cell cycle control, cell division, chromosome partitioning;; Signal transduction mechanisms	Molecular Function: ATP binding (GO:0005524);;	K08900|1.3e-103|pmum:103340284|K08900 mitochondrial chaperone BCS1 | (RefSeq) uncharacterized protein LOC103340284	--	[O]	Posttranslational modification, protein turnover, chaperones	ATPase family associated with various cellular activities (AAA)	AAA-ATPase At2g18193 OS=Arabidopsis thaliana OX=3702 GN=At2g18193 PE=2 SV=1	O	Posttranslational modification, protein turnover, chaperones	PREDICTED: uncharacterized protein LOC103340284 [Prunus mume]
PaF106G0400018078.01	152	108	103	218	313	228	1.90704	1.6025	1.31652	3.04609	4.57245	2.956	8.96153e-06	1.0542	up	[G]	Carbohydrate transport and metabolism	Molecular Function: catalytic activity (GO:0003824);; Biological Process: trehalose biosynthetic process (GO:0005992);;	K01087|8.0e-172|pmum:103333353|K01087 trehalose 6-phosphate phosphatase [EC:3.1.3.12] | (RefSeq) trehalose-phosphate phosphatase A	Starch and sucrose metabolism (ko00500)	[G]	Carbohydrate transport and metabolism	Trehalose-phosphatase	Trehalose-phosphate phosphatase A OS=Arabidopsis thaliana OX=3702 GN=TPPA PE=1 SV=1	G	Carbohydrate transport and metabolism	unnamed protein product [Prunus armeniaca]
PaF106G0200010042.01	281	308	250	75	87	136	2.74578	3.61004	2.52256	0.794922	0.987538	1.3335	9.51041e-09	-1.29529	down	[DPM]	Cell cycle control, cell division, chromosome partitioning;; Inorganic ion transport and metabolism;; Cell wall/membrane/envelope biogenesis	Molecular Function: copper ion binding (GO:0005507);; Biological Process: lignin catabolic process (GO:0046274);; Cellular Component: apoplast (GO:0048046);; Molecular Function: hydroquinone:oxygen oxidoreductase activity (GO:0052716);;	K05909|0.0e+00|pmum:103332838|K05909 laccase [EC:1.10.3.2] | (RefSeq) laccase-12-like	--	[Q]	Secondary metabolites biosynthesis, transport and catabolism	Multicopper oxidase	Laccase-5 OS=Arabidopsis thaliana OX=3702 GN=LAC5 PE=2 SV=1	Q	Secondary metabolites biosynthesis, transport and catabolism	unnamed protein product [Prunus armeniaca]
PaF106G0100000423.01	14	8	22	95	97	135	0.123171	0.079414	0.212085	0.977011	1.06729	1.27619	1.38002e-13	2.30585	up	[N]	Cell motility	Cellular Component: Golgi apparatus (GO:0005794);; Cellular Component: trans-Golgi network (GO:0005802);; Cellular Component: plasma membrane (GO:0005886);; Biological Process: plant-type primary cell wall biogenesis (GO:0009833);; Cellular Component: integral component of membrane (GO:0016021);; Molecular Function: cellulose synthase activity (GO:0016759);; Molecular Function: cellulose synthase…	K10999|1.3e-64|pmum:103324976|K10999 cellulose synthase A [EC:2.4.1.12] | (RefSeq) cellulose synthase A catalytic subunit 8 [UDP-forming]	--	--	--	Cellulose synthase	Cellulose synthase-like protein G3 OS=Arabidopsis thaliana OX=3702 GN=CSLG3 PE=2 SV=2	G	Carbohydrate transport and metabolism	PREDICTED: cellulose synthase-like protein G2 isoform X1 [Prunus mume]
PaF106G0300012152.01	14682	10719	12071	30866	30155	30438	225.6	197.109	191.324	516.196	540.861	468.263	4.3129e-52	1.36805	up	[G]	Carbohydrate transport and metabolism	Molecular Function: polygalacturonase activity (GO:0004650);; Cellular Component: extracellular region (GO:0005576);; Biological Process: carbohydrate metabolic process (GO:0005975);; Biological Process: cell wall organization (GO:0071555);;	K01213|3.0e-189|pmum:103329198|K01213 galacturan 1,4-alpha-galacturonidase [EC:3.2.1.67] | (RefSeq) exopolygalacturonase-like	Pentose and glucuronate interconversions (ko00040)	--	--	Glycosyl hydrolases family 28	Exopolygalacturonase (Fragment) OS=Oenothera organensis OX=3945 PE=2 SV=1	G	Carbohydrate transport and metabolism	exopolygalacturonase-like [Prunus dulcis]
PaF106G0400018350.01	211	100	156	70	42	54	2.07204	1.17657	1.58192	0.741329	0.480774	0.531017	4.85256e-05	-1.16154	down	[G]	Carbohydrate transport and metabolism	Molecular Function: myo-inositol:proton symporter activity (GO:0005366);; Cellular Component: integral component of plasma membrane (GO:0005887);; Biological Process: glucose import (GO:0046323);;	K08150|0.0e+00|pper:18778767|K08150 MFS transporter, SP family, solute carrier family 2 (myo-inositol transporter), member 13 | (RefSeq) inositol transporter 4	--	[R]	General function prediction only	Sugar (and other) transporter	Inositol transporter 4 OS=Arabidopsis thaliana OX=3702 GN=INT4 PE=1 SV=1	U	Intracellular trafficking, secretion, and vesicular transport	unnamed protein product [Prunus armeniaca]
PaF106G0100002813.01	27	14	12	126	98	104	0.358325	0.222891	0.152809	1.82253	1.52667	1.38348	4.52487e-12	2.14256	up	[QV]	Secondary metabolites biosynthesis, transport and catabolism;; Defense mechanisms	Molecular Function: monooxygenase activity (GO:0004497);; Molecular Function: iron ion binding (GO:0005506);; Cellular Component: integral component of membrane (GO:0016021);; Molecular Function: oxidoreductase activity, acting on paired donors, with incorporation or reduction of molecular oxygen (GO:0016705);; Molecular Function: heme binding (GO:0020037);;	K23810|7.5e-172|vvi:100232891|K23810 (E)-8-carboxylinalool synthase [EC:1.14.14.-] | (RefSeq) GFH2; ripening-related P-450 enzyme-like	Monoterpenoid biosynthesis (ko00902)	[Q]	Secondary metabolites biosynthesis, transport and catabolism	Cytochrome P450	Geraniol 8-hydroxylase OS=Catharanthus roseus OX=4058 GN=CYP76B6 PE=1 SV=1	Q	Secondary metabolites biosynthesis, transport and catabolism	unnamed protein product [Prunus armeniaca]
PaF106G0800030844.01	1264	873	1269	432	395	323	13.5172	11.1671	13.9955	5.02983	4.92039	3.45611	1.18377e-16	-1.37821	down	[G]	Carbohydrate transport and metabolism	Molecular Function: hydrolase activity, hydrolyzing O-glycosyl compounds (GO:0004553);; Biological Process: carbohydrate metabolic process (GO:0005975);;	K01181|9.9e-29|nta:107811288|K01181 endo-1,4-beta-xylanase [EC:3.2.1.8] | (RefSeq) probable endo-1,4-beta-xylanase C	--	--	--	Glycosyl hydrolase family 10	Endo-1,4-beta-xylanase 5-like OS=Arabidopsis thaliana OX=3702 GN=At4g33820 PE=2 SV=1	G	Carbohydrate transport and metabolism	uncharacterized protein LOC18766455 [Prunus persica]
PaF106G0800030444.01	24	12	14	68	44	56	0.302015	0.184201	0.175918	0.957977	0.668285	0.724548	0.000161764	1.33199	up	[P]	Inorganic ion transport and metabolism	Molecular Function: N,N-dimethylaniline monooxygenase activity (GO:0004499);; Molecular Function: flavin adenine dinucleotide binding (GO:0050660);; Molecular Function: NADP binding (GO:0050661);;	K11816|4.8e-17|pxb:103955340|K11816 indole-3-pyruvate monooxygenase [EC:1.14.13.168] | (RefSeq) probable indole-3-pyruvate monooxygenase YUCCA3	Tryptophan metabolism (ko00380)	[Q]	Secondary metabolites biosynthesis, transport and catabolism	Flavin-binding monooxygenase-like	Probable flavin-containing monooxygenase 1 OS=Arabidopsis thaliana OX=3702 GN=FMO1 PE=2 SV=1	Q	Secondary metabolites biosynthesis, transport and catabolism	unnamed protein product [Prunus armeniaca]
PaF106G0200007246.01	929	1033	994	266	442	547	3.79868	4.40161	3.85026	1.14478	1.90746	1.91647	1.46829e-08	-1.09125	down	[R]	General function prediction only	Molecular Function: ADP binding (GO:0043531);;	K12818|3.9e-206|mtr:MTR_0267s0070|K12818 ATP-dependent RNA helicase DHX8/PRP22 [EC:3.6.4.13] | (RefSeq) NB-ARC domain disease resistance protein, putative	Spliceosome (ko03040)	[T]	Signal transduction mechanisms	NB-ARC domain	Putative disease resistance RPP13-like protein 1 OS=Arabidopsis thaliana OX=3702 GN=RPPL1 PE=3 SV=1	T	Signal transduction mechanisms	putative disease resistance RPP13-like protein 1 isoform X3 [Prunus dulcis]
PaF106G0300013014.01	569	312	588	8	6	16	8.10145	5.32407	8.60772	0.12324	0.182182	0.261732	4.27009e-66	-4.55019	down	[Q]	Secondary metabolites biosynthesis, transport and catabolism	Molecular Function: diacylglycerol O-acyltransferase activity (GO:0004144);; Cellular Component: plasma membrane (GO:0005886);; Biological Process: triglyceride biosynthetic process (GO:0019432);; Molecular Function: long-chain-alcohol O-fatty-acyltransferase activity (GO:0047196);;	K20098|5.4e-65|mtr:MTR_4g078460|K20098 DNA excision repair protein ERCC-6-like 2 [EC:3.6.4.-] | (RefSeq) DNA repair and recombination RAD26-like protein, putative	--	--	--	WS/DGAT C-terminal domain	--	S	Function unknown	unnamed protein product [Prunus armeniaca]
PaF106G0700027011.01	171	131	141	25	14	15	2.99657	2.74555	2.56079	0.468837	0.269301	0.254678	4.45011e-17	-2.40128	down	[G]	Carbohydrate transport and metabolism	Biological Process: biosynthetic process (GO:0009058);; Cellular Component: integral component of membrane (GO:0016021);; Molecular Function: strictosidine synthase activity (GO:0016844);;	--	--	[R]	General function prediction only	Strictosidine synthase	Protein STRICTOSIDINE SYNTHASE-LIKE 5 OS=Arabidopsis thaliana OX=3702 GN=SSL5 PE=2 SV=1	J	Translation, ribosomal structure and biogenesis	protein STRICTOSIDINE SYNTHASE-LIKE 5-like [Prunus dulcis]
PaF106G0500020866.01	72	49	55	6	13	17	1.01081	0.826172	0.794569	0.084825	0.208956	0.228473	2.03141e-05	-1.52601	down	[M]	Cell wall/membrane/envelope biogenesis	Molecular Function: protein kinase activity (GO:0004672);; Molecular Function: ATP binding (GO:0005524);; Cellular Component: integral component of membrane (GO:0016021);;	--	--	--	--	Malectin domain	Probable LRR receptor-like serine/threonine-protein kinase At1g56130 OS=Arabidopsis thaliana OX=3702 GN=At1g56130 PE=2 SV=2	T	Signal transduction mechanisms	PREDICTED: probable LRR receptor [Prunus dulcis]
PaF106G0700026470.01	236	174	173	501	508	768	3.72324	3.33081	2.74301	8.90529	9.33844	12.2019	7.75842e-22	1.5979	up	[I]	Lipid transport and metabolism	--	--	--	--	--	--	--	S	Function unknown	unnamed protein product [Prunus armeniaca]
PaF106G0300013009.01	387	257	385	39	51	81	5.78782	4.59005	5.94258	0.631195	0.890912	1.21193	2.85509e-23	-2.24778	down	[Q]	Secondary metabolites biosynthesis, transport and catabolism	Molecular Function: diacylglycerol O-acyltransferase activity (GO:0004144);; Cellular Component: plasma membrane (GO:0005886);; Biological Process: triglyceride biosynthetic process (GO:0019432);; Molecular Function: long-chain-alcohol O-fatty-acyltransferase activity (GO:0047196);;	K20098|2.7e-64|mtr:MTR_4g078460|K20098 DNA excision repair protein ERCC-6-like 2 [EC:3.6.4.-] | (RefSeq) DNA repair and recombination RAD26-like protein, putative	--	--	--	WS/DGAT C-terminal domain	--	S	Function unknown	unnamed protein product [Prunus armeniaca]
PaF106G0400016502.01	53	61	56	4	2	2	1.32524	1.81621	1.45392	0.090106	0.056111	0.025347	1.73033e-11	-2.46695	down	[O]	Posttranslational modification, protein turnover, chaperones	Molecular Function: glutathione transferase activity (GO:0004364);; Cellular Component: cytoplasm (GO:0005737);; Biological Process: glutathione metabolic process (GO:0006749);;	K00799|1.8e-119|pmum:103325850|K00799 glutathione S-transferase [EC:2.5.1.18] | (RefSeq) probable glutathione S-transferase	Glutathione metabolism (ko00480)	[O]	Posttranslational modification, protein turnover, chaperones	Glutathione S-transferase, N-terminal domain	Probable glutathione S-transferase parC OS=Nicotiana tabacum OX=4097 GN=PARC PE=2 SV=1	O	Posttranslational modification, protein turnover, chaperones	PREDICTED: probable glutathione S-transferase [Prunus mume]
PaF106G0600024011.01	998	781	817	3246	2492	2879	8.08593	7.59892	6.79286	28.5422	23.514	23.3245	2.25243e-53	1.77999	up	[HI]	Coenzyme transport and metabolism;; Lipid transport and metabolism	Molecular Function: 1-deoxy-D-xylulose-5-phosphate synthase activity (GO:0008661);; Biological Process: terpenoid biosynthetic process (GO:0016114);; Molecular Function: transferase activity, transferring aldehyde or ketonic groups (GO:0016744);;	K01662|0.0e+00|pavi:110746271|K01662 1-deoxy-D-xylulose-5-phosphate synthase [EC:2.2.1.7] | (RefSeq) probable 1-deoxy-D-xylulose-5-phosphate synthase 2, chloroplastic isoform X1	Thiamine metabolism (ko00730);; Terpenoid backbone biosynthesis (ko00900)	[G]	Carbohydrate transport and metabolism	1-deoxy-D-xylulose-5-phosphate synthase	Probable 1-deoxy-D-xylulose-5-phosphate synthase 2, chloroplastic OS=Oryza sativa subsp. japonica OX=39947 GN=Os07g0190000 PE=2 SV=1	G	Carbohydrate transport and metabolism	unnamed protein product [Prunus armeniaca]
PaF106G0100003015.01	257	99	194	15	6	27	3.71089	1.71054	2.88353	0.229105	0.099745	0.390416	1.93769e-15	-2.56326	down	[G]	Carbohydrate transport and metabolism	Molecular Function: polygalacturonase activity (GO:0004650);; Cellular Component: extracellular region (GO:0005576);; Biological Process: carbohydrate metabolic process (GO:0005975);; Biological Process: cell wall organization (GO:0071555);;	K01213|1.7e-263|pmum:103321801|K01213 galacturan 1,4-alpha-galacturonidase [EC:3.2.1.67] | (RefSeq) polygalacturonase At1g48100	Pentose and glucuronate interconversions (ko00040)	--	--	Glycosyl hydrolases family 28	Polygalacturonase At1g48100 OS=Arabidopsis thaliana OX=3702 GN=At1g48100 PE=2 SV=1	G	Carbohydrate transport and metabolism	PREDICTED: polygalacturonase At1g48100 [Prunus mume]
PaF106G0400017421.01	168	129	101	251	276	336	1.00443	1.06976	0.620289	1.70213	1.99802	2.23871	8.95242e-08	1.10874	up	[T]	Signal transduction mechanisms	Molecular Function: protein kinase activity (GO:0004672);; Molecular Function: ATP binding (GO:0005524);; Cellular Component: endosome (GO:0005768);; Cellular Component: plasma membrane (GO:0005886);; Biological Process: receptor-mediated endocytosis (GO:0006898);; Biological Process: regulation of anion channel activity (GO:0010359);; Cellular Component: integral component of membrane (GO:001602…	K13420|2.2e-226|pavi:110766585|K13420 LRR receptor-like serine/threonine-protein kinase FLS2 [EC:2.7.11.1] | (RefSeq) LRR receptor-like serine/threonine-protein kinase FLS2	MAPK signaling pathway - plant (ko04016);; Plant-pathogen interaction (ko04626)	--	--	Protein kinase domain	LRR receptor-like serine/threonine-protein kinase FLS2 OS=Arabidopsis thaliana OX=3702 GN=FLS2 PE=1 SV=1	T	Signal transduction mechanisms	unnamed protein product [Prunus armeniaca]
PaF106G0100003928.01	1984	1593	2002	4867	4032	5049	43.4419	40.5731	43.7716	118.281	104.173	114.13	1.35841e-54	1.39056	up	[T]	Signal transduction mechanisms	Biological Process: response to acid chemical (GO:0001101);; Molecular Function: molecular_function (GO:0003674);; Molecular Function: catalytic activity (GO:0003824);; Biological Process: response to stress (GO:0006950);; Biological Process: biological_process (GO:0008150);; Biological Process: response to water deprivation (GO:0009414);; Biological Process: response to water (GO:0009415);; Biol…	K17991|3.3e-112|pmum:103321432|K17991 peroxygenase [EC:1.11.2.3] | (RefSeq) probable peroxygenase 4	Cutin, suberine and wax biosynthesis (ko00073)	--	--	Caleosin related protein	Probable peroxygenase 4 OS=Arabidopsis thaliana OX=3702 GN=PXG4 PE=1 SV=1	S	Function unknown	unnamed protein product [Prunus armeniaca]
PaF106G0200009704.01	274	278	282	84	90	132	3.13408	3.79529	2.84545	1.05431	1.14785	1.51639	4.46504e-10	-1.27012	down	[G]	Carbohydrate transport and metabolism	Molecular Function: beta-N-acetylhexosaminidase activity (GO:0004563);; Biological Process: carbohydrate metabolic process (GO:0005975);; Molecular Function: N-acetyl-beta-D-galactosaminidase activity (GO:0102148);;	K12373|3.1e-231|pmum:103343509|K12373 hexosaminidase [EC:3.2.1.52] | (RefSeq) beta-hexosaminidase 1	Other glycan degradation (ko00511);; Various types of N-glycan biosynthesis (ko00513);; Amino sugar and nucleotide sugar metabolism (ko00520);; Glycosaminoglycan degradation (ko00531);; Glycosphingolipid biosynthesis - globo and isoglobo series (ko00603);; Glycosphingolipid biosynthesis - ganglio series (ko00604)	[G]	Carbohydrate transport and metabolism	Glycosyl hydrolase family 20, catalytic domain	Beta-hexosaminidase 1 OS=Arabidopsis thaliana OX=3702 GN=HEXO1 PE=1 SV=1	G	Carbohydrate transport and metabolism	PREDICTED: beta-hexosaminidase 1 [Prunus mume]
PaF106G0300012916.01	110	56	76	12	30	21	1.8031	1.09399	1.28212	0.212685	0.569978	0.343552	0.000119322	-1.33536	down	[Q]	Secondary metabolites biosynthesis, transport and catabolism	Molecular Function: hydrolase activity (GO:0016787);;	K08726|9.8e-24|sbi:8071538|K08726 soluble epoxide hydrolase / lipid-phosphate phosphatase [EC:3.3.2.10 3.1.3.76] | (RefSeq) uncharacterized protein LOC8071538	Arachidonic acid metabolism (ko00590);; Peroxisome (ko04146)	[I]	Lipid transport and metabolism	alpha/beta hydrolase fold	--	I	Lipid transport and metabolism	unnamed protein product [Prunus armeniaca]
PaF106G0100003916.01	2042	1734	1620	529	587	858	25.2848	25.6906	20.6909	7.12219	8.4858	10.63	1.92432e-23	-1.33159	down	[G]	Carbohydrate transport and metabolism	Molecular Function: cellulase activity (GO:0008810);; Biological Process: cellulose catabolic process (GO:0030245);;	K01179|1.4e-292|pmum:103321421|K01179 endoglucanase [EC:3.2.1.4] | (RefSeq) endoglucanase 8	Starch and sucrose metabolism (ko00500)	--	--	Glycosyl hydrolase family 9	Endoglucanase 8 OS=Arabidopsis thaliana OX=3702 GN=CEL1 PE=2 SV=1	G	Carbohydrate transport and metabolism	PREDICTED: endoglucanase 8 [Prunus mume]
PaF106G0100006453.01	158	126	66	11	16	29	1.4722	1.40326	0.63438	0.10878	0.169837	0.265886	1.84528e-08	-1.89295	down	[P]	Inorganic ion transport and metabolism	Cellular Component: integral component of plasma membrane (GO:0005887);; Molecular Function: secondary active sulfate transmembrane transporter activity (GO:0008271);; Molecular Function: anion:anion antiporter activity (GO:0015301);;	K17470|0.0e+00|pmum:103319166|K17470 sulfate transporter 1, high-affinity | (RefSeq) sulfate transporter 1.3-like	--	[P]	Inorganic ion transport and metabolism	Sulfate permease family	Sulfate transporter 1.3 OS=Arabidopsis thaliana OX=3702 GN=SULTR1;3 PE=2 SV=1	P	Inorganic ion transport and metabolism	unnamed protein product [Prunus armeniaca]
PaF106G0500021374.01	94	48	85	162	180	182	2.26018	1.47237	2.32061	4.47449	5.50472	4.74958	2.44911e-06	1.16474	up	[R]	General function prediction only	Molecular Function: zinc ion binding (GO:0008270);; Molecular Function: oxidoreductase activity (GO:0016491);;	K00001|5.8e-19|pmum:103338849|K00001 alcohol dehydrogenase [EC:1.1.1.1] | (RefSeq) alcohol dehydrogenase-like 6 isoform X1	Glycolysis / Gluconeogenesis (ko00010);; Fatty acid degradation (ko00071);; Tyrosine metabolism (ko00350)	[Q]	Secondary metabolites biosynthesis, transport and catabolism	--	Alcohol dehydrogenase-like 6 OS=Arabidopsis thaliana OX=3702 GN=At5g24760 PE=2 SV=2	Q	Secondary metabolites biosynthesis, transport and catabolism	unnamed protein product [Prunus armeniaca]
PaF106G0200007121.01	72	72	62	267	160	266	0.880551	1.05023	0.777807	3.57425	2.30011	3.28384	7.15657e-12	1.62424	up	[C]	Energy production and conversion	Biological Process: cytokinin metabolic process (GO:0009690);; Molecular Function: cytokinin dehydrogenase activity (GO:0019139);; Molecular Function: FAD binding (GO:0071949);;	K00279|1.5e-311|pper:18784595|K00279 cytokinin dehydrogenase [EC:1.5.99.12] | (RefSeq) cytokinin dehydrogenase 6	Zeatin biosynthesis (ko00908)	[C]	Energy production and conversion	Cytokinin dehydrogenase 1, FAD and cytokinin binding	Cytokinin dehydrogenase 6 OS=Arabidopsis thaliana OX=3702 GN=CKX6 PE=2 SV=2	C	Energy production and conversion	unnamed protein product [Prunus armeniaca]
PaF106G0500020431.01	517	518	647	1973	1404	1933	6.39021	7.67021	8.31627	26.5331	20.2482	23.9474	1.21683e-33	1.67572	up	[QV]	Secondary metabolites biosynthesis, transport and catabolism;; Defense mechanisms	Molecular Function: iron ion binding (GO:0005506);; Cellular Component: membrane (GO:0016020);; Molecular Function: oxidoreductase activity, acting on paired donors, with incorporation or reduction of molecular oxygen, NAD(P)H as one donor, and incorporation of one atom of oxygen (GO:0016709);; Molecular Function: heme binding (GO:0020037);;	K00495|3.6e-283|pavi:110745870|K00495 phenylacetaldehyde oxime monooxygenase [EC:1.14.14.44] | (RefSeq) cytochrome P450 71A1-like	Cyanoamino acid metabolism (ko00460)	[Q]	Secondary metabolites biosynthesis, transport and catabolism	Cytochrome P450	Phenylacetaldehyde oxime monooxygenase CYP71AN24 OS=Prunus mume OX=102107 GN=CYP71AN24 PE=1 SV=1	Q	Secondary metabolites biosynthesis, transport and catabolism	PREDICTED: cytochrome P450 71A1-like [Prunus mume]
PaF106G0100004453.01	4259	3392	3967	1659	1631	2089	66.8125	63.6716	64.1989	28.3269	29.8614	32.812	4.16393e-38	-1.01342	down	[M]	Cell wall/membrane/envelope biogenesis	Molecular Function: catalytic activity (GO:0003824);;	K13082|9.0e-198|pper:18788884|K13082 bifunctional dihydroflavonol 4-reductase/flavanone 4-reductase [EC:1.1.1.219 1.1.1.234] | (RefSeq) bifunctional dihydroflavonol 4-reductase/flavanone 4-reductase	Flavonoid biosynthesis (ko00941)	[V]	Defense mechanisms	NAD dependent epimerase/dehydratase family	Bifunctional dihydroflavonol 4-reductase/flavanone 4-reductase OS=Pyrus communis OX=23211 GN=DFR PE=1 SV=1	V	Defense mechanisms	unnamed protein product [Prunus armeniaca]
PaF106G0100005974.01	77	67	82	266	140	159	2.15684	2.28295	2.39826	8.61809	4.74306	4.72587	8.02635e-06	1.21774	up	[G]	Carbohydrate transport and metabolism	Molecular Function: channel activity (GO:0015267);; Cellular Component: integral component of membrane (GO:0016021);;	K09874|1.3e-24|pavi:110748561|K09874 aquaporin NIP | (RefSeq) nodulin-26-like	--	[G]	Carbohydrate transport and metabolism	Major intrinsic protein	Putative aquaporin NIP4-1 OS=Arabidopsis thaliana OX=3702 GN=NIP4-1 PE=3 SV=1	G	Carbohydrate transport and metabolism	unnamed protein product [Prunus armeniaca]
PaF106G0100000980.01	11	6	9	177	177	240	0.232171	0.157178	0.196587	4.21124	4.50418	5.24125	2.72841e-40	3.70609	up	[O]	Posttranslational modification, protein turnover, chaperones	Molecular Function: protein serine/threonine kinase activity (GO:0004674);; Molecular Function: ATP binding (GO:0005524);; Cellular Component: cytoplasm (GO:0005737);; Biological Process: regulation of mitotic cell cycle (GO:0007346);; Biological Process: signal transduction by protein phosphorylation (GO:0023014);; Biological Process: stress-activated protein kinase signaling cascade (GO:0031098…	K20604|4.6e-103|pavi:110753466|K20604 mitogen-activated protein kinase kinase 9 [EC:2.7.12.2] | (RefSeq) mitogen-activated protein kinase kinase 9-like	MAPK signaling pathway - plant (ko04016)	[T]	Signal transduction mechanisms	Protein kinase domain	Mitogen-activated protein kinase kinase 9 OS=Arabidopsis thaliana OX=3702 GN=MKK9 PE=1 SV=1	T	Signal transduction mechanisms	unnamed protein product [Prunus armeniaca]
PaF106G0100005309.01	2476	1271	1498	630	666	594	16.485	10.0818	10.4587	4.50708	5.16505	3.87247	2.61347e-13	-1.27585	down	[M]	Cell wall/membrane/envelope biogenesis	Molecular Function: protein kinase activity (GO:0004672);; Molecular Function: ATP binding (GO:0005524);;	K17609|4.1e-297|cic:CICLE_v10010213mg|K17609 nucleoredoxin [EC:1.8.1.8] | (RefSeq) hypothetical protein	--	--	--	Protein kinase domain	U-box domain-containing protein 52 OS=Arabidopsis thaliana OX=3702 GN=PUB52 PE=2 SV=1	T	Signal transduction mechanisms	unnamed protein product [Prunus armeniaca]
PaF106G0200010558.01	1371	988	940	158	137	134	16.1855	13.9577	11.4408	2.02098	1.88415	1.58135	8.02236e-65	-2.70062	down	[G]	Carbohydrate transport and metabolism	Molecular Function: polygalacturonase activity (GO:0004650);; Cellular Component: extracellular region (GO:0005576);; Biological Process: carbohydrate metabolic process (GO:0005975);; Molecular Function: lyase activity (GO:0016829);; Biological Process: cell wall organization (GO:0071555);;	K01184|4.6e-28|csat:104772314|K01184 polygalacturonase [EC:3.2.1.15] | (RefSeq) probable polygalacturonase At3g15720	Pentose and glucuronate interconversions (ko00040)	--	--	Glycosyl hydrolases family 28	Probable polygalacturonase OS=Vitis vinifera OX=29760 GN=GSVIVT00026920001 PE=1 SV=1	G	Carbohydrate transport and metabolism	unnamed protein product [Prunus armeniaca]
PaF106G0600022175.01	495	354	309	806	852	1026	7.18478	6.14192	4.62431	12.7318	14.4302	14.9102	1.18377e-16	1.24893	up	[P]	Inorganic ion transport and metabolism	Molecular Function: cation transmembrane transporter activity (GO:0008324);; Cellular Component: integral component of membrane (GO:0016021);;	K14689|1.6e-195|pmum:103321821|K14689 solute carrier family 30 (zinc transporter), member 2 | (RefSeq) metal tolerance protein B	--	[P]	Inorganic ion transport and metabolism	Cation efflux family	Metal tolerance protein B OS=Arabidopsis thaliana OX=3702 GN=MTPB PE=2 SV=1	P	Inorganic ion transport and metabolism	unnamed protein product [Prunus armeniaca]
PaF106G0600023099.01	564	445	440	1216	1200	1517	7.91779	7.68837	6.63779	19.5771	20.8402	22.5728	3.58875e-41	1.49119	up	[R]	General function prediction only	Molecular Function: oxidoreductase activity (GO:0016491);;	K01456|3.8e-161|pper:18774423|K01456 peptide-N4-(N-acetyl-beta-glucosaminyl)asparagine amidase [EC:3.5.1.52] | (RefSeq) peptide-N(4)-(N-acetyl-beta- glucosaminyl)asparagine amidase isoform X1	Protein processing in endoplasmic reticulum (ko04141)	[C]	Energy production and conversion	Aldo/keto reductase family	Probable aldo-keto reductase 1 OS=Glycine max OX=3847 GN=AKR1 PE=2 SV=1	C	Energy production and conversion	hypothetical protein PRUPE_6G141300 [Prunus persica]
PaF106G0600021580.01	901	697	723	97	87	120	10.9598	10.1485	9.07614	1.27748	1.23266	1.4577	3.88849e-73	-2.71997	down	[G]	Carbohydrate transport and metabolism	Biological Process: carbohydrate metabolic process (GO:0005975);; Molecular Function: beta-glucosidase activity (GO:0008422);; Biological Process: response to salt stress (GO:0009651);; Biological Process: glucosinolate catabolic process (GO:0019762);;	K01188|5.1e-80|pper:18774589|K01188 beta-glucosidase [EC:3.2.1.21] | (RefSeq) beta-glucosidase 13	Cyanoamino acid metabolism (ko00460);; Starch and sucrose metabolism (ko00500);; Phenylpropanoid biosynthesis (ko00940)	[G]	Carbohydrate transport and metabolism	Glycosyl hydrolase family 1	Non-cyanogenic beta-glucosidase OS=Trifolium repens OX=3899 PE=1 SV=1	G	Carbohydrate transport and metabolism	hypothetical protein PRUPE_6G018800 [Prunus persica]
PaF106G0600023262.01	1298	1055	1370	209	233	295	13.5759	13.2011	14.7775	2.37693	2.84283	3.08946	3.3547e-65	-2.18113	down	[DPM]	Cell cycle control, cell division, chromosome partitioning;; Inorganic ion transport and metabolism;; Cell wall/membrane/envelope biogenesis	Molecular Function: copper ion binding (GO:0005507);; Cellular Component: extracellular region (GO:0005576);; Molecular Function: oxidoreductase activity (GO:0016491);;	K00423|4.1e-182|pmum:103330351|K00423 L-ascorbate oxidase [EC:1.10.3.3] | (RefSeq) L-ascorbate oxidase-like	Ascorbate and aldarate metabolism (ko00053)	[Q]	Secondary metabolites biosynthesis, transport and catabolism	Multicopper oxidase	L-ascorbate oxidase OS=Nicotiana tabacum OX=4097 GN=AAO PE=2 SV=1	Q	Secondary metabolites biosynthesis, transport and catabolism	unnamed protein product [Prunus armeniaca]
PaF106G0800032875.01	0	7	4	88	96	127	0	0.061232	0.025986	0.69618	0.815796	0.924507	9.75153e-21	3.17621	up	[R]	General function prediction only	Biological Process: signal transduction (GO:0007165);; Molecular Function: ADP binding (GO:0043531);;	K00695|9.4e-125|mtr:MTR_6g478030|K00695 sucrose synthase [EC:2.4.1.13] | (RefSeq) sucrose synthase	Starch and sucrose metabolism (ko00500)	--	--	TIR domain	Disease resistance protein RUN1 OS=Vitis rotundifolia OX=103349 GN=RUN1 PE=1 SV=1	S	Function unknown	TMV resistance protein N isoform X1 [Prunus persica]
PaF106G0600024494.01	96	74	103	259	276	325	0.599722	0.551758	0.726116	1.76211	2.06239	2.05746	2.58257e-17	1.62238	up	[M]	Cell wall/membrane/envelope biogenesis	Molecular Function: protein serine/threonine kinase activity (GO:0004674);; Molecular Function: ATP binding (GO:0005524);; Cellular Component: integral component of membrane (GO:0016021);;	K20181|2.9e-98|mtr:MTR_5g026090|K20181 vacuolar protein sorting-associated protein 18 | (RefSeq) vacuolar sorting-associated-like protein	--	--	--	Protein kinase domain	Probable LRR receptor-like serine/threonine-protein kinase At3g47570 OS=Arabidopsis thaliana OX=3702 GN=At3g47570 PE=2 SV=1	T	Signal transduction mechanisms	probable LRR receptor-like serine/threonine-protein kinase At3g47570 [Prunus dulcis]
PaF106G0700028629.01	89	76	59	242	269	327	1.87158	1.8619	1.27476	4.75375	5.3584	5.99411	3.23625e-18	1.81747	up	[T]	Signal transduction mechanisms	Molecular Function: protein kinase activity (GO:0004672);; Molecular Function: ATP binding (GO:0005524);;	K13414|5.4e-79|pop:7460930|K13414 mitogen-activated protein kinase kinase kinase 1 [EC:2.7.11.25] | (RefSeq) mitogen-activated protein kinase kinase kinase 1	MAPK signaling pathway - plant (ko04016);; Plant-pathogen interaction (ko04626)	[T]	Signal transduction mechanisms	Protein kinase domain	Mitogen-activated protein kinase kinase kinase 1 OS=Arabidopsis thaliana OX=3702 GN=MEKK1 PE=1 SV=2	T	Signal transduction mechanisms	PREDICTED: mitogen-activated protein kinase kinase kinase 1-like isoform X2 [Prunus mume]
PaF106G0600025380.01	620	619	633	1330	1063	1470	2.41968	2.87558	2.54176	5.63555	4.82857	5.74089	4.42572e-20	1.09306	up	[L]	Replication, recombination and repair	Molecular Function: nucleic acid binding (GO:0003676);; Molecular Function: DNA helicase activity (GO:0003678);; Molecular Function: ATP binding (GO:0005524);; Cellular Component: nucleus (GO:0005634);; Biological Process: DNA recombination (GO:0006310);;	K10900|3.3e-289|pmum:103344611|K10900 werner syndrome ATP-dependent helicase [EC:3.6.4.12] | (RefSeq) ATP-dependent DNA helicase Q-like SIM	--	[L]	Replication, recombination and repair	Helicase conserved C-terminal domain	ATP-dependent DNA helicase Q-like SIM OS=Arabidopsis thaliana OX=3702 GN=RECQSIM PE=2 SV=1	L	Replication, recombination and repair	unnamed protein product [Prunus armeniaca]
PaF106G0800032762.01	10	0	2	49	46	59	0.065837	0	0.013528	0.350001	0.352221	0.383224	1.28791e-07	2.01603	up	[R]	General function prediction only	Molecular Function: ADP binding (GO:0043531);;	K15078|8.1e-133|tcc:18614561|K15078 structure-specific endonuclease subunit SLX1 [EC:3.6.1.-] | (RefSeq) putative disease resistance protein RGA3	--	[T]	Signal transduction mechanisms	NB-ARC domain	Putative disease resistance protein RGA3 OS=Solanum bulbocastanum OX=147425 GN=RGA3 PE=2 SV=2	T	Signal transduction mechanisms	putative disease resistance protein RGA3 [Prunus persica]
PaF106G0600022172.01	98	101	88	0	6	16	2.9142	3.56382	2.67748	0	0.174309	0.468119	2.50259e-10	-2.29693	down	[O]	Posttranslational modification, protein turnover, chaperones	Molecular Function: serine-type endopeptidase activity (GO:0004252);;	--	--	--	--	Peptidase inhibitor I9	Subtilisin-like protease SBT4.3 OS=Arabidopsis thaliana OX=3702 GN=SBT4.3 PE=3 SV=1	O	Posttranslational modification, protein turnover, chaperones	LOW QUALITY PROTEIN: subtilisin-like protease SBT4.9 [Prunus persica]
PaF106G0800029993.01	88	57	87	192	222	241	0.430078	0.329963	0.437378	1.02386	1.26915	1.18136	3.1931e-11	1.44968	up	[V]	Defense mechanisms	Molecular Function: ATP binding (GO:0005524);; Cellular Component: plasma membrane (GO:0005886);; Cellular Component: integral component of membrane (GO:0016021);; Molecular Function: ATPase activity (GO:0016887);; Molecular Function: ATPase activity, coupled to transmembrane movement of substances (GO:0042626);; Biological Process: transmembrane transport (GO:0055085);;	K08712|1.1e-134|gsl:Gasu_29800|K08712 ATP-binding cassette, subfamily G (WHITE), member 2, SNQ2 | (RefSeq) ABC transporter, ATP-binding protein	ABC transporters (ko02010)	[Q]	Secondary metabolites biosynthesis, transport and catabolism	ABC-2 type transporter	Pleiotropic drug resistance protein 1 OS=Nicotiana tabacum OX=4097 GN=PDR1 PE=2 SV=1	Q	Secondary metabolites biosynthesis, transport and catabolism	pleiotropic drug resistance protein 1-like [Prunus avium]
PaF106G0400015976.01	467	252	310	960	806	934	5.41	3.49855	3.70443	12.1218	10.9149	10.8446	3.39128e-18	1.424	up	[G]	Carbohydrate transport and metabolism	Molecular Function: hydrolase activity, hydrolyzing O-glycosyl compounds (GO:0004553);; Biological Process: carbohydrate metabolic process (GO:0005975);;	K05350|9.4e-295|pmum:103326243|K05350 beta-glucosidase [EC:3.2.1.21] | (RefSeq) beta-glucosidase 18-like	Cyanoamino acid metabolism (ko00460);; Starch and sucrose metabolism (ko00500);; Phenylpropanoid biosynthesis (ko00940)	[G]	Carbohydrate transport and metabolism	Glycosyl hydrolase family 1	Beta-glucosidase 18 OS=Oryza sativa subsp. japonica OX=39947 GN=BGLU18 PE=3 SV=2	G	Carbohydrate transport and metabolism	PREDICTED: beta-glucosidase 18-like [Prunus mume]
PaF106G0800031073.01	98	77	68	112	340	265	1.40252	1.3235	1.00198	1.74764	5.69459	3.83177	8.17849e-06	1.35141	up	[QV]	Secondary metabolites biosynthesis, transport and catabolism;; Defense mechanisms	Molecular Function: monooxygenase activity (GO:0004497);; Molecular Function: iron ion binding (GO:0005506);; Cellular Component: integral component of membrane (GO:0016021);; Molecular Function: oxidoreductase activity, acting on paired donors, with incorporation or reduction of molecular oxygen (GO:0016705);; Molecular Function: heme binding (GO:0020037);;	K09843|2.4e-176|pmum:103335270|K09843 (+)-abscisic acid 8'-hydroxylase [EC:1.14.14.137] | (RefSeq) abscisic acid 8'-hydroxylase 4	Carotenoid biosynthesis (ko00906)	[QI]	Secondary metabolites biosynthesis, transport and catabolism;; Lipid transport and metabolism	Cytochrome P450	Abscisic acid 8'-hydroxylase 4 OS=Arabidopsis thaliana OX=3702 GN=CYP707A4 PE=2 SV=2	Q	Secondary metabolites biosynthesis, transport and catabolism	unnamed protein product [Prunus armeniaca]
PaF106G0100000450.01	767	684	666	218	224	318	9.91683	10.6013	8.83501	3.04229	3.35575	4.14461	5.50442e-21	-1.34817	down	[Q]	Secondary metabolites biosynthesis, transport and catabolism	Molecular Function: metal ion binding (GO:0046872);; Molecular Function: dioxygenase activity (GO:0051213);;	K13229|5.2e-82|ats:109766943|K13229 2,4-dihydroxy-1,4-benzoxazin-3-one-glucoside dioxygenase [EC:1.14.11.59] | (RefSeq) LOC109766943; DIBOA-glucoside dioxygenase BX6-like	Benzoxazinoid biosynthesis (ko00402)	[QR]	Secondary metabolites biosynthesis, transport and catabolism;; General function prediction only	2OG-Fe(II) oxygenase superfamily	1-aminocyclopropane-1-carboxylate oxidase homolog 1 OS=Arabidopsis thaliana OX=3702 GN=At1g06620 PE=2 SV=1	Q	Secondary metabolites biosynthesis, transport and catabolism	unnamed protein product [Prunus armeniaca]
PaF106G0100002809.01	70	65	60	164	126	210	1.668	1.86335	1.4782	4.31108	3.54113	5.07003	1.38952e-07	1.27232	up	[QV]	Secondary metabolites biosynthesis, transport and catabolism;; Defense mechanisms	Molecular Function: iron ion binding (GO:0005506);; Cellular Component: membrane (GO:0016020);; Molecular Function: oxidoreductase activity, acting on paired donors, with incorporation or reduction of molecular oxygen, NAD(P)H as one donor, and incorporation of one atom of oxygen (GO:0016709);; Molecular Function: heme binding (GO:0020037);;	K23810|1.3e-109|vvi:100855232|K23810 (E)-8-carboxylinalool synthase [EC:1.14.14.-] | (RefSeq) geraniol 8-hydroxylase	Monoterpenoid biosynthesis (ko00902)	[Q]	Secondary metabolites biosynthesis, transport and catabolism	Cytochrome P450	Geraniol 8-hydroxylase OS=Catharanthus roseus OX=4058 GN=CYP76B6 PE=1 SV=1	Q	Secondary metabolites biosynthesis, transport and catabolism	geraniol 8-hydroxylase [Prunus persica]
PaF106G0800032313.01	229	224	243	62	73	82	1.22324	1.46107	1.35	0.356157	0.451235	0.433315	5.66846e-12	-1.46238	down	[R]	General function prediction only	Biological Process: signal transduction (GO:0007165);; Molecular Function: ADP binding (GO:0043531);;	K00695|7.8e-127|mtr:MTR_6g478030|K00695 sucrose synthase [EC:2.4.1.13] | (RefSeq) sucrose synthase	Starch and sucrose metabolism (ko00500)	--	--	TIR domain	Disease resistance protein Roq1 OS=Nicotiana benthamiana OX=4100 GN=ROQ1 PE=1 SV=1	S	Function unknown	PREDICTED: TMV resistance protein N-like [Prunus mume]
PaF106G0800030239.01	57	36	55	197	174	161	3.10845	2.34252	3.15756	12.2566	11.4139	9.20749	6.27028e-12	1.71282	up	[C]	Energy production and conversion	Molecular Function: FMN binding (GO:0010181);; Molecular Function: oxidoreductase activity (GO:0016491);;	K05894|5.5e-34|pmum:103319317|K05894 12-oxophytodienoic acid reductase [EC:1.3.1.42] | (RefSeq) 12-oxophytodienoate reductase 2-like	alpha-Linolenic acid metabolism (ko00592)	[CR]	Energy production and conversion;; General function prediction only	NADH:flavin oxidoreductase / NADH oxidase family	12-oxophytodienoate reductase 2 OS=Arabidopsis thaliana OX=3702 GN=OPR2 PE=1 SV=2	C	Energy production and conversion	unnamed protein product [Prunus armeniaca]
PaF106G0100000451.01	884	744	802	354	334	432	12.3376	12.4239	11.545	5.37714	5.43046	6.03109	1.56174e-17	-1.00716	down	[Q]	Secondary metabolites biosynthesis, transport and catabolism	Molecular Function: metal ion binding (GO:0046872);; Molecular Function: dioxygenase activity (GO:0051213);;	K13229|5.2e-82|ats:109766943|K13229 2,4-dihydroxy-1,4-benzoxazin-3-one-glucoside dioxygenase [EC:1.14.11.59] | (RefSeq) LOC109766943; DIBOA-glucoside dioxygenase BX6-like	Benzoxazinoid biosynthesis (ko00402)	[QR]	Secondary metabolites biosynthesis, transport and catabolism;; General function prediction only	2OG-Fe(II) oxygenase superfamily	1-aminocyclopropane-1-carboxylate oxidase homolog 1 OS=Arabidopsis thaliana OX=3702 GN=At1g06620 PE=2 SV=1	Q	Secondary metabolites biosynthesis, transport and catabolism	PREDICTED: 1-aminocyclopropane-1-carboxylate oxidase homolog 1-like [Prunus mume]
PaF106G0200008699.01	398	240	231	119	108	136	6.75216	4.86516	4.04602	2.18997	2.12757	2.30256	1.41147e-06	-1.05905	down	[M]	Cell wall/membrane/envelope biogenesis	Molecular Function: oxidoreductase activity (GO:0016491);; Molecular Function: oxidoreductase activity, acting on the CH-OH group of donors, NAD or NADP as acceptor (GO:0016616);;	K13265|7.4e-117|gmx:100793687|K13265 vestitone reductase [EC:1.1.1.348] | (RefSeq) uncharacterized protein LOC100793687	Isoflavonoid biosynthesis (ko00943)	[V]	Defense mechanisms	NAD dependent epimerase/dehydratase family	Vestitone reductase OS=Medicago sativa OX=3879 PE=1 SV=1	V	Defense mechanisms	unnamed protein product [Prunus armeniaca]
PaF106G0500020680.01	1386	388	499	104	140	106	19.3628	6.60293	7.21206	1.64557	2.29272	1.58899	1.96892e-05	-1.60477	down	[G]	Carbohydrate transport and metabolism	Molecular Function: pectate lyase activity (GO:0030570);; Biological Process: pectin catabolic process (GO:0045490);; Molecular Function: metal ion binding (GO:0046872);;	K01728|2.5e-211|pmum:103338413|K01728 pectate lyase [EC:4.2.2.2] | (RefSeq) pectate lyase-like	Pentose and glucuronate interconversions (ko00040)	--	--	Pectate lyase	Pectate lyase OS=Lilium longiflorum OX=4690 PE=2 SV=1	G	Carbohydrate transport and metabolism	PREDICTED: pectate lyase-like [Prunus mume]
PaF106G0400015974.01	255	227	249	729	602	631	2.40415	2.55672	2.41718	7.48187	6.62683	5.9538	5.0083e-22	1.45399	up	[T]	Signal transduction mechanisms	Molecular Function: ATP binding (GO:0005524);; Cellular Component: plasma membrane (GO:0005886);; Cellular Component: integral component of membrane (GO:0016021);; Molecular Function: ATPase activity (GO:0016887);; Molecular Function: ATPase activity, coupled to transmembrane movement of substances (GO:0042626);; Biological Process: transmembrane transport (GO:0055085);;	K05681|2.0e-232|nau:109228191|K05681 ATP-binding cassette, subfamily G (WHITE), member 2 | (RefSeq) ABC transporter G family member 9-like	ABC transporters (ko02010)	[Q]	Secondary metabolites biosynthesis, transport and catabolism	ABC-2 type transporter	ABC transporter G family member 9 OS=Arabidopsis thaliana OX=3702 GN=ABCG9 PE=1 SV=2	Q	Secondary metabolites biosynthesis, transport and catabolism	unnamed protein product [Prunus armeniaca]
PaF106G0300013592.01	95	112	65	320	358	438	1.47886	2.07826	1.03642	5.4188	6.51287	6.83819	8.42129e-19	1.91314	up	[M]	Cell wall/membrane/envelope biogenesis	Molecular Function: protein serine/threonine kinase activity (GO:0004674);; Molecular Function: ATP binding (GO:0005524);; Cellular Component: integral component of membrane (GO:0016021);;	K13416|2.5e-51|lsv:111899011|K13416 brassinosteroid insensitive 1-associated receptor kinase 1 [EC:2.7.10.1 2.7.11.1] | (RefSeq) BRASSINOSTEROID INSENSITIVE 1-associated receptor kinase 1-like isoform X1	MAPK signaling pathway - plant (ko04016);; Plant hormone signal transduction (ko04075);; Plant-pathogen interaction (ko04626)	[T]	Signal transduction mechanisms	Protein kinase domain	LEAF RUST 10 DISEASE-RESISTANCE LOCUS RECEPTOR-LIKE PROTEIN KINASE-like 2.2 OS=Arabidopsis thaliana OX=3702 GN=LRK10L-2.2 PE=3 SV=2	T	Signal transduction mechanisms	LEAF RUST 10 DISEASE-RESISTANCE LOCUS RECEPTOR-LIKE PROTEIN KINASE-like 2.2 [Prunus dulcis]
PaF106G0200007074.01	3450	3258	3659	1482	1313	1447	50.3911	57.7249	56.2161	23.7251	22.0966	21.2432	6.34e-34	-1.17997	down	[E]	Amino acid transport and metabolism	Molecular Function: serine-type carboxypeptidase activity (GO:0004185);;	K16297|9.8e-186|pmum:103330716|K16297 serine carboxypeptidase-like clade II [EC:3.4.16.-] | (RefSeq) serine carboxypeptidase-like 40	--	[OE]	Posttranslational modification, protein turnover, chaperones;; Amino acid transport and metabolism	Serine carboxypeptidase	Serine carboxypeptidase-like 40 OS=Arabidopsis thaliana OX=3702 GN=SCPL40 PE=2 SV=2	O	Posttranslational modification, protein turnover, chaperones	PREDICTED: serine carboxypeptidase-like 40 [Prunus mume]
PaF106G0500020082.01	476	374	320	654	778	945	4.44919	4.20601	3.16267	6.7298	8.52795	8.86923	1.68366e-11	1.05804	up	[O]	Posttranslational modification, protein turnover, chaperones	Molecular Function: serine-type endopeptidase activity (GO:0004252);; Cellular Component: extracellular space (GO:0005615);;	K12663|4.0e-07|aip:107640222|K12663 Delta3,5-Delta2,4-dienoyl-CoA isomerase [EC:5.3.3.21] | (RefSeq) delta(3,5)-Delta(2,4)-dienoyl-CoA isomerase, peroxisomal-like	Peroxisome (ko04146)	--	--	Peptidase inhibitor I9	Subtilisin-like protease SBT3.5 OS=Arabidopsis thaliana OX=3702 GN=SBT3.5 PE=1 SV=1	O	Posttranslational modification, protein turnover, chaperones	PREDICTED: subtilisin-like protease SBT3.10 [Prunus mume]
PaF106G0600023075.01	803	986	951	57	214	125	20.4624	30.0701	24.9976	1.57841	6.35749	3.1773	1.62063e-05	-1.63785	down	[IQR]	Lipid transport and metabolism;; Secondary metabolites biosynthesis, transport and catabolism;; General function prediction only	Molecular Function: oxidoreductase activity (GO:0016491);;	K09841|4.3e-78|nto:104121195|K09841 xanthoxin dehydrogenase [EC:1.1.1.288] | (RefSeq) xanthoxin dehydrogenase-like	Carotenoid biosynthesis (ko00906)	[R]	General function prediction only	Enoyl-(Acyl carrier protein) reductase	Secoisolariciresinol dehydrogenase (Fragment) OS=Forsythia intermedia OX=55183 PE=1 SV=1	Q	Secondary metabolites biosynthesis, transport and catabolism	unnamed protein product [Prunus armeniaca]
PaF106G0300012442.01	380	325	289	121	108	160	4.35775	4.53992	3.49263	1.51576	1.44949	1.82798	2.78995e-10	-1.19197	down	[V]	Defense mechanisms	Cellular Component: vacuolar membrane (GO:0005774);; Molecular Function: solute:proton antiporter activity (GO:0015299);; Cellular Component: membrane (GO:0016020);; Cellular Component: integral component of membrane (GO:0016021);; Molecular Function: transmembrane transporter activity (GO:0022857);; Molecular Function: xenobiotic transporter activity (GO:0042910);;	K03327|1.1e-276|pmum:103328959|K03327 multidrug resistance protein, MATE family | (RefSeq) protein DETOXIFICATION 41-like	--	[R]	General function prediction only	MatE	Protein DETOXIFICATION 41 OS=Arabidopsis thaliana OX=3702 GN=DTX41 PE=2 SV=1	V	Defense mechanisms	unnamed protein product [Prunus armeniaca]
PaF106G0400015097.01	90	99	92	39	20	51	1.79774	2.35821	1.90428	0.844368	0.458149	1.01821	0.00111038	-1.03808	down	[I]	Lipid transport and metabolism	Biological Process: fatty acid biosynthetic process (GO:0006633);; Cellular Component: integral component of membrane (GO:0016021);; Molecular Function: oxidoreductase activity, acting on paired donors, with oxidation of a pair of donors resulting in the reduction of molecular oxygen to two molecules of water (GO:0016717);;	K20416|8.1e-179|pavi:110761594|K20416 palmitoyl-[glycerolipid] 7-desaturase [EC:1.14.19.42] | (RefSeq) palmitoyl-monogalactosyldiacylglycerol delta-7 desaturase, chloroplastic-like	--	[I]	Lipid transport and metabolism	Fatty acid desaturase	Palmitoyl-monogalactosyldiacylglycerol delta-7 desaturase, chloroplastic OS=Arabidopsis thaliana OX=3702 GN=ADS3 PE=1 SV=2	I	Lipid transport and metabolism	unnamed protein product [Prunus armeniaca]
PaF106G0800032700.01	333	319	296	108	155	155	4.8472	6.08443	4.79943	1.83119	2.73108	2.39485	3.95337e-07	-1.01723	down	[R]	General function prediction only	Molecular Function: alcohol dehydrogenase activity, zinc-dependent (GO:0004024);; Cellular Component: cytosol (GO:0005829);; Molecular Function: zinc ion binding (GO:0008270);; Biological Process: formaldehyde catabolic process (GO:0046294);; Molecular Function: S-(hydroxymethyl)glutathione dehydrogenase activity (GO:0051903);;	K18857|2.8e-69|pmum:103336428|K18857 alcohol dehydrogenase class-P [EC:1.1.1.1] | (RefSeq) alcohol dehydrogenase	Glycolysis / Gluconeogenesis (ko00010);; Fatty acid degradation (ko00071);; Tyrosine metabolism (ko00350);; alpha-Linolenic acid metabolism (ko00592)	[Q]	Secondary metabolites biosynthesis, transport and catabolism	Zinc-binding dehydrogenase	Alcohol dehydrogenase OS=Fragaria ananassa OX=3747 GN=ADH PE=3 SV=2	Q	Secondary metabolites biosynthesis, transport and catabolism	unnamed protein product [Prunus armeniaca]
PaF106G0100004696.01	182	194	156	1338	1327	1484	1.26368	1.59423	1.10645	10.0626	10.7094	10.3166	8.98509e-111	2.94318	up	[ET]	Amino acid transport and metabolism;; Signal transduction mechanisms	Molecular Function: ligand-gated ion channel activity (GO:0015276);; Cellular Component: integral component of membrane (GO:0016021);;	K05387|0.0e+00|pmum:103320680|K05387 glutamate receptor, ionotropic, plant | (RefSeq) glutamate receptor 2.8-like	--	[PET]	Inorganic ion transport and metabolism;; Amino acid transport and metabolism;; Signal transduction mechanisms	Ligand-gated ion channel	Glutamate receptor 2.8 OS=Arabidopsis thaliana OX=3702 GN=GLR2.8 PE=2 SV=2	--	--	unnamed protein product [Prunus armeniaca]
PaF106G0800029853.01	31	11	16	77	74	62	1.18699	0.502909	0.627984	3.2473	3.355	2.38556	1.95777e-05	1.46912	up	[F]	Nucleotide transport and metabolism	Molecular Function: nucleoside diphosphate kinase activity (GO:0004550);; Biological Process: GTP biosynthetic process (GO:0006183);; Biological Process: UTP biosynthetic process (GO:0006228);; Biological Process: CTP biosynthetic process (GO:0006241);; Biological Process: cellular response to hydrogen peroxide (GO:0070301);;	K00940|9.1e-33|mdm:103439015|K00940 nucleoside-diphosphate kinase [EC:2.7.4.6] | (RefSeq) nucleoside diphosphate kinase 1	Purine metabolism (ko00230);; Pyrimidine metabolism (ko00240);; MAPK signaling pathway - plant (ko04016)	[F]	Nucleotide transport and metabolism	Nucleoside diphosphate kinase	Nucleoside diphosphate kinase 1 OS=Pisum sativum OX=3888 GN=NDPK1 PE=2 SV=1	F	Nucleotide transport and metabolism	unnamed protein product [Prunus armeniaca]
PaF106G0100002450.01	877	914	857	282	331	522	5.85489	7.29406	5.89985	2.0219	2.57112	3.49282	1.33158e-10	-1.09966	down	[L]	Replication, recombination and repair	--	K10706|8.7e-185|vvi:100262126|K10706 senataxin [EC:3.6.4.-] | (RefSeq) uncharacterized LOC100262126	--	[A]	RNA processing and modification	AAA domain	--	A	RNA processing and modification	hypothetical protein PRUPE_1G201900 [Prunus persica]
PaF106G0100000523.01	103	83	107	454	427	392	0.902588	0.863481	0.962209	4.32474	4.36431	3.43904	5.35418e-29	2.07194	up	[IR]	Lipid transport and metabolism;; General function prediction only	Molecular Function: long-chain-alcohol oxidase activity (GO:0046577);; Molecular Function: flavin adenine dinucleotide binding (GO:0050660);;	K17756|0.0e+00|pmum:103324068|K17756 long-chain-alcohol oxidase [EC:1.1.3.20] | (RefSeq) long-chain-alcohol oxidase FAO1	--	--	--	GMC oxidoreductase	Long-chain-alcohol oxidase FAO1 OS=Lotus japonicus OX=34305 GN=FAO1 PE=1 SV=1	C	Energy production and conversion	PREDICTED: long-chain-alcohol oxidase FAO1 [Prunus mume]
PaF106G0200010394.01	2109	1599	2161	555	535	649	28.6805	26.0331	30.3135	8.20475	8.4815	8.82917	1.51626e-53	-1.62867	down	[G]	Carbohydrate transport and metabolism	Molecular Function: alpha-L-fucosidase activity (GO:0004560);; Biological Process: carbohydrate metabolic process (GO:0005975);;	K01206|7.6e-299|pmum:103333294|K01206 alpha-L-fucosidase [EC:3.2.1.51] | (RefSeq) alpha-L-fucosidase 1-like	Other glycan degradation (ko00511)	[G]	Carbohydrate transport and metabolism	Alpha-L-fucosidase	Alpha-L-fucosidase 1 OS=Arabidopsis thaliana OX=3702 GN=FUC1 PE=1 SV=2	G	Carbohydrate transport and metabolism	unnamed protein product [Prunus armeniaca]
PaF106G0100000441.01	382	288	371	74	84	124	6.98994	6.30891	6.99732	1.45843	1.7891	2.25866	1.10286e-17	-1.6714	down	[Q]	Secondary metabolites biosynthesis, transport and catabolism	Molecular Function: oxidoreductase activity (GO:0016491);; Molecular Function: metal ion binding (GO:0046872);;	K13229|8.9e-82|sita:101778204|K13229 2,4-dihydroxy-1,4-benzoxazin-3-one-glucoside dioxygenase [EC:1.14.11.59] | (RefSeq) DIBOA-glucoside dioxygenase BX6	Benzoxazinoid biosynthesis (ko00402)	[QR]	Secondary metabolites biosynthesis, transport and catabolism;; General function prediction only	2OG-Fe(II) oxygenase superfamily	1-aminocyclopropane-1-carboxylate oxidase homolog 1 OS=Arabidopsis thaliana OX=3702 GN=At1g06620 PE=2 SV=1	Q	Secondary metabolites biosynthesis, transport and catabolism	unnamed protein product [Prunus armeniaca]
PaF106G0200007328.01	339	258	232	91	93	121	1.34467	1.18641	0.942957	0.399964	0.447353	0.443437	1.15204e-09	-1.25035	down	[R]	General function prediction only	Molecular Function: ADP binding (GO:0043531);;	K12818|1.3e-209|mtr:MTR_0267s0070|K12818 ATP-dependent RNA helicase DHX8/PRP22 [EC:3.6.4.13] | (RefSeq) NB-ARC domain disease resistance protein, putative	Spliceosome (ko03040)	[T]	Signal transduction mechanisms	NB-ARC domain	Putative disease resistance RPP13-like protein 1 OS=Arabidopsis thaliana OX=3702 GN=RPPL1 PE=3 SV=1	T	Signal transduction mechanisms	PREDICTED: putative disease resistance RPP13-like protein 1 [Prunus mume]
PaF106G0600025229.01	19	19	4	60	102	88	0.204417	0.339373	0.041221	0.973856	1.82536	1.25671	5.44034e-07	1.7976	up	[M]	Cell wall/membrane/envelope biogenesis	Biological Process: galactose metabolic process (GO:0006012);; Molecular Function: inositol 3-alpha-galactosyltransferase activity (GO:0047216);;	K18819|1.4e-182|pmum:103344415|K18819 inositol 3-alpha-galactosyltransferase [EC:2.4.1.123] | (RefSeq) galactinol synthase 2	Galactose metabolism (ko00052)	[G]	Carbohydrate transport and metabolism	Glycosyl transferase family 8	Galactinol synthase 2 OS=Solanum lycopersicum OX=4081 GN=GOLS2 PE=2 SV=1	G	Carbohydrate transport and metabolism	hypothetical protein PRUPE_6G309400 [Prunus persica]
PaF106G0300012173.01	1392	1107	1293	369	341	483	28.1349	26.7694	26.9424	8.11745	8.04487	9.75858	3.72737e-43	-1.54784	down	[F]	Nucleotide transport and metabolism	Molecular Function: thymidine kinase activity (GO:0004797);; Molecular Function: ATP binding (GO:0005524);; Biological Process: double-strand break repair (GO:0006302);; Biological Process: response to UV-C (GO:0010225);; Molecular Function: identical protein binding (GO:0042802);; Biological Process: thymidine metabolic process (GO:0046104);; Biological Process: DNA biosynthetic process (GO:0071…	K00857|1.7e-151|pmum:103329224|K00857 thymidine kinase [EC:2.7.1.21] | (RefSeq) thymidine kinase a	Pyrimidine metabolism (ko00240)	[F]	Nucleotide transport and metabolism	Thymidine kinase	Thymidine kinase OS=Oryza sativa subsp. japonica OX=39947 GN=TK PE=2 SV=2	F	Nucleotide transport and metabolism	PREDICTED: thymidine kinase a [Prunus mume]
Prunus_sibirica_newGene_267	14	16	6	358	304	417	0.184261	0.265335	0.086786	5.49654	5.00027	5.87949	8.52998e-66	4.25033	up	[M]	Cell wall/membrane/envelope biogenesis	Molecular Function: protein serine/threonine kinase activity (GO:0004674);; Molecular Function: ATP binding (GO:0005524);; Biological Process: recognition of pollen (GO:0048544);;	K24104|2.5e-63|thj:104799061|K24104 GPN-loop GTPase | (RefSeq) LOW QUALITY PROTEIN: uncharacterized protein LOC104799061	--	--	--	Protein tyrosine and serine/threonine kinase	G-type lectin S-receptor-like serine/threonine-protein kinase At1g61500 OS=Arabidopsis thaliana OX=3702 GN=At1g61500 PE=2 SV=2	S	Function unknown	LOW QUALITY PROTEIN: uncharacterized protein LOC18781188 [Prunus persica]
PaF106G0200008474.01	91	89	96	25	27	40	0.640741	0.720096	0.696667	0.183952	0.218909	0.268328	2.99822e-05	-1.24452	down	[J]	Translation, ribosomal structure and biogenesis	Molecular Function: tRNA binding (GO:0000049);; Molecular Function: methionine-tRNA ligase activity (GO:0004825);; Molecular Function: ATP binding (GO:0005524);; Biological Process: methionyl-tRNA aminoacylation (GO:0006431);;	K01874|1.1e-311|pmum:103331646|K01874 methionyl-tRNA synthetase [EC:6.1.1.10] | (RefSeq) probable methionine--tRNA ligase	Selenocompound metabolism (ko00450);; Aminoacyl-tRNA biosynthesis (ko00970)	[J]	Translation, ribosomal structure and biogenesis	tRNA synthetases class I (M)	Probable methionine--tRNA ligase OS=Oryza sativa subsp. japonica OX=39947 GN=Os06g0508700 PE=2 SV=2	J	Translation, ribosomal structure and biogenesis	unnamed protein product [Prunus armeniaca]
PaF106G0200007810.01	46	47	44	120	157	161	0.57857	0.744917	0.57919	1.72114	2.31173	2.0429	1.9964e-09	1.53425	up	[QV]	Secondary metabolites biosynthesis, transport and catabolism;; Defense mechanisms	Molecular Function: monooxygenase activity (GO:0004497);; Molecular Function: iron ion binding (GO:0005506);; Cellular Component: integral component of membrane (GO:0016021);; Molecular Function: oxidoreductase activity, acting on paired donors, with incorporation or reduction of molecular oxygen (GO:0016705);; Molecular Function: heme binding (GO:0020037);;	K23806|2.7e-92|vvi:100246293|K23806 alpha-guaiene 2-oxidase | (RefSeq) premnaspirodiene oxygenase-like	--	[Q]	Secondary metabolites biosynthesis, transport and catabolism	Cytochrome P450	Premnaspirodiene oxygenase OS=Hyoscyamus muticus OX=35626 GN=CYP71D55 PE=1 SV=1	Q	Secondary metabolites biosynthesis, transport and catabolism	premnaspirodiene oxygenase-like [Prunus dulcis]
PaF106G0300011925.01	33	13	11	928	912	1235	0.253801	0.11564	0.096874	8.38352	8.66884	10.2775	1.16112e-146	5.28602	up	[T]	Signal transduction mechanisms	Molecular Function: protein serine/threonine kinase activity (GO:0004674);; Molecular Function: ATP binding (GO:0005524);; Cellular Component: plasma membrane (GO:0005886);; Biological Process: protein phosphorylation (GO:0006468);; Biological Process: recognition of pollen (GO:0048544);;	K24104|4.7e-77|thj:104799061|K24104 GPN-loop GTPase | (RefSeq) LOW QUALITY PROTEIN: uncharacterized protein LOC104799061	--	--	--	Protein tyrosine and serine/threonine kinase	G-type lectin S-receptor-like serine/threonine-protein kinase At4g03230 OS=Arabidopsis thaliana OX=3702 GN=At4g03230 PE=3 SV=3	T	Signal transduction mechanisms	G-type lectin S-receptor-like serine/threonine-protein kinase B120 isoform X3 [Prunus avium]
PaF106G0100002461.01	150	122	184	271	306	377	0.973358	0.94571	1.22957	1.91114	2.3239	2.45294	2.57921e-08	1.07298	up	[L]	Replication, recombination and repair	Molecular Function: helicase activity (GO:0004386);;	K10706|2.2e-195|rcu:8277867|K10706 senataxin [EC:3.6.4.-] | (RefSeq) probable helicase senataxin isoform X1	--	[A]	RNA processing and modification	AAA domain	Regulator of nonsense transcripts 1 homolog OS=Arabidopsis thaliana OX=3702 GN=UPF1 PE=1 SV=2	A	RNA processing and modification	helicase SEN1-like [Prunus dulcis]
PaF106G0200009874.01	310	315	307	73	118	108	2.06393	1.90379	1.85914	0.397783	1.27147	0.688577	4.04203e-11	-1.41903	down	[O]	Posttranslational modification, protein turnover, chaperones	Molecular Function: serine-type endopeptidase activity (GO:0004252);;	K15333|3.0e-67|nsy:104224633|K15333 tRNA guanosine-2'-O-methyltransferase [EC:2.1.1.34] | (RefSeq) uncharacterized protein LOC104224633	--	--	--	Subtilase family	Cucumisin OS=Cucumis melo OX=3656 PE=1 SV=1	O	Posttranslational modification, protein turnover, chaperones	PREDICTED: cucumisin-like [Prunus mume]
PaF106G0400016431.01	213	206	204	32	27	34	2.52877	2.91726	2.49865	0.413214	0.361843	0.404072	6.37363e-23	-2.34837	down	[QV]	Secondary metabolites biosynthesis, transport and catabolism;; Defense mechanisms	Molecular Function: monooxygenase activity (GO:0004497);; Molecular Function: iron ion binding (GO:0005506);; Molecular Function: oxidoreductase activity, acting on paired donors, with incorporation or reduction of molecular oxygen (GO:0016705);; Molecular Function: heme binding (GO:0020037);;	K07426|2.5e-62|cpep:111792333|K07426 cytochrome P450 family 4 subfamily B polypeptide 1 [EC:1.14.14.1] | (RefSeq) cytochrome P450 CYP72A219-like	--	[QI]	Secondary metabolites biosynthesis, transport and catabolism;; Lipid transport and metabolism	Cytochrome P450	Cytochrome P450 CYP72A219 OS=Panax ginseng OX=4054 PE=2 SV=1	Q	Secondary metabolites biosynthesis, transport and catabolism	unnamed protein product [Prunus armeniaca]
PaF106G0400015367.01	21	17	24	64	101	82	0.197959	0.194566	0.232849	0.67276	1.15005	0.791624	4.64032e-07	1.62079	up	[IQR]	Lipid transport and metabolism;; Secondary metabolites biosynthesis, transport and catabolism;; General function prediction only	Cellular Component: membrane (GO:0016020);; Biological Process: oxidation-reduction process (GO:0055114);;	K15095|2.0e-190|mdm:103417586|K15095 (+)-neomenthol dehydrogenase [EC:1.1.1.208] | (RefSeq) (-)-isopiperitenone reductase-like	Monoterpenoid biosynthesis (ko00902)	[Q]	Secondary metabolites biosynthesis, transport and catabolism	short chain dehydrogenase	(+)-neomenthol dehydrogenase OS=Arabidopsis thaliana OX=3702 GN=SDR1 PE=1 SV=1	Q	Secondary metabolites biosynthesis, transport and catabolism	uncharacterized protein LOC18779716 isoform X2 [Prunus persica]
PaF106G0600024672.01	1433	1517	1658	3429	3014	3382	16.1383	20.4423	19.2531	42.031	39.6167	38.1327	1.78498e-25	1.14973	up	[E]	Amino acid transport and metabolism	Cellular Component: plasma membrane (GO:0005886);; Molecular Function: peptide:proton symporter activity (GO:0015333);; Cellular Component: integral component of membrane (GO:0016021);; Molecular Function: oligopeptide transmembrane transporter activity (GO:0035673);; Molecular Function: peptide transmembrane transporter activity (GO:1904680);;	K14638|1.5e-192|cpep:111803733|K14638 solute carrier family 15 (peptide/histidine transporter), member 3/4 | (RefSeq) protein NRT1/ PTR FAMILY 2.8-like	--	[E]	Amino acid transport and metabolism	POT family	Protein NRT1/ PTR FAMILY 2.8 OS=Arabidopsis thaliana OX=3702 GN=NPF2.8 PE=2 SV=2	E	Amino acid transport and metabolism	unnamed protein product [Prunus armeniaca]
PaF106G0400016458.01	473	363	547	575	1152	1185	7.92329	7.28304	9.45865	10.4824	22.5435	19.8973	6.03454e-07	1.06738	up	[Q]	Secondary metabolites biosynthesis, transport and catabolism	Biological Process: response to light stimulus (GO:0009416);; Biological Process: gibberellin catabolic process (GO:0045487);; Molecular Function: metal ion binding (GO:0046872);; Molecular Function: dioxygenase activity (GO:0051213);; Molecular Function: C-19 gibberellin 2-beta-dioxygenase activity (GO:0052634);;	K04125|5.7e-138|pmum:103325827|K04125 gibberellin 2beta-dioxygenase [EC:1.14.11.13] | (RefSeq) gibberellin 2-beta-dioxygenase 1-like	Diterpenoid biosynthesis (ko00904)	[QR]	Secondary metabolites biosynthesis, transport and catabolism;; General function prediction only	non-haem dioxygenase in morphine synthesis N-terminal	Gibberellin 2-beta-dioxygenase 1 OS=Pisum sativum OX=3888 GN=GA2OX1 PE=1 SV=1	Q	Secondary metabolites biosynthesis, transport and catabolism	PREDICTED: gibberellin 2-beta-dioxygenase 1-like [Prunus mume]
PaF106G0400015123.01	70	49	59	20	7	14	0.969958	0.805022	0.836655	0.296617	0.102471	0.188826	8.26063e-05	-1.41291	down	[Q]	Secondary metabolites biosynthesis, transport and catabolism	Molecular Function: diacylglycerol O-acyltransferase activity (GO:0004144);; Cellular Component: plasma membrane (GO:0005886);; Biological Process: triglyceride biosynthetic process (GO:0019432);; Molecular Function: long-chain-alcohol O-fatty-acyltransferase activity (GO:0047196);;	K20098|4.1e-76|mtr:MTR_4g078460|K20098 DNA excision repair protein ERCC-6-like 2 [EC:3.6.4.-] | (RefSeq) DNA repair and recombination RAD26-like protein, putative	--	--	--	WS/DGAT C-terminal domain	--	S	Function unknown	unnamed protein product [Prunus armeniaca]
PaF106G0100001314.01	95	83	72	182	225	273	1.4629	1.53174	1.15328	3.0704	4.07455	4.24503	2.43455e-10	1.38639	up	[Q]	Secondary metabolites biosynthesis, transport and catabolism	Molecular Function: oxidoreductase activity (GO:0016491);; Molecular Function: metal ion binding (GO:0046872);;	K04125|6.5e-193|pmum:103323224|K04125 gibberellin 2beta-dioxygenase [EC:1.14.11.13] | (RefSeq) gibberellin 2-beta-dioxygenase 2-like	Diterpenoid biosynthesis (ko00904)	[QR]	Secondary metabolites biosynthesis, transport and catabolism;; General function prediction only	2OG-Fe(II) oxygenase superfamily	Gibberellin 2-beta-dioxygenase 2 OS=Pisum sativum OX=3888 GN=GA2OX2 PE=2 SV=1	Q	Secondary metabolites biosynthesis, transport and catabolism	unnamed protein product [Prunus armeniaca]
PaF106G0700027045.01	86	46	51	16	15	19	1.22192	0.772375	0.742086	0.238012	0.239794	0.260701	0.000216586	-1.29129	down	[P]	Inorganic ion transport and metabolism	Cellular Component: integral component of plasma membrane (GO:0005887);; Molecular Function: ammonium transmembrane transporter activity (GO:0008519);; Biological Process: nitrogen utilization (GO:0019740);;	K03320|3.4e-267|pmum:103340451|K03320 ammonium transporter, Amt family | (RefSeq) ammonium transporter 3 member 1-like	--	[P]	Inorganic ion transport and metabolism	Ammonium Transporter Family	Ammonium transporter 2 member 3 OS=Medicago truncatula OX=3880 GN=AMT2-3 PE=2 SV=2	P	Inorganic ion transport and metabolism	unnamed protein product [Prunus armeniaca]
PaF106G0300011264.01	266	266	273	460	483	635	3.54067	4.27347	3.71504	6.62666	7.49326	8.43773	2.33745e-11	1.00414	up	[T]	Signal transduction mechanisms	Molecular Function: transmembrane receptor protein serine/threonine kinase activity (GO:0004675);; Molecular Function: ATP binding (GO:0005524);; Cellular Component: plasma membrane (GO:0005886);; Biological Process: protein phosphorylation (GO:0006468);;	K13435|4.0e-51|spen:107018783|K13435 serine/threonine-protein kinase Pto | (RefSeq) receptor-like protein kinase HERK 1 isoform X2	Plant-pathogen interaction (ko04626)	[T]	Signal transduction mechanisms	Protein kinase domain	Nodulation receptor kinase OS=Medicago truncatula OX=3880 GN=NORK PE=1 SV=2	T	Signal transduction mechanisms	hypothetical protein PRUPE_3G282300, partial [Prunus persica]
PaF106G0100001072.01	185	86	125	26	44	28	2.47651	1.35587	1.70563	0.372058	0.672986	0.367024	1.20966e-06	-1.50488	down	[V]	Defense mechanisms	Molecular Function: antiporter activity (GO:0015297);; Cellular Component: membrane (GO:0016020);; Cellular Component: integral component of membrane (GO:0016021);; Molecular Function: transmembrane transporter activity (GO:0022857);; Molecular Function: xenobiotic transporter activity (GO:0042910);;	K03327|1.7e-263|pmum:103323449|K03327 multidrug resistance protein, MATE family | (RefSeq) protein DETOXIFICATION 16-like	--	[R]	General function prediction only	MatE	Protein DETOXIFICATION 16 OS=Arabidopsis thaliana OX=3702 GN=DTX16 PE=2 SV=1	V	Defense mechanisms	unnamed protein product [Prunus armeniaca]
PaF106G0800029443.01	1170	1113	1292	2419	2390	2782	13.6724	15.8501	16.0818	32.2481	33.7015	34.6945	8.12245e-35	1.15164	up	[H]	Coenzyme transport and metabolism	Biological Process: biological_process (GO:0008150);; Biological Process: response to radiation (GO:0009314);; Biological Process: response to light stimulus (GO:0009416);; Biological Process: response to abiotic stimulus (GO:0009628);; Biological Process: response to endogenous stimulus (GO:0009719);; Biological Process: response to hormone (GO:0009725);; Biological Process: response to auxin (G…	K14487|0.0e+00|pmum:103333903|K14487 auxin responsive GH3 gene family | (RefSeq) putative indole-3-acetic acid-amido synthetase GH3.9	Plant hormone signal transduction (ko04075)	--	--	GH3 auxin-responsive promoter	Putative indole-3-acetic acid-amido synthetase GH3.9 OS=Arabidopsis thaliana OX=3702 GN=GH3.9 PE=2 SV=1	S	Function unknown	unnamed protein product [Prunus armeniaca]
PaF106G0700026639.01	2605	2047	1925	4189	4366	6306	18.5202	17.4121	14.1069	32.3956	36.2137	44.9736	1.43699e-25	1.2219	up	[G]	Carbohydrate transport and metabolism	Molecular Function: beta-galactosidase activity (GO:0004565);; Biological Process: carbohydrate metabolic process (GO:0005975);; Molecular Function: carbohydrate binding (GO:0030246);;	K12309|4.8e-218|csat:104711840|K12309 beta-galactosidase [EC:3.2.1.23] | (RefSeq) LOW QUALITY PROTEIN: beta-galactosidase 2	Galactose metabolism (ko00052);; Other glycan degradation (ko00511);; Glycosaminoglycan degradation (ko00531);; Sphingolipid metabolism (ko00600);; Glycosphingolipid biosynthesis - ganglio series (ko00604)	[G]	Carbohydrate transport and metabolism	Glycosyl hydrolases family 35	Beta-galactosidase OS=Malus domestica OX=3750 PE=1 SV=1	G	Carbohydrate transport and metabolism	unnamed protein product [Prunus armeniaca]
PaF106G0100002006.01	221	128	137	49	39	37	2.44532	1.68408	1.55714	0.579815	0.493495	0.405519	8.89779e-09	-1.57009	down	[C]	Energy production and conversion	Molecular Function: oxidoreductase activity (GO:0016491);; Molecular Function: FAD binding (GO:0071949);;	K22395|5.6e-110|cic:CICLE_v10007008mg|K22395 cinnamyl-alcohol dehydrogenase [EC:1.1.1.195] | (RefSeq) hypothetical protein	Phenylpropanoid biosynthesis (ko00940)	--	--	FAD binding domain	Berberine bridge enzyme-like 8 OS=Arabidopsis thaliana OX=3702 GN=At1g30700 PE=2 SV=1	C	Energy production and conversion	PREDICTED: reticuline oxidase-like protein [Prunus mume]
PaF106G0200008349.01	345	189	284	878	841	827	2.03934	1.32685	1.71175	5.73978	5.90622	5.01033	2.07361e-24	1.66179	up	[R]	General function prediction only	Biological Process: signal transduction (GO:0007165);; Molecular Function: ADP binding (GO:0043531);;	K00695|1.8e-114|mtr:MTR_6g478030|K00695 sucrose synthase [EC:2.4.1.13] | (RefSeq) sucrose synthase	Starch and sucrose metabolism (ko00500)	--	--	TIR domain	Disease resistance protein RUN1 OS=Vitis rotundifolia OX=103349 GN=RUN1 PE=1 SV=1	S	Function unknown	TMV resistance protein N isoform X2 [Prunus persica]
PaF106G0400018334.01	1462	860	1063	4195	3543	4359	17.0928	12.0557	12.8138	53.4245	48.4469	51.034	1.94721e-54	1.88517	up	[G]	Carbohydrate transport and metabolism	Cellular Component: integral component of membrane (GO:0016021);; Molecular Function: transmembrane transporter activity (GO:0022857);;	K14445|4.2e-295|pmum:103326982|K14445 solute carrier family 13 (sodium-dependent dicarboxylate transporter), member 2/3/5 | (RefSeq) tonoplast dicarboxylate transporter-like	--	[P]	Inorganic ion transport and metabolism	Sodium:sulfate symporter transmembrane region	Tonoplast dicarboxylate transporter OS=Arabidopsis thaliana OX=3702 GN=TDT PE=2 SV=2	P	Inorganic ion transport and metabolism	unnamed protein product [Prunus armeniaca]
PaF106G0300012323.01	312	260	238	90	117	128	4.45899	4.44587	3.50641	1.39351	1.95539	1.82602	1.00566e-07	-1.09537	down	[G]	Carbohydrate transport and metabolism	Molecular Function: UDP-glycosyltransferase activity (GO:0008194);; Cellular Component: intracellular membrane-bounded organelle (GO:0043231);; Molecular Function: quercetin 3-O-glucosyltransferase activity (GO:0080043);; Molecular Function: quercetin 7-O-glucosyltransferase activity (GO:0080044);;	K22706|6.1e-168|pmum:103319663|K22706 (R)-mandelonitrile beta-glucosyltransferase [EC:2.4.1.354] | (RefSeq) 7-deoxyloganetin glucosyltransferase-like	Cyanoamino acid metabolism (ko00460)	[GC]	Carbohydrate transport and metabolism;; Energy production and conversion	UDP-glucoronosyl and UDP-glucosyl transferase	7-deoxyloganetin glucosyltransferase OS=Catharanthus roseus OX=4058 GN=UGT85A23 PE=1 SV=1	--	--	7-deoxyloganetin glucosyltransferase-like [Prunus persica]
PaF106G0400016527.01	56	43	61	0	0	0	0.633614	0.571582	0.710092	0	0	0	1.21312e-14	-2.88396	down	[T]	Signal transduction mechanisms	Cellular Component: membrane (GO:0016020);; Cellular Component: integral component of membrane (GO:0016021);;	K15503|1.4e-44|hbr:110673220|K15503 serine/threonine-protein phosphatase 6 regulatory ankyrin repeat subunit B | (RefSeq) uncharacterized protein LOC110673220	--	[R]	General function prediction only	Ankyrin repeats (3 copies)	--	S	Function unknown	ankyrin repeat-containing protein At5g02620 [Prunus persica]
PaF106G0800031136.01	180	174	170	41	36	133	3.63374	4.19506	3.5476	0.90188	0.844802	2.69221	0.00183072	-1.01954	down	[I]	Lipid transport and metabolism	Biological Process: catabolic process (GO:0009056);; Molecular Function: hydrolase activity (GO:0016787);;	K20506|1.9e-74|egu:105060863|K20506 tuliposide A-converting enzyme [EC:4.2.99.22] | (RefSeq) tuliposide A-converting enzyme 2, chloroplastic-like	--	[V]	Defense mechanisms	alpha/beta hydrolase fold	2-hydroxyisoflavanone dehydratase OS=Glycyrrhiza echinata OX=46348 GN=HIDM PE=1 SV=1	V	Defense mechanisms	PREDICTED: 2-hydroxyisoflavanone dehydratase-like [Prunus mume]
PaF106G0100003029.01	65	117	125	15	32	24	2.85576	6.16122	5.71316	0.717056	1.62795	1.03282	8.91798e-06	-1.50961	down	[O]	Posttranslational modification, protein turnover, chaperones	Molecular Function: structural constituent of ribosome (GO:0003735);; Cellular Component: nucleus (GO:0005634);; Cellular Component: cytoplasm (GO:0005737);; Cellular Component: ribosome (GO:0005840);; Biological Process: translation (GO:0006412);; Biological Process: protein ubiquitination (GO:0016567);; Biological Process: modification-dependent protein catabolic process (GO:0019941);; Molecula…	K02977|1.4e-73|cic:CICLE_v10032969mg|K02977 ubiquitin-small subunit ribosomal protein S27Ae | (RefSeq) hypothetical protein	Ribosome (ko03010);; Ubiquitin mediated proteolysis (ko04120)	[J]	Translation, ribosomal structure and biogenesis	Ubiquitin family	Ubiquitin-40S ribosomal protein S27a OS=Solanum lycopersicum OX=4081 GN=UBI3 PE=1 SV=2	J	Translation, ribosomal structure and biogenesis	ubiquitin-40S ribosomal protein S27a-like [Solanum tuberosum]
PaF106G0300012375.01	333	253	195	435	546	602	4.63415	4.2117	2.80057	6.59531	8.87985	8.39973	4.32103e-08	1.03772	up	[G]	Carbohydrate transport and metabolism	Molecular Function: UDP-glycosyltransferase activity (GO:0008194);;	K22950|1.5e-94|fve:101295404|K22950 acylphloroglucinol glucosyltransferase [EC:2.4.1.358] | (RefSeq) anthocyanidin 3-O-glucosyltransferase 2-like	--	[GC]	Carbohydrate transport and metabolism;; Energy production and conversion	UDP-glucoronosyl and UDP-glucosyl transferase	UDP-glucose flavonoid 3-O-glucosyltransferase 6 OS=Fragaria ananassa OX=3747 GN=GT6 PE=1 SV=1	--	--	PREDICTED: UDP-glycosyltransferase 71A16-like [Prunus mume]
PaF106G0700026926.01	4578	3864	3795	738	784	832	33.6875	33.7206	28.4809	6.02971	6.7088	6.12382	4.34649e-128	-2.24937	down	[E]	Amino acid transport and metabolism	Cellular Component: plasma membrane (GO:0005886);; Molecular Function: ligand-gated ion channel activity (GO:0015276);; Cellular Component: integral component of membrane (GO:0016021);; Molecular Function: signaling receptor activity (GO:0038023);;	K05387|6.0e-150|pavi:110748851|K05387 glutamate receptor, ionotropic, plant | (RefSeq) glutamate receptor 3.6-like isoform X1	--	[PET]	Inorganic ion transport and metabolism;; Amino acid transport and metabolism;; Signal transduction mechanisms	Receptor family ligand binding region	Glutamate receptor 3.6 OS=Arabidopsis thaliana OX=3702 GN=GLR3.6 PE=2 SV=1	--	--	hypothetical protein PRUPE_7G184400 [Prunus persica]
PaF106G0700027595.01	84	69	86	211	200	143	0.913884	0.924276	0.996296	2.48188	2.76108	1.55738	5.07398e-06	1.16245	up	[QV]	Secondary metabolites biosynthesis, transport and catabolism;; Defense mechanisms	Molecular Function: iron ion binding (GO:0005506);; Cellular Component: membrane (GO:0016020);; Molecular Function: oxidoreductase activity, acting on paired donors, with incorporation or reduction of molecular oxygen, NAD(P)H as one donor, and incorporation of one atom of oxygen (GO:0016709);; Molecular Function: heme binding (GO:0020037);;	K12153|1.7e-206|pper:18770648|K12153 phenylalanine N-monooxygenase [EC:1.14.14.40] | (RefSeq) isoleucine N-monooxygenase 2	Cyanoamino acid metabolism (ko00460);; Glucosinolate biosynthesis (ko00966);; 2-Oxocarboxylic acid metabolism (ko01210)	[Q]	Secondary metabolites biosynthesis, transport and catabolism	Cytochrome P450	Tryptophan N-monooxygenase CYP79A68 OS=Prunus mume OX=102107 GN=CYP79A68 PE=1 SV=1	Q	Secondary metabolites biosynthesis, transport and catabolism	unnamed protein product [Prunus armeniaca]
PaF106G0400014718.01	15	14	25	190	146	187	0.175421	0.194518	0.293527	2.44373	2.00699	2.21311	8.42246e-25	2.8016	up	[R]	General function prediction only	Biological Process: signal transduction (GO:0007165);; Molecular Function: ADP binding (GO:0043531);;	K00695|3.7e-126|mtr:MTR_6g478030|K00695 sucrose synthase [EC:2.4.1.13] | (RefSeq) sucrose synthase	Starch and sucrose metabolism (ko00500)	--	--	TIR domain	Disease resistance protein RPV1 OS=Vitis rotundifolia OX=103349 GN=RPV1 PE=1 SV=1	--	--	PREDICTED: disease resistance protein TAO1-like [Prunus mume]
PaF106G0400016611.01	1092	1333	1521	282	201	239	9.09788	13.2923	13.0784	2.55083	1.95257	1.99266	1.77246e-39	-2.23778	down	[M]	Cell wall/membrane/envelope biogenesis	Molecular Function: protein serine/threonine kinase activity (GO:0004674);; Molecular Function: ATP binding (GO:0005524);; Cellular Component: plasma membrane (GO:0005886);; Biological Process: protein phosphorylation (GO:0006468);; Cellular Component: integral component of membrane (GO:0016021);; Biological Process: recognition of pollen (GO:0048544);;	K24104|5.0e-69|thj:104799061|K24104 GPN-loop GTPase | (RefSeq) LOW QUALITY PROTEIN: uncharacterized protein LOC104799061	--	--	--	Protein tyrosine and serine/threonine kinase	G-type lectin S-receptor-like serine/threonine-protein kinase At4g27290 OS=Arabidopsis thaliana OX=3702 GN=At4g27290 PE=3 SV=4	T	Signal transduction mechanisms	G-type lectin S-receptor-like serine/threonine-protein kinase At4g27290 isoform X1 [Prunus persica]
PaF106G0100001815.01	100	140	99	947	765	787	1.10777	1.85272	1.13094	11.4472	9.90784	8.74126	5.0781e-48	2.75059	up	[G]	Carbohydrate transport and metabolism	Biological Process: carbohydrate transport (GO:0008643);; Cellular Component: integral component of membrane (GO:0016021);; Molecular Function: transmembrane transporter activity (GO:0022857);;	K24193|1.4e-179|pper:18789685|K24193 MFS transporter, SP family, sugar:H+ symporter | (RefSeq) sugar transport protein 13	--	[R]	General function prediction only	Sugar (and other) transporter	Sugar transport protein MST4 OS=Oryza sativa subsp. japonica OX=39947 GN=MST4 PE=1 SV=1	U	Intracellular trafficking, secretion, and vesicular transport	PREDICTED: sugar transport protein 13-like [Prunus mume]
PaF106G0300013544.01	220	142	172	475	530	578	5.93306	3.84646	4.02592	13.2934	15.75	14.0121	1.92772e-23	1.58604	up	[E]	Amino acid transport and metabolism	Molecular Function: N2-acetyl-L-ornithine:2-oxoglutarate 5-aminotransferase activity (GO:0003992);; Molecular Function: copper ion binding (GO:0005507);; Biological Process: arginine biosynthetic process (GO:0006526);; Cellular Component: chloroplast stroma (GO:0009570);; Molecular Function: pyridoxal phosphate binding (GO:0030170);; Biological Process: defense response to bacterium (GO:0042742);…	K00818|9.1e-142|pmum:103328139|K00818 acetylornithine aminotransferase [EC:2.6.1.11] | (RefSeq) acetylornithine aminotransferase, mitochondrial	Arginine biosynthesis (ko00220);; 2-Oxocarboxylic acid metabolism (ko01210);; Biosynthesis of amino acids (ko01230)	[E]	Amino acid transport and metabolism	Aminotransferase class-III	Acetylornithine aminotransferase, chloroplastic/mitochondrial OS=Arabidopsis thaliana OX=3702 GN=WIN1 PE=1 SV=1	E	Amino acid transport and metabolism	PREDICTED: acetylornithine aminotransferase, mitochondrial [Prunus mume]
PaF106G0400016109.01	74	40	23	70	162	122	0.907988	0.637818	0.247171	1.08333	2.52355	1.68895	0.00156138	1.10468	up	[M]	Cell wall/membrane/envelope biogenesis	Molecular Function: protein kinase activity (GO:0004672);; Molecular Function: ATP binding (GO:0005524);;	K03283|1.6e-29|qsu:112017276|K03283 heat shock 70kDa protein 1/2/6/8 | (RefSeq) heat shock cognate 70 kDa protein 2-like	Spliceosome (ko03040);; Protein processing in endoplasmic reticulum (ko04141);; Endocytosis (ko04144)	--	--	Malectin domain	Probable LRR receptor-like serine/threonine-protein kinase At1g56130 OS=Arabidopsis thaliana OX=3702 GN=At1g56130 PE=2 SV=2	T	Signal transduction mechanisms	Hypothetical predicted protein [Prunus dulcis]
PaF106G0100006294.01	88	116	145	45	47	40	1.27949	2.01533	2.16785	0.707443	0.785148	0.582775	0.000283241	-1.08724	down	[R]	General function prediction only	Cellular Component: integral component of membrane (GO:0016021);; Molecular Function: oxidoreductase activity (GO:0016491);;	K22418|1.8e-181|pmum:103319342|K22418 11beta/17beta-hydroxysteroid dehydrogenase [EC:1.1.1.146 1.1.1.-] | (RefSeq) 11-beta-hydroxysteroid dehydrogenase-like 5	--	[Q]	Secondary metabolites biosynthesis, transport and catabolism	short chain dehydrogenase	11-beta-hydroxysteroid dehydrogenase B OS=Sesamum indicum OX=4182 GN=SOP3 PE=1 SV=1	Q	Secondary metabolites biosynthesis, transport and catabolism	unnamed protein product [Prunus armeniaca]
PaF106G0800030528.01	512	430	423	125	93	198	8.05319	8.09618	6.8613	2.12492	1.70082	3.11036	2.15189e-14	-1.52455	down	[QR]	Secondary metabolites biosynthesis, transport and catabolism;; General function prediction only	Molecular Function: O-methyltransferase activity (GO:0008171);; Molecular Function: S-adenosylmethionine-dependent methyltransferase activity (GO:0008757);; Biological Process: aromatic compound biosynthetic process (GO:0019438);; Biological Process: methylation (GO:0032259);; Molecular Function: protein dimerization activity (GO:0046983);;	K22588|1.5e-102|crb:17880076|K22588 acetylserotonin O-methyltransferase, plant [EC:2.1.1.4] | (RefSeq) xanthohumol 4'-O-methyltransferase	Tryptophan metabolism (ko00380)	[R]	General function prediction only	O-methyltransferase domain	Acetylserotonin O-methyltransferase OS=Arabidopsis thaliana OX=3702 GN=ASMT PE=1 SV=1	S	Function unknown	unnamed protein product [Prunus armeniaca]
PaF106G0800031239.01	28	47	42	125	90	119	0.427457	0.862884	0.663377	2.08291	1.60654	1.83415	1.26139e-05	1.29972	up	[Q]	Secondary metabolites biosynthesis, transport and catabolism	Molecular Function: metal ion binding (GO:0046872);; Molecular Function: dioxygenase activity (GO:0051213);;	K24028|6.2e-53|pda:103712793|K24028 salicylic acid 3-hydroxylase [EC:1.14.11.-] | (RefSeq) flavanone 3-dioxygenase 2-like	--	[QR]	Secondary metabolites biosynthesis, transport and catabolism;; General function prediction only	non-haem dioxygenase in morphine synthesis N-terminal	Probable 2-oxoglutarate-dependent dioxygenase At5g05600 OS=Arabidopsis thaliana OX=3702 GN=At5g05600 PE=2 SV=1	Q	Secondary metabolites biosynthesis, transport and catabolism	unnamed protein product [Prunus armeniaca]
PaF106G0200010648.01	23	23	41	86	52	78	0.607411	0.718968	1.13556	2.51315	1.60449	2.08945	0.00162861	1.06697	up	[G]	Carbohydrate transport and metabolism	Molecular Function: trehalose-phosphatase activity (GO:0004805);; Biological Process: trehalose biosynthetic process (GO:0005992);;	K01087|2.1e-130|pmum:103333663|K01087 trehalose 6-phosphate phosphatase [EC:3.1.3.12] | (RefSeq) probable trehalose-phosphate phosphatase C	Starch and sucrose metabolism (ko00500)	[G]	Carbohydrate transport and metabolism	Trehalose-phosphatase	Probable trehalose-phosphate phosphatase 2 OS=Oryza sativa subsp. japonica OX=39947 GN=TPP2 PE=1 SV=1	G	Carbohydrate transport and metabolism	unnamed protein product [Prunus armeniaca]
PaF106G0200007383.01	158	156	158	529	545	634	0.778848	0.922828	0.802919	2.84992	3.15167	3.14549	9.5236e-37	1.85877	up	[R]	General function prediction only	Molecular Function: ADP binding (GO:0043531);;	K12818|1.8e-198|mtr:MTR_0267s0070|K12818 ATP-dependent RNA helicase DHX8/PRP22 [EC:3.6.4.13] | (RefSeq) NB-ARC domain disease resistance protein, putative	Spliceosome (ko03040)	[T]	Signal transduction mechanisms	NB-ARC domain	Putative disease resistance RPP13-like protein 1 OS=Arabidopsis thaliana OX=3702 GN=RPPL1 PE=3 SV=1	T	Signal transduction mechanisms	PREDICTED: LOW QUALITY PROTEIN: putative disease resistance RPP13-like protein 1 [Prunus mume]
PaF106G0700026834.01	0	0	0	96	65	83	0	0	0	1.37834	0.990082	1.0853	9.92729e-24	3.59877	up	[GI]	Carbohydrate transport and metabolism;; Lipid transport and metabolism	Molecular Function: enzyme inhibitor activity (GO:0004857);; Molecular Function: pectinesterase activity (GO:0030599);; Biological Process: cell wall modification (GO:0042545);; Molecular Function: aspartyl esterase activity (GO:0045330);; Biological Process: pectin catabolic process (GO:0045490);;	K01051|1.1e-300|pmum:103340505|K01051 pectinesterase [EC:3.1.1.11] | (RefSeq) pectinesterase	Pentose and glucuronate interconversions (ko00040)	--	--	Pectinesterase	Probable pectinesterase/pectinesterase inhibitor 54 OS=Arabidopsis thaliana OX=3702 GN=PME54 PE=2 SV=1	G	Carbohydrate transport and metabolism	unnamed protein product [Prunus armeniaca]
PaF106G0800031008.01	108	74	66	17	4	9	1.57712	1.28955	0.987997	0.258635	0.068248	0.123704	1.07979e-08	-2.01403	down	[G]	Carbohydrate transport and metabolism	Molecular Function: UDP-glycosyltransferase activity (GO:0008194);;	K23260|7.6e-264|pper:18768382|K23260 scopoletin glucosyltransferase [EC:2.4.1.128] | (RefSeq) UDP-glucose flavonoid 3-O-glucosyltransferase 7	Phenylpropanoid biosynthesis (ko00940)	[GC]	Carbohydrate transport and metabolism;; Energy production and conversion	UDP-glucoronosyl and UDP-glucosyl transferase	UDP-glucose flavonoid 3-O-glucosyltransferase 7 OS=Fragaria ananassa OX=3747 GN=GT7 PE=1 SV=1	--	--	PREDICTED: scopoletin glucosyltransferase [Prunus dulcis]
PaF106G0800031807.01	248	182	214	61	43	79	4.72515	4.15612	4.2138	1.25154	0.956908	1.50454	1.29874e-11	-1.55719	down	[Q]	Secondary metabolites biosynthesis, transport and catabolism	Molecular Function: oxidoreductase activity (GO:0016491);; Molecular Function: metal ion binding (GO:0046872);;	K24028|4.5e-91|lja:Lj0g3v0213339.1|K24028 salicylic acid 3-hydroxylase [EC:1.14.11.-] | (RefSeq) Lj0g3v0213339.1; -	--	[QR]	Secondary metabolites biosynthesis, transport and catabolism;; General function prediction only	non-haem dioxygenase in morphine synthesis N-terminal	2-oxoglutarate-dependent dioxygenase 19 OS=Oryza sativa subsp. japonica OX=39947 GN=2ODD19 PE=1 SV=1	Q	Secondary metabolites biosynthesis, transport and catabolism	hypothetical protein Pyn_24989 [Prunus yedoensis var. nudiflora]
PaF106G0600022022.01	124	58	111	190	343	296	1.73236	0.963539	1.60782	2.89579	5.6213	4.15509	8.65483e-08	1.40082	up	[T]	Signal transduction mechanisms	Molecular Function: protein serine/threonine kinase activity (GO:0004674);; Molecular Function: ATP binding (GO:0005524);; Cellular Component: cytoplasm (GO:0005737);; Biological Process: regulation of mitotic cell cycle (GO:0007346);; Biological Process: chloroplast organization (GO:0009658);; Cellular Component: integral component of membrane (GO:0016021);; Biological Process: signal transducti…	K20716|1.3e-61|mus:104001041|K20716 mitogen-activated protein kinase kinase kinase 17/18 | (RefSeq) mitogen-activated protein kinase kinase kinase 3-like	MAPK signaling pathway - plant (ko04016)	[T]	Signal transduction mechanisms	Protein kinase domain	Mitogen-activated protein kinase kinase kinase 18 OS=Arabidopsis thaliana OX=3702 GN=MAPKKK18 PE=1 SV=1	T	Signal transduction mechanisms	PREDICTED: mitogen-activated protein kinase kinase kinase NPK1 [Prunus mume]
PaF106G0600021752.01	11310	9489	11646	2457	2239	2816	88.1918	88.5517	93.6673	20.8499	20.3732	21.9781	1.41273e-161	-2.00344	down	[G]	Carbohydrate transport and metabolism	Molecular Function: catalytic activity (GO:0003824);;	K06617|0.0e+00|pper:18774843|K06617 raffinose synthase [EC:2.4.1.82] | (RefSeq) probable galactinol--sucrose galactosyltransferase 1	Galactose metabolism (ko00052)	--	--	Raffinose synthase or seed imbibition protein Sip1	Probable galactinol--sucrose galactosyltransferase 1 OS=Arabidopsis thaliana OX=3702 GN=RFS1 PE=2 SV=1	S	Function unknown	unnamed protein product [Prunus armeniaca]
PaF106G0700028854.01	585	357	434	1046	1130	1048	11.5223	8.41201	8.81758	22.419	25.9814	20.6566	5.14929e-18	1.28396	up	[S]	Function unknown	Cellular Component: integral component of membrane (GO:0016021);;	--	--	--	--	Protein of unknown function, DUF599	--	S	Function unknown	unnamed protein product [Prunus armeniaca]
PaF106G0400017663.01	38	62	61	174	128	168	0.604182	1.19133	1.00167	3.03965	2.39065	2.70582	3.97641e-07	1.37925	up	[I]	Lipid transport and metabolism	Biological Process: lipid metabolic process (GO:0006629);; Molecular Function: phosphatidylcholine 1-acylhydrolase activity (GO:0008970);;	K16818|1.6e-50|egr:104446339|K16818 phospholipase A1 [EC:3.1.1.32] | (RefSeq) phospholipase A(1) DAD1, chloroplastic	Glycerophospholipid metabolism (ko00564);; alpha-Linolenic acid metabolism (ko00592)	[I]	Lipid transport and metabolism	Lipase (class 3)	Phospholipase A1-IIgamma OS=Arabidopsis thaliana OX=3702 GN=DSEL PE=1 SV=1	I	Lipid transport and metabolism	PREDICTED: phospholipase A1-IIgamma [Prunus mume]
PaF106G0500020293.01	376	422	269	93	162	201	3.81961	5.12741	2.81725	1.01834	1.91936	2.04047	4.96976e-05	-1.02684	down	[IQ]	Lipid transport and metabolism;; Secondary metabolites biosynthesis, transport and catabolism	Molecular Function: CoA-ligase activity (GO:0016405);;	K01904|3.3e-290|pavi:110745206|K01904 4-coumarate--CoA ligase [EC:6.2.1.12] | (RefSeq) 4-coumarate--CoA ligase-like 9 isoform X1	Ubiquinone and other terpenoid-quinone biosynthesis (ko00130);; Phenylpropanoid biosynthesis (ko00940)	[I]	Lipid transport and metabolism	AMP-binding enzyme	4-coumarate--CoA ligase-like 9 OS=Arabidopsis thaliana OX=3702 GN=4CLL9 PE=1 SV=2	I	Lipid transport and metabolism	4-coumarate--CoA ligase-like 9 [Prunus persica]
PaF106G0500020667.01	321	408	333	119	137	202	3.32969	5.07641	3.56543	1.34021	1.65343	2.09749	9.70636e-07	-1.05782	down	[T]	Signal transduction mechanisms	Molecular Function: protein serine/threonine kinase activity (GO:0004674);; Molecular Function: ATP binding (GO:0005524);; Cellular Component: integral component of membrane (GO:0016021);; Biological Process: cellulose biosynthetic process (GO:0030244);;	K13418|4.7e-77|pop:7486331|K13418 somatic embryogenesis receptor kinase 1 [EC:2.7.10.1 2.7.11.1] | (RefSeq) somatic embryogenesis receptor kinase 1	--	--	--	Protein kinase domain	LRR receptor-like serine/threonine-protein kinase FEI 1 OS=Arabidopsis thaliana OX=3702 GN=FEI1 PE=1 SV=1	T	Signal transduction mechanisms	unnamed protein product [Prunus armeniaca]
PaF106G0400016282.01	56	72	88	125	171	209	0.77267	1.22142	1.31655	2.01569	2.73739	4.48132	2.24547e-05	1.12321	up	[G]	Carbohydrate transport and metabolism	Molecular Function: hydrolase activity, hydrolyzing O-glycosyl compounds (GO:0004553);; Biological Process: carbohydrate metabolic process (GO:0005975);; Cellular Component: integral component of membrane (GO:0016021);;	K01188|4.8e-208|pper:18775538|K01188 beta-glucosidase [EC:3.2.1.21] | (RefSeq) beta-glucosidase 12	Cyanoamino acid metabolism (ko00460);; Starch and sucrose metabolism (ko00500);; Phenylpropanoid biosynthesis (ko00940)	[G]	Carbohydrate transport and metabolism	Glycosyl hydrolase family 1	Beta-glucosidase 12 OS=Oryza sativa subsp. indica OX=39946 GN=BGLU12 PE=3 SV=1	G	Carbohydrate transport and metabolism	beta-glucosidase 12 isoform X2 [Prunus persica]
PaF106G0100000577.01	50	56	60	179	181	206	0.309786	0.416186	0.382074	1.22888	1.32004	1.32613	3.28373e-13	1.66275	up	[R]	General function prediction only	Biological Process: defense response (GO:0006952);; Molecular Function: ADP binding (GO:0043531);;	K13457|1.2e-103|qsu:112007111|K13457 disease resistance protein RPM1 | (RefSeq) disease resistance protein RPM1-like	Plant-pathogen interaction (ko04626)	[T]	Signal transduction mechanisms	NB-ARC domain	Putative disease resistance protein At1g50180 OS=Arabidopsis thaliana OX=3702 GN=At1g50180 PE=3 SV=2	T	Signal transduction mechanisms	PREDICTED: putative disease resistance protein At1g50180 isoform X1 [Prunus mume]
PaF106G0600023442.01	29	22	32	67	60	86	1.45039	1.33729	1.64859	3.6711	3.53115	4.36391	0.00025535	1.1541	up	[S]	Function unknown	--	K09131|2.0e-60|pmum:103331170|K09131 uncharacterized protein | (RefSeq) UPF0235 protein C15orf40-like	--	[S]	Function unknown	Uncharacterised ACR, YggU family COG1872	--	S	Function unknown	UPF0235 protein C15orf40 homolog isoform X1 [Prunus dulcis]
PaF106G0600022919.01	2314	1201	1445	690	660	612	34.0501	20.8609	20.6432	13.207	12.2977	10.0483	2.20788e-11	-1.15246	down	[Q]	Secondary metabolites biosynthesis, transport and catabolism	Biological Process: lipid metabolic process (GO:0006629);; Molecular Function: fatty-acyl-CoA reductase (alcohol-forming) activity (GO:0080019);;	K13356|1.8e-115|pmum:103328293|K13356 alcohol-forming fatty acyl-CoA reductase [EC:1.2.1.84] | (RefSeq) fatty acyl-CoA reductase 3-like	Cutin, suberine and wax biosynthesis (ko00073);; Peroxisome (ko04146)	[I]	Lipid transport and metabolism	Male sterility protein	Fatty acyl-CoA reductase 3 OS=Arabidopsis thaliana OX=3702 GN=FAR3 PE=1 SV=1	I	Lipid transport and metabolism	PREDICTED: fatty acyl-CoA reductase 3-like [Prunus mume]
PaF106G0800031492.01	363	456	379	133	92	177	13.7084	20.6109	14.7676	5.4474	4.06236	6.68517	1.20999e-10	-1.38762	down	[J]	Translation, ribosomal structure and biogenesis	Molecular Function: structural constituent of ribosome (GO:0003735);; Cellular Component: mitochondrial large ribosomal subunit (GO:0005762);; Biological Process: translation (GO:0006412);; Molecular Function: large ribosomal subunit rRNA binding (GO:0070180);;	K02874|1.9e-93|pmum:107881423|K02874 large subunit ribosomal protein L14 | (RefSeq) 50S ribosomal protein HLP, mitochondrial-like	Ribosome (ko03010)	[J]	Translation, ribosomal structure and biogenesis	Ribosomal protein L14p/L23e	50S ribosomal protein HLP, mitochondrial OS=Arabidopsis thaliana OX=3702 GN=HLP PE=1 SV=1	J	Translation, ribosomal structure and biogenesis	PREDICTED: 50S ribosomal protein HLP, mitochondrial-like [Prunus mume]
PaF106G0300013109.01	2	0	0	117	99	172	0.03472	0	0	2.32493	2.12258	3.16221	1.46205e-33	4.09378	up	[H]	Coenzyme transport and metabolism	Molecular Function: O-methyltransferase activity (GO:0008171);; Biological Process: methylation (GO:0032259);; Molecular Function: protein dimerization activity (GO:0046983);;	K16040|7.3e-130|pmum:103328491|K16040 trans-resveratrol di-O-methyltransferase [EC:2.1.1.240] | (RefSeq) trans-resveratrol di-O-methyltransferase-like	Stilbenoid, diarylheptanoid and gingerol biosynthesis (ko00945)	[R]	General function prediction only	O-methyltransferase domain	Probable O-methyltransferase 3 OS=Humulus lupulus OX=3486 GN=OMT3 PE=2 SV=1	S	Function unknown	unnamed protein product [Prunus armeniaca]
PaF106G0700027208.01	1207	1176	1330	2298	3113	3601	11.3709	13.9107	13.1839	25.7768	39.3117	39.4691	9.53958e-24	1.31459	up	[MDT]	Cell wall/membrane/envelope biogenesis;; Cell cycle control, cell division, chromosome partitioning;; Signal transduction mechanisms	Molecular Function: ATP binding (GO:0005524);;	K08900|2.9e-222|pper:18771454|K08900 mitochondrial chaperone BCS1 | (RefSeq) AAA-ATPase At2g18193	--	[O]	Posttranslational modification, protein turnover, chaperones	ATPase family associated with various cellular activities (AAA)	AAA-ATPase At2g18193 OS=Arabidopsis thaliana OX=3702 GN=At2g18193 PE=2 SV=1	O	Posttranslational modification, protein turnover, chaperones	PREDICTED: uncharacterized protein LOC103340285 [Prunus mume]
PaF106G0800030952.01	1994	1735	2115	5635	3845	5115	28.9426	30.1521	31.6795	89.0477	65.1742	74.3659	3.74907e-30	1.37001	up	[G]	Carbohydrate transport and metabolism	Molecular Function: UDP-glycosyltransferase activity (GO:0008194);; Cellular Component: intracellular membrane-bounded organelle (GO:0043231);; Molecular Function: quercetin 3-O-glucosyltransferase activity (GO:0080043);; Molecular Function: quercetin 7-O-glucosyltransferase activity (GO:0080044);;	K23279|2.5e-243|mdm:114827585|K23279 gallate 1-beta-glucosyltransferase [EC:2.4.1.136] | (RefSeq) putative UDP-glucose glucosyltransferase	--	[GC]	Carbohydrate transport and metabolism;; Energy production and conversion	UDP-glucoronosyl and UDP-glucosyl transferase	Putative UDP-glucose glucosyltransferase OS=Fragaria ananassa OX=3747 GN=GT5 PE=2 SV=1	--	--	PREDICTED: putative UDP-glucose glucosyltransferase [Prunus mume]
PaF106G0100000099.01	677	472	543	106	112	122	7.94136	6.61539	6.55921	1.35209	1.5247	1.42385	6.55973e-39	-2.1067	down	[T]	Signal transduction mechanisms	Molecular Function: acid phosphatase activity (GO:0003993);; Molecular Function: metal ion binding (GO:0046872);;	K22390|0.0e+00|pmum:103324253|K22390 acid phosphatase type 7 | (RefSeq) purple acid phosphatase 15	--	[G]	Carbohydrate transport and metabolism	Calcineurin-like phosphoesterase	Purple acid phosphatase 15 OS=Arabidopsis thaliana OX=3702 GN=PAP15 PE=1 SV=1	G	Carbohydrate transport and metabolism	unnamed protein product [Prunus armeniaca]
PaF106G0100002489.01	221	145	179	66	87	49	4.49637	3.52495	3.75417	1.46123	2.05832	0.994176	3.792e-05	-1.12386	down	[R]	General function prediction only	Molecular Function: chitinase activity (GO:0004568);; Biological Process: carbohydrate metabolic process (GO:0005975);; Biological Process: chitin catabolic process (GO:0006032);; Molecular Function: chitin binding (GO:0008061);; Biological Process: cell wall macromolecule catabolic process (GO:0016998);;	K01183|1.0e-159|pper:18791427|K01183 chitinase [EC:3.2.1.14] | (RefSeq) endochitinase EP3	Amino sugar and nucleotide sugar metabolism (ko00520)	[R]	General function prediction only	Chitinase class I	Endochitinase EP3 OS=Arabidopsis thaliana OX=3702 GN=EP3 PE=1 SV=1	S	Function unknown	unnamed protein product [Prunus armeniaca]
PaF106G0100004257.01	1119	1072	1101	335	174	254	10.0212	11.4847	10.1654	3.26527	1.81094	2.27489	2.94999e-26	-1.90012	down	[O]	Posttranslational modification, protein turnover, chaperones	Molecular Function: serine-type endopeptidase activity (GO:0004252);;	K15333|3.4e-80|nsy:104224633|K15333 tRNA guanosine-2'-O-methyltransferase [EC:2.1.1.34] | (RefSeq) uncharacterized protein LOC104224633	--	--	--	Subtilase family	CO(2)-response secreted protease OS=Arabidopsis thaliana OX=3702 GN=CRSP PE=2 SV=1	O	Posttranslational modification, protein turnover, chaperones	unnamed protein product [Prunus armeniaca]
PaF106G0700028399.01	696	490	572	1000	998	1428	5.02123	4.22876	4.25772	7.85802	8.41027	10.3219	1.57906e-15	1.01561	up	[T]	Signal transduction mechanisms	Molecular Function: protein kinase activity (GO:0004672);; Molecular Function: ATP binding (GO:0005524);; Cellular Component: plasma membrane (GO:0005886);; Cellular Component: integral component of membrane (GO:0016021);;	K22911|2.1e-49|spen:107031166|K22911 thiamine phosphate phosphatase / amino-HMP aminohydrolase [EC:3.1.3.100 3.5.99.-] | (RefSeq) bifunctional TH2 protein, mitochondrial	Thiamine metabolism (ko00730)	--	--	Leucine rich repeat	Leucine-rich repeat receptor-like tyrosine-protein kinase PXC3 OS=Arabidopsis thaliana OX=3702 GN=PXC3 PE=2 SV=1	T	Signal transduction mechanisms	unnamed protein product [Prunus armeniaca]
PaF106G0300014027.01	327	252	271	1055	989	824	2.96019	2.73214	2.53444	10.4131	10.4768	7.48496	2.48136e-28	1.7713	up	[I]	Lipid transport and metabolism	Molecular Function: phospholipase D activity (GO:0004630);; Molecular Function: calcium ion binding (GO:0005509);; Cellular Component: membrane (GO:0016020);; Biological Process: lipid catabolic process (GO:0016042);; Biological Process: phosphatidylcholine metabolic process (GO:0046470);; Molecular Function: N-acylphosphatidylethanolamine-specific phospholipase D activity (GO:0070290);;	K01115|0.0e+00|pmum:103327720|K01115 phospholipase D1/2 [EC:3.1.4.4] | (RefSeq) phospholipase D alpha 4	Glycerophospholipid metabolism (ko00564);; Ether lipid metabolism (ko00565);; Endocytosis (ko04144)	[I]	Lipid transport and metabolism	Phospholipase D C terminal	Phospholipase D alpha 4 OS=Arabidopsis thaliana OX=3702 GN=PLDALPHA4 PE=2 SV=1	I	Lipid transport and metabolism	unnamed protein product [Prunus armeniaca]
PaF106G0100006300.01	318	277	249	679	586	780	1.80433	1.8789	1.45323	4.19212	3.88156	4.43233	4.66807e-21	1.3101	up	[R]	General function prediction only	Biological Process: signal transduction (GO:0007165);; Molecular Function: ADP binding (GO:0043531);;	K00695|5.0e-126|mtr:MTR_6g478030|K00695 sucrose synthase [EC:2.4.1.13] | (RefSeq) sucrose synthase	Starch and sucrose metabolism (ko00500)	--	--	TIR domain	Disease resistance protein RPV1 OS=Vitis rotundifolia OX=103349 GN=RPV1 PE=1 SV=1	T	Signal transduction mechanisms	disease resistance protein RPV1-like [Prunus dulcis]
PaF106G0200007106.01	0	0	0	180	243	218	0	0	0	5.13078	7.46258	5.74289	8.96122e-53	4.97056	up	[I]	Lipid transport and metabolism	Molecular Function: 3-hydroxyisobutyryl-CoA hydrolase activity (GO:0003860);;	K05605|8.4e-41|pmum:103328923|K05605 3-hydroxyisobutyryl-CoA hydrolase [EC:3.1.2.4] | (RefSeq) 3-hydroxyisobutyryl-CoA hydrolase-like protein 5	Valine, leucine and isoleucine degradation (ko00280);; beta-Alanine metabolism (ko00410);; Propanoate metabolism (ko00640);; Carbon metabolism (ko01200)	--	--	Enoyl-CoA hydratase/isomerase	3-hydroxyisobutyryl-CoA hydrolase-like protein 5 OS=Arabidopsis thaliana OX=3702 GN=At1g06550 PE=1 SV=2	I	Lipid transport and metabolism	unnamed protein product [Prunus armeniaca]
PaF106G0100006242.01	20	25	27	47	96	66	0.222419	0.334031	0.313814	0.590129	1.28944	0.760674	0.000567994	1.20197	up	[V]	Defense mechanisms	Molecular Function: antiporter activity (GO:0015297);; Cellular Component: integral component of membrane (GO:0016021);; Molecular Function: xenobiotic transporter activity (GO:0042910);;	K03327|1.3e-283|pmum:103319408|K03327 multidrug resistance protein, MATE family | (RefSeq) protein DETOXIFICATION 48	--	[R]	General function prediction only	MatE	Protein DETOXIFICATION 48 OS=Arabidopsis thaliana OX=3702 GN=DTX48 PE=2 SV=1	V	Defense mechanisms	unnamed protein product [Prunus armeniaca]
PaF106G0700027967.01	254	275	262	472	466	650	2.02454	2.62069	2.14817	4.09425	4.33151	5.1817	7.84584e-11	1.02753	up	[O]	Posttranslational modification, protein turnover, chaperones	Biological Process: response to reactive oxygen species (GO:0000302);; Cellular Component: cellular_component (GO:0005575);; Cellular Component: intracellular (GO:0005622);; Cellular Component: cell (GO:0005623);; Cellular Component: cytoplasm (GO:0005737);; Biological Process: regulation of translation (GO:0006417);; Biological Process: response to stress (GO:0006950);; Biological Process: respo…	K03695|7.7e-20|ini:109162853|K03695 ATP-dependent Clp protease ATP-binding subunit ClpB | (RefSeq) chaperone protein ClpB1-like	--	[O]	Posttranslational modification, protein turnover, chaperones	Clp amino terminal domain, pathogenicity island component	Protein SMAX1-LIKE 3 OS=Arabidopsis thaliana OX=3702 GN=SMXL3 PE=2 SV=1	O	Posttranslational modification, protein turnover, chaperones	unnamed protein product [Prunus armeniaca]
PaF106G0300014305.01	680	507	505	91	126	133	6.57953	5.97436	5.0968	0.956165	1.42309	1.28389	2.45994e-31	-2.04991	down	[I]	Lipid transport and metabolism	Molecular Function: lanosterol synthase activity (GO:0000250);; Cellular Component: lipid droplet (GO:0005811);; Biological Process: triterpenoid biosynthetic process (GO:0016104);; Molecular Function: beta-amyrin synthase activity (GO:0042300);;	K15813|2.1e-227|qsu:111984348|K15813 beta-amyrin synthase [EC:5.4.99.39] | (RefSeq) beta-amyrin synthase isoform X1	Sesquiterpenoid and triterpenoid biosynthesis (ko00909)	[I]	Lipid transport and metabolism	Squalene-hopene cyclase N-terminal domain	Beta-amyrin synthase OS=Betula platyphylla OX=78630 GN=OSCBPY PE=1 SV=1	I	Lipid transport and metabolism	unnamed protein product [Prunus armeniaca]
Prunus_sibirica_newGene_1774	27	23	21	67	67	100	0.623174	0.641876	0.488871	1.694	1.83869	2.35347	4.88087e-06	1.42838	up	[K]	Transcription	Molecular Function: nucleic acid binding (GO:0003676);; Biological Process: nucleobase-containing compound metabolic process (GO:0006139);; Biological Process: positive regulation of transcription elongation from RNA polymerase II promoter (GO:0032968);;	K11292|8.7e-115|pper:18766889|K11292 transcription elongation factor SPT6 | (RefSeq) transcription elongation factor SPT6-like	--	[A]	RNA processing and modification	Helix-hairpin-helix motif	Transcription elongation factor SPT6 homolog OS=Arabidopsis thaliana OX=3702 GN=SPT6 PE=1 SV=1	K	Transcription	transcription elongation factor SPT6-like [Prunus persica]
PaF106G0500019816.01	624	480	520	1472	1248	1611	5.34358	5.19633	4.90362	13.995	12.2789	14.7124	1.01555e-43	1.47186	up	[T]	Signal transduction mechanisms	Molecular Function: solute:proton antiporter activity (GO:0015299);; Cellular Component: integral component of membrane (GO:0016021);;	--	--	[P]	Inorganic ion transport and metabolism	Sodium/hydrogen exchanger family	Cation/H(+) antiporter 18 OS=Arabidopsis thaliana OX=3702 GN=CHX18 PE=2 SV=1	P	Inorganic ion transport and metabolism	unnamed protein product [Prunus armeniaca]
PaF106G0800031799.01	1834	1973	2134	993	702	813	27.0181	34.4169	32.1412	15.8002	12.07	11.8892	1.8951e-14	-1.11479	down	[Q]	Secondary metabolites biosynthesis, transport and catabolism	Molecular Function: metal ion binding (GO:0046872);; Molecular Function: dioxygenase activity (GO:0051213);;	K24028|2.1e-96|gmx:100776216|K24028 salicylic acid 3-hydroxylase [EC:1.14.11.-] | (RefSeq) protein DMR6-LIKE OXYGENASE 1	--	[QR]	Secondary metabolites biosynthesis, transport and catabolism;; General function prediction only	2OG-Fe(II) oxygenase superfamily	2-oxoglutarate-dependent dioxygenase 19 OS=Oryza sativa subsp. japonica OX=39947 GN=2ODD19 PE=1 SV=1	Q	Secondary metabolites biosynthesis, transport and catabolism	PREDICTED: protein DMR6-LIKE OXYGENASE 2-like [Prunus mume]
PaF106G0800030644.01	69	58	57	129	196	207	3.62344	3.61314	3.07055	7.38255	12.001	10.8992	1.03711e-08	1.42473	up	[O]	Posttranslational modification, protein turnover, chaperones	Cellular Component: cellular_component (GO:0005575);; Cellular Component: intracellular (GO:0005622);; Cellular Component: cell (GO:0005623);; Cellular Component: nucleus (GO:0005634);; Cellular Component: cytoplasm (GO:0005737);; Cellular Component: chloroplast (GO:0009507);; Cellular Component: plastid (GO:0009536);; Cellular Component: organelle (GO:0043226);; Cellular Component: membrane-boun…	K03686|4.3e-11|bvg:104900630|K03686 molecular chaperone DnaJ | (RefSeq) chaperone protein dnaJ A6, chloroplastic	--	[O]	Posttranslational modification, protein turnover, chaperones	DnaJ domain	Chaperone protein dnaJ 11, chloroplastic OS=Arabidopsis thaliana OX=3702 GN=ATJ11 PE=1 SV=2	O	Posttranslational modification, protein turnover, chaperones	unnamed protein product [Prunus armeniaca]
PaF106G0100002801.01	342	382	332	1176	935	1126	2.59055	3.46693	2.59341	10.0305	8.27283	8.55243	3.17614e-30	1.63039	up	[QV]	Secondary metabolites biosynthesis, transport and catabolism;; Defense mechanisms	Molecular Function: iron ion binding (GO:0005506);; Cellular Component: membrane (GO:0016020);; Molecular Function: oxidoreductase activity, acting on paired donors, with incorporation or reduction of molecular oxygen, NAD(P)H as one donor, and incorporation of one atom of oxygen (GO:0016709);; Molecular Function: heme binding (GO:0020037);;	K23810|1.3e-176|vvi:100855232|K23810 (E)-8-carboxylinalool synthase [EC:1.14.14.-] | (RefSeq) geraniol 8-hydroxylase	Monoterpenoid biosynthesis (ko00902)	[Q]	Secondary metabolites biosynthesis, transport and catabolism	Cytochrome P450	Geraniol 8-hydroxylase OS=Catharanthus roseus OX=4058 GN=CYP76B6 PE=1 SV=1	Q	Secondary metabolites biosynthesis, transport and catabolism	geraniol 8-hydroxylase [Prunus persica]
PaF106G0300011680.01	475	222	368	48	20	32	8.37433	4.67575	6.68923	0.914546	0.40511	0.56285	7.41373e-26	-2.79199	down	[IR]	Lipid transport and metabolism;; General function prediction only	Molecular Function: hydrolase activity, acting on ester bonds (GO:0016788);;	--	--	--	--	GDSL-like Lipase/Acylhydrolase	GDSL esterase/lipase 7 OS=Arabidopsis thaliana OX=3702 GN=GLIP7 PE=2 SV=1	I	Lipid transport and metabolism	unnamed protein product [Prunus armeniaca]
PaF106G0800030984.01	100	164	127	34	34	27	1.92261	3.77175	2.51523	0.704662	0.746978	0.505849	1.89063e-07	-1.58319	down	[E]	Amino acid transport and metabolism	Molecular Function: arylformamidase activity (GO:0004061);; Biological Process: tryptophan catabolic process to kynurenine (GO:0019441);;	--	--	--	--	Putative cyclase	Cyclase-like protein 2 OS=Arabidopsis thaliana OX=3702 GN=CYCLASE2 PE=2 SV=1	S	Function unknown	uncharacterized protein LOC110749515 [Prunus avium]
PaF106G0300013243.01	1135	959	1136	45	62	95	17.4588	17.6542	18.0313	0.749922	1.11335	1.45397	2.58468e-109	-3.70219	down	[K]	Transcription	Molecular Function: O-methyltransferase activity (GO:0008171);; Molecular Function: S-adenosylmethionine-dependent methyltransferase activity (GO:0008757);; Biological Process: aromatic compound biosynthetic process (GO:0019438);; Biological Process: methylation (GO:0032259);; Molecular Function: protein dimerization activity (GO:0046983);;	K16040|2.9e-128|qsu:112015373|K16040 trans-resveratrol di-O-methyltransferase [EC:2.1.1.240] | (RefSeq) trans-resveratrol di-O-methyltransferase-like	Stilbenoid, diarylheptanoid and gingerol biosynthesis (ko00945)	[R]	General function prediction only	O-methyltransferase domain	Trans-resveratrol di-O-methyltransferase OS=Vitis vinifera OX=29760 GN=ROMT PE=1 SV=2	S	Function unknown	unnamed protein product [Prunus armeniaca]
PaF106G0800032447.01	24	26	37	374	404	520	0.121571	0.153209	0.193755	2.06819	2.40435	2.71518	1.36928e-64	3.59632	up	[R]	General function prediction only	Biological Process: signal transduction (GO:0007165);; Molecular Function: ADP binding (GO:0043531);;	K00695|8.3e-129|mtr:MTR_6g478030|K00695 sucrose synthase [EC:2.4.1.13] | (RefSeq) sucrose synthase	Starch and sucrose metabolism (ko00500)	--	--	TIR domain	Disease resistance protein Roq1 OS=Nicotiana benthamiana OX=4100 GN=ROQ1 PE=1 SV=1	S	Function unknown	PREDICTED: TMV resistance protein N-like [Prunus mume]
PaF106G0400016677.01	143	83	117	834	889	1048	0.79657	0.551478	0.680674	5.11552	6.01341	5.97461	6.04573e-88	2.97282	up	[NW]	Cell motility;; Extracellular structures	Molecular Function: protein serine/threonine kinase activity (GO:0004674);; Molecular Function: ATP binding (GO:0005524);; Cellular Component: integral component of membrane (GO:0016021);; Molecular Function: carbohydrate binding (GO:0030246);;	K24104|5.3e-76|thj:104799061|K24104 GPN-loop GTPase | (RefSeq) LOW QUALITY PROTEIN: uncharacterized protein LOC104799061	--	--	--	Protein tyrosine and serine/threonine kinase	G-type lectin S-receptor-like serine/threonine-protein kinase At1g67520 OS=Arabidopsis thaliana OX=3702 GN=At1g67520 PE=2 SV=3	T	Signal transduction mechanisms	PREDICTED: G-type lectin S-receptor-like serine/threonine-protein kinase At1g67520 isoform X1 [Prunus mume]
PaF106G0800030409.01	206	208	190	524	466	619	1.06246	1.28827	1.01115	2.95379	2.81418	3.20658	1.965e-21	1.428	up	[R]	General function prediction only	Biological Process: signal transduction (GO:0007165);; Molecular Function: ADP binding (GO:0043531);;	K00695|8.5e-98|mtr:MTR_6g478030|K00695 sucrose synthase [EC:2.4.1.13] | (RefSeq) sucrose synthase	Starch and sucrose metabolism (ko00500)	--	--	TIR domain	TMV resistance protein N OS=Nicotiana glutinosa OX=35889 GN=N PE=1 SV=1	T	Signal transduction mechanisms	PREDICTED: probable disease resistance protein RPP1 isoform X2 [Prunus mume]
PaF106G0100005449.01	208	162	163	90	66	66	1.0031	0.935673	0.811694	0.473777	0.371398	0.317083	2.37016e-05	-1.03522	down	[V]	Defense mechanisms	Molecular Function: ATP binding (GO:0005524);; Cellular Component: integral component of membrane (GO:0016021);; Molecular Function: ATPase activity (GO:0016887);;	K08712|4.2e-140|gsl:Gasu_29800|K08712 ATP-binding cassette, subfamily G (WHITE), member 2, SNQ2 | (RefSeq) ABC transporter, ATP-binding protein	ABC transporters (ko02010)	[Q]	Secondary metabolites biosynthesis, transport and catabolism	ABC-2 type transporter	Pleiotropic drug resistance protein 1 OS=Petunia hybrida OX=4102 GN=PDR1 PE=2 SV=1	Q	Secondary metabolites biosynthesis, transport and catabolism	ABC transporter G family member 39-like isoform X2 [Prunus avium]
PaF106G0300013667.01	25	12	23	66	51	74	0.197631	0.1055	0.180911	0.567662	0.46981	0.581316	7.93422e-05	1.33163	up	[K]	Transcription	Molecular Function: ADP binding (GO:0043531);;	K13459|0.0e+00|pmum:103342075|K13459 disease resistance protein RPS2 | (RefSeq) probable disease resistance protein At5g63020	Plant-pathogen interaction (ko04626)	[T]	Signal transduction mechanisms	NB-ARC domain	Probable disease resistance protein At5g63020 OS=Arabidopsis thaliana OX=3702 GN=At5g63020 PE=2 SV=2	T	Signal transduction mechanisms	PREDICTED: probable disease resistance protein At5g63020 [Prunus mume]
PaF106G0200010038.01	11	22	17	99	38	76	0.092981	0.214719	0.145063	0.887545	0.36245	0.639869	4.73685e-05	1.47253	up	[T]	Signal transduction mechanisms	Biological Process: regulation of pH (GO:0006885);; Cellular Component: endomembrane system (GO:0012505);; Molecular Function: solute:proton antiporter activity (GO:0015299);; Biological Process: monovalent inorganic cation transport (GO:0015672);; Cellular Component: integral component of membrane (GO:0016021);;	--	--	[P]	Inorganic ion transport and metabolism	Sodium/hydrogen exchanger family	Cation/H(+) antiporter 15 OS=Arabidopsis thaliana OX=3702 GN=CHX15 PE=2 SV=1	P	Inorganic ion transport and metabolism	unnamed protein product [Prunus armeniaca]
PaF106G0800032639.01	236	212	256	67	47	93	1.68495	1.81323	1.88706	0.521587	0.386555	0.660829	2.48798e-11	-1.52528	down	[R]	General function prediction only	Biological Process: signal transduction (GO:0007165);; Molecular Function: ADP binding (GO:0043531);;	K00695|7.2e-106|mtr:MTR_6g478030|K00695 sucrose synthase [EC:2.4.1.13] | (RefSeq) sucrose synthase	Starch and sucrose metabolism (ko00500)	--	--	TIR domain	TMV resistance protein N OS=Nicotiana glutinosa OX=35889 GN=N PE=1 SV=1	S	Function unknown	PREDICTED: TMV resistance protein N-like [Prunus mume]
PaF106G0800030998.01	4070	3214	3759	11305	8694	8467	55.9123	52.8292	53.2646	169.029	139.416	116.455	1.66406e-29	1.42643	up	[O]	Posttranslational modification, protein turnover, chaperones	Molecular Function: cysteine-type peptidase activity (GO:0008234);;	K16292|5.9e-115|smo:SELMODRAFT_428615|K16292 KDEL-tailed cysteine endopeptidase [EC:3.4.22.-] | (RefSeq) hypothetical protein	--	[O]	Posttranslational modification, protein turnover, chaperones	Papain family cysteine protease	Probable cysteine protease RD21B OS=Arabidopsis thaliana OX=3702 GN=RD21B PE=1 SV=1	O	Posttranslational modification, protein turnover, chaperones	PREDICTED: cysteine proteinase RD21a-like [Prunus mume]
PaF106G0700026044.01	715	426	582	188	173	171	6.12853	4.49533	5.33625	1.78311	1.76459	1.51098	1.31891e-17	-1.49501	down	[G]	Carbohydrate transport and metabolism	Molecular Function: protein kinase activity (GO:0004672);; Molecular Function: ATP binding (GO:0005524);; Biological Process: carbohydrate metabolic process (GO:0005975);; Molecular Function: chitin binding (GO:0008061);; Cellular Component: integral component of membrane (GO:0016021);; Molecular Function: carbohydrate binding (GO:0030246);;	K01183|2.2e-92|nnu:104610684|K01183 chitinase [EC:3.2.1.14] | (RefSeq) chitotriosidase-1-like	Amino sugar and nucleotide sugar metabolism (ko00520)	[G]	Carbohydrate transport and metabolism	Glycosyl hydrolases family 18	Class V chitinase OS=Arabidopsis thaliana OX=3702 GN=ChiC PE=1 SV=1	T	Signal transduction mechanisms	unnamed protein product [Prunus armeniaca]
PaF106G0200010244.01	114	116	85	212	226	340	0.833248	1.01401	0.642587	1.70473	1.93603	2.54411	2.44002e-08	1.24345	up	[T]	Signal transduction mechanisms	Molecular Function: protein kinase activity (GO:0004672);; Molecular Function: ubiquitin-protein transferase activity (GO:0004842);; Molecular Function: ATP binding (GO:0005524);;	K17609|2.2e-109|eus:EUTSA_v10026931mg|K17609 nucleoredoxin [EC:1.8.1.8] | (RefSeq) hypothetical protein	--	--	--	Protein tyrosine and serine/threonine kinase	U-box domain-containing protein 35 OS=Arabidopsis thaliana OX=3702 GN=PUB35 PE=2 SV=2	T	Signal transduction mechanisms	unnamed protein product [Prunus armeniaca]
PaF106G0800031812.01	645	546	692	183	183	180	11.9046	11.9917	13.3053	3.66884	3.92439	3.36737	5.85551e-27	-1.61899	down	[Q]	Secondary metabolites biosynthesis, transport and catabolism	Molecular Function: oxidoreductase activity (GO:0016491);; Molecular Function: metal ion binding (GO:0046872);;	K24028|8.9e-92|lja:Lj0g3v0213339.1|K24028 salicylic acid 3-hydroxylase [EC:1.14.11.-] | (RefSeq) Lj0g3v0213339.1; -	--	[QR]	Secondary metabolites biosynthesis, transport and catabolism;; General function prediction only	non-haem dioxygenase in morphine synthesis N-terminal	2-oxoglutarate-dependent dioxygenase 19 OS=Oryza sativa subsp. japonica OX=39947 GN=2ODD19 PE=1 SV=1	Q	Secondary metabolites biosynthesis, transport and catabolism	PREDICTED: protein DMR6-LIKE OXYGENASE 2-like [Prunus mume]
PaF106G0400017495.01	2986	2488	2970	1039	1356	1439	22.5932	22.2298	23.2285	8.53016	12.0703	10.9243	4.01829e-19	-1.02439	down	[W]	Extracellular structures	Molecular Function: protein kinase activity (GO:0004672);; Molecular Function: ATP binding (GO:0005524);; Cellular Component: integral component of membrane (GO:0016021);;	K13416|9.0e-72|gmx:100305355|K13416 brassinosteroid insensitive 1-associated receptor kinase 1 [EC:2.7.10.1 2.7.11.1] | (RefSeq) somatic embryogenesis receptor-like kinase-like protein precursor	MAPK signaling pathway - plant (ko04016);; Plant hormone signal transduction (ko04075);; Plant-pathogen interaction (ko04626)	--	--	Protein tyrosine and serine/threonine kinase	Probable LRR receptor-like serine/threonine-protein kinase RFK1 OS=Arabidopsis thaliana OX=3702 GN=RKF1 PE=1 SV=1	T	Signal transduction mechanisms	probable LRR receptor-like serine/threonine-protein kinase RFK1 isoform X1 [Prunus persica]
PaF106G0800030789.01	55	30	49	88	99	106	1.05715	0.698172	0.974138	1.86042	2.23273	2.0684	0.000331633	1.0366	up	[T]	Signal transduction mechanisms	Molecular Function: protein kinase activity (GO:0004672);; Molecular Function: ATP binding (GO:0005524);;	K23544|8.1e-31|brp:103842861|K23544 serine incorporator 1/3 | (RefSeq) serine incorporator 3	--	[T]	Signal transduction mechanisms	Protein tyrosine and serine/threonine kinase	Serine/threonine-protein kinase ZRK1 OS=Arabidopsis thaliana OX=3702 GN=ZRK1 PE=1 SV=1	T	Signal transduction mechanisms	unnamed protein product [Prunus armeniaca]
[truncated: 45 more rows]
