# Supplementary material for: Mining for genes related to pistil abortion in Prunus sibirica L
Source: PeerJ. 2022 Nov 15;10:e14366. doi: 10.7717/peerj.14366 (PMC9673769; doi:10.7717/peerj.14366)
Supplement: Table S11 [file peerj-10-14366-s011.xls]

## Sheet: _Biological_Process
Table S11 GSEA analysis based on GO functional classification in P. sibirica
ID	Description	setSize	enrichmentScore	NES	pvalue	qvalue	rank	core_enrichment
GO:0007165	signal transduction	275	0.5557	2.16002	0.00199203	0.172798	1228	PaF106G0700028369.01;Prunus_sibirica_newGene_1339;PaF106G0200007544.01;PaF106G0800032652.01;PaF106G0800032588.01;PaF106G0800030462.01;PaF106G0700028364.01;PaF106G0400014852.01;PaF106G0800031206.01;Prunus_sibirica_newGene_1338;PaF106G0700028373.01;PaF106G0800032487.01;PaF106G0700028365.01;PaF106G0800032547.01;PaF106G0800030461.01;PaF106G0800032447.01;PaF106G0200008433.01;PaF106G0800032875.01;PaF10…
GO:0010073	meristem maintenance	20	-0.786865	-2.01285	0.00199601	0.172798	493	PaF106G0100000013.01;PaF106G0800032134.01;PaF106G0800032137.01;PaF106G0400015280.01;PaF106G0400015292.01;PaF106G0400015287.01
GO:0009620	response to fungus	36	-0.669312	-1.92034	0.00204918	0.172798	1804	PaF106G0600024957.01;PaF106G0400015550.01;PaF106G0300013611.01;PaF106G0400015280.01;PaF106G0400015292.01;PaF106G0400015287.01
GO:0010088	phloem development	10	-0.842375	-1.81337	0.00205761	0.172798	1481	PaF106G0600024737.01;PaF106G0100002932.01;PaF106G0100000372.01;PaF106G0100000370.01;PaF106G0100000369.01
GO:0006260	DNA replication	45	-0.601374	-1.80465	0.00206186	0.172798	3463	PaF106G0200010622.01;PaF106G0400015297.01;PaF106G0300012801.01;PaF106G0300012555.01;PaF106G0400017118.01;PaF106G0200009964.01;PaF106G0800029954.01;PaF106G0600025144.01;PaF106G0800029863.01;PaF106G0400014898.01;PaF106G0800029665.01;PaF106G0200010116.01;PaF106G0800030287.01;PaF106G0400016352.01;PaF106G0600022358.01;PaF106G0100003275.01;Prunus_sibirica_newGene_1393;PaF106G0100005353.01;PaF106G010000…
GO:0048507	meristem development	25	-0.751342	-1.9684	0.00207469	0.172798	493	PaF106G0100000013.01;PaF106G0800032134.01;PaF106G0800032137.01;PaF106G0400015280.01;PaF106G0400015292.01;PaF106G0400015287.01
GO:0009451	RNA modification	309	-0.413203	-1.63816	0.00210084	0.172798	6098	PaF106G0800030209.01;PaF106G0100004241.01;PaF106G0600025273.01;PaF106G0400017107.01;PaF106G0200006871.01;PaF106G0200008372.01;PaF106G0200007024.01;PaF106G0100005404.01;PaF106G0100000587.01;PaF106G0600024446.01;PaF106G0700028686.01;PaF106G0300014508.01;PaF106G0800030368.01;PaF106G0300011937.01;PaF106G0100006732.01;PaF106G0600022391.01;PaF106G0200008038.01;PaF106G0300011161.01;PaF106G0400015021.01;…
GO:0009888	tissue development	54	-0.641309	-2.00776	0.0021097	0.172798	493	PaF106G0300013611.01;PaF106G0100000013.01;PaF106G0800032134.01;PaF106G0800032137.01;PaF106G0400015280.01;PaF106G0400015292.01;PaF106G0400015287.01
GO:0050832	defense response to fungus	53	-0.580599	-1.80882	0.00215054	0.172798	1529	PaF106G0600024957.01;PaF106G0400015550.01;PaF106G0100000264.01;PaF106G0600025632.01;PaF106G0300013611.01;PaF106G0400015280.01;PaF106G0400015292.01;PaF106G0400015287.01
GO:0009733	response to auxin	62	0.559851	1.75563	0.00386847	0.252147	2324	PaF106G0800030462.01;PaF106G0700027134.01;PaF106G0800031596.01;PaF106G0800031608.01;PaF106G0600022655.01;PaF106G0800031599.01;PaF106G0800029443.01;PaF106G0100005931.01;PaF106G0400016604.01;PaF106G0100004336.01;PaF106G0200010737.01;PaF106G0600022656.01;PaF106G0100001867.01;PaF106G0100000914.01;PaF106G0700026808.01;PaF106G0600024309.01;PaF106G0300013927.01;PaF106G0700027703.01
GO:0090305	nucleic acid phosphodiester bond hydrolysis	240	-0.388159	-1.50707	0.00398406	0.252147	5920	PaF106G0100003733.01;PaF106G0100005404.01;PaF106G0600024446.01;PaF106G0700028686.01;PaF106G0300014508.01;PaF106G0100000165.01;PaF106G0100006732.01;PaF106G0600022391.01;PaF106G0200008038.01;PaF106G0300011161.01;PaF106G0400015021.01;PaF106G0400017996.01;PaF106G0200007558.01;PaF106G0800032683.01;PaF106G0200010668.01;PaF106G0800030541.01;PaF106G0300014347.01;Prunus_sibirica_newGene_2008;PaF106G050002…
GO:1901360	organic cyclic compound metabolic process	311	-0.352754	-1.39983	0.0041841	0.252147	5602	PaF106G0600022391.01;PaF106G0200008038.01;PaF106G0300011161.01;PaF106G0400015021.01;PaF106G0400017996.01;PaF106G0200007558.01;PaF106G0800032683.01;PaF106G0200010668.01;PaF106G0800030541.01;PaF106G0100000819.01;PaF106G0300014347.01;Prunus_sibirica_newGene_2008;PaF106G0400015609.01;PaF106G0500021221.01;PaF106G0100005364.01;PaF106G0100000752.01;PaF106G0500020147.01;PaF106G0700026262.01;PaF106G030001…
GO:0048544	recognition of pollen	65	0.51248	1.62865	0.00571429	0.284857	1965	PaF106G0300011925.01;Prunus_sibirica_newGene_267;PaF106G0400017975.01;PaF106G0600021559.01;PaF106G0600021563.01;PaF106G0300011917.01;PaF106G0600021566.01;PaF106G0400017987.01;PaF106G0400017978.01;PaF106G0100000904.01;PaF106G0400016551.01;PaF106G0300011913.01;PaF106G0300011905.01;PaF106G0600024658.01;PaF106G0400016557.01;PaF106G0400015888.01;PaF106G0400015894.01;PaF106G0800029687.01;PaF106G0800029…
GO:0046148	pigment biosynthetic process	12	-0.780654	-1.76325	0.00609756	0.284857	1675	PaF106G0400017882.01;PaF106G0400017886.01;PaF106G0400017887.01;PaF106G0400017881.01;PaF106G0400017885.01;PaF106G0800031339.01
GO:0006270	DNA replication initiation	10	-0.803196	-1.72903	0.00617284	0.284857	3175	PaF106G0600024402.01;PaF106G0800030173.01;PaF106G0600022073.01;PaF106G0700026115.01;PaF106G0800030622.01;PaF106G0100003796.01;PaF106G0800029282.01;PaF106G0800031844.01
GO:0006725	cellular aromatic compound metabolic process	309	-0.347834	-1.379	0.00630252	0.284857	5602	PaF106G0600022391.01;PaF106G0200008038.01;PaF106G0300011161.01;PaF106G0400015021.01;PaF106G0400017996.01;PaF106G0200007558.01;PaF106G0800032683.01;PaF106G0200010668.01;PaF106G0800030541.01;PaF106G0100000819.01;PaF106G0300014347.01;Prunus_sibirica_newGene_2008;PaF106G0400015609.01;PaF106G0500021221.01;PaF106G0100005364.01;PaF106G0100000752.01;PaF106G0500020147.01;PaF106G0700026262.01;PaF106G030001…
GO:0071395	cellular response to jasmonic acid stimulus	15	0.734292	1.69915	0.00801603	0.302577	539	PaF106G0100001269.01;PaF106G0400016036.01;PaF106G0100001268.01
GO:0032502	developmental process	219	-0.362876	-1.38939	0.00821355	0.302577	931	PaF106G0500020831.01;PaF106G0100003313.01;PaF106G0600024526.01;PaF106G0600024230.01;PaF106G0600024737.01;PaF106G0400015550.01;PaF106G0100004719.01;PaF106G0100002765.01;PaF106G0700027756.01;PaF106G0700026733.01;PaF106G0200010599.01;PaF106G0300014130.01;PaF106G0400017245.01;PaF106G0600024147.01;PaF106G0100001994.01;PaF106G0300013611.01;PaF106G0100004908.01;PaF106G0100000013.01;PaF106G0300012225.01;…
GO:0034641	cellular nitrogen compound metabolic process	313	-0.344411	-1.36839	0.00833333	0.302577	5602	PaF106G0600022391.01;PaF106G0200008038.01;PaF106G0300011161.01;PaF106G0400015021.01;PaF106G0400017996.01;PaF106G0200007558.01;PaF106G0800032683.01;PaF106G0200010668.01;PaF106G0800030541.01;PaF106G0100000819.01;PaF106G0300014347.01;Prunus_sibirica_newGene_2008;PaF106G0400015609.01;PaF106G0500021221.01;PaF106G0100005364.01;PaF106G0100000752.01;PaF106G0500020147.01;PaF106G0700026262.01;PaF106G030001…
GO:0098542	defense response to other organism	51	-0.525833	-1.62108	0.00858369	0.302577	606	PaF106G0400015550.01;PaF106G0300013855.01;PaF106G0200009483.01;PaF106G0300013611.01;PaF106G0300012225.01;PaF106G0400015280.01;PaF106G0400015292.01;PaF106G0400015287.01
GO:0023014	signal transduction by protein phosphorylation	16	0.709776	1.66558	0.00994036	0.302577	2647	PaF106G0100000980.01;PaF106G0600022022.01;PaF106G0300013252.01;PaF106G0300012572.01;PaF106G0300012772.01;PaF106G0100005832.01
GO:0031098	stress-activated protein kinase signaling cascade	16	0.709776	1.66558	0.00994036	0.302577	2647	PaF106G0100000980.01;PaF106G0600022022.01;PaF106G0300013252.01;PaF106G0300012572.01;PaF106G0300012772.01;PaF106G0100005832.01
GO:0007059	chromosome segregation	12	-0.767103	-1.73265	0.0101626	0.302577	2383	PaF106G0500018598.01;PaF106G0200008577.01;PaF106G0200008738.01;PaF106G0100002999.01
GO:0090304	nucleic acid metabolic process	289	-0.350172	-1.38194	0.0103306	0.302577	5602	PaF106G0600022391.01;PaF106G0200008038.01;PaF106G0300011161.01;PaF106G0400015021.01;PaF106G0400017996.01;PaF106G0200007558.01;PaF106G0800032683.01;PaF106G0200010668.01;PaF106G0800030541.01;PaF106G0100000819.01;PaF106G0300014347.01;Prunus_sibirica_newGene_2008;PaF106G0400015609.01;PaF106G0500021221.01;PaF106G0100005364.01;PaF106G0100000752.01;PaF106G0700026262.01;PaF106G0300012405.01;PaF106G080003…
GO:0046483	heterocycle metabolic process	307	-0.345948	-1.37023	0.0104603	0.302577	5602	PaF106G0600022391.01;PaF106G0200008038.01;PaF106G0300011161.01;PaF106G0400015021.01;PaF106G0400017996.01;PaF106G0200007558.01;PaF106G0800032683.01;PaF106G0200010668.01;PaF106G0800030541.01;PaF106G0100000819.01;PaF106G0300014347.01;Prunus_sibirica_newGene_2008;PaF106G0400015609.01;PaF106G0500021221.01;PaF106G0100005364.01;PaF106G0100000752.01;PaF106G0500020147.01;PaF106G0700026262.01;PaF106G030001…
GO:0000724	double-strand break repair via homologous recombination	31	-0.602289	-1.6681	0.0124481	0.332334	2587	PaF106G0100002559.01;PaF106G0400016161.01;PaF106G0400015609.01;PaF106G0200007046.01;PaF106G0100002106.01;PaF106G0700027028.01;PaF106G0800032907.01;PaF106G0500018685.01;PaF106G0400018098.01;PaF106G0600025859.01;PaF106G0400015931.01;PaF106G0700026776.01;PaF106G0400014629.01;PaF106G0200010273.01;PaF106G0100005353.01;PaF106G0600021810.01;PaF106G0800029946.01;PaF106G0800031844.01;PaF106G0600022446.01;…
GO:0006955	immune response	23	-0.6478	-1.68305	0.012474	0.332334	10	PaF106G0100004529.01;PaF106G0700026675.01;PaF106G0100005769.01;PaF106G0400015280.01;PaF106G0400015292.01;PaF106G0400015287.01
GO:0071229	cellular response to acid chemical	28	0.636976	1.70171	0.0133843	0.332334	2785	PaF106G0800030462.01;PaF106G0100001269.01;PaF106G0400016036.01;PaF106G0100001268.01;PaF106G0100001867.01;PaF106G0100000914.01;PaF106G0300012566.01;PaF106G0100001274.01;PaF106G0200008488.01
GO:0002376	immune system process	24	-0.641227	-1.67918	0.0142566	0.332334	10	PaF106G0100004529.01;PaF106G0700026675.01;PaF106G0100005769.01;PaF106G0400015280.01;PaF106G0400015292.01;PaF106G0400015287.01
GO:0019432	triglyceride biosynthetic process	11	-0.751307	-1.6469	0.014433	0.332334	1280	PaF106G0300013020.01;PaF106G0700027731.01;PaF106G0400015123.01;PaF106G0300013009.01;PaF106G0300013014.01
GO:0032501	multicellular organismal process	174	-0.368041	-1.37075	0.014553	0.332334	864	PaF106G0600024230.01;PaF106G0600024737.01;PaF106G0400015550.01;PaF106G0100004719.01;PaF106G0200010599.01;PaF106G0400017245.01;PaF106G0100001994.01;PaF106G0300013611.01;PaF106G0100000013.01;PaF106G0300012225.01;Prunus_sibirica_newGene_1788;PaF106G0800032134.01;PaF106G0800032137.01;PaF106G0400015280.01;PaF106G0400015292.01;PaF106G0400015287.01
GO:0006633	fatty acid biosynthetic process	57	-0.491521	-1.55965	0.0147059	0.332334	5505	PaF106G0600023711.01;PaF106G0100006448.01;PaF106G0400017399.01;PaF106G0600024729.01;PaF106G0600021542.01;PaF106G0300013850.01;PaF106G0800031438.01;PaF106G0100004718.01;PaF106G0700026338.01;PaF106G0100000756.01;PaF106G0100003695.01;PaF106G0600021934.01;PaF106G0400015745.01;PaF106G0300011564.01;PaF106G0600022397.01;PaF106G0100001656.01;PaF106G0100002834.01;PaF106G0700028190.01;PaF106G0100005899.01;…
GO:0045087	innate immune response	22	-0.660781	-1.70069	0.0162602	0.352287	10	PaF106G0100004529.01;PaF106G0700026675.01;PaF106G0400015280.01;PaF106G0400015292.01;PaF106G0400015287.01
GO:0006139	nucleobase-containing compound metabolic process	300	-0.341288	-1.34963	0.0165631	0.352287	5602	PaF106G0600022391.01;PaF106G0200008038.01;PaF106G0300011161.01;PaF106G0400015021.01;PaF106G0400017996.01;PaF106G0200007558.01;PaF106G0800032683.01;PaF106G0200010668.01;PaF106G0800030541.01;PaF106G0100000819.01;PaF106G0300014347.01;Prunus_sibirica_newGene_2008;PaF106G0400015609.01;PaF106G0500021221.01;PaF106G0100005364.01;PaF106G0100000752.01;PaF106G0500020147.01;PaF106G0700026262.01;PaF106G030001…
GO:0043412	macromolecule modification	330	-0.326012	-1.29607	0.0212314	0.429893	5602	PaF106G0600022391.01;PaF106G0200008038.01;PaF106G0300011161.01;PaF106G0400015021.01;PaF106G0800029764.01;PaF106G0400017996.01;PaF106G0200007558.01;PaF106G0800032683.01;PaF106G0200010668.01;PaF106G0800030541.01;PaF106G0300014347.01;Prunus_sibirica_newGene_2008;PaF106G0400015609.01;PaF106G0500021221.01;PaF106G0100005714.01;PaF106G0100005364.01;PaF106G0100000752.01;PaF106G0600022316.01;PaF106G010000…
GO:0009867	jasmonic acid mediated signaling pathway	18	0.666938	1.61769	0.0214008	0.429893	539	PaF106G0100001269.01;PaF106G0400016036.01;PaF106G0100001268.01
GO:0044237	cellular metabolic process	493	-0.304623	-1.25742	0.0227273	0.4442	5602	PaF106G0300014275.01;PaF106G0600022391.01;PaF106G0200008038.01;PaF106G0300011161.01;PaF106G0400015021.01;PaF106G0800029764.01;PaF106G0400017996.01;PaF106G0200007558.01;PaF106G0800032683.01;PaF106G0200010668.01;PaF106G0800030541.01;PaF106G0100000819.01;PaF106G0300014347.01;Prunus_sibirica_newGene_2008;PaF106G0400015609.01;PaF106G0500021221.01;PaF106G0100005714.01;PaF106G0100005364.01;PaF106G010000…
GO:1901701	cellular response to oxygen-containing compound	35	0.564703	1.57804	0.0273438	0.520364	2785	PaF106G0800030462.01;PaF106G0100001269.01;PaF106G0400016036.01;PaF106G0100001268.01;PaF106G0100005931.01;PaF106G0100001867.01;PaF106G0100000914.01;PaF106G0300012566.01;PaF106G0100001274.01;PaF106G0200008488.01
GO:0048856	anatomical structure development	191	-0.353075	-1.33537	0.0287474	0.531734	1526	PaF106G0600024230.01;PaF106G0600024737.01;PaF106G0400015550.01;PaF106G0100004719.01;PaF106G0100002765.01;PaF106G0200010599.01;PaF106G0400017245.01;PaF106G0100001994.01;PaF106G0300013611.01;PaF106G0100000013.01;PaF106G0300012225.01;Prunus_sibirica_newGene_1788;PaF106G0800032134.01;PaF106G0800032137.01;PaF106G0400015280.01;PaF106G0400015292.01;PaF106G0400015287.01
GO:0009932	cell tip growth	12	0.730058	1.60928	0.0294118	0.531734	4625	PaF106G0600024841.01;PaF106G0800031242.01;PaF106G0500019800.01;PaF106G0300010916.01;PaF106G0600023731.01;PaF106G0300011240.01;PaF106G0400018179.01;PaF106G0200008575.01;PaF106G0800029477.01;PaF106G0100000510.01
GO:0016104	triterpenoid biosynthetic process	10	-0.742822	-1.59906	0.0308642	0.544383	4441	PaF106G0300014298.01;PaF106G0300014304.01;PaF106G0300014303.01;PaF106G0100000027.01;PaF106G0300014296.01;PaF106G0300014306.01;PaF106G0300014305.01
GO:0009751	response to salicylic acid	15	0.68093	1.57567	0.0320641	0.552082	2095	PaF106G0800030462.01;PaF106G0400016036.01;PaF106G0300013492.01;PaF106G0400017937.01;PaF106G0100001867.01
GO:0046274	lignin catabolic process	15	-0.657161	-1.56751	0.0357853	0.595736	624	PaF106G0200010042.01;PaF106G0800032256.01;PaF106G0600022226.01;PaF106G0800032257.01
GO:0048367	shoot system development	55	-0.455845	-1.43604	0.0378151	0.595736	1477	PaF106G0400015550.01;PaF106G0300012100.01;PaF106G0100001994.01;PaF106G0300013611.01;PaF106G0100000013.01;PaF106G0300012225.01;Prunus_sibirica_newGene_1788
GO:0043207	response to external biotic stimulus	68	-0.442529	-1.43679	0.0378947	0.595736	675	PaF106G0200009483.01;PaF106G0300013611.01;PaF106G0300012225.01;PaF106G0400015280.01;PaF106G0400015292.01;PaF106G0400015287.01
GO:0051707	response to other organism	68	-0.442758	-1.43753	0.0378947	0.595736	675	PaF106G0200009483.01;PaF106G0300013611.01;PaF106G0300012225.01;PaF106G0400015280.01;PaF106G0400015292.01;PaF106G0400015287.01
GO:0016070	RNA metabolic process	270	-0.327415	-1.28527	0.0431211	0.663477	5602	PaF106G0600022391.01;PaF106G0200008038.01;PaF106G0300011161.01;PaF106G0400015021.01;PaF106G0400017996.01;PaF106G0200007558.01;PaF106G0800032683.01;PaF106G0200010668.01;PaF106G0800030541.01;PaF106G0100000819.01;PaF106G0300014347.01;Prunus_sibirica_newGene_2008;PaF106G0500021221.01;PaF106G0100005364.01;PaF106G0100000752.01;PaF106G0700026262.01;PaF106G0300012405.01;PaF106G0800032066.01;PaF106G010000…
GO:0016925	protein sumoylation	11	-0.681175	-1.49317	0.0494845	0.740765	2772	PaF106G0600024297.01;PaF106G0800030156.01;PaF106G0400015608.01;PaF106G0100000133.01;PaF106G0100000111.01
GO:0006468	protein phosphorylation	118	0.374281	1.29983	0.0501931	0.740765	1649	PaF106G0400018013.01;PaF106G0400018019.01;PaF106G0300011925.01;PaF106G0800030782.01;PaF106G0300011917.01;PaF106G0300011919.01;PaF106G0400017172.01;Prunus_sibirica_newGene_1679;PaF106G0400017978.01;PaF106G0400016551.01;PaF106G0600024874.01;PaF106G0300011264.01;PaF106G0800030797.01;PaF106G0400018028.01;PaF106G0400018030.01;PaF106G0600022436.01;PaF106G0400016557.01;PaF106G0400015888.01
GO:0009908	flower development	38	-0.503975	-1.45556	0.0527383	0.755125	1035	PaF106G0100006155.01;PaF106G0200010461.01;PaF106G0100000013.01;Prunus_sibirica_newGene_1788;PaF106G0400016074.01
GO:0045490	pectin catabolic process	46	0.481478	1.42952	0.0532544	0.755125	654	PaF106G0700026834.01;PaF106G0600025342.01;PaF106G0100005494.01;PaF106G0100005503.01;PaF106G0100006531.01;PaF106G0700026837.01;PaF106G0300014581.01
GO:0006099	tricarboxylic acid cycle	31	0.533679	1.45463	0.0557692	0.775576	5114	PaF106G0400016106.01;PaF106G0200009736.01;PaF106G0400015674.01;PaF106G0700027007.01;PaF106G0400016787.01;PaF106G0100003601.01;PaF106G0300012562.01;PaF106G0300011206.01;PaF106G0800030705.01;PaF106G0400017669.01;PaF106G0400016272.01;PaF106G0700027273.01;PaF106G0300012017.01
GO:0007346	regulation of mitotic cell cycle	26	0.559178	1.4769	0.0573614	0.779937	2647	PaF106G0100000980.01;PaF106G0600022022.01;PaF106G0300013252.01;PaF106G0300012572.01;PaF106G0300012772.01;PaF106G0100005832.01
GO:0032147	activation of protein kinase activity	19	0.611226	1.50636	0.0587084	0.779937	2647	PaF106G0100000980.01;PaF106G0600022022.01;PaF106G0300013252.01;PaF106G0200010377.01;PaF106G0300012572.01;PaF106G0300012772.01;PaF106G0100005832.01
GO:0006574	valine catabolic process	10	0.700748	1.49856	0.0600775	0.779937	1372	PaF106G0800032469.01;PaF106G0600023307.01;PaF106G0200009439.01;PaF106G0200009442.01;PaF106G0400016830.01
GO:0042493	response to drug	30	0.535309	1.45143	0.0606061	0.779937	3644	PaF106G0800030462.01;PaF106G0400016036.01;PaF106G0700027967.01;PaF106G0400017937.01;PaF106G0100001867.01;PaF106G0400015808.01;PaF106G0300013648.01;PaF106G0100001870.01;PaF106G0600024959.01
GO:0051704	multi-organism process	106	-0.377939	-1.31814	0.0614754	0.779937	1526	PaF106G0600024957.01;PaF106G0400015550.01;PaF106G0100002765.01;PaF106G0400017245.01;PaF106G0200009482.01;PaF106G0200009483.01;PaF106G0300013611.01;PaF106G0300012225.01;PaF106G0400015280.01;PaF106G0400015292.01;PaF106G0400015287.01
GO:0046677	response to antibiotic	26	0.555413	1.46696	0.0630975	0.786715	2095	PaF106G0800030462.01;PaF106G0400016036.01;PaF106G0700027967.01;PaF106G0400017937.01;PaF106G0100001867.01
GO:0080167	response to karrikin	14	-0.619237	-1.4494	0.0652174	0.796978	4167	PaF106G0500020027.01;PaF106G0200010345.01;PaF106G0100003185.01;PaF106G0400015745.01;PaF106G0400017280.01;PaF106G0500018684.01;PaF106G0600024230.01;PaF106G0800032376.01
GO:0032508	DNA duplex unwinding	14	-0.617053	-1.44429	0.0671937	0.796978	4787	PaF106G0700027028.01;PaF106G0500018685.01;PaF106G0300012555.01;PaF106G0700026776.01;PaF106G0100001351.01;PaF106G0600021810.01;PaF106G0300013794.01;PaF106G0700027029.01
GO:0044249	cellular biosynthetic process	64	-0.41829	-1.34789	0.0672269	0.796978	4967	PaF106G0300014484.01;PaF106G0600025163.01;PaF106G0100002106.01;PaF106G0100002657.01;PaF106G0200009220.01;PaF106G0400015883.01;PaF106G0600023689.01;PaF106G0300014353.01;PaF106G0500019033.01;PaF106G0300012622.01;PaF106G0200010051.01;PaF106G0400015716.01;PaF106G0800030702.01;PaF106G0400015745.01;PaF106G0800029863.01;PaF106G0800029665.01;PaF106G0200010116.01;PaF106G0600025385.01;PaF106G0800030287.01;…
GO:0048588	developmental cell growth	10	0.694611	1.48544	0.0697674	0.801905	4625	PaF106G0600024841.01;PaF106G0800031242.01;PaF106G0300011240.01;PaF106G0400018179.01;PaF106G0200008575.01;PaF106G0800029477.01;PaF106G0100000510.01
GO:0009845	seed germination	20	0.587026	1.46107	0.0698603	0.801905	1509	PaF106G0600022481.01;PaF106G0100000204.01;PaF106G0800029684.01;PaF106G0100002674.01;PaF106G0200008241.01
GO:0045910	negative regulation of DNA recombination	13	-0.631734	-1.45808	0.0712831	0.803744	4602	PaF106G0400017815.01;PaF106G0700027141.01;PaF106G0800029288.01;PaF106G0100003863.01;PaF106G0500021213.01;PaF106G0300013794.01;PaF106G0300012697.01
GO:0010035	response to inorganic substance	64	0.416893	1.31787	0.0722433	0.803744	2437	PaF106G0800030462.01;PaF106G0400016036.01;PaF106G0100003928.01;PaF106G0300011189.01;PaF106G0700027967.01;PaF106G0100000204.01;PaF106G0800029684.01;PaF106G0500019963.01;PaF106G0100001867.01;PaF106G0500020161.01
GO:0071704	organic substance metabolic process	498	-0.284414	-1.17269	0.0735294	0.805657	5093	PaF106G0100002985.01;PaF106G0100002589.01;PaF106G0800031657.01;PaF106G0500020147.01;PaF106G0700026262.01;PaF106G0300012405.01;PaF106G0100001661.01;PaF106G0800032066.01;PaF106G0100006415.01;PaF106G0600023304.01;PaF106G0300014484.01;PaF106G0800029757.01;PaF106G0600025163.01;PaF106G0100002106.01;PaF106G0100006078.01;PaF106G0700027028.01;PaF106G0300012078.01;PaF106G0100000890.01;PaF106G0500020657.01;…
GO:0019748	secondary metabolic process	20	-0.570194	-1.45859	0.0758483	0.814665	4381	PaF106G0800030810.01;Prunus_sibirica_newGene_1840;PaF106G0100003185.01;PaF106G0800030815.01;PaF106G0800030807.01;PaF106G0100001995.01;PaF106G0800030813.01;PaF106G0800030809.01;PaF106G0300012225.01
GO:0006807	nitrogen compound metabolic process	470	-0.283778	-1.16648	0.0766046	0.814665	5602	PaF106G0600022391.01;PaF106G0200008038.01;PaF106G0300011161.01;PaF106G0400015021.01;PaF106G0800029764.01;PaF106G0400017996.01;PaF106G0200007558.01;PaF106G0800032683.01;PaF106G0200010668.01;PaF106G0800030541.01;PaF106G0100000819.01;PaF106G0300014347.01;Prunus_sibirica_newGene_2008;PaF106G0400015609.01;PaF106G0500021221.01;PaF106G0100005714.01;PaF106G0100005364.01;PaF106G0100000752.01;PaF106G060002…
GO:0006334	nucleosome assembly	27	-0.526096	-1.40532	0.0785124	0.822853	3831	PaF106G0100003863.01;PaF106G0300014066.01;PaF106G0300011416.01;PaF106G0100003911.01;PaF106G0600022341.01;PaF106G0600025859.01;PaF106G0200009755.01;PaF106G0600022357.01;PaF106G0500021213.01;PaF106G0300012697.01;PaF106G0200009662.01;PaF106G0600024535.01
GO:0044281	small molecule metabolic process	41	-0.459678	-1.34567	0.0852391	0.866663	1024	PaF106G0300014484.01;PaF106G0600025163.01;PaF106G0100002106.01;PaF106G0200009220.01;PaF106G0300014353.01;PaF106G0500019033.01;PaF106G0400015716.01;Prunus_sibirica_newGene_1840;PaF106G0800030702.01;PaF106G0400015745.01;PaF106G0600023422.01;PaF106G0500018541.01;PaF106G0200009482.01;PaF106G0500018649.01;PaF106G0600023506.01;PaF106G0300012225.01;PaF106G0600024640.01
GO:0031408	oxylipin biosynthetic process	14	-0.60058	-1.40573	0.0869565	0.866663	2450	PaF106G0600025402.01;PaF106G0600025399.01;PaF106G0100002824.01;PaF106G0600025400.01;PaF106G0600025398.01;PaF106G0200006848.01;PaF106G0200006845.01;PaF106G0200006844.01
GO:1901576	organic substance biosynthetic process	71	-0.399372	-1.30279	0.0877944	0.866663	4967	PaF106G0300014484.01;PaF106G0600025163.01;PaF106G0100002106.01;PaF106G0100002657.01;PaF106G0200009220.01;PaF106G0400015883.01;Prunus_sibirica_newGene_839;PaF106G0600023689.01;PaF106G0300014353.01;PaF106G0500019033.01;PaF106G0300012622.01;PaF106G0200010051.01;PaF106G0400015716.01;PaF106G0800030702.01;PaF106G0400015745.01;PaF106G0800029863.01;PaF106G0800029665.01;PaF106G0200010116.01;PaF106G0600025…
GO:0006631	fatty acid metabolic process	12	-0.632098	-1.42771	0.0894309	0.866663	3058	PaF106G0600025689.01;PaF106G0400016068.01;PaF106G0800032688.01
GO:0009738	abscisic acid-activated signaling pathway	26	-0.518974	-1.36429	0.0897704	0.866663	5834	PaF106G0100001477.01;PaF106G0100001453.01;PaF106G0100001462.01;PaF106G0600024910.01;PaF106G0100001474.01;PaF106G0100001456.01;PaF106G0100001454.01;PaF106G0100001464.01;PaF106G0100001471.01;PaF106G0100005549.01;PaF106G0200010859.01;PaF106G0100001468.01
GO:0009607	response to biotic stimulus	94	-0.380808	-1.28898	0.0907173	0.866663	675	PaF106G0200009483.01;PaF106G0300013611.01;PaF106G0100001468.01;PaF106G0300012225.01;PaF106G0400015280.01;PaF106G0400015292.01;PaF106G0400015287.01
GO:0065003	macromolecular complex assembly	29	0.510415	1.37557	0.0910816	0.866663	699	Prunus_sibirica_newGene_167;PaF106G0200010593.01;PaF106G0300013257.01
GO:0070887	cellular response to chemical stimulus	68	0.401447	1.28629	0.0948767	0.891049	1263	PaF106G0800030462.01;PaF106G0100001269.01;PaF106G0400016036.01;PaF106G0100001268.01;PaF106G0400018009.01;PaF106G0700028154.01;PaF106G0100005931.01;PaF106G0300010980.01
GO:0071495	cellular response to endogenous stimulus	42	0.452097	1.32697	0.0967118	0.89664	2670	PaF106G0800030462.01;PaF106G0100001269.01;PaF106G0400016036.01;PaF106G0100001268.01;PaF106G0100005931.01;PaF106G0300010980.01;PaF106G0100001867.01;PaF106G0100000914.01;PaF106G0300012566.01;PaF106G0100001274.01
GO:0009605	response to external stimulus	89	-0.379603	-1.28423	0.100616	0.916527	675	PaF106G0200009483.01;PaF106G0300013611.01;PaF106G0300012225.01;PaF106G0400015280.01;PaF106G0400015292.01;PaF106G0400015287.01
GO:0032981	mitochondrial respiratory chain complex I assembly	16	0.594267	1.39452	0.101392	0.916527	1414	PaF106G0400017578.01;PaF106G0400017564.01;PaF106G0600025034.01
GO:0090351	seedling development	17	0.58268	1.39451	0.103922	0.920236	1509	PaF106G0600022481.01;PaF106G0100000204.01;PaF106G0800029684.01;PaF106G0200008241.01
GO:0045489	pectin biosynthetic process	12	0.626796	1.38166	0.105882	0.920236	4061	PaF106G0800032782.01;PaF106G0100002227.01;PaF106G0300012550.01;PaF106G0400015825.01;PaF106G0300011548.01
GO:0009793	embryo development ending in seed dormancy	68	-0.388673	-1.26193	0.107368	0.920236	6167	PaF106G0300011185.01;PaF106G0100004361.01;PaF106G0800032714.01;PaF106G0300013862.01;PaF106G0100006732.01;PaF106G0200010668.01;PaF106G0300012405.01;PaF106G0100001845.01;PaF106G0800029757.01;PaF106G0200007211.01;PaF106G0600023149.01;PaF106G0100006270.01;PaF106G0100003918.01;PaF106G0300011785.01;PaF106G0500021073.01;PaF106G0300013861.01;PaF106G0700026051.01;PaF106G0400017100.01;PaF106G0700027689.01;…
GO:0006261	DNA-dependent DNA replication	16	-0.573962	-1.39725	0.108216	0.920236	2630	Prunus_sibirica_newGene_392;PaF106G0200010116.01;Prunus_sibirica_newGene_521;PaF106G0100001351.01;PaF106G0800032113.01
GO:0000079	regulation of cyclin-dependent protein serine/threonine kinase activity	23	-0.523005	-1.35882	0.110187	0.920236	3228	PaF106G0200008364.01;PaF106G0600021618.01;PaF106G0200010216.01;PaF106G0200008551.01;PaF106G0800030934.01;PaF106G0100005004.01;PaF106G0400017963.01;PaF106G0600021620.01;PaF106G0800030995.01
GO:0048868	pollen tube development	13	0.605724	1.36067	0.11546	0.920236	4625	PaF106G0600024841.01;PaF106G0800031242.01;PaF106G0300011240.01;PaF106G0400018179.01;PaF106G0600021767.01;PaF106G0800029477.01;PaF106G0100000510.01
GO:0032774	RNA biosynthetic process	12	0.615828	1.35748	0.115686	0.920236	1103	Prunus_sibirica_newGene_167;PaF106G0100000058.01
GO:0097659	nucleic acid-templated transcription	12	0.615828	1.35748	0.115686	0.920236	1103	Prunus_sibirica_newGene_167;PaF106G0100000058.01
GO:0043933	macromolecular complex subunit organization	30	0.491543	1.33276	0.119318	0.920236	699	Prunus_sibirica_newGene_167;PaF106G0200010593.01;PaF106G0300013257.01
GO:0001101	response to acid chemical	85	0.369392	1.23554	0.119772	0.920236	2993	PaF106G0800030462.01;PaF106G0100001269.01;PaF106G0400016036.01;PaF106G0100001268.01;PaF106G0100003928.01;PaF106G0300011189.01;PaF106G0500019963.01;PaF106G0400018014.01;PaF106G0400017937.01;PaF106G0100001867.01;PaF106G0100000914.01;PaF106G0300012566.01;PaF106G0500020161.01;PaF106G0100001274.01;PaF106G0200008488.01;PaF106G0400015808.01
GO:0017148	negative regulation of translation	10	0.647578	1.38485	0.120155	0.920236	2817	PaF106G0300011255.01;Prunus_sibirica_newGene_35
GO:0009856	pollination	10	0.642888	1.37483	0.122093	0.920236	4625	PaF106G0600024841.01;PaF106G0800031242.01;PaF106G0300011240.01;PaF106G0400018179.01;PaF106G0600021767.01;PaF106G0800029477.01;PaF106G0100000510.01
GO:0044706	multi-multicellular organism process	10	0.642888	1.37483	0.122093	0.920236	4625	PaF106G0600024841.01;PaF106G0800031242.01;PaF106G0300011240.01;PaF106G0400018179.01;PaF106G0600021767.01;PaF106G0800029477.01;PaF106G0100000510.01
GO:0000209	protein polyubiquitination	54	-0.400405	-1.25356	0.124473	0.920236	2370	PaF106G0700026994.01;PaF106G0500019462.01;PaF106G0400015143.01;PaF106G0300011178.01;PaF106G0100004522.01;PaF106G0500018911.01;PaF106G0500018912.01
GO:0006979	response to oxidative stress	93	0.364729	1.23244	0.125241	0.920236	2116	PaF106G0800030462.01;PaF106G0400014792.01;PaF106G0400016036.01;PaF106G0600021498.01;PaF106G0400018009.01;PaF106G0300011189.01;PaF106G0700028154.01;PaF106G0200010085.01;PaF106G0700027967.01;PaF106G0600023855.01;PaF106G0600024378.01;PaF106G0600023856.01;PaF106G0100003000.01;PaF106G0500019677.01;PaF106G0600023854.01;PaF106G0100001867.01;PaF106G0600021523.01
GO:0017144	drug metabolic process	10	-0.636964	-1.37118	0.125514	0.920236	675	PaF106G0500020147.01;PaF106G0200009220.01;PaF106G0200009482.01;PaF106G0500018649.01
GO:0071310	cellular response to organic substance	49	0.417906	1.26492	0.127103	0.920236	2670	PaF106G0800030462.01;PaF106G0100001269.01;PaF106G0400016036.01;PaF106G0100001268.01;PaF106G0100005931.01;PaF106G0300010980.01;PaF106G0100001867.01;PaF106G0100000914.01;PaF106G0300012566.01;PaF106G0100001274.01
GO:0006302	double-strand break repair	15	-0.566881	-1.35217	0.127237	0.920236	2086	PaF106G0200009827.01;PaF106G0300013700.01;PaF106G0500020131.01;PaF106G0700027031.01;PaF106G0400015609.01;PaF106G0100002106.01;PaF106G0700027028.01;PaF106G0400018191.01;PaF106G0300012173.01;PaF106G0700027029.01
GO:2000241	regulation of reproductive process	30	-0.470063	-1.29264	0.128692	0.920236	5248	PaF106G0100001000.01;PaF106G0800030127.01;PaF106G0200009155.01;PaF106G0600023689.01;PaF106G0100004621.01;PaF106G0400015551.01;PaF106G0100001998.01;PaF106G0400015550.01;PaF106G0100001994.01;PaF106G0100000013.01
GO:0090698	post-embryonic plant morphogenesis	15	-0.565394	-1.34862	0.129225	0.920236	1477	PaF106G0300013611.01;Prunus_sibirica_newGene_1788
GO:0009719	response to endogenous stimulus	102	0.353207	1.20756	0.130268	0.920236	1263	PaF106G0800030462.01;PaF106G0100001269.01;PaF106G0400016036.01;PaF106G0100004288.01;PaF106G0100001268.01;PaF106G0100003928.01;PaF106G0300011189.01;PaF106G0800029443.01;PaF106G0100006001.01;PaF106G0100005931.01;PaF106G0300010980.01
GO:0009116	nucleoside metabolic process	20	-0.513055	-1.31243	0.131737	0.920236	4104	PaF106G0800030681.01;PaF106G0200007198.01;PaF106G0300012520.01;PaF106G0100005236.01;PaF106G0500019355.01;PaF106G0200009401.01
GO:0031668	cellular response to extracellular stimulus	13	0.594652	1.3358	0.133072	0.920236	2570	PaF106G0800030114.01;PaF106G0300010980.01;PaF106G0100000725.01
GO:0044283	small molecule biosynthetic process	21	-0.514113	-1.3288	0.134538	0.920236	4430	PaF106G0300014353.01;PaF106G0500019033.01;PaF106G0400015716.01;PaF106G0800030702.01;PaF106G0400015745.01;PaF106G0600023422.01;PaF106G0500018541.01;PaF106G0200009482.01;PaF106G0500018649.01;PaF106G0600023506.01;PaF106G0600024640.01
GO:1902600	hydrogen ion transmembrane transport	10	0.626617	1.34003	0.137597	0.920236	3402	PaF106G0300013527.01;PaF106G0700026165.01;PaF106G0300014256.01;PaF106G0700026049.01;PaF106G0100005346.01
GO:1901566	organonitrogen compound biosynthetic process	17	-0.5437	-1.34325	0.138211	0.920236	4820	PaF106G0400015883.01;PaF106G0300012622.01;PaF106G0200010051.01;PaF106G0400015716.01;PaF106G0600025385.01;PaF106G0300012225.01
GO:0007154	cell communication	76	0.376	1.23201	0.139623	0.920236	1263	PaF106G0800030462.01;PaF106G0100001269.01;PaF106G0400016036.01;PaF106G0800030114.01;PaF106G0100001268.01;PaF106G0100005931.01;PaF106G0200010482.01;PaF106G0300010980.01
GO:0000373	Group II intron splicing	10	-0.625557	-1.34663	0.139918	0.920236	5909	PaF106G0300013862.01;PaF106G0800031225.01;PaF106G0400016936.01;PaF106G0100003031.01;PaF106G0300013861.01;PaF106G0300012872.01
GO:0043170	macromolecule metabolic process	438	-0.271718	-1.10936	0.142268	0.920236	5602	PaF106G0600022391.01;PaF106G0200008038.01;PaF106G0300011161.01;PaF106G0400015021.01;PaF106G0800029764.01;PaF106G0400017996.01;PaF106G0200007558.01;PaF106G0800032683.01;PaF106G0200010668.01;PaF106G0800030541.01;PaF106G0100000819.01;PaF106G0300014347.01;Prunus_sibirica_newGene_2008;PaF106G0400015609.01;PaF106G0500021221.01;PaF106G0100005714.01;PaF106G0100005364.01;PaF106G0100000752.01;PaF106G060002…
GO:0032870	cellular response to hormone stimulus	40	0.439945	1.27928	0.142857	0.920236	2670	PaF106G0800030462.01;PaF106G0100001269.01;PaF106G0400016036.01;PaF106G0100001268.01;PaF106G0100005931.01;PaF106G0100001867.01;PaF106G0100000914.01;PaF106G0300012566.01;PaF106G0100001274.01
GO:0051094	positive regulation of developmental process	12	-0.586736	-1.32525	0.144309	0.920236	4523	PaF106G0400015552.01;PaF106G0700027498.01;PaF106G0800030127.01;PaF106G0400015551.01;PaF106G0200009547.01;PaF106G0400015550.01
GO:0018193	peptidyl-amino acid modification	21	-0.504411	-1.30373	0.144578	0.920236	2391	PaF106G0800031267.01;PaF106G0100000133.01;PaF106G0100001994.01;PaF106G0100000013.01;PaF106G0100000111.01
GO:0009814	defense response, incompatible interaction	13	0.588057	1.32098	0.144814	0.920236	3886	PaF106G0800030462.01;PaF106G0100001867.01;PaF106G0300012465.01;PaF106G0400017027.01;PaF106G0800029453.01
GO:0009630	gravitropism	11	0.609731	1.3321	0.145068	0.920236	4697	PaF106G0600024203.01;PaF106G0500020263.01;PaF106G0300010984.01;Prunus_sibirica_newGene_793;PaF106G0100003899.01;PaF106G0500018539.01;PaF106G0600024072.01;Prunus_sibirica_newGene_1843
GO:0008033	tRNA processing	19	-0.519282	-1.30274	0.148676	0.923398	3730	PaF106G0600021899.01;PaF106G0500020688.01;PaF106G0100006686.01;PaF106G0800032136.01
GO:0031123	RNA 3'-end processing	15	-0.555813	-1.32577	0.149105	0.923398	2554	PaF106G0400018443.01;PaF106G0500020950.01;PaF106G0800032136.01
GO:0090501	RNA phosphodiester bond hydrolysis	17	-0.540526	-1.33541	0.150407	0.923398	3556	PaF106G0700028560.01;PaF106G0500020688.01;PaF106G0400018443.01;PaF106G0600024953.01;PaF106G0500018662.01;PaF106G0800032136.01
GO:0000028	ribosomal small subunit assembly	15	-0.553423	-1.32007	0.151093	0.923398	8060	PaF106G0100002671.01;PaF106G0200007241.01;PaF106G0100006149.01;PaF106G0100005792.01;PaF106G0500020906.01;PaF106G0100002600.01;PaF106G0800030246.01;PaF106G0400017366.01;PaF106G0300013707.01;PaF106G0100006288.01
GO:0006950	response to stress	191	-0.304459	-1.1515	0.151951	0.923398	3653	PaF106G0700028507.01;PaF106G0300012694.01;PaF106G0200010379.01;PaF106G0300013586.01;PaF106G0100004529.01;PaF106G0700026675.01;PaF106G0100003185.01;PaF106G0100005405.01;PaF106G0100004621.01;PaF106G0400015745.01;PaF106G0400015551.01;PaF106G0600024594.01;PaF106G0100004232.01;PaF106G0400018079.01;PaF106G0400018285.01;Prunus_sibirica_newGene_1608;PaF106G0400016260.01;PaF106G0200007263.01;PaF106G010000…
GO:0006364	rRNA processing	59	-0.380648	-1.21705	0.154167	0.924572	167	PaF106G0400015833.01;PaF106G0100005185.01;PaF106G0100000165.01;PaF106G0800029373.01;PaF106G0400017264.01;PaF106G0400016651.01;PaF106G0400017451.01;PaF106G0100005362.01;PaF106G0100005181.01;PaF106G0100003333.01;PaF106G0800031586.01;Prunus_sibirica_newGene_2188;PaF106G0800029759.01;PaF106G0400018443.01;PaF106G0400016714.01;Prunus_sibirica_newGene_1796;PaF106G0800031314.01;PaF106G0200007169.01
GO:0007389	pattern specification process	34	-0.443273	-1.25004	0.15625	0.924572	1477	PaF106G0600021578.01;PaF106G0100004719.01;PaF106G0300013611.01;PaF106G0100000013.01;Prunus_sibirica_newGene_1788
GO:0006259	DNA metabolic process	24	-0.491	-1.28578	0.156823	0.924572	5287	PaF106G0100000165.01;PaF106G0400015609.01;PaF106G0600023304.01;PaF106G0100002106.01;PaF106G0700027028.01;PaF106G0300013586.01;PaF106G0800029863.01;PaF106G0800029665.01;PaF106G0200010116.01;PaF106G0800030287.01;PaF106G0300011178.01;PaF106G0700027029.01
GO:0044238	primary metabolic process	456	-0.269612	-1.10926	0.158103	0.924572	5602	PaF106G0600022391.01;PaF106G0200008038.01;PaF106G0300011161.01;PaF106G0400015021.01;PaF106G0800029764.01;PaF106G0400017996.01;PaF106G0200007558.01;PaF106G0800032683.01;PaF106G0200010668.01;PaF106G0800030541.01;PaF106G0100000819.01;PaF106G0300014347.01;Prunus_sibirica_newGene_2008;PaF106G0400015609.01;PaF106G0500021221.01;PaF106G0100005714.01;PaF106G0100005364.01;PaF106G0100000752.01;PaF106G060002…
GO:0000462	maturation of SSU-rRNA from tricistronic rRNA transcript (SSU-rRNA, 5.8S rRNA, LSU-rRNA)	22	-0.495859	-1.27622	0.158537	0.924572	3133	PaF106G0100005198.01;PaF106G0100006323.01;PaF106G0100000206.01;PaF106G0300013707.01;PaF106G0100004300.01
GO:0006541	glutamine metabolic process	22	-0.493516	-1.27019	0.162602	0.935215	4630	PaF106G0100003986.01;PaF106G0100004771.01;PaF106G0800032591.01;PaF106G0600023427.01;PaF106G0100006244.01;PaF106G0800032659.01;PaF106G0400015669.01;PaF106G0300014113.01;PaF106G0100001205.01;PaF106G0600021550.01
GO:0055085	transmembrane transport	89	0.349538	1.17411	0.163107	0.935215	3665	PaF106G0400015437.01;PaF106G0100006206.01;PaF106G0100001225.01;PaF106G0800029996.01;Prunus_sibirica_newGene_1780;PaF106G0400015974.01;PaF106G0800029993.01;PaF106G0800029394.01;PaF106G0800029415.01;PaF106G0100001226.01;PaF106G0600022338.01;PaF106G0800029999.01;PaF106G0600024539.01;PaF106G0300010983.01;PaF106G0100006119.01;PaF106G0100004168.01;PaF106G0700029069.01;PaF106G0600021683.01;PaF106G080003…
GO:0051276	chromosome organization	41	-0.420599	-1.23127	0.164241	0.935215	4869	PaF106G0100001520.01;PaF106G0100002106.01;PaF106G0700027028.01;PaF106G0200009220.01;PaF106G0200010278.01;PaF106G0400015551.01;PaF106G0800029863.01;PaF106G0100001998.01;PaF106G0200010116.01;PaF106G0800030287.01;PaF106G0400015550.01;PaF106G0100002999.01;PaF106G0100001994.01;PaF106G0500018649.01;PaF106G0700027029.01
GO:0006952	defense response	206	-0.29639	-1.13049	0.168357	0.939399	839	PaF106G0800032797.01;PaF106G0200006964.01;PaF106G0200008254.01;PaF106G0600024957.01;Prunus_sibirica_newGene_1082;PaF106G0100003880.01;PaF106G0400015550.01;PaF106G0100001857.01;PaF106G0600024417.01;PaF106G0100003882.01;PaF106G0100003883.01;PaF106G0400015359.01;PaF106G0200008249.01;PaF106G0200009483.01;PaF106G0300013611.01;PaF106G0200008252.01;PaF106G0100001468.01;PaF106G0100001853.01;PaF106G030001…
GO:0034620	cellular response to unfolded protein	19	-0.506031	-1.26949	0.169043	0.939399	2638	PaF106G0200009790.01;PaF106G0100000264.01;PaF106G0700027849.01;PaF106G0700027837.01;PaF106G0700027850.01
GO:0019438	aromatic compound biosynthetic process	37	-0.432795	-1.2402	0.169734	0.939399	1071	PaF106G0300011178.01;PaF106G0800030531.01;PaF106G0200009482.01;PaF106G0800030528.01;PaF106G0300013106.01;PaF106G0300013243.01
GO:0015074	DNA integration	26	0.489291	1.29232	0.170172	0.939399	198	PaF106G0500019567.01;PaF106G0100006528.01;PaF106G0100001469.01;PaF106G0100000829.01;PaF106G0500019143.01;PaF106G0700027867.01;PaF106G0600023999.01
GO:0071396	cellular response to lipid	14	-0.550363	-1.28819	0.171937	0.94195	592	PaF106G0200009220.01;PaF106G0600024829.01;PaF106G0500018649.01;PaF106G0300013611.01
GO:0009617	response to bacterium	42	0.416498	1.22248	0.17795	0.960341	835	PaF106G0800030462.01;PaF106G0400016036.01;PaF106G0100004288.01;PaF106G0600024874.01
GO:0016573	histone acetylation	11	0.597714	1.30585	0.17795	0.960341	2031	Prunus_sibirica_newGene_167;PaF106G0100003412.01
GO:0006793	phosphorus metabolic process	34	-0.4303	-1.21346	0.18125	0.96766	3058	PaF106G0800029856.01;PaF106G0800029863.01;PaF106G0800031267.01;PaF106G0800030287.01;PaF106G0500020831.01;Prunus_sibirica_newGene_1959;PaF106G0100004949.01;PaF106G0100000013.01
GO:0006342	chromatin silencing	17	-0.516947	-1.27716	0.182927	0.96766	4571	PaF106G0100005460.01;PaF106G0400018005.01;PaF106G0700026316.01;PaF106G0800029743.01;PaF106G0600022353.01;PaF106G0600021506.01;PaF106G0600025382.01;PaF106G0600022625.01
GO:0090696	post-embryonic plant organ development	13	-0.548952	-1.26701	0.185336	0.96766	200	PaF106G0200010457.01;PaF106G0100003185.01;Prunus_sibirica_newGene_1788
GO:0030162	regulation of proteolysis	19	0.521015	1.28404	0.18591	0.96766	4031	PaF106G0300011024.01;PaF106G0100005658.01;PaF106G0600021737.01;PaF106G0100005656.01;PaF106G0300012465.01;PaF106G0400017027.01;PaF106G0600022565.01;PaF106G0100003259.01
GO:0048580	regulation of post-embryonic development	38	-0.419741	-1.21227	0.186613	0.96766	5874	PaF106G0800032714.01;PaF106G0100005714.01;PaF106G0100001000.01;PaF106G0800030127.01;PaF106G0200009155.01;PaF106G0600023689.01;PaF106G0300013267.01;PaF106G0100004621.01;PaF106G0400015551.01;PaF106G0200009547.01;PaF106G0100001998.01;PaF106G0400015550.01;PaF106G0100001994.01;PaF106G0100000013.01
GO:0016117	carotenoid biosynthetic process	10	-0.600288	-1.29223	0.1893	0.96766	5095	PaF106G0600025580.01;PaF106G0300011464.01;PaF106G0100002657.01;PaF106G0100002035.01;PaF106G0700027669.01;PaF106G0600023033.01
GO:0071407	cellular response to organic cyclic compound	14	0.559868	1.27415	0.189516	0.96766	1123	PaF106G0800030462.01;PaF106G0400016036.01;PaF106G0100005931.01
GO:0051186	cofactor metabolic process	18	-0.503524	-1.25404	0.192623	0.96766	4155	PaF106G0200010051.01;PaF106G0100003185.01;PaF106G0800030702.01;PaF106G0100000650.01;PaF106G0600023422.01;PaF106G0100000656.01;PaF106G0600023506.01
GO:0007264	small GTPase mediated signal transduction	15	0.547723	1.26743	0.194389	0.96766	831	PaF106G0600023951.01;PaF106G0800031890.01;PaF106G0800031767.01
GO:0007166	cell surface receptor signaling pathway	16	0.531887	1.24814	0.194831	0.96766	3352	PaF106G0800030782.01;PaF106G0400017172.01;PaF106G0800030797.01;PaF106G0400017223.01;PaF106G0600022319.01;PaF106G0700027683.01;PaF106G0400017194.01
GO:0071496	cellular response to external stimulus	17	0.515401	1.2335	0.196078	0.96766	2570	PaF106G0800030114.01;PaF106G0300010980.01;PaF106G0100000725.01
GO:0048366	leaf development	31	-0.438564	-1.21465	0.197095	0.96766	3908	PaF106G0100005568.01;PaF106G0800029613.01;PaF106G0600025124.01;PaF106G0400015551.01;PaF106G0200009304.01;PaF106G0600025859.01;PaF106G0600024737.01;PaF106G0400015550.01;PaF106G0600025658.01;PaF106G0300012225.01
GO:0014070	response to organic cyclic compound	33	0.444581	1.22447	0.197674	0.96766	2095	PaF106G0800030462.01;PaF106G0400016036.01;PaF106G0100006001.01;PaF106G0100005931.01;PaF106G0400017937.01;PaF106G0100001867.01
GO:0031667	response to nutrient levels	12	0.576463	1.27071	0.198039	0.96766	4379	PaF106G0800030114.01;PaF106G0300010980.01;PaF106G0100000725.01;PaF106G0400015823.01;PaF106G0800029493.01
GO:0010033	response to organic substance	125	0.330042	1.15622	0.200389	0.969958	1263	PaF106G0800030462.01;PaF106G0100001269.01;PaF106G0400016036.01;PaF106G0100004288.01;PaF106G0100001268.01;PaF106G0100003928.01;PaF106G0300011189.01;PaF106G0800029443.01;PaF106G0600024874.01;PaF106G0100006001.01;PaF106G0100005931.01;PaF106G0300010980.01
GO:0006412	translation	270	-0.281224	-1.10395	0.201232	0.969958	7212	PaF106G0200010812.01;PaF106G0800029679.01;PaF106G0100002326.01;PaF106G0100003708.01;PaF106G0100002020.01;PaF106G0800030135.01;PaF106G0100005792.01;PaF106G0800030251.01;PaF106G0300013511.01;PaF106G0600022470.01;PaF106G0800031450.01;PaF106G0100006369.01;PaF106G0100001796.01;PaF106G0700026577.01;PaF106G0400016931.01;PaF106G0200008329.01;PaF106G0600023818.01;PaF106G0100001024.01;PaF106G0100000254.01;…
GO:2000024	regulation of leaf development	10	-0.589852	-1.26977	0.203704	0.969958	4523	PaF106G0200009622.01;PaF106G0400015551.01;PaF106G0400015550.01;PaF106G0500019379.01
GO:0090567	reproductive shoot system development	22	-0.479076	-1.23303	0.20935	0.969958	324	PaF106G0800032714.01;PaF106G0400017298.01;PaF106G0600023689.01;PaF106G0100000013.01;Prunus_sibirica_newGene_1788
GO:0009991	response to extracellular stimulus	16	0.52497	1.23191	0.210736	0.969958	4379	PaF106G0800030114.01;PaF106G0300010980.01;PaF106G0100000725.01;PaF106G0400015823.01;PaF106G0800029493.01
GO:0042594	response to starvation	11	0.584038	1.27597	0.210832	0.969958	4379	PaF106G0800030114.01;PaF106G0100000725.01;PaF106G0200008321.01;PaF106G0400015823.01;PaF106G0800029493.01
GO:0006986	response to unfolded protein	18	-0.496299	-1.23604	0.211066	0.969958	783	PaF106G0200009790.01;PaF106G0700027849.01;PaF106G0700027837.01;PaF106G0700027850.01
GO:0042546	cell wall biogenesis	33	0.440498	1.21323	0.21124	0.969958	3236	PaF106G0800030157.01;PaF106G0100000801.01;PaF106G0800030158.01;PaF106G0100003334.01;PaF106G0100003078.01;PaF106G0300012535.01;PaF106G0300012534.01;PaF106G0600024367.01;PaF106G0300012531.01
GO:0006399	tRNA metabolic process	12	-0.544282	-1.22936	0.215447	0.969958	2554	PaF106G0400018443.01;PaF106G0400017693.01;PaF106G0800032136.01
GO:0042221	response to chemical	181	0.297208	1.10385	0.218216	0.969958	2158	PaF106G0800030462.01;PaF106G0100001269.01;PaF106G0400016036.01;PaF106G0100004288.01;PaF106G0100001268.01;PaF106G0400018009.01;PaF106G0100003928.01;PaF106G0300011189.01;PaF106G0800029443.01;PaF106G0600024874.01;PaF106G0700028154.01;PaF106G0700027967.01;PaF106G0100006001.01;PaF106G0100005931.01;PaF106G0100000204.01;PaF106G0300010980.01;PaF106G0800029684.01;PaF106G0500018620.01;PaF106G0500019963.01;…
GO:0006281	DNA repair	96	-0.337577	-1.15175	0.21875	0.969958	3436	PaF106G0200006995.01;PaF106G0300013509.01;PaF106G0100003857.01;PaF106G0500020545.01;PaF106G0300012555.01;PaF106G0300013963.01;PaF106G0100005768.01;PaF106G0400014898.01;PaF106G0200010116.01;PaF106G0100003128.01;PaF106G0700026776.01;PaF106G0500020851.01;PaF106G0600024458.01;PaF106G0600024108.01;PaF106G0600022812.01;PaF106G0400017286.01;PaF106G0600021884.01;PaF106G0100005353.01;PaF106G0600022709.01;…
GO:0009753	response to jasmonic acid	25	0.476314	1.24414	0.219231	0.969958	2670	PaF106G0100001269.01;PaF106G0400016036.01;PaF106G0100001268.01;PaF106G0400017937.01;PaF106G0100000914.01;PaF106G0100001274.01
GO:0048646	anatomical structure formation involved in morphogenesis	20	-0.470402	-1.20332	0.219561	0.969958	405	PaF106G0600023689.01;PaF106G0300013611.01;Prunus_sibirica_newGene_1788
GO:0006367	transcription initiation from RNA polymerase II promoter	18	0.50377	1.22192	0.219844	0.969958	203	Prunus_sibirica_newGene_167
GO:0043086	negative regulation of catalytic activity	15	-0.514253	-1.22664	0.220676	0.969958	4533	PaF106G0600023916.01;PaF106G0800032140.01;PaF106G0400014772.01;PaF106G0400018048.01;PaF106G0200010333.01;PaF106G0400018050.01;PaF106G0500019067.01
GO:0010411	xyloglucan metabolic process	23	0.467701	1.20176	0.220729	0.969958	1662	PaF106G0800030157.01;PaF106G0100000801.01;PaF106G0800030158.01;PaF106G0100003078.01;PaF106G0300012535.01
GO:0009639	response to red or far red light	18	-0.493108	-1.2281	0.221311	0.969958	4625	PaF106G0200009155.01;PaF106G0100003185.01;PaF106G0600021878.01;PaF106G0400016344.01;PaF106G0600022111.01;PaF106G0600024230.01;PaF106G0400017512.01
GO:0042545	cell wall modification	35	0.429421	1.2	0.222656	0.969974	1908	PaF106G0700026834.01;PaF106G0600025342.01;PaF106G0700026837.01;PaF106G0300014581.01;PaF106G0100001639.01;PaF106G0100001361.01;PaF106G0800029359.01
GO:0005975	carbohydrate metabolic process	251	-0.282522	-1.09722	0.227823	0.976959	1452	PaF106G0500018538.01;PaF106G0200009146.01;PaF106G0500018693.01;PaF106G0100001296.01;PaF106G0100003396.01;PaF106G0100002490.01;PaF106G0100000173.01;PaF106G0400015607.01;PaF106G0400018077.01;PaF106G0100002489.01;PaF106G0200009421.01;PaF106G0200009704.01;PaF106G0800030844.01;PaF106G0700026044.01;PaF106G0700026042.01;PaF106G0200010394.01;PaF106G0100002481.01;PaF106G0600024201.01;PaF106G0100000111.01;…
GO:0009627	systemic acquired resistance	14	0.538353	1.22518	0.229839	0.976959	550	PaF106G0800030462.01;PaF106G0800030277.01
GO:0006897	endocytosis	20	0.481188	1.19764	0.231537	0.976959	2259	PaF106G0800030402.01;PaF106G0300012095.01;PaF106G0100000873.01
GO:0034622	cellular macromolecular complex assembly	21	0.482309	1.2133	0.232143	0.976959	699	Prunus_sibirica_newGene_167;PaF106G0300013257.01
GO:0009860	pollen tube growth	12	0.559866	1.23412	0.233333	0.976959	4625	PaF106G0600024841.01;PaF106G0800031242.01;PaF106G0300011240.01;PaF106G0400018179.01;PaF106G0500020188.01;PaF106G0800029477.01;PaF106G0100000510.01
GO:0009058	biosynthetic process	125	-0.312482	-1.10986	0.233607	0.976959	4457	PaF106G0200009220.01;PaF106G0500020612.01;PaF106G0400015883.01;Prunus_sibirica_newGene_839;PaF106G0600023689.01;PaF106G0300014353.01;PaF106G0500019033.01;PaF106G0300012622.01;PaF106G0200010051.01;PaF106G0400015716.01;PaF106G0300013065.01;PaF106G0400016747.01;PaF106G0800030702.01;PaF106G0400015745.01;PaF106G0800030718.01;PaF106G0500019751.01;PaF106G0800029863.01;PaF106G0200010556.01;PaF106G0800029…
GO:0040007	growth	32	0.436487	1.19769	0.233716	0.976959	5049	PaF106G0600024841.01;PaF106G0100006001.01;PaF106G0700027112.01;PaF106G0800031242.01;PaF106G0800029430.01;PaF106G0700027098.01;PaF106G0300011240.01;PaF106G0400018179.01;PaF106G0100006002.01;PaF106G0100003400.01;PaF106G0200008575.01;PaF106G0800029477.01;PaF106G0100000510.01;PaF106G0800031792.01;PaF106G0500020982.01
GO:0006357	regulation of transcription from RNA polymerase II promoter	74	0.353618	1.1544	0.236742	0.981884	6699	PaF106G0800030463.01;Prunus_sibirica_newGene_167;PaF106G0500020561.01;PaF106G0100003412.01;PaF106G0600025395.01;PaF106G0500020520.01;PaF106G0500018967.01;PaF106G0100001870.01;PaF106G0500019544.01;PaF106G0400015823.01;PaF106G0200007230.01;PaF106G0500019735.01;PaF106G0100003400.01;PaF106G0800032701.01;PaF106G0700028095.01;PaF106G0300014276.01;PaF106G0500020038.01;PaF106G0800031539.01;PaF106G0700027…
GO:0010565	regulation of cellular ketone metabolic process	11	0.569734	1.24472	0.237911	0.981884	135	PaF106G0400016036.01
GO:0090615	mitochondrial mRNA processing	12	0.553808	1.22077	0.241176	0.981884	1509	PaF106G0600022481.01;PaF106G0200008241.01
GO:1901700	response to oxygen-containing compound	109	0.323075	1.11705	0.241905	0.981884	2785	PaF106G0800030462.01;PaF106G0100001269.01;PaF106G0400016036.01;PaF106G0100001268.01;PaF106G0100003928.01;PaF106G0300011189.01;PaF106G0700027967.01;PaF106G0100006001.01;PaF106G0100005931.01;PaF106G0500019963.01;PaF106G0400018014.01;PaF106G0400017937.01;PaF106G0100001867.01;PaF106G0100000914.01;PaF106G0300012566.01;PaF106G0500020161.01;PaF106G0100001274.01;PaF106G0200008488.01
GO:0006629	lipid metabolic process	93	-0.330894	-1.12531	0.242236	0.981884	2541	PaF106G0600022924.01;PaF106G0600025850.01;PaF106G0300012491.01;PaF106G0800029810.01;PaF106G0600022928.01;PaF106G0600022944.01;PaF106G0800029758.01;PaF106G0300011298.01;PaF106G0100004266.01;PaF106G0400017302.01;PaF106G0100004262.01;PaF106G0300011292.01;PaF106G0300013292.01;PaF106G0500019925.01;PaF106G0600022919.01;PaF106G0100004949.01;PaF106G0600022918.01;PaF106G0200007737.01;PaF106G0700028234.01;…
GO:0099402	plant organ development	59	-0.358048	-1.14479	0.24375	0.981884	5852	PaF106G0800032714.01;PaF106G0100002316.01;PaF106G0200010692.01;PaF106G0300012405.01;PaF106G0400017298.01;PaF106G0200010457.01;PaF106G0600023689.01;PaF106G0100000005.01;PaF106G0500021073.01;PaF106G0100003185.01;PaF106G0400015551.01;PaF106G0800029856.01;PaF106G0500020831.01;PaF106G0600024690.01;PaF106G0600024737.01;PaF106G0400015550.01;PaF106G0300012225.01;Prunus_sibirica_newGene_1788
GO:0009723	response to ethylene	15	0.528941	1.22397	0.244489	0.981884	2314	PaF106G0100004288.01;PaF106G0300013927.01
GO:0000470	maturation of LSU-rRNA	12	-0.53241	-1.20255	0.245935	0.981884	7546	PaF106G0500020226.01;PaF106G0700027734.01;PaF106G0300013297.01;PaF106G0800032427.01;PaF106G0500021008.01;PaF106G0500018488.01;PaF106G0600022973.01
GO:0071555	cell wall organization	110	-0.31744	-1.10826	0.247401	0.981884	1818	PaF106G0100002572.01;PaF106G0500020912.01;PaF106G0600022695.01;PaF106G0100000039.01;PaF106G0100001296.01;PaF106G0400015909.01;PaF106G0500018795.01;PaF106G0100001977.01;PaF106G0600021666.01;PaF106G0200010176.01;PaF106G0300012164.01;PaF106G0100003015.01;PaF106G0200010558.01;PaF106G0300012156.01;PaF106G0300012161.01;PaF106G0300012159.01
GO:0030490	maturation of SSU-rRNA	13	-0.523727	-1.20879	0.248473	0.981884	6574	PaF106G0700027642.01;PaF106G0600023660.01;PaF106G0100006633.01;PaF106G0400017366.01;PaF106G0500018488.01;PaF106G0600023685.01;PaF106G0800029759.01;PaF106G0100006288.01
GO:0050793	regulation of developmental process	60	-0.355501	-1.14263	0.253638	0.983888	5928	PaF106G0700029251.01;PaF106G0100005404.01;PaF106G0800029283.01;PaF106G0100004361.01;PaF106G0800032714.01;PaF106G0100005714.01;PaF106G0100001000.01;PaF106G0800030127.01;PaF106G0200009155.01;PaF106G0800029865.01;PaF106G0600023689.01;PaF106G0300013267.01;PaF106G0100000393.01;PaF106G0100004621.01;PaF106G0400015551.01;PaF106G0200009547.01;PaF106G0300012530.01;PaF106G0100001998.01;PaF106G0600024924.01;…
GO:0006082	organic acid metabolic process	27	-0.432768	-1.15602	0.260331	0.983888	1024	PaF106G0300014484.01;PaF106G0600025163.01;PaF106G0300014353.01;PaF106G0400015716.01;Prunus_sibirica_newGene_1840;PaF106G0800030702.01;PaF106G0400015745.01;PaF106G0500018541.01;PaF106G0200009482.01;PaF106G0300012225.01;PaF106G0600024640.01
GO:0043436	oxoacid metabolic process	27	-0.432768	-1.15602	0.260331	0.983888	1024	PaF106G0300014484.01;PaF106G0600025163.01;PaF106G0300014353.01;PaF106G0400015716.01;Prunus_sibirica_newGene_1840;PaF106G0800030702.01;PaF106G0400015745.01;PaF106G0500018541.01;PaF106G0200009482.01;PaF106G0300012225.01;PaF106G0600024640.01
GO:0000302	response to reactive oxygen species	27	0.449839	1.18794	0.260618	0.983888	2186	PaF106G0800030462.01;PaF106G0400016036.01;PaF106G0700027967.01;PaF106G0800032923.01;PaF106G0100001867.01;PaF106G0800032934.01
GO:0006913	nucleocytoplasmic transport	10	-0.560259	-1.20606	0.265432	0.983888	6674	PaF106G0100005467.01;PaF106G0400014991.01;PaF106G0800029283.01;PaF106G0700026308.01;PaF106G0700028958.01;PaF106G0400018181.01
GO:0048638	regulation of developmental growth	11	-0.542107	-1.18833	0.265979	0.983888	4523	PaF106G0100000393.01;PaF106G0600024924.01;PaF106G0100000013.01
GO:0006605	protein targeting	15	-0.489984	-1.16875	0.26839	0.983888	1041	PaF106G0100000201.01;PaF106G0100000865.01;PaF106G0200008874.01
GO:0006898	receptor-mediated endocytosis	10	0.563021	1.20403	0.271318	0.983888	3890	PaF106G0400017421.01;PaF106G0100004516.01;PaF106G0700027230.01
GO:0080156	mitochondrial mRNA modification	20	0.464368	1.15578	0.271457	0.983888	1827	PaF106G0600022481.01;PaF106G0200008241.01;PaF106G0400016228.01
GO:0044772	mitotic cell cycle phase transition	15	-0.488541	-1.16531	0.272366	0.983888	3228	PaF106G0600021618.01;PaF106G0800030934.01;PaF106G0100005004.01;PaF106G0400017963.01;PaF106G0600021620.01;PaF106G0800030995.01
GO:0016556	mRNA modification	15	0.508807	1.17738	0.272545	0.983888	1509	PaF106G0600022481.01;PaF106G0200008241.01
GO:0003002	regionalization	25	-0.439321	-1.15095	0.273859	0.983888	1477	PaF106G0300013611.01;PaF106G0100000013.01;Prunus_sibirica_newGene_1788
GO:0023052	signaling	64	0.351963	1.11262	0.28327	0.983888	1186	PaF106G0800030462.01;PaF106G0100001269.01;PaF106G0400016036.01;PaF106G0100001268.01;PaF106G0100005931.01;PaF106G0200010482.01
GO:0010020	chloroplast fission	12	-0.517363	-1.16856	0.284553	0.983888	6659	PaF106G0300014389.01;PaF106G0200009150.01;PaF106G0800031312.01;PaF106G0500018518.01;PaF106G0100006470.01;PaF106G0400015576.01;PaF106G0100004031.01;PaF106G0500019938.01
GO:0010038	response to metal ion	35	-0.389016	-1.11564	0.285714	0.983888	4523	PaF106G0800029927.01;PaF106G0600023689.01;PaF106G0400015716.01;PaF106G0300011048.01;PaF106G0600022526.01;PaF106G0100004529.01;Prunus_sibirica_newGene_1608;PaF106G0100004463.01;PaF106G0100005147.01;PaF106G0200008710.01;PaF106G0600022140.01;PaF106G0800029928.01
GO:0048878	chemical homeostasis	18	-0.460874	-1.14782	0.288934	0.983888	4545	PaF106G0100000854.01;PaF106G0400015883.01;PaF106G0300011048.01;PaF106G0200009186.01;PaF106G0200009236.01;PaF106G0500020831.01;PaF106G0600024242.01;PaF106G0300012269.01;PaF106G0300012271.01
GO:0055114	oxidation-reduction process	77	0.335315	1.10754	0.289179	0.983888	4275	PaF106G0200010874.01;PaF106G0400015367.01;PaF106G0400018009.01;PaF106G0200007392.01;PaF106G0600024841.01;PaF106G0700028154.01;PaF106G0500019643.01;PaF106G0800030339.01;PaF106G0500018596.01;PaF106G0200009207.01;PaF106G0700026165.01;PaF106G0500020146.01;PaF106G0600022230.01;PaF106G0400017991.01;PaF106G0500020468.01;PaF106G0300012489.01;PaF106G0100001302.01;PaF106G0500020504.01;PaF106G0200008902.01;…
GO:0000413	protein peptidyl-prolyl isomerization	11	-0.530791	-1.16352	0.292784	0.983888	7253	PaF106G0800031788.01;PaF106G0700027489.01;PaF106G0200008734.01;PaF106G0600024688.01;PaF106G0700027919.01;PaF106G0800030230.01;PaF106G0100002706.01
GO:0042180	cellular ketone metabolic process	11	-0.530213	-1.16225	0.294845	0.983888	1769	PaF106G0500018541.01;PaF106G0600023506.01;PaF106G0600024640.01
GO:0061013	regulation of mRNA catabolic process	12	0.522082	1.15083	0.3	0.983888	2033	PaF106G0200006908.01;Prunus_sibirica_newGene_1207;PaF106G0800030376.01;PaF106G0300012207.01;PaF106G0800029541.01
GO:0042026	protein refolding	26	-0.425938	-1.11972	0.302714	0.983888	783	PaF106G0100003554.01;PaF106G0700027849.01;PaF106G0700027837.01;PaF106G0700027850.01
GO:0030001	metal ion transport	39	0.384323	1.11191	0.306043	0.983888	3407	PaF106G0200010781.01;PaF106G0600021730.01;PaF106G0600024306.01;PaF106G0200010782.01;PaF106G0500020094.01;PaF106G0100006454.01;PaF106G0100001479.01;PaF106G0200010564.01;PaF106G0800030615.01;PaF106G0200006775.01;PaF106G0100005890.01;PaF106G0200007910.01;PaF106G0600025376.01
GO:0055082	cellular chemical homeostasis	10	-0.534599	-1.15082	0.308642	0.983888	2222	PaF106G0200009236.01;PaF106G0500020831.01;PaF106G0300012269.01;PaF106G0300012271.01
GO:0010608	posttranscriptional regulation of gene expression	20	0.449758	1.11942	0.309381	0.983888	1989	PaF106G0700027967.01;Prunus_sibirica_newGene_1207;PaF106G0100005936.01;PaF106G0800030927.01;PaF106G0300012207.01
GO:0007018	microtubule-based movement	60	-0.340259	-1.09364	0.309771	0.983888	4054	PaF106G0200010513.01;PaF106G0600025416.01;PaF106G0600023930.01;PaF106G0600022418.01;PaF106G0100004913.01;PaF106G0700026376.01;PaF106G0100006121.01;PaF106G0100004282.01;PaF106G0800031230.01;PaF106G0700028460.01;PaF106G0700027895.01;PaF106G0600023185.01;PaF106G0600024568.01;PaF106G0600025553.01;PaF106G0400015516.01;PaF106G0400018008.01;PaF106G0600025458.01;PaF106G0100006122.01;PaF106G0600024508.01;…
GO:0006366	transcription from RNA polymerase II promoter	18	0.466794	1.13223	0.31323	0.983888	4053	Prunus_sibirica_newGene_167;PaF106G0400015246.01;PaF106G0200007230.01;PaF106G0600022207.01;PaF106G0600021397.01
GO:0030148	sphingolipid biosynthetic process	10	0.546489	1.16868	0.315891	0.983888	6728	PaF106G0600022138.01;PaF106G0600024698.01;PaF106G0600022376.01;PaF106G0500020001.01;PaF106G0100006744.01;PaF106G0700027334.01;PaF106G0400017820.01
GO:2000026	regulation of multicellular organismal development	50	-0.360725	-1.11164	0.316916	0.983888	5904	PaF106G0100005404.01;PaF106G0100004361.01;PaF106G0800032714.01;PaF106G0100005714.01;PaF106G0100001000.01;PaF106G0800030127.01;PaF106G0200009155.01;PaF106G0800029865.01;PaF106G0600023689.01;PaF106G0300013267.01;PaF106G0100004621.01;PaF106G0400015551.01;PaF106G0200009547.01;PaF106G0100001998.01;PaF106G0600024924.01;PaF106G0400015550.01;PaF106G0100001994.01;PaF106G0100000013.01
GO:0009725	response to hormone	104	0.316338	1.08856	0.320076	0.983888	1123	PaF106G0800030462.01;PaF106G0100001269.01;PaF106G0400016036.01;PaF106G0100004288.01;PaF106G0100001268.01;PaF106G0100003928.01;PaF106G0300011189.01;PaF106G0800029443.01;PaF106G0100006001.01;PaF106G0100005931.01
GO:0045927	positive regulation of growth	14	0.494682	1.1258	0.320565	0.983888	4270	PaF106G0100004293.01;PaF106G0800029430.01;PaF106G0600025373.01;PaF106G0100002756.01;PaF106G0600021767.01
GO:0003333	amino acid transmembrane transport	25	0.422607	1.10386	0.326923	0.983888	3526	PaF106G0100005692.01;PaF106G0100005690.01;PaF106G0100005695.01;PaF106G0100004197.01;PaF106G0100006299.01;PaF106G0100006254.01;PaF106G0100005188.01;PaF106G0600024754.01;PaF106G0400014781.01;PaF106G0100001416.01;PaF106G0800030399.01;PaF106G0500019862.01
GO:0031399	regulation of protein modification process	17	-0.452047	-1.11682	0.327236	0.983888	5862	PaF106G0100001000.01;PaF106G0300012078.01;PaF106G0600024910.01;PaF106G0300011084.01;PaF106G0100006133.01;PaF106G0800032140.01;PaF106G0400015551.01;PaF106G0400015550.01
GO:0019252	starch biosynthetic process	13	0.503618	1.1313	0.328767	0.983888	5863	PaF106G0500020071.01;PaF106G0300011438.01;PaF106G0100001785.01;PaF106G0800031465.01;PaF106G0700028111.01
GO:0016310	phosphorylation	30	-0.401351	-1.10369	0.329114	0.983888	2808	PaF106G0800029863.01;PaF106G0800031267.01;PaF106G0800030287.01;PaF106G0500020831.01;PaF106G0100004949.01;PaF106G0100000013.01
GO:0018205	peptidyl-lysine modification	17	-0.451479	-1.11541	0.329268	0.983888	717	PaF106G0100000133.01;PaF106G0100001994.01;PaF106G0100000111.01
GO:0034470	ncRNA processing	21	-0.425432	-1.09959	0.329317	0.983888	3133	PaF106G0500020688.01;PaF106G0400018443.01;PaF106G0600024953.01;PaF106G0800032136.01
GO:0006414	translational elongation	10	-0.519384	-1.11807	0.331276	0.983888	7225	PaF106G0200010761.01;PaF106G0700027764.01;PaF106G0400016616.01;PaF106G0400016617.01;PaF106G0600022515.01;PaF106G0600022519.01;PaF106G0100000142.01
GO:0045088	regulation of innate immune response	12	-0.500318	-1.13006	0.331301	0.983888	3333	PaF106G0200007263.01;PaF106G0300012679.01;PaF106G0300013611.01
GO:0000723	telomere maintenance	19	0.450115	1.1093	0.332681	0.983888	927	PaF106G0100005274.01;PaF106G0300013971.01;PaF106G0800032611.01
GO:0006383	transcription from RNA polymerase III promoter	10	0.530412	1.13429	0.337209	0.983888	5843	PaF106G0100006721.01;PaF106G0400015246.01;PaF106G0700026730.01;PaF106G0500019270.01;PaF106G0100006665.01;PaF106G0800031760.01;PaF106G0400015993.01
GO:0006081	cellular aldehyde metabolic process	15	-0.470798	-1.12298	0.337972	0.983888	1521	PaF106G0200009220.01;PaF106G0300014353.01;PaF106G0400014752.01;PaF106G0700027166.01;PaF106G0400014746.01;PaF106G0500018541.01;PaF106G0500018649.01;PaF106G0600024640.01
GO:0032787	monocarboxylic acid metabolic process	14	-0.479376	-1.12204	0.341897	0.983888	1024	PaF106G0200009482.01;PaF106G0600024640.01
GO:1901615	organic hydroxy compound metabolic process	14	-0.476419	-1.11512	0.34585	0.983888	1024	PaF106G0200009482.01;PaF106G0600024640.01
GO:2000022	regulation of jasmonic acid mediated signaling pathway	16	0.472249	1.10819	0.345924	0.983888	3651	PaF106G0400014796.01;PaF106G0300014171.01;PaF106G0100002672.01;PaF106G0300012465.01;PaF106G0400017027.01;PaF106G0400017348.01
GO:0005987	sucrose catabolic process	10	-0.515245	-1.10916	0.349794	0.983888	3840	PaF106G0100005082.01;PaF106G0600024285.01;PaF106G0600024636.01
GO:0009755	hormone-mediated signaling pathway	48	0.353228	1.06544	0.350187	0.983888	2880	PaF106G0100001269.01;PaF106G0400016036.01;PaF106G0100001268.01;PaF106G0700026513.01;PaF106G0100005931.01;PaF106G0200008722.01;PaF106G0100000914.01;PaF106G0100004281.01;PaF106G0400018100.01;PaF106G0100001274.01;PaF106G0700026516.01;PaF106G0200010378.01
GO:0009742	brassinosteroid mediated signaling pathway	18	-0.437574	-1.08979	0.35041	0.983888	1457	PaF106G0400016366.01;PaF106G0500018981.01;PaF106G0600024829.01
GO:0006338	chromatin remodeling	17	0.456299	1.09205	0.35098	0.983888	162	Prunus_sibirica_newGene_2274
GO:0006796	phosphate-containing compound metabolic process	39	-0.370555	-1.07335	0.351738	0.983888	3058	PaF106G0800029856.01;PaF106G0800029863.01;PaF106G0800031267.01;PaF106G0800030287.01;PaF106G0500020831.01;Prunus_sibirica_newGene_1959;PaF106G0100004949.01;PaF106G0100000013.01
GO:0007015	actin filament organization	17	-0.439147	-1.08495	0.353659	0.983888	115	PaF106G0700028849.01;PaF106G0800030039.01;PaF106G0200006790.01
GO:0010256	endomembrane system organization	17	0.453587	1.08556	0.362745	0.983888	7076	PaF106G0200010593.01;PaF106G0200008021.01;PaF106G0400015823.01;PaF106G0800029530.01;PaF106G0300011436.01;PaF106G0500018683.01;PaF106G0100003810.01;PaF106G0100005760.01;PaF106G0700026831.01
GO:1901617	organic hydroxy compound biosynthetic process	11	-0.496634	-1.08865	0.362887	0.983888	1024	PaF106G0200009482.01;PaF106G0600024640.01
GO:0010026	trichome differentiation	12	-0.48315	-1.09129	0.363821	0.983888	2563	PaF106G0600021578.01;PaF106G0300013611.01
GO:0072330	monocarboxylic acid biosynthetic process	11	-0.495729	-1.08666	0.364948	0.983888	1024	PaF106G0200009482.01;PaF106G0600024640.01
GO:0009642	response to light intensity	13	0.486605	1.09309	0.367906	0.983888	5828	PaF106G0700027967.01;PaF106G0600021406.01;PaF106G0300013648.01;PaF106G0100000029.01;PaF106G0700027096.01;Prunus_sibirica_newGene_1999;PaF106G0500018683.01
GO:0006352	DNA-templated transcription, initiation	21	0.42587	1.07133	0.369048	0.983888	1285	Prunus_sibirica_newGene_167;PaF106G0500021277.01
GO:1903046	meiotic cell cycle process	12	-0.480489	-1.08527	0.373984	0.983888	850	PaF106G0600024234.01;PaF106G0100002999.01;PaF106G0400017245.01
GO:0042542	response to hydrogen peroxide	12	-0.478296	-1.08032	0.376016	0.983888	1620	PaF106G0600022140.01;PaF106G0800032376.01;PaF106G0400018159.01
GO:0009415	response to water	27	0.406237	1.0728	0.376448	0.983888	2437	PaF106G0100003928.01;PaF106G0300011189.01;PaF106G0700027198.01;PaF106G0500019963.01;PaF106G0700027199.01;PaF106G0500020161.01
GO:0048285	organelle fission	28	-0.389729	-1.04989	0.377871	0.983888	850	PaF106G0800029757.01;PaF106G0100002106.01;PaF106G0500019922.01;PaF106G0400015576.01;PaF106G0500019924.01;PaF106G0100004031.01;PaF106G0100002999.01;PaF106G0200007275.01;PaF106G0400017245.01;PaF106G0200007276.01
GO:1903047	mitotic cell cycle process	15	0.461979	1.06902	0.378758	0.983888	234	PaF106G0200010593.01
GO:0000281	mitotic cytokinesis	11	0.501481	1.0956	0.37911	0.983888	234	PaF106G0200010593.01
GO:0000910	cytokinesis	11	0.501481	1.0956	0.37911	0.983888	234	PaF106G0200010593.01
GO:0061640	cytoskeleton-dependent cytokinesis	11	0.501481	1.0956	0.37911	0.983888	234	PaF106G0200010593.01
GO:0009739	response to gibberellin	12	-0.476384	-1.076	0.380081	0.983888	1778	PaF106G0300011287.01
GO:0034654	nucleobase-containing compound biosynthetic process	19	0.433563	1.06851	0.381605	0.983888	1103	Prunus_sibirica_newGene_167;PaF106G0100000058.01
GO:0051085	chaperone mediated protein folding requiring cofactor	28	-0.388381	-1.04626	0.388309	0.983888	783	PaF106G0300012782.01;PaF106G0200009780.01;PaF106G0100001661.01;PaF106G0500021248.01;PaF106G0200009783.01;PaF106G0700027847.01;PaF106G0100003868.01;PaF106G0200009790.01;PaF106G0700026793.01;PaF106G0700027849.01;PaF106G0700027837.01;PaF106G0700027850.01
GO:0000272	polysaccharide catabolic process	10	-0.499749	-1.0758	0.388889	0.983888	3577	PaF106G0400015330.01;PaF106G0500019089.01;PaF106G0300011965.01
GO:0051239	regulation of multicellular organismal process	52	-0.3318	-1.03237	0.389831	0.983888	5904	PaF106G0100005404.01;PaF106G0100004361.01;PaF106G0800032714.01;PaF106G0100005714.01;PaF106G0100001000.01;PaF106G0800030127.01;PaF106G0200009155.01;PaF106G0800029865.01;PaF106G0600023689.01;PaF106G0300013267.01;PaF106G0100004621.01;PaF106G0400015551.01;PaF106G0200009547.01;PaF106G0100001998.01;PaF106G0600024924.01;PaF106G0400015550.01;PaF106G0100001994.01;PaF106G0100000013.01
GO:2000028	regulation of photoperiodism, flowering	12	-0.470004	-1.06159	0.392276	0.983888	5248	PaF106G0100004881.01;PaF106G0100005714.01;PaF106G0100001000.01;PaF106G0300013996.01;PaF106G0200009155.01;PaF106G0700027133.01;PaF106G0600023689.01;PaF106G0100004621.01
GO:0045786	negative regulation of cell cycle	13	-0.465644	-1.07473	0.393075	0.983888	2691	PaF106G0100004361.01;PaF106G0600022314.01;PaF106G0800029863.01;PaF106G0800030287.01;PaF106G0300011178.01;PaF106G0600022756.01
GO:0010150	leaf senescence	17	-0.425735	-1.05181	0.394309	0.983888	1383	PaF106G0100006456.01;PaF106G0300012225.01
GO:0009909	regulation of flower development	27	-0.390704	-1.04366	0.396694	0.983888	2905	PaF106G0800030127.01;PaF106G0700027133.01;PaF106G0400015551.01;PaF106G0100002652.01;PaF106G0100001998.01;PaF106G0400015550.01;PaF106G0100001994.01;PaF106G0100000013.01
GO:0016042	lipid catabolic process	28	0.395113	1.05556	0.405354	0.983888	3940	PaF106G0300014027.01;PaF106G0700027494.01;PaF106G0100000775.01;PaF106G0300011036.01;PaF106G0300014161.01;PaF106G0200009522.01;PaF106G0700028566.01;PaF106G0300012108.01;PaF106G0600022044.01;PaF106G0800030951.01
GO:0042744	hydrogen peroxide catabolic process	38	-0.356992	-1.03105	0.40568	0.983888	2485	PaF106G0100000964.01;PaF106G0300011300.01;PaF106G0700029061.01;PaF106G0600021893.01;PaF106G0100001360.01;PaF106G0400018141.01;PaF106G0700028161.01;PaF106G0200010082.01;PaF106G0600024407.01;PaF106G0700027064.01
GO:0002831	regulation of response to biotic stimulus	13	-0.460279	-1.06235	0.411405	0.983888	1809	PaF106G0300012679.01;PaF106G0200009482.01;PaF106G0300013611.01
GO:0005976	polysaccharide metabolic process	10	-0.489417	-1.05356	0.415638	0.983888	5904	PaF106G0100000065.01;PaF106G0700029251.01;PaF106G0100005714.01;PaF106G0800030127.01;PaF106G0600023689.01;PaF106G0100005082.01
GO:0046686	response to cadmium ion	36	-0.362335	-1.03959	0.415984	0.983888	6712	PaF106G0200009351.01;PaF106G0600021384.01;PaF106G0400015310.01;PaF106G0100005667.01;PaF106G0600022850.01;PaF106G0100006152.01;PaF106G0600025427.01;PaF106G0200009629.01;PaF106G0400015716.01;PaF106G0600022526.01;PaF106G0100004529.01;PaF106G0100004463.01;PaF106G0400016291.01;PaF106G0600022303.01;PaF106G0600022140.01
GO:0031936	negative regulation of chromatin silencing	12	-0.459873	-1.03871	0.418699	0.983888	5152	PaF106G0700027141.01;PaF106G0100003863.01;PaF106G0300013719.01;PaF106G0500021213.01;PaF106G0300012697.01
GO:0048831	regulation of shoot system development	26	-0.391832	-1.03006	0.419624	0.983888	2905	PaF106G0100001998.01;PaF106G0400015550.01;PaF106G0100001994.01;PaF106G0100000013.01
GO:0051716	cellular response to stimulus	137	0.28398	1.01862	0.421154	0.983888	1263	PaF106G0800030462.01;PaF106G0100001269.01;PaF106G0400016036.01;PaF106G0800030114.01;PaF106G0100001268.01;PaF106G0400018009.01;PaF106G0600024841.01;PaF106G0700028154.01;PaF106G0400016573.01;PaF106G0100005931.01;PaF106G0300010980.01
GO:0060548	negative regulation of cell death	15	-0.443609	-1.05813	0.423459	0.983888	3079	PaF106G0100005714.01;PaF106G0600023689.01;PaF106G0100004621.01;PaF106G0200007263.01;PaF106G0500020162.01;PaF106G0100000264.01;PaF106G0600025495.01
GO:0034660	ncRNA metabolic process	24	-0.393037	-1.02924	0.423625	0.983888	3133	PaF106G0500020688.01;PaF106G0400018443.01;PaF106G0600024953.01;PaF106G0800032136.01
GO:0006879	cellular iron ion homeostasis	10	0.481967	1.03069	0.424419	0.983888	1365	PaF106G0400017850.01;PaF106G0400016733.01
GO:0006310	DNA recombination	41	0.347172	1.01427	0.426104	0.983888	927	PaF106G0100005274.01;PaF106G0300013971.01;PaF106G0100001278.01;PaF106G0600025380.01;PaF106G0800032611.01
GO:0010027	thylakoid membrane organization	13	-0.453433	-1.04655	0.427699	0.983888	5257	PaF106G0100004192.01;PaF106G0300012966.01;PaF106G0100002915.01;PaF106G0300010959.01;PaF106G0100003797.01;PaF106G0800029659.01;PaF106G0600022779.01;PaF106G0300013334.01;PaF106G0600022329.01
GO:0016053	organic acid biosynthetic process	13	-0.453396	-1.04646	0.427699	0.983888	1024	PaF106G0400015716.01;PaF106G0800030702.01;PaF106G0400015745.01;PaF106G0500018541.01;PaF106G0200009482.01;PaF106G0600024640.01
GO:0046394	carboxylic acid biosynthetic process	13	-0.453396	-1.04646	0.427699	0.983888	1024	PaF106G0400015716.01;PaF106G0800030702.01;PaF106G0400015745.01;PaF106G0500018541.01;PaF106G0200009482.01;PaF106G0600024640.01
GO:0032101	regulation of response to external stimulus	14	-0.449265	-1.05156	0.428854	0.983888	1809	PaF106G0300012679.01;PaF106G0200009482.01;PaF106G0300013611.01
GO:0043900	regulation of multi-organism process	14	-0.449265	-1.05156	0.428854	0.983888	1809	PaF106G0300012679.01;PaF106G0200009482.01;PaF106G0300013611.01
GO:1901135	carbohydrate derivative metabolic process	17	-0.413177	-1.02079	0.428862	0.983888	220	PaF106G0100006364.01;PaF106G0500019373.01;PaF106G0100002966.01;PaF106G0400015310.01;PaF106G0600025831.01;PaF106G0500020147.01;PaF106G0800029901.01;Prunus_sibirica_newGene_1840;PaF106G0300012225.01
GO:0008283	cell proliferation	10	-0.482598	-1.03888	0.430041	0.983888	689	PaF106G0600025658.01;PaF106G0100004918.01
GO:0045292	mRNA cis splicing, via spliceosome	15	-0.436193	-1.04044	0.4334	0.983888	6545	PaF106G0400015128.01;PaF106G0800031225.01;PaF106G0400016917.01;PaF106G0100005950.01;PaF106G0100005319.01;PaF106G0600021466.01;PaF106G0200009815.01;PaF106G0700027682.01;PaF106G0100003088.01
GO:0006298	mismatch repair	14	-0.439419	-1.02852	0.438735	0.983888	5104	PaF106G0100000600.01;PaF106G0800029288.01;PaF106G0800029424.01;PaF106G0700026399.01;PaF106G0600022113.01
GO:0009768	photosynthesis, light harvesting in photosystem I	11	-0.464623	-1.01848	0.439175	0.983888	7065	PaF106G0800030884.01;PaF106G0300012505.01;PaF106G0400015937.01;PaF106G0200009956.01;PaF106G0500018484.01;PaF106G0400017422.01
GO:0048437	floral organ development	19	-0.404629	-1.0151	0.439919	0.983888	200	PaF106G0100004361.01;PaF106G0800032714.01;PaF106G0200006947.01;PaF106G0400017298.01;PaF106G0600023689.01;Prunus_sibirica_newGene_1788
GO:0061024	membrane organization	18	0.422022	1.02364	0.441634	0.983888	1824	PaF106G0200010593.01;PaF106G0800031477.01
GO:0006464	cellular protein modification process	117	-0.286175	-1.01109	0.445135	0.983888	3079	PaF106G0400015745.01;PaF106G0800029856.01;PaF106G0800029863.01;PaF106G0600025339.01;PaF106G0100005813.01;PaF106G0100001998.01;PaF106G0600025385.01;PaF106G0800031267.01;PaF106G0500019462.01;PaF106G0800030287.01;PaF106G0500020831.01;Prunus_sibirica_newGene_1959;PaF106G0700026755.01;PaF106G0300011178.01;PaF106G0100000133.01;PaF106G0600024829.01;PaF106G0100001994.01;PaF106G0500018649.01;PaF106G010000…
GO:0042742	defense response to bacterium	72	0.309202	1.0013	0.44592	0.983888	3318	PaF106G0800030462.01;PaF106G0400016036.01;PaF106G0300013544.01;PaF106G0400017421.01;PaF106G0300013492.01;PaF106G0400018030.01;PaF106G0600022458.01;PaF106G0500020463.01;PaF106G0100001867.01;PaF106G0600023814.01;PaF106G0100005474.01;PaF106G0100003926.01;PaF106G0300012465.01;PaF106G0600021657.01;PaF106G0400017027.01
GO:0006351	transcription, DNA-templated	86	-0.298881	-1.00388	0.448637	0.983888	4060	PaF106G0200007342.01;PaF106G0600024579.01;PaF106G0200007305.01;PaF106G0500018727.01;PaF106G0200007420.01;PaF106G0600023167.01;PaF106G0100006651.01;PaF106G0300011684.01;PaF106G0600021675.01;PaF106G0300014098.01;PaF106G0200010878.01;PaF106G0300013145.01;PaF106G0700028337.01;PaF106G0500020950.01;PaF106G0400016366.01;PaF106G0700027756.01;PaF106G0700026733.01;PaF106G0300014130.01;PaF106G0700029076.01;…
GO:0045893	positive regulation of transcription, DNA-templated	83	0.301839	1.00283	0.451613	0.983888	4401	Prunus_sibirica_newGene_167;PaF106G0600022022.01;PaF106G0300011255.01;PaF106G0600024149.01;PaF106G0500021297.01;PaF106G0300010980.01;PaF106G0100003254.01;PaF106G0400017709.01;PaF106G0200008722.01;PaF106G0600022966.01;PaF106G0700027317.01;PaF106G0100006493.01;PaF106G0500020061.01;PaF106G0400014993.01;PaF106G0400018327.01;PaF106G0100001870.01;PaF106G0600024570.01;PaF106G0300011404.01;PaF106G0300013…
GO:0048589	developmental growth	25	0.381277	0.995901	0.451923	0.983888	5049	PaF106G0600024841.01;PaF106G0800031242.01;PaF106G0800029430.01;PaF106G0300011240.01;PaF106G0400018179.01;PaF106G0100003400.01;PaF106G0200008575.01;PaF106G0800029477.01;PaF106G0100000510.01;PaF106G0800031792.01;PaF106G0500020982.01
GO:0001522	pseudouridine synthesis	19	-0.399264	-1.00164	0.452138	0.983888	3713	PaF106G0400018170.01;PaF106G0600021899.01;PaF106G0100006686.01;PaF106G0600025294.01
GO:0071586	CAAX-box protein processing	10	-0.474037	-1.02045	0.452675	0.983888	176	PaF106G0100002905.01;PaF106G0300011157.01
GO:0006508	proteolysis	109	0.289269	1.00017	0.455238	0.983888	3765	PaF106G0100001269.01;PaF106G0300011024.01;PaF106G0800032199.01;PaF106G0100001268.01;PaF106G0100001769.01;PaF106G0600021737.01;PaF106G0100005656.01;PaF106G0800029637.01;PaF106G0100003787.01;PaF106G0100001274.01;PaF106G0300011567.01;PaF106G0600025367.01;PaF106G0200009042.01;PaF106G0200007188.01;PaF106G0300012465.01;PaF106G0100004180.01;PaF106G0100005311.01;PaF106G0400017027.01;PaF106G0100001870.01;…
GO:0009082	branched-chain amino acid biosynthetic process	11	0.460708	1.00653	0.45648	0.983888	1429	PaF106G0100004891.01;PaF106G0800030728.01;PaF106G0800030723.01
GO:0048229	gametophyte development	29	-0.367016	-1.00035	0.456842	0.983888	4840	PaF106G0600023689.01;PaF106G0800032140.01;PaF106G0600024234.01;PaF106G0800029863.01;PaF106G0800030173.01;PaF106G0800030287.01;PaF106G0200010599.01;PaF106G0400017245.01
GO:0006749	glutathione metabolic process	22	-0.386045	-0.993585	0.461382	0.983888	3322	PaF106G0300012483.01;PaF106G0100003185.01;PaF106G0200008132.01;PaF106G0400016496.01;PaF106G0100000658.01;PaF106G0400016502.01
GO:0048731	system development	107	-0.285887	-0.996453	0.461538	0.983888	4967	PaF106G0400017298.01;PaF106G0800029757.01;PaF106G0200010457.01;PaF106G0800030127.01;PaF106G0200009155.01;PaF106G0100006270.01;PaF106G0600023689.01;PaF106G0300013267.01;PaF106G0100003918.01;PaF106G0100000005.01;PaF106G0300011048.01;PaF106G0500021073.01;PaF106G0100003185.01;PaF106G0700026051.01;PaF106G0400015551.01;PaF106G0800029856.01;PaF106G0600023607.01;PaF106G0100001840.01;PaF106G0100001998.01;…
GO:0044255	cellular lipid metabolic process	14	-0.430333	-1.00725	0.462451	0.983888	4457	PaF106G0400015745.01;PaF106G0100005164.01;PaF106G0100004949.01
GO:0010499	proteasomal ubiquitin-independent protein catabolic process	11	-0.459247	-1.00669	0.463918	0.983888	8603	PaF106G0700027094.01;PaF106G0200008715.01;PaF106G0100006512.01;PaF106G0400016897.01;PaF106G0100005711.01;PaF106G0100004456.01;PaF106G0300014162.01;PaF106G0400016649.01;PaF106G0100000230.01
GO:0006974	cellular response to DNA damage stimulus	36	-0.346892	-0.995278	0.469262	0.983888	6268	PaF106G0700027031.01;PaF106G0100004361.01;PaF106G0800032714.01;PaF106G0400015609.01;PaF106G0100002106.01;PaF106G0700027028.01;PaF106G0800030127.01;PaF106G0300013586.01;PaF106G0100004060.01;PaF106G0500020545.01;PaF106G0200010116.01;PaF106G0500020851.01;PaF106G0400017694.01;PaF106G0300011178.01;PaF106G0700027029.01
GO:0006873	cellular ion homeostasis	10	-0.468181	-1.00785	0.471193	0.983888	2222	PaF106G0200009236.01;PaF106G0300012269.01;PaF106G0300012271.01
GO:0016192	vesicle-mediated transport	91	0.296979	0.99952	0.471845	0.983888	7648	PaF106G0800031890.01;PaF106G0800031767.01;PaF106G0600024282.01;PaF106G0600021787.01;PaF106G0800031477.01;PaF106G0300012943.01;PaF106G0600023965.01;PaF106G0200008021.01;PaF106G0100005591.01;PaF106G0400015823.01;PaF106G0100000038.01;PaF106G0100002144.01;PaF106G0800029530.01;PaF106G0300012192.01;PaF106G0600022021.01;PaF106G0500019430.01;PaF106G0300014184.01;PaF106G0200009864.01;PaF106G0100000315.01;…
GO:0050896	response to stimulus	315	-0.249709	-0.993903	0.474227	0.983888	3336	PaF106G0700026675.01;PaF106G0100003185.01;PaF106G0400017346.01;PaF106G0100005405.01;PaF106G0100005769.01;PaF106G0100004621.01;PaF106G0400015745.01;PaF106G0400014772.01;PaF106G0400015551.01;PaF106G0600024594.01;PaF106G0800029856.01;PaF106G0100004232.01;PaF106G0400018079.01;PaF106G0400018285.01;Prunus_sibirica_newGene_1608;PaF106G0400016260.01;PaF106G0200007263.01;PaF106G0100004463.01;PaF106G010000…
GO:0010817	regulation of hormone levels	19	0.403605	0.994679	0.483366	0.983888	1235	PaF106G0400016036.01;PaF106G0100002938.01
GO:0042981	regulation of apoptotic process	10	-0.464202	-0.999281	0.483539	0.983888	6632	PaF106G0100004375.01;PaF106G0800029283.01;PaF106G0100005714.01;PaF106G0600023689.01;PaF106G0100004621.01;PaF106G0300012530.01
GO:1905392	plant organ morphogenesis	21	-0.375693	-0.971037	0.487952	0.983888	1968	PaF106G0400017298.01;PaF106G0200010457.01;PaF106G0100000005.01;PaF106G0500020831.01;PaF106G0600024737.01;Prunus_sibirica_newGene_1788
GO:0051259	protein oligomerization	12	0.44845	0.988527	0.488235	0.983888	2186	PaF106G0200010593.01;PaF106G0800032923.01;PaF106G0800032934.01
GO:0009651	response to salt stress	67	-0.305143	-0.984672	0.488273	0.983888	2595	PaF106G0600022526.01;PaF106G0100003185.01;PaF106G0300011215.01;PaF106G0400016260.01;PaF106G0100001998.01;PaF106G0300012679.01;PaF106G0600022105.01;PaF106G0200008710.01;PaF106G0400018159.01;PaF106G0400016240.01;PaF106G0100001994.01;PaF106G0300011287.01;PaF106G0600021580.01
GO:0009894	regulation of catabolic process	18	0.404339	0.980743	0.494163	0.983888	2033	PaF106G0200006908.01;Prunus_sibirica_newGene_1207;PaF106G0800030376.01;PaF106G0300012207.01;PaF106G0800029541.01
GO:0031329	regulation of cellular catabolic process	18	0.404339	0.980743	0.494163	0.983888	2033	PaF106G0200006908.01;Prunus_sibirica_newGene_1207;PaF106G0800030376.01;PaF106G0300012207.01;PaF106G0800029541.01
GO:0006826	iron ion transport	21	-0.373359	-0.965004	0.497992	0.983888	2698	PaF106G0800031428.01;PaF106G0600024939.01;PaF106G0800032256.01;PaF106G0800032257.01
GO:0006970	response to osmotic stress	49	-0.314867	-0.962788	0.498929	0.983888	3858	PaF106G0600022526.01;PaF106G0100003185.01;PaF106G0400016260.01;PaF106G0100001998.01;PaF106G0500019321.01;PaF106G0300012679.01;PaF106G0200008710.01;PaF106G0400016240.01;PaF106G0100001994.01;PaF106G0300011287.01
GO:0007010	cytoskeleton organization	24	0.37699	0.972077	0.499022	0.983888	4797	PaF106G0200010593.01;PaF106G0600024398.01;PaF106G0800031477.01;PaF106G0800031418.01;PaF106G0400015823.01;PaF106G0200009619.01;PaF106G0100000962.01;PaF106G0200007329.01
GO:0050801	ion homeostasis	11	-0.449719	-0.985808	0.503093	0.983888	2222	PaF106G0300011048.01;PaF106G0200009186.01;PaF106G0200009236.01;PaF106G0300012269.01;PaF106G0300012271.01
GO:0051260	protein homooligomerization	12	0.44269	0.975829	0.503922	0.983888	234	PaF106G0200010593.01
GO:0044282	small molecule catabolic process	11	-0.447716	-0.981415	0.505155	0.983888	1024	PaF106G0600024640.01
GO:0046323	glucose import	22	-0.373043	-0.960122	0.506098	0.983888	747	PaF106G0400018350.01;PaF106G0100001674.01
GO:0010228	vegetative to reproductive phase transition of meristem	18	-0.385252	-0.959479	0.506148	0.983888	6717	PaF106G0200009351.01;PaF106G0500019240.01;PaF106G0200009155.01;PaF106G0400015551.01;PaF106G0400015550.01;PaF106G0200010461.01
GO:0016554	cytidine to uridine editing	10	-0.450152	-0.969035	0.512346	0.983888	5471	PaF106G0800030541.01;PaF106G0400015882.01;PaF106G0100000552.01;PaF106G0100001936.01;PaF106G0300014155.01
GO:1903311	regulation of mRNA metabolic process	15	0.419694	0.971173	0.513026	0.983888	2033	PaF106G0200006908.01;Prunus_sibirica_newGene_1207;PaF106G0800030376.01;PaF106G0300012207.01;PaF106G0800029541.01
GO:0006811	ion transport	13	-0.416134	-0.960462	0.517312	0.983888	1934	PaF106G0300012269.01;PaF106G0300012271.01
GO:0098754	detoxification	13	0.432043	0.970522	0.518591	0.983888	1857	PaF106G0400018009.01;PaF106G0700028154.01;PaF106G0500018620.01
GO:0032259	methylation	130	-0.27337	-0.96671	0.522105	0.983888	1873	PaF106G0100003697.01;PaF106G0100003018.01;PaF106G0600024801.01;PaF106G0500021364.01;PaF106G0600021547.01;PaF106G0300013490.01;PaF106G0800030524.01;PaF106G0200010776.01;PaF106G0800030531.01;PaF106G0200008384.01;PaF106G0800030529.01;PaF106G0500021185.01;PaF106G0100001994.01;PaF106G0800030528.01;PaF106G0200009345.01;PaF106G0700026579.01;PaF106G0300013244.01;PaF106G0300013106.01;PaF106G0300013243.01
GO:0019637	organophosphate metabolic process	15	-0.401634	-0.958008	0.524851	0.983888	7340	PaF106G0100006364.01;PaF106G0500019373.01;PaF106G0100000544.01;PaF106G0400015310.01;PaF106G0500020147.01;PaF106G0100002106.01;PaF106G0400015745.01;PaF106G0100004949.01
GO:0051052	regulation of DNA metabolic process	13	-0.412863	-0.952912	0.525458	0.983888	5852	PaF106G0500020127.01;PaF106G0100003227.01;PaF106G0100004361.01;PaF106G0600023304.01;PaF106G0400017939.01;PaF106G0400015551.01;PaF106G0800029665.01;PaF106G0400015550.01
GO:0051493	regulation of cytoskeleton organization	11	-0.439651	-0.963737	0.525773	0.983888	931	PaF106G0100002765.01;PaF106G0200010599.01
GO:0019722	calcium-mediated signaling	12	0.43565	0.96031	0.533333	0.983888	4382	PaF106G0100001933.01;PaF106G0600025374.01;PaF106G0400017772.01;PaF106G0100001587.01;PaF106G0700028934.01;PaF106G0600021764.01;PaF106G0800029530.01
GO:0045944	positive regulation of transcription from RNA polymerase II promoter	68	0.297214	0.952309	0.535104	0.983888	4184	Prunus_sibirica_newGene_167;PaF106G0200008233.01;PaF106G0300011662.01;PaF106G0100006114.01;PaF106G0200008781.01;PaF106G0100003460.01;PaF106G0300010991.01;PaF106G0100005891.01;PaF106G0100000869.01;PaF106G0100006319.01;PaF106G0600024523.01;PaF106G0200008783.01;PaF106G0200010418.01;PaF106G0500019537.01;PaF106G0100003314.01;PaF106G0700027165.01;PaF106G0200007066.01;PaF106G0100001870.01;PaF106G0400015…
GO:1900864	mitochondrial RNA modification	16	0.405712	0.952053	0.538767	0.983888	1509	PaF106G0600022481.01;PaF106G0200008241.01
GO:0033365	protein localization to organelle	18	-0.380481	-0.947595	0.538934	0.983888	1041	PaF106G0800029283.01;PaF106G0100005714.01;PaF106G0600023689.01;PaF106G0100000865.01;PaF106G0100005229.01
GO:0005985	sucrose metabolic process	12	0.432323	0.952977	0.539216	0.983888	3056	PaF106G0800031731.01;PaF106G0800032891.01;PaF106G0100005596.01;PaF106G0100001858.01
GO:0002181	cytoplasmic translation	23	0.370744	0.952631	0.541267	0.983888	1060	PaF106G0100005893.01;PaF106G0700028670.01
GO:0042274	ribosomal small subunit biogenesis	13	-0.40616	-0.93744	0.545825	0.983888	6574	PaF106G0700027642.01;PaF106G0400014991.01;PaF106G0100006633.01;PaF106G0800032680.01;PaF106G0800029759.01;PaF106G0100004372.01;PaF106G0100003447.01
GO:0051254	positive regulation of RNA metabolic process	42	0.322123	0.945479	0.549323	0.983888	2033	Prunus_sibirica_newGene_167;PaF106G0200006908.01;PaF106G0500021297.01;PaF106G0300010980.01;PaF106G0800030376.01;PaF106G0800029541.01
GO:0010941	regulation of cell death	19	0.383027	0.943966	0.549902	0.983888	3518	PaF106G0400016036.01;PaF106G0500020161.01;PaF106G0100005474.01;PaF106G0100001870.01
GO:0048364	root development	43	-0.320977	-0.946271	0.550515	0.983888	5296	PaF106G0300012405.01;PaF106G0100001845.01;PaF106G0200008729.01;PaF106G0200010457.01;PaF106G0100000005.01;PaF106G0500021073.01;PaF106G0100003185.01;PaF106G0800029856.01;PaF106G0500020831.01;PaF106G0500018715.01;PaF106G0300013569.01;PaF106G0100005141.01
GO:0060560	developmental growth involved in morphogenesis	19	0.381272	0.939642	0.553816	0.983888	5049	PaF106G0600024841.01;PaF106G0800031242.01;PaF106G0300011240.01;PaF106G0400018179.01;PaF106G0200008575.01;PaF106G0800029477.01;PaF106G0100000510.01;PaF106G0800031792.01;PaF106G0500020982.01
GO:0019220	regulation of phosphate metabolic process	12	-0.415469	-0.938415	0.554878	0.983888	6146	PaF106G0400018273.01;PaF106G0600024395.01;PaF106G0800029283.01;PaF106G0300012078.01;PaF106G0600024910.01;PaF106G0800032140.01;PaF106G0400014772.01
GO:0036297	interstrand cross-link repair	12	-0.415902	-0.939393	0.554878	0.983888	2828	PaF106G0100006362.01;PaF106G0700027611.01;PaF106G0300012293.01;PaF106G0600024108.01;PaF106G0700027616.01
GO:0051174	regulation of phosphorus metabolic process	12	-0.415469	-0.938415	0.554878	0.983888	6146	PaF106G0400018273.01;PaF106G0600024395.01;PaF106G0800029283.01;PaF106G0300012078.01;PaF106G0600024910.01;PaF106G0800032140.01;PaF106G0400014772.01
GO:0071554	cell wall organization or biogenesis	12	-0.415296	-0.938025	0.554878	0.983888	1804	PaF106G0600023689.01;PaF106G0600022026.01;PaF106G0500020912.01;PaF106G0300013190.01
GO:0036211	protein modification process	110	-0.273801	-0.955905	0.557173	0.983888	3079	PaF106G0400015745.01;PaF106G0800029856.01;PaF106G0800029863.01;PaF106G0600025339.01;PaF106G0100001998.01;PaF106G0600025385.01;PaF106G0800031267.01;PaF106G0500019462.01;PaF106G0800030287.01;PaF106G0500020831.01;Prunus_sibirica_newGene_1959;PaF106G0300011178.01;PaF106G0100000133.01;PaF106G0600024829.01;PaF106G0100001994.01;PaF106G0500018649.01;PaF106G0100000013.01;PaF106G0100000111.01
GO:0009640	photomorphogenesis	10	-0.433417	-0.933011	0.557613	0.983888	5612	PaF106G0200009155.01;PaF106G0100003185.01;PaF106G0400016394.01;PaF106G0600024230.01
GO:0015031	protein transport	108	0.278255	0.958142	0.557915	0.983888	3884	PaF106G0200010830.01;PaF106G0800031890.01;PaF106G0300013802.01;PaF106G0800031767.01;PaF106G0800029831.01;PaF106G0300011805.01;Prunus_sibirica_newGene_1434;PaF106G0100004276.01;PaF106G0600024435.01;PaF106G0300011833.01;PaF106G0600023965.01;PaF106G0600025386.01;PaF106G0800032231.01;PaF106G0100002696.01;PaF106G0200009684.01;PaF106G0100001416.01;PaF106G0400016345.01;PaF106G0800029864.01;PaF106G010000…
GO:0016071	mRNA metabolic process	40	0.321602	0.935163	0.557915	0.983888	1989	PaF106G0600022481.01;Prunus_sibirica_newGene_1207;PaF106G0200008241.01;PaF106G0300012207.01
GO:0009965	leaf morphogenesis	18	0.38091	0.923914	0.562257	0.983888	6743	PaF106G0300011255.01;PaF106G0700027485.01;PaF106G0400017292.01;PaF106G0600023806.01;PaF106G0300013171.01;PaF106G0300013150.01;Prunus_sibirica_newGene_1823;PaF106G0300012987.01;PaF106G0600021746.01;PaF106G0700027554.01
GO:0045935	positive regulation of nucleobase-containing compound metabolic process	43	0.31527	0.931401	0.562863	0.983888	2033	Prunus_sibirica_newGene_167;PaF106G0200006908.01;PaF106G0500021297.01;PaF106G0300010980.01;PaF106G0800030376.01;PaF106G0800029541.01
GO:0040008	regulation of growth	17	-0.377003	-0.931414	0.563008	0.983888	4523	PaF106G0100000165.01;PaF106G0800030127.01;PaF106G0100000393.01;PaF106G0800029422.01;PaF106G0600024924.01;PaF106G0100000013.01
GO:0042254	ribosome biogenesis	33	-0.334068	-0.943803	0.567901	0.983888	7445	PaF106G0100001480.01;PaF106G0600022617.01;PaF106G0300014206.01;PaF106G0400014817.01;PaF106G0200010240.01;PaF106G0400017330.01;PaF106G0700027642.01;PaF106G0400014991.01;PaF106G0100003291.01;PaF106G0100006633.01;PaF106G0300010977.01;PaF106G0100000165.01;PaF106G0400017011.01;PaF106G0800031892.01;PaF106G0500019035.01;PaF106G0600021536.01;PaF106G0800031586.01;PaF106G0800029759.01;PaF106G0400018443.01;…
GO:0009561	megagametogenesis	10	-0.425268	-0.915468	0.569959	0.983888	3956	PaF106G0100006651.01;PaF106G0400016714.01
GO:0071214	cellular response to abiotic stimulus	13	-0.397851	-0.918262	0.574338	0.983888	1397	Prunus_sibirica_newGene_1959;PaF106G0200008710.01
GO:0009636	response to toxic substance	24	0.358338	0.923984	0.577299	0.983888	1857	PaF106G0400018009.01;PaF106G0700028154.01;PaF106G0700027967.01;PaF106G0500018620.01
GO:0070475	rRNA base methylation	11	-0.420451	-0.921651	0.579381	0.983888	1784	PaF106G0400016700.01;PaF106G0400016692.01;PaF106G0400016709.01
GO:0009611	response to wounding	31	0.335234	0.91374	0.580769	0.983888	5384	PaF106G0300014171.01;PaF106G0100002672.01;PaF106G0300013492.01;PaF106G0400017937.01;PaF106G0100002573.01;PaF106G0400017348.01;PaF106G0500021231.01;PaF106G0500018539.01;PaF106G0300012678.01;PaF106G0100003300.01;PaF106G0400014843.01;PaF106G0700026787.01
GO:0010557	positive regulation of macromolecule biosynthetic process	39	0.320647	0.927688	0.580897	0.983888	1263	Prunus_sibirica_newGene_167;PaF106G0700027967.01;PaF106G0500021297.01;PaF106G0300010980.01
GO:0051301	cell division	58	-0.291598	-0.928408	0.58125	0.983888	5602	PaF106G0200008465.01;PaF106G0700026480.01;PaF106G0300011724.01;PaF106G0300011495.01;PaF106G0400015627.01;PaF106G0200010818.01;PaF106G0700027243.01;PaF106G0600023689.01;PaF106G0600022747.01;PaF106G0400015576.01;PaF106G0500020507.01;PaF106G0300011048.01;PaF106G0100003361.01;PaF106G0700027808.01;PaF106G0600021505.01;PaF106G0700026051.01;PaF106G0800030173.01;PaF106G0600025859.01;PaF106G0100001840.01;…
GO:0006869	lipid transport	43	0.311778	0.921086	0.582205	0.983888	2057	PaF106G0400015672.01;PaF106G0600025015.01;PaF106G0200006792.01;PaF106G0100004078.01;PaF106G0600024342.01;PaF106G0100006451.01;PaF106G0100000225.01;PaF106G0800031477.01;PaF106G0100005597.01;PaF106G0100005900.01
GO:0051726	regulation of cell cycle	26	-0.351849	-0.92495	0.582463	0.983888	3334	PaF106G0100001617.01;PaF106G0300014574.01;PaF106G0800029283.01;PaF106G0100004361.01;PaF106G0600024547.01;PaF106G0500020613.01;PaF106G0800029863.01;PaF106G0800030287.01;PaF106G0300011178.01;PaF106G0300011888.01
GO:0009411	response to UV	11	-0.417415	-0.914996	0.583505	0.983888	992	PaF106G0600022056.01;PaF106G0500021275.01;PaF106G0100004529.01;PaF106G0300011178.01;PaF106G0200010567.01
GO:0022607	cellular component assembly	57	0.298216	0.923743	0.58365	0.983888	699	Prunus_sibirica_newGene_167;PaF106G0200010593.01;PaF106G0300013257.01
GO:0045892	negative regulation of transcription, DNA-templated	48	0.306724	0.925173	0.58427	0.983888	5232	PaF106G0500019181.01;PaF106G0700027288.01;PaF106G0300013492.01;PaF106G0100001999.01;PaF106G0800030194.01;PaF106G0100000914.01;PaF106G0100000869.01;PaF106G0800032303.01;PaF106G0500020371.01;PaF106G0500018967.01;PaF106G0300013002.01;PaF106G0200010710.01;PaF106G0700028252.01;PaF106G0800029493.01;PaF106G0100002638.01;PaF106G0100003647.01;PaF106G0600024231.01;PaF106G0100005836.01
GO:0009408	response to heat	49	-0.300805	-0.91979	0.584582	0.983888	1642	PaF106G0500019321.01;PaF106G0500020912.01;Prunus_sibirica_newGene_1959;PaF106G0200008710.01;PaF106G0600022140.01;PaF106G0400018159.01;PaF106G0300014431.01;PaF106G0300012100.01;PaF106G0700027029.01
GO:0007017	microtubule-based process	40	0.316027	0.918953	0.584942	0.983888	4797	PaF106G0200010593.01;PaF106G0700026355.01;PaF106G0600024398.01;PaF106G0800031477.01;PaF106G0300013825.01;PaF106G0500021224.01;PaF106G0300011240.01;PaF106G0600021419.01;PaF106G0700029157.01;PaF106G0400017165.01;PaF106G0400015823.01;PaF106G0100001530.01;PaF106G0200009240.01;PaF106G0700029215.01;PaF106G0200009619.01;PaF106G0400015929.01;PaF106G0200007329.01
GO:0009073	aromatic amino acid family biosynthetic process	11	-0.414536	-0.908684	0.587629	0.983888	5765	PaF106G0100006007.01;PaF106G0500019129.01;PaF106G0300011402.01;PaF106G0200008684.01;PaF106G0600023849.01;PaF106G0200009523.01
GO:0000959	mitochondrial RNA metabolic process	19	-0.357433	-0.896702	0.588595	0.983888	3615	PaF106G0600022421.01;PaF106G0500020755.01;PaF106G0400016446.01;PaF106G0600022713.01;Prunus_sibirica_newGene_743;PaF106G0800032136.01
GO:0009790	embryo development	34	-0.328227	-0.925608	0.597917	0.983888	6167	PaF106G0100004361.01;PaF106G0800032714.01;PaF106G0100006732.01;PaF106G0200010668.01;PaF106G0300012405.01;PaF106G0800029757.01;PaF106G0100006270.01;PaF106G0100003918.01;PaF106G0500021073.01;PaF106G0700026051.01;PaF106G0600023607.01;PaF106G0100001840.01;PaF106G0600024526.01;PaF106G0600024737.01;PaF106G0200010599.01
GO:0035999	tetrahydrofolate interconversion	12	0.406786	0.896685	0.6	0.983888	1896	PaF106G0800029454.01;PaF106G0100005850.01
GO:0072583	clathrin-dependent endocytosis	16	0.381251	0.89465	0.602386	0.983888	3890	PaF106G0300012095.01;PaF106G0100000873.01;PaF106G0100004516.01;PaF106G0700027230.01
GO:0022603	regulation of anatomical structure morphogenesis	19	-0.353543	-0.886943	0.602851	0.983888	4523	PaF106G0100003540.01;PaF106G0800029283.01;PaF106G0800030127.01;PaF106G0800029865.01;PaF106G0600023689.01;PaF106G0300013267.01;PaF106G0100000393.01;PaF106G0100000013.01
GO:0046777	protein autophosphorylation	65	0.289039	0.918559	0.607619	0.983888	3164	PaF106G0400017491.01;PaF106G0600022412.01;PaF106G0400017490.01;PaF106G0600022022.01;Prunus_sibirica_newGene_317;PaF106G0600024874.01;PaF106G0600022891.01;PaF106G0500020286.01;PaF106G0400017069.01;PaF106G0400017070.01;PaF106G0500020830.01;PaF106G0600022903.01;PaF106G0100004242.01;PaF106G0600022907.01;PaF106G0500019560.01;PaF106G0400014979.01
GO:0060968	regulation of gene silencing	13	-0.384629	-0.887745	0.610998	0.983888	2905	PaF106G0400015550.01;PaF106G0500018649.01
GO:0048523	negative regulation of cellular process	100	-0.26851	-0.923358	0.6125	0.983888	4683	PaF106G0300012523.01;PaF106G0600024910.01;PaF106G0800030127.01;PaF106G0800029865.01;PaF106G0600023689.01;PaF106G0100000393.01;PaF106G0300011048.01;Prunus_sibirica_newGene_1840;PaF106G0800032140.01;PaF106G0100005405.01;PaF106G0100004621.01;PaF106G0400014772.01;PaF106G0800029863.01;PaF106G0800029665.01;PaF106G0400018285.01;PaF106G0200007263.01;PaF106G0100001998.01;PaF106G0600024924.01;PaF106G070002…
GO:0043928	exonucleolytic nuclear-transcribed mRNA catabolic process involved in deadenylation-dependent decay	11	0.400634	0.87528	0.613153	0.983888	2817	Prunus_sibirica_newGene_1207;PaF106G0300012207.01;Prunus_sibirica_newGene_35
GO:0008643	carbohydrate transport	16	-0.357959	-0.871411	0.617234	0.983888	1438	PaF106G0600025754.01;PaF106G0100001534.01
GO:0051246	regulation of protein metabolic process	36	0.313938	0.884908	0.618677	0.983888	4031	PaF106G0300011024.01;PaF106G0700027967.01;PaF106G0600021737.01;PaF106G0100005656.01;PaF106G0300012465.01;PaF106G0400017027.01;PaF106G0700026415.01;PaF106G0600022565.01;PaF106G0100003259.01
GO:0048827	phyllome development	32	-0.327542	-0.913556	0.622917	0.983888	1477	PaF106G0100004361.01;PaF106G0800032714.01;PaF106G0400017298.01;PaF106G0600023689.01;PaF106G0300013196.01;PaF106G0400015551.01;PaF106G0600024737.01;PaF106G0400015550.01;PaF106G0300012225.01
GO:0030244	cellulose biosynthetic process	28	0.331245	0.884933	0.623327	0.983888	3191	PaF106G0100000423.01;Prunus_sibirica_newGene_701;PaF106G0500019952.01;PaF106G0500019950.01;PaF106G0500018793.01;PaF106G0800030360.01;PaF106G0400015910.01;PaF106G0400017550.01
GO:0000387	spliceosomal snRNP assembly	10	-0.402333	-0.866095	0.623457	0.983888	8487	PaF106G0100006736.01;PaF106G0100002256.01;PaF106G0100001012.01;PaF106G0700027892.01;PaF106G0100001114.01;PaF106G0200010351.01
GO:0000381	regulation of alternative mRNA splicing, via spliceosome	17	-0.357386	-0.88295	0.623984	0.983888	5633	PaF106G0100005950.01;PaF106G0700026826.01;PaF106G0100005319.01;PaF106G0600021466.01;PaF106G0200009815.01;PaF106G0100003088.01
GO:0006520	cellular amino acid metabolic process	24	0.341916	0.88164	0.624266	0.983888	1651	PaF106G0800032168.01;PaF106G0600023983.01;PaF106G0700029232.01;PaF106G0500019140.01
GO:0035295	tube development	11	0.395865	0.864861	0.624758	0.983888	4491	PaF106G0300011240.01;PaF106G0500018967.01;PaF106G0400015823.01;PaF106G0200009240.01;PaF106G0200008034.01;PaF106G0400016868.01
GO:0031047	gene silencing by RNA	30	0.326946	0.886478	0.628788	0.983888	2736	PaF106G0200008074.01;PaF106G0700028562.01;PaF106G0500018794.01;PaF106G0700028561.01;PaF106G0600023278.01
GO:0055072	iron ion homeostasis	17	-0.352428	-0.870699	0.632114	0.983888	461	PaF106G0800032256.01;PaF106G0800032257.01
GO:0048518	positive regulation of biological process	112	0.26469	0.915528	0.633911	0.983888	4491	PaF106G0400016036.01;Prunus_sibirica_newGene_167;PaF106G0200006908.01;PaF106G0600024874.01;PaF106G0700027967.01;PaF106G0500021297.01;PaF106G0100002938.01;PaF106G0300010980.01;PaF106G0800030376.01;PaF106G0800029430.01;PaF106G0800029541.01;PaF106G0100003787.01;PaF106G0600023278.01;PaF106G0300012465.01;PaF106G0400017027.01;PaF106G0700026415.01;PaF106G0400018327.01;PaF106G0100001870.01;PaF106G0500021…
GO:0035239	tube morphogenesis	10	0.39756	0.850188	0.635659	0.983888	4491	PaF106G0300011240.01;PaF106G0500018967.01;PaF106G0400015823.01;PaF106G0200009240.01;PaF106G0200008034.01;PaF106G0400016868.01
GO:0009266	response to temperature stimulus	43	-0.30215	-0.890766	0.641237	0.983888	2638	PaF106G0400018285.01;PaF106G0500019321.01;PaF106G0500020162.01;PaF106G0500020912.01;Prunus_sibirica_newGene_1959;PaF106G0200008710.01;PaF106G0600022140.01;PaF106G0300014431.01;PaF106G0700027029.01
GO:0010467	gene expression	67	0.280669	0.899934	0.641651	0.983888	1509	PaF106G0600022481.01;Prunus_sibirica_newGene_167;PaF106G0100002948.01;Prunus_sibirica_newGene_1207;PaF106G0100000058.01;PaF106G0200008241.01
GO:0006900	vesicle budding from membrane	11	0.391388	0.85508	0.642166	0.983888	2259	PaF106G0300012095.01;PaF106G0100000873.01
GO:0016570	histone modification	22	-0.339194	-0.873004	0.646341	0.983888	2391	PaF106G0400017694.01;PaF106G0100001994.01;PaF106G0500018649.01
GO:0009789	positive regulation of abscisic acid-activated signaling pathway	12	0.384066	0.846602	0.64902	0.983888	4183	PaF106G0100002938.01;PaF106G0100003787.01;PaF106G0600024794.01;PaF106G0400018401.01;PaF106G0100003899.01;PaF106G0300012678.01
GO:0050776	regulation of immune response	19	-0.342645	-0.859601	0.653768	0.983888	3333	PaF106G0700026675.01;PaF106G0100004621.01;PaF106G0200007263.01;PaF106G0300012679.01;PaF106G0300013611.01
GO:0000184	nuclear-transcribed mRNA catabolic process, nonsense-mediated decay	12	0.382353	0.842826	0.654902	0.983888	6390	PaF106G0400015017.01;PaF106G0100006352.01;PaF106G0400017771.01;PaF106G0200009611.01;PaF106G0800031155.01;PaF106G0400015134.01
GO:0019725	cellular homeostasis	18	-0.345897	-0.861465	0.655738	0.983888	2749	PaF106G0200007263.01;PaF106G0200009186.01;PaF106G0200009236.01;PaF106G0500020831.01;PaF106G0300012269.01;PaF106G0300012271.01
GO:0090558	plant epidermis development	14	-0.363511	-0.850843	0.656126	0.983888	1968	PaF106G0200010692.01;PaF106G0100000005.01;PaF106G0500020831.01;PaF106G0300013611.01
GO:0006820	anion transport	11	0.387016	0.845529	0.65764	0.983888	5525	PaF106G0800031477.01;PaF106G0200008488.01;PaF106G0100001416.01;PaF106G0200008123.01;PaF106G0100004225.01;PaF106G0800031479.01
GO:0016049	cell growth	21	0.340599	0.856816	0.660714	0.983888	5049	PaF106G0600024841.01;PaF106G0800031242.01;PaF106G0300011240.01;PaF106G0400018179.01;PaF106G0200008575.01;PaF106G0800029477.01;PaF106G0100000510.01;PaF106G0800031792.01;PaF106G0500020982.01
GO:0009644	response to high light intensity	10	0.38905	0.831989	0.662791	0.983888	5828	PaF106G0700027967.01;PaF106G0300013648.01;PaF106G0700027096.01;PaF106G0100000564.01;PaF106G0500018683.01
GO:0016569	covalent chromatin modification	16	-0.345903	-0.842062	0.663327	0.983888	493	PaF106G0100001994.01;PaF106G0500018649.01
GO:0010628	positive regulation of gene expression	42	0.296181	0.869335	0.665377	0.983888	1263	Prunus_sibirica_newGene_167;PaF106G0700027967.01;PaF106G0500021297.01;PaF106G0300010980.01
GO:0009658	chloroplast organization	62	-0.273956	-0.884965	0.668041	0.983888	5492	PaF106G0800031060.01;PaF106G0200010088.01;PaF106G0600023554.01;PaF106G0200007301.01;PaF106G0800031228.01;PaF106G0200009155.01;PaF106G0200008144.01;PaF106G0600023149.01;PaF106G0100003449.01;PaF106G0800029939.01;PaF106G0100005074.01;PaF106G0800029613.01;PaF106G0200010114.01;PaF106G0300013861.01;PaF106G0600024981.01;PaF106G0400017100.01;PaF106G0700028206.01;PaF106G0400017662.01;PaF106G0800029863.01;…
GO:0018130	heterocycle biosynthetic process	25	0.325725	0.850799	0.669231	0.983888	1103	Prunus_sibirica_newGene_167;PaF106G0100000058.01
GO:0006094	gluconeogenesis	11	0.382052	0.834683	0.67118	0.983888	2587	PaF106G0600024076.01;PaF106G0800032531.01;PaF106G0600024077.01
GO:0031328	positive regulation of cellular biosynthetic process	42	0.295048	0.866011	0.673114	0.983888	1263	Prunus_sibirica_newGene_167;PaF106G0700027967.01;PaF106G0500021297.01;PaF106G0300010980.01
GO:0000280	nuclear division	12	0.376664	0.830287	0.676471	0.983888	234	PaF106G0200010593.01
GO:0000278	mitotic cell cycle	32	-0.316126	-0.881717	0.677083	0.983888	4237	PaF106G0100006249.01;PaF106G0600024713.01;PaF106G0300011048.01;PaF106G0200010493.01;PaF106G0800029954.01;PaF106G0800031267.01;PaF106G0600022073.01;PaF106G0800030763.01;PaF106G0300011411.01;PaF106G0200008738.01
GO:0007049	cell cycle	35	-0.306192	-0.878115	0.681633	0.983888	4967	PaF106G0800029757.01;PaF106G0100002106.01;PaF106G0700027243.01;PaF106G0600023689.01;PaF106G0600022747.01;PaF106G0300011048.01;PaF106G0100004060.01;PaF106G0600024234.01;PaF106G0200010116.01;PaF106G0800031267.01;PaF106G0100002999.01;PaF106G0400017245.01
GO:0051241	negative regulation of multicellular organismal process	16	-0.33705	-0.82051	0.683367	0.983888	4482	PaF106G0300013267.01;PaF106G0100001998.01;PaF106G0600024924.01;PaF106G0100001994.01
GO:0019752	carboxylic acid metabolic process	26	-0.327045	-0.859744	0.688935	0.983888	5033	PaF106G0300014484.01;PaF106G0600025163.01;PaF106G0300014353.01;PaF106G0400015716.01;PaF106G0800030702.01;PaF106G0400015745.01;PaF106G0500019336.01;PaF106G0500018541.01;PaF106G0200009482.01;PaF106G0600024640.01
GO:0009891	positive regulation of biosynthetic process	43	0.290352	0.857786	0.690522	0.983888	1263	Prunus_sibirica_newGene_167;PaF106G0700027967.01;PaF106G0500021297.01;PaF106G0300010980.01
GO:0009414	response to water deprivation	45	0.290631	0.861919	0.692456	0.983888	4461	PaF106G0100003928.01;PaF106G0300011189.01;PaF106G0700027200.01;PaF106G0400017709.01;PaF106G0600022458.01;PaF106G0500019963.01;PaF106G0100004201.01;PaF106G0400018265.01;PaF106G0100005570.01;PaF106G0200009772.01;PaF106G0800029453.01;PaF106G0100001442.01;PaF106G0700027096.01
GO:0009933	meristem structural organization	10	0.378281	0.808959	0.693798	0.983888	7200	PaF106G0100000914.01;PaF106G0100003400.01;PaF106G0700026922.01;PaF106G0100005277.01;PaF106G0600021746.01;PaF106G0500018918.01;PaF106G0400015514.01
GO:0033993	response to lipid	48	-0.287339	-0.873569	0.694444	0.983888	592	PaF106G0300011287.01;PaF106G0500018649.01;PaF106G0300013611.01
GO:0009734	auxin-activated signaling pathway	55	-0.276031	-0.869575	0.695378	0.983888	5840	PaF106G0100005845.01;PaF106G0800029753.01;PaF106G0300013863.01;PaF106G0800029755.01;PaF106G0300013748.01;PaF106G0700026441.01;PaF106G0100005190.01;PaF106G0100000592.01;PaF106G0400015883.01;PaF106G0100000263.01;PaF106G0800029505.01;PaF106G0400017280.01;PaF106G0200009229.01;PaF106G0600022538.01;PaF106G0700028792.01;PaF106G0100004770.01;PaF106G0800029715.01;PaF106G0800032694.01
GO:0002684	positive regulation of immune system process	10	0.377978	0.808311	0.695736	0.983888	4183	PaF106G0300012465.01;PaF106G0400017027.01;PaF106G0500021231.01;PaF106G0300012678.01
GO:0050778	positive regulation of immune response	10	0.377978	0.808311	0.695736	0.983888	4183	PaF106G0300012465.01;PaF106G0400017027.01;PaF106G0500021231.01;PaF106G0300012678.01
GO:0005982	starch metabolic process	11	-0.38212	-0.837626	0.696907	0.983888	3840	PaF106G0200008049.01;PaF106G0700029251.01;PaF106G0600022865.01;PaF106G0100005082.01;PaF106G0100001510.01
GO:0006325	chromatin organization	35	-0.301977	-0.866028	0.7	0.983888	4571	PaF106G0800029743.01;PaF106G0200009220.01;PaF106G0600022353.01;PaF106G0400015551.01;PaF106G0100001998.01;PaF106G0400015550.01;PaF106G0600025382.01;PaF106G0100001994.01;PaF106G0500018649.01
GO:0006402	mRNA catabolic process	16	0.348077	0.816804	0.707753	0.983888	1989	Prunus_sibirica_newGene_1207;PaF106G0300012058.01;PaF106G0300012207.01
GO:0140053	mitochondrial gene expression	12	-0.358172	-0.808997	0.70935	0.983888	95	PaF106G0600022713.01;PaF106G0800032136.01
GO:0006004	fucose metabolic process	33	-0.302506	-0.854636	0.711934	0.983888	73	PaF106G0400018268.01;PaF106G0300014417.01;PaF106G0300011675.01;PaF106G0200008135.01;PaF106G0800031872.01
GO:0002229	defense response to oomycetes	16	-0.327911	-0.798263	0.717435	0.983888	3441	PaF106G0800032612.01;PaF106G0500019545.01;PaF106G0500020467.01;PaF106G0100005549.01;PaF106G0400015359.01
GO:0043067	regulation of programmed cell death	18	-0.324024	-0.806989	0.719262	0.983888	6632	PaF106G0100004375.01;PaF106G0800029283.01;PaF106G0100005714.01;PaF106G0600023689.01;PaF106G0100004621.01;PaF106G0200007263.01;PaF106G0300012530.01
GO:0010604	positive regulation of macromolecule metabolic process	57	0.275196	0.852438	0.720532	0.983888	1375	Prunus_sibirica_newGene_167;PaF106G0200006908.01;PaF106G0700027967.01;PaF106G0500021297.01;PaF106G0300010980.01;PaF106G0800030376.01
GO:0048581	negative regulation of post-embryonic development	12	-0.352578	-0.796364	0.721545	0.983888	4482	PaF106G0300013267.01;PaF106G0100001998.01;PaF106G0100001994.01
GO:0042273	ribosomal large subunit biogenesis	18	-0.321364	-0.800365	0.723361	0.983888	6455	PaF106G0100000507.01;PaF106G0600024194.01;PaF106G0800029408.01;PaF106G0100002923.01;PaF106G0300014590.01;PaF106G0600021536.01
GO:0006813	potassium ion transport	12	-0.351413	-0.793732	0.723577	0.983888	950	PaF106G0800029463.01
GO:0034475	U4 snRNA 3'-end processing	10	0.369011	0.789136	0.724806	0.983888	1989	Prunus_sibirica_newGene_1207;PaF106G0300012207.01
GO:0072657	protein localization to membrane	13	-0.347575	-0.802224	0.725051	0.983888	737	PaF106G0100004949.01
GO:0043161	proteasome-mediated ubiquitin-dependent protein catabolic process	83	0.260491	0.865454	0.726755	0.983888	4739	PaF106G0300011024.01;PaF106G0100005658.01;PaF106G0600021737.01;PaF106G0100005656.01;PaF106G0100003787.01;PaF106G0300011567.01;PaF106G0800030128.01;PaF106G0600025367.01;PaF106G0200009042.01;PaF106G0300012465.01;PaF106G0400017027.01;PaF106G0100001870.01;PaF106G0600022565.01;PaF106G0100003259.01;PaF106G0100003942.01;PaF106G0800030247.01;PaF106G0700027182.01
GO:0030154	cell differentiation	84	0.258356	0.861551	0.728814	0.983888	5181	PaF106G0600024841.01;PaF106G0600023626.01;PaF106G0800031242.01;PaF106G0300014434.01;PaF106G0800031477.01;PaF106G0100005212.01;PaF106G0300012566.01;PaF106G0400015769.01;PaF106G0300012734.01;PaF106G0300011240.01;PaF106G0300014123.01;PaF106G0400018179.01;PaF106G0200010252.01;PaF106G0100001431.01;PaF106G0500018967.01;PaF106G0300013002.01;PaF106G0300013907.01;PaF106G0300013171.01;PaF106G0600025504.01;…
GO:0034599	cellular response to oxidative stress	20	-0.315647	-0.807445	0.730539	0.983888	3905	PaF106G0700027091.01;PaF106G0400018110.01;PaF106G0100004232.01;PaF106G0200007263.01;PaF106G0200008513.01;PaF106G0600024407.01
GO:0006914	autophagy	22	0.313716	0.795014	0.731373	0.983888	1764	PaF106G0400018133.01;PaF106G0700028058.01;PaF106G0100001264.01
GO:0018298	protein-chromophore linkage	20	-0.315187	-0.80627	0.732535	0.983888	7065	PaF106G0800030884.01;PaF106G0600023109.01;PaF106G0300012505.01;PaF106G0300012213.01;PaF106G0400015937.01;PaF106G0200009956.01;PaF106G0600025139.01;PaF106G0500020784.01;PaF106G0500018484.01;PaF106G0400017422.01
GO:0051173	positive regulation of nitrogen compound metabolic process	57	0.27336	0.84675	0.735741	0.983888	1375	Prunus_sibirica_newGene_167;PaF106G0200006908.01;PaF106G0700027967.01;PaF106G0500021297.01;PaF106G0300010980.01;PaF106G0800030376.01
GO:0006790	sulfur compound metabolic process	21	-0.310406	-0.80229	0.738956	0.983888	220	Prunus_sibirica_newGene_1840;PaF106G0100003185.01;PaF106G0300012225.01
GO:0016126	sterol biosynthetic process	15	0.340551	0.788035	0.739479	0.983888	2093	PaF106G0600024138.01;PaF106G0500019433.01;PaF106G0800030710.01
GO:0000963	mitochondrial RNA processing	14	-0.337798	-0.790659	0.741107	0.983888	95	PaF106G0600022713.01;PaF106G0800032136.01
GO:0051649	establishment of localization in cell	36	0.291918	0.82284	0.745136	0.983888	4382	PaF106G0200010593.01;Prunus_sibirica_newGene_1434;PaF106G0600024435.01;PaF106G0600025386.01;PaF106G0100001416.01;PaF106G0400018404.01;PaF106G0100003899.01;PaF106G0800029530.01
GO:0042592	homeostatic process	32	-0.292828	-0.816734	0.745833	0.983888	4787	PaF106G0200009472.01;PaF106G0500020657.01;PaF106G0100000854.01;PaF106G0400015883.01;PaF106G0300011048.01;PaF106G0100004232.01;PaF106G0200007263.01;PaF106G0200009186.01;PaF106G0200009236.01;PaF106G0500020831.01;PaF106G0600024242.01;PaF106G0300012269.01;PaF106G0300012271.01
GO:0051130	positive regulation of cellular component organization	14	-0.331791	-0.776599	0.749012	0.983888	5862	PaF106G0400015552.01;PaF106G0100003617.01;PaF106G0600024236.01;PaF106G0800029283.01;PaF106G0100001000.01;PaF106G0800030127.01;PaF106G0100006133.01;PaF106G0400015551.01;PaF106G0400015550.01
GO:0034427	nuclear-transcribed mRNA catabolic process, exonucleolytic, 3'-5'	11	0.348901	0.762257	0.752418	0.983888	1989	Prunus_sibirica_newGene_1207;PaF106G0300012207.01
GO:0009826	unidimensional cell growth	25	0.296915	0.775547	0.763462	0.983888	5049	PaF106G0600024841.01;PaF106G0800031242.01;PaF106G0200010411.01;PaF106G0300011240.01;PaF106G0400018179.01;PaF106G0200008575.01;PaF106G0800029477.01;PaF106G0100000510.01;PaF106G0800031792.01;PaF106G0500020982.01
GO:0009967	positive regulation of signal transduction	17	-0.312593	-0.772284	0.76626	0.983888	2595	PaF106G0500019589.01;PaF106G0300012679.01;PaF106G0600024829.01
GO:0023056	positive regulation of signaling	17	-0.312593	-0.772284	0.76626	0.983888	2595	PaF106G0500019589.01;PaF106G0300012679.01;PaF106G0600024829.01
GO:0048608	reproductive structure development	62	-0.255454	-0.825196	0.76701	0.983888	5852	PaF106G0800032714.01;PaF106G0500019240.01;PaF106G0300013832.01;PaF106G0100006732.01;PaF106G0200010668.01;PaF106G0300012405.01;PaF106G0400017298.01;PaF106G0800029757.01;PaF106G0800030127.01;PaF106G0200009155.01;PaF106G0100006270.01;PaF106G0600023689.01;PaF106G0100003918.01;PaF106G0500021073.01;PaF106G0700026051.01;PaF106G0400015551.01;PaF106G0600023607.01;PaF106G0100001840.01;PaF106G0600024526.01;…
GO:0061458	reproductive system development	62	-0.255454	-0.825196	0.76701	0.983888	5852	PaF106G0800032714.01;PaF106G0500019240.01;PaF106G0300013832.01;PaF106G0100006732.01;PaF106G0200010668.01;PaF106G0300012405.01;PaF106G0400017298.01;PaF106G0800029757.01;PaF106G0800030127.01;PaF106G0200009155.01;PaF106G0100006270.01;PaF106G0600023689.01;PaF106G0100003918.01;PaF106G0500021073.01;PaF106G0700026051.01;PaF106G0400015551.01;PaF106G0600023607.01;PaF106G0100001840.01;PaF106G0600024526.01;…
GO:0070727	cellular macromolecule localization	40	-0.281937	-0.822152	0.768595	0.983888	4467	PaF106G0100000544.01;PaF106G0400014991.01;PaF106G0200009867.01;PaF106G0800029283.01;PaF106G0400015793.01;PaF106G0100005714.01;PaF106G0400016045.01;PaF106G0600023689.01;PaF106G0300011048.01;PaF106G0100002441.01;PaF106G0600025385.01;PaF106G0500020912.01;PaF106G0100000865.01;PaF106G0100004949.01;PaF106G0100005229.01
GO:0051321	meiotic cell cycle	17	0.324606	0.77687	0.770588	0.983888	1824	PaF106G0800030312.01;PaF106G0800031477.01
GO:0006885	regulation of pH	10	0.34666	0.741336	0.771318	0.983888	3008	PaF106G0200010038.01;PaF106G0100002555.01;PaF106G0600021931.01
GO:0016075	rRNA catabolic process	11	0.34437	0.752358	0.773694	0.983888	1989	Prunus_sibirica_newGene_1207;PaF106G0300012207.01
GO:0051225	spindle assembly	12	-0.333867	-0.7541	0.776423	0.983888	1906	PaF106G0400018008.01;PaF106G0400018436.01
GO:1902680	positive regulation of RNA biosynthetic process	36	0.285454	0.804619	0.77821	0.983888	1263	Prunus_sibirica_newGene_167;PaF106G0500021297.01;PaF106G0300010980.01
GO:1903508	positive regulation of nucleic acid-templated transcription	36	0.285454	0.804619	0.77821	0.983888	1263	Prunus_sibirica_newGene_167;PaF106G0500021297.01;PaF106G0300010980.01
GO:0032268	regulation of cellular protein metabolic process	22	-0.300072	-0.772313	0.780488	0.983888	5862	PaF106G0100001000.01;PaF106G0100000752.01;PaF106G0300012078.01;PaF106G0600024910.01;PaF106G0300011084.01;PaF106G0100006133.01;PaF106G0800032140.01;PaF106G0400015551.01;PaF106G0400015550.01
GO:0016036	cellular response to phosphate starvation	15	-0.31736	-0.756991	0.781312	0.983888	205	PaF106G0100003337.01
GO:0048584	positive regulation of response to stimulus	31	0.285657	0.778608	0.782692	0.983888	4491	PaF106G0100002938.01;PaF106G0800029430.01;PaF106G0100003787.01;PaF106G0600023278.01;PaF106G0300012465.01;PaF106G0400017027.01;PaF106G0500021231.01;PaF106G0400018401.01;PaF106G0100003899.01;PaF106G0300012678.01;PaF106G0200008034.01;PaF106G0400016868.01
GO:0016180	snRNA processing	10	0.342908	0.733313	0.782946	0.983888	1989	Prunus_sibirica_newGene_1207;PaF106G0300012207.01
GO:0010016	shoot system morphogenesis	16	-0.306035	-0.745008	0.783567	0.983888	1477	PaF106G0300013611.01
GO:0006904	vesicle docking involved in exocytosis	12	0.342542	0.755071	0.784314	0.983888	12768	PaF106G0200008700.01;PaF106G0100003325.01;PaF106G0500019430.01;PaF106G0800030428.01;PaF106G0800032673.01;PaF106G0600024515.01;PaF106G0200009462.01;PaF106G0200009458.01;PaF106G0800032943.01;PaF106G0300013296.01;PaF106G0300011859.01;PaF106G0800029363.01
GO:0048513	animal organ development	14	-0.319284	-0.747325	0.784585	0.983888	1303	PaF106G0200010599.01
GO:0006108	malate metabolic process	11	0.336204	0.734518	0.7853	0.983888	4683	PaF106G0400016787.01;PaF106G0300013925.01;PaF106G0200008017.01;PaF106G0800030705.01;PaF106G0400017669.01
GO:0010224	response to UV-B	10	0.341593	0.730502	0.786822	0.983888	875	PaF106G0400016573.01
GO:0007275	multicellular organism development	164	-0.234207	-0.869183	0.788187	0.983888	4523	PaF106G0200009155.01;PaF106G0400015756.01;PaF106G0100006270.01;PaF106G0600023689.01;PaF106G0300013267.01;PaF106G0100003918.01;PaF106G0300012777.01;PaF106G0300012622.01;PaF106G0100000005.01;PaF106G0300011048.01;PaF106G0800032140.01;PaF106G0600022421.01;PaF106G0500021073.01;PaF106G0100003185.01;PaF106G0700026051.01;PaF106G0600024234.01;PaF106G0600022713.01;PaF106G0400015551.01;PaF106G0800029856.01;…
GO:0043414	macromolecule methylation	13	-0.320849	-0.740538	0.788187	0.983888	2391	PaF106G0100001994.01
GO:0030030	cell projection organization	10	0.339218	0.725423	0.792636	0.983888	5828	PaF106G0300011240.01;PaF106G0500018967.01;PaF106G0200009240.01;PaF106G0200007329.01;PaF106G0500018683.01
GO:0120036	plasma membrane bounded cell projection organization	10	0.339218	0.725423	0.792636	0.983888	5828	PaF106G0300011240.01;PaF106G0500018967.01;PaF106G0200009240.01;PaF106G0200007329.01;PaF106G0500018683.01
GO:0044085	cellular component biogenesis	78	0.252329	0.832304	0.793561	0.983888	3487	Prunus_sibirica_newGene_167;PaF106G0200010593.01;PaF106G0300013257.01;Prunus_sibirica_newGene_1207;PaF106G0800031477.01;PaF106G0300012207.01;PaF106G0600024367.01;PaF106G0500019123.01;PaF106G0300011240.01;PaF106G0200008021.01;PaF106G0500018967.01
GO:0080134	regulation of response to stress	38	-0.275771	-0.796467	0.795132	0.983888	3333	PaF106G0100003185.01;PaF106G0100005405.01;PaF106G0200007263.01;PaF106G0300012530.01;PaF106G0300012679.01;PaF106G0200009482.01;PaF106G0300013611.01
GO:0050790	regulation of catalytic activity	34	-0.279296	-0.787623	0.795833	0.983888	4869	PaF106G0300012078.01;PaF106G0600024910.01;PaF106G0400016045.01;PaF106G0800032140.01;PaF106G0100002441.01;PaF106G0400014772.01;PaF106G0300012679.01;PaF106G0300012225.01
GO:0019953	sexual reproduction	22	0.297445	0.753781	0.796078	0.983888	5828	PaF106G0800030488.01;PaF106G0800031477.01;PaF106G0400015769.01;PaF106G0500018967.01;PaF106G0600021767.01;PaF106G0200008034.01;PaF106G0400016868.01;PaF106G0100001555.01;PaF106G0800031479.01;PaF106G0500018683.01
GO:1901419	regulation of response to alcohol	18	0.311181	0.754785	0.797665	0.983888	6658	PaF106G0100002938.01;PaF106G0100003787.01;Prunus_sibirica_newGene_122;PaF106G0400018401.01;PaF106G0100003899.01;PaF106G0300012678.01;PaF106G0100004186.01;Prunus_sibirica_newGene_1999;PaF106G0600024244.01;PaF106G0300012680.01;PaF106G0100002852.01
GO:1905957	regulation of cellular response to alcohol	18	0.311181	0.754785	0.797665	0.983888	6658	PaF106G0100002938.01;PaF106G0100003787.01;Prunus_sibirica_newGene_122;PaF106G0400018401.01;PaF106G0100003899.01;PaF106G0300012678.01;PaF106G0100004186.01;Prunus_sibirica_newGene_1999;PaF106G0600024244.01;PaF106G0300012680.01;PaF106G0100002852.01
GO:0008219	cell death	10	-0.341757	-0.735695	0.798354	0.983888	3573	PaF106G0100004375.01;PaF106G0200010379.01;PaF106G0200009938.01;PaF106G0200007263.01
GO:0000288	nuclear-transcribed mRNA catabolic process, deadenylation-dependent decay	10	0.337919	0.722645	0.79845	0.983888	1989	Prunus_sibirica_newGene_1207;PaF106G0300012207.01
GO:0033554	cellular response to stress	67	0.256613	0.822803	0.79925	0.983888	875	PaF106G0800030114.01;PaF106G0400018009.01;PaF106G0600024841.01;PaF106G0700028154.01;PaF106G0400016573.01
GO:0006406	mRNA export from nucleus	11	-0.341104	-0.747717	0.802062	0.983888	7126	PaF106G0300012795.01;PaF106G0600024443.01;PaF106G0700029202.01;PaF106G0500020567.01;PaF106G0100005071.01;PaF106G0600021760.01;PaF106G0300014176.01;PaF106G0100002937.01
GO:0048519	negative regulation of biological process	128	-0.242558	-0.859209	0.805031	0.983888	4683	PaF106G0300012523.01;PaF106G0600024910.01;PaF106G0800030127.01;PaF106G0200009155.01;PaF106G0800029865.01;PaF106G0100006133.01;PaF106G0600023689.01;PaF106G0300013267.01;PaF106G0100000393.01;PaF106G0300011048.01;Prunus_sibirica_newGene_1840;PaF106G0800032140.01;PaF106G0700026675.01;PaF106G0100003185.01;PaF106G0100005405.01;PaF106G0100004621.01;PaF106G0400014772.01;PaF106G0800029863.01;PaF106G080002…
GO:0051017	actin filament bundle assembly	10	0.330253	0.706252	0.806202	0.983888	6682	PaF106G0500019646.01;PaF106G0300012140.01;PaF106G0400015549.01;PaF106G0800030837.01;PaF106G0600023885.01;PaF106G0700028432.01
GO:0010638	positive regulation of organelle organization	10	-0.338269	-0.728187	0.806584	0.983888	5862	PaF106G0100001000.01;PaF106G0100006133.01;PaF106G0400015551.01;PaF106G0400015550.01
GO:0002682	regulation of immune system process	22	-0.294366	-0.757626	0.808943	0.983888	3333	PaF106G0700026675.01;PaF106G0100004621.01;PaF106G0200007263.01;PaF106G0300012679.01;PaF106G0300013611.01
GO:0046856	phosphatidylinositol dephosphorylation	12	-0.323834	-0.731439	0.808943	0.983888	1480	PaF106G0600024511.01
GO:0006457	protein folding	103	-0.240948	-0.833161	0.809623	0.983888	5996	PaF106G0100002918.01;PaF106G0600023253.01;PaF106G0100000200.01;PaF106G0500021253.01;PaF106G0300013598.01;PaF106G0500021332.01;PaF106G0300012184.01;PaF106G0200010666.01;PaF106G0100004208.01;PaF106G0100001661.01;PaF106G0800030663.01;PaF106G0300014611.01;PaF106G0200010292.01;PaF106G0400015592.01;PaF106G0100000901.01;PaF106G0100004287.01;PaF106G0600025843.01;PaF106G0100003512.01;PaF106G0100006270.01;…
GO:0006002	fructose 6-phosphate metabolic process	11	0.327695	0.715928	0.810445	0.983888	4631	PaF106G0800032531.01;PaF106G0700026545.01;PaF106G0100005177.01;PaF106G0600024709.01
GO:0001666	response to hypoxia	14	0.323148	0.735419	0.810484	0.983888	1101	PaF106G0400014796.01;PaF106G0100006001.01
GO:0000463	maturation of LSU-rRNA from tricistronic rRNA transcript (SSU-rRNA, 5.8S rRNA, LSU-rRNA)	13	-0.312817	-0.721998	0.810591	0.983888	7031	PaF106G0100000849.01;PaF106G0600022394.01;PaF106G0300011177.01;PaF106G0700028484.01;PaF106G0600022534.01;PaF106G0400017472.01
GO:0032482	Rab protein signal transduction	23	0.291294	0.748484	0.8119	0.983888	7254	PaF106G0500021220.01;PaF106G0400017702.01;PaF106G0600023565.01;PaF106G0700027635.01;PaF106G0400016183.01;PaF106G0400018351.01;PaF106G0300013323.01;PaF106G0400014883.01;PaF106G0600023807.01;PaF106G0600022174.01;PaF106G0500019182.01
GO:0000466	maturation of 5.8S rRNA from tricistronic rRNA transcript (SSU-rRNA, 5.8S rRNA, LSU-rRNA)	11	0.327551	0.715612	0.812379	0.983888	1989	Prunus_sibirica_newGene_1207;PaF106G0300012207.01
GO:0009741	response to brassinosteroid	10	-0.334027	-0.719055	0.812757	0.983888	1338	PaF106G0600021578.01;PaF106G0600024829.01
GO:0043069	negative regulation of programmed cell death	10	-0.332873	-0.716571	0.812757	0.983888	5862	PaF106G0100005714.01;PaF106G0600023689.01;PaF106G0100004621.01;PaF106G0200007263.01
GO:0048522	positive regulation of cellular process	97	0.245122	0.832405	0.813333	0.983888	1375	PaF106G0400016036.01;Prunus_sibirica_newGene_167;PaF106G0200006908.01;PaF106G0700027967.01;PaF106G0500021297.01;PaF106G0100002938.01;PaF106G0300010980.01;PaF106G0800030376.01
GO:0015995	chlorophyll biosynthetic process	13	-0.308987	-0.713159	0.816701	0.983888	4837	PaF106G0200010051.01;PaF106G0600021814.01;PaF106G0700029087.01
GO:0008299	isoprenoid biosynthetic process	13	-0.307897	-0.710644	0.818737	0.983888	6200	PaF106G0100004092.01;PaF106G0400016426.01;PaF106G0100002657.01;PaF106G0400014799.01;PaF106G0800030533.01
GO:0006284	base-excision repair	17	-0.286044	-0.706695	0.819106	0.983888	3436	PaF106G0300013586.01;PaF106G0700028530.01;PaF106G0500020352.01;PaF106G0600025144.01;PaF106G0100004072.01
GO:0051093	negative regulation of developmental process	20	-0.293461	-0.750691	0.820359	0.983888	4482	PaF106G0300013267.01;PaF106G0100000393.01;PaF106G0100001998.01;PaF106G0600024924.01;PaF106G0100001994.01
GO:0032270	positive regulation of cellular protein metabolic process	12	-0.320537	-0.723993	0.821138	0.983888	5862	PaF106G0100001000.01;PaF106G0100000752.01;PaF106G0300011084.01;PaF106G0100006133.01;PaF106G0400015551.01;PaF106G0400015550.01
GO:0051247	positive regulation of protein metabolic process	12	-0.320537	-0.723993	0.821138	0.983888	5862	PaF106G0100001000.01;PaF106G0100000752.01;PaF106G0300011084.01;PaF106G0100006133.01;PaF106G0400015551.01;PaF106G0400015550.01
GO:0006397	mRNA processing	63	0.255408	0.806813	0.823864	0.983888	3669	PaF106G0600022481.01;Prunus_sibirica_newGene_1723;PaF106G0200008241.01;PaF106G0400014686.01;Prunus_sibirica_newGene_2045;PaF106G0800030109.01;PaF106G0800029842.01;PaF106G0100001375.01;Prunus_sibirica_newGene_1660;PaF106G0200006932.01;PaF106G0500018537.01
GO:0006518	peptide metabolic process	13	-0.307453	-0.70962	0.824847	0.983888	633	PaF106G0100005672.01;PaF106G0500019671.01;PaF106G0600025163.01;PaF106G0100003185.01;Prunus_sibirica_newGene_263
GO:0000160	phosphorelay signal transduction system	22	-0.290648	-0.748057	0.825203	0.983888	5302	PaF106G0100002896.01;PaF106G0500019030.01;PaF106G0100004613.01;PaF106G0600022873.01;PaF106G0200010129.01;PaF106G0200010767.01;PaF106G0600025486.01;PaF106G0600024431.01
GO:0000460	maturation of 5.8S rRNA	11	0.322483	0.704541	0.825919	0.983888	1989	Prunus_sibirica_newGene_1207;PaF106G0300012207.01
GO:0044262	cellular carbohydrate metabolic process	11	-0.327154	-0.717139	0.826804	0.983888	5904	PaF106G0300011039.01;PaF106G0700028492.01;PaF106G0700029251.01;PaF106G0100005714.01;PaF106G0600023689.01;PaF106G0100005082.01
GO:0006401	RNA catabolic process	30	-0.272775	-0.750112	0.827004	0.983888	3709	PaF106G0800032140.01;PaF106G0100003155.01;PaF106G0400018443.01;PaF106G0100000758.01;PaF106G0500018662.01;PaF106G0500018469.01;Prunus_sibirica_newGene_551
GO:0009744	response to sucrose	10	-0.326025	-0.701829	0.82716	0.983888	1186	PaF106G0600022645.01;PaF106G0100005081.01;PaF106G0100003796.01
GO:0030245	cellulose catabolic process	12	-0.317868	-0.717964	0.827236	0.983888	2555	PaF106G0500019757.01;PaF106G0500020052.01;PaF106G0100003916.01
GO:0030163	protein catabolic process	87	0.244415	0.816824	0.827255	0.983888	3765	PaF106G0300011024.01;PaF106G0800032199.01;PaF106G0100001769.01;PaF106G0600021737.01;PaF106G0100005656.01;PaF106G0800029637.01;PaF106G0100003787.01;PaF106G0300011567.01;PaF106G0600025367.01;PaF106G0200009042.01;PaF106G0200007188.01;PaF106G0300012465.01;PaF106G0400017027.01;PaF106G0100001870.01;PaF106G0100004673.01;PaF106G0600022565.01
GO:1901362	organic cyclic compound biosynthetic process	27	0.276991	0.731484	0.828185	0.983888	1103	Prunus_sibirica_newGene_167;PaF106G0100000058.01
GO:0007131	reciprocal meiotic recombination	13	0.312651	0.702326	0.833659	0.983888	3200	PaF106G0200008682.01;PaF106G0500019257.01;PaF106G0100005965.01
GO:0000904	cell morphogenesis involved in differentiation	20	0.292414	0.7278	0.836327	0.983888	5049	PaF106G0600024841.01;PaF106G0800031242.01;PaF106G0300012566.01;PaF106G0300011240.01;PaF106G0400018179.01;PaF106G0200008575.01;PaF106G0800029477.01;PaF106G0100000510.01;PaF106G0500020982.01
GO:0046907	intracellular transport	36	0.27179	0.766105	0.836576	0.983888	4382	PaF106G0200010593.01;Prunus_sibirica_newGene_1434;PaF106G0600024435.01;PaF106G0600025386.01;PaF106G0100001416.01;PaF106G0100003899.01;PaF106G0800029530.01
GO:0031325	positive regulation of cellular metabolic process	59	0.256966	0.798884	0.837165	0.983888	1375	Prunus_sibirica_newGene_167;PaF106G0200006908.01;PaF106G0700027967.01;PaF106G0500021297.01;PaF106G0300010980.01;PaF106G0800030376.01
GO:0022402	cell cycle process	30	-0.269875	-0.742137	0.837553	0.983888	4967	PaF106G0800029757.01;PaF106G0100002106.01;PaF106G0600023689.01;PaF106G0300011048.01;PaF106G0600024234.01;PaF106G0200010116.01;PaF106G0800031267.01;PaF106G0100002999.01;PaF106G0400017245.01
GO:0009788	negative regulation of abscisic acid-activated signaling pathway	13	0.312029	0.700928	0.837573	0.983888	6658	Prunus_sibirica_newGene_122;PaF106G0700026176.01;PaF106G0100004186.01;PaF106G0100006072.01;Prunus_sibirica_newGene_1999;PaF106G0600024244.01;PaF106G0100002852.01
GO:0022622	root system development	27	-0.277786	-0.742028	0.838843	0.983888	5296	PaF106G0300012405.01;PaF106G0200010457.01;PaF106G0100000005.01;PaF106G0500021073.01;PaF106G0100003185.01;PaF106G0800029856.01;PaF106G0500020831.01;PaF106G0600024737.01
GO:0009657	plastid organization	26	0.276006	0.728988	0.839388	0.983888	3996	PaF106G0300013257.01;PaF106G0100000058.01;PaF106G0100000725.01;PaF106G0100004041.01;PaF106G0400018404.01;PaF106G0800032787.01
GO:0034605	cellular response to heat	11	0.315623	0.689553	0.843327	0.983888	3155	PaF106G0600024841.01;PaF106G0100003966.01;PaF106G0200010463.01
GO:0044087	regulation of cellular component biogenesis	13	-0.302504	-0.698196	0.845214	0.983888	2261	PaF106G0100003617.01;PaF106G0600024236.01;PaF106G0100001480.01;PaF106G0600024395.01;PaF106G0600024924.01;PaF106G0100002765.01
GO:0000911	cytokinesis by cell plate formation	13	0.303465	0.681688	0.851272	0.983888	1834	PaF106G0200008719.01;PaF106G0600025528.01
GO:0006368	transcription elongation from RNA polymerase II promoter	12	0.312423	0.688679	0.856863	0.983888	8027	PaF106G0700026618.01;PaF106G0300011014.01;PaF106G0800032701.01;PaF106G0200009426.01;PaF106G0100000224.01;PaF106G0300013929.01;PaF106G0400016179.01
GO:0007276	gamete generation	12	-0.30834	-0.696443	0.857724	0.983888	714	PaF106G0400017245.01
GO:0000226	microtubule cytoskeleton organization	36	0.263453	0.742605	0.859922	0.983888	4323	PaF106G0200010593.01;PaF106G0200008719.01;PaF106G0600024398.01;PaF106G0800031477.01;PaF106G0500021224.01;PaF106G0600021419.01;PaF106G0400017165.01;PaF106G0400015823.01;PaF106G0200009619.01;PaF106G0600021764.01
GO:0007030	Golgi organization	17	0.284631	0.681199	0.860784	0.983888	5105	PaF106G0300011475.01;PaF106G0200008021.01;PaF106G0400015823.01;PaF106G0100006574.01;PaF106G0500021219.01
GO:0043087	regulation of GTPase activity	18	0.283296	0.687149	0.861868	0.983888	4885	PaF106G0600024435.01;PaF106G0500021231.01;PaF106G0400015823.01;PaF106G0400018401.01;PaF106G0100003899.01;PaF106G0300012678.01;PaF106G0400016295.01
GO:0016236	macroautophagy	10	-0.311974	-0.671581	0.86214	0.983888	7423	PaF106G0600022650.01;PaF106G0300014275.01;PaF106G0300012078.01;PaF106G0600025385.01
GO:0080090	regulation of primary metabolic process	184	0.22718	0.844644	0.862403	0.983888	4401	PaF106G0400016036.01;Prunus_sibirica_newGene_167;PaF106G0300011024.01;PaF106G0800030114.01;PaF106G0200006908.01;PaF106G0700027967.01;Prunus_sibirica_newGene_1207;PaF106G0100000058.01;PaF106G0500021297.01;PaF106G0300010980.01;PaF106G0800030376.01;PaF106G0100001999.01;PaF106G0600021737.01;PaF106G0500019963.01;PaF106G0300012207.01;PaF106G0800029541.01;PaF106G0100005656.01;PaF106G0100000914.01;PaF106…
GO:0010498	proteasomal protein catabolic process	66	0.245451	0.78284	0.863894	0.983888	4348	PaF106G0300011024.01;PaF106G0600021737.01;PaF106G0100005656.01;PaF106G0100003787.01;PaF106G0300011567.01;PaF106G0600025367.01;PaF106G0200009042.01;PaF106G0300012465.01;PaF106G0400017027.01;PaF106G0100001870.01;PaF106G0600022565.01;PaF106G0100003259.01;PaF106G0100003942.01
GO:0010154	fruit development	36	-0.255894	-0.734194	0.864754	0.983888	5852	PaF106G0800032714.01;PaF106G0300013832.01;PaF106G0100006732.01;PaF106G0200010668.01;PaF106G0300012405.01;PaF106G0800029757.01;PaF106G0800030127.01;PaF106G0100006270.01;PaF106G0100003918.01;PaF106G0500021073.01;PaF106G0700026051.01;PaF106G0600023607.01;PaF106G0100001840.01;PaF106G0600024526.01;PaF106G0600024737.01;PaF106G0500019379.01
GO:0009664	plant-type cell wall organization	21	-0.274444	-0.709341	0.86747	0.983888	2583	PaF106G0100005714.01;PaF106G0500020785.01;PaF106G0600023689.01;PaF106G0200009297.01;PaF106G0600022265.01;PaF106G0200009821.01;PaF106G0100002149.01
GO:0009834	plant-type secondary cell wall biogenesis	13	-0.297115	-0.685759	0.867617	0.983888	3214	PaF106G0500020151.01;PaF106G0800032675.01;PaF106G0100002746.01
GO:0006413	translational initiation	10	0.304073	0.650265	0.870155	0.983888	3078	PaF106G0700028070.01;PaF106G0700028094.01
GO:0016072	rRNA metabolic process	16	0.294319	0.690654	0.870775	0.983888	2966	Prunus_sibirica_newGene_1207;PaF106G0300012207.01;PaF106G0500019123.01
GO:0051345	positive regulation of hydrolase activity	19	0.275974	0.680134	0.870841	0.983888	4183	PaF106G0600024435.01;PaF106G0500021231.01;PaF106G0400015823.01;PaF106G0400018401.01;PaF106G0100003899.01;PaF106G0300012678.01
GO:0065008	regulation of biological quality	73	-0.237703	-0.780872	0.871036	0.983888	2749	PaF106G0200009472.01;PaF106G0500020657.01;PaF106G0100000854.01;PaF106G0400015883.01;PaF106G0300013267.01;PaF106G0300011048.01;PaF106G0200010379.01;PaF106G0400016478.01;PaF106G0800029722.01;PaF106G0100004232.01;PaF106G0200007263.01;PaF106G0400018443.01;PaF106G0600024924.01;PaF106G0200009186.01;PaF106G0200009236.01;PaF106G0500020831.01;PaF106G0500020162.01;PaF106G0600024242.01;PaF106G0100002765.01;…
GO:0009893	positive regulation of metabolic process	63	0.244835	0.773417	0.871212	0.983888	1375	Prunus_sibirica_newGene_167;PaF106G0200006908.01;PaF106G0700027967.01;PaF106G0500021297.01;PaF106G0300010980.01;PaF106G0800030376.01
GO:0036293	response to decreased oxygen levels	11	0.299086	0.653423	0.874275	0.983888	3903	PaF106G0100006001.01;PaF106G0700026415.01;PaF106G0100006002.01
GO:0070482	response to oxygen levels	11	0.299086	0.653423	0.874275	0.983888	3903	PaF106G0100006001.01;PaF106G0700026415.01;PaF106G0100006002.01
GO:0030488	tRNA methylation	12	-0.304716	-0.688258	0.876016	0.983888	4550	PaF106G0100005968.01;PaF106G0500019134.01
GO:0046854	phosphatidylinositol phosphorylation	15	-0.282646	-0.674189	0.87674	0.983888	737	PaF106G0400018346.01;PaF106G0100004949.01
GO:0006606	protein import into nucleus	24	-0.266781	-0.698617	0.8778	0.983888	4973	PaF106G0100003944.01;PaF106G0100006601.01;PaF106G0200009228.01;PaF106G0300014176.01;PaF106G0100001286.01;PaF106G0600024894.01;PaF106G0100005468.01
GO:0010647	positive regulation of cell communication	19	-0.279772	-0.701872	0.8778	0.983888	2595	PaF106G0400016260.01;PaF106G0500019589.01;PaF106G0300012679.01;PaF106G0600024829.01
GO:0009059	macromolecule biosynthetic process	32	-0.255975	-0.713946	0.879167	0.983888	2691	PaF106G0300012405.01;PaF106G0600025163.01;PaF106G0100002106.01;PaF106G0600023689.01;PaF106G0800029863.01;PaF106G0800029665.01;PaF106G0200010116.01;PaF106G0600025385.01;PaF106G0800030287.01;PaF106G0500020950.01;PaF106G0300011178.01
GO:0034645	cellular macromolecule biosynthetic process	32	-0.255975	-0.713946	0.879167	0.983888	2691	PaF106G0300012405.01;PaF106G0600025163.01;PaF106G0100002106.01;PaF106G0600023689.01;PaF106G0800029863.01;PaF106G0800029665.01;PaF106G0200010116.01;PaF106G0600025385.01;PaF106G0800030287.01;PaF106G0500020950.01;PaF106G0300011178.01
GO:0009637	response to blue light	11	-0.301671	-0.661278	0.880412	0.983888	1397	Prunus_sibirica_newGene_1959;PaF106G0800032376.01
GO:0043632	modification-dependent macromolecule catabolic process	64	0.24349	0.769716	0.882129	0.983888	4031	PaF106G0300011024.01;Prunus_sibirica_newGene_1207;PaF106G0600021737.01;PaF106G0300012207.01;PaF106G0100005656.01;PaF106G0100003787.01;PaF106G0300011567.01;PaF106G0600025367.01;PaF106G0200009042.01;PaF106G0300012465.01;PaF106G0400017027.01;PaF106G0100001870.01;PaF106G0600022565.01;PaF106G0100003259.01
GO:1901698	response to nitrogen compound	27	0.253786	0.670203	0.882239	0.983888	3518	PaF106G0300010980.01;PaF106G0500019963.01;PaF106G0400017937.01;PaF106G0200008488.01;PaF106G0100001870.01
GO:0072594	establishment of protein localization to organelle	10	-0.303129	-0.652541	0.882716	0.983888	1041	PaF106G0100000865.01
GO:0048316	seed development	37	0.256252	0.727968	0.883041	0.983888	748	PaF106G0400016036.01;PaF106G0200009738.01
GO:0044271	cellular nitrogen compound biosynthetic process	28	-0.262601	-0.707422	0.887265	0.983888	4967	PaF106G0600025163.01;PaF106G0100002106.01;PaF106G0400015883.01;PaF106G0300012622.01;PaF106G0200010051.01;PaF106G0500020950.01;PaF106G0300011178.01;PaF106G0300012225.01
GO:0008610	lipid biosynthetic process	25	-0.264977	-0.694201	0.887967	0.983888	3679	PaF106G0400015745.01;PaF106G0700026601.01;PaF106G0200008264.01;PaF106G0200008262.01;PaF106G0600021575.01;PaF106G0500019432.01
GO:0048528	post-embryonic root development	10	-0.297613	-0.640668	0.888889	0.983888	6167	PaF106G0300012405.01;PaF106G0200010457.01;PaF106G0100003185.01
GO:0000027	ribosomal large subunit assembly	22	-0.269515	-0.693665	0.890244	0.983888	8328	PaF106G0700026946.01;PaF106G0100000482.01;PaF106G0100002032.01;PaF106G0200009073.01;PaF106G0600021832.01;PaF106G0700025953.01;PaF106G0300014598.01;PaF106G0700027734.01;PaF106G0600024352.01;PaF106G0800032432.01;PaF106G0200007022.01;PaF106G0500019136.01;PaF106G0100006516.01
GO:0048468	cell development	36	0.253312	0.714019	0.891051	0.983888	4625	PaF106G0600024841.01;PaF106G0800031242.01;PaF106G0800031477.01;PaF106G0300012566.01;PaF106G0300011240.01;PaF106G0400018179.01;PaF106G0500018967.01;PaF106G0600021767.01;PaF106G0200008034.01;PaF106G0800029530.01;PaF106G0200008575.01;PaF106G0800029477.01;PaF106G0400016868.01;PaF106G0100000510.01
GO:0051179	localization	92	-0.228419	-0.779241	0.893661	0.983888	1642	PaF106G0100000854.01;PaF106G0200008020.01;PaF106G0500019142.01;PaF106G0600023689.01;PaF106G0300013267.01;PaF106G0300011048.01;PaF106G0600024981.01;PaF106G0100003386.01;PaF106G0100002441.01;PaF106G0600025385.01;PaF106G0500020912.01;PaF106G0600024737.01;PaF106G0100000865.01;PaF106G0100002765.01;PaF106G0200010599.01;PaF106G0100004949.01;PaF106G0300012269.01;PaF106G0100005229.01;PaF106G0300012271.01
GO:0080135	regulation of cellular response to stress	13	-0.283366	-0.654024	0.89613	0.983888	6632	PaF106G0100004361.01;PaF106G0600023304.01;PaF106G0200007263.01;PaF106G0300012530.01
GO:0001732	formation of cytoplasmic translation initiation complex	16	0.276537	0.648927	0.89662	0.983888	7975	PaF106G0700028070.01;PaF106G0700028094.01;PaF106G0300011620.01;PaF106G0200009935.01;PaF106G0600021844.01;PaF106G0100004023.01;PaF106G0100005251.01;PaF106G0600022180.01;PaF106G0700028495.01
GO:0033044	regulation of chromosome organization	16	0.276913	0.64981	0.89662	0.983888	3518	PaF106G0500021297.01;PaF106G0600023278.01;PaF106G0700026415.01;PaF106G0100001870.01
GO:0009787	regulation of abscisic acid-activated signaling pathway	20	0.258984	0.644593	0.9002	0.983888	4513	PaF106G0100002938.01;PaF106G0100003787.01;Prunus_sibirica_newGene_122;PaF106G0400018401.01;PaF106G0100003899.01;PaF106G0300012678.01;PaF106G0100004186.01
GO:0010558	negative regulation of macromolecule biosynthetic process	29	-0.251746	-0.686166	0.901053	0.983888	4625	PaF106G0800030127.01;PaF106G0100005405.01;PaF106G0400014772.01;PaF106G0800029665.01;PaF106G0100001998.01;PaF106G0100001994.01
GO:0000122	negative regulation of transcription from RNA polymerase II promoter	10	-0.289021	-0.62217	0.901235	0.983888	3334	PaF106G0300014546.01;PaF106G0400015325.01;PaF106G0500020613.01;PaF106G0500019587.01
GO:0009833	plant-type primary cell wall biogenesis	17	-0.2555	-0.631231	0.904472	0.983888	1278	PaF106G0600023689.01;PaF106G0200006971.01;PaF106G0500018448.01;PaF106G0100000039.01;PaF106G0400015909.01;PaF106G0600021666.01
GO:0097305	response to alcohol	40	-0.244897	-0.71414	0.904959	0.983888	1094	PaF106G0400016260.01;PaF106G0600022140.01;PaF106G0300011287.01;PaF106G0300013611.01
GO:0031935	regulation of chromatin silencing	10	0.287816	0.615498	0.905039	0.983888	2736	PaF106G0500021297.01;PaF106G0600023278.01
GO:0033036	macromolecule localization	54	-0.234301	-0.73353	0.905063	0.983888	1642	PaF106G0200008020.01;PaF106G0600023689.01;PaF106G0300011048.01;PaF106G0100002441.01;PaF106G0600025385.01;PaF106G0500020912.01;PaF106G0100000865.01;PaF106G0200010599.01;PaF106G0100004949.01;PaF106G0100005229.01
GO:0032989	cellular component morphogenesis	31	0.243612	0.664007	0.905769	0.983888	5049	PaF106G0600024841.01;PaF106G0800031242.01;PaF106G0800031477.01;PaF106G0300012566.01;PaF106G0300011240.01;PaF106G0400018179.01;PaF106G0500018967.01;PaF106G0200008575.01;PaF106G0800029477.01;PaF106G0100000510.01;PaF106G0800031792.01;PaF106G0500020982.01
GO:0009231	riboflavin biosynthetic process	11	-0.284612	-0.623885	0.907216	0.983888	6036	PaF106G0800031878.01;PaF106G0600023070.01;PaF106G0700025910.01;PaF106G0200008258.01;PaF106G0300012981.01;PaF106G0800032170.01
GO:0009416	response to light stimulus	71	-0.227066	-0.740712	0.907923	0.983888	4625	PaF106G0200009155.01;PaF106G0400015883.01;PaF106G0200008020.01;PaF106G0500018484.01;PaF106G0300013267.01;PaF106G0100004718.01;PaF106G0100004529.01;PaF106G0100003185.01;PaF106G0400017307.01;PaF106G0400018285.01;PaF106G0100005802.01;PaF106G0400017103.01;PaF106G0400017422.01;PaF106G0600021957.01;PaF106G0600024230.01;Prunus_sibirica_newGene_1959;PaF106G0600024242.01;PaF106G0600025694.01;PaF106G010000…
GO:0006096	glycolytic process	33	-0.243923	-0.689128	0.909465	0.983888	4303	PaF106G0800030669.01;PaF106G0400014632.01;PaF106G0600022850.01;PaF106G0700027741.01;PaF106G0100003790.01;PaF106G0100000316.01;PaF106G0700026522.01;PaF106G0600024315.01;PaF106G0200010617.01;PaF106G0500021017.01;PaF106G0100005904.01;PaF106G0200010362.01
GO:0045934	negative regulation of nucleobase-containing compound metabolic process	29	-0.247074	-0.673431	0.909474	0.983888	3246	PaF106G0800030127.01;PaF106G0100005405.01;PaF106G0400014772.01;PaF106G0800029665.01;PaF106G0100001998.01;PaF106G0100001994.01
GO:0051128	regulation of cellular component organization	48	-0.244324	-0.742795	0.910256	0.983888	6351	PaF106G0600024395.01;PaF106G0100003540.01;PaF106G0800029283.01;PaF106G0100000165.01;PaF106G0400015793.01;PaF106G0100001000.01;PaF106G0600023304.01;PaF106G0800030127.01;PaF106G0400016045.01;PaF106G0100006133.01;PaF106G0600023689.01;PaF106G0100000393.01;PaF106G0100002441.01;PaF106G0400015551.01;PaF106G0600024924.01;PaF106G0400015550.01;PaF106G0100002765.01;PaF106G0200010599.01
GO:0006535	cysteine biosynthetic process from serine	11	0.285026	0.622707	0.911025	0.983888	2183	PaF106G0200009036.01;PaF106G0600025564.01
GO:0006465	signal peptide processing	11	-0.281761	-0.617633	0.913402	0.983888	13948	PaF106G0200009925.01;PaF106G0200010502.01;PaF106G0100002778.01;PaF106G0100004618.01;PaF106G0700026269.01;PaF106G0100005259.01;PaF106G0300013668.01;PaF106G0600025444.01;PaF106G0100005970.01;PaF106G0600024790.01
GO:0007033	vacuole organization	17	0.262263	0.627666	0.915686	0.983888	2199	PaF106G0700027112.01;PaF106G0700027098.01
GO:0044703	multi-organism reproductive process	20	0.251023	0.624779	0.916168	0.983888	5828	PaF106G0800031477.01;PaF106G0400015769.01;PaF106G0500018967.01;PaF106G0600021767.01;PaF106G0200008034.01;PaF106G0400016868.01;PaF106G0100001555.01;PaF106G0800031479.01;PaF106G0500018683.01
GO:0009056	catabolic process	108	-0.221617	-0.772495	0.917355	0.983888	3577	PaF106G0800032140.01;PaF106G0100003185.01;PaF106G0400015745.01;PaF106G0100001801.01;PaF106G0100005731.01;PaF106G0600025339.01;PaF106G0400018443.01;PaF106G0600025385.01;PaF106G0700028100.01;PaF106G0500019462.01;PaF106G0800031496.01;PaF106G0500018662.01;PaF106G0500018541.01;PaF106G0300011178.01;PaF106G0800031136.01;PaF106G0600024829.01;PaF106G0300012225.01;PaF106G0600024640.01
GO:0008380	RNA splicing	28	-0.246295	-0.663498	0.91858	0.983888	5380	PaF106G0700026826.01;PaF106G0100006203.01;PaF106G0300011716.01;PaF106G0300013958.01;PaF106G0200008149.01;PaF106G0200007145.01;PaF106G0500020950.01;PaF106G0800029778.01
GO:0006506	GPI anchor biosynthetic process	21	0.248389	0.62485	0.918651	0.983888	14597	PaF106G0600023111.01;PaF106G0400014823.01;PaF106G0800030532.01;PaF106G0100002642.01;PaF106G0800032718.01;PaF106G0800030181.01;PaF106G0600021492.01;PaF106G0300013430.01;PaF106G0500018902.01;PaF106G0400016618.01;PaF106G0300011291.01;PaF106G0600023929.01;PaF106G0600021451.01;PaF106G0100001159.01;PaF106G0100002550.01;PaF106G0300014263.01;PaF106G0500019306.01;PaF106G0500020098.01;PaF106G0100005909.01;…
GO:0032956	regulation of actin cytoskeleton organization	10	-0.279428	-0.60152	0.919753	0.983888	931	PaF106G0100002765.01
GO:0016311	dephosphorylation	10	-0.278914	-0.600414	0.921811	0.983888	1397	PaF106G0400015349.01;PaF106G0700025949.01;Prunus_sibirica_newGene_1959
GO:0016043	cellular component organization	164	-0.219141	-0.813271	0.922607	0.983888	2507	PaF106G0100001998.01;PaF106G0200010116.01;PaF106G0600025385.01;PaF106G0800031267.01;PaF106G0200009186.01;PaF106G0200009236.01;PaF106G0100004031.01;PaF106G0800030287.01;PaF106G0500020162.01;PaF106G0500020912.01;PaF106G0400015550.01;PaF106G0100002765.01;PaF106G0200010599.01;PaF106G0100002999.01;PaF106G0400017245.01;PaF106G0100001994.01;PaF106G0500018649.01;PaF106G0300013611.01;PaF106G0700027029.01;…
GO:0006744	ubiquinone biosynthetic process	12	-0.274095	-0.619096	0.922764	0.983888	14097	PaF106G0300012563.01;PaF106G0300014609.01;PaF106G0400017314.01;PaF106G0200007919.01;PaF106G0500019806.01;PaF106G0100003442.01;PaF106G0100000948.01;PaF106G0100004090.01;PaF106G0100004092.01;PaF106G0400014799.01;PaF106G0600023034.01
GO:0071365	cellular response to auxin stimulus	10	0.279775	0.598304	0.926357	0.983888	4440	PaF106G0100005931.01;PaF106G0800029493.01;PaF106G0600023741.01
GO:0007623	circadian rhythm	22	0.25176	0.638006	0.927451	0.983888	325	PaF106G0200007333.01
GO:0051453	regulation of intracellular pH	12	0.279201	0.615447	0.927451	0.983888	3402	PaF106G0300013527.01;PaF106G0700026049.01;PaF106G0100005346.01
GO:0031347	regulation of defense response	31	0.232573	0.633918	0.928846	0.983888	4293	PaF106G0300014171.01;PaF106G0100002672.01;PaF106G0300013492.01;PaF106G0300012566.01;PaF106G0600023278.01;PaF106G0300011240.01;PaF106G0400017348.01;PaF106G0500021231.01;PaF106G0300012678.01;PaF106G0400015017.01
GO:0006623	protein targeting to vacuole	19	0.246157	0.60665	0.92955	0.983888	8451	PaF106G0600025386.01;PaF106G0300014273.01;PaF106G0700027675.01;PaF106G0500020824.01;PaF106G0100004883.01;PaF106G0100000141.01;PaF106G0700026863.01;PaF106G0300011482.01;PaF106G0800030873.01;PaF106G0600022583.01
GO:0043547	positive regulation of GTPase activity	19	0.246496	0.607487	0.92955	0.983888	4183	PaF106G0600024435.01;PaF106G0500021231.01;PaF106G0400015823.01;PaF106G0400018401.01;PaF106G0100003899.01;PaF106G0300012678.01
GO:0006644	phospholipid metabolic process	16	-0.251418	-0.612048	0.92986	0.983888	737	PaF106G0100004949.01
GO:0031324	negative regulation of cellular metabolic process	45	-0.231813	-0.695641	0.929897	0.983888	6181	PaF106G0600024366.01;PaF106G0100003617.01;PaF106G0500019197.01;PaF106G0800029325.01;PaF106G0100003227.01;PaF106G0200009351.01;PaF106G0700027031.01;PaF106G0600024395.01;PaF106G0300014574.01;PaF106G0500019240.01;PaF106G0300013832.01;PaF106G0300012523.01;PaF106G0600024910.01;PaF106G0800030127.01;PaF106G0800032140.01;PaF106G0100005405.01;PaF106G0400014772.01;PaF106G0800029665.01;PaF106G0400018285.01;…
GO:0006896	Golgi to vacuole transport	10	0.276195	0.590647	0.930233	0.983888	1718	Prunus_sibirica_newGene_610
GO:0040029	regulation of gene expression, epigenetic	15	0.260177	0.602049	0.931864	0.983888	3688	PaF106G0500021297.01;PaF106G0700026415.01;PaF106G0300013002.01
GO:0000902	cell morphogenesis	33	0.241201	0.664319	0.932171	0.983888	5067	PaF106G0600024841.01;PaF106G0800031242.01;PaF106G0300012566.01;PaF106G0300011240.01;PaF106G0400018179.01;PaF106G0800031418.01;PaF106G0500018967.01;PaF106G0800032298.01;PaF106G0200008575.01;PaF106G0800029477.01;PaF106G0100000510.01;PaF106G0800031792.01;PaF106G0500020982.01;PaF106G0600023819.01
GO:1901575	organic substance catabolic process	89	-0.220737	-0.746776	0.932238	0.983888	5091	PaF106G0800031657.01;PaF106G0100001661.01;PaF106G0300014484.01;PaF106G0800029757.01;PaF106G0300012078.01;PaF106G0500020657.01;PaF106G0500019461.01;PaF106G0300014353.01;PaF106G0100005730.01;PaF106G0100005082.01;PaF106G0800032140.01;PaF106G0400015745.01;PaF106G0100005731.01;PaF106G0600025339.01;PaF106G0400018443.01;PaF106G0700028100.01;PaF106G0500019462.01;PaF106G0500018662.01;PaF106G0500018541.01;…
GO:0032543	mitochondrial translation	13	-0.269296	-0.62155	0.93279	0.983888	8702	PaF106G0800032853.01;PaF106G0500020586.01;PaF106G0400015997.01;PaF106G0500019388.01;PaF106G0500021146.01;PaF106G0300012559.01;PaF106G0100005167.01
GO:0051172	negative regulation of nitrogen compound metabolic process	39	-0.240941	-0.697909	0.93456	0.983888	4625	PaF106G0600024910.01;PaF106G0800030127.01;PaF106G0800032140.01;PaF106G0100005405.01;PaF106G0400014772.01;PaF106G0800029665.01;PaF106G0100001998.01;PaF106G0100001994.01
GO:0006890	retrograde vesicle-mediated transport, Golgi to ER	26	-0.241434	-0.634688	0.935282	0.983888	7107	PaF106G0200008286.01;PaF106G0400017097.01;PaF106G0500019107.01;PaF106G0200008793.01;PaF106G0400017439.01;PaF106G0700027439.01;PaF106G0300013656.01;PaF106G0800030886.01;PaF106G0800031947.01;PaF106G0500018717.01
GO:0065009	regulation of molecular function	41	-0.234545	-0.686611	0.935551	0.983888	4869	PaF106G0300012078.01;PaF106G0600024910.01;PaF106G0400016045.01;PaF106G0300011048.01;PaF106G0800032140.01;PaF106G0100002441.01;PaF106G0400014772.01;PaF106G0300012679.01;PaF106G0300012225.01
GO:0042147	retrograde transport, endosome to Golgi	21	0.238166	0.599134	0.936508	0.983888	1920	Prunus_sibirica_newGene_610;PaF106G0100004276.01
GO:0022412	cellular process involved in reproduction in multicellular organism	12	-0.264625	-0.597705	0.936992	0.983888	714	PaF106G0800029757.01;PaF106G0400017245.01
GO:0034613	cellular protein localization	42	-0.228251	-0.669596	0.940206	0.983888	1041	PaF106G0100000544.01;PaF106G0400014991.01;PaF106G0200009867.01;PaF106G0800029283.01;PaF106G0400015793.01;PaF106G0100005714.01;PaF106G0400016045.01;PaF106G0600023689.01;PaF106G0300011048.01;PaF106G0100002441.01;PaF106G0600025385.01;PaF106G0100000865.01;PaF106G0100004949.01;PaF106G0100005229.01
GO:0010015	root morphogenesis	12	-0.256791	-0.580009	0.941057	0.983888	4967	PaF106G0300012405.01;PaF106G0200010457.01;PaF106G0100000005.01;PaF106G0500020831.01
GO:0070647	protein modification by small protein conjugation or removal	67	-0.217282	-0.701152	0.944563	0.983888	992	PaF106G0300013832.01;PaF106G0800029764.01;PaF106G0400015609.01;PaF106G0100005714.01;PaF106G0600022316.01;PaF106G0100002985.01;PaF106G0500020657.01;PaF106G0600023689.01;PaF106G0500019461.01;PaF106G0300013267.01;PaF106G0100004621.01;PaF106G0400015745.01;PaF106G0600025339.01;PaF106G0500019462.01;PaF106G0300011178.01;PaF106G0100000133.01;PaF106G0600024829.01;PaF106G0100000111.01
GO:0006163	purine nucleotide metabolic process	11	0.25929	0.56648	0.945841	0.983888	14383	PaF106G0800032434.01;PaF106G0200009620.01;PaF106G0500019916.01;PaF106G0100000024.01;PaF106G0600024429.01;PaF106G0300011043.01;PaF106G0100005854.01;PaF106G0500019373.01;PaF106G0400015310.01;PaF106G0200008519.01;PaF106G0500020147.01
GO:0019439	aromatic compound catabolic process	15	0.252755	0.584875	0.945892	0.983888	1989	Prunus_sibirica_newGene_1207;PaF106G0300012207.01
GO:0034655	nucleobase-containing compound catabolic process	15	0.252755	0.584875	0.945892	0.983888	1989	Prunus_sibirica_newGene_1207;PaF106G0300012207.01
GO:0044270	cellular nitrogen compound catabolic process	15	0.252755	0.584875	0.945892	0.983888	1989	Prunus_sibirica_newGene_1207;PaF106G0300012207.01
GO:0046700	heterocycle catabolic process	15	0.252755	0.584875	0.945892	0.983888	1989	Prunus_sibirica_newGene_1207;PaF106G0300012207.01
GO:1901361	organic cyclic compound catabolic process	15	0.252755	0.584875	0.945892	0.983888	1989	Prunus_sibirica_newGene_1207;PaF106G0300012207.01
GO:0048583	regulation of response to stimulus	88	-0.212836	-0.719158	0.946392	0.983888	5874	PaF106G0800029283.01;PaF106G0100004361.01;PaF106G0500019240.01;PaF106G0100003816.01;PaF106G0300013832.01;PaF106G0100005714.01;PaF106G0100001000.01;PaF106G0100002985.01;PaF106G0600023304.01;PaF106G0200009155.01;PaF106G0800029865.01;PaF106G0600023689.01;PaF106G0300013267.01;Prunus_sibirica_newGene_1840;PaF106G0700026675.01;PaF106G0100003185.01;PaF106G0100005405.01;PaF106G0100004621.01;PaF106G040001…
GO:0008104	protein localization	52	-0.216363	-0.673195	0.947034	0.983888	1041	PaF106G0600023689.01;PaF106G0300011048.01;PaF106G0400017012.01;PaF106G0700027022.01;PaF106G0100002441.01;PaF106G0600025385.01;PaF106G0100000865.01;PaF106G0200010599.01;PaF106G0100004949.01;PaF106G0100005229.01
GO:0051253	negative regulation of RNA metabolic process	26	-0.233494	-0.613814	0.947808	0.983888	4625	PaF106G0800030127.01;PaF106G0100005405.01;PaF106G0400014772.01;PaF106G0100001998.01;PaF106G0100001994.01
GO:1902679	negative regulation of RNA biosynthetic process	26	-0.233494	-0.613814	0.947808	0.983888	4625	PaF106G0800030127.01;PaF106G0100005405.01;PaF106G0400014772.01;PaF106G0100001998.01;PaF106G0100001994.01
GO:1903507	negative regulation of nucleic acid-templated transcription	26	-0.233494	-0.613814	0.947808	0.983888	4625	PaF106G0800030127.01;PaF106G0100005405.01;PaF106G0400014772.01;PaF106G0100001998.01;PaF106G0100001994.01
GO:0051129	negative regulation of cellular component organization	12	0.265658	0.585595	0.94902	0.983888	1791	PaF106G0500021297.01;PaF106G0200008518.01
GO:0051603	proteolysis involved in cellular protein catabolic process	77	0.207503	0.685381	0.951493	0.983888	4031	PaF106G0300011024.01;PaF106G0400017640.01;PaF106G0500020380.01;PaF106G0600021737.01;PaF106G0100005656.01;PaF106G0100003787.01;PaF106G0300011567.01;PaF106G0600025367.01;PaF106G0200009042.01;PaF106G0300012465.01;PaF106G0400017027.01;PaF106G0100001870.01;PaF106G0600022565.01;PaF106G0600023605.01;PaF106G0200009537.01;PaF106G0100003259.01
GO:0051865	protein autoubiquitination	10	0.262369	0.561079	0.95155	0.983888	14323	PaF106G0200007923.01;PaF106G0100001870.01;PaF106G0100001155.01;PaF106G0600025633.01;PaF106G0700025898.01;PaF106G0500021148.01;PaF106G0600024236.01;PaF106G0800029764.01;PaF106G0200006947.01;PaF106G0600022316.01
GO:0048609	multicellular organismal reproductive process	20	-0.228907	-0.58556	0.952096	0.983888	714	PaF106G0800029757.01;PaF106G0800030127.01;PaF106G0600023689.01;PaF106G0400017245.01
GO:0006730	one-carbon metabolic process	16	0.239489	0.56199	0.952286	0.983888	1896	PaF106G0800029454.01;PaF106G0100005850.01
GO:0090630	activation of GTPase activity	12	-0.249739	-0.564082	0.953252	0.983888	5635	PaF106G0200009625.01;PaF106G0400015793.01;PaF106G0800029918.01;PaF106G0200010725.01;PaF106G0400016045.01;PaF106G0100002441.01
GO:0000956	nuclear-transcribed mRNA catabolic process	20	0.229409	0.570984	0.954092	0.983888	6038	Prunus_sibirica_newGene_1207;PaF106G0300012207.01;PaF106G0800029423.01;PaF106G0100004330.01;PaF106G0600025586.01;PaF106G0400017771.01;PaF106G0600025565.01
GO:0044248	cellular catabolic process	97	-0.213903	-0.729869	0.955975	0.983888	5091	PaF106G0800031657.01;PaF106G0100001661.01;PaF106G0300014484.01;PaF106G0800029757.01;PaF106G0300012078.01;PaF106G0500020657.01;PaF106G0500019461.01;PaF106G0300014353.01;PaF106G0100005730.01;PaF106G0100005082.01;PaF106G0800032140.01;PaF106G0100003185.01;PaF106G0400015745.01;PaF106G0100005731.01;PaF106G0600025339.01;PaF106G0400018443.01;PaF106G0600025385.01;PaF106G0700028100.01;PaF106G0500019462.01;…
GO:0010243	response to organonitrogen compound	20	0.228264	0.568135	0.956088	0.983888	2060	PaF106G0300010980.01;PaF106G0400017937.01
GO:0006075	(1->3)-beta-D-glucan biosynthetic process	10	0.257564	0.550804	0.957364	0.983888	6320	PaF106G0300012501.01;PaF106G0200006820.01;PaF106G0500020338.01;PaF106G0300012987.01;PaF106G0400014915.01
GO:1902275	regulation of chromatin organization	14	0.245836	0.559473	0.957661	0.983888	3476	PaF106G0500021297.01;PaF106G0600023278.01;PaF106G0700026415.01
GO:0010305	leaf vascular tissue pattern formation	11	-0.247989	-0.543605	0.958763	0.983888	754	PaF106G0100001845.01;PaF106G0100000263.01;PaF106G0800029715.01
GO:0044092	negative regulation of molecular function	10	-0.24234	-0.521682	0.958848	0.983888	4533	PaF106G0200009351.01;PaF106G0600024910.01;PaF106G0300011048.01;PaF106G0800032140.01;PaF106G0400014772.01
GO:0051171	regulation of nitrogen compound metabolic process	176	0.207217	0.766937	0.961612	0.983888	4401	Prunus_sibirica_newGene_167;PaF106G0300011024.01;PaF106G0800030114.01;PaF106G0200006908.01;PaF106G0700027967.01;Prunus_sibirica_newGene_1207;PaF106G0100000058.01;PaF106G0500021297.01;PaF106G0300010980.01;PaF106G0800030376.01;PaF106G0100001999.01;PaF106G0600021737.01;PaF106G0500019963.01;PaF106G0300012207.01;PaF106G0800029541.01;PaF106G0100005656.01;PaF106G0100000914.01;PaF106G0700027485.01;PaF106…
GO:0031146	SCF-dependent proteasomal ubiquitin-dependent protein catabolic process	32	0.214225	0.58782	0.961686	0.983888	5578	PaF106G0200008115.01;PaF106G0400016715.01;PaF106G0600025367.01;PaF106G0700026745.01;PaF106G0600021914.01;PaF106G0700027761.01;PaF106G0100003942.01;PaF106G0500019888.01;PaF106G0800032577.01;PaF106G0100004121.01;PaF106G0100004309.01;PaF106G0600024284.01
GO:0048193	Golgi vesicle transport	16	0.232395	0.545343	0.962227	0.983888	5828	PaF106G0800031477.01;PaF106G0100001018.01;PaF106G0200008021.01;PaF106G0800029530.01;PaF106G0800031479.01;PaF106G0400015701.01;PaF106G0500018683.01
GO:0032446	protein modification by small protein conjugation	70	-0.20859	-0.679322	0.96383	0.983888	992	PaF106G0300013832.01;PaF106G0800029764.01;PaF106G0400015609.01;PaF106G0100005714.01;PaF106G0600022316.01;PaF106G0100002985.01;PaF106G0500020657.01;PaF106G0600023689.01;PaF106G0500019461.01;PaF106G0300013267.01;PaF106G0100004621.01;PaF106G0400015745.01;PaF106G0600025339.01;PaF106G0500019462.01;PaF106G0300011178.01;PaF106G0100000133.01;PaF106G0600024829.01;PaF106G0100000111.01
GO:0022613	ribonucleoprotein complex biogenesis	20	0.221454	0.551183	0.964072	0.983888	2966	Prunus_sibirica_newGene_1207;PaF106G0300012207.01;PaF106G0500019123.01
GO:2000113	negative regulation of cellular macromolecule biosynthetic process	25	-0.219275	-0.574468	0.96473	0.983888	2630	PaF106G0800030127.01;PaF106G0800029665.01;PaF106G0100001998.01;PaF106G0100001994.01
GO:0044260	cellular macromolecule metabolic process	191	-0.206815	-0.782196	0.965092	0.983888	3079	PaF106G0100002985.01;PaF106G0100002589.01;PaF106G0800031657.01;PaF106G0500020147.01;PaF106G0300012405.01;PaF106G0100001661.01;PaF106G0600023304.01;PaF106G0800029757.01;PaF106G0600025163.01;PaF106G0100002106.01;PaF106G0700027028.01;PaF106G0300012078.01;PaF106G0500020657.01;PaF106G0200009220.01;PaF106G0600023689.01;PaF106G0500019461.01;PaF106G0300013267.01;PaF106G0100005730.01;PaF106G0100005082.01;…
GO:0009628	response to abiotic stimulus	142	-0.20657	-0.743923	0.966527	0.983888	4523	PaF106G0800030127.01;PaF106G0200009155.01;PaF106G0100006133.01;PaF106G0400015883.01;PaF106G0200008020.01;PaF106G0600023689.01;PaF106G0300013267.01;PaF106G0100005545.01;PaF106G0200010345.01;PaF106G0600022526.01;PaF106G0300012694.01;PaF106G0100004529.01;PaF106G0700026675.01;PaF106G0100003185.01;PaF106G0400015745.01;PaF106G0100004232.01;PaF106G0400018079.01;PaF106G0400018285.01;Prunus_sibirica_newGe…
GO:0009832	plant-type cell wall biogenesis	11	0.243747	0.532522	0.967118	0.983888	4458	PaF106G0600024367.01;PaF106G0100006661.01;PaF106G0500020952.01
GO:0033043	regulation of organelle organization	37	-0.218629	-0.626496	0.96728	0.983888	5862	PaF106G0400015793.01;PaF106G0100001000.01;PaF106G0600023304.01;PaF106G0400016045.01;PaF106G0100006133.01;PaF106G0600023689.01;PaF106G0100002441.01;PaF106G0400015551.01;PaF106G0400015550.01;PaF106G0100002765.01;PaF106G0200010599.01
GO:0016226	iron-sulfur cluster assembly	16	-0.22492	-0.547543	0.967936	0.983888	15052	PaF106G0500019422.01;PaF106G0100000968.01;PaF106G0700027806.01;PaF106G0400018153.01;PaF106G0700027811.01;PaF106G0100006130.01;PaF106G0500020538.01;PaF106G0100003524.01;PaF106G0100006378.01;PaF106G0300014544.01;PaF106G0100004080.01;PaF106G0200007870.01;PaF106G0700027267.01;PaF106G0100006672.01;PaF106G0300011785.01
GO:0060627	regulation of vesicle-mediated transport	15	0.226363	0.523804	0.96994	0.983888	3487	PaF106G0200008518.01;PaF106G0600024435.01;PaF106G0500018967.01
GO:0044267	cellular protein metabolic process	144	-0.208375	-0.748188	0.969957	0.983888	3079	PaF106G0400015745.01;PaF106G0800029856.01;PaF106G0100005731.01;PaF106G0800029863.01;PaF106G0600025339.01;PaF106G0100001998.01;PaF106G0600025385.01;PaF106G0800031267.01;PaF106G0700028100.01;PaF106G0500019462.01;PaF106G0800030287.01;PaF106G0500020831.01;Prunus_sibirica_newGene_1959;PaF106G0300011178.01;PaF106G0100000133.01;PaF106G0600024829.01;PaF106G0100001994.01;PaF106G0500018649.01;PaF106G010000…
GO:0031349	positive regulation of defense response	10	0.240496	0.514305	0.97093	0.983888	4183	PaF106G0600023278.01;PaF106G0500021231.01;PaF106G0300012678.01
GO:0043603	cellular amide metabolic process	12	0.246858	0.544154	0.972549	0.983888	4670	PaF106G0500018620.01;PaF106G0800029453.01;PaF106G0100002888.01
GO:0061077	chaperone-mediated protein folding	11	-0.233077	-0.510917	0.973196	0.983888	8499	PaF106G0400015594.01;PaF106G0400015247.01;PaF106G0100001889.01;PaF106G0600024688.01;PaF106G0100001661.01;PaF106G0500021248.01;PaF106G0800030230.01
GO:0009553	embryo sac development	15	-0.212743	-0.50745	0.974155	0.983888	15288	PaF106G0700025945.01;PaF106G0700028098.01;PaF106G0600021513.01;PaF106G0600022414.01;PaF106G0100002757.01;PaF106G0300014051.01;PaF106G0200009867.01;PaF106G0600024234.01
GO:0043085	positive regulation of catalytic activity	24	0.21185	0.54626	0.97456	0.983888	4183	PaF106G0600024435.01;PaF106G0500021231.01;PaF106G0400015823.01;PaF106G0400018401.01;PaF106G0100003899.01;PaF106G0300012678.01
GO:0030150	protein import into mitochondrial matrix	10	0.234591	0.501676	0.974806	0.983888	14862	PaF106G0100001416.01;PaF106G0200009557.01;PaF106G0100002151.01;PaF106G0800029886.01;PaF106G0500020156.01;PaF106G0400015349.01;PaF106G0100002102.01;PaF106G0800030038.01;PaF106G0100004130.01;PaF106G0400015592.01
GO:0032879	regulation of localization	25	0.20296	0.530135	0.975	0.983888	4797	PaF106G0600024874.01;PaF106G0200008518.01;PaF106G0600024435.01;PaF106G0500018967.01;PaF106G0400015823.01;PaF106G0800029530.01;PaF106G0200007329.01
GO:0050794	regulation of cellular process	302	0.205815	0.809951	0.975048	0.983888	4513	PaF106G0800030462.01;PaF106G0100001269.01;PaF106G0400016036.01;Prunus_sibirica_newGene_167;PaF106G0800030114.01;PaF106G0100001268.01;PaF106G0400018009.01;PaF106G0200006908.01;PaF106G0700028154.01;PaF106G0700027967.01;Prunus_sibirica_newGene_1207;PaF106G0100000058.01;PaF106G0100005931.01;PaF106G0500021297.01;PaF106G0100002938.01;PaF106G0300010980.01;PaF106G0800030376.01;PaF106G0100001999.01;PaF106…
GO:0009791	post-embryonic development	93	-0.203807	-0.693108	0.975155	0.983888	4967	PaF106G0400017298.01;PaF106G0800029757.01;PaF106G0200010457.01;PaF106G0800030127.01;PaF106G0200009155.01;PaF106G0100006270.01;PaF106G0600023689.01;PaF106G0100003918.01;PaF106G0300012622.01;PaF106G0600022421.01;PaF106G0500021073.01;PaF106G0100003185.01;PaF106G0700026051.01;PaF106G0600022713.01;PaF106G0400015551.01;PaF106G0600023607.01;PaF106G0100001840.01;PaF106G0100001998.01;PaF106G0400016714.01;…
GO:0048278	vesicle docking	12	-0.229619	-0.518637	0.97561	0.983888	7406	PaF106G0300010913.01;PaF106G0700027237.01;PaF106G0700026429.01;PaF106G0800031453.01;PaF106G0700029269.01
GO:0006487	protein N-linked glycosylation	17	0.221632	0.530426	0.976471	0.983888	15115	PaF106G0600024557.01;PaF106G0300011151.01;PaF106G0700026199.01;PaF106G0600024387.01;PaF106G0100002982.01;PaF106G0100006501.01;PaF106G0200009801.01;PaF106G0800029905.01;PaF106G0100002308.01;PaF106G0700026645.01;PaF106G0200009996.01;PaF106G0200008910.01;PaF106G0100002782.01;PaF106G0200008319.01;PaF106G0400015533.01;PaF106G0400016271.01;PaF106G0600025837.01
GO:0000398	mRNA splicing, via spliceosome	78	-0.206268	-0.683559	0.976793	0.983888	87	PaF106G0700025944.01;PaF106G0600024183.01;PaF106G0100006736.01;PaF106G0100002256.01;PaF106G0600022063.01;PaF106G0100002561.01;PaF106G0800031157.01;Prunus_sibirica_newGene_21;PaF106G0100001012.01;PaF106G0300012913.01;PaF106G0100002819.01;PaF106G0100004911.01;PaF106G0600025306.01;PaF106G0100000574.01;PaF106G0100004223.01;PaF106G0200009274.01;PaF106G0600024347.01;PaF106G0400015128.01;PaF106G07000277…
GO:0015833	peptide transport	28	-0.21407	-0.576686	0.977035	0.983888	1041	PaF106G0400014991.01;PaF106G0800029283.01;PaF106G0400015793.01;PaF106G0400016045.01;PaF106G0300011048.01;PaF106G0100002441.01;PaF106G0100000865.01;PaF106G0200010599.01
GO:0042886	amide transport	28	-0.21407	-0.576686	0.977035	0.983888	1041	PaF106G0400014991.01;PaF106G0800029283.01;PaF106G0400015793.01;PaF106G0400016045.01;PaF106G0300011048.01;PaF106G0100002441.01;PaF106G0100000865.01;PaF106G0200010599.01
GO:0051336	regulation of hydrolase activity	25	-0.206766	-0.541697	0.977178	0.983888	4730	PaF106G0600024910.01;PaF106G0400016045.01;PaF106G0800032140.01;PaF106G0100002441.01;PaF106G0400014772.01;PaF106G0300012679.01
GO:0044265	cellular macromolecule catabolic process	74	0.198339	0.647485	0.977273	0.983888	4031	PaF106G0300011024.01;Prunus_sibirica_newGene_1207;PaF106G0600021737.01;PaF106G0300012207.01;PaF106G0100005656.01;PaF106G0100003787.01;PaF106G0300011567.01;PaF106G0600025367.01;PaF106G0200009042.01;PaF106G0300012465.01;PaF106G0400017027.01;PaF106G0100001870.01;PaF106G0600022565.01;PaF106G0100003259.01
GO:0009890	negative regulation of biosynthetic process	35	-0.201126	-0.576801	0.977551	0.983888	3246	PaF106G0600024366.01;PaF106G0100003617.01;PaF106G0500019197.01;PaF106G0800029325.01;PaF106G0100003227.01;PaF106G0200009351.01;PaF106G0700027031.01;PaF106G0500019240.01;PaF106G0300013832.01;PaF106G0300012523.01;PaF106G0800030127.01;PaF106G0100005405.01;PaF106G0400014772.01;PaF106G0800029665.01;PaF106G0100001998.01;PaF106G0100001994.01
GO:0048438	floral whorl development	14	0.218299	0.496805	0.977823	0.983888	15179	PaF106G0700027485.01;PaF106G0400017292.01;PaF106G0800029493.01;PaF106G0800030182.01;PaF106G0800030633.01;PaF106G0200009923.01;PaF106G0700027742.01;PaF106G0300011426.01;PaF106G0300010949.01;PaF106G0700027172.01;PaF106G0100004361.01;PaF106G0800032714.01;PaF106G0400017298.01;PaF106G0600023689.01
GO:0030433	ubiquitin-dependent ERAD pathway	21	-0.204919	-0.529645	0.977912	0.983888	15441	PaF106G0600022650.01;PaF106G0700028084.01;PaF106G0400015722.01;PaF106G0400015720.01;PaF106G0400018082.01;PaF106G0200008371.01;PaF106G0400015745.01
GO:0007005	mitochondrion organization	16	-0.205461	-0.500172	0.977956	0.983888	6212	PaF106G0200009609.01;PaF106G0500020147.01;PaF106G0600025290.01;PaF106G0600025385.01
GO:0009314	response to radiation	46	0.21087	0.626077	0.978304	0.983888	1103	PaF106G0800029443.01;PaF106G0400016573.01;PaF106G0700027967.01;PaF106G0100000058.01
GO:0044257	cellular protein catabolic process	60	0.209016	0.652051	0.978887	0.983888	4348	PaF106G0300011024.01;PaF106G0600021737.01;PaF106G0100005656.01;PaF106G0100003787.01;PaF106G0300011567.01;PaF106G0600025367.01;PaF106G0200009042.01;PaF106G0300012465.01;PaF106G0400017027.01;PaF106G0100001870.01;PaF106G0600022565.01;PaF106G0100003259.01;PaF106G0100003942.01
GO:0010605	negative regulation of macromolecule metabolic process	55	-0.201602	-0.635105	0.978992	0.983888	4890	PaF106G0600023304.01;PaF106G0300012523.01;PaF106G0600024910.01;PaF106G0800030127.01;PaF106G0100006133.01;PaF106G0800032140.01;PaF106G0100005405.01;PaF106G0400014772.01;PaF106G0800029665.01;PaF106G0400018443.01;PaF106G0100001998.01;PaF106G0600024953.01;PaF106G0500018662.01;PaF106G0100001994.01
GO:1901565	organonitrogen compound catabolic process	64	-0.198962	-0.64113	0.978992	0.983888	5091	PaF106G0800031657.01;PaF106G0100001661.01;PaF106G0800029757.01;PaF106G0300012078.01;PaF106G0500020657.01;PaF106G0500019461.01;PaF106G0100005730.01;PaF106G0400015745.01;PaF106G0100005731.01;PaF106G0600025339.01;PaF106G0700028100.01;PaF106G0500019462.01;PaF106G0300011178.01;PaF106G0600024829.01;PaF106G0300012225.01
GO:0050789	regulation of biological process	338	0.200921	0.800446	0.979048	0.983888	4513	PaF106G0800030462.01;PaF106G0100001269.01;PaF106G0400016036.01;Prunus_sibirica_newGene_167;PaF106G0300011024.01;PaF106G0800030114.01;PaF106G0100001268.01;PaF106G0400018009.01;PaF106G0200006908.01;PaF106G0600024874.01;PaF106G0700028154.01;PaF106G0700027967.01;Prunus_sibirica_newGene_1207;PaF106G0100000058.01;PaF106G0100005931.01;PaF106G0500021297.01;PaF106G0100002938.01;PaF106G0300010980.01;PaF106…
GO:0023051	regulation of signaling	55	0.206436	0.636509	0.979087	0.983888	4513	PaF106G0100002938.01;PaF106G0500020189.01;PaF106G0100003787.01;Prunus_sibirica_newGene_122;PaF106G0100001587.01;PaF106G0300011240.01;PaF106G0300012465.01;PaF106G0400017027.01;PaF106G0500018967.01;PaF106G0400018401.01;PaF106G0100003899.01;PaF106G0200009240.01;PaF106G0700028381.01;PaF106G0300012678.01;PaF106G0200008034.01;PaF106G0800029530.01;PaF106G0400016868.01;PaF106G0100004186.01
GO:0031327	negative regulation of cellular biosynthetic process	34	-0.205814	-0.580402	0.979167	0.983888	3246	PaF106G0600024366.01;PaF106G0100003617.01;PaF106G0500019197.01;PaF106G0100003227.01;PaF106G0200009351.01;PaF106G0700027031.01;PaF106G0500019240.01;PaF106G0300013832.01;PaF106G0300012523.01;PaF106G0800030127.01;PaF106G0100005405.01;PaF106G0400014772.01;PaF106G0800029665.01;PaF106G0100001998.01;PaF106G0100001994.01
GO:0016458	gene silencing	10	-0.219875	-0.473322	0.979424	0.983888	1964	PaF106G0500019197.01;PaF106G0600023304.01;PaF106G0600024953.01
GO:0009892	negative regulation of metabolic process	64	-0.194476	-0.626672	0.981092	0.983888	6181	PaF106G0600024395.01;PaF106G0300014574.01;PaF106G0500019240.01;PaF106G0100000165.01;PaF106G0300013832.01;PaF106G0100001000.01;PaF106G0600023304.01;PaF106G0300012523.01;PaF106G0600024910.01;PaF106G0800030127.01;PaF106G0100006133.01;PaF106G0800032140.01;PaF106G0100005405.01;PaF106G0400014772.01;PaF106G0800029665.01;PaF106G0400018285.01;PaF106G0400018443.01;PaF106G0100001998.01;PaF106G0600024953.01;…
GO:0006515	misfolded or incompletely synthesized protein catabolic process	11	-0.221048	-0.484549	0.981443	0.983888	15126	PaF106G0800030247.01;PaF106G0200007258.01;PaF106G0700028160.01;PaF106G0100004104.01;PaF106G0700026069.01;PaF106G0500019078.01;PaF106G0600025605.01;PaF106G0500019443.01;PaF106G0800030878.01;PaF106G0600025290.01
GO:0034976	response to endoplasmic reticulum stress	14	-0.206546	-0.483448	0.982213	0.983888	15408	PaF106G0600022514.01;PaF106G0100005760.01;PaF106G0100006110.01;PaF106G0700028160.01;PaF106G0600022401.01;PaF106G0200007021.01;PaF106G0100005722.01;PaF106G0700026053.01;PaF106G0700026069.01;PaF106G0100002257.01;PaF106G0300013829.01;PaF106G0100001661.01;PaF106G0400015745.01
GO:0051049	regulation of transport	23	0.210058	0.539748	0.982726	0.983888	4382	PaF106G0600024874.01;PaF106G0200008518.01;PaF106G0600024435.01;PaF106G0500018967.01;PaF106G0400015823.01;PaF106G0800029530.01
GO:0044093	positive regulation of molecular function	28	0.194647	0.520007	0.982792	0.983888	4382	PaF106G0600024435.01;PaF106G0500021231.01;PaF106G0400015823.01;PaF106G0400018401.01;PaF106G0100003899.01;PaF106G0300012678.01;PaF106G0800029530.01
GO:0045184	establishment of protein localization	31	-0.200391	-0.555004	0.983402	0.983888	1041	PaF106G0300011048.01;PaF106G0100002441.01;PaF106G0100000865.01;PaF106G0200010599.01
GO:0006906	vesicle fusion	14	-0.204021	-0.477536	0.98419	0.983888	15457	PaF106G0300010913.01;PaF106G0700027237.01;PaF106G0700026429.01;PaF106G0800031453.01;PaF106G0700029269.01
GO:0019222	regulation of metabolic process	204	0.192651	0.723817	0.984221	0.983888	4401	PaF106G0400016036.01;Prunus_sibirica_newGene_167;PaF106G0300011024.01;PaF106G0800030114.01;PaF106G0200006908.01;PaF106G0700027967.01;Prunus_sibirica_newGene_1207;PaF106G0100000058.01;PaF106G0500021297.01;PaF106G0300010980.01;PaF106G0800030376.01;PaF106G0100001999.01;PaF106G0600021737.01;PaF106G0500019963.01;PaF106G0300012207.01;PaF106G0800029541.01;PaF106G0100005656.01;PaF106G0100000914.01;PaF106…
GO:0018105	peptidyl-serine phosphorylation	34	-0.200055	-0.564161	0.985417	0.983888	324	PaF106G0400018143.01;PaF106G0700026451.01;PaF106G0500019164.01;PaF106G0100000013.01
GO:1903506	regulation of nucleic acid-templated transcription	121	-0.196131	-0.693491	0.985507	0.983888	3355	PaF106G0100001652.01;Prunus_sibirica_newGene_650;PaF106G0400017298.01;PaF106G0600023304.01;PaF106G0300012523.01;PaF106G0800030127.01;PaF106G0200009220.01;Prunus_sibirica_newGene_839;PaF106G0500019142.01;Prunus_sibirica_newGene_1840;PaF106G0800032526.01;PaF106G0100000970.01;PaF106G0700026675.01;PaF106G0100005405.01;PaF106G0800031911.01;PaF106G0400014772.01;PaF106G0400015551.01;PaF106G0800029856.01…
GO:2001141	regulation of RNA biosynthetic process	121	-0.196131	-0.693491	0.985507	0.983888	3355	PaF106G0100001652.01;Prunus_sibirica_newGene_650;PaF106G0400017298.01;PaF106G0600023304.01;PaF106G0300012523.01;PaF106G0800030127.01;PaF106G0200009220.01;Prunus_sibirica_newGene_839;PaF106G0500019142.01;Prunus_sibirica_newGene_1840;PaF106G0800032526.01;PaF106G0100000970.01;PaF106G0700026675.01;PaF106G0100005405.01;PaF106G0800031911.01;PaF106G0400014772.01;PaF106G0400015551.01;PaF106G0800029856.01…
GO:0071840	cellular component organization or biogenesis	184	-0.196482	-0.739953	0.985597	0.983888	2507	PaF106G0800031911.01;PaF106G0800029759.01;PaF106G0100003386.01;PaF106G0400015551.01;PaF106G0800029863.01;PaF106G0200007263.01;PaF106G0400018443.01;PaF106G0100001998.01;PaF106G0200010116.01;PaF106G0600025385.01;PaF106G0800031267.01;PaF106G0200009186.01;PaF106G0200009236.01;PaF106G0100004031.01;PaF106G0800030287.01;PaF106G0500020162.01;PaF106G0500020912.01;PaF106G0400015550.01;PaF106G0100002765.01;…
GO:0006470	protein dephosphorylation	17	0.194658	0.465868	0.986275	0.983888	5428	PaF106G0700028755.01;PaF106G0100002845.01;PaF106G0700028744.01;PaF106G0300011539.01;PaF106G0100001764.01;PaF106G0700027622.01
GO:0009057	macromolecule catabolic process	76	0.191408	0.627173	0.986792	0.983888	4031	PaF106G0300011024.01;Prunus_sibirica_newGene_1207;PaF106G0600021737.01;PaF106G0300012207.01;PaF106G0100005656.01;PaF106G0100003787.01;PaF106G0300011567.01;PaF106G0600025367.01;PaF106G0200009042.01;PaF106G0300012465.01;PaF106G0400017027.01;PaF106G0100001870.01;PaF106G0600022565.01;PaF106G0100003259.01
GO:0006396	RNA processing	112	-0.197815	-0.693035	0.987578	0.983888	3739	PaF106G0500019077.01;PaF106G0700028424.01;PaF106G0100006755.01;PaF106G0600022421.01;PaF106G0600025626.01;PaF106G0800029759.01;PaF106G0300011381.01;PaF106G0600022713.01;PaF106G0200007145.01;PaF106G0700028470.01;PaF106G0500020688.01;PaF106G0400018443.01;PaF106G0400015644.01;PaF106G0600024953.01;PaF106G0500020950.01;PaF106G0400015635.01;PaF106G0600022725.01;PaF106G0600023832.01;PaF106G0300012067.01;…
GO:0015986	ATP synthesis coupled proton transport	19	0.195849	0.482668	0.988258	0.983888	2413	PaF106G0300014017.01;PaF106G0500019074.01
GO:0002098	tRNA wobble uridine modification	11	0.210483	0.45985	0.988395	0.983888	15330	PaF106G0100000882.01;PaF106G0100005110.01;PaF106G0100003400.01;PaF106G0200009746.01;PaF106G0800031252.01;PaF106G0100005898.01;PaF106G0100004205.01;PaF106G0300012896.01;PaF106G0500018478.01;PaF106G0700028425.01;PaF106G0200009622.01
GO:0032504	multicellular organism reproduction	23	-0.188438	-0.489583	0.989605	0.983888	714	PaF106G0300013832.01;PaF106G0800029757.01;PaF106G0800030127.01;PaF106G0600023689.01;PaF106G0400017245.01
GO:0048585	negative regulation of response to stimulus	38	-0.187838	-0.542505	0.989858	0.983888	5874	PaF106G0800029283.01;PaF106G0300013832.01;PaF106G0100005714.01;PaF106G0200009155.01;PaF106G0800029865.01;PaF106G0600023689.01;Prunus_sibirica_newGene_1840;PaF106G0700026675.01;PaF106G0100003185.01;PaF106G0100004621.01;PaF106G0200007263.01;PaF106G0700028100.01;PaF106G0100004719.01
GO:0010029	regulation of seed germination	13	0.216605	0.486571	0.990215	0.983888	3940	PaF106G0100002674.01;PaF106G0600022008.01;PaF106G0800030951.01
GO:0006486	protein glycosylation	75	0.187531	0.612936	0.990512	0.983888	4539	PaF106G0600023791.01;Prunus_sibirica_newGene_669;PaF106G0600023790.01;PaF106G0100001026.01;PaF106G0700029033.01;PaF106G0800032880.01;PaF106G0100002616.01;PaF106G0100001916.01;PaF106G0400015695.01;PaF106G0600025804.01;PaF106G0600022253.01;PaF106G0500020188.01;PaF106G0100003302.01;PaF106G0600024012.01;PaF106G0200008059.01;PaF106G0500020649.01;PaF106G0100001919.01;PaF106G0100005838.01
GO:0015979	photosynthesis	50	0.185758	0.563682	0.990654	0.983888	5262	PaF106G0800030825.01;PaF106G0500020368.01;PaF106G0100002914.01;PaF106G0800032531.01;PaF106G0200006942.01;PaF106G0100005397.01;PaF106G0700028945.01;PaF106G0600025819.01;PaF106G0600025233.01;PaF106G0300012910.01;PaF106G0400014900.01;PaF106G0400015717.01;PaF106G0400018007.01;PaF106G0700026717.01;PaF106G0100003704.01;PaF106G0700029015.01;PaF106G0300013834.01
GO:0009555	pollen development	43	-0.187	-0.551292	0.991753	0.983888	2563	PaF106G0100004361.01;PaF106G0200006880.01;PaF106G0500018625.01;PaF106G0200008811.01;PaF106G0800029757.01;PaF106G0600023689.01;PaF106G0800032140.01;PaF106G0600025859.01;PaF106G0100005952.01;PaF106G0100005958.01;PaF106G0200010599.01;PaF106G0400017245.01
GO:2000112	regulation of cellular macromolecule biosynthetic process	125	-0.188682	-0.670153	0.991803	0.983888	5160	PaF106G0100000752.01;PaF106G0100001652.01;Prunus_sibirica_newGene_650;PaF106G0400017298.01;PaF106G0600023304.01;PaF106G0400017939.01;PaF106G0300012523.01;PaF106G0800030127.01;PaF106G0200009220.01;Prunus_sibirica_newGene_839;PaF106G0500019142.01;Prunus_sibirica_newGene_1840;PaF106G0800032526.01;PaF106G0100000970.01;PaF106G0700026675.01;PaF106G0800031911.01;PaF106G0400014772.01;PaF106G0400015551.01…
GO:0006612	protein targeting to membrane	14	0.18906	0.430262	0.991935	0.983888	6518	PaF106G0700028983.01;PaF106G0800031630.01;PaF106G0200009469.01;PaF106G0700027675.01;PaF106G0600024601.01;PaF106G0100004082.01
GO:0001510	RNA methylation	10	0.226087	0.483491	0.992248	0.983888	15027	PaF106G0100003400.01;PaF106G0100004782.01;PaF106G0300012274.01;PaF106G0800031458.01;PaF106G0600024746.01;PaF106G0100005070.01;PaF106G0200009825.01;PaF106G0300013413.01;PaF106G0300012482.01;PaF106G0800032427.01
GO:0016579	protein deubiquitination	43	0.180467	0.533154	0.992263	0.983888	5655	Prunus_sibirica_newGene_1558;PaF106G0600024727.01;PaF106G0100004712.01;PaF106G0400016488.01;PaF106G0600022085.01;PaF106G0200007734.01;PaF106G0400018324.01;PaF106G0600024455.01;PaF106G0700028077.01;PaF106G0500020068.01
GO:0010646	regulation of cell communication	57	0.192325	0.59574	0.992395	0.983888	4513	PaF106G0100002938.01;PaF106G0500020189.01;PaF106G0100003787.01;Prunus_sibirica_newGene_122;PaF106G0100001587.01;PaF106G0300011240.01;PaF106G0300012465.01;PaF106G0400017027.01;PaF106G0500018967.01;PaF106G0400018401.01;PaF106G0100003899.01;PaF106G0200009240.01;PaF106G0700028381.01;PaF106G0300012678.01;PaF106G0200008034.01;PaF106G0800029530.01;PaF106G0400016868.01;PaF106G0100004186.01
GO:0006810	transport	66	-0.182959	-0.589662	0.993658	0.983888	1477	PaF106G0100000854.01;PaF106G0200008020.01;PaF106G0500019142.01;PaF106G0300013267.01;PaF106G0300011048.01;PaF106G0100003386.01;PaF106G0100002441.01;PaF106G0600024737.01;PaF106G0100000865.01;PaF106G0200010599.01;PaF106G0300012269.01;PaF106G0300012271.01
GO:0000003	reproduction	96	-0.179174	-0.611308	0.99375	0.983888	1670	PaF106G0400017298.01;PaF106G0800029757.01;PaF106G0100002106.01;PaF106G0800030127.01;PaF106G0200009155.01;PaF106G0100006270.01;PaF106G0600023689.01;PaF106G0100003918.01;PaF106G0500021073.01;PaF106G0700026051.01;PaF106G0600024234.01;PaF106G0400015551.01;PaF106G0600023607.01;PaF106G0100001840.01;PaF106G0600024526.01;PaF106G0600024737.01;PaF106G0400015550.01;PaF106G0100002999.01;PaF106G0400017245.01;…
GO:0022414	reproductive process	93	-0.183337	-0.623494	0.993789	0.983888	1670	PaF106G0400017298.01;PaF106G0800029757.01;PaF106G0100002106.01;PaF106G0800030127.01;PaF106G0200009155.01;PaF106G0100006270.01;PaF106G0600023689.01;PaF106G0100003918.01;PaF106G0500021073.01;PaF106G0700026051.01;PaF106G0600024234.01;PaF106G0400015551.01;PaF106G0600023607.01;PaF106G0100001840.01;PaF106G0600024526.01;PaF106G0600024737.01;PaF106G0400015550.01;PaF106G0100002999.01;PaF106G0400017245.01;…
GO:0000422	autophagy of mitochondrion	11	-0.181158	-0.397107	0.993814	0.983888	15900	PaF106G0400015106.01;PaF106G0600025385.01
GO:0006891	intra-Golgi vesicle-mediated transport	24	-0.169778	-0.444597	0.99389	0.983888	16123	PaF106G0800031337.01;PaF106G0300014418.01;PaF106G0100003345.01;PaF106G0200008286.01;PaF106G0400017097.01;PaF106G0100000891.01;PaF106G0800031415.01;PaF106G0400017439.01;PaF106G0100006654.01;PaF106G0300013656.01;PaF106G0700028946.01
GO:0019941	modification-dependent protein catabolic process	63	0.189171	0.597576	0.994318	0.983888	4031	PaF106G0300011024.01;PaF106G0600021737.01;PaF106G0100005656.01;PaF106G0100003787.01;PaF106G0300011567.01;PaF106G0600025367.01;PaF106G0200009042.01;PaF106G0300012465.01;PaF106G0400017027.01;PaF106G0100001870.01;PaF106G0600022565.01;PaF106G0400018188.01;PaF106G0100003259.01
GO:0051641	cellular localization	49	-0.182351	-0.557587	0.995717	0.983888	6406	PaF106G0400014991.01;PaF106G0200009867.01;PaF106G0800029283.01;PaF106G0400015793.01;PaF106G0300014275.01;PaF106G0200010088.01;PaF106G0100005714.01;PaF106G0400016045.01;PaF106G0600023689.01;PaF106G0300011048.01;PaF106G0600024981.01;PaF106G0100002441.01;PaF106G0600025385.01;PaF106G0500020912.01;PaF106G0100000865.01;PaF106G0100004949.01;PaF106G0100005229.01
GO:0071705	nitrogen compound transport	30	-0.190904	-0.524972	0.995781	0.983888	1041	PaF106G0400014991.01;PaF106G0800029283.01;PaF106G0400015793.01;PaF106G0100003420.01;PaF106G0400016045.01;PaF106G0300011048.01;PaF106G0100002441.01;PaF106G0100000865.01;PaF106G0200010599.01
GO:0010556	regulation of macromolecule biosynthetic process	128	-0.192586	-0.682195	0.995807	0.983888	5160	PaF106G0100000752.01;PaF106G0100001652.01;Prunus_sibirica_newGene_650;PaF106G0400017298.01;PaF106G0600023304.01;PaF106G0400017939.01;PaF106G0300012523.01;PaF106G0800030127.01;PaF106G0200009220.01;Prunus_sibirica_newGene_839;PaF106G0500019142.01;Prunus_sibirica_newGene_1840;PaF106G0800032526.01;PaF106G0100000970.01;PaF106G0700026675.01;PaF106G0100005405.01;PaF106G0800031911.01;PaF106G0400014772.01…
GO:0006289	nucleotide-excision repair	26	-0.169692	-0.44609	0.995825	0.983888	5951	PaF106G0600024236.01;PaF106G0100005771.01;PaF106G0100003684.01;PaF106G0500019440.01;PaF106G0400017818.01;PaF106G0100003680.01;PaF106G0300013586.01;PaF106G0100005353.01
GO:0009409	response to cold	45	-0.167884	-0.503801	0.995876	0.983888	5210	PaF106G0100002589.01;PaF106G0100006126.01;PaF106G0300013998.01;PaF106G0200010527.01;PaF106G0100006133.01;PaF106G0100004718.01;PaF106G0600022057.01;PaF106G0400018079.01;PaF106G0400018285.01;PaF106G0600022105.01;PaF106G0200008710.01;PaF106G0800032376.01
GO:0018230	peptidyl-L-cysteine S-palmitoylation	11	-0.173857	-0.381104	0.995876	0.983888	5778	PaF106G0200008694.01;PaF106G0200009305.01;PaF106G0500018527.01
GO:0010629	negative regulation of gene expression	44	-0.168546	-0.501206	0.995893	0.983888	2461	PaF106G0100001998.01;PaF106G0600024953.01;PaF106G0500018662.01;PaF106G0100001994.01
GO:0070925	organelle assembly	13	-0.170397	-0.393285	0.995927	0.983888	5595	PaF106G0400018273.01;PaF106G0300014275.01;PaF106G0300012078.01;PaF106G0800029865.01;PaF106G0600025385.01
GO:0006635	fatty acid beta-oxidation	15	0.174133	0.402943	0.995992	0.983888	16036	PaF106G0300013125.01;PaF106G0600025424.01;PaF106G0500019244.01;PaF106G0700026348.01;PaF106G0200009752.01;PaF106G0600024823.01;PaF106G0100001532.01;PaF106G0100004209.01;PaF106G0800030090.01;PaF106G0100004763.01;PaF106G0300012229.01;PaF106G0100005081.01;PaF106G0300013860.01;PaF106G0700028345.01;PaF106G0100001787.01
GO:0065007	biological regulation	363	0.185124	0.739278	0.996016	0.983888	2736	PaF106G0800030462.01;PaF106G0100001269.01;PaF106G0400016036.01;Prunus_sibirica_newGene_167;PaF106G0300011024.01;PaF106G0800030114.01;PaF106G0100001268.01;PaF106G0400018009.01;PaF106G0200006908.01;PaF106G0600024874.01;PaF106G0700028154.01;PaF106G0700027967.01;Prunus_sibirica_newGene_1207;PaF106G0100000058.01;PaF106G0100005931.01;PaF106G0500021297.01;PaF106G0100000204.01;PaF106G0100002938.01;PaF106…
GO:0019538	protein metabolic process	152	0.184999	0.666297	0.99604	0.983888	5274	PaF106G0100001269.01;Prunus_sibirica_newGene_167;PaF106G0300011024.01;PaF106G0100001268.01;PaF106G0600024874.01;PaF106G0100002938.01;PaF106G0300010980.01;PaF106G0100001999.01;PaF106G0600021737.01;PaF106G0400018014.01;PaF106G0100005656.01;PaF106G0100003787.01;PaF106G0100001274.01;PaF106G0300011567.01;PaF106G0100005474.01;PaF106G0600025367.01;PaF106G0200009042.01;PaF106G0400015808.01;PaF106G0300012…
GO:0009817	defense response to fungus, incompatible interaction	12	0.191466	0.422051	0.996078	0.983888	3886	PaF106G0300012465.01;PaF106G0400017027.01;PaF106G0800029453.01
GO:0007034	vacuolar transport	10	0.206278	0.441129	0.996124	0.983888	6665	PaF106G0600025386.01;PaF106G0200009452.01;PaF106G0700026712.01;PaF106G0100000853.01;PaF106G0300014606.01
GO:0006996	organelle organization	113	0.18465	0.639923	0.996139	0.983888	4128	Prunus_sibirica_newGene_167;PaF106G0200010593.01;PaF106G0300013257.01;PaF106G0600024398.01;PaF106G0100000058.01;PaF106G0700027112.01;PaF106G0100001999.01;PaF106G0800031477.01;PaF106G0800029430.01;PaF106G0700027098.01;PaF106G0100000725.01;PaF106G0100004041.01;PaF106G0300011240.01;PaF106G0200008021.01;PaF106G0100001416.01;PaF106G0400018404.01;PaF106G0400015823.01;PaF106G0800032787.01;PaF106G0200009…
GO:0009966	regulation of signal transduction	58	0.182867	0.567543	0.996169	0.983888	4513	PaF106G0100002938.01;PaF106G0500020189.01;PaF106G0100003787.01;Prunus_sibirica_newGene_122;PaF106G0100001587.01;PaF106G0300011240.01;PaF106G0300012465.01;PaF106G0400017027.01;PaF106G0500018967.01;PaF106G0400018401.01;PaF106G0100003899.01;PaF106G0200009240.01;PaF106G0700028381.01;PaF106G0300012678.01;PaF106G0200008034.01;PaF106G0400016868.01;PaF106G0100004186.01
GO:0009737	response to abscisic acid	67	0.183789	0.589299	0.996248	0.983888	3619	PaF106G0100003928.01;PaF106G0300011189.01;PaF106G0700027200.01;PaF106G0800032531.01;PaF106G0400018014.01;PaF106G0400017937.01;PaF106G0100004201.01;PaF106G0300012566.01;PaF106G0600024794.01;PaF106G0200010486.01;PaF106G0100005570.01;PaF106G0200009772.01
GO:0009653	anatomical structure morphogenesis	68	-0.174234	-0.565699	0.997895	0.983888	1968	PaF106G0100005714.01;PaF106G0200006976.01;PaF106G0300012405.01;PaF106G0400017298.01;PaF106G0200010457.01;PaF106G0400015883.01;PaF106G0600023689.01;PaF106G0300013267.01;PaF106G0100000393.01;PaF106G0100000005.01;PaF106G0300011048.01;PaF106G0800031911.01;PaF106G0500020831.01;PaF106G0600024737.01;PaF106G0200010599.01;PaF106G0300013611.01;Prunus_sibirica_newGene_1788
GO:0010468	regulation of gene expression	177	-0.173852	-0.649805	0.997912	0.983888	5492	PaF106G0200010668.01;PaF106G0700028189.01;PaF106G0400015609.01;PaF106G0400016409.01;PaF106G0100001000.01;PaF106G0400015595.01;PaF106G0100000752.01;PaF106G0100001652.01;Prunus_sibirica_newGene_650;PaF106G0700026262.01;PaF106G0400017298.01;PaF106G0600023304.01;PaF106G0300012523.01;PaF106G0800030127.01;PaF106G0200009220.01;PaF106G0100006133.01;Prunus_sibirica_newGene_839;PaF106G0100004862.01;PaF106G…
GO:0019219	regulation of nucleobase-containing compound metabolic process	138	-0.176499	-0.633528	0.997921	0.983888	3355	PaF106G0700026675.01;PaF106G0100005405.01;PaF106G0800031911.01;PaF106G0400014772.01;PaF106G0400015551.01;PaF106G0800029856.01;PaF106G0200009547.01;PaF106G0800029665.01;Prunus_sibirica_newGene_1608;PaF106G0400018443.01;PaF106G0100001998.01;PaF106G0500019589.01;PaF106G0400015492.01;PaF106G0400015550.01;PaF106G0100000865.01;PaF106G0200006904.01;PaF106G0600025594.01;PaF106G0100001994.01;PaF106G050001…
GO:0051252	regulation of RNA metabolic process	152	-0.17152	-0.630495	0.997988	0.983888	3355	PaF106G0700026675.01;PaF106G0100005405.01;PaF106G0800031911.01;PaF106G0400014772.01;PaF106G0400015551.01;PaF106G0300012246.01;PaF106G0800029856.01;PaF106G0200009547.01;Prunus_sibirica_newGene_1608;PaF106G0400018443.01;PaF106G0100001998.01;PaF106G0500021323.01;PaF106G0500019589.01;PaF106G0400015492.01;PaF106G0400015550.01;PaF106G0100000865.01;PaF106G0200006904.01;PaF106G0600025594.01;PaF106G010000…
GO:0000045	autophagosome assembly	19	0.153372	0.377984	0.998043	0.983888	3516	PaF106G0600023437.01;PaF106G0800029864.01
GO:0031326	regulation of cellular biosynthetic process	141	0.185159	0.665381	0.998084	0.983888	4401	PaF106G0400016036.01;Prunus_sibirica_newGene_167;PaF106G0800030114.01;PaF106G0700027967.01;PaF106G0100000058.01;PaF106G0500021297.01;PaF106G0300010980.01;PaF106G0100001999.01;PaF106G0500019963.01;PaF106G0100000914.01;PaF106G0700027485.01;PaF106G0100000725.01;PaF106G0600023278.01;Prunus_sibirica_newGene_122;PaF106G0400017292.01;PaF106G0500018967.01;PaF106G0400018327.01;PaF106G0100001870.01;PaF106G…
GO:0048869	cellular developmental process	56	0.166727	0.513272	0.998084	0.983888	4765	PaF106G0600024841.01;PaF106G0800031242.01;PaF106G0800031477.01;PaF106G0300012566.01;PaF106G0400015769.01;PaF106G0300011240.01;PaF106G0400018179.01;PaF106G0500018967.01;PaF106G0300013002.01;PaF106G0600024072.01;PaF106G0600021767.01;PaF106G0200008034.01;PaF106G0800029530.01;PaF106G0200008575.01;PaF106G0800029477.01;PaF106G0400016868.01;PaF106G0100000510.01;PaF106G0800031792.01
GO:0006887	exocytosis	28	0.160491	0.428759	0.998088	0.983888	4319	PaF106G0100003180.01;PaF106G0800029945.01;PaF106G0100002696.01;PaF106G0200009684.01;PaF106G0700027987.01;PaF106G0400014783.01
GO:0003006	developmental process involved in reproduction	85	-0.168161	-0.564935	1	0.983888	3375	PaF106G0700026051.01;PaF106G0600024234.01;PaF106G0400015551.01;PaF106G0600023607.01;PaF106G0100001840.01;PaF106G0600024526.01;PaF106G0600024737.01;PaF106G0400015550.01;PaF106G0400017245.01;PaF106G0100000013.01;Prunus_sibirica_newGene_1788
GO:0006006	glucose metabolic process	10	-0.168264	-0.36222	1	0.983888	16150	PaF106G0500020308.01;PaF106G0300012210.01;PaF106G0600025195.01
GO:0006511	ubiquitin-dependent protein catabolic process	175	0.173345	0.640548	1	0.983888	4739	PaF106G0300011024.01;PaF106G0100005658.01;Prunus_sibirica_newGene_1558;PaF106G0200008218.01;PaF106G0600021737.01;PaF106G0100005656.01;PaF106G0600021516.01;PaF106G0100003787.01;PaF106G0600021961.01;PaF106G0300011567.01;PaF106G0300013335.01;PaF106G0600025367.01;PaF106G0700026745.01;PaF106G0200009042.01;PaF106G0300012465.01;PaF106G0600021914.01;PaF106G0400017027.01;PaF106G0600024794.01;PaF106G050001…
GO:0006886	intracellular protein transport	166	0.138127	0.506494	1	0.983888	6625	PaF106G0500021220.01;Prunus_sibirica_newGene_1434;PaF106G0600024282.01;PaF106G0600024435.01;PaF106G0300012943.01;PaF106G0800029893.01;PaF106G0600024961.01;PaF106G0300011475.01;PaF106G0100002525.01;PaF106G0600025386.01;PaF106G0100001416.01;PaF106G0400017702.01;PaF106G0100006574.01;PaF106G0100003899.01;PaF106G0600022546.01;PaF106G0100005248.01;PaF106G0200009941.01;PaF106G0600023565.01;PaF106G030001…
GO:0006888	ER to Golgi vesicle-mediated transport	65	0.149413	0.474832	1	0.983888	16523	PaF106G0600024715.01;PaF106G0300011475.01;PaF106G0800030303.01;PaF106G0100006574.01;PaF106G0600025218.01;PaF106G0200009941.01;PaF106G0800029530.01;PaF106G0200008055.01;PaF106G0200008602.01;PaF106G0600025304.01;PaF106G0500020824.01;PaF106G0300012046.01;PaF106G0300012289.01;PaF106G0500018683.01;PaF106G0100004028.01;PaF106G0100005922.01;PaF106G0300012941.01;PaF106G0400015791.01;PaF106G0600022986.01;…
GO:0009889	regulation of biosynthetic process	144	0.179239	0.64813	1	0.983888	4401	PaF106G0400016036.01;Prunus_sibirica_newGene_167;PaF106G0800030114.01;PaF106G0700027967.01;PaF106G0100000058.01;PaF106G0500021297.01;PaF106G0300010980.01;PaF106G0100001999.01;PaF106G0500019963.01;PaF106G0100000914.01;PaF106G0700027485.01;PaF106G0100000725.01;PaF106G0600023278.01;Prunus_sibirica_newGene_122;PaF106G0400017292.01;PaF106G0500018967.01;PaF106G0400018327.01;PaF106G0100001870.01;PaF106G…
GO:0009968	negative regulation of signal transduction	23	0.15442	0.396784	1	0.983888	4513	PaF106G0500020189.01;Prunus_sibirica_newGene_122;PaF106G0300011240.01;PaF106G0200009240.01;PaF106G0700028381.01;PaF106G0100004186.01
GO:0010648	negative regulation of cell communication	23	0.15442	0.396784	1	0.983888	4513	PaF106G0500020189.01;Prunus_sibirica_newGene_122;PaF106G0300011240.01;PaF106G0200009240.01;PaF106G0700028381.01;PaF106G0100004186.01
GO:0016567	protein ubiquitination	121	0.154185	0.537184	1	0.983888	5928	PaF106G0100005782.01;PaF106G0100002938.01;PaF106G0100005257.01;PaF106G0600022012.01;PaF106G0100003787.01;PaF106G0600021961.01;PaF106G0100001153.01;PaF106G0100005474.01;PaF106G0800031793.01;PaF106G0600025367.01;PaF106G0200009042.01;PaF106G0200007923.01;PaF106G0600024605.01;PaF106G0100001870.01;PaF106G0100003821.01;PaF106G0400018188.01;PaF106G0600023882.01;PaF106G0800030514.01;PaF106G0200008093.01;…
GO:0023057	negative regulation of signaling	23	0.15442	0.396784	1	0.983888	4513	PaF106G0500020189.01;Prunus_sibirica_newGene_122;PaF106G0300011240.01;PaF106G0200009240.01;PaF106G0700028381.01;PaF106G0100004186.01
GO:0031323	regulation of cellular metabolic process	182	0.168399	0.625177	1	0.983888	4401	PaF106G0400016036.01;Prunus_sibirica_newGene_167;PaF106G0800030114.01;PaF106G0200006908.01;PaF106G0700027967.01;Prunus_sibirica_newGene_1207;PaF106G0100000058.01;PaF106G0500021297.01;PaF106G0300010980.01;PaF106G0800030376.01;PaF106G0100001999.01;PaF106G0500019963.01;PaF106G0300012207.01;PaF106G0800029541.01;PaF106G0100000914.01;PaF106G0700027485.01;PaF106G0100000725.01;PaF106G0400017744.01;PaF106…
GO:0035556	intracellular signal transduction	62	-0.162771	-0.525802	1	0.983888	4548	PaF106G0500019802.01;PaF106G0400018143.01;PaF106G0100001080.01;PaF106G0700027482.01;PaF106G0800029856.01;PaF106G0600025000.01;PaF106G0500021111.01;PaF106G0100000184.01;PaF106G0300011178.01;PaF106G0100005229.01
GO:0045454	cell redox homeostasis	59	0.152442	0.473928	1	0.983888	1123	PaF106G0400018009.01;PaF106G0700028154.01;PaF106G0100005931.01
GO:0051234	establishment of localization	73	-0.165379	-0.543282	1	0.983888	1477	PaF106G0100000854.01;PaF106G0200008020.01;PaF106G0500019142.01;PaF106G0300013267.01;PaF106G0300011048.01;PaF106G0600024981.01;PaF106G0100003386.01;PaF106G0100002441.01;PaF106G0600024737.01;PaF106G0100000865.01;PaF106G0200010599.01;PaF106G0300012269.01;PaF106G0300012271.01
GO:0060255	regulation of macromolecule metabolic process	180	0.179766	0.667361	1	0.983888	4401	Prunus_sibirica_newGene_167;PaF106G0300011024.01;PaF106G0200006908.01;PaF106G0700027967.01;Prunus_sibirica_newGene_1207;PaF106G0100000058.01;PaF106G0500021297.01;PaF106G0300010980.01;PaF106G0800030376.01;PaF106G0100001999.01;PaF106G0600021737.01;PaF106G0500019963.01;PaF106G0300012207.01;PaF106G0800029541.01;PaF106G0100005656.01;PaF106G0100000914.01;PaF106G0700027485.01;PaF106G0600023278.01;Prunus…
GO:0071702	organic substance transport	36	-0.160183	-0.459586	1	0.983888	1041	PaF106G0200009625.01;PaF106G0800031478.01;PaF106G0100005071.01;PaF106G0400014991.01;PaF106G0600023224.01;PaF106G0800029283.01;PaF106G0400015793.01;PaF106G0400016045.01;PaF106G0200008020.01;PaF106G0300011048.01;PaF106G0100002441.01;PaF106G0100000865.01;PaF106G0200010599.01
GO:1901564	organonitrogen compound metabolic process	180	-0.177211	-0.66587	1	0.983888	3079	PaF106G0400015745.01;PaF106G0100000650.01;PaF106G0800029856.01;PaF106G0100005731.01;PaF106G0800029863.01;PaF106G0600025339.01;PaF106G0100001998.01;PaF106G0600025385.01;PaF106G0800031267.01;PaF106G0700028100.01;PaF106G0500019462.01;PaF106G0800030287.01;PaF106G0500020831.01;Prunus_sibirica_newGene_1959;PaF106G0100000656.01;PaF106G0300011178.01;PaF106G0100000133.01;PaF106G0600024829.01;PaF106G010000…

## Sheet: Cellular Component
Table S11 GSEA analysis based on GO functional classification in P. sibirica
ID	Description	setSize	enrichmentScore	NES	pvalue	qvalue	rank	core_enrichment
GO:0005615	extracellular space	27	0.637075	1.68826	0.00576923	1	1741	PaF106G0100004308.01;PaF106G0100005060.01;PaF106G0400016036.01;PaF106G0400017640.01;PaF106G0800030730.01;PaF106G0500020082.01;PaF106G0800030729.01;PaF106G0800030735.01;PaF106G0500020380.01
GO:0000307	cyclin-dependent protein kinase holoenzyme complex	14	-0.699247	-1.62559	0.0254237	1	3928	PaF106G0100005402.01;PaF106G0600021618.01;PaF106G0800030934.01;PaF106G0100005004.01;PaF106G0400017963.01;PaF106G0600021620.01;PaF106G0800030995.01
GO:0000786	nucleosome	43	-0.517577	-1.54887	0.0264228	1	4602	PaF106G0700026316.01;PaF106G0800029527.01;PaF106G0800029743.01;PaF106G0600022353.01;PaF106G0300014092.01;PaF106G0100003863.01;PaF106G0800029529.01;PaF106G0100003911.01;PaF106G0600022341.01;PaF106G0200009755.01;PaF106G0600022357.01;PaF106G0600024519.01;PaF106G0200009175.01;PaF106G0500021213.01;PaF106G0600025382.01;PaF106G0400017711.01;PaF106G0300012697.01;PaF106G0200009662.01;PaF106G0600021617.01;…
GO:0032040	small-subunit processome	34	-0.553767	-1.5847	0.0286885	1	167	PaF106G0800031314.01;PaF106G0100004300.01;PaF106G0200007169.01
GO:0019773	proteasome core complex, alpha-subunit complex	11	-0.680792	-1.51872	0.0504202	1	956	PaF106G0100004456.01;PaF106G0300012401.01;PaF106G0300014162.01;PaF106G0400016649.01;PaF106G0700028943.01;PaF106G0100001057.01;PaF106G0200010538.01
GO:0009524	phragmoplast	10	-0.669199	-1.46263	0.0703625	1	3720	PaF106G0800030877.01;PaF106G0700026051.01;PaF106G0100001840.01;PaF106G0300013006.01;PaF106G0100003360.01
GO:0009507	chloroplast	403	-0.289257	-1.17959	0.0823293	1	5548	PaF106G0600022468.01;PaF106G0100006007.01;PaF106G0100006152.01;PaF106G0400016936.01;PaF106G0800031060.01;PaF106G0300013680.01;PaF106G0200010668.01;PaF106G0500018651.01;PaF106G0100006413.01;PaF106G0100001211.01;PaF106G0500019129.01;PaF106G0100000752.01;PaF106G0600022805.01;PaF106G0600025580.01;PaF106G0300012237.01;PaF106G0600025757.01;PaF106G0200007301.01;PaF106G0600024062.01;PaF106G0300011217.01;…
GO:0005730	nucleolus	140	-0.350026	-1.26761	0.0907216	1	5745	PaF106G0100000947.01;PaF106G0400017011.01;PaF106G0300011177.01;PaF106G0500019532.01;PaF106G0800029408.01;PaF106G0800029373.01;PaF106G0100002923.01;PaF106G0100006502.01;PaF106G0400015595.01;PaF106G0200007022.01;PaF106G0500021197.01;PaF106G0800031677.01;PaF106G0200008486.01;PaF106G0100003944.01;PaF106G0100001520.01;PaF106G0200009128.01;PaF106G0800032427.01;PaF106G0200010846.01;PaF106G0500020577.01;…
GO:0009506	plasmodesma	135	-0.345582	-1.23579	0.0956341	1	1733	PaF106G0500020912.01;PaF106G0100006573.01;PaF106G0400016635.01;PaF106G0100001360.01;PaF106G0400018141.01;PaF106G0100001908.01;PaF106G0800031494.01;Prunus_sibirica_newGene_1930;PaF106G0800029647.01;PaF106G0100003267.01;PaF106G0100005910.01;PaF106G0300013190.01;PaF106G0100000013.01;PaF106G0200009133.01;PaF106G0300012225.01;PaF106G0300011625.01;PaF106G0600022513.01
GO:0044451	nucleoplasm part	25	0.524739	1.37088	0.108411	1	1136	Prunus_sibirica_newGene_167;PaF106G0800030114.01;PaF106G0500021297.01
GO:0005680	anaphase-promoting complex	15	-0.574388	-1.34569	0.132321	1	6015	PaF106G0700026480.01;PaF106G0200009826.01;PaF106G0700027243.01;PaF106G0300013196.01;PaF106G0600025154.01;PaF106G0100000437.01;PaF106G0300012476.01;PaF106G0100002290.01;PaF106G0200009992.01;PaF106G0400017940.01
GO:0005759	mitochondrial matrix	40	-0.437759	-1.2845	0.136179	1	2199	PaF106G0400015310.01;PaF106G0100003733.01;PaF106G0400018040.01;PaF106G0400016920.01;PaF106G0300012782.01;PaF106G0200010666.01;PaF106G0700026428.01;PaF106G0100003868.01;PaF106G0600025290.01;PaF106G0100005846.01;PaF106G0400015916.01;PaF106G0700026793.01;PaF106G0100004611.01;PaF106G0400014802.01;PaF106G0600024648.01;PaF106G0700026423.01;PaF106G0200007822.01;Prunus_sibirica_newGene_263;PaF106G0200010…
GO:0071944	cell periphery	146	-0.321744	-1.16921	0.143737	1	3344	PaF106G0100004529.01;PaF106G0400017346.01;PaF106G0400016478.01;PaF106G0100005769.01;PaF106G0100003386.01;PaF106G0600024234.01;PaF106G0400018079.01;PaF106G0500020697.01;PaF106G0100004463.01;PaF106G0800031267.01;PaF106G0600022471.01;PaF106G0300012679.01;PaF106G0500020162.01;PaF106G0100001786.01;PaF106G0500020912.01;PaF106G0300011883.01;PaF106G0600024737.01;PaF106G0600024926.01;PaF106G0600025303.01;…
GO:0042025	host cell nucleus	138	-0.325709	-1.17225	0.150826	1	4035	PaF106G0700026992.01;PaF106G0600024386.01;PaF106G0400016737.01;PaF106G0300014092.01;PaF106G0800030424.01;PaF106G0100003863.01;PaF106G0500020244.01;PaF106G0700027733.01;PaF106G0100005700.01;PaF106G0100005402.01;PaF106G0600024198.01;PaF106G0100003911.01;PaF106G0400014926.01;PaF106G0100005768.01;PaF106G0700028452.01;PaF106G0300014098.01;PaF106G0600022341.01;PaF106G0200009755.01;PaF106G0600021618.01;…
GO:0000785	chromatin	24	-0.495346	-1.28777	0.152838	1	4787	PaF106G0100000165.01;PaF106G0100002106.01;PaF106G0200009220.01;PaF106G0200010665.01;PaF106G0300013509.01;PaF106G0200010116.01;PaF106G0200008259.01;PaF106G0100001206.01;PaF106G0500018649.01
GO:0071013	catalytic step 2 spliceosome	20	-0.519481	-1.30875	0.157895	1	87	PaF106G0500021197.01;PaF106G0500020492.01;PaF106G0600025612.01;PaF106G0800032461.01
GO:0044427	chromosomal part	15	-0.547065	-1.28168	0.171367	1	2383	PaF106G0100002106.01;PaF106G0200009220.01;PaF106G0200010116.01;PaF106G0100005229.01;PaF106G0500018649.01
GO:0005669	transcription factor TFIID complex	16	0.533782	1.27324	0.185741	1	203	Prunus_sibirica_newGene_167
GO:0031224	intrinsic component of membrane	20	-0.498713	-1.25642	0.204211	1	3138	PaF106G0600024234.01;PaF106G0100001786.01;PaF106G0500020912.01;PaF106G0300011883.01;PaF106G0300013402.01;PaF106G0300013611.01
GO:0044459	plasma membrane part	19	-0.504266	-1.2539	0.211416	1	4734	PaF106G0600023689.01;PaF106G0300011048.01;PaF106G0100005769.01;PaF106G0100001786.01;PaF106G0500020912.01;PaF106G0300011883.01;PaF106G0600024737.01;PaF106G0200010599.01
GO:0046540	U4/U6 x U5 tri-snRNP complex	21	-0.483573	-1.23179	0.215031	1	87	PaF106G0500020492.01;PaF106G0600025612.01;PaF106G0500018488.01;PaF106G0500019204.01;PaF106G0800032461.01
GO:0044425	membrane part	47	-0.389405	-1.1646	0.217573	1	3138	PaF106G0600024234.01;PaF106G0600025385.01;PaF106G0100004031.01;PaF106G0100001786.01;PaF106G0500020912.01;PaF106G0300011883.01;PaF106G0600024737.01;PaF106G0200010599.01;PaF106G0300013402.01;PaF106G0300013611.01
GO:0009535	chloroplast thylakoid membrane	115	-0.320217	-1.12963	0.224066	1	5694	PaF106G0500018851.01;PaF106G0400015937.01;PaF106G0200009944.01;PaF106G0200009956.01;PaF106G0400016864.01;PaF106G0100003797.01;PaF106G0200007345.01;PaF106G0100006126.01;PaF106G0300013308.01;PaF106G0600024062.01;PaF106G0500020784.01;PaF106G0200010527.01;PaF106G0100000276.01;PaF106G0200008144.01;PaF106G0600021529.01;PaF106G0500019142.01;PaF106G0300011235.01;PaF106G0500018484.01;PaF106G0700026065.01;…
GO:0005815	microtubule organizing center	10	-0.56602	-1.23711	0.228145	1	5163	PaF106G0200009867.01;PaF106G0700028730.01;PaF106G0700028147.01;PaF106G0500020715.01;PaF106G0300011178.01;PaF106G0100005229.01
GO:0005618	cell wall	85	0.33808	1.13033	0.238004	1	1662	PaF106G0600025342.01;PaF106G0800030157.01;PaF106G0100000801.01;PaF106G0800030158.01;PaF106G0700026837.01;PaF106G0600025147.01;PaF106G0500020134.01;PaF106G0100006001.01;PaF106G0400016284.01;PaF106G0100003078.01;PaF106G0700028280.01;PaF106G0300012535.01
GO:0030173	integral component of Golgi membrane	20	0.479882	1.2006	0.240987	1	2456	PaF106G0800029831.01;PaF106G0600022138.01;PaF106G0600024698.01;PaF106G0600024715.01
GO:0005682	U5 snRNP	12	-0.526231	-1.20072	0.242171	1	5380	PaF106G0400016874.01;PaF106G0100000819.01;PaF106G0100001114.01;PaF106G0500020492.01;PaF106G0600025612.01;PaF106G0800031998.01
GO:0009536	plastid	160	-0.298389	-1.09344	0.244813	1	4418	PaF106G0600021529.01;PaF106G0400015883.01;PaF106G0500019142.01;PaF106G0100006270.01;PaF106G0500018973.01;PaF106G0300012622.01;PaF106G0300010981.01;PaF106G0200010051.01;PaF106G0400015716.01;PaF106G0200006926.01;PaF106G0100004683.01;PaF106G0500020755.01;PaF106G0100003185.01;PaF106G0400017346.01;PaF106G0600025626.01;PaF106G0400015745.01;PaF106G0100000650.01;PaF106G0500018974.01;PaF106G0300014343.01;…
GO:0005811	lipid droplet	15	-0.509149	-1.19285	0.260304	1	4441	PaF106G0300014298.01;PaF106G0300014304.01;PaF106G0300014303.01;PaF106G0100000027.01;PaF106G0300014296.01;PaF106G0300014306.01;PaF106G0300014305.01
GO:0055035	plastid thylakoid membrane	26	0.439604	1.16175	0.26177	1	1103	PaF106G0400017389.01;PaF106G0300013257.01;PaF106G0100000058.01
GO:0009570	chloroplast stroma	130	-0.306048	-1.09612	0.263374	1	4518	PaF106G0100002655.01;PaF106G0300011056.01;PaF106G0700025961.01;PaF106G0100000816.01;PaF106G0800032704.01;PaF106G0100003512.01;PaF106G0700026065.01;PaF106G0600022057.01;PaF106G0300012559.01;PaF106G0300012622.01;PaF106G0100004771.01;PaF106G0100006672.01;PaF106G0400015716.01;PaF106G0400017044.01;PaF106G0400018222.01;PaF106G0100000316.01;PaF106G0600024115.01;PaF106G0400018127.01;PaF106G0200008502.01;…
GO:0005874	microtubule	89	-0.326299	-1.09748	0.273684	1	4569	PaF106G0100004810.01;PaF106G0600025457.01;PaF106G0600024279.01;PaF106G0700028147.01;PaF106G0600023689.01;PaF106G0100006249.01;PaF106G0500020715.01;PaF106G0600024713.01;PaF106G0400015830.01;PaF106G0100000393.01;PaF106G0600025416.01;PaF106G0400015576.01;PaF106G0600022418.01;PaF106G0100004913.01;PaF106G0200010493.01;PaF106G0700026376.01;PaF106G0100006466.01;PaF106G0100004282.01;PaF106G0700028460.01;…
GO:0005743	mitochondrial inner membrane	54	0.368742	1.12511	0.27821	1	6895	PaF106G0100004527.01;PaF106G0100004816.01;PaF106G0500020945.01;PaF106G0100004938.01;PaF106G0300012121.01;PaF106G0200010136.01;PaF106G0400015316.01;PaF106G0600021809.01;PaF106G0100001416.01;PaF106G0500020292.01;PaF106G0400015530.01;PaF106G0500020211.01;PaF106G0100004806.01;PaF106G0700027273.01;PaF106G0200007832.01;PaF106G0200008229.01;PaF106G0300013960.01;PaF106G0600022764.01;PaF106G0200009558.01;…
GO:0030054	cell junction	49	-0.367878	-1.11781	0.28125	1	1733	PaF106G0600025163.01;Prunus_sibirica_newGene_68;PaF106G0600023689.01;PaF106G0100000005.01;PaF106G0200010345.01;PaF106G0300011048.01;PaF106G0300012694.01;PaF106G0400018079.01;PaF106G0500020162.01;PaF106G0500020912.01;PaF106G0100006573.01;PaF106G0200010599.01;Prunus_sibirica_newGene_1930;PaF106G0300013190.01;PaF106G0100000013.01;PaF106G0300012225.01
GO:0005694	chromosome	50	-0.362706	-1.10624	0.29375	1	4926	PaF106G0700028770.01;PaF106G0100002106.01;PaF106G0700027028.01;PaF106G0700026904.01;PaF106G0200009220.01;PaF106G0500018685.01;PaF106G0400014811.01;Prunus_sibirica_newGene_1413;PaF106G0200010278.01;PaF106G0800029964.01;PaF106G0100005314.01;PaF106G0100002637.01;PaF106G0200010116.01;PaF106G0700026776.01;PaF106G0200007604.01;PaF106G0500020451.01;PaF106G0600021810.01;PaF106G0100005229.01;PaF106G050001…
GO:0034357	photosynthetic membrane	27	0.422062	1.11847	0.298077	1	1103	PaF106G0400017389.01;PaF106G0300013257.01;PaF106G0100000058.01
GO:0005871	kinesin complex	19	-0.453683	-1.12812	0.300211	1	3485	PaF106G0700028460.01;PaF106G0600023185.01;PaF106G0400015516.01;PaF106G0400018008.01;PaF106G0100006151.01;PaF106G0100000520.01
GO:0055044	symplast	40	-0.373955	-1.09728	0.306911	1	1733	PaF106G0600025163.01;Prunus_sibirica_newGene_68;PaF106G0600023689.01;PaF106G0100000005.01;PaF106G0200010345.01;PaF106G0300012694.01;PaF106G0400018079.01;PaF106G0500020162.01;PaF106G0500020912.01;PaF106G0100006573.01;Prunus_sibirica_newGene_1930;PaF106G0300013190.01;PaF106G0100000013.01;PaF106G0300012225.01
GO:0005576	extracellular region	143	0.301006	1.07162	0.318271	1	3016	PaF106G0800030069.01;PaF106G0400014792.01;PaF106G0600025342.01;PaF106G0400016036.01;PaF106G0800030733.01;PaF106G0400015069.01;PaF106G0400016721.01;PaF106G0700026837.01;PaF106G0300012152.01;PaF106G0600025147.01;PaF106G0800030488.01;PaF106G0200010085.01;PaF106G0300012162.01;PaF106G0100000738.01;PaF106G0600023855.01;PaF106G0400016284.01;PaF106G0800031721.01;PaF106G0600024378.01;PaF106G0600023856.01;…
GO:0048046	apoplast	72	0.336618	1.08587	0.328713	1	1662	PaF106G0800030157.01;PaF106G0100000801.01;PaF106G0300012043.01;PaF106G0800030158.01;PaF106G0800031890.01;PaF106G0200007152.01;PaF106G0500020134.01;PaF106G0800031767.01;PaF106G0400016284.01;PaF106G0700027240.01;PaF106G0100003078.01;PaF106G0300012535.01
GO:0070469	respiratory chain	10	0.508442	1.08699	0.358349	1	3205	PaF106G0100000724.01;PaF106G0100004938.01;PaF106G0100006272.01
GO:0016604	nuclear body	15	-0.450469	-1.05537	0.388286	1	5827	PaF106G0100001000.01;PaF106G0400017939.01;PaF106G0200009155.01;PaF106G0100006133.01;PaF106G0700027243.01;PaF106G0800032140.01
GO:0005911	cell-cell junction	44	-0.345778	-1.04035	0.390438	1	1733	PaF106G0600025163.01;Prunus_sibirica_newGene_68;PaF106G0600023689.01;PaF106G0100000005.01;PaF106G0200010345.01;PaF106G0300011048.01;PaF106G0300012694.01;PaF106G0400018079.01;PaF106G0500020162.01;PaF106G0500020912.01;PaF106G0100006573.01;Prunus_sibirica_newGene_1930;PaF106G0300013190.01;PaF106G0100000013.01;PaF106G0300012225.01
GO:0009505	plant-type cell wall	34	-0.360706	-1.03222	0.401639	1	2055	PaF106G0100001510.01;PaF106G0500020912.01;PaF106G0100005603.01;PaF106G0100001360.01;PaF106G0400018141.01;PaF106G0100005910.01;PaF106G0100006463.01
GO:0042651	thylakoid membrane	30	0.37704	1.03275	0.403101	1	1103	PaF106G0400017389.01;PaF106G0300013257.01;PaF106G0100000058.01
GO:0046658	anchored component of plasma membrane	50	-0.339987	-1.03695	0.404167	1	3138	PaF106G0500020069.01;PaF106G0100004640.01;PaF106G0700028506.01;PaF106G0700026533.01;PaF106G0600021467.01;PaF106G0100002745.01;PaF106G0100001786.01;PaF106G0500020912.01;PaF106G0300011883.01;PaF106G0500018538.01;PaF106G0200008510.01;PaF106G0400015607.01;PaF106G0800032723.01;PaF106G0600024201.01;PaF106G0500021035.01
GO:0044436	thylakoid part	29	0.384952	1.04039	0.406615	1	1103	PaF106G0400017389.01;PaF106G0300013257.01;PaF106G0100000058.01
GO:0097708	intracellular vesicle	16	-0.424421	-1.013	0.426439	1	3858	PaF106G0100005545.01;PaF106G0600023327.01;PaF106G0400016240.01
GO:0031463	Cul3-RING ubiquitin ligase complex	10	-0.478694	-1.04625	0.428571	1	4124	PaF106G0600021483.01;PaF106G0100005731.01;PaF106G0500018684.01
GO:0016459	myosin complex	12	-0.444724	-1.01474	0.434238	1	115	PaF106G0200006790.01
GO:0031976	plastid thylakoid	30	0.36908	1.01095	0.436047	1	1103	PaF106G0400017389.01;PaF106G0300013257.01;PaF106G0100000058.01
GO:0031225	anchored component of membrane	17	-0.41794	-1.01623	0.441423	1	3138	PaF106G0600024234.01;PaF106G0100001786.01;PaF106G0500020912.01;PaF106G0300011883.01;PaF106G0300013402.01;PaF106G0300013611.01
GO:0005643	nuclear pore	16	-0.41405	-0.98825	0.462687	1	7901	PaF106G0700029023.01;PaF106G0100006457.01;PaF106G0700029010.01;PaF106G0500020101.01;PaF106G0500020106.01;PaF106G0100001211.01;PaF106G0300013777.01;PaF106G0700028475.01;PaF106G0700027403.01;PaF106G0700028958.01
GO:0005774	vacuolar membrane	92	0.289368	0.977326	0.492337	1	5194	PaF106G0400015437.01;PaF106G0800029394.01;PaF106G0200010724.01;PaF106G0800029415.01;PaF106G0400016284.01;Prunus_sibirica_newGene_1434;PaF106G0100002962.01;PaF106G0100003968.01;PaF106G0300013527.01;PaF106G0500019800.01;PaF106G0200010360.01;PaF106G0800029416.01;PaF106G0800030839.01;PaF106G0300010916.01;PaF106G0800029986.01;PaF106G0600023297.01;PaF106G0700028702.01;PaF106G0300013728.01;PaF106G080003…
GO:0005840	ribosome	169	-0.263536	-0.972667	0.515528	1	7204	PaF106G0100002326.01;PaF106G0100002020.01;PaF106G0800030135.01;PaF106G0100005792.01;PaF106G0600022470.01;PaF106G0100006369.01;PaF106G0200010761.01;PaF106G0400016931.01;PaF106G0200008329.01;PaF106G0600023818.01;PaF106G0100001024.01;PaF106G0800029697.01;PaF106G0800031431.01;PaF106G0100000900.01;PaF106G0700025939.01;PaF106G0700027764.01;PaF106G0200007226.01;PaF106G0600022381.01;PaF106G0100003303.01;…
GO:0005635	nuclear envelope	17	0.397952	0.956611	0.517176	1	234	PaF106G0200010593.01
GO:0005740	mitochondrial envelope	10	0.443777	0.948746	0.527205	1	3646	PaF106G0200010136.01;PaF106G0100001416.01;PaF106G0100005473.01
GO:0000790	nuclear chromatin	22	-0.360549	-0.931646	0.53277	1	4787	PaF106G0100005460.01;PaF106G0400018005.01;PaF106G0100002106.01;PaF106G0700026316.01;PaF106G0800029743.01;PaF106G0600022353.01;PaF106G0200010116.01;PaF106G0100003805.01;PaF106G0600025382.01;PaF106G0200010615.01
GO:0031090	organelle membrane	40	0.334805	0.964179	0.533333	1	5751	PaF106G0200010593.01;PaF106G0400016284.01;Prunus_sibirica_newGene_1434;PaF106G0200010136.01;PaF106G0200010360.01;PaF106G0200008889.01;PaF106G0100001416.01;PaF106G0500020504.01;PaF106G0800029453.01;PaF106G0500020674.01;PaF106G0600025282.01;PaF106G0500019536.01;PaF106G0600023740.01;PaF106G0200010613.01;PaF106G0500020378.01;PaF106G0100002155.01
GO:0031966	mitochondrial membrane	13	0.41829	0.948141	0.535849	1	4876	PaF106G0200010136.01;PaF106G0100001416.01;PaF106G0100006091.01;PaF106G0600023912.01;PaF106G0200009500.01
GO:0005736	DNA-directed RNA polymerase I complex	11	0.429259	0.934358	0.539924	1	2429	PaF106G0500021354.01;PaF106G0400015246.01;PaF106G0200008361.01
GO:0030176	integral component of endoplasmic reticulum membrane	24	-0.357287	-0.928849	0.543668	1	176	PaF106G0100001661.01;PaF106G0300011016.01;PaF106G0500018834.01;PaF106G0300011157.01
GO:0016607	nuclear speck	20	-0.366213	-0.922611	0.549474	1	5633	PaF106G0100005950.01;PaF106G0100001000.01;PaF106G0100005319.01;PaF106G0100006133.01;PaF106G0600021466.01;PaF106G0200009815.01;PaF106G0800032140.01;PaF106G0100003088.01;PaF106G0700027291.01
GO:0000325	plant-type vacuole	17	0.384503	0.92428	0.557252	1	3069	PaF106G0400015437.01;PaF106G0800029394.01;PaF106G0800029415.01;PaF106G0800029416.01;PaF106G0600025386.01;PaF106G0800029986.01
GO:0005665	DNA-directed RNA polymerase II, core complex	14	0.403707	0.917935	0.564151	1	3728	PaF106G0500021354.01;PaF106G0400015246.01;PaF106G0200008361.01;PaF106G0800031317.01
GO:0030127	COPII vesicle coat	12	0.405164	0.907334	0.56979	1	11553	PaF106G0600025304.01;PaF106G0100000365.01;PaF106G0100004028.01;PaF106G0600022986.01;PaF106G0200008204.01;PaF106G0800029292.01;PaF106G0100000672.01;PaF106G0600025188.01;PaF106G0100001422.01;PaF106G0100002013.01;PaF106G0300011332.01;PaF106G0300014591.01
GO:0005839	proteasome core complex	16	-0.38074	-0.908747	0.571429	1	8603	PaF106G0100002789.01;PaF106G0200008715.01;PaF106G0100006512.01;PaF106G0300011129.01;PaF106G0400016897.01;PaF106G0100005711.01;PaF106G0100004456.01;PaF106G0300014162.01;PaF106G0400016649.01;PaF106G0100000230.01;PaF106G0600022526.01
GO:0015934	large ribosomal subunit	16	-0.376905	-0.899592	0.58209	1	7691	PaF106G0700028030.01;PaF106G0800029896.01;PaF106G0100003708.01;PaF106G0100002777.01;PaF106G0700028850.01;PaF106G0600024352.01;PaF106G0300012081.01;PaF106G0500020278.01;PaF106G0600023505.01;PaF106G0800031398.01
GO:0009706	chloroplast inner membrane	17	-0.365561	-0.888871	0.59205	1	1960	PaF106G0100006562.01;PaF106G0300011496.01;PaF106G0500018518.01;PaF106G0600024902.01;PaF106G0200008144.01;PaF106G0500019938.01;PaF106G0800031095.01
GO:0005667	transcription factor complex	19	0.360964	0.894476	0.593573	1	203	Prunus_sibirica_newGene_167
GO:0031977	thylakoid lumen	13	-0.388038	-0.887527	0.599576	1	4328	PaF106G0300011235.01;PaF106G0100002706.01;PaF106G0700026086.01;PaF106G0400018285.01
GO:0019866	organelle inner membrane	12	0.397174	0.889439	0.608031	1	3753	PaF106G0200010136.01;PaF106G0100001416.01;PaF106G0500020504.01
GO:0009532	plastid stroma	37	-0.305848	-0.889408	0.614141	1	2940	PaF106G0400015716.01;PaF106G0300014343.01;PaF106G0100003621.01;PaF106G0600024594.01;PaF106G0100004232.01;PaF106G0800030117.01;PaF106G0400018285.01;PaF106G0100004031.01;PaF106G0600023422.01;PaF106G0600023506.01
GO:0030312	external encapsulating structure	22	-0.341352	-0.882041	0.615222	1	4182	PaF106G0100000005.01;PaF106G0200010345.01;PaF106G0100004529.01;PaF106G0500020912.01;PaF106G0100000522.01;PaF106G0300012156.01
GO:0031305	integral component of mitochondrial inner membrane	15	0.37896	0.889074	0.619224	1	3849	PaF106G0800030380.01;PaF106G0300014256.01;PaF106G0100006739.01;PaF106G0100001416.01;PaF106G0700027333.01
GO:0000139	Golgi membrane	79	-0.27481	-0.91418	0.619632	1	1542	PaF106G0800031342.01;PaF106G0200010176.01;PaF106G0100002252.01;PaF106G0100002217.01
GO:0030126	COPI vesicle coat	10	-0.399351	-0.872836	0.626866	1	11666	PaF106G0500021092.01;PaF106G0400017243.01;PaF106G0300014566.01;PaF106G0300014418.01;PaF106G0400017097.01;PaF106G0800031415.01;PaF106G0400017439.01;PaF106G0300014419.01;PaF106G0300013656.01
GO:0044430	cytoskeletal part	24	-0.33397	-0.868231	0.637555	1	6619	PaF106G0200009867.01;PaF106G0400017682.01;PaF106G0100003234.01;PaF106G0100005714.01;PaF106G0100004810.01;PaF106G0600023689.01;PaF106G0100000393.01;PaF106G0500020697.01;PaF106G0800031267.01;PaF106G0300011178.01;PaF106G0100005229.01
GO:0022627	cytosolic small ribosomal subunit	46	-0.297467	-0.890885	0.641079	1	8060	PaF106G0600025595.01;PaF106G0400014638.01;PaF106G0100002671.01;PaF106G0200007241.01;PaF106G0700029211.01;PaF106G0100006149.01;PaF106G0100005792.01;PaF106G0300013511.01;PaF106G0600022470.01;PaF106G0100001796.01;PaF106G0100000254.01;PaF106G0500020906.01;PaF106G0100000022.01;PaF106G0300011413.01;PaF106G0200007836.01;PaF106G0500021199.01;PaF106G0600022363.01;PaF106G0100002600.01;PaF106G0800030246.01;…
GO:0031982	vesicle	26	-0.321735	-0.861322	0.66242	1	3858	PaF106G0800030039.01;PaF106G0600023327.01;PaF106G0700029066.01;PaF106G0400016240.01
GO:0000932	P-body	17	0.357416	0.859168	0.664122	1	6651	Prunus_sibirica_newGene_35;PaF106G0400015017.01;PaF106G0300012339.01;PaF106G0400016490.01;PaF106G0500018600.01;PaF106G0700028111.01;PaF106G0600021746.01
GO:0005887	integral component of plasma membrane	52	0.289864	0.876219	0.682879	1	4087	PaF106G0400014660.01;PaF106G0100001822.01;PaF106G0500020017.01;PaF106G0100003078.01;PaF106G0400017335.01;PaF106G0100000259.01;PaF106G0600022138.01;PaF106G0100005894.01;PaF106G0800031374.01;PaF106G0100001675.01;PaF106G0600024698.01;PaF106G0400014661.01;PaF106G0400015345.01;PaF106G0400018349.01;PaF106G0700026370.01;PaF106G0400017435.01;PaF106G0100004478.01;PaF106G0300013782.01;PaF106G0800029565.01;…
GO:1902494	catalytic complex	69	0.271564	0.871589	0.68932	1	4513	Prunus_sibirica_newGene_167;PaF106G0300011024.01;Prunus_sibirica_newGene_1207;PaF106G0500021297.01;PaF106G0600021737.01;PaF106G0300012207.01;PaF106G0100005656.01;PaF106G0300011567.01;PaF106G0500019123.01;PaF106G0300012465.01;PaF106G0400017027.01;PaF106G0300013002.01;PaF106G0600022565.01;PaF106G0100003259.01;PaF106G0800030543.01;PaF106G0800029493.01;PaF106G0100004186.01
GO:0044437	vacuolar part	16	0.348633	0.8316	0.694184	1	5751	PaF106G0400016284.01;Prunus_sibirica_newGene_1434;PaF106G0200010360.01;PaF106G0800029453.01;PaF106G0500020674.01;PaF106G0600023740.01;PaF106G0500020378.01;PaF106G0100002155.01
GO:0031969	chloroplast membrane	23	-0.325919	-0.844617	0.700422	1	3966	PaF106G0500018841.01;PaF106G0400015745.01;PaF106G0600025689.01;PaF106G0600025840.01;PaF106G0100004031.01;PaF106G0700028538.01
GO:0031967	organelle envelope	57	0.281251	0.864026	0.704501	1	4670	PaF106G0200010593.01;PaF106G0400017389.01;PaF106G0700027967.01;PaF106G0100000058.01;PaF106G0200010136.01;PaF106G0600023278.01;PaF106G0200008889.01;PaF106G0100005360.01;PaF106G0100001416.01;PaF106G0500020504.01;PaF106G0800029453.01;PaF106G0100001646.01;PaF106G0500019536.01;PaF106G0100002888.01
GO:0031975	envelope	57	0.281251	0.864026	0.704501	1	4670	PaF106G0200010593.01;PaF106G0400017389.01;PaF106G0700027967.01;PaF106G0100000058.01;PaF106G0200010136.01;PaF106G0600023278.01;PaF106G0200008889.01;PaF106G0100005360.01;PaF106G0100001416.01;PaF106G0500020504.01;PaF106G0800029453.01;PaF106G0100001646.01;PaF106G0500019536.01;PaF106G0100002888.01
GO:0044428	nuclear part	95	0.262075	0.883291	0.711799	1	1295	Prunus_sibirica_newGene_167;PaF106G0200010593.01;PaF106G0800030114.01;Prunus_sibirica_newGene_1207;PaF106G0500021297.01;PaF106G0100000204.01;PaF106G0800029684.01
GO:1990234	transferase complex	59	0.277085	0.859813	0.720077	1	4513	Prunus_sibirica_newGene_167;PaF106G0300011024.01;PaF106G0500021297.01;PaF106G0600021737.01;PaF106G0100005656.01;PaF106G0300011567.01;PaF106G0500019123.01;PaF106G0300012465.01;PaF106G0400017027.01;PaF106G0300013002.01;PaF106G0600022565.01;PaF106G0100003259.01;PaF106G0800030543.01;PaF106G0800029493.01;PaF106G0100004186.01
GO:0000177	cytoplasmic exosome (RNase complex)	10	0.369011	0.788906	0.722326	1	1989	Prunus_sibirica_newGene_1207;PaF106G0300012207.01
GO:0031011	Ino80 complex	14	-0.350571	-0.814997	0.722458	1	7498	PaF106G0600023055.01;PaF106G0700029233.01;PaF106G0100006275.01;PaF106G0600024448.01;PaF106G0100000434.01;PaF106G0100001385.01;PaF106G0100004377.01
GO:0030687	preribosome, large subunit precursor	16	-0.33787	-0.806425	0.724947	1	12861	PaF106G0100000800.01;PaF106G0700029167.01;PaF106G0800031458.01;Prunus_sibirica_newGene_1894;PaF106G0100006503.01;PaF106G0400015351.01;PaF106G0300011581.01;PaF106G0800032625.01;PaF106G0300013550.01;PaF106G0700026271.01;PaF106G0300012255.01;PaF106G0300011177.01;PaF106G0600021536.01;PaF106G0700028484.01;PaF106G0400017472.01
GO:0005747	mitochondrial respiratory chain complex I	19	0.327211	0.810835	0.727788	1	8122	PaF106G0100000669.01;PaF106G0200007306.01;PaF106G0100000769.01;PaF106G0300013349.01;PaF106G0700026309.01;PaF106G0500021109.01;PaF106G0200010575.01;PaF106G0600023005.01;PaF106G0800031567.01
GO:0009941	chloroplast envelope	117	-0.246572	-0.871041	0.734864	1	6116	PaF106G0100004013.01;PaF106G0200010131.01;PaF106G0600025623.01;PaF106G0200006806.01;PaF106G0100006310.01;PaF106G0500018518.01;PaF106G0400015115.01;PaF106G0100004163.01;PaF106G0400015937.01;PaF106G0200009956.01;PaF106G0300011724.01;PaF106G0500019376.01;PaF106G0600023554.01;PaF106G0600024062.01;PaF106G0200008291.01;PaF106G0600023304.01;PaF106G0200010527.01;PaF106G0600025718.01;PaF106G0600025371.01;…
GO:0000228	nuclear chromosome	12	-0.345697	-0.788789	0.73904	1	2383	PaF106G0300011565.01;PaF106G0100002757.01;PaF106G0100005071.01;PaF106G0100002106.01;PaF106G0200010116.01;PaF106G0200010615.01
GO:0030136	clathrin-coated vesicle	12	0.352174	0.788667	0.741874	1	2259	PaF106G0300012095.01;PaF106G0100000873.01
GO:0022625	cytosolic large ribosomal subunit	68	-0.258205	-0.837097	0.742972	1	7685	PaF106G0100001489.01;PaF106G0400017099.01;PaF106G0800031311.01;PaF106G0800029346.01;PaF106G0300012485.01;PaF106G0100000482.01;PaF106G0100002032.01;PaF106G0500019258.01;PaF106G0600021832.01;PaF106G0500020226.01;PaF106G0800029362.01;PaF106G0100002963.01;PaF106G0200010812.01;PaF106G0800030135.01;PaF106G0800030251.01;PaF106G0300013516.01;PaF106G0100000849.01;PaF106G0700026577.01;PaF106G0700025953.01;…
GO:0043228	non-membrane-bounded organelle	84	-0.254351	-0.854117	0.754678	1	6743	PaF106G0100005071.01;PaF106G0500019580.01;PaF106G0200009556.01;PaF106G0200010240.01;PaF106G0100002612.01;PaF106G0700027642.01;PaF106G0200009867.01;PaF106G0200008193.01;PaF106G0700027031.01;PaF106G0400017682.01;PaF106G0100006633.01;PaF106G0100000165.01;PaF106G0500019532.01;PaF106G0100003234.01;PaF106G0200010692.01;PaF106G0100005714.01;PaF106G0400015595.01;PaF106G0100002106.01;PaF106G0700027028.01;…
GO:0043232	intracellular non-membrane-bounded organelle	84	-0.254351	-0.854117	0.754678	1	6743	PaF106G0100005071.01;PaF106G0500019580.01;PaF106G0200009556.01;PaF106G0200010240.01;PaF106G0100002612.01;PaF106G0700027642.01;PaF106G0200009867.01;PaF106G0200008193.01;PaF106G0700027031.01;PaF106G0400017682.01;PaF106G0100006633.01;PaF106G0100000165.01;PaF106G0500019532.01;PaF106G0100003234.01;PaF106G0200010692.01;PaF106G0100005714.01;PaF106G0400015595.01;PaF106G0100002106.01;PaF106G0700027028.01;…
GO:0010287	plastoglobule	23	-0.302947	-0.785086	0.763713	1	6943	PaF106G0400017395.01;PaF106G0200010142.01;PaF106G0300012505.01;PaF106G0800032232.01;PaF106G0500018851.01;PaF106G0400015937.01;PaF106G0200009956.01;PaF106G0500018484.01;PaF106G0500019389.01;PaF106G0300014343.01;PaF106G0100003621.01;PaF106G0800030117.01;PaF106G0400018285.01;PaF106G0400017422.01
GO:0009522	photosystem I	21	-0.307418	-0.783075	0.772443	1	1724	PaF106G0800030884.01;PaF106G0600023109.01;PaF106G0300012505.01;PaF106G0400015937.01;PaF106G0200009956.01;PaF106G0500020784.01;PaF106G0500018484.01;PaF106G0400017422.01;PaF106G0800032177.01
GO:0016592	mediator complex	36	-0.276138	-0.79455	0.77572	1	5956	PaF106G0800031397.01;PaF106G0100005972.01;PaF106G0400017289.01;PaF106G0300012715.01;PaF106G0500018685.01;PaF106G0400018155.01;PaF106G0600025110.01;PaF106G0100004224.01;PaF106G0500018715.01
GO:0009705	plant-type vacuole membrane	16	-0.325023	-0.775762	0.778252	1	3189	PaF106G0500020831.01;PaF106G0800029648.01;PaF106G0600022647.01
GO:0005773	vacuole	68	0.259547	0.827513	0.78373	1	4341	PaF106G0600024841.01;PaF106G0400016284.01;PaF106G0700027112.01;Prunus_sibirica_newGene_1434;PaF106G0200008929.01;PaF106G0500020463.01;PaF106G0400018014.01;PaF106G0600025373.01;PaF106G0700027098.01;PaF106G0200010360.01;PaF106G0500019130.01;PaF106G0600025386.01;PaF106G0100002756.01;PaF106G0400018401.01;PaF106G0100003899.01;PaF106G0800029453.01;PaF106G0100006243.01;PaF106G0500020674.01;PaF106G080003…
GO:0000176	nuclear exosome (RNase complex)	11	0.338891	0.737655	0.790875	1	1989	Prunus_sibirica_newGene_1207;PaF106G0300012207.01
GO:0030686	90S preribosome	12	-0.329303	-0.751382	0.793319	1	8169	PaF106G0600025838.01;PaF106G0300013727.01;PaF106G0800031082.01;PaF106G0200010240.01;PaF106G0700027642.01;PaF106G0200010846.01;PaF106G0600021536.01;PaF106G0800029759.01;PaF106G0100006323.01
GO:0080008	Cul4-RING E3 ubiquitin ligase complex	17	-0.314323	-0.764286	0.799163	1	6069	PaF106G0400016874.01;PaF106G0600022056.01;PaF106G0100006633.01;PaF106G0100004361.01;PaF106G0200007211.01;PaF106G0500020275.01;PaF106G0200009155.01;PaF106G0800029759.01;PaF106G0300011178.01
GO:0015935	small ribosomal subunit	22	-0.292315	-0.755332	0.801268	1	837	PaF106G0100000189.01;PaF106G0100005822.01;PaF106G0300014117.01;PaF106G0200010348.01;PaF106G0700028825.01
GO:0009526	plastid envelope	44	0.274211	0.801078	0.804	1	4670	PaF106G0400017389.01;PaF106G0700027967.01;PaF106G0100000058.01;PaF106G0600023278.01;PaF106G0200008889.01;PaF106G0100005360.01;PaF106G0100001416.01;PaF106G0500020504.01;PaF106G0800029453.01;PaF106G0100001646.01;PaF106G0500019536.01;PaF106G0100002888.01
GO:0005789	endoplasmic reticulum membrane	131	0.23985	0.844506	0.807692	1	6122	PaF106G0300014048.01;PaF106G0400016951.01;PaF106G0200010830.01;PaF106G0100002211.01;PaF106G0300014042.01;PaF106G0500019433.01;PaF106G0400017041.01;PaF106G0600024715.01;PaF106G0300011475.01;PaF106G0800030362.01;PaF106G0800030303.01;PaF106G0400015096.01;PaF106G0400018312.01;PaF106G0500019165.01;PaF106G0300012459.01;PaF106G0600025100.01;PaF106G0100006574.01;PaF106G0500019797.01;PaF106G0100003419.01;…
GO:0015630	microtubule cytoskeleton	27	-0.275761	-0.751994	0.813278	1	5365	PaF106G0200009867.01;PaF106G0400017682.01;PaF106G0100003234.01;PaF106G0200010692.01;PaF106G0100005714.01;PaF106G0100004810.01;PaF106G0600023689.01;PaF106G0100000393.01;PaF106G0500020697.01;PaF106G0300011178.01;PaF106G0100005229.01
GO:0009534	chloroplast thylakoid	43	0.266064	0.778364	0.815686	1	5326	PaF106G0400017389.01;PaF106G0300013257.01;PaF106G0100000058.01;PaF106G0200010766.01;PaF106G0400018265.01;PaF106G0100005360.01;PaF106G0800032084.01;PaF106G0100001646.01;PaF106G0100002888.01;PaF106G0600023740.01;PaF106G0200009848.01;PaF106G0800030466.01;PaF106G0600022205.01
GO:0031410	cytoplasmic vesicle	28	-0.279243	-0.760853	0.819876	1	2093	PaF106G0300013131.01;PaF106G0100005270.01;PaF106G0100005545.01;PaF106G0600023327.01;PaF106G0400016240.01
GO:0098588	bounding membrane of organelle	25	0.29342	0.766562	0.824299	1	5751	PaF106G0400016284.01;Prunus_sibirica_newGene_1434;PaF106G0200010360.01;PaF106G0200008889.01;PaF106G0100001416.01;PaF106G0800029453.01;PaF106G0500020674.01;PaF106G0600025282.01;PaF106G0600023740.01;PaF106G0200010613.01;PaF106G0500020378.01;PaF106G0100002155.01
GO:1990904	ribonucleoprotein complex	55	-0.250057	-0.778931	0.827586	1	6574	PaF106G0700027642.01;PaF106G0400014991.01;PaF106G0100006633.01;PaF106G0400016616.01;PaF106G0500020926.01;PaF106G0100004907.01;PaF106G0100000819.01;PaF106G0400016617.01;PaF106G0400017939.01;PaF106G0200010888.01;PaF106G0600021536.01;PaF106G0600022526.01;PaF106G0300011126.01;PaF106G0800029759.01;PaF106G0300012246.01;PaF106G0100002925.01;PaF106G0100006034.01;PaF106G0500021323.01;PaF106G0800029514.01
GO:0005852	eukaryotic translation initiation factor 3 complex	15	0.306282	0.718565	0.837338	1	3622	PaF106G0700028070.01;PaF106G0700028094.01;PaF106G0300011620.01
GO:0120025	plasma membrane bounded cell projection	12	-0.306728	-0.699872	0.845511	1	4425	PaF106G0200009867.01;PaF106G0800029865.01;PaF106G0300011048.01;PaF106G0400016478.01;Prunus_sibirica_newGene_1930
GO:0031974	membrane-enclosed lumen	92	0.240928	0.813721	0.848659	1	1295	Prunus_sibirica_newGene_167;PaF106G0800030114.01;PaF106G0600024841.01;Prunus_sibirica_newGene_1207;PaF106G0500021297.01;PaF106G0100000204.01;PaF106G0800029684.01
GO:0043233	organelle lumen	92	0.240928	0.813721	0.848659	1	1295	Prunus_sibirica_newGene_167;PaF106G0800030114.01;PaF106G0600024841.01;Prunus_sibirica_newGene_1207;PaF106G0500021297.01;PaF106G0100000204.01;PaF106G0800029684.01
GO:0070013	intracellular organelle lumen	92	0.240928	0.813721	0.848659	1	1295	Prunus_sibirica_newGene_167;PaF106G0800030114.01;PaF106G0600024841.01;Prunus_sibirica_newGene_1207;PaF106G0500021297.01;PaF106G0100000204.01;PaF106G0800029684.01
GO:0019898	extrinsic component of membrane	31	-0.260198	-0.730801	0.859184	1	3002	PaF106G0100003320.01;PaF106G0600025385.01;PaF106G0100004031.01;PaF106G0400014798.01;PaF106G0100004066.01
GO:0071011	precatalytic spliceosome	16	0.289418	0.690354	0.859287	1	4506	PaF106G0600022030.01;PaF106G0100006543.01;PaF106G0100002878.01;PaF106G0400016490.01
GO:0019005	SCF ubiquitin ligase complex	43	0.252726	0.739343	0.860784	1	4622	PaF106G0300011024.01;PaF106G0600021737.01;PaF106G0100005656.01;PaF106G0700026745.01;PaF106G0300012465.01;PaF106G0600021914.01;PaF106G0400017027.01;PaF106G0600022565.01;PaF106G0700027761.01;PaF106G0100003259.01;PaF106G0800029493.01;PaF106G0500019888.01
GO:0005819	spindle	15	-0.293024	-0.686506	0.867679	1	2356	PaF106G0100003998.01;PaF106G0200010367.01;PaF106G0300013006.01;PaF106G0300011561.01;PaF106G0200008738.01
GO:0031984	organelle subcompartment	42	0.251804	0.73425	0.871094	1	1103	PaF106G0400017389.01;PaF106G0300013257.01;PaF106G0100000058.01
GO:0016282	eukaryotic 43S preinitiation complex	15	0.293233	0.687951	0.874307	1	3622	PaF106G0700028070.01;PaF106G0700028094.01;PaF106G0300011620.01
GO:0005783	endoplasmic reticulum	170	-0.22315	-0.825325	0.874743	1	713	PaF106G0800030195.01;PaF106G0700027940.01;PaF106G0500018911.01;PaF106G0500018912.01;PaF106G0800029279.01
GO:0044434	chloroplast part	70	-0.2415	-0.781134	0.874747	1	3058	PaF106G0600023304.01;PaF106G0200009472.01;PaF106G0600021529.01;PaF106G0500019142.01;PaF106G0300012622.01;PaF106G0400015716.01;PaF106G0400015745.01;PaF106G0300014343.01;PaF106G0100003621.01;PaF106G0600024594.01;PaF106G0100004232.01;PaF106G0800030117.01;PaF106G0400018285.01;PaF106G0200010116.01;PaF106G0700027037.01;PaF106G0500019381.01;PaF106G0100004031.01;PaF106G0700028768.01;PaF106G0600023422.01;…
GO:0044435	plastid part	70	-0.2415	-0.781134	0.874747	1	3058	PaF106G0600023304.01;PaF106G0200009472.01;PaF106G0600021529.01;PaF106G0500019142.01;PaF106G0300012622.01;PaF106G0400015716.01;PaF106G0400015745.01;PaF106G0300014343.01;PaF106G0100003621.01;PaF106G0600024594.01;PaF106G0100004232.01;PaF106G0800030117.01;PaF106G0400018285.01;PaF106G0200010116.01;PaF106G0700027037.01;PaF106G0500019381.01;PaF106G0100004031.01;PaF106G0700028768.01;PaF106G0600023422.01;…
GO:0017119	Golgi transport complex	11	0.301912	0.657165	0.876426	1	13556	PaF106G0200008021.01;PaF106G0100004796.01;PaF106G0800030873.01;PaF106G0500020280.01;PaF106G0400018087.01;PaF106G0200009328.01;PaF106G0200010284.01;PaF106G0300012498.01;PaF106G0400016881.01;PaF106G0100000891.01;PaF106G0100006654.01
GO:0005938	cell cortex	18	-0.284883	-0.703426	0.877339	1	5948	PaF106G0300013131.01;PaF106G0100005714.01;PaF106G0600023689.01;PaF106G0100000393.01;PaF106G0800031267.01;PaF106G0100005229.01
GO:0033290	eukaryotic 48S preinitiation complex	16	0.276789	0.660228	0.878049	1	3622	PaF106G0700028070.01;PaF106G0700028094.01;PaF106G0300011620.01
GO:0099513	polymeric cytoskeletal fiber	13	-0.294443	-0.673454	0.879237	1	6619	PaF106G0200009867.01;PaF106G0400017682.01;PaF106G0100005714.01;PaF106G0100004810.01;PaF106G0600023689.01;PaF106G0100000393.01;PaF106G0100005229.01
GO:0042170	plastid membrane	13	0.285593	0.647355	0.884906	1	4809	PaF106G0200008889.01;PaF106G0100001416.01;PaF106G0500020504.01;PaF106G0500019536.01;PaF106G0300013141.01
GO:0005666	DNA-directed RNA polymerase III complex	21	0.274844	0.690004	0.887189	1	2429	PaF106G0100000267.01;PaF106G0500021354.01;PaF106G0400015246.01;PaF106G0700026730.01;PaF106G0200008361.01
GO:0030134	COPII-coated ER to Golgi transport vesicle	13	0.281763	0.638673	0.888679	1	6122	PaF106G0600024715.01;PaF106G0300011475.01;PaF106G0100006574.01;PaF106G0300012289.01;PaF106G0100005922.01;PaF106G0300012941.01
GO:0000178	exosome (RNase complex)	11	0.29406	0.640073	0.891635	1	1989	Prunus_sibirica_newGene_1207;PaF106G0300012207.01
GO:0031981	nuclear lumen	85	0.229183	0.766249	0.894434	1	1295	Prunus_sibirica_newGene_167;PaF106G0800030114.01;Prunus_sibirica_newGene_1207;PaF106G0500021297.01;PaF106G0100000204.01;PaF106G0800029684.01
GO:0000502	proteasome complex	15	-0.275944	-0.646491	0.908894	1	3653	PaF106G0300011263.01;PaF106G0800030596.01;PaF106G0800031269.01;PaF106G0200009933.01;PaF106G0600021757.01;PaF106G0100003346.01;PaF106G0600022526.01;PaF106G0500018638.01
GO:0005802	trans-Golgi network	77	-0.223671	-0.737314	0.917695	1	3862	PaF106G0500018809.01;PaF106G0100005545.01;PaF106G0500018448.01;PaF106G0700027005.01;PaF106G0500019031.01;PaF106G0200009938.01;PaF106G0400016601.01;PaF106G0100004487.01;PaF106G0300011285.01;PaF106G0600023327.01;PaF106G0100000039.01;PaF106G0400015909.01;PaF106G0600021666.01;PaF106G0400016240.01;PaF106G0100003337.01
GO:0000151	ubiquitin ligase complex	65	0.228971	0.722386	0.927022	1	4513	PaF106G0300011024.01;PaF106G0500021297.01;PaF106G0600021737.01;PaF106G0100005656.01;PaF106G0300011567.01;PaF106G0500019123.01;PaF106G0300012465.01;PaF106G0400017027.01;PaF106G0600022008.01;PaF106G0300013002.01;PaF106G0600022565.01;PaF106G0100003259.01;PaF106G0800030543.01;PaF106G0800029493.01;PaF106G0100004186.01
GO:0099081	supramolecular polymer	16	-0.26317	-0.628133	0.929638	1	6619	PaF106G0200009867.01;PaF106G0400017682.01;PaF106G0100005714.01;PaF106G0100004810.01;PaF106G0600023689.01;PaF106G0100000393.01;PaF106G0300011048.01;PaF106G0100005229.01
GO:0099512	supramolecular fiber	16	-0.26317	-0.628133	0.929638	1	6619	PaF106G0200009867.01;PaF106G0400017682.01;PaF106G0100005714.01;PaF106G0100004810.01;PaF106G0600023689.01;PaF106G0100000393.01;PaF106G0300011048.01;PaF106G0100005229.01
GO:0098805	whole membrane	27	0.252012	0.667835	0.930769	1	5751	PaF106G0400016284.01;Prunus_sibirica_newGene_1434;PaF106G0200010360.01;PaF106G0200008889.01;PaF106G0100001416.01;PaF106G0800029453.01;PaF106G0500020674.01;PaF106G0600025282.01;PaF106G0600023740.01;PaF106G0200010613.01;PaF106G0500020378.01;PaF106G0100002155.01
GO:0099080	supramolecular complex	17	-0.251169	-0.610724	0.933054	1	6619	PaF106G0200009867.01;PaF106G0400017682.01;PaF106G0100005714.01;PaF106G0100004810.01;PaF106G0600023689.01;PaF106G0100000393.01;PaF106G0300011048.01;PaF106G0100005229.01
GO:0000145	exocyst	22	0.236055	0.601987	0.950851	1	5055	PaF106G0100003180.01;PaF106G0800029945.01;PaF106G0100002696.01;PaF106G0200009684.01;PaF106G0700027987.01;PaF106G0400014783.01;PaF106G0100003325.01
GO:0009654	photosystem II oxygen evolving complex	20	-0.235621	-0.593608	0.951579	1	3002	PaF106G0800032704.01;PaF106G0300014496.01;PaF106G0100003320.01;PaF106G0400014798.01;PaF106G0100004066.01
GO:0005654	nucleoplasm	80	-0.211796	-0.703081	0.956432	1	4516	PaF106G0200009155.01;PaF106G0200009220.01;PaF106G0100006133.01;PaF106G0100003680.01;PaF106G0700027232.01;PaF106G0600021536.01;PaF106G0700028484.01;PaF106G0600025171.01;PaF106G0200010019.01;PaF106G0800032140.01;PaF106G0400014772.01;PaF106G0300012246.01;PaF106G0400017472.01;PaF106G0600025144.01;PaF106G0800029665.01;PaF106G0400018443.01;PaF106G0300013006.01;PaF106G0200008259.01;PaF106G0500020950.01;…
GO:0005741	mitochondrial outer membrane	10	0.260513	0.556949	0.956848	1	14359	PaF106G0600024195.01;PaF106G0100004953.01;PaF106G0400014955.01;PaF106G0300011384.01;PaF106G0600023035.01;PaF106G0700028633.01;PaF106G0100003220.01;PaF106G0400015106.01;PaF106G0100001023.01;PaF106G0100004130.01
GO:0009579	thylakoid	48	0.209592	0.629633	0.961686	1	5326	PaF106G0400017389.01;PaF106G0300013257.01;PaF106G0100000058.01;PaF106G0200009337.01;PaF106G0600022211.01;PaF106G0500020254.01;PaF106G0100005360.01;PaF106G0800029453.01;PaF106G0100001646.01;PaF106G0100002888.01;PaF106G0600023740.01;PaF106G0600024310.01;PaF106G0600022205.01
GO:0000148	1,3-beta-D-glucan synthase complex	10	0.257564	0.550644	0.962477	1	6320	PaF106G0300012501.01;PaF106G0200006820.01;PaF106G0500020338.01;PaF106G0300012987.01;PaF106G0400014915.01
GO:0015629	actin cytoskeleton	19	0.23653	0.586126	0.964083	1	5623	PaF106G0100004118.01;PaF106G0500019646.01;PaF106G0100000481.01;PaF106G0100000646.01;PaF106G0200008940.01;PaF106G0800029879.01;PaF106G0800030837.01;PaF106G0600023885.01
GO:0005681	spliceosomal complex	31	-0.215966	-0.60657	0.971429	1	7332	PaF106G0500018714.01;PaF106G0700025944.01;Prunus_sibirica_newGene_21;PaF106G0400016874.01;PaF106G0100002819.01;PaF106G0600025306.01;PaF106G0700027892.01;PaF106G0200009274.01;PaF106G0100000819.01;PaF106G0700027760.01;PaF106G0100001114.01;PaF106G0300014480.01;PaF106G0100002787.01;PaF106G0700027682.01
GO:0042644	chloroplast nucleoid	12	-0.217911	-0.497213	0.974948	1	886	PaF106G0100003449.01;PaF106G0800029939.01;PaF106G0200010198.01
GO:0044429	mitochondrial part	11	0.247313	0.538321	0.975285	1	3438	PaF106G0200010136.01;PaF106G0100001416.01
GO:0005685	U1 snRNP	13	-0.230201	-0.526519	0.976695	1	7848	PaF106G0100006736.01;PaF106G0100001012.01;PaF106G0100004911.01;PaF106G0600025841.01;PaF106G0100001114.01;PaF106G0500020492.01;PaF106G0600025612.01
GO:0012505	endomembrane system	125	0.212366	0.740591	0.976744	1	6260	PaF106G0200010593.01;PaF106G0200010038.01;PaF106G0600024841.01;PaF106G0100006001.01;PaF106G0400016284.01;PaF106G0500021220.01;PaF106G0700028280.01;Prunus_sibirica_newGene_1434;PaF106G0600024435.01;PaF106G0200010360.01;PaF106G0400015300.01;PaF106G0500020460.01;PaF106G0600025386.01;PaF106G0600021931.01;PaF106G0200008021.01;PaF106G0400017702.01;PaF106G0100003899.01;PaF106G0100006002.01;PaF106G060002…
GO:0042995	cell projection	17	-0.207862	-0.505421	0.976987	1	6384	PaF106G0200009867.01;PaF106G0300013131.01;PaF106G0800029865.01;PaF106G0300011048.01;PaF106G0400016478.01;Prunus_sibirica_newGene_1930
GO:0009523	photosystem II	20	0.228252	0.571058	0.97723	1	3009	PaF106G0500020368.01;PaF106G0100002914.01;PaF106G0300012188.01
GO:0000124	SAGA complex	10	-0.215832	-0.47173	0.982942	1	15227	PaF106G0300014177.01;PaF106G0700027777.01
GO:0031201	SNARE complex	22	-0.204105	-0.527399	0.983087	1	15457	PaF106G0200009941.01;PaF106G0200008602.01;PaF106G0500020824.01;PaF106G0400015701.01;PaF106G0200010063.01;PaF106G0400017090.01;PaF106G0300013520.01;PaF106G0700028009.01;PaF106G0300011482.01;PaF106G0700029195.01;PaF106G0100005394.01;PaF106G0200008346.01;PaF106G0100003345.01;PaF106G0600024370.01;PaF106G0300010913.01;PaF106G0700027237.01;PaF106G0200008793.01;PaF106G0700026429.01;PaF106G0800031453.01;…
GO:0005768	endosome	66	-0.192901	-0.621925	0.987854	1	4025	PaF106G0500018809.01;PaF106G0100005545.01;PaF106G0500019031.01;PaF106G0200009938.01;PaF106G0400016601.01;PaF106G0100004487.01;PaF106G0300011285.01;PaF106G0600024923.01;PaF106G0600023327.01;PaF106G0400016240.01
GO:0031461	cullin-RING ubiquitin ligase complex	51	0.191286	0.577235	0.990253	1	4513	PaF106G0300011024.01;PaF106G0600021737.01;PaF106G0100005656.01;PaF106G0500019123.01;PaF106G0300012465.01;PaF106G0400017027.01;PaF106G0600022565.01;PaF106G0100003259.01;PaF106G0800030543.01;PaF106G0800029493.01;PaF106G0100004186.01
GO:0005856	cytoskeleton	46	-0.185371	-0.555167	0.991701	1	6351	PaF106G0400017682.01;PaF106G0700026534.01;PaF106G0100000165.01;PaF106G0300013131.01;PaF106G0100003234.01;PaF106G0200010692.01;PaF106G0100005714.01;PaF106G0100004810.01;PaF106G0600023689.01;PaF106G0100000393.01;PaF106G0300011048.01;PaF106G0500020697.01;PaF106G0800031267.01;PaF106G0300011178.01;PaF106G0100005229.01
GO:0005777	peroxisome	55	-0.172331	-0.536812	0.995943	1	5672	PaF106G0300013860.01;PaF106G0400015106.01;PaF106G0100006470.01;PaF106G0700028345.01;PaF106G0800030333.01;PaF106G0500019033.01;PaF106G0500018779.01;PaF106G0600023390.01;PaF106G0400017347.01;PaF106G0700026666.01;PaF106G0400015116.01;PaF106G0300014431.01
GO:0000159	protein phosphatase type 2A complex	15	0.170112	0.399098	0.996303	1	16114	PaF106G0100002845.01;PaF106G0500020522.01;PaF106G0700027622.01;PaF106G0300011086.01;PaF106G0500021093.01;PaF106G0100004860.01;PaF106G0100006005.01;PaF106G0300014018.01;PaF106G0100003667.01;PaF106G0800029920.01;PaF106G0700026336.01;PaF106G0100005401.01;PaF106G0300012074.01;PaF106G0100002844.01;PaF106G0800030551.01
GO:0009707	chloroplast outer membrane	16	-0.175298	-0.4184	0.997868	1	5143	PaF106G0600022300.01;PaF106G0600023149.01;PaF106G0400017662.01;PaF106G0100004031.01
GO:0044446	intracellular organelle part	227	0.183137	0.690019	0.998069	1	1488	Prunus_sibirica_newGene_167;PaF106G0200010593.01;PaF106G0800030114.01;PaF106G0400017389.01;PaF106G0300013257.01;PaF106G0600024841.01;PaF106G0600024398.01;PaF106G0700027967.01;Prunus_sibirica_newGene_1207;PaF106G0100000058.01;PaF106G0500021297.01;PaF106G0100000204.01;PaF106G0400016284.01;PaF106G0800029684.01;Prunus_sibirica_newGene_1434
GO:0044452	nucleolar part	13	0.175108	0.396919	0.998113	1	4252	PaF106G0500019123.01;PaF106G0400018327.01;PaF106G0400015548.01
GO:0005739	mitochondrion	329	0.157814	0.625509	1	1	2142	PaF106G0800030462.01;PaF106G0400016106.01;PaF106G0600022481.01;PaF106G0800031748.01;PaF106G0200006908.01;PaF106G0800029367.01;PaF106G0100000807.01;PaF106G0500020945.01;PaF106G0200009736.01;PaF106G0200009036.01;Prunus_sibirica_newGene_1189;PaF106G0100001313.01;PaF106G0800030376.01;PaF106G0200008241.01;PaF106G0300011725.01;PaF106G0400016228.01;PaF106G0400014694.01;PaF106G0100005764.01;PaF106G080002…
GO:0005794	Golgi apparatus	227	-0.17274	-0.660375	1	1	4467	PaF106G0600024911.01;PaF106G0800032684.01;PaF106G0300012988.01;PaF106G0700027639.01;PaF106G0200009991.01;PaF106G0600023689.01;PaF106G0200006971.01;PaF106G0500020957.01;PaF106G0100005545.01;PaF106G0500018448.01;PaF106G0200009305.01;PaF106G0300011048.01;PaF106G0400018173.01;PaF106G0500019031.01;PaF106G0400017306.01;PaF106G0700028946.01;PaF106G0100002441.01;PaF106G0500018527.01;PaF106G0100001300.01;…
GO:0032991	macromolecular complex	139	0.181539	0.645028	1	1	4379	Prunus_sibirica_newGene_167;PaF106G0300011024.01;PaF106G0800030114.01;Prunus_sibirica_newGene_1207;PaF106G0500021297.01;PaF106G0600021737.01;PaF106G0500018620.01;PaF106G0300012207.01;PaF106G0100005656.01;PaF106G0300011567.01;PaF106G0500019123.01;PaF106G0300012465.01;PaF106G0200008021.01;PaF106G0400017027.01;PaF106G0100001416.01;PaF106G0700026415.01;PaF106G0400018327.01;PaF106G0300013002.01;PaF106…
GO:0044422	organelle part	230	0.180181	0.680319	1	1	1488	Prunus_sibirica_newGene_167;PaF106G0200010593.01;PaF106G0800030114.01;PaF106G0400017389.01;PaF106G0300013257.01;PaF106G0600024841.01;PaF106G0600024398.01;PaF106G0700027967.01;Prunus_sibirica_newGene_1207;PaF106G0100000058.01;PaF106G0500021297.01;PaF106G0100000204.01;PaF106G0400016284.01;PaF106G0800029684.01;Prunus_sibirica_newGene_1434
GO:0044444	cytoplasmic part	402	-0.185268	-0.754429	1	1	4467	PaF106G0400017253.01;PaF106G0100000854.01;PaF106G0600021529.01;PaF106G0400015883.01;PaF106G0200008020.01;PaF106G0500019142.01;PaF106G0600022490.01;PaF106G0100006270.01;PaF106G0600023689.01;PaF106G0800031541.01;PaF106G0500019033.01;PaF106G0500018973.01;PaF106G0300012622.01;PaF106G0300010981.01;PaF106G0100000393.01;PaF106G0200010051.01;PaF106G0100005545.01;PaF106G0400015716.01;PaF106G0300011048.01;…

## Sheet: Molecular Function
Table S11 GSEA analysis based on GO functional classification in P. sibirica
ID	Description	setSize	enrichmentScore	NES	pvalue	qvalue	rank	core_enrichment
GO:0004674	protein serine/threonine kinase activity	362	0.398728	1.58168	0.00184162	0.0812608	3044	PaF106G0400018013.01;PaF106G0400018019.01;PaF106G0300011925.01;Prunus_sibirica_newGene_267;PaF106G0100000980.01;PaF106G0400017975.01;PaF106G0600021559.01;PaF106G0600021563.01;PaF106G0800030782.01;PaF106G0400016677.01;PaF106G0300011917.01;PaF106G0600021566.01;PaF106G0400017987.01;PaF106G0300011919.01;PaF106G0400017491.01;PaF106G0400016680.01;PaF106G0400017172.01;PaF106G0300013592.01;PaF106G0100002…
GO:0043531	ADP binding	308	0.524186	2.04785	0.0018622	0.0812608	1258	PaF106G0700028369.01;Prunus_sibirica_newGene_1339;PaF106G0200007544.01;PaF106G0800032652.01;PaF106G0800032588.01;PaF106G0700028364.01;PaF106G0400014852.01;PaF106G0800031206.01;Prunus_sibirica_newGene_1338;PaF106G0700028373.01;PaF106G0800032487.01;PaF106G0700028365.01;PaF106G0800032547.01;PaF106G0100000157.01;PaF106G0800030461.01;PaF106G0800032447.01;PaF106G0200008433.01;PaF106G0800032875.01;PaF10…
GO:0003860	3-hydroxyisobutyryl-CoA hydrolase activity	13	0.874	1.96479	0.00191571	0.0812608	1372	PaF106G0200007106.01;PaF106G0700029083.01;PaF106G0800032469.01;PaF106G0600023307.01;PaF106G0200009439.01;PaF106G0200009442.01;PaF106G0400016830.01
GO:0010333	terpene synthase activity	14	-0.873159	-2.00398	0.00209205	0.0812608	1646	PaF106G0400015860.01;PaF106G0400016816.01;PaF106G0400015872.01;PaF106G0400016817.01;PaF106G0300011959.01;PaF106G0400015902.01;PaF106G0400015900.01
GO:0004519	endonuclease activity	241	-0.401703	-1.53491	0.00211864	0.0812608	5920	PaF106G0100003733.01;PaF106G0100005404.01;PaF106G0600024446.01;PaF106G0700028686.01;PaF106G0300014508.01;PaF106G0800031225.01;PaF106G0100006732.01;PaF106G0600022391.01;PaF106G0200008038.01;PaF106G0300011161.01;PaF106G0400015021.01;PaF106G0400017996.01;PaF106G0200007558.01;PaF106G0800032683.01;PaF106G0200010668.01;PaF106G0800030541.01;PaF106G0300014347.01;Prunus_sibirica_newGene_2008;PaF106G050002…
GO:0003690	double-stranded DNA binding	65	-0.555207	-1.78585	0.00212766	0.0812608	5921	PaF106G0100000290.01;PaF106G0700026554.01;PaF106G0700026481.01;PaF106G0100002086.01;PaF106G0200007446.01;PaF106G0300014086.01;PaF106G0400016682.01;PaF106G0200007301.01;PaF106G0200008811.01;PaF106G0100002106.01;PaF106G0200007623.01;PaF106G0700027141.01;PaF106G0400017034.01;PaF106G0200009220.01;PaF106G0700028207.01;PaF106G0800032062.01;PaF106G0400016683.01;PaF106G0100003863.01;PaF106G0300014311.01;…
GO:0016747	transferase activity, transferring acyl groups other than amino-acyl groups	91	-0.542027	-1.83575	0.00215054	0.0812608	1864	PaF106G0400016592.01;PaF106G0600022026.01;PaF106G0300013446.01;PaF106G0200009682.01;PaF106G0300011595.01;PaF106G0600025606.01;PaF106G0300013455.01;PaF106G0100005459.01;PaF106G0200010531.01;PaF106G0100004614.01;PaF106G0200009680.01;PaF106G0400016586.01;PaF106G0400016584.01;PaF106G0200007469.01;PaF106G0300013190.01;PaF106G0800030813.01;PaF106G0100001890.01;PaF106G0500018681.01;PaF106G0800030809.01;…
GO:0016788	hydrolase activity, acting on ester bonds	294	-0.379815	-1.47732	0.0021978	0.0812608	4324	PaF106G0200007648.01;PaF106G0700027229.01;PaF106G0300010898.01;PaF106G0500020659.01;PaF106G0100006339.01;PaF106G0700026757.01;PaF106G0300011827.01;PaF106G0100001324.01;PaF106G0400016995.01;PaF106G0300012483.01;PaF106G0100005749.01;PaF106G0500018973.01;PaF106G0700027018.01;PaF106G0500021314.01;PaF106G0100004643.01;PaF106G0800032204.01;PaF106G0700027079.01;PaF106G0200010571.01;PaF106G0100005687.01;…
GO:0000287	magnesium ion binding	93	-0.455401	-1.54862	0.00641026	0.210676	3924	PaF106G0800032744.01;PaF106G0400016772.01;PaF106G0100001620.01;PaF106G0100000316.01;PaF106G0400017670.01;PaF106G0800030761.01;PaF106G0100001688.01;PaF106G0500021009.01;PaF106G0300012520.01;PaF106G0600025144.01;PaF106G0600024863.01;PaF106G0200010617.01;PaF106G0500021017.01;PaF106G0600023366.01;PaF106G0200007805.01;PaF106G0400015860.01;PaF106G0500020845.01;PaF106G0500019661.01;PaF106G0100004499.01;…
GO:0004518	nuclease activity	245	-0.370836	-1.41587	0.00860215	0.254443	5920	PaF106G0100003733.01;PaF106G0100005404.01;PaF106G0600024446.01;PaF106G0700028686.01;PaF106G0300014508.01;PaF106G0100000165.01;PaF106G0100006732.01;PaF106G0600022391.01;PaF106G0200008038.01;PaF106G0300011161.01;PaF106G0400015021.01;PaF106G0400017996.01;PaF106G0200007558.01;PaF106G0800032683.01;PaF106G0200010668.01;PaF106G0800030541.01;PaF106G0300014347.01;Prunus_sibirica_newGene_2008;PaF106G050002…
GO:0004650	polygalacturonase activity	37	-0.581133	-1.67863	0.0100402	0.269979	359	PaF106G0300012164.01;PaF106G0100003015.01;PaF106G0200010558.01;PaF106G0300012156.01;PaF106G0300012161.01;PaF106G0300012159.01
GO:0003887	DNA-directed DNA polymerase activity	20	-0.678961	-1.69349	0.0122951	0.303063	2484	PaF106G0100003128.01;Prunus_sibirica_newGene_521;Prunus_sibirica_newGene_1393;PaF106G0500020376.01;PaF106G0800032113.01;PaF106G0200010567.01
GO:0005516	calmodulin binding	60	0.513271	1.59251	0.0150943	0.331417	4477	PaF106G0100000841.01;PaF106G0600022540.01;PaF106G0600022837.01;PaF106G0700026035.01;PaF106G0600022539.01;PaF106G0200008200.01;PaF106G0100000837.01;PaF106G0200007116.01;PaF106G0500021133.01;PaF106G0600024196.01;PaF106G0600023814.01;PaF106G0700027100.01;PaF106G0100004242.01;PaF106G0400017941.01;PaF106G0500019560.01;PaF106G0600025313.01;PaF106G0100004957.01;PaF106G0700025901.01;PaF106G0300014448.01;…
GO:0004144	diacylglycerol O-acyltransferase activity	12	-0.749887	-1.64638	0.016632	0.331417	1280	PaF106G0300013020.01;PaF106G0700027731.01;PaF106G0400015123.01;PaF106G0800031033.01;PaF106G0300013009.01;PaF106G0300013014.01
GO:0016627	oxidoreductase activity, acting on the CH-CH group of donors	16	-0.684411	-1.61784	0.0168067	0.331417	1334	PaF106G0800031456.01;PaF106G0200007737.01;PaF106G0700028234.01;PaF106G0200007733.01
GO:0003697	single-stranded DNA binding	40	-0.496162	-1.44317	0.0333333	0.517632	4919	PaF106G0200008811.01;PaF106G0100002106.01;PaF106G0400017020.01;PaF106G0200009623.01;PaF106G0300011432.01;PaF106G0600025290.01;PaF106G0100002579.01;PaF106G0800032899.01;PaF106G0400017116.01;PaF106G0100001998.01;PaF106G0400018191.01;PaF106G0800030622.01;PaF106G0100005353.01;PaF106G0400017398.01;PaF106G0800029282.01;PaF106G0800031521.01;PaF106G0800031844.01;PaF106G0500019883.01;PaF106G0300012100.01;…
GO:1901363	heterocyclic compound binding	315	-0.324733	-1.27954	0.0350877	0.517632	5602	PaF106G0600022391.01;PaF106G0200008038.01;PaF106G0300011161.01;PaF106G0400015021.01;PaF106G0400017996.01;PaF106G0200007558.01;PaF106G0800032683.01;PaF106G0200010668.01;PaF106G0800030541.01;PaF106G0100000819.01;PaF106G0300014347.01;Prunus_sibirica_newGene_2008;PaF106G0500021221.01;PaF106G0100005364.01;PaF106G0100000752.01;Prunus_sibirica_newGene_650;PaF106G0700026262.01;PaF106G0300012405.01;PaF106…
GO:0016301	kinase activity	109	0.407068	1.39053	0.035514	0.517632	1032	PaF106G0500019567.01;PaF106G0100006528.01;PaF106G0100000829.01;Prunus_sibirica_newGene_2371;Prunus_sibirica_newGene_726;Prunus_sibirica_newGene_862;PaF106G0500018593.01;Prunus_sibirica_newGene_1332;PaF106G0300011223.01;PaF106G0600024874.01;PaF106G0300012869.01;PaF106G0200010276.01
GO:0004089	carbonate dehydratase activity	14	0.680149	1.563	0.0362595	0.517632	1503	PaF106G0800032576.01;PaF106G0800032573.01;PaF106G0400015048.01;PaF106G0700027626.01;PaF106G0700027627.01;PaF106G0100006107.01
GO:0016702	oxidoreductase activity, acting on single donors with incorporation of molecular oxygen, incorporation of two atoms of oxygen	22	-0.597515	-1.51322	0.0375	0.517632	2455	PaF106G0600021579.01;PaF106G0600025402.01;PaF106G0600025399.01;PaF106G0100003084.01;PaF106G0100002824.01;PaF106G0600025400.01;PaF106G0600025398.01;PaF106G0200006848.01;PaF106G0200006845.01;PaF106G0200006844.01
GO:0052716	hydroquinone:oxygen oxidoreductase activity	15	-0.657161	-1.52434	0.0401691	0.517632	624	PaF106G0200010042.01;PaF106G0800032256.01;PaF106G0600022226.01;PaF106G0800032257.01
GO:0097159	organic cyclic compound binding	317	-0.320403	-1.26285	0.0419426	0.517632	4324	PaF106G0600022391.01;PaF106G0200008038.01;PaF106G0300011161.01;PaF106G0400015021.01;PaF106G0400017996.01;PaF106G0200007558.01;PaF106G0800032683.01;PaF106G0200010668.01;PaF106G0800030541.01;PaF106G0100000819.01;PaF106G0300014347.01;Prunus_sibirica_newGene_2008;PaF106G0500021221.01;PaF106G0100005364.01;PaF106G0100000752.01;Prunus_sibirica_newGene_650;PaF106G0700026262.01;PaF106G0300012405.01;PaF106…
GO:0000250	lanosterol synthase activity	10	-0.742822	-1.58016	0.0430328	0.517632	4441	PaF106G0300014298.01;PaF106G0300014304.01;PaF106G0300014303.01;PaF106G0100000027.01;PaF106G0300014296.01;PaF106G0300014306.01;PaF106G0300014305.01
GO:0042300	beta-amyrin synthase activity	10	-0.742822	-1.58016	0.0430328	0.517632	4441	PaF106G0300014298.01;PaF106G0300014304.01;PaF106G0300014303.01;PaF106G0100000027.01;PaF106G0300014296.01;PaF106G0300014306.01;PaF106G0300014305.01
GO:0031386	protein tag	13	-0.679911	-1.52382	0.04375	0.517632	1386	PaF106G0400015608.01;PaF106G0100000133.01;PaF106G0100003029.01;PaF106G0100000111.01
GO:0004185	serine-type carboxypeptidase activity	30	-0.533338	-1.44212	0.0488323	0.555541	2591	PaF106G0800030807.01;PaF106G0600022758.01;PaF106G0100002658.01;PaF106G0500020180.01;PaF106G0100006505.01;PaF106G0800030808.01;PaF106G0200007075.01;PaF106G0200007074.01;PaF106G0800030813.01;PaF106G0800030809.01
GO:0101005	ubiquitinyl hydrolase activity	11	0.695079	1.49351	0.0528376	0.564484	539	PaF106G0100001269.01;PaF106G0100001268.01
GO:0005388	calcium-transporting ATPase activity	16	0.635475	1.5006	0.0570342	0.564484	4172	PaF106G0100000835.01;PaF106G0700028478.01;PaF106G0100000304.01;PaF106G0100000299.01;PaF106G0100000301.01;PaF106G0200007116.01;PaF106G0600024196.01;PaF106G0800029731.01;PaF106G0100004957.01;PaF106G0400018360.01;PaF106G0700028479.01;PaF106G0300014413.01
GO:0004864	protein phosphatase inhibitor activity	24	-0.558886	-1.4518	0.0578512	0.564484	5686	PaF106G0200010505.01;PaF106G0100001453.01;PaF106G0100001462.01;PaF106G0600024910.01;PaF106G0100001474.01;PaF106G0100001456.01;PaF106G0800032140.01;PaF106G0100001454.01;PaF106G0100001464.01;PaF106G0100001471.01;PaF106G0200010859.01;PaF106G0100001468.01
GO:0016787	hydrolase activity	469	-0.293272	-1.19765	0.059081	0.564484	4324	PaF106G0200007648.01;PaF106G0700027229.01;PaF106G0500020659.01;PaF106G0100006339.01;PaF106G0700026757.01;PaF106G0300011827.01;PaF106G0100001324.01;PaF106G0400016995.01;PaF106G0300012559.01;PaF106G0600022398.01;PaF106G0500018973.01;PaF106G0700027018.01;PaF106G0500021314.01;PaF106G0100004643.01;PaF106G0200010571.01;PaF106G0100006353.01;PaF106G0100005687.01;PaF106G0300010981.01;PaF106G0300012052.01;…
GO:0047262	polygalacturonate 4-alpha-galacturonosyltransferase activity	14	0.646828	1.48643	0.0591603	0.564484	4061	PaF106G0800032782.01;PaF106G0100002227.01;PaF106G0300012550.01;PaF106G0400015825.01;PaF106G0400018426.01;PaF106G0300011548.01
GO:0016798	hydrolase activity, acting on glycosyl bonds	10	-0.723278	-1.53858	0.0614754	0.568243	4734	PaF106G0100005082.01;PaF106G0300013586.01;PaF106G0500020853.01;PaF106G0500020912.01;PaF106G0200007123.01;PaF106G0400015116.01
GO:0015276	ligand-gated ion channel activity	25	0.56335	1.46632	0.0645161	0.578279	1332	PaF106G0200008171.01;PaF106G0100004696.01;PaF106G0400017690.01;PaF106G0400017686.01;PaF106G0100004692.01;PaF106G0400016192.01;PaF106G0400016187.01;PaF106G0200008176.01
GO:0043565	sequence-specific DNA binding	234	0.328217	1.24628	0.0672897	0.5854	4808	Prunus_sibirica_newGene_167;PaF106G0300011255.01;PaF106G0200008233.01;PaF106G0100004783.01;PaF106G0600024109.01;PaF106G0300013600.01;PaF106G0300011662.01;PaF106G0200010730.01;PaF106G0100001343.01;PaF106G0600024149.01;PaF106G0600023626.01;PaF106G0800029724.01;PaF106G0100005856.01;PaF106G0300013492.01;PaF106G0300011763.01;PaF106G0600024597.01;PaF106G0600024816.01;PaF106G0100004628.01;PaF106G0100003…
GO:0042626	ATPase activity, coupled to transmembrane movement of substances	71	0.409794	1.3063	0.0759259	0.621929	1738	PaF106G0400015437.01;PaF106G0100001225.01;PaF106G0100001230.01;PaF106G0800029996.01;Prunus_sibirica_newGene_1780;PaF106G0400015974.01;PaF106G0800029993.01;PaF106G0800029394.01;PaF106G0800029415.01;PaF106G0100001226.01;PaF106G0800029999.01;PaF106G0200008247.01;PaF106G0100004168.01
GO:0004497	monooxygenase activity	98	0.381081	1.29026	0.0781818	0.621929	1744	PaF106G0100002943.01;PaF106G0100002813.01;PaF106G0300012543.01;PaF106G0200007808.01;PaF106G0100004813.01;PaF106G0200007810.01;PaF106G0200010499.01;PaF106G0700027524.01;PaF106G0800031073.01;PaF106G0200007392.01;PaF106G0100002800.01;PaF106G0100003482.01;PaF106G0200008741.01;PaF106G0500020427.01;PaF106G0200008742.01;PaF106G0800030200.01;PaF106G0800030433.01;PaF106G0500018596.01;PaF106G0200008744.01;…
GO:0046983	protein dimerization activity	202	-0.325345	-1.225	0.0823293	0.621929	2268	PaF106G0800030516.01;PaF106G0300013145.01;PaF106G0500020044.01;Prunus_sibirica_newGene_1482;PaF106G0100005952.01;PaF106G0500019538.01;Prunus_sibirica_newGene_783;PaF106G0600022853.01;PaF106G0100005958.01;PaF106G0100002662.01;PaF106G0100006041.01;PaF106G0100003051.01;PaF106G0500018903.01;PaF106G0500020187.01;PaF106G0800030524.01;PaF106G0200010776.01;PaF106G0600022847.01;PaF106G0600023320.01;PaF106…
GO:0008017	microtubule binding	104	-0.370763	-1.27415	0.0844156	0.621929	4569	PaF106G0100004810.01;PaF106G0400015756.01;PaF106G0600025457.01;PaF106G0600024279.01;PaF106G0600023689.01;PaF106G0500020715.01;PaF106G0500019922.01;PaF106G0400015830.01;PaF106G0200010513.01;PaF106G0100000393.01;PaF106G0600025416.01;PaF106G0200010367.01;PaF106G0600023930.01;PaF106G0500019924.01;PaF106G0600022418.01;PaF106G0100004913.01;PaF106G0200007361.01;PaF106G0700026376.01;PaF106G0400017662.01;…
GO:0016413	O-acetyltransferase activity	26	-0.529162	-1.39417	0.0845987	0.621929	2294	PaF106G0300013374.01;PaF106G0600022026.01;PaF106G0400016382.01;PaF106G0200007843.01;PaF106G0300013190.01;PaF106G0400016381.01
GO:0046982	protein heterodimerization activity	64	-0.414628	-1.32814	0.0858369	0.621929	4571	PaF106G0800029527.01;PaF106G0800029743.01;PaF106G0100001775.01;PaF106G0400016856.01;PaF106G0600022353.01;Prunus_sibirica_newGene_1840;PaF106G0800029529.01;PaF106G0100005968.01;PaF106G0700027777.01;PaF106G0600022341.01;PaF106G0200009755.01;PaF106G0600022357.01;PaF106G0600024519.01;PaF106G0200009175.01;PaF106G0600025382.01;PaF106G0400017711.01;PaF106G0100002762.01;PaF106G0200009662.01;PaF106G060002…
GO:0017137	Rab GTPase binding	22	0.566759	1.42673	0.0862069	0.621929	2658	PaF106G0800031890.01;PaF106G0800031767.01;Prunus_sibirica_newGene_610;PaF106G0600024435.01;PaF106G0100002525.01;PaF106G0600023965.01
GO:0036459	thiol-dependent ubiquitinyl hydrolase activity	24	0.552344	1.41292	0.0888031	0.625405	539	PaF106G0100001269.01;Prunus_sibirica_newGene_1558;PaF106G0100001268.01
GO:0102499	SHG alpha-glucan phosphorylase activity	11	0.652052	1.40105	0.0939335	0.642199	924	PaF106G0600025876.01;PaF106G0500018645.01;PaF106G0500018648.01
GO:0008194	UDP-glycosyltransferase activity	114	0.367488	1.26269	0.0956848	0.642199	2495	PaF106G0200009060.01;PaF106G0800031015.01;PaF106G0300012327.01;PaF106G0800031023.01;PaF106G0800030767.01;PaF106G0600024001.01;PaF106G0300012319.01;Prunus_sibirica_newGene_155;PaF106G0300012326.01;PaF106G0100005824.01;PaF106G0800031024.01;PaF106G0800030952.01;PaF106G0300012314.01;PaF106G0200009065.01;PaF106G0100006404.01;PaF106G0300012375.01;PaF106G0300012374.01;PaF106G0600022156.01;PaF106G0300012…
GO:0019829	cation-transporting ATPase activity	13	0.626805	1.40909	0.0977011	0.642199	4484	PaF106G0100000304.01;PaF106G0100000301.01;PaF106G0600024196.01;PaF106G0800029731.01;PaF106G0100004957.01;PaF106G0700028479.01;PaF106G0300014413.01;PaF106G0400016919.01;PaF106G0100000936.01
GO:0010427	abscisic acid binding	21	-0.547776	-1.38486	0.1	0.643021	5686	PaF106G0100001453.01;PaF106G0100001462.01;PaF106G0600024910.01;PaF106G0100001474.01;PaF106G0100001456.01;PaF106G0100001454.01;PaF106G0100001464.01;PaF106G0100001471.01;PaF106G0200010859.01;PaF106G0100001468.01
GO:0044183	protein binding involved in protein folding	22	-0.534133	-1.3527	0.10625	0.668673	783	PaF106G0300012100.01;PaF106G0700027837.01;PaF106G0700027850.01
GO:0015171	amino acid transmembrane transporter activity	28	0.507537	1.35563	0.11236	0.691801	3526	PaF106G0100005692.01;PaF106G0400017268.01;PaF106G0100005690.01;PaF106G0100005695.01;PaF106G0100004197.01;PaF106G0100006299.01;PaF106G0100006254.01;PaF106G0100005188.01;PaF106G0200007769.01;PaF106G0600024754.01;PaF106G0400016457.01;PaF106G0400014781.01;PaF106G0100001416.01;PaF106G0800030399.01;PaF106G0500019862.01
GO:0004724	magnesium-dependent protein serine/threonine phosphatase activity	26	0.518663	1.36823	0.114603	0.691801	3553	PaF106G0700026694.01;PaF106G0700026499.01;PaF106G0600024563.01;PaF106G0600024228.01;PaF106G0200009994.01;PaF106G0400016075.01;PaF106G0200010701.01;PaF106G0100005100.01;PaF106G0700026938.01;PaF106G0100001301.01
GO:0005506	iron ion binding	194	0.320951	1.18278	0.120155	0.699975	2291	PaF106G0100002943.01;PaF106G0300012392.01;PaF106G0300012396.01;PaF106G0100002813.01;PaF106G0300012543.01;PaF106G0200007808.01;PaF106G0100001047.01;PaF106G0500020431.01;PaF106G0100002801.01;PaF106G0100004813.01;PaF106G0200007810.01;PaF106G0200010499.01;PaF106G0700027524.01;PaF106G0800031073.01;PaF106G0200007392.01;PaF106G0100002800.01;PaF106G0100003482.01;PaF106G0100002809.01;PaF106G0200008741.01;…
GO:0022857	transmembrane transporter activity	176	0.323274	1.17489	0.12069	0.699975	3537	PaF106G0100005775.01;PaF106G0100001815.01;PaF106G0100005506.01;PaF106G0400014797.01;PaF106G0400018334.01;PaF106G0200008647.01;PaF106G0100006536.01;PaF106G0700027621.01;PaF106G0500020100.01;PaF106G0100001823.01;PaF106G0100004383.01;PaF106G0600022338.01;PaF106G0100003100.01;PaF106G0100005778.01;PaF106G0500019350.01;PaF106G0600024539.01;PaF106G0600021476.01;PaF106G0200010534.01;PaF106G0600024735.01;…
GO:0003746	translation elongation factor activity	24	-0.508395	-1.32065	0.126033	0.716909	7572	PaF106G0800029601.01;PaF106G0700026443.01;PaF106G0100006709.01;PaF106G0100003359.01;PaF106G0600021417.01;PaF106G0500019388.01;PaF106G0200009553.01;PaF106G0100002268.01;PaF106G0300012798.01;PaF106G0300012560.01;PaF106G0400016616.01;PaF106G0400016617.01;PaF106G0800030600.01;PaF106G0600022515.01;PaF106G0100006341.01;PaF106G0600022519.01;PaF106G0600025022.01;PaF106G0100000142.01;PaF106G0300011142.01
GO:0004298	threonine-type endopeptidase activity	21	-0.534139	-1.35038	0.128571	0.717549	956	PaF106G0700027094.01;PaF106G0100002789.01;PaF106G0200008715.01;PaF106G0100006512.01;PaF106G0300011129.01;PaF106G0400016897.01;PaF106G0100005711.01;PaF106G0100004456.01;PaF106G0300012401.01;PaF106G0300014162.01;PaF106G0400016649.01;PaF106G0100000230.01;PaF106G0700028943.01;PaF106G0100001057.01;PaF106G0200010538.01
GO:0061631	ubiquitin conjugating enzyme activity	29	-0.477528	-1.28068	0.135307	0.735646	2370	PaF106G0700026994.01;PaF106G0400015143.01;PaF106G0100004522.01;PaF106G0500018911.01;PaF106G0500018912.01
GO:0008171	O-methyltransferase activity	29	-0.476425	-1.27773	0.137421	0.735646	1096	PaF106G0200010776.01;PaF106G0800030531.01;PaF106G0800030529.01;PaF106G0800030528.01;PaF106G0200009345.01;PaF106G0700026579.01;PaF106G0300013244.01;PaF106G0300013106.01;PaF106G0300013243.01
GO:0003777	microtubule motor activity	56	-0.399363	-1.24497	0.141393	0.735646	4054	PaF106G0200010513.01;PaF106G0600025416.01;PaF106G0600023930.01;PaF106G0600022418.01;PaF106G0100004913.01;PaF106G0700026376.01;PaF106G0100006121.01;PaF106G0100004282.01;PaF106G0800031230.01;PaF106G0700028460.01;PaF106G0700027895.01;PaF106G0600023185.01;PaF106G0600024568.01;PaF106G0600025553.01;PaF106G0400015516.01;PaF106G0400018008.01;PaF106G0600025458.01;PaF106G0100006122.01;PaF106G0600024508.01;…
GO:0035673	oligopeptide transmembrane transporter activity	13	0.596696	1.3414	0.141762	0.735646	1391	PaF106G0600024672.01;PaF106G0100003198.01;PaF106G0500020017.01;PaF106G0100003679.01;PaF106G0600024678.01
GO:0016491	oxidoreductase activity	292	-0.293068	-1.13715	0.15011	0.765536	2096	PaF106G0300012029.01;PaF106G0600023034.01;PaF106G0700026365.01;PaF106G0300011246.01;PaF106G0500019378.01;PaF106G0300014178.01;PaF106G0700027259.01;PaF106G0600024647.01;PaF106G0200008262.01;PaF106G0200008897.01;PaF106G0500019530.01;PaF106G0700025954.01;PaF106G0200007253.01;PaF106G0500019176.01;PaF106G0500018622.01;PaF106G0100003619.01;PaF106G0100000656.01;PaF106G0200009798.01;PaF106G0100004079.01;…
GO:0008324	cation transmembrane transporter activity	12	0.598092	1.3152	0.15739	0.788392	5150	PaF106G0600022175.01;PaF106G0400016733.01;PaF106G0200009699.01;PaF106G0600025441.01;PaF106G0500020087.01;PaF106G0700028176.01
GO:0000166	nucleotide binding	39	0.439587	1.2579	0.159923	0.788392	3041	PaF106G0800030462.01;PaF106G0400016106.01;PaF106G0500021277.01;PaF106G0700029232.01;PaF106G0100000267.01;PaF106G0500019140.01;PaF106G0100001867.01;PaF106G0100001383.01;PaF106G0200010202.01;PaF106G0300012189.01
GO:0046914	transition metal ion binding	21	-0.518377	-1.31053	0.165306	0.789086	4545	PaF106G0200009220.01;PaF106G0200010379.01;PaF106G0600024594.01;PaF106G0400016026.01;PaF106G0700026793.01;PaF106G0300012269.01;PaF106G0300012271.01;PaF106G0500018649.01
GO:0008234	cysteine-type peptidase activity	31	0.456611	1.25228	0.165399	0.789086	1172	PaF106G0100001269.01;PaF106G0100001268.01;PaF106G0800030998.01;PaF106G0500018993.01;PaF106G0600022672.01;PaF106G0800031880.01
GO:0020037	heme binding	195	0.309429	1.14265	0.171154	0.793214	2291	PaF106G0400014792.01;PaF106G0100002943.01;PaF106G0300012392.01;PaF106G0300012396.01;PaF106G0100002813.01;PaF106G0300012543.01;PaF106G0200007808.01;PaF106G0500020431.01;PaF106G0100002801.01;PaF106G0100004813.01;PaF106G0200007810.01;PaF106G0200010499.01;PaF106G0700027524.01;PaF106G0800031073.01;PaF106G0200007392.01;PaF106G0100002800.01;PaF106G0100003482.01;PaF106G0100002809.01;PaF106G0200008741.01;…
GO:0008483	transaminase activity	20	-0.523125	-1.3048	0.172131	0.793214	3677	PaF106G0100006634.01;PaF106G0300013065.01;PaF106G0800030718.01;PaF106G0200007269.01;PaF106G0100005787.01;PaF106G0600023698.01;PaF106G0800030717.01;PaF106G0600025168.01;PaF106G0300013018.01
GO:0043169	cation binding	31	-0.450462	-1.23365	0.176471	0.793214	3573	PaF106G0200009220.01;PaF106G0200010379.01;PaF106G0800029406.01;PaF106G0600024594.01;PaF106G0400016026.01;PaF106G0600025303.01;PaF106G0300012269.01;PaF106G0800029291.01;PaF106G0300012271.01;PaF106G0500018649.01
GO:0004672	protein kinase activity	443	-0.27096	-1.0998	0.176991	0.793214	3096	PaF106G0300011927.01;PaF106G0200010127.01;PaF106G0400017587.01;PaF106G0200007687.01;PaF106G0300012507.01;PaF106G0800029462.01;PaF106G0100002652.01;PaF106G0400017723.01;PaF106G0200010044.01;PaF106G0800029856.01;PaF106G0600025641.01;PaF106G0100003738.01;PaF106G0300011252.01;PaF106G0500020467.01;PaF106G0800029863.01;PaF106G0300012322.01;PaF106G0700026759.01;PaF106G0500020834.01;PaF106G0600024278.01;…
GO:0004540	ribonuclease activity	19	-0.523601	-1.29108	0.18125	0.797324	3556	PaF106G0700026912.01;PaF106G0500020688.01;PaF106G0400018443.01;PaF106G0600024953.01;PaF106G0500018662.01;PaF106G0800032136.01
GO:0003899	DNA-directed 5'-3' RNA polymerase activity	38	-0.419142	-1.21138	0.183299	0.797324	4060	PaF106G0200007342.01;PaF106G0600023167.01;PaF106G0100006651.01;PaF106G0300011684.01;PaF106G0600021675.01;PaF106G0300014098.01;PaF106G0700025962.01;PaF106G0700028337.01;PaF106G0200009271.01;PaF106G0700029076.01;PaF106G0600023687.01
GO:0005509	calcium ion binding	178	0.309394	1.12423	0.186408	0.799094	4930	PaF106G0100005093.01;PaF106G0300013170.01;PaF106G0800031962.01;PaF106G0400017172.01;PaF106G0800030402.01;PaF106G0300014027.01;PaF106G0200007192.01;PaF106G0300012431.01;PaF106G0700029172.01;PaF106G0700028038.01;PaF106G0300011928.01;PaF106G0500019267.01;PaF106G0100003995.01;PaF106G0400017045.01;PaF106G0600025575.01;PaF106G0100004845.01;PaF106G0100000775.01;PaF106G0700026191.01;PaF106G0100005160.01;…
GO:0003713	transcription coactivator activity	11	-0.603816	-1.31576	0.189409	0.800361	3657	PaF106G0200009304.01;PaF106G0600025683.01;PaF106G0600025658.01
GO:0016705	oxidoreductase activity, acting on paired donors, with incorporation or reduction of molecular oxygen	118	0.334812	1.15181	0.204545	0.805652	2291	PaF106G0100002943.01;PaF106G0100002813.01;PaF106G0300012543.01;PaF106G0200007808.01;PaF106G0100004813.01;PaF106G0200007810.01;PaF106G0200010499.01;PaF106G0700027524.01;PaF106G0800031073.01;PaF106G0200007392.01;PaF106G0100002800.01;PaF106G0100003482.01;PaF106G0200008741.01;PaF106G0500020276.01;PaF106G0500020427.01;PaF106G0200008742.01;PaF106G0800030200.01;PaF106G0800030433.01;PaF106G0200008744.01;…
GO:0015267	channel activity	19	0.507592	1.25009	0.210728	0.805652	3713	PaF106G0100005230.01;PaF106G0800030686.01;PaF106G0100005974.01;PaF106G0700028984.01;PaF106G0500020130.01;PaF106G0600024355.01;PaF106G0600022577.01;PaF106G0600022378.01;PaF106G0300011433.01
GO:0051213	dioxygenase activity	47	-0.3858	-1.16769	0.211268	0.805652	1517	PaF106G0200008993.01;PaF106G0600021470.01;PaF106G0500019013.01;PaF106G0100006155.01;PaF106G0100000451.01;PaF106G0800031799.01;PaF106G0800031238.01;PaF106G0100000450.01;PaF106G0100005795.01;PaF106G0100000452.01;PaF106G0400015254.01
GO:0030570	pectate lyase activity	19	0.50642	1.2472	0.212644	0.805652	430	PaF106G0100005494.01;PaF106G0100005503.01;PaF106G0100006531.01
GO:0008061	chitin binding	10	-0.599273	-1.2748	0.215164	0.805652	790	PaF106G0100002489.01;PaF106G0700026044.01;PaF106G0700026042.01
GO:0003756	protein disulfide isomerase activity	10	0.604246	1.26519	0.215953	0.805652	1103	PaF106G0400018009.01;PaF106G0100000058.01
GO:0051787	misfolded protein binding	21	-0.490154	-1.23918	0.218367	0.805652	783	PaF106G0700027837.01;PaF106G0700027850.01
GO:0005200	structural constituent of cytoskeleton	18	-0.508754	-1.24312	0.218557	0.805652	4190	PaF106G0600024713.01;PaF106G0300011048.01;PaF106G0200010493.01;PaF106G0800030763.01;PaF106G0300011411.01;PaF106G0700028845.01;PaF106G0500019684.01
GO:0004568	chitinase activity	10	-0.595637	-1.26706	0.219262	0.805652	1121	PaF106G0100002489.01;PaF106G0100002481.01
GO:0016762	xyloglucan:xyloglucosyl transferase activity	22	0.478261	1.20395	0.220307	0.805652	1662	PaF106G0800030157.01;PaF106G0100000801.01;PaF106G0800030158.01;PaF106G0100003078.01;PaF106G0300012535.01
GO:0008536	Ran GTPase binding	15	-0.531202	-1.23217	0.232558	0.805652	4345	PaF106G0200010829.01;PaF106G0100006601.01;PaF106G0200009228.01;PaF106G0100001286.01;PaF106G0600024894.01
GO:0030599	pectinesterase activity	33	0.426224	1.17494	0.234496	0.805652	1908	PaF106G0700026834.01;PaF106G0600025342.01;PaF106G0700026837.01;PaF106G0300014581.01;PaF106G0100001361.01;PaF106G0800029359.01
GO:0045330	aspartyl esterase activity	33	0.426224	1.17494	0.234496	0.805652	1908	PaF106G0700026834.01;PaF106G0600025342.01;PaF106G0700026837.01;PaF106G0300014581.01;PaF106G0100001361.01;PaF106G0800029359.01
GO:0004575	sucrose alpha-glucosidase activity	11	-0.569085	-1.24008	0.240326	0.805652	3840	PaF106G0600024285.01;PaF106G0200010294.01;PaF106G0400018077.01;PaF106G0600024636.01
GO:0004869	cysteine-type endopeptidase inhibitor activity	11	0.567009	1.21832	0.240705	0.805652	464	PaF106G0600021778.01;PaF106G0200007394.01
GO:0097367	carbohydrate derivative binding	18	-0.499821	-1.22129	0.241237	0.805652	4676	PaF106G0800029901.01;PaF106G0200008020.01;PaF106G0600025837.01;PaF106G0800029406.01;PaF106G0100005769.01;PaF106G0800031267.01;PaF106G0600025303.01;PaF106G0800029291.01
GO:0003682	chromatin binding	56	-0.364345	-1.1358	0.243852	0.805652	3262	PaF106G0400015372.01;PaF106G0300013914.01;PaF106G0100005196.01;PaF106G0800029711.01;PaF106G0300012233.01;PaF106G0100001520.01;PaF106G0400018271.01;PaF106G0200009220.01;PaF106G0100004033.01;PaF106G0400015297.01;PaF106G0400014772.01;PaF106G0600024540.01;PaF106G0300012075.01;PaF106G0200010116.01;PaF106G0400015586.01;PaF106G0100005952.01;PaF106G0700026956.01;PaF106G0600021506.01;PaF106G0300013719.01;…
GO:0004222	metalloendopeptidase activity	54	-0.365367	-1.14034	0.246964	0.805652	4629	PaF106G0300011016.01;PaF106G0200008681.01;PaF106G0600025718.01;PaF106G0600024596.01;PaF106G0100005181.01;PaF106G0100003141.01;PaF106G0400016691.01;PaF106G0300011318.01;PaF106G0300011435.01;PaF106G0400016837.01;PaF106G0300013334.01;PaF106G0500019938.01;PaF106G0200006889.01;PaF106G0600021865.01;Prunus_sibirica_newGene_263;PaF106G0300011157.01
GO:0004553	hydrolase activity, hydrolyzing O-glycosyl compounds	114	0.325688	1.11907	0.249531	0.805652	3365	PaF106G0100006049.01;PaF106G0700027870.01;PaF106G0800030157.01;PaF106G0100001412.01;PaF106G0100000801.01;PaF106G0800030158.01;PaF106G0400015976.01;PaF106G0200009803.01;PaF106G0400016282.01;PaF106G0200009129.01;PaF106G0400017362.01;PaF106G0400015877.01;PaF106G0100003078.01;PaF106G0700026218.01;PaF106G0600021581.01;PaF106G0300012535.01;PaF106G0600022982.01;PaF106G0700027898.01;PaF106G0600022773.01;…
GO:0043138	3'-5' DNA helicase activity	14	-0.530202	-1.21686	0.251046	0.805652	2828	PaF106G0200010210.01;PaF106G0700027028.01;PaF106G0500018685.01;PaF106G0100006362.01;PaF106G0400014898.01;PaF106G0700026776.01;PaF106G0600021810.01;PaF106G0700027029.01
GO:0042910	xenobiotic transporter activity	42	-0.381527	-1.13041	0.254032	0.805652	2881	PaF106G0100001069.01;PaF106G0100001528.01;PaF106G0600024915.01;PaF106G0200010536.01;PaF106G0200010535.01;PaF106G0400016048.01;PaF106G0300012453.01;PaF106G0800031532.01;PaF106G0700028354.01;PaF106G0300012442.01;PaF106G0100001072.01;PaF106G0400018149.01;PaF106G0200010540.01
GO:0015333	peptide:proton symporter activity	11	0.552987	1.1882	0.254403	0.805652	1391	PaF106G0600024672.01;PaF106G0100003198.01;PaF106G0100003679.01;PaF106G0600024678.01
GO:0010997	anaphase-promoting complex binding	10	0.585368	1.22566	0.256809	0.805652	2063	PaF106G0800032587.01;PaF106G0700028092.01;PaF106G0700028062.01;PaF106G0800032662.01
GO:0031406	carboxylic acid binding	10	0.583388	1.22151	0.258755	0.805652	5440	PaF106G0200010482.01;PaF106G0300010980.01;PaF106G0300012465.01;PaF106G0400017027.01;PaF106G0500019446.01;PaF106G0600024155.01
GO:0043177	organic acid binding	10	0.583388	1.22151	0.258755	0.805652	5440	PaF106G0200010482.01;PaF106G0300010980.01;PaF106G0300012465.01;PaF106G0400017027.01;PaF106G0500019446.01;PaF106G0600024155.01
GO:1904680	peptide transmembrane transporter activity	12	0.544243	1.19679	0.266795	0.822032	1391	PaF106G0600024672.01;PaF106G0100003198.01;PaF106G0100003679.01;PaF106G0600024678.01
GO:0044877	macromolecular complex binding	14	-0.519069	-1.19131	0.276151	0.841373	991	PaF106G0100005229.01
GO:0031072	heat shock protein binding	33	-0.403213	-1.12653	0.281893	0.841373	783	PaF106G0300013598.01;PaF106G0500021332.01;PaF106G0200009774.01;PaF106G0200009780.01;PaF106G0100001661.01;PaF106G0500021248.01;PaF106G0200009783.01;PaF106G0700027847.01;PaF106G0200008388.01;PaF106G0200010379.01;PaF106G0200009790.01;PaF106G0700027849.01;PaF106G0700027837.01;PaF106G0700027850.01
GO:0030145	manganese ion binding	18	0.48628	1.16761	0.284333	0.841373	3692	PaF106G0500020134.01;PaF106G0500020368.01;PaF106G0100002914.01;PaF106G0500020640.01;PaF106G0100003151.01;PaF106G0400018165.01
GO:0004521	endoribonuclease activity	11	-0.544061	-1.18555	0.285132	0.841373	2554	PaF106G0600024953.01;PaF106G0800032136.01
GO:0004601	peroxidase activity	51	-0.359364	-1.10233	0.290722	0.841373	2514	PaF106G0600024977.01;PaF106G0100000964.01;PaF106G0300011300.01;PaF106G0100005575.01;PaF106G0700029061.01;PaF106G0500021201.01;PaF106G0600021893.01;PaF106G0100001360.01;PaF106G0400018141.01;PaF106G0500020132.01;PaF106G0700028161.01;PaF106G0200010082.01;PaF106G0600024407.01;PaF106G0700027064.01
GO:0008553	hydrogen-exporting ATPase activity, phosphorylative mechanism	11	0.540555	1.16148	0.293542	0.841373	3582	PaF106G0300013527.01;PaF106G0700026049.01;PaF106G0100005346.01;PaF106G0100006375.01
GO:0016773	phosphotransferase activity, alcohol group as acceptor	20	-0.457404	-1.14087	0.29918	0.841373	3732	PaF106G0300012706.01;PaF106G0800030028.01;PaF106G0600024716.01;PaF106G0800029856.01;PaF106G0800029863.01;PaF106G0800031267.01;PaF106G0800030287.01;PaF106G0500020831.01;PaF106G0100000013.01
GO:0016651	oxidoreductase activity, acting on NAD(P)H	12	0.52621	1.15713	0.299424	0.841373	1913	PaF106G0400018009.01;PaF106G0700028154.01;PaF106G0100004938.01
GO:0005384	manganese ion transmembrane transporter activity	10	0.556304	1.16481	0.301556	0.841373	2311	PaF106G0200008806.01;PaF106G0100003968.01;PaF106G0100003967.01
GO:0004722	protein serine/threonine phosphatase activity	63	0.346496	1.08917	0.307263	0.841373	5746	PaF106G0100001486.01;PaF106G0600022183.01;PaF106G0600024932.01;PaF106G0700026694.01;PaF106G0700026499.01;PaF106G0600024563.01;PaF106G0600024228.01;PaF106G0200009994.01;PaF106G0400016075.01;PaF106G0100004871.01;PaF106G0200010701.01;PaF106G0100005100.01;PaF106G0300013467.01;PaF106G0200009628.01;PaF106G0700026938.01;PaF106G0100001301.01;PaF106G0200010689.01;PaF106G0100004645.01;PaF106G0300014555.01;…
GO:0016772	transferase activity, transferring phosphorus-containing groups	20	-0.452833	-1.12948	0.319672	0.841373	2808	PaF106G0800029863.01;PaF106G0800031267.01;PaF106G0800030287.01;PaF106G0500020831.01;PaF106G0100000013.01
GO:0017076	purine nucleotide binding	12	-0.519492	-1.14055	0.320166	0.841373	4312	PaF106G0200008020.01;PaF106G0800029406.01;PaF106G0800031267.01;PaF106G0600025303.01;PaF106G0800029291.01
GO:0030554	adenyl nucleotide binding	12	-0.519492	-1.14055	0.320166	0.841373	4312	PaF106G0200008020.01;PaF106G0800029406.01;PaF106G0800031267.01;PaF106G0600025303.01;PaF106G0800029291.01
GO:0032553	ribonucleotide binding	12	-0.519492	-1.14055	0.320166	0.841373	4312	PaF106G0200008020.01;PaF106G0800029406.01;PaF106G0800031267.01;PaF106G0600025303.01;PaF106G0800029291.01
GO:0032555	purine ribonucleotide binding	12	-0.519492	-1.14055	0.320166	0.841373	4312	PaF106G0200008020.01;PaF106G0800029406.01;PaF106G0800031267.01;PaF106G0600025303.01;PaF106G0800029291.01
GO:0032559	adenyl ribonucleotide binding	12	-0.519492	-1.14055	0.320166	0.841373	4312	PaF106G0200008020.01;PaF106G0800029406.01;PaF106G0800031267.01;PaF106G0600025303.01;PaF106G0800029291.01
GO:0004843	thiol-dependent ubiquitin-specific protease activity	37	0.392218	1.10371	0.321429	0.841373	4094	PaF106G0100001269.01;PaF106G0100001268.01;PaF106G0300012343.01;PaF106G0600024727.01;PaF106G0100001274.01;PaF106G0500019203.01;PaF106G0100004712.01;PaF106G0400016488.01;PaF106G0200007993.01;PaF106G0600022085.01
GO:0016758	transferase activity, transferring hexosyl groups	12	0.515418	1.1334	0.324376	0.841641	3618	PaF106G0300011189.01;PaF106G0600025785.01;PaF106G0200008889.01;PaF106G0100004663.01
GO:0008233	peptidase activity	28	0.411599	1.09938	0.331461	0.852544	1430	PaF106G0100001269.01;PaF106G0100001268.01;PaF106G0800032937.01;PaF106G0800030770.01
GO:0015078	hydrogen ion transmembrane transporter activity	12	-0.513066	-1.12644	0.336798	0.858805	407	PaF106G0800031095.01
GO:0017056	structural constituent of nuclear pore	15	-0.483154	-1.12072	0.342495	0.865866	6800	PaF106G0500020106.01;PaF106G0800030664.01;PaF106G0100003944.01;PaF106G0100002781.01;PaF106G0700026253.01;PaF106G0300014176.01;PaF106G0700028475.01;PaF106G0700027403.01;PaF106G0100005217.01
GO:0017108	5'-flap endonuclease activity	10	-0.536419	-1.14109	0.35041	0.8705	2692	PaF106G0600021884.01;Prunus_sibirica_newGene_2168;PaF106G0800031877.01;PaF106G0400017464.01;PaF106G0500021202.01
GO:0030976	thiamine pyrophosphate binding	10	0.529739	1.10918	0.356031	0.8705	2482	PaF106G0600024842.01;PaF106G0200009736.01;PaF106G0600022018.01;PaF106G0300012806.01
GO:0008237	metallopeptidase activity	17	-0.448353	-1.08315	0.36722	0.8705	7415	PaF106G0100002077.01;PaF106G0200007868.01;PaF106G0300012870.01;PaF106G0300014101.01;PaF106G0100002905.01;PaF106G0800030367.01;PaF106G0100004788.01
GO:0031490	chromatin DNA binding	10	-0.526319	-1.11961	0.368852	0.8705	4430	PaF106G0200010665.01;PaF106G0600021698.01;PaF106G0600021697.01;PaF106G0500018649.01
GO:0030247	polysaccharide binding	40	0.371438	1.06693	0.369732	0.8705	2202	PaF106G0300012867.01;PaF106G0200008156.01;PaF106G0400017172.01;PaF106G0300012431.01;PaF106G0300012869.01;PaF106G0200007405.01;PaF106G0100003741.01;PaF106G0500019224.01;PaF106G0100005160.01;PaF106G0200008150.01;PaF106G0400017223.01;PaF106G0300013222.01
GO:0003700	transcription factor activity, sequence-specific DNA binding	363	0.257682	1.02247	0.371534	0.8705	4389	PaF106G0100004914.01;PaF106G0600025621.01;PaF106G0500021056.01;PaF106G0600024916.01;PaF106G0700029062.01;PaF106G0100004783.01;PaF106G0600024409.01;PaF106G0400017681.01;PaF106G0100001343.01;PaF106G0600024149.01;PaF106G0100005292.01;PaF106G0600023626.01;PaF106G0400017698.01;PaF106G0100000093.01;PaF106G0800029724.01;PaF106G0700027767.01;PaF106G0500019566.01;PaF106G0100006114.01;PaF106G0200010440.01;…
GO:0080043	quercetin 3-O-glucosyltransferase activity	28	-0.399705	-1.06545	0.371795	0.8705	822	PaF106G0300012306.01;PaF106G0100005998.01;PaF106G0600022158.01;PaF106G0600024083.01;PaF106G0600022161.01
GO:0080044	quercetin 7-O-glucosyltransferase activity	28	-0.399705	-1.06545	0.371795	0.8705	822	PaF106G0300012306.01;PaF106G0100005998.01;PaF106G0600022158.01;PaF106G0600024083.01;PaF106G0600022161.01
GO:0003735	structural constituent of ribosome	298	-0.264383	-1.02994	0.377193	0.8705	8100	PaF106G0300011423.01;PaF106G0300014207.01;PaF106G0100006507.01;PaF106G0400015997.01;PaF106G0400017461.01;PaF106G0100000482.01;PaF106G0200010027.01;PaF106G0600025595.01;PaF106G0400015836.01;PaF106G0400014638.01;PaF106G0700027189.01;PaF106G0800029682.01;PaF106G0800031713.01;PaF106G0600023291.01;PaF106G0100002671.01;PaF106G0400017657.01;PaF106G0300012966.01;PaF106G0500019112.01;PaF106G0100000107.01;…
GO:0008184	glycogen phosphorylase activity	13	0.485562	1.09157	0.37931	0.8705	1708	PaF106G0600025876.01;PaF106G0500018645.01;PaF106G0500018648.01;PaF106G0700027880.01
GO:0043621	protein self-association	23	-0.419541	-1.07422	0.382353	0.8705	2188	PaF106G0100004031.01;PaF106G0500018662.01;PaF106G0400018159.01;PaF106G0100000013.01
GO:0051015	actin filament binding	28	0.392519	1.04842	0.383895	0.8705	5623	PaF106G0500021205.01;PaF106G0100004118.01;PaF106G0500019646.01;PaF106G0100000481.01;PaF106G0800032298.01;PaF106G0100000646.01;PaF106G0100000962.01;PaF106G0200008940.01;PaF106G0300012140.01;Prunus_sibirica_newGene_186;PaF106G0400015549.01;PaF106G0100000560.01;PaF106G0800030837.01;PaF106G0600023885.01
GO:0016157	sucrose synthase activity	10	0.519319	1.08736	0.385214	0.8705	3056	PaF106G0800031731.01;PaF106G0800032891.01;PaF106G0100005596.01;PaF106G0100001858.01
GO:0005544	calcium-dependent phospholipid binding	14	0.464867	1.06828	0.389313	0.8705	1291	PaF106G0800031962.01;PaF106G0200007192.01;PaF106G0700029172.01;PaF106G0100003995.01
GO:0005102	receptor binding	19	-0.42639	-1.05138	0.389583	0.8705	449	PaF106G0500018649.01;PaF106G0300013611.01;PaF106G0100000013.01
GO:0036094	small molecule binding	32	0.384844	1.05853	0.395833	0.8705	2287	PaF106G0800030462.01;PaF106G0200010482.01;PaF106G0300010980.01;PaF106G0100001867.01;PaF106G0100001383.01
GO:0050660	flavin adenine dinucleotide binding	56	0.342728	1.03973	0.398833	0.8705	1115	PaF106G0800029503.01;PaF106G0100000523.01;PaF106G0100001087.01;PaF106G0800030444.01;PaF106G0600024138.01;PaF106G0100005269.01
GO:0016538	cyclin-dependent protein serine/threonine kinase regulator activity	22	0.41573	1.04653	0.402299	0.8705	20	PaF106G0800030463.01
GO:0005385	zinc ion transmembrane transporter activity	11	-0.492859	-1.07398	0.403259	0.8705	915	PaF106G0300012360.01;PaF106G0300012363.01;PaF106G0400016906.01
GO:0004177	aminopeptidase activity	12	-0.486885	-1.06896	0.405405	0.8705	6813	PaF106G0800030707.01;PaF106G0100005108.01;PaF106G0200007868.01;PaF106G0300012870.01;PaF106G0300014101.01;PaF106G0600025242.01;PaF106G0100004788.01
GO:0003714	transcription corepressor activity	19	0.428279	1.05476	0.40613	0.8705	312	PaF106G0500019181.01
GO:0045735	nutrient reservoir activity	13	-0.465619	-1.04355	0.416667	0.885743	475	PaF106G0600022513.01
GO:1901265	nucleoside phosphate binding	17	0.44102	1.04619	0.419231	0.885743	27	PaF106G0800030462.01
GO:0015095	magnesium ion transmembrane transporter activity	11	0.492597	1.05844	0.428571	0.890519	5157	PaF106G0400015104.01;PaF106G0100000364.01;PaF106G0800030662.01;PaF106G0400014688.01;PaF106G0100004802.01;PaF106G0100001887.01
GO:0003951	NAD+ kinase activity	14	0.449356	1.03263	0.429389	0.890519	4635	PaF106G0300011881.01;PaF106G0400015186.01;PaF106G0400018118.01;PaF106G0400015921.01;PaF106G0400014695.01;PaF106G0400016397.01;PaF106G0100006744.01
GO:0004252	serine-type endopeptidase activity	89	0.306423	1.01427	0.438433	0.890519	2907	PaF106G0100004308.01;PaF106G0100005060.01;PaF106G0100004306.01;PaF106G0500020082.01;PaF106G0600021400.01;PaF106G0200007203.01;PaF106G0500020945.01;PaF106G0600021739.01;PaF106G0500019598.01;PaF106G0600025765.01;PaF106G0100004142.01;PaF106G0600022171.01;PaF106G0200010455.01;PaF106G0700027545.01;PaF106G0700027769.01;PaF106G0500019487.01
GO:0019843	rRNA binding	29	-0.3778	-1.01322	0.439746	0.890519	6375	PaF106G0200010790.01;PaF106G0100006259.01;PaF106G0700027734.01;PaF106G0100000947.01;PaF106G0400016773.01;PaF106G0600024352.01;PaF106G0300011413.01;PaF106G0500019957.01;PaF106G0500020110.01;PaF106G0700028022.01;PaF106G0600021952.01;PaF106G0100001322.01;PaF106G0100006516.01;PaF106G0100006401.01;PaF106G0300013691.01
GO:0004364	glutathione transferase activity	21	-0.404333	-1.02221	0.440816	0.890519	3322	PaF106G0200008132.01;PaF106G0400016496.01;PaF106G0100000658.01;PaF106G0400016502.01
GO:0000977	RNA polymerase II regulatory region sequence-specific DNA binding	40	0.351843	1.01064	0.450192	0.890519	3405	PaF106G0200008233.01;PaF106G0300011662.01;PaF106G0500020561.01;PaF106G0100006114.01;PaF106G0200008781.01;PaF106G0100003460.01;PaF106G0300010991.01;PaF106G0100005891.01;PaF106G0100006319.01;PaF106G0600024523.01;PaF106G0200008783.01;PaF106G0200010418.01;PaF106G0500019537.01;PaF106G0700027165.01;PaF106G0200007066.01
GO:0016760	cellulose synthase (UDP-forming) activity	24	0.386561	0.988842	0.451737	0.890519	3191	PaF106G0100000423.01;Prunus_sibirica_newGene_701;PaF106G0500019952.01;PaF106G0500019950.01;PaF106G0500018793.01;PaF106G0800030360.01;PaF106G0400015910.01;PaF106G0400017550.01
GO:0018024	histone-lysine N-methyltransferase activity	15	0.437863	1.02064	0.451796	0.890519	110	PaF106G0700026969.01
GO:0033612	receptor serine/threonine kinase binding	10	-0.479242	-1.01946	0.454918	0.890519	405	PaF106G0100004621.01;PaF106G0100002652.01;PaF106G0300013611.01;PaF106G0100000013.01
GO:0031625	ubiquitin protein ligase binding	51	0.334402	0.998681	0.45648	0.890519	4410	PaF106G0300011024.01;PaF106G0100005658.01;PaF106G0400016551.01;PaF106G0400016557.01;PaF106G0400015888.01;PaF106G0600021737.01;PaF106G0100005656.01;PaF106G0100001153.01;PaF106G0300012465.01;PaF106G0400017027.01;PaF106G0500019219.01;PaF106G0600022565.01;PaF106G0100003270.01;PaF106G0400018188.01;PaF106G0100003259.01;PaF106G0100003419.01;PaF106G0400015893.01;PaF106G0400016554.01
GO:0000978	RNA polymerase II core promoter proximal region sequence-specific DNA binding	30	0.364147	0.995873	0.45951	0.890519	4264	Prunus_sibirica_newGene_343;Prunus_sibirica_newGene_2245;PaF106G0600025440.01;PaF106G0500020520.01;PaF106G0100003966.01;PaF106G0200010463.01;PaF106G0400016717.01;PaF106G0500019544.01;PaF106G0500019735.01;PaF106G0600021397.01;PaF106G0400017258.01
GO:0008757	S-adenosylmethionine-dependent methyltransferase activity	23	-0.394239	-1.00943	0.460084	0.890519	1071	PaF106G0800030531.01;PaF106G0500021185.01;PaF106G0800030528.01;PaF106G0300013106.01;PaF106G0300013243.01
GO:0038023	signaling receptor activity	35	0.359696	1.00386	0.46063	0.890519	1305	PaF106G0200008171.01;PaF106G0400017686.01;PaF106G0400016192.01;PaF106G0400016187.01
GO:0017016	Ras GTPase binding	11	-0.462371	-1.00755	0.468432	0.893917	6384	PaF106G0100004375.01;PaF106G0400015793.01;PaF106G0400016045.01;PaF106G0200010379.01;PaF106G0100002441.01;PaF106G0100005229.01
GO:0031267	small GTPase binding	11	-0.462371	-1.00755	0.468432	0.893917	6384	PaF106G0100004375.01;PaF106G0400015793.01;PaF106G0400016045.01;PaF106G0200010379.01;PaF106G0100002441.01;PaF106G0100005229.01
GO:0016709	oxidoreductase activity, acting on paired donors, with incorporation or reduction of molecular oxygen, NAD(P)H as one donor, and incorporation of one atom of oxygen	41	0.344364	0.986837	0.485437	0.915108	1356	PaF106G0300012392.01;PaF106G0300012396.01;PaF106G0500020431.01;PaF106G0100002801.01;PaF106G0100002809.01;PaF106G0700027595.01;PaF106G0100006700.01;PaF106G0500018596.01
GO:0005351	sugar:proton symporter activity	18	-0.398558	-0.973858	0.486598	0.915108	82	PaF106G0100001674.01
GO:0004675	transmembrane receptor protein serine/threonine kinase activity	51	-0.318481	-0.976925	0.492784	0.915108	3514	PaF106G0500019545.01;PaF106G0300011715.01;PaF106G0800032397.01;PaF106G0500019421.01;PaF106G0800031420.01;PaF106G0100000991.01;PaF106G0800031419.01;PaF106G0400015359.01;PaF106G0700028605.01;PaF106G0100005263.01;PaF106G0500018861.01
GO:0016818	hydrolase activity, acting on acid anhydrides, in phosphorus-containing anhydrides	18	-0.392258	-0.958465	0.494845	0.915108	510	PaF106G0700027029.01
GO:0016835	carbon-oxygen lyase activity	11	-0.449143	-0.97872	0.496945	0.915108	1024	PaF106G0600024640.01
GO:0004707	MAP kinase activity	16	0.417571	0.986048	0.498099	0.915108	3581	PaF106G0500021212.01;PaF106G0600022458.01;PaF106G0100001732.01;PaF106G0600022439.01
GO:0004630	phospholipase D activity	10	0.471952	0.988186	0.501946	0.915352	6298	PaF106G0300014027.01;PaF106G0500019546.01;PaF106G0100006652.01;PaF106G0100005570.01;PaF106G0300013652.01;PaF106G0200008790.01;PaF106G0100001488.01;PaF106G0700027049.01
GO:0003678	DNA helicase activity	34	-0.348992	-0.978675	0.509317	0.915352	3175	PaF106G0100003857.01;PaF106G0300012555.01;PaF106G0400017118.01;PaF106G0400017116.01;PaF106G0300013814.01;PaF106G0500020851.01;PaF106G0600024458.01;PaF106G0700026115.01;PaF106G0500018561.01;PaF106G0400017398.01;PaF106G0300013794.01;PaF106G0800029282.01;PaF106G0800031521.01;PaF106G0700027029.01
GO:0030246	carbohydrate binding	125	-0.275955	-0.972541	0.512712	0.915352	1647	PaF106G0500020912.01;PaF106G0400016153.01;PaF106G0100000040.01;PaF106G0400015898.01;PaF106G0200009146.01;PaF106G0500018693.01;PaF106G0400017008.01;PaF106G0400015359.01;PaF106G0400016118.01;PaF106G0700026044.01;PaF106G0400016137.01;PaF106G0600023316.01;PaF106G0600025336.01;PaF106G0600025140.01;PaF106G0400016135.01;PaF106G0400016558.01
GO:0016671	oxidoreductase activity, acting on a sulfur group of donors, disulfide as acceptor	18	0.40767	0.978859	0.518375	0.915352	3228	PaF106G0400018009.01;PaF106G0700028154.01;PaF106G0400018230.01;PaF106G0700029260.01;PaF106G0400015682.01
GO:0005216	ion channel activity	32	-0.349237	-0.964012	0.518987	0.915352	973	PaF106G0700026629.01;PaF106G0800031419.01;PaF106G0700026626.01;PaF106G0800031421.01
GO:0016746	transferase activity, transferring acyl groups	18	0.405885	0.974573	0.522244	0.915352	2622	Prunus_sibirica_newGene_167;PaF106G0200009839.01;PaF106G0400015300.01;PaF106G0100004530.01
GO:0015079	potassium ion transmembrane transporter activity	17	-0.392223	-0.947547	0.522822	0.915352	950	PaF106G0800031976.01;PaF106G0500021260.01;PaF106G0800029463.01
GO:0016298	lipase activity	13	0.416764	0.936905	0.522989	0.915352	1066	PaF106G0100003928.01;PaF106G0400017668.01;PaF106G0200009686.01
GO:0017022	myosin binding	11	-0.425698	-0.927632	0.537678	0.935527	2307	PaF106G0800031267.01;PaF106G0500020636.01;PaF106G0100002765.01
GO:0004523	RNA-DNA hybrid ribonuclease activity	22	-0.368067	-0.932135	0.55	0.949796	1703	PaF106G0600023354.01;Prunus_sibirica_newGene_1354;Prunus_sibirica_newGene_415;PaF106G0600022492.01;PaF106G0200009237.01;Prunus_sibirica_newGene_175;PaF106G0200008308.01;PaF106G0600022324.01
GO:0016836	hydro-lyase activity	14	-0.412895	-0.94763	0.552301	0.949796	1773	PaF106G0500018541.01;PaF106G0600024640.01
GO:0043022	ribosome binding	21	-0.35988	-0.909831	0.559184	0.952397	6819	PaF106G0400015594.01;PaF106G0700025940.01;PaF106G0700026817.01;PaF106G0100003359.01;PaF106G0600025736.01;PaF106G0400016616.01;PaF106G0500021199.01;PaF106G0400016617.01;PaF106G0800030600.01;PaF106G0400017250.01;PaF106G0100002500.01;PaF106G0400017451.01;PaF106G0400016018.01
GO:0043167	ion binding	66	-0.291615	-0.940329	0.560254	0.952397	4545	PaF106G0600024910.01;PaF106G0200009220.01;PaF106G0200008020.01;PaF106G0200010379.01;PaF106G0800029406.01;PaF106G0600024594.01;PaF106G0400016026.01;PaF106G0600025385.01;PaF106G0800031267.01;PaF106G0300012679.01;PaF106G0500020162.01;PaF106G0600025303.01;PaF106G0300012269.01;PaF106G0800029291.01;PaF106G0300012271.01;PaF106G0500018649.01
GO:0047134	protein-disulfide reductase activity	12	0.420946	0.925659	0.564299	0.953793	2500	PaF106G0400018009.01;PaF106G0700028154.01;PaF106G0200006872.01
GO:0008097	5S rRNA binding	11	-0.411414	-0.896506	0.570265	0.955307	5355	PaF106G0100000482.01;PaF106G0700025953.01;PaF106G0200008268.01;PaF106G0700027486.01;PaF106G0600025497.01;PaF106G0200008613.01
GO:0004525	ribonuclease III activity	21	-0.357481	-0.903765	0.57551	0.955307	3032	PaF106G0500020575.01;PaF106G0600025847.01;PaF106G0700028560.01;PaF106G0400015644.01;PaF106G0600024953.01;PaF106G0800030143.01;PaF106G0400015635.01;PaF106G0300012067.01
GO:0051539	4 iron, 4 sulfur cluster binding	41	-0.31988	-0.941631	0.581109	0.955307	4131	PaF106G0100006672.01;PaF106G0100004154.01;PaF106G0100000593.01;PaF106G0100002218.01;Prunus_sibirica_newGene_521;PaF106G0600022812.01;Prunus_sibirica_newGene_1393;Prunus_sibirica_newGene_2168;PaF106G0800031877.01;PaF106G0200009766.01
GO:0004176	ATP-dependent peptidase activity	14	-0.401142	-0.920656	0.58159	0.955307	4589	PaF106G0100004192.01;PaF106G0500019443.01;PaF106G0800030878.01;PaF106G0300013901.01;PaF106G0600025718.01;PaF106G0600025290.01;PaF106G0300013334.01;PaF106G0500019938.01
GO:0008134	transcription factor binding	36	0.325598	0.9171	0.582846	0.955307	4893	Prunus_sibirica_newGene_167;PaF106G0200008233.01;PaF106G0300011662.01;PaF106G0500020561.01;PaF106G0200008781.01;PaF106G0100005891.01;PaF106G0100006319.01;PaF106G0200010418.01;PaF106G0100001870.01;PaF106G0400015823.01;PaF106G0600021397.01;PaF106G0500020650.01;PaF106G0700027960.01;PaF106G0100002725.01
GO:0004565	beta-galactosidase activity	14	0.388916	0.89374	0.585878	0.955307	2852	PaF106G0700026639.01;PaF106G0800030624.01;PaF106G0200007225.01
GO:0008094	DNA-dependent ATPase activity	23	-0.354698	-0.90819	0.592437	0.955307	445	PaF106G0800029288.01;PaF106G0300013963.01;PaF106G0500020851.01;PaF106G0600022446.01;PaF106G0700027029.01
GO:0004197	cysteine-type endopeptidase activity	23	0.358097	0.912237	0.593156	0.955307	1741	PaF106G0400017640.01;PaF106G0700027434.01;PaF106G0300012958.01;PaF106G0500020380.01
GO:0015299	solute:proton antiporter activity	20	-0.354327	-0.883776	0.594262	0.955307	1890	PaF106G0300012453.01;PaF106G0600021920.01;PaF106G0300012442.01;PaF106G0200007136.01
GO:0016887	ATPase activity	190	0.257309	0.944548	0.609284	0.963484	3431	PaF106G0200010593.01;PaF106G0400015437.01;PaF106G0100001225.01;PaF106G0100001230.01;PaF106G0300013919.01;PaF106G0800029996.01;Prunus_sibirica_newGene_1780;PaF106G0400015974.01;PaF106G0800029993.01;PaF106G0800029394.01;PaF106G0200007742.01;PaF106G0800032614.01;PaF106G0800029415.01;PaF106G0700028053.01;PaF106G0100001226.01;PaF106G0800029999.01;PaF106G0700027839.01;Prunus_sibirica_newGene_938;PaF106…
GO:0016597	amino acid binding	12	0.396491	0.871881	0.614203	0.963484	5896	PaF106G0300010980.01;PaF106G0100005850.01;PaF106G0500019446.01;PaF106G0600024155.01;PaF106G0100005851.01
GO:0003993	acid phosphatase activity	31	-0.330419	-0.904897	0.617647	0.963484	2072	PaF106G0800031510.01;PaF106G0600025068.01;PaF106G0700027783.01;PaF106G0100000720.01;PaF106G0800029962.01;PaF106G0100000099.01;PaF106G0800031512.01
GO:0003774	motor activity	12	-0.394988	-0.867199	0.619543	0.963484	115	PaF106G0200006790.01
GO:0000049	tRNA binding	26	-0.340376	-0.896783	0.62039	0.963484	5572	PaF106G0100002500.01;PaF106G0300011657.01;PaF106G0700028425.01;PaF106G0800032716.01;PaF106G0200010128.01;PaF106G0200008483.01;PaF106G0800030490.01;PaF106G0600022569.01;PaF106G0400017693.01;PaF106G0200008474.01
GO:0000155	phosphorelay sensor kinase activity	13	0.385892	0.867503	0.624521	0.963484	5710	PaF106G0700027095.01;PaF106G0100002734.01;PaF106G0300012181.01;PaF106G0100001366.01;PaF106G0800029345.01;PaF106G0100000426.01
GO:0004402	histone acetyltransferase activity	14	0.376171	0.864451	0.627863	0.963484	3854	Prunus_sibirica_newGene_167;PaF106G0600024199.01;PaF106G0700025943.01;PaF106G0100000869.01;PaF106G0500020382.01;PaF106G0200010710.01
GO:0016616	oxidoreductase activity, acting on the CH-OH group of donors, NAD or NADP as acceptor	26	-0.334976	-0.882555	0.631236	0.963484	5267	PaF106G0600021954.01;PaF106G0200008767.01;PaF106G0400018003.01;PaF106G0300012264.01;PaF106G0800030611.01;PaF106G0200008768.01;PaF106G0100004720.01;PaF106G0800030960.01;PaF106G0200007034.01;PaF106G0600023385.01;PaF106G0100006745.01;PaF106G0800030702.01;PaF106G0100006429.01;PaF106G0200008699.01;PaF106G0600024041.01
GO:0003684	damaged DNA binding	22	-0.345837	-0.875837	0.63125	0.963484	7833	PaF106G0800030942.01;PaF106G0800030858.01;PaF106G0700026718.01;PaF106G0800030854.01;PaF106G0600024236.01;PaF106G0800029319.01;PaF106G0600022056.01;PaF106G0100003684.01;PaF106G0100002086.01;PaF106G0100003680.01;PaF106G0800029288.01;PaF106G0300013586.01;PaF106G0300013963.01
GO:0005525	GTP binding	212	-0.247642	-0.935444	0.643443	0.963484	4334	PaF106G0600022519.01;PaF106G0100006249.01;PaF106G0800031892.01;PaF106G0100004388.01;PaF106G0500019922.01;PaF106G0600024713.01;PaF106G0500019035.01;PaF106G0800029659.01;PaF106G0400015576.01;PaF106G0300014050.01;PaF106G0400017533.01;PaF106G0100001620.01;PaF106G0700027808.01;PaF106G0800030650.01;PaF106G0500019924.01;PaF106G0700028536.01;PaF106G0100001688.01;PaF106G0200010493.01;PaF106G0100006466.01;…
GO:0001067	regulatory region nucleic acid binding	13	-0.379548	-0.850646	0.64375	0.963484	5065	PaF106G0200009220.01;Prunus_sibirica_newGene_1840;PaF106G0500018649.01
GO:0044212	transcription regulatory region DNA binding	13	-0.379548	-0.850646	0.64375	0.963484	5065	PaF106G0200009220.01;Prunus_sibirica_newGene_1840;PaF106G0500018649.01
GO:0051020	GTPase binding	14	-0.369399	-0.847802	0.654812	0.963484	4467	PaF106G0400015793.01;PaF106G0400016045.01;PaF106G0200010379.01;PaF106G0100002441.01;PaF106G0100005229.01
GO:0051082	unfolded protein binding	86	-0.269696	-0.90269	0.658065	0.963484	5976	PaF106G0600023253.01;PaF106G0100000200.01;PaF106G0500021253.01;PaF106G0300013598.01;PaF106G0300012184.01;PaF106G0200009774.01;PaF106G0300012782.01;PaF106G0200010666.01;PaF106G0100004208.01;PaF106G0200009780.01;PaF106G0400018082.01;PaF106G0400015592.01;PaF106G0100000901.01;PaF106G0200009783.01;PaF106G0100004287.01;PaF106G0600025843.01;PaF106G0100003512.01;PaF106G0300013310.01;PaF106G0700027847.01;…
GO:0015631	tubulin binding	17	0.353135	0.837707	0.659615	0.963484	234	PaF106G0200010593.01
GO:0015297	antiporter activity	62	-0.277038	-0.886813	0.659619	0.963484	2881	PaF106G0200010541.01;PaF106G0400018173.01;PaF106G0200010537.01;PaF106G0400016063.01;PaF106G0100001069.01;PaF106G0100001528.01;PaF106G0600024915.01;PaF106G0200010536.01;PaF106G0200010535.01;PaF106G0400016048.01;PaF106G0800031532.01;PaF106G0700028354.01;PaF106G0100001072.01;PaF106G0400018149.01;PaF106G0200010540.01
GO:0016168	chlorophyll binding	16	-0.362054	-0.855839	0.663866	0.963484	7065	PaF106G0800030884.01;PaF106G0600023109.01;PaF106G0300012505.01;PaF106G0400015937.01;PaF106G0200009956.01;PaF106G0500020784.01;PaF106G0500018484.01;PaF106G0400017422.01
GO:0009931	calcium-dependent protein serine/threonine kinase activity	15	0.351455	0.819224	0.672968	0.963484	4834	PaF106G0100004242.01;PaF106G0500019560.01;PaF106G0800032060.01;PaF106G0400015043.01;PaF106G0700027120.01
GO:0015035	protein disulfide oxidoreductase activity	56	0.28703	0.870762	0.684825	0.963484	1677	PaF106G0100002222.01;PaF106G0400018009.01;PaF106G0700028154.01;PaF106G0400017868.01;PaF106G0800029482.01;PaF106G0400017850.01;PaF106G0600021999.01;PaF106G0800029483.01;PaF106G0100004815.01;PaF106G0500019945.01
GO:0009055	electron carrier activity	92	-0.259404	-0.878305	0.692641	0.963484	2227	PaF106G0200009285.01;PaF106G0300010973.01;PaF106G0800029479.01;PaF106G0200007804.01;PaF106G0200008510.01;PaF106G0300013477.01;PaF106G0400017848.01;PaF106G0500020059.01;PaF106G0800032723.01;PaF106G0500021035.01;PaF106G0400017829.01
GO:0008144	drug binding	20	-0.324825	-0.810191	0.696721	0.963484	3344	PaF106G0800031267.01;PaF106G0600025303.01;PaF106G0800029291.01
GO:0003680	AT DNA binding	12	-0.369882	-0.812078	0.698545	0.963484	2908	PaF106G0500018941.01;PaF106G0200009845.01;PaF106G0500019445.01;PaF106G0700027708.01;PaF106G0200008718.01;PaF106G0200010366.01
GO:0044389	ubiquitin-like protein ligase binding	24	0.330271	0.844849	0.698842	0.963484	4031	PaF106G0300011024.01;PaF106G0600021737.01;PaF106G0100005656.01;PaF106G0300012465.01;PaF106G0400017027.01;PaF106G0600022565.01;PaF106G0100003259.01
GO:0071949	FAD binding	44	-0.292605	-0.875793	0.703407	0.963484	4271	PaF106G0400017150.01;PaF106G0200009312.01;PaF106G0700025900.01;PaF106G0100002828.01;PaF106G0100006410.01;PaF106G0500019431.01;PaF106G0800030824.01;PaF106G0500019179.01;PaF106G0100004079.01;PaF106G0100005453.01;PaF106G0400017132.01;PaF106G0400017131.01;PaF106G0200007337.01;PaF106G0800032287.01;PaF106G0100002006.01
GO:0010181	FMN binding	27	0.312254	0.831578	0.70872	0.963484	3193	PaF106G0800030242.01;PaF106G0800030239.01;PaF106G0100006332.01;PaF106G0400017991.01;PaF106G0600022071.01;PaF106G0700026735.01
GO:0005545	1-phosphatidylinositol binding	11	0.375713	0.807288	0.710372	0.963484	2259	PaF106G0300012095.01;PaF106G0100000873.01
GO:0005249	voltage-gated potassium channel activity	10	-0.366015	-0.778602	0.721311	0.963484	4348	PaF106G0400017375.01;PaF106G0600022616.01;PaF106G0500021266.01
GO:0005507	copper ion binding	52	0.284133	0.849271	0.732943	0.963484	2665	PaF106G0400016721.01;PaF106G0800030507.01;PaF106G0300013544.01;PaF106G0500019669.01;PaF106G0700029104.01;PaF106G0700027240.01;PaF106G0200010295.01;PaF106G0600021381.01;PaF106G0600021382.01;PaF106G0400018076.01;PaF106G0800030285.01;PaF106G0600021383.01
GO:0016791	phosphatase activity	21	0.319202	0.797719	0.738281	0.963484	4241	PaF106G0300014536.01;PaF106G0200009920.01;PaF106G0300014020.01;PaF106G0400018408.01;PaF106G0400016641.01;PaF106G0800031763.01;PaF106G0600022991.01
GO:0009982	pseudouridine synthase activity	16	-0.335674	-0.793481	0.741597	0.963484	4427	PaF106G0800032299.01;PaF106G0800030956.01;PaF106G0600025597.01;PaF106G0500019920.01;PaF106G0100004218.01;PaF106G0500019077.01;PaF106G0400018170.01;PaF106G0600025294.01
GO:0004857	enzyme inhibitor activity	30	-0.302348	-0.817534	0.7431	0.963484	1384	PaF106G0200010333.01;PaF106G0700026835.01;PaF106G0400018050.01;PaF106G0500019067.01
GO:0004322	ferroxidase activity	18	-0.325924	-0.79638	0.74433	0.963484	2698	PaF106G0800031428.01;PaF106G0800032256.01;PaF106G0800032257.01
GO:0016829	lyase activity	46	0.281766	0.81624	0.755467	0.963484	1509	PaF106G0600022481.01;PaF106G0300014492.01;PaF106G0100001087.01;PaF106G0300014486.01;PaF106G0300013808.01;PaF106G0200008241.01
GO:0003743	translation initiation factor activity	70	0.264842	0.841828	0.75985	0.963484	7553	PaF106G0100000121.01;PaF106G0200008098.01;PaF106G0400015711.01;PaF106G0700028070.01;PaF106G0300011997.01;PaF106G0700028094.01;PaF106G0300011620.01;PaF106G0400018000.01;PaF106G0200008325.01;PaF106G0100006134.01;PaF106G0100002990.01;PaF106G0800030466.01;PaF106G0200009935.01;PaF106G0500021046.01;PaF106G0100006460.01;PaF106G0500019832.01;PaF106G0700026684.01;PaF106G0700025975.01;PaF106G0300011728.01;…
GO:0035091	phosphatidylinositol binding	23	0.313918	0.799694	0.764259	0.963484	7259	PaF106G0300013816.01;PaF106G0700026827.01;PaF106G0800032521.01;PaF106G0700027242.01;PaF106G0200008034.01;PaF106G0400016868.01;PaF106G0100005589.01;PaF106G0400017502.01;PaF106G0600021928.01;PaF106G0200010043.01;PaF106G0600022753.01;PaF106G0300013591.01;PaF106G0400016299.01
GO:0008271	secondary active sulfate transmembrane transporter activity	11	0.354263	0.7612	0.765166	0.963484	4588	PaF106G0100000259.01;PaF106G0100005894.01;PaF106G0100003867.01;PaF106G0200009698.01;PaF106G0100005896.01;PaF106G0300013782.01;PaF106G0700027414.01
GO:0008080	N-acetyltransferase activity	21	0.309741	0.774074	0.775391	0.963484	3586	Prunus_sibirica_newGene_167;PaF106G0100000222.01;PaF106G0600024523.01;PaF106G0100001156.01
GO:0017111	nucleoside-triphosphatase activity	11	0.343903	0.73894	0.786693	0.963484	234	PaF106G0200010593.01
GO:0008374	O-acyltransferase activity	13	-0.336196	-0.753483	0.7875	0.963484	2251	PaF106G0600022026.01;PaF106G0300013190.01
GO:0016759	cellulose synthase activity	13	0.326528	0.734049	0.789272	0.963484	233	PaF106G0100000423.01
GO:0016831	carboxy-lyase activity	10	0.35098	0.734892	0.789883	0.963484	1626	PaF106G0600024842.01;PaF106G0600023983.01;PaF106G0600022018.01
GO:0050661	NADP binding	39	0.271773	0.777693	0.795761	0.963484	1115	PaF106G0800029503.01;PaF106G0800030444.01;PaF106G0100005269.01
GO:0016779	nucleotidyltransferase activity	20	0.305259	0.753079	0.797665	0.963484	3732	PaF106G0500019777.01;PaF106G0400014686.01;Prunus_sibirica_newGene_1004;PaF106G0600023175.01
GO:0030276	clathrin binding	11	0.339438	0.729346	0.802348	0.963484	7046	PaF106G0100004516.01;PaF106G0700027230.01;PaF106G0100002155.01;PaF106G0100005689.01;PaF106G0100004883.01;PaF106G0300013884.01
GO:0008236	serine-type peptidase activity	18	-0.310836	-0.759514	0.804124	0.963484	3530	PaF106G0100005149.01;PaF106G0600024790.01;PaF106G0100005148.01
GO:0042578	phosphoric ester hydrolase activity	10	-0.325687	-0.692813	0.807377	0.963484	1397	PaF106G0400018432.01;PaF106G0400015349.01;PaF106G0600024827.01;Prunus_sibirica_newGene_1959
GO:0051087	chaperone binding	28	-0.283053	-0.7545	0.807692	0.963484	5996	PaF106G0400017288.01;PaF106G0500019584.01;PaF106G0500021332.01;PaF106G0300012782.01;PaF106G0100004098.01;PaF106G0400015592.01;PaF106G0100003868.01;PaF106G0400018318.01;PaF106G0100005846.01;PaF106G0100000009.01;PaF106G0700026793.01;PaF106G0200009133.01
GO:0003779	actin binding	31	-0.279404	-0.765186	0.808824	0.963484	115	PaF106G0800029498.01;PaF106G0400014936.01;PaF106G0100000253.01;PaF106G0700028849.01;PaF106G0100005178.01;PaF106G0200010145.01;PaF106G0500021333.01;PaF106G0200006790.01
GO:0000981	RNA polymerase II transcription factor activity, sequence-specific DNA binding	33	0.277972	0.766262	0.815891	0.963484	3969	PaF106G0200008233.01;PaF106G0300011662.01;PaF106G0200008781.01;PaF106G0100005891.01;PaF106G0100006319.01;PaF106G0500020520.01;PaF106G0200010418.01;PaF106G0100003314.01;PaF106G0500019544.01;PaF106G0500019735.01
GO:0016462	pyrophosphatase activity	13	0.317989	0.714853	0.816092	0.963484	234	PaF106G0200010593.01
GO:0004190	aspartic-type endopeptidase activity	45	-0.269425	-0.807948	0.817444	0.963484	373	PaF106G0600025537.01;PaF106G0200007260.01;PaF106G0600025634.01;PaF106G0300012744.01;PaF106G0300012745.01
GO:0008422	beta-glucosidase activity	14	-0.309111	-0.709438	0.820084	0.963484	3648	PaF106G0600022089.01;PaF106G0600023212.01;PaF106G0100003396.01;PaF106G0600021580.01
GO:0008810	cellulase activity	12	-0.317868	-0.69788	0.827443	0.963484	2555	PaF106G0500019757.01;PaF106G0500020052.01;PaF106G0100003916.01
GO:0000175	3'-5'-exoribonuclease activity	17	0.298181	0.707345	0.828846	0.963484	4114	Prunus_sibirica_newGene_1207;PaF106G0300012207.01;PaF106G0500021070.01;PaF106G0200009386.01;PaF106G0600024588.01
GO:0005347	ATP transmembrane transporter activity	38	-0.264453	-0.764308	0.832994	0.963484	46	PaF106G0200007902.01
GO:0016853	isomerase activity	18	0.285025	0.684374	0.839458	0.963484	1103	PaF106G0400018009.01;PaF106G0100000058.01
GO:0098772	molecular function regulator	30	-0.269637	-0.729086	0.85138	0.963484	4730	PaF106G0600024910.01;PaF106G0400016045.01;PaF106G0800032140.01;PaF106G0100002441.01;PaF106G0400014772.01;PaF106G0300012679.01;PaF106G0300012225.01
GO:0016817	hydrolase activity, acting on acid anhydrides	17	0.289127	0.685866	0.851923	0.963484	234	PaF106G0200010593.01
GO:0030983	mismatched DNA binding	12	-0.301295	-0.661495	0.858628	0.963484	5104	PaF106G0200010476.01;PaF106G0100000600.01;PaF106G0800029288.01;PaF106G0800029424.01;PaF106G0700026399.01
GO:0008320	protein transmembrane transporter activity	14	0.298738	0.686508	0.860687	0.963484	2892	PaF106G0300011000.01;PaF106G0400015519.01
GO:0017091	AU-rich element binding	11	-0.300144	-0.654037	0.869654	0.963484	3242	PaF106G0400018110.01;PaF106G0400018443.01;PaF106G0200008513.01
GO:2001070	starch binding	11	-0.294984	-0.642794	0.881874	0.963484	2316	PaF106G0400018135.01
GO:0004527	exonuclease activity	16	0.28466	0.672193	0.882129	0.963484	1989	Prunus_sibirica_newGene_1207;Prunus_sibirica_newGene_1189;PaF106G0300012207.01
GO:0030170	pyridoxal phosphate binding	76	-0.234843	-0.774464	0.890591	0.963484	2924	PaF106G0300013065.01;PaF106G0300014103.01;PaF106G0800030718.01;PaF106G0500019751.01;PaF106G0100005787.01;PaF106G0600023698.01;PaF106G0600023886.01;PaF106G0500018829.01;PaF106G0800030717.01;PaF106G0600025563.01;PaF106G0500019661.01;PaF106G0100000173.01;PaF106G0100006456.01;PaF106G0600022783.01;PaF106G0300013018.01;PaF106G0400017290.01
GO:0003924	GTPase activity	150	-0.223087	-0.801045	0.894624	0.963484	4334	PaF106G0600022519.01;PaF106G0100006249.01;PaF106G0500019922.01;PaF106G0600024713.01;PaF106G0400015576.01;PaF106G0300014050.01;PaF106G0400017533.01;PaF106G0100001620.01;PaF106G0700027808.01;PaF106G0500019924.01;PaF106G0100001688.01;PaF106G0200010493.01;PaF106G0100006466.01;PaF106G0500021038.01;PaF106G0100000142.01;PaF106G0100006323.01;PaF106G0300011142.01;PaF106G0200007272.01;PaF106G0800030763.01;…
GO:0016765	transferase activity, transferring alkyl or aryl (other than methyl) groups	14	-0.269733	-0.61906	0.89749	0.963484	3360	PaF106G0200009627.01;PaF106G0100005672.01;PaF106G0100004090.01;PaF106G0500019671.01;PaF106G0100004092.01;PaF106G0800031396.01;PaF106G0100003185.01;PaF106G0100000976.01;PaF106G0400016263.01
GO:0016614	oxidoreductase activity, acting on CH-OH group of donors	11	0.299558	0.643657	0.898239	0.963484	403	PaF106G0100001087.01
GO:0051117	ATPase binding	11	-0.28202	-0.614544	0.900204	0.963484	4730	PaF106G0800030878.01;PaF106G0400018273.01;PaF106G0300012078.01;PaF106G0300011084.01;PaF106G0100004379.01
GO:0050897	cobalt ion binding	12	0.28765	0.63254	0.907869	0.963484	3886	PaF106G0100005850.01;PaF106G0300013925.01;PaF106G0800029453.01
GO:0016874	ligase activity	66	-0.22836	-0.736362	0.911205	0.963484	1403	PaF106G0200010477.01;PaF106G0200009082.01;PaF106G0600024242.01;PaF106G0800029571.01;PaF106G0300013389.01;PaF106G0700027580.01;PaF106G0600024241.01
GO:0031624	ubiquitin conjugating enzyme binding	11	0.275731	0.592458	0.917808	0.963484	14064	PaF106G0100001870.01;PaF106G0400015314.01;Prunus_sibirica_newGene_322;PaF106G0400016730.01;PaF106G0300011439.01;PaF106G0700026829.01;PaF106G0500018873.01;PaF106G0300013391.01;PaF106G0600025855.01;PaF106G0100002292.01;PaF106G0200006947.01
GO:0052689	carboxylic ester hydrolase activity	12	-0.26341	-0.578317	0.929314	0.963484	3719	PaF106G0400015373.01;PaF106G0800031496.01
GO:0005543	phospholipid binding	24	-0.247899	-0.643962	0.931818	0.963484	2405	PaF106G0600025385.01;PaF106G0300012679.01;PaF106G0500020162.01
GO:0008408	3'-5' exonuclease activity	17	-0.256921	-0.62068	0.935685	0.963484	3450	Prunus_sibirica_newGene_392;PaF106G0400018443.01;Prunus_sibirica_newGene_1796
GO:0008289	lipid binding	82	0.220949	0.722678	0.937037	0.963484	4512	PaF106G0400015672.01;PaF106G0600025015.01;PaF106G0200006792.01;PaF106G0100004078.01;PaF106G0600024342.01;PaF106G0100006451.01;PaF106G0400015786.01;PaF106G0100000225.01;PaF106G0100005597.01;PaF106G0100005900.01;PaF106G0800029923.01;PaF106G0500020161.01;PaF106G0400015788.01;PaF106G0500021117.01;PaF106G0200009506.01;PaF106G0800030626.01;PaF106G0400018401.01;PaF106G0100003899.01;PaF106G0800032521.01;…
GO:0030695	GTPase regulator activity	16	0.252271	0.595709	0.937262	0.963484	4183	PaF106G0600024435.01;PaF106G0500021231.01;PaF106G0400018401.01;PaF106G0100003899.01;PaF106G0300012678.01
GO:0030234	enzyme regulator activity	39	-0.234707	-0.682238	0.937888	0.963484	4969	PaF106G0300012078.01;PaF106G0600024910.01;PaF106G0400016045.01;PaF106G0800032140.01;PaF106G0100002441.01;PaF106G0400014772.01;PaF106G0300012679.01;PaF106G0300012225.01
GO:0002161	aminoacyl-tRNA editing activity	13	-0.254926	-0.571341	0.94375	0.963484	3946	PaF106G0100006671.01;PaF106G0800030490.01;PaF106G0400017693.01
GO:0031418	L-ascorbic acid binding	12	-0.246886	-0.542039	0.943867	0.963484	4490	PaF106G0500021165.01;PaF106G0600024221.01
GO:0003843	1,3-beta-D-glucan synthase activity	10	0.257564	0.539295	0.945525	0.963484	6320	PaF106G0300012501.01;PaF106G0200006820.01;PaF106G0500020338.01;PaF106G0300012987.01;PaF106G0400014915.01
GO:0043424	protein histidine kinase binding	10	0.257321	0.538785	0.945525	0.963484	8570	PaF106G0500020674.01;PaF106G0100003506.01;PaF106G0500019449.01;PaF106G0100000416.01;PaF106G0100003219.01;PaF106G0800029535.01;PaF106G0100001685.01
GO:0008092	cytoskeletal protein binding	21	-0.243006	-0.614356	0.946939	0.963484	4478	PaF106G0600023689.01;PaF106G0100000393.01;PaF106G0300011048.01;PaF106G0800031267.01;PaF106G0100002765.01;PaF106G0100005229.01
GO:0042803	protein homodimerization activity	42	0.22682	0.64968	0.948617	0.963484	6938	PaF106G0300011255.01;PaF106G0500018620.01;PaF106G0100000914.01;PaF106G0600023278.01;PaF106G0100001416.01;PaF106G0100001870.01;PaF106G0100001366.01;PaF106G0700028252.01;PaF106G0100002638.01;PaF106G0100004349.01;PaF106G0600021784.01;PaF106G0400014787.01;PaF106G0500019822.01;PaF106G0500018939.01;PaF106G0800031578.01;PaF106G0600021746.01;PaF106G0400018272.01;PaF106G0200009140.01
GO:0043130	ubiquitin binding	21	-0.234574	-0.593039	0.95102	0.963484	7775	PaF106G0100004035.01;PaF106G0800029519.01;PaF106G0400018273.01;PaF106G0800031335.01;PaF106G0100003684.01;PaF106G0300012078.01;PaF106G0100003680.01;PaF106G0600022747.01;PaF106G0800030877.01;PaF106G0100003360.01
GO:0060589	nucleoside-triphosphatase regulator activity	18	0.235052	0.564384	0.955513	0.963484	4183	PaF106G0600024435.01;PaF106G0500021231.01;PaF106G0400018401.01;PaF106G0100003899.01;PaF106G0300012678.01
GO:0019888	protein phosphatase regulator activity	17	0.241546	0.572995	0.957692	0.963484	3245	PaF106G0600024468.01;PaF106G0200010825.01;PaF106G0500020522.01
GO:0019901	protein kinase binding	22	-0.237231	-0.600792	0.960417	0.963484	2928	PaF106G0200008364.01;PaF106G0800029863.01;PaF106G0200010216.01;PaF106G0200008551.01;PaF106G0800030287.01
GO:0004175	endopeptidase activity	16	-0.237189	-0.560678	0.962185	0.963484	14814	PaF106G0200008715.01;PaF106G0100006512.01;PaF106G0400016897.01;PaF106G0100005711.01;PaF106G0100004456.01;PaF106G0300014162.01;PaF106G0400016649.01;PaF106G0100000230.01;PaF106G0100004213.01
GO:0043168	anion binding	49	0.217344	0.645558	0.964706	0.963484	4725	PaF106G0200010482.01;PaF106G0300010980.01;PaF106G0100001383.01;PaF106G0500020161.01;PaF106G0300012465.01;PaF106G0400017027.01;PaF106G0400018401.01;PaF106G0100003899.01;PaF106G0800029453.01;PaF106G0800032521.01;PaF106G0700027242.01;PaF106G0300012678.01;PaF106G0200008034.01;PaF106G0800029493.01;PaF106G0400016868.01;PaF106G0500019446.01
GO:0003724	RNA helicase activity	33	-0.217123	-0.606619	0.969136	0.963484	6214	PaF106G0100002553.01;PaF106G0500021032.01;PaF106G0400017317.01;PaF106G0400016651.01;PaF106G0200008486.01;PaF106G0100003130.01;PaF106G0700026795.01;PaF106G0100003155.01;PaF106G0600022534.01;PaF106G0100000758.01;Prunus_sibirica_newGene_551
GO:0008173	RNA methyltransferase activity	16	0.211981	0.500568	0.969582	0.963484	15302	PaF106G0200006924.01;PaF106G0100001699.01;PaF106G0300012274.01;PaF106G0600024013.01;PaF106G0800031458.01;PaF106G0200009814.01;PaF106G0100003066.01;PaF106G0800030867.01;PaF106G0600024746.01;PaF106G0700026452.01;PaF106G0300011031.01;PaF106G0300013998.01;PaF106G0100001701.01;PaF106G0700026506.01;PaF106G0600022567.01;PaF106G0400017247.01
GO:0000976	transcription regulatory region sequence-specific DNA binding	69	0.216559	0.687271	0.970149	0.963484	5181	PaF106G0200008233.01;PaF106G0300011662.01;PaF106G0600024149.01;PaF106G0600023626.01;PaF106G0200008781.01;PaF106G0300014434.01;PaF106G0100005891.01;PaF106G0300012734.01;PaF106G0100006319.01;PaF106G0600024523.01;PaF106G0300014123.01;PaF106G0200010418.01;PaF106G0200010252.01;PaF106G0100001431.01;PaF106G0600024570.01;PaF106G0200009903.01;PaF106G0200007454.01;PaF106G0300014126.01;PaF106G0100002725.01;…
GO:0008168	methyltransferase activity	113	-0.206028	-0.720634	0.972689	0.963484	7245	PaF106G0800030310.01;PaF106G0400014839.01;PaF106G0700026610.01;PaF106G0200006851.01;PaF106G0200008487.01;PaF106G0600024058.01;PaF106G0700027723.01;PaF106G0400016859.01;PaF106G0200009825.01;PaF106G0600025389.01;PaF106G0100000308.01;PaF106G0300013413.01;PaF106G0600024363.01;PaF106G0300012482.01;PaF106G0800032396.01;PaF106G0300011990.01;PaF106G0700027262.01;PaF106G0400017109.01;PaF106G0800030645.01;…
GO:0004725	protein tyrosine phosphatase activity	24	0.220707	0.564578	0.976834	0.963484	6372	PaF106G0100004732.01;PaF106G0700028755.01;PaF106G0500019230.01;PaF106G0700028744.01;PaF106G0200008003.01;PaF106G0300011539.01;PaF106G0500020179.01;PaF106G0300012126.01;PaF106G0300014619.01;PaF106G0800030997.01
GO:0046961	proton-transporting ATPase activity, rotational mechanism	14	-0.204283	-0.468849	0.979079	0.963484	1875	PaF106G0800031519.01;PaF106G0300011393.01;PaF106G0700027144.01;PaF106G0300014344.01;PaF106G0200010870.01;PaF106G0600021458.01;PaF106G0500018519.01;PaF106G0100005729.01;PaF106G0300012561.01;PaF106G0100005452.01;PaF106G0500019833.01;PaF106G0100004379.01
GO:0061659	ubiquitin-like protein ligase activity	23	-0.208593	-0.534095	0.981092	0.963484	5683	PaF106G0100002985.01;PaF106G0500020657.01;PaF106G0500019461.01;PaF106G0400015745.01;PaF106G0500019462.01;PaF106G0600024829.01
GO:0046933	proton-transporting ATP synthase activity, rotational mechanism	13	-0.213666	-0.478869	0.983333	0.963484	6372	PaF106G0800032232.01;PaF106G0400018138.01;PaF106G0600023358.01;PaF106G0400015699.01;PaF106G0200009279.01
GO:0019899	enzyme binding	53	0.205784	0.617901	0.984405	0.963484	4382	PaF106G0300011024.01;PaF106G0600021737.01;PaF106G0600024435.01;PaF106G0100005656.01;PaF106G0300012465.01;PaF106G0400017027.01;PaF106G0100001870.01;PaF106G0600022565.01;PaF106G0400015823.01;PaF106G0100003259.01;PaF106G0500020674.01;PaF106G0800029530.01
GO:0004721	phosphoprotein phosphatase activity	32	0.194952	0.536223	0.984848	0.963484	4921	PaF106G0400016269.01;PaF106G0400017448.01;PaF106G0600025344.01;PaF106G0100002759.01;PaF106G0100004514.01;PaF106G0300014070.01;PaF106G0100000475.01;PaF106G0600024808.01;PaF106G0100001764.01
GO:0042802	identical protein binding	52	0.200223	0.598465	0.986355	0.963484	3518	PaF106G0300013544.01;PaF106G0400017421.01;PaF106G0500018620.01;PaF106G0100000914.01;PaF106G0300012479.01;PaF106G0600023278.01;PaF106G0400017027.01;PaF106G0100001416.01;PaF106G0100001870.01
GO:0005319	lipid transporter activity	12	0.219163	0.481938	0.986564	0.963484	5525	PaF106G0800031477.01;PaF106G0500020699.01;PaF106G0600022477.01;PaF106G0800031479.01
GO:0031593	polyubiquitin modification-dependent protein binding	12	0.225853	0.496649	0.986564	0.963484	15032	PaF106G0100004204.01;PaF106G0600022235.01;PaF106G0800030422.01;PaF106G0800030633.01;PaF106G0300011788.01;PaF106G0700026069.01;PaF106G0300013407.01;PaF106G0300013700.01;PaF106G0600022650.01;PaF106G0700026990.01;PaF106G0100003684.01;PaF106G0100003680.01
GO:0005198	structural molecule activity	29	0.189013	0.510137	0.986767	0.963484	2398	PaF106G0800031242.01;PaF106G0300012943.01;PaF106G0100005390.01
GO:0005484	SNAP receptor activity	28	-0.204168	-0.544226	0.987179	0.963484	15457	PaF106G0200009941.01;PaF106G0500021204.01;PaF106G0200008602.01;PaF106G0500020824.01;PaF106G0400015701.01;PaF106G0500018860.01;PaF106G0300013520.01;PaF106G0200010856.01;PaF106G0700028009.01;PaF106G0300011482.01;PaF106G0600025318.01;PaF106G0700029195.01;PaF106G0100001247.01;PaF106G0100005394.01;PaF106G0200008801.01;PaF106G0500020856.01;PaF106G0200008346.01;PaF106G0100003345.01;PaF106G0600024370.01;…
GO:0008047	enzyme activator activity	25	-0.200346	-0.525318	0.989474	0.963484	4467	PaF106G0100000816.01;PaF106G0800031056.01;PaF106G0100002441.01;PaF106G0100002991.01;PaF106G0300012679.01
GO:0019787	ubiquitin-like protein transferase activity	56	0.184517	0.559768	0.992218	0.963484	6657	PaF106G0100002938.01;PaF106G0100003787.01;PaF106G0100005474.01;PaF106G0600025367.01;PaF106G0200009042.01;PaF106G0200007923.01;PaF106G0100001870.01;PaF106G0600024072.01;PaF106G0200008034.01;PaF106G0100003942.01;PaF106G0800029493.01;PaF106G0400016868.01;PaF106G0700027182.01;PaF106G0200010460.01;PaF106G0500020982.01;PaF106G0800032577.01;PaF106G0400014843.01;PaF106G0500018683.01;PaF106G0400016025.01;…
GO:0016757	transferase activity, transferring glycosyl groups	127	-0.190209	-0.671366	0.993658	0.963484	3949	PaF106G0800031362.01;PaF106G0500018809.01;PaF106G0600022702.01;PaF106G0200009938.01;PaF106G0400018268.01;PaF106G0400017306.01;PaF106G0400014708.01;PaF106G0700026465.01;PaF106G0300014417.01;PaF106G0100001300.01;PaF106G0300011285.01;PaF106G0300011675.01;PaF106G0400018134.01;PaF106G0200008135.01;PaF106G0100004834.01;PaF106G0300011089.01;PaF106G0700027337.01;PaF106G0100005594.01;PaF106G0200010176.01;…
GO:0016740	transferase activity	167	-0.187907	-0.686516	0.993697	0.963484	3322	PaF106G0800030533.01;PaF106G0100004621.01;PaF106G0400015745.01;PaF106G0800029856.01;PaF106G0800029863.01;PaF106G0100005167.01;PaF106G0600025339.01;PaF106G0500020128.01;PaF106G0800031267.01;PaF106G0500019462.01;PaF106G0800030287.01;PaF106G0500020831.01;PaF106G0600022026.01;PaF106G0400014802.01;PaF106G0400016761.01;PaF106G0100006612.01;PaF106G0800029457.01;PaF106G0600024829.01;PaF106G0600024625.01;…
GO:0070006	metalloaminopeptidase activity	10	0.198825	0.416305	0.994163	0.963484	15556	PaF106G0100005311.01;PaF106G0200008609.01;PaF106G0100005310.01;PaF106G0700027321.01;PaF106G0500020291.01;PaF106G0200010891.01;PaF106G0600025407.01;PaF106G0200008611.01;PaF106G0100003645.01;PaF106G0200008615.01
GO:0004386	helicase activity	71	-0.188801	-0.612492	0.995671	0.963484	920	PaF106G0300011199.01;PaF106G0600022625.01;PaF106G0700027029.01
GO:0003755	peptidyl-prolyl cis-trans isomerase activity	52	-0.179996	-0.556095	0.99591	0.963484	7257	PaF106G0700027489.01;PaF106G0100004928.01;PaF106G0100002463.01;PaF106G0200008734.01;PaF106G0200010361.01;PaF106G0200007000.01;PaF106G0600024688.01;PaF106G0700027919.01;PaF106G0400015037.01;PaF106G0600021709.01;PaF106G0500019127.01;PaF106G0800030663.01;PaF106G0400016626.01;PaF106G0300014611.01;PaF106G0800030230.01;PaF106G0100003258.01;PaF106G0100002706.01;PaF106G0100003333.01;PaF106G0100001027.01;…
GO:0019706	protein-cysteine S-palmitoyltransferase activity	21	-0.167328	-0.423031	0.995918	0.963484	16170	PaF106G0800031630.01;PaF106G0500019427.01;PaF106G0500020212.01;PaF106G0200009469.01;PaF106G0600024601.01;PaF106G0100004082.01;PaF106G0300012354.01;PaF106G0700028944.01;PaF106G0700026119.01;PaF106G0100002585.01;PaF106G0600025493.01;PaF106G0100003354.01;PaF106G0300010965.01;PaF106G0800032400.01;PaF106G0600022317.01;PaF106G0700027025.01;PaF106G0200008694.01;PaF106G0200009305.01;PaF106G0500018527.01;…
GO:0051536	iron-sulfur cluster binding	22	0.188531	0.474598	0.996169	0.963484	15758	PaF106G0800031580.01;PaF106G0300011191.01;PaF106G0100000968.01;PaF106G0600022087.01;PaF106G0800031072.01;PaF106G0300012637.01;PaF106G0600023564.01;PaF106G0200009814.01;PaF106G0100003066.01;PaF106G0200010685.01;PaF106G0100006130.01;PaF106G0800030292.01;PaF106G0800030867.01;PaF106G0600023420.01;PaF106G0300012635.01;PaF106G0300014544.01;PaF106G0300013872.01;PaF106G0200007870.01;PaF106G0500020321.01;…
GO:0051287	NAD binding	56	-0.171354	-0.534176	0.997951	0.963484	7283	PaF106G0400017244.01;PaF106G0500020302.01;PaF106G0500020308.01;PaF106G0800030611.01;PaF106G0800029832.01;PaF106G0300014067.01;PaF106G0200010131.01;PaF106G0200008768.01;PaF106G0800031229.01;PaF106G0100000325.01;PaF106G0800030968.01;PaF106G0700028485.01;PaF106G0500021241.01;PaF106G0100003957.01;PaF106G0100002834.01;PaF106G0700026512.01;PaF106G0100006429.01;PaF106G0400017248.01;PaF106G0100003393.01;…
GO:0003712	transcription cofactor activity	54	-0.159705	-0.498454	0.997976	0.963484	4625	PaF106G0400017289.01;PaF106G0300012523.01;PaF106G0300012715.01;PaF106G0500019725.01;PaF106G0100004525.01;PaF106G0600021696.01;PaF106G0600021698.01;PaF106G0100005405.01;PaF106G0600021697.01;PaF106G0400014772.01;PaF106G0800030962.01;PaF106G0700029076.01
GO:0000149	SNARE binding	28	0.141339	0.377518	1	0.963484	16674	PaF106G0300012095.01;PaF106G0100000873.01;PaF106G0600022546.01;PaF106G0200009941.01;PaF106G0500020824.01;PaF106G0400015701.01;PaF106G0100000141.01;PaF106G0700028009.01;PaF106G0300011482.01;PaF106G0700029195.01;PaF106G0100006044.01;PaF106G0100005394.01;PaF106G0200008346.01;PaF106G0100003908.01;PaF106G0100003345.01;PaF106G0700026206.01;PaF106G0400016547.01;PaF106G0600024370.01;PaF106G0300010913.01;…
GO:0003729	mRNA binding	115	-0.162235	-0.567792	1	0.963484	3602	PaF106G0800032140.01;PaF106G0100000025.01;PaF106G0200009323.01;PaF106G0500020346.01;PaF106G0700028470.01;PaF106G0100004993.01;PaF106G0100002744.01;PaF106G0100005985.01;PaF106G0100006034.01;PaF106G0100004611.01;PaF106G0800029514.01;PaF106G0600024648.01;PaF106G0300012225.01
GO:0004842	ubiquitin-protein transferase activity	160	-0.139305	-0.505876	1	0.963484	5683	PaF106G0400017508.01;PaF106G0300013860.01;PaF106G0800029764.01;PaF106G0200006947.01;PaF106G0600023331.01;PaF106G0800029599.01;PaF106G0100005714.01;PaF106G0500020599.01;PaF106G0600022316.01;PaF106G0100002985.01;Prunus_sibirica_newGene_898;PaF106G0200010515.01;PaF106G0500019220.01;PaF106G0500020657.01;PaF106G0600023689.01;PaF106G0500019461.01;PaF106G0600025154.01;PaF106G0100000343.01;PaF106G0100003…
GO:0005096	GTPase activator activity	44	0.163759	0.470315	1	0.963484	4473	PaF106G0600024435.01;PaF106G0100002525.01;PaF106G0100006089.01;PaF106G0400017256.01;PaF106G0500021231.01;PaF106G0400018401.01;PaF106G0100003899.01;PaF106G0500020172.01;PaF106G0300012678.01;PaF106G0200008055.01
GO:0008138	protein tyrosine/serine/threonine phosphatase activity	20	-0.159158	-0.396979	1	0.963484	2316	PaF106G0200009708.01;PaF106G0300011233.01;PaF106G0700028231.01;PaF106G0800029640.01;PaF106G0700026541.01;PaF106G0700028752.01;PaF106G0200010094.01;PaF106G0200007744.01
GO:0042393	histone binding	30	0.141926	0.388141	1	0.963484	5958	PaF106G0100000869.01;PaF106G0600024523.01;PaF106G0400015823.01;PaF106G0200010710.01;PaF106G0300011387.01;PaF106G0200007076.01;PaF106G0200009983.01;PaF106G0100005836.01;PaF106G0200009740.01;PaF106G0300014106.01
GO:0051537	2 iron, 2 sulfur cluster binding	24	-0.123827	-0.321662	1	0.963484	17014	PaF106G0100004080.01;PaF106G0600023214.01;PaF106G0600022745.01;PaF106G0100001465.01;PaF106G0200010382.01;PaF106G0500018961.01;PaF106G0100002218.01
GO:0061630	ubiquitin protein ligase activity	88	0.137274	0.453497	1	0.963484	5410	PaF106G0100005782.01;PaF106G0100003787.01;PaF106G0800030128.01;PaF106G0300013335.01;PaF106G0200009042.01;PaF106G0600024605.01;PaF106G0600024794.01;PaF106G0100001870.01;PaF106G0100004532.01;PaF106G0600024072.01;PaF106G0100005053.01;PaF106G0200008034.01;PaF106G0100005215.01;PaF106G0400016868.01;PaF106G0800030247.01;PaF106G0300012977.01;PaF106G0700027182.01;PaF106G0600024371.01;PaF106G0400017803.01;…
