# Supplementary material for: Mining for genes related to pistil abortion in Prunus sibirica L
Source: PeerJ. 2022 Nov 15;10:e14366. doi: 10.7717/peerj.14366 (PMC9673769; doi:10.7717/peerj.14366)
Supplement: Table S12 [file peerj-10-14366-s012.xls]

## Sheet: Sheet1
Table S12 GSEA analysis based on KEGG pathway in P. sibirica
ID	Description	setSize	enrichmentScore	NES	pvalue	qvalue	rank	core_enrichment
ko00941	Flavonoid biosynthesis	73	-0.619812	-2.0324	0.0018797	0.07194	2599	PaF106G0600023054.01;PaF106G0100000034.01;PaF106G0100002874.01;PaF106G0600024944.01;PaF106G0500020909.01;PaF106G0100000031.01;PaF106G0400016592.01;PaF106G0800030349.01;PaF106G0300013446.01;PaF106G0200009673.01;PaF106G0500019530.01;PaF106G0200009671.01;PaF106G0600021850.01;PaF106G0600025606.01;PaF106G0300013455.01;PaF106G0200010121.01;Prunus_sibirica_newGene_2003;PaF106G0100004453.01;PaF106G040001…
ko00500	Starch and sucrose metabolism	345	0.450234	1.78684	0.00191939	0.07194	2349	PaF106G0700028369.01;PaF106G0800032652.01;PaF106G0800032588.01;PaF106G0400014852.01;PaF106G0800031206.01;Prunus_sibirica_newGene_1338;PaF106G0800032487.01;PaF106G0800032547.01;PaF106G0800030461.01;PaF106G0800032447.01;PaF106G0800032875.01;PaF106G0700028366.01;PaF106G0400014718.01;PaF106G0800032661.01;PaF106G0200008436.01;PaF106G0100006049.01;PaF106G0200008357.01;PaF106G0800032319.01;PaF106G020000…
ko00909	Sesquiterpenoid and triterpenoid biosynthesis	26	-0.705104	-1.8759	0.00193424	0.07194	1685	PaF106G0600023366.01;PaF106G0400015860.01;PaF106G0300014306.01;PaF106G0400016816.01;PaF106G0400015872.01;PaF106G0300011916.01;PaF106G0400016817.01;PaF106G0300014305.01;PaF106G0400015902.01;PaF106G0400015900.01
ko00640	Propanoate metabolism	50	0.552966	1.69458	0.00635593	0.103964	1372	PaF106G0200007106.01;PaF106G0400016106.01;PaF106G0700029083.01;PaF106G0800032469.01;PaF106G0600023307.01;PaF106G0200009439.01;PaF106G0200009442.01;PaF106G0400016830.01
ko00061	Fatty acid biosynthesis	41	-0.605684	-1.75999	0.0075188	0.103964	5447	PaF106G0100006448.01;PaF106G0400017399.01;PaF106G0600024729.01;PaF106G0600021542.01;PaF106G0300013850.01;PaF106G0700026338.01;PaF106G0800030176.01;PaF106G0100000756.01;PaF106G0600021934.01;PaF106G0300011564.01;PaF106G0800031645.01;PaF106G0100002834.01;PaF106G0700028190.01;PaF106G0100005899.01;PaF106G0100001937.01;PaF106G0800031291.01;PaF106G0400015102.01;PaF106G0600021575.01;PaF106G0500019947.01;…
ko00240	Pyrimidine metabolism	76	-0.495364	-1.63134	0.0075188	0.103964	1640	PaF106G0500020845.01;PaF106G0200007574.01;PaF106G0200006784.01;PaF106G0700026673.01;PaF106G0300011065.01;PaF106G0300011005.01;PaF106G0600023335.01;PaF106G0400015116.01;PaF106G0800032869.01;PaF106G0100004499.01;PaF106G0300012173.01;PaF106G0400015032.01;PaF106G0600021550.01;PaF106G0500019095.01
ko00945	Stilbenoid, diarylheptanoid and gingerol biosynthesis	43	-0.597108	-1.76008	0.00756144	0.103964	1849	PaF106G0600024944.01;PaF106G0400016592.01;PaF106G0300013446.01;PaF106G0600021850.01;PaF106G0600025606.01;PaF106G0300013455.01;Prunus_sibirica_newGene_2003;PaF106G0400016586.01;PaF106G0400016584.01;PaF106G0200007469.01;PaF106G0100001890.01;PaF106G0700026579.01;PaF106G0400016595.01;PaF106G0300013244.01;PaF106G0300013106.01;PaF106G0300013243.01;PaF106G0400016578.01;PaF106G0400016580.01;PaF106G040001…
ko00910	Nitrogen metabolism	32	0.593482	1.65111	0.0083682	0.103964	2081	PaF106G0100001469.01;PaF106G0800032576.01;PaF106G0800032573.01;PaF106G0400015048.01;PaF106G0700027626.01;PaF106G0300011195.01;PaF106G0700027627.01;PaF106G0300012627.01;PaF106G0100006107.01;PaF106G0700029232.01;PaF106G0500019140.01;PaF106G0600024207.01
ko00460	Cyanoamino acid metabolism	85	0.470133	1.5864	0.00838574	0.103964	2631	PaF106G0300012327.01;PaF106G0100006049.01;PaF106G0300012392.01;PaF106G0700027870.01;PaF106G0300012396.01;PaF106G0100001087.01;PaF106G0500020431.01;PaF106G0300012319.01;Prunus_sibirica_newGene_155;PaF106G0400015976.01;PaF106G0300012314.01;PaF106G0700027595.01;PaF106G0400016282.01;PaF106G0300012320.01;PaF106G0600022775.01;PaF106G0400015877.01;PaF106G0200009036.01;PaF106G0700028280.01;PaF106G0300012…
ko01212	Fatty acid metabolism	66	-0.524362	-1.69245	0.00932836	0.104085	4661	PaF106G0600021542.01;PaF106G0300013850.01;PaF106G0500018834.01;PaF106G0100002908.01;PaF106G0700026338.01;PaF106G0200008452.01;PaF106G0100000756.01;PaF106G0600021934.01;PaF106G0300011564.01;PaF106G0800031645.01;PaF106G0100002834.01;PaF106G0700028190.01;PaF106G0100005899.01;PaF106G0100001937.01;PaF106G0800031291.01;PaF106G0400015102.01;PaF106G0600021575.01;PaF106G0200009798.01;PaF106G0500019947.01;…
ko00280	Valine, leucine and isoleucine degradation	72	0.479956	1.55865	0.0127932	0.129768	1635	PaF106G0200007106.01;PaF106G0700029083.01;PaF106G0800032469.01;PaF106G0600023307.01;PaF106G0100006004.01;PaF106G0100004891.01;PaF106G0200009439.01;PaF106G0100006001.01;PaF106G0800030728.01;PaF106G0200009442.01;PaF106G0400016830.01;PaF106G0800030723.01;PaF106G0400015063.01
ko00940	Phenylpropanoid biosynthesis	167	-0.392171	-1.43396	0.0139721	0.129916	2485	PaF106G0100000964.01;PaF106G0800031547.01;PaF106G0700027160.01;PaF106G0300013498.01;PaF106G0300011300.01;PaF106G0100002874.01;PaF106G0600024944.01;PaF106G0700029061.01;PaF106G0400016592.01;PaF106G0300013446.01;PaF106G0700027323.01;PaF106G0600021850.01;PaF106G0600025606.01;PaF106G0600021470.01;PaF106G0300013455.01;PaF106G0400017132.01;PaF106G0600021893.01;PaF106G0100003710.01;PaF106G0100003396.01;…
ko00062	Fatty acid elongation	33	-0.570775	-1.59797	0.0189036	0.151328	4536	PaF106G0500018834.01;PaF106G0100004718.01;PaF106G0100002908.01;PaF106G0200008452.01;PaF106G0100003695.01;PaF106G0600022397.01;PaF106G0800031442.01;PaF106G0200009682.01;PaF106G0200009798.01;PaF106G0600023966.01;PaF106G0100005459.01;PaF106G0200009680.01;PaF106G0800031436.01;PaF106G0200007733.01;PaF106G0200010395.01
ko04712	Circadian rhythm - plant	77	0.452379	1.49452	0.0189873	0.151328	2173	PaF106G0100002793.01;PaF106G0200010731.01;PaF106G0200009787.01;PaF106G0300012720.01;PaF106G0300011713.01;PaF106G0500020819.01;PaF106G0700029062.01;PaF106G0100001107.01;PaF106G0400017624.01;PaF106G0200009352.01;PaF106G0100003699.01;PaF106G0100003309.01;PaF106G0500020778.01;PaF106G0500021108.01;PaF106G0300011445.01;PaF106G0200010192.01;PaF106G0500020820.01;PaF106G0500019551.01
ko04016	MAPK signaling pathway - plant	280	0.334299	1.30103	0.0257426	0.191489	3655	PaF106G0100000980.01;PaF106G0600021559.01;PaF106G0600021563.01;PaF106G0800030733.01;PaF106G0600021566.01;PaF106G0200008156.01;PaF106G0400017491.01;PaF106G0100006458.01;PaF106G0300013592.01;PaF106G0700028629.01;PaF106G0100000568.01;PaF106G0400017490.01;PaF106G0600021600.01;PaF106G0100001985.01;PaF106G0800029853.01;PaF106G0600022022.01;PaF106G0800030730.01;PaF106G0100004783.01;PaF106G0500019669.01;…
ko00410	beta-Alanine metabolism	56	0.458149	1.43381	0.0508475	0.335556	3733	PaF106G0200007106.01;PaF106G0700029083.01;PaF106G0800032469.01;PaF106G0600023307.01;PaF106G0200009439.01;PaF106G0200009442.01;PaF106G0400016830.01;PaF106G0800030115.01;PaF106G0200007018.01;PaF106G0300013125.01;PaF106G0700026772.01;PaF106G0700026397.01;PaF106G0400018264.01;PaF106G0500020471.01;PaF106G0300014448.01;PaF106G0100003079.01
ko00402	Benzoxazinoid biosynthesis	13	-0.677902	-1.5351	0.0511247	0.335556	945	PaF106G0100000450.01;PaF106G0100000452.01;PaF106G0100000441.01;PaF106G0700027901.01
ko03022	Basal transcription factors	57	0.452465	1.4192	0.0606695	0.357625	297	PaF106G0800030463.01;Prunus_sibirica_newGene_167;PaF106G0100000121.01
ko00052	Galactose metabolism	91	0.397266	1.34469	0.0619658	0.357625	1040	PaF106G0500019567.01;PaF106G0100006528.01;Prunus_sibirica_newGene_1245;Prunus_sibirica_newGene_1238;PaF106G0100002570.01;PaF106G0600025229.01;PaF106G0300011189.01;PaF106G0700026639.01;PaF106G0500019921.01;Prunus_sibirica_newGene_264
ko00040	Pentose and glucuronate interconversions	161	0.343279	1.25414	0.0654762	0.357625	2841	PaF106G0500019567.01;PaF106G0100006528.01;PaF106G0700026834.01;PaF106G0600025342.01;PaF106G0400015069.01;Prunus_sibirica_newGene_1245;PaF106G0100005494.01;Prunus_sibirica_newGene_1238;PaF106G0300014137.01;PaF106G0100005503.01;PaF106G0100006531.01;PaF106G0600022200.01;PaF106G0700026837.01;PaF106G0300012152.01;PaF106G0300014581.01;PaF106G0600024645.01;PaF106G0300012162.01;Prunus_sibirica_newGene_26…
ko00350	Tyrosine metabolism	57	-0.433941	-1.35501	0.0687023	0.357625	4608	PaF106G0100000168.01;PaF106G0800032704.01;PaF106G0100000863.01;PaF106G0500020021.01;PaF106G0100002958.01;PaF106G0800032110.01;PaF106G0400017879.01;PaF106G0700028486.01;PaF106G0300013065.01;PaF106G0100006265.01;PaF106G0100001616.01;PaF106G0600023698.01;PaF106G0600023886.01;PaF106G0800032691.01;PaF106G0400017880.01;PaF106G0400017882.01;PaF106G0800032697.01;PaF106G0800032700.01;PaF106G0400017886.01;…
ko01040	Biosynthesis of unsaturated fatty acids	22	-0.553902	-1.43569	0.0729783	0.357625	1334	PaF106G0500018834.01;PaF106G0100002908.01;PaF106G0200009798.01;PaF106G0600023966.01;PaF106G0800032688.01;PaF106G0200007733.01
ko00511	Other glycan degradation	56	-0.436516	-1.35687	0.0754717	0.357625	4141	PaF106G0100005749.01;Prunus_sibirica_newGene_2394;PaF106G0300014061.01;PaF106G0100004032.01;PaF106G0400017667.01;PaF106G0100004394.01;PaF106G0600022681.01;PaF106G0100005747.01;Prunus_sibirica_newGene_1844;PaF106G0300010932.01;PaF106G0500020169.01;PaF106G0200009144.01;PaF106G0600025458.01;PaF106G0500020327.01;PaF106G0300011239.01;PaF106G0200009704.01;PaF106G0600025211.01;PaF106G0200010394.01;PaF10…
ko03410	Base excision repair	58	-0.427102	-1.34087	0.0803059	0.357625	3571	PaF106G0300013586.01;PaF106G0700028530.01;PaF106G0500020352.01;PaF106G0300012801.01;PaF106G0600025689.01;PaF106G0600025144.01;Prunus_sibirica_newGene_392;PaF106G0100003128.01;PaF106G0700028182.01;Prunus_sibirica_newGene_521;PaF106G0400016352.01;PaF106G0600022812.01;PaF106G0800029371.01;PaF106G0100004072.01;PaF106G0600022113.01;PaF106G0300011491.01;PaF106G0800032113.01;PaF106G0600023161.01
ko00260	Glycine, serine and threonine metabolism	78	-0.389507	-1.28605	0.082218	0.357625	5173	PaF106G0400016791.01;PaF106G0400015772.01;PaF106G0100000168.01;PaF106G0600023642.01;PaF106G0500020611.01;PaF106G0100002655.01;PaF106G0700026993.01;PaF106G0700027496.01;PaF106G0100000363.01;PaF106G0100002958.01;PaF106G0100006634.01;PaF106G0100001419.01;PaF106G0100003957.01;PaF106G0300013746.01;PaF106G0300014103.01;PaF106G0500018531.01;PaF106G0500018566.01;PaF106G0800029749.01;PaF106G0100006429.01;…
ko02010	ABC transporters	99	0.378651	1.29763	0.0833333	0.357625	2086	PaF106G0400015437.01;PaF106G0100001225.01;PaF106G0100001230.01;PaF106G0300013919.01;PaF106G0800029996.01;Prunus_sibirica_newGene_1780;PaF106G0400015974.01;PaF106G0800029993.01;PaF106G0800029394.01;PaF106G0800032614.01;PaF106G0800029415.01;PaF106G0700028053.01;PaF106G0100001226.01;PaF106G0800029999.01;Prunus_sibirica_newGene_938;PaF106G0200008247.01;PaF106G0100004168.01;PaF106G0600022055.01;PaF106…
ko03440	Homologous recombination	111	-0.359965	-1.26766	0.0872093	0.358024	4158	PaF106G0400014811.01;PaF106G0200007147.01;PaF106G0500020540.01;PaF106G0800030638.01;PaF106G0100005557.01;PaF106G0700028968.01;PaF106G0400017287.01;PaF106G0300013689.01;PaF106G0300011501.01;PaF106G0700028507.01;PaF106G0300011356.01;PaF106G0100004529.01;PaF106G0100005678.01;PaF106G0100003857.01;PaF106G0500021222.01;PaF106G0500020545.01;PaF106G0600025689.01;PaF106G0400014898.01;PaF106G0400015931.01;…
ko00780	Biotin metabolism	19	-0.58194	-1.46312	0.0898438	0.358024	2679	PaF106G0100006448.01;PaF106G0400017399.01;PaF106G0600021542.01;PaF106G0100002834.01;PaF106G0100005813.01;PaF106G0700028190.01;PaF106G0100002218.01;PaF106G0500019947.01;PaF106G0800032148.01;PaF106G0300013018.01
ko00908	Zeatin biosynthesis	27	-0.506633	-1.35832	0.0940499	0.361862	1136	PaF106G0400016209.01;PaF106G0600022159.01;PaF106G0300011576.01;PaF106G0600022158.01;PaF106G0200009897.01;PaF106G0600022161.01
ko00591	Linoleic acid metabolism	19	-0.561011	-1.4105	0.105469	0.368051	2450	PaF106G0600025402.01;PaF106G0600025399.01;PaF106G0100002824.01;PaF106G0600025400.01;PaF106G0600025398.01;PaF106G0200006848.01;PaF106G0200006845.01;PaF106G0200006844.01
ko00965	Betalain biosynthesis	12	-0.629726	-1.40712	0.111554	0.368051	495	PaF106G0500021285.01;PaF106G0400017290.01;PaF106G0100004475.01
ko00073	Cutin, suberine and wax biosynthesis	44	-0.436368	-1.29848	0.11236	0.368051	2657	PaF106G0200009014.01;PaF106G0700026507.01;PaF106G0600022924.01;PaF106G0200008264.01;PaF106G0600022928.01;PaF106G0200007948.01;PaF106G0200008262.01;PaF106G0600022944.01;PaF106G0200010391.01;PaF106G0500019717.01;PaF106G0200010393.01;PaF106G0800029787.01;PaF106G0100004614.01;PaF106G0600022919.01;PaF106G0600022918.01;PaF106G0800031033.01;PaF106G0200008745.01
ko00514	Other types of O-glycan biosynthesis	15	0.572783	1.38702	0.113281	0.368051	2379	PaF106G0200008939.01;PaF106G0200008937.01;PaF106G0400015015.01
ko00960	Tropane, piperidine and pyridine alkaloid biosynthesis	25	-0.506319	-1.34077	0.115607	0.368051	4978	PaF106G0100004603.01;PaF106G0100000168.01;PaF106G0100002958.01;PaF106G0800032110.01;PaF106G0300013065.01;PaF106G0100001616.01;PaF106G0300010986.01;PaF106G0600023698.01;PaF106G0600023886.01;PaF106G0600022188.01;Prunus_sibirica_newGene_1860;Prunus_sibirica_newGene_1788
ko00020	Citrate cycle (TCA cycle)	50	0.419403	1.28527	0.118644	0.368051	3520	PaF106G0400016106.01;PaF106G0400017668.01;PaF106G0200009736.01;PaF106G0400015674.01;PaF106G0300012085.01;PaF106G0600024076.01;PaF106G0700027007.01;PaF106G0400016787.01;PaF106G0600024077.01;PaF106G0300012562.01;PaF106G0100001302.01;PaF106G0300011206.01
ko03030	DNA replication	65	-0.396117	-1.26787	0.120301	0.368051	3254	PaF106G0100002579.01;PaF106G0300012801.01;PaF106G0400016862.01;PaF106G0600025689.01;PaF106G0100005768.01;PaF106G0600025144.01;Prunus_sibirica_newGene_392;PaF106G0700028182.01;Prunus_sibirica_newGene_521;PaF106G0400016352.01;PaF106G0700026115.01;Prunus_sibirica_newGene_1354;Prunus_sibirica_newGene_1393;PaF106G0100005353.01;PaF106G0400017398.01;Prunus_sibirica_newGene_2168;PaF106G0600022113.01;PaF1…
ko01200	Carbon metabolism	274	0.297611	1.15475	0.122047	0.368051	3520	PaF106G0200007106.01;PaF106G0400016106.01;PaF106G0700029083.01;PaF106G0800032469.01;PaF106G0200010874.01;PaF106G0600023307.01;PaF106G0400017668.01;PaF106G0300011999.01;PaF106G0200009439.01;PaF106G0400017850.01;PaF106G0200009736.01;PaF106G0200009920.01;PaF106G0400015674.01;PaF106G0200009036.01;PaF106G0200009442.01;PaF106G0400016830.01;PaF106G0300012085.01;PaF106G0600024076.01;PaF106G0700029232.01;…
ko00220	Arginine biosynthesis	34	0.451245	1.26828	0.133475	0.39192	2075	Prunus_sibirica_newGene_1925;PaF106G0100002821.01;PaF106G0300013544.01;PaF106G0300012627.01;PaF106G0700029232.01;PaF106G0500019140.01;PaF106G0400018092.01
ko03020	RNA polymerase	48	-0.416318	-1.25732	0.137476	0.39332	3956	PaF106G0400018413.01;PaF106G0200007420.01;PaF106G0600023167.01;PaF106G0100006651.01;PaF106G0200008149.01;PaF106G0600021675.01;PaF106G0300014098.01;PaF106G0300013145.01;PaF106G0700028337.01;PaF106G0200009271.01;PaF106G0100002762.01;PaF106G0700029076.01;PaF106G0600023687.01;PaF106G0300013028.01
ko00760	Nicotinate and nicotinamide metabolism	36	-0.445889	-1.27607	0.142045	0.396232	1574	PaF106G0200007574.01;PaF106G0700026673.01;PaF106G0400015188.01;PaF106G0100003842.01;PaF106G0500019095.01
ko00053	Ascorbate and aldarate metabolism	69	0.376037	1.22037	0.151899	0.407493	251	PaF106G0500019567.01;PaF106G0100006528.01;Prunus_sibirica_newGene_1245;Prunus_sibirica_newGene_1238;PaF106G0400016721.01
ko00261	Monobactam biosynthesis	11	-0.620522	-1.36914	0.153386	0.407493	4512	PaF106G0100003957.01;PaF106G0500018531.01;PaF106G0700025911.01;PaF106G0200008730.01;PaF106G0600023229.01
ko04075	Plant hormone signal transduction	409	0.272937	1.10061	0.176909	0.456756	2372	PaF106G0300012867.01;PaF106G0600021559.01;PaF106G0300012720.01;PaF106G0600021563.01;PaF106G0800030733.01;PaF106G0700027475.01;PaF106G0600021566.01;PaF106G0200008156.01;PaF106G0400017491.01;PaF106G0100006458.01;PaF106G0700027134.01;PaF106G0300013592.01;PaF106G0100000801.01;PaF106G0800031596.01;PaF106G0400017490.01;PaF106G0600021600.01;PaF106G0700027474.01;PaF106G0800030730.01;PaF106G0800031608.01;…
ko00071	Fatty acid degradation	64	-0.375957	-1.20021	0.181132	0.456756	2096	PaF106G0200010498.01;PaF106G0100001937.01;PaF106G0800031291.01;PaF106G0200010391.01;PaF106G0400014746.01;PaF106G0100001957.01;PaF106G0200010393.01;PaF106G0800032697.01;PaF106G0800032700.01;PaF106G0800031286.01;PaF106G0300014540.01;PaF106G0800030081.01;PaF106G0200008745.01
ko00950	Isoquinoline alkaloid biosynthesis	40	-0.420417	-1.21601	0.184211	0.456756	3843	PaF106G0400017879.01;PaF106G0100004785.01;PaF106G0300013065.01;PaF106G0100001616.01;PaF106G0700026125.01;PaF106G0600023698.01;PaF106G0400017880.01;PaF106G0400017882.01;PaF106G0400017886.01;PaF106G0400017887.01;PaF106G0400017881.01;PaF106G0400017885.01;PaF106G0800031339.01;PaF106G0400015254.01;PaF106G0400017290.01
ko00513	Various types of N-glycan biosynthesis	45	-0.403119	-1.20308	0.197761	0.479695	6453	PaF106G0700026476.01;PaF106G0300014404.01;PaF106G0400018182.01;PaF106G0100004827.01;PaF106G0400015350.01;PaF106G0400016484.01;PaF106G0200006793.01;PaF106G0100000855.01;PaF106G0400016271.01;PaF106G0300012214.01;Prunus_sibirica_newGene_2339;PaF106G0800030398.01;PaF106G0200009707.01;PaF106G0200008371.01;Prunus_sibirica_newGene_1608;Prunus_sibirica_newGene_965;PaF106G0200009704.01;Prunus_sibirica_new…
ko00902	Monoterpenoid biosynthesis	19	0.501816	1.24323	0.204082	0.484494	970	PaF106G0100002813.01;PaF106G0100002801.01;PaF106G0400015367.01;PaF106G0600023222.01;PaF106G0100002800.01;PaF106G0100002809.01;PaF106G0500019643.01
ko00051	Fructose and mannose metabolism	80	0.350404	1.16306	0.218684	0.508344	5053	PaF106G0800032665.01;PaF106G0400017850.01;PaF106G0700027740.01;PaF106G0400018283.01;PaF106G0100005597.01;PaF106G0800032531.01;PaF106G0600024089.01;PaF106G0500019619.01;PaF106G0700026545.01;PaF106G0100001383.01;PaF106G0400015149.01;PaF106G0200009816.01;PaF106G0400018280.01;PaF106G0100006052.01;PaF106G0400018282.01;PaF106G0200008879.01;PaF106G0800032915.01;PaF106G0300013946.01;PaF106G0100002075.01;…
ko00966	Glucosinolate biosynthesis	10	0.570133	1.23632	0.223969	0.510004	1429	PaF106G0100004891.01;PaF106G0700027595.01;PaF106G0800030728.01;PaF106G0800030723.01
ko01210	2-Oxocarboxylic acid metabolism	54	0.369597	1.14925	0.25523	0.566056	1465	Prunus_sibirica_newGene_1925;PaF106G0300013544.01;PaF106G0100004891.01;PaF106G0700027595.01;PaF106G0800030728.01;PaF106G0800030723.01;PaF106G0300012085.01
ko03420	Nucleotide excision repair	79	0.335675	1.11358	0.26327	0.566056	941	PaF106G0800030463.01;PaF106G0100005274.01;PaF106G0300013971.01;PaF106G0800032611.01;PaF106G0200008359.01
ko00564	Glycerophospholipid metabolism	108	0.3177	1.11041	0.263804	0.566056	4250	PaF106G0700027537.01;PaF106G0700027536.01;PaF106G0300014536.01;PaF106G0300014027.01;PaF106G0200009839.01;PaF106G0200008090.01;PaF106G0400017663.01;PaF106G0400015016.01;PaF106G0800032354.01;PaF106G0100004926.01;PaF106G0100000775.01;PaF106G0300011881.01;PaF106G0400015300.01;PaF106G0500019546.01;PaF106G0100004530.01;PaF106G0200008500.01;PaF106G0400018312.01;PaF106G0100006652.01;PaF106G0700028566.01;…
ko00603	Glycosphingolipid biosynthesis - globo and isoglobo series	11	-0.538289	-1.1877	0.276892	0.575911	6024	PaF106G0200006793.01;PaF106G0200009707.01;PaF106G0400017891.01;PaF106G0800030708.01;PaF106G0400017858.01;PaF106G0200009704.01
ko00905	Brassinosteroid biosynthesis	29	-0.413848	-1.1283	0.278719	0.575911	1888	PaF106G0100003471.01;PaF106G0100003481.01;PaF106G0800032619.01;PaF106G0200007737.01;PaF106G0700028234.01
ko00565	Ether lipid metabolism	31	0.403263	1.11666	0.294979	0.589931	4171	PaF106G0300014027.01;PaF106G0200008090.01;PaF106G0400015016.01;PaF106G0100000775.01;PaF106G0500019546.01;PaF106G0100006652.01;PaF106G0700028566.01;PaF106G0700026007.01;PaF106G0500020252.01;PaF106G0100005570.01;PaF106G0700027156.01;PaF106G0200008784.01;PaF106G0600023655.01
ko00230	Purine metabolism	113	-0.306888	-1.08054	0.296078	0.589931	2622	PaF106G0700026958.01;PaF106G0100006244.01;PaF106G0400018169.01;PaF106G0100000718.01;PaF106G0800032659.01;PaF106G0500019355.01;PaF106G0200007805.01;PaF106G0200007574.01;PaF106G0700026673.01;PaF106G0300011005.01;PaF106G0600023335.01;PaF106G0800031951.01;PaF106G0600022511.01;Prunus_sibirica_newGene_1019;PaF106G0500019095.01
ko03013	RNA transport	216	-0.275229	-1.04834	0.305835	0.59868	3372	PaF106G0100005371.01;PaF106G0500020347.01;PaF106G0200010351.01;PaF106G0400016478.01;PaF106G0500018731.01;PaF106G0300011169.01;PaF106G0400014844.01;PaF106G0400015664.01;PaF106G0200008802.01;PaF106G0300014176.01;PaF106G0500020346.01;PaF106G0700028475.01;PaF106G0800030156.01;PaF106G0700028470.01;PaF106G0500021038.01;PaF106G0100000142.01;PaF106G0500020688.01;PaF106G0700027403.01;PaF106G0100002937.01;…
ko00710	Carbon fixation in photosynthetic organisms	75	0.326774	1.07424	0.324895	0.61069	5095	PaF106G0400017668.01;PaF106G0400017850.01;PaF106G0200009920.01;PaF106G0600024076.01;PaF106G0700027740.01;PaF106G0100005597.01;PaF106G0800032531.01;PaF106G0500019619.01;PaF106G0400016787.01;PaF106G0200009816.01;PaF106G0500018760.01;PaF106G0600024077.01;PaF106G0100003601.01;PaF106G0200008879.01;PaF106G0400016641.01;PaF106G0100001702.01;PaF106G0400016723.01;PaF106G0100002075.01;PaF106G0300013925.01;…
ko00300	Lysine biosynthesis	16	-0.472788	-1.1353	0.325301	0.61069	3583	PaF106G0500018531.01;PaF106G0500018566.01;PaF106G0800030718.01;PaF106G0700025911.01;PaF106G0800031476.01;PaF106G0200008730.01;PaF106G0800030717.01;PaF106G0600023229.01;PaF106G0100006456.01
ko00900	Terpenoid backbone biosynthesis	46	0.364247	1.09836	0.32839	0.61069	372	PaF106G0800031390.01;PaF106G0600024011.01
ko00944	Flavone and flavonol biosynthesis	12	0.479407	1.09247	0.354	0.647524	2645	PaF106G0300011602.01;PaF106G0300011608.01;PaF106G0300011597.01;PaF106G0700027660.01
ko00906	Carotenoid biosynthesis	48	0.35091	1.06942	0.36518	0.657201	2416	PaF106G0100001047.01;PaF106G0800031024.01;PaF106G0700027524.01;PaF106G0800031073.01;PaF106G0500020669.01;PaF106G0800029742.01;PaF106G0500018596.01;PaF106G0200010557.01;PaF106G0600022230.01;PaF106G0800029507.01
ko00520	Amino sugar and nucleotide sugar metabolism	149	-0.282582	-1.02468	0.39604	0.691994	1554	PaF106G0600022303.01;PaF106G0100003051.01;PaF106G0100003393.01;PaF106G0500018822.01;PaF106G0300012547.01;PaF106G0100002490.01;PaF106G0400015420.01;PaF106G0100004820.01;PaF106G0100002489.01;PaF106G0800031067.01;PaF106G0200009704.01;PaF106G0100005910.01;PaF106G0700026044.01;PaF106G0700026042.01;Prunus_sibirica_newGene_1866;PaF106G0100002481.01;PaF106G0600024068.01;PaF106G0100006463.01;PaF106G060002…
ko00340	Histidine metabolism	25	-0.400508	-1.06057	0.396917	0.691994	3939	PaF106G0800032110.01;PaF106G0800032744.01;PaF106G0300012338.01;PaF106G0100000187.01;PaF106G0800031491.01;PaF106G0700027166.01;PaF106G0600023886.01;PaF106G0400015669.01;PaF106G0400014746.01;PaF106G0700027092.01;PaF106G0400017245.01
ko00592	alpha-Linolenic acid metabolism	63	0.32004	1.0287	0.41875	0.718826	1353	PaF106G0500021188.01;PaF106G0200006850.01;PaF106G0700027537.01;PaF106G0800030242.01;PaF106G0700027536.01;PaF106G0800030239.01;PaF106G0400017663.01;PaF106G0100004447.01;PaF106G0400017789.01;PaF106G0100006332.01
ko00970	Aminoacyl-tRNA biosynthesis	90	0.294716	0.999279	0.447257	0.754871	960	PaF106G0500018894.01;PaF106G0300012043.01;PaF106G0800031748.01;PaF106G0200007152.01;PaF106G0700027288.01;PaF106G0100000986.01
ko00400	Phenylalanine, tyrosine and tryptophan biosynthesis	47	-0.334776	-1.00403	0.459924	0.754871	6869	PaF106G0700027597.01;PaF106G0300013124.01;PaF106G0300013575.01;PaF106G0300012236.01;PaF106G0300011500.01;PaF106G0600022468.01;PaF106G0100006007.01;PaF106G0500019129.01;PaF106G0400015772.01;PaF106G0600023522.01;PaF106G0100004603.01;PaF106G0100003986.01;PaF106G0100000363.01;PaF106G0200008684.01;PaF106G0800032110.01;PaF106G0400018222.01;PaF106G0600023849.01;PaF106G0300013065.01;PaF106G0100001616.01;…
ko00380	Tryptophan metabolism	55	0.316555	0.984153	0.465812	0.754871	1584	PaF106G0800029503.01;PaF106G0800030520.01;PaF106G0800030444.01;PaF106G0100000062.01;PaF106G0600023983.01;PaF106G0100005269.01;PaF106G0800030656.01;PaF106G0400015674.01;PaF106G0100003004.01;PaF106G0800030655.01
ko00630	Glyoxylate and dicarboxylate metabolism	93	0.292279	0.991224	0.466809	0.754871	3408	PaF106G0100001469.01;PaF106G0600024632.01;PaF106G0400017668.01;PaF106G0300011999.01;PaF106G0600024874.01;PaF106G0500019663.01;PaF106G0300012627.01;PaF106G0300012085.01;PaF106G0100005850.01;PaF106G0600024207.01;PaF106G0500019665.01;PaF106G0100001425.01;PaF106G0400016787.01;PaF106G0400014686.01;PaF106G0400018408.01;PaF106G0600021657.01;PaF106G0200010441.01;PaF106G0300012562.01;PaF106G0100001302.01
ko03008	Ribosome biogenesis in eukaryotes	136	-0.274078	-0.986518	0.474806	0.755342	4307	PaF106G0200010846.01;PaF106G0100000931.01;PaF106G0200010829.01;PaF106G0800031892.01;PaF106G0700026200.01;PaF106G0500019035.01;PaF106G0500021008.01;PaF106G0500018488.01;PaF106G0500019077.01;PaF106G0400018156.01;PaF106G0300013562.01;PaF106G0600025329.01;PaF106G0600021505.01;PaF106G0400014844.01;PaF106G0800029759.01;PaF106G0800031448.01;PaF106G0400015664.01;PaF106G0800032899.01;PaF106G0300013889.01;…
ko03060	Protein export	59	0.310702	0.980595	0.48218	0.755342	1420	PaF106G0400017578.01;PaF106G0400018178.01;PaF106G0400017564.01;PaF106G0800030704.01;PaF106G0300011000.01
ko00904	Diterpenoid biosynthesis	27	0.360896	0.974447	0.494802	0.755342	2358	PaF106G0600023074.01;PaF106G0100001314.01;PaF106G0400016458.01;PaF106G0300013739.01;PaF106G0800030200.01;PaF106G0100004585.01;PaF106G0200008777.01;PaF106G0200010411.01;PaF106G0200009989.01
ko03050	Proteasome	59	-0.308549	-0.972063	0.499048	0.755342	1825	PaF106G0500020560.01;PaF106G0500018638.01;PaF106G0100005279.01;PaF106G0100001057.01;PaF106G0200010538.01
ko00480	Glutathione metabolism	83	-0.292554	-0.976946	0.500949	0.755342	3353	PaF106G0100003185.01;PaF106G0100005774.01;PaF106G0200008132.01;PaF106G0200008364.01;PaF106G0600025195.01;PaF106G0200010216.01;PaF106G0100005575.01;PaF106G0200008551.01;PaF106G0400016496.01;PaF106G0300011005.01;PaF106G0600023335.01;PaF106G0800029457.01;PaF106G0100000658.01;PaF106G0600024407.01;PaF106G0400016502.01
ko04146	Peroxisome	109	-0.279991	-0.977558	0.507843	0.755528	3380	PaF106G0600022923.01;PaF106G0800029361.01;PaF106G0700028765.01;PaF106G0700028800.01;PaF106G0800031645.01;PaF106G0100004101.01;PaF106G0100001322.01;PaF106G0600022924.01;PaF106G0400017347.01;PaF106G0700027184.01;PaF106G0100001937.01;PaF106G0800031291.01;PaF106G0300014178.01;PaF106G0600022928.01;PaF106G0300011820.01;PaF106G0600022944.01;PaF106G0400017678.01;PaF106G0100001957.01;PaF106G0200010198.01;…
ko03430	Mismatch repair	60	0.303838	0.962855	0.516878	0.758851	927	PaF106G0400017010.01;PaF106G0100005274.01;PaF106G0300013971.01;PaF106G0800032611.01
ko00130	Ubiquinone and other terpenoid-quinone biosynthesis	51	-0.312593	-0.955174	0.529412	0.767159	4738	PaF106G0200010845.01;PaF106G0100001040.01;PaF106G0400014799.01;PaF106G0500019033.01;PaF106G0500019389.01;Prunus_sibirica_newGene_1570;PaF106G0300013065.01;PaF106G0100001616.01;PaF106G0100000976.01;PaF106G0100003018.01;PaF106G0600021850.01;PaF106G0500021140.01;PaF106G0500020293.01;PaF106G0700027591.01;PaF106G0300013389.01;PaF106G0700027580.01
ko04141	Protein processing in endoplasmic reticulum	288	-0.246377	-0.96816	0.541414	0.774493	1143	PaF106G0600022140.01;Prunus_sibirica_newGene_965;PaF106G0400018159.01;PaF106G0700027002.01;PaF106G0300014431.01;PaF106G0700027849.01;PaF106G0300011891.01;PaF106G0300012744.01;PaF106G0700027837.01;PaF106G0500018911.01;PaF106G0700027850.01;Prunus_sibirica_newGene_2024;PaF106G0500018912.01;PaF106G0400015614.01;Prunus_sibirica_newGene_1378
ko00750	Vitamin B6 metabolism	15	0.372606	0.902284	0.576172	0.810751	235	PaF106G0800032168.01
ko00195	Photosynthesis	40	-0.318434	-0.921032	0.584586	0.810751	4872	PaF106G0400015699.01;PaF106G0500018961.01;PaF106G0300011816.01;PaF106G0700028638.01;PaF106G0300014496.01;PaF106G0100003320.01;PaF106G0200009279.01;PaF106G0100004066.01;PaF106G0800031095.01;PaF106G0800032177.01
ko03010	Ribosome	296	-0.240811	-0.946445	0.594705	0.810751	8100	PaF106G0300011423.01;PaF106G0300011012.01;PaF106G0300014207.01;PaF106G0100006507.01;PaF106G0400017461.01;PaF106G0100000482.01;PaF106G0200010027.01;PaF106G0600025595.01;PaF106G0400015836.01;PaF106G0400014638.01;PaF106G0700027189.01;PaF106G0800029682.01;PaF106G0800031713.01;PaF106G0600023291.01;PaF106G0100002671.01;PaF106G0600022960.01;PaF106G0400017657.01;PaF106G0300012966.01;PaF106G0500019112.01;…
ko00531	Glycosaminoglycan degradation	35	-0.318906	-0.905742	0.595825	0.810751	4141	PaF106G0600025364.01;Prunus_sibirica_newGene_2394;PaF106G0300014061.01;PaF106G0500020607.01;PaF106G0100004032.01;PaF106G0100004394.01;PaF106G0800030606.01;Prunus_sibirica_newGene_1844;PaF106G0500020853.01;PaF106G0100001557.01;PaF106G0100005603.01;PaF106G0200009704.01
ko04144	Endocytosis	224	0.250227	0.944078	0.603734	0.811615	3930	PaF106G0300011070.01;PaF106G0700027867.01;PaF106G0800030402.01;PaF106G0300014027.01;PaF106G0800031408.01;PaF106G0700027477.01;PaF106G0300013802.01;PaF106G0700028640.01;PaF106G0400016109.01;PaF106G0500020339.01;PaF106G0100006050.01;PaF106G0100005517.01;PaF106G0500020340.01;PaF106G0700027363.01;PaF106G0300011805.01;PaF106G0200007405.01;PaF106G0100004197.01;PaF106G0700027839.01;PaF106G0600024282.01;…
ko00250	Alanine, aspartate and glutamate metabolism	53	-0.298242	-0.915796	0.619048	0.812456	4608	PaF106G0600023642.01;PaF106G0600025837.01;PaF106G0500021315.01;PaF106G0100004771.01;PaF106G0100006634.01;PaF106G0100006123.01;PaF106G0700028440.01;PaF106G0700027652.01;PaF106G0600023427.01;PaF106G0500021258.01;PaF106G0300014113.01;PaF106G0800031951.01;PaF106G0600021550.01
ko00270	Cysteine and methionine metabolism	106	0.266006	0.927093	0.620408	0.812456	2573	PaF106G0100000246.01;PaF106G0600021498.01;PaF106G0500020036.01;PaF106G0400017668.01;PaF106G0100003565.01;PaF106G0500019685.01;PaF106G0100004891.01;PaF106G0300011223.01;PaF106G0200006804.01;PaF106G0800030728.01;PaF106G0200009036.01;PaF106G0800030723.01;PaF106G0400018287.01;PaF106G0200009081.01;PaF106G0800029309.01;PaF106G0800030680.01;PaF106G0600025564.01;PaF106G0400016787.01;PaF106G0700029033.01
ko00290	Valine, leucine and isoleucine biosynthesis	23	-0.336506	-0.882955	0.626204	0.812456	3646	PaF106G0100000593.01;PaF106G0600024115.01;PaF106G0400017765.01;PaF106G0100000035.01;PaF106G0300013202.01;PaF106G0400016216.01;PaF106G0500019260.01;PaF106G0600023466.01;PaF106G0600022783.01
ko00620	Pyruvate metabolism	93	-0.266076	-0.915663	0.639252	0.814548	4358	PaF106G0500020774.01;PaF106G0300014353.01;PaF106G0400014752.01;PaF106G0100000316.01;PaF106G0100001419.01;PaF106G0100000756.01;PaF106G0700027008.01;PaF106G0800030761.01;PaF106G0500021020.01;PaF106G0300011564.01;PaF106G0200010617.01;PaF106G0700027166.01;PaF106G0100003677.01;PaF106G0100000591.01;PaF106G0100005899.01;PaF106G0500019336.01;PaF106G0800032112.01;PaF106G0100001861.01;PaF106G0400015102.01;…
ko00943	Isoflavonoid biosynthesis	15	0.350169	0.847951	0.646484	0.814548	1723	PaF106G0300011602.01;PaF106G0300011608.01;PaF106G0300011597.01
ko00563	Glycosylphosphatidylinositol (GPI)-anchor biosynthesis	38	-0.308419	-0.884997	0.649718	0.814548	1243	PaF106G0300011287.01;PaF106G0500020594.01
ko00196	Photosynthesis - antenna proteins	17	-0.349327	-0.852226	0.657315	0.814916	7065	PaF106G0800030884.01;PaF106G0600023109.01;PaF106G0300012505.01;PaF106G0400015937.01;PaF106G0200009956.01;PaF106G0500020784.01;PaF106G0500018484.01;PaF106G0400017422.01
ko00030	Pentose phosphate pathway	63	0.273321	0.87853	0.670833	0.820509	4331	PaF106G0800032665.01;PaF106G0400017850.01;PaF106G0700027740.01;PaF106G0400018283.01;PaF106G0500019006.01;PaF106G0800032531.01;PaF106G0700026545.01;PaF106G0400018280.01;PaF106G0100006052.01;PaF106G0400018282.01;PaF106G0700026023.01;PaF106G0100002075.01;PaF106G0100005177.01;PaF106G0600021720.01;PaF106G0100003912.01;PaF106G0200010726.01
ko00562	Inositol phosphate metabolism	101	0.264221	0.907999	0.676533	0.820509	4308	PaF106G0200008090.01;PaF106G0400015016.01;PaF106G0500020977.01;PaF106G0100004293.01;PaF106G0100006258.01;PaF106G0200007238.01;PaF106G0100005597.01;PaF106G0800032352.01;PaF106G0200009337.01;PaF106G0300012951.01;PaF106G0500019619.01;PaF106G0700028699.01;PaF106G0200009816.01;PaF106G0700028412.01;PaF106G0100004054.01;PaF106G0200008879.01;PaF106G0600023731.01;PaF106G0500020252.01;PaF106G0700026988.01;…
ko01230	Biosynthesis of amino acids	249	-0.237609	-0.915969	0.711694	0.845713	4693	PaF106G0700028599.01;PaF106G0100004603.01;PaF106G0200008880.01;PaF106G0600025178.01;PaF106G0100002655.01;PaF106G0700026002.01;PaF106G0500019004.01;PaF106G0600025603.01;PaF106G0700027741.01;PaF106G0100003986.01;PaF106G0700026993.01;PaF106G0600023906.01;PaF106G0700027496.01;PaF106G0100000363.01;PaF106G0600024521.01;PaF106G0200008684.01;PaF106G0400017086.01;PaF106G0800032110.01;PaF106G0800032744.01;…
ko00561	Glycerolipid metabolism	101	0.259994	0.893476	0.712474	0.845713	4617	PaF106G0300014536.01;PaF106G0200009839.01;PaF106G0100006311.01;PaF106G0600024645.01;PaF106G0100001357.01;PaF106G0400015680.01;PaF106G0100005205.01;PaF106G0600024649.01;PaF106G0300011881.01;PaF106G0100004156.01;PaF106G0400015300.01;PaF106G0500021217.01;PaF106G0100004530.01;PaF106G0700026772.01;PaF106G0400017476.01;PaF106G0600022782.01;PaF106G0500019056.01;PaF106G0200008889.01;PaF106G0700028566.01;…
ko04120	Ubiquitin mediated proteolysis	177	-0.239194	-0.885213	0.744511	0.855253	2797	PaF106G0400014692.01;PaF106G0600024161.01;PaF106G0800030610.01;PaF106G0600025498.01;PaF106G0100000437.01;PaF106G0300012476.01;PaF106G0300011663.01;PaF106G0300012651.01;PaF106G0500019722.01;PaF106G0700026994.01;PaF106G0700027628.01;PaF106G0400015143.01;PaF106G0600024108.01;PaF106G0100002290.01;PaF106G0400014876.01;PaF106G0200009992.01;PaF106G0200010477.01;PaF106G0400017940.01;PaF106G0500019937.01;…
ko00860	Porphyrin and chlorophyll metabolism	52	-0.272897	-0.836607	0.747628	0.855253	5040	PaF106G0700028422.01;PaF106G0400017518.01;PaF106G0100006353.01;Prunus_sibirica_newGene_1833;PaF106G0100004112.01;PaF106G0800032716.01;PaF106G0100000650.01;PaF106G0100005725.01;PaF106G0100000266.01;PaF106G0100005138.01;PaF106G0700026365.01;PaF106G0400016291.01;PaF106G0400015114.01;PaF106G0100000656.01
ko00590	Arachidonic acid metabolism	31	0.295966	0.81955	0.751046	0.855253	3591	PaF106G0200010499.01;PaF106G0700026547.01;PaF106G0500019677.01;PaF106G0100000775.01;PaF106G0500020146.01;PaF106G0200010694.01;PaF106G0700028566.01;PaF106G0600023638.01;PaF106G0700027185.01
ko00740	Riboflavin metabolism	32	0.295111	0.821021	0.757322	0.855253	2909	PaF106G0500021274.01;PaF106G0100003994.01;PaF106G0600022382.01;PaF106G0500019687.01;PaF106G0800031840.01;PaF106G0200008818.01
ko04070	Phosphatidylinositol signaling system	87	0.254665	0.863835	0.758836	0.855253	3933	PaF106G0500019267.01;PaF106G0500020977.01;PaF106G0100004293.01;PaF106G0100006258.01;PaF106G0200007238.01;PaF106G0300011881.01;PaF106G0800032352.01;PaF106G0200009337.01;PaF106G0700026191.01;PaF106G0300012951.01;PaF106G0700028699.01;PaF106G0700028412.01;PaF106G0400018312.01;PaF106G0300011375.01;PaF106G0700026988.01;PaF106G0600025376.01;PaF106G0400018348.01;PaF106G0100005826.01;PaF106G0700028934.01;…
ko00920	Sulfur metabolism	35	0.280714	0.794956	0.783158	0.873839	3762	PaF106G0300012036.01;PaF106G0400018230.01;PaF106G0200009036.01;PaF106G0600025564.01;PaF106G0100002769.01;PaF106G0700029228.01;PaF106G0400015682.01;PaF106G0400017909.01;PaF106G0300011018.01;PaF106G0400017954.01
ko00360	Phenylalanine metabolism	34	-0.278133	-0.785629	0.79434	0.87754	4608	PaF106G0100000168.01;PaF106G0100000863.01;PaF106G0100002958.01;PaF106G0800032110.01;PaF106G0300013065.01;PaF106G0100001616.01;PaF106G0200009496.01;PaF106G0600023698.01;PaF106G0600023886.01;PaF106G0400016068.01;PaF106G0400017290.01
ko04136	Autophagy - other	44	0.25901	0.775039	0.809829	0.881271	4262	PaF106G0400018133.01;PaF106G0700028058.01;PaF106G0600023437.01;PaF106G0100001264.01;PaF106G0600023439.01;PaF106G0600024523.01;PaF106G0800029864.01;PaF106G0400018132.01;PaF106G0600024657.01
ko03040	Spliceosome	291	-0.224994	-0.88322	0.815789	0.881271	827	PaF106G0700027849.01;PaF106G0200009605.01;PaF106G0200007390.01;PaF106G0200007291.01;PaF106G0200007369.01;PaF106G0200007328.01;PaF106G0200007295.01;PaF106G0300011891.01;PaF106G0200007243.01;PaF106G0200007071.01;PaF106G0200007240.01;PaF106G0700027837.01;PaF106G0200007289.01;PaF106G0700027850.01;PaF106G0800032461.01;Prunus_sibirica_newGene_1378
ko00730	Thiamine metabolism	32	0.277302	0.771476	0.82636	0.881271	2983	PaF106G0600024011.01;PaF106G0700028399.01;PaF106G0400018100.01;PaF106G0100004823.01;PaF106G0100005209.01;PaF106G0700026104.01
ko00510	N-Glycan biosynthesis	58	-0.251411	-0.789298	0.835564	0.881271	1325	Prunus_sibirica_newGene_965;Prunus_sibirica_newGene_2024
ko00450	Selenocompound metabolism	17	-0.284693	-0.694542	0.841683	0.881271	3087	PaF106G0200008483.01;PaF106G0800030168.01;PaF106G0500018829.01;PaF106G0200008474.01
ko00770	Pantothenate and CoA biosynthesis	48	-0.254167	-0.76761	0.845574	0.881271	3939	PaF106G0400014752.01;PaF106G0600024115.01;PaF106G0400017765.01;PaF106G0100000035.01;PaF106G0300013202.01;PaF106G0700027166.01;PaF106G0400016216.01;PaF106G0400014746.01;PaF106G0500019009.01;PaF106G0400015032.01
ko00100	Steroid biosynthesis	31	0.268498	0.743489	0.859833	0.881271	3940	PaF106G0600024138.01;PaF106G0500021068.01;PaF106G0500019433.01;PaF106G0800030710.01;PaF106G0300011036.01;PaF106G0700028566.01;PaF106G0300012108.01;PaF106G0100004900.01;PaF106G0800030951.01
ko04130	SNARE interactions in vesicular transport	41	-0.257398	-0.747945	0.860902	0.881271	4993	PaF106G0300012000.01;PaF106G0600025301.01;PaF106G0800031453.01;PaF106G0800029804.01;PaF106G0700029269.01;PaF106G0600025591.01;PaF106G0600025239.01;Prunus_sibirica_newGene_527
ko00010	Glycolysis / Gluconeogenesis	159	0.221927	0.811819	0.914062	0.92214	4325	PaF106G0800032665.01;PaF106G0200010874.01;PaF106G0600024645.01;PaF106G0600024842.01;PaF106G0500021374.01;PaF106G0400017850.01;PaF106G0600024076.01;PaF106G0600022018.01;PaF106G0700027740.01;PaF106G0400018283.01;PaF106G0600024649.01;PaF106G0100005597.01;PaF106G0800032531.01;PaF106G0600024089.01;PaF106G0500019619.01;PaF106G0700026545.01;PaF106G0100001425.01;PaF106G0400015149.01;PaF106G0100002580.01;…
ko00604	Glycosphingolipid biosynthesis - ganglio series	24	-0.242639	-0.643146	0.925573	0.92214	5551	Prunus_sibirica_newGene_1870;PaF106G0200009707.01;PaF106G0100001868.01;Prunus_sibirica_newGene_2394;PaF106G0300014061.01;PaF106G0100004032.01;PaF106G0100004394.01;Prunus_sibirica_newGene_1844;PaF106G0200009704.01
ko00790	Folate biosynthesis	28	-0.245192	-0.660358	0.930368	0.92214	247	PaF106G0100004584.01;PaF106G0500019002.01
ko00650	Butanoate metabolism	28	-0.235412	-0.634016	0.943907	0.92214	4333	PaF106G0500021315.01;PaF106G0400017765.01;PaF106G0700027008.01;PaF106G0700028765.01;PaF106G0700028800.01;PaF106G0400016068.01
ko00310	Lysine degradation	44	-0.213844	-0.636327	0.97191	0.92214	4529	PaF106G0500020570.01;PaF106G0700026904.01;PaF106G0700028103.01;PaF106G0700027105.01;Prunus_sibirica_newGene_1413;PaF106G0400014752.01;PaF106G0100001419.01;PaF106G0800029964.01;PaF106G0100002637.01;PaF106G0700027166.01;PaF106G0400014746.01;PaF106G0100001206.01
ko00670	One carbon pool by folate	25	0.201388	0.531303	0.985507	0.92214	1896	PaF106G0800029454.01;PaF106G0100005850.01
ko04145	Phagosome	82	-0.178771	-0.596531	0.988743	0.92214	4269	PaF106G0100006249.01;PaF106G0600024713.01;PaF106G0500020260.01;PaF106G0300011392.01;PaF106G0200010493.01;PaF106G0100002381.01;PaF106G0800030763.01;PaF106G0100004379.01;PaF106G0300011411.01;PaF106G0700028845.01;PaF106G0700026433.01;PaF106G0500019684.01
ko00330	Arginine and proline metabolism	52	0.186255	0.572575	0.989474	0.92214	2861	PaF106G0100003565.01;PaF106G0800030656.01;PaF106G0800030655.01;PaF106G0300011725.01;PaF106G0400018092.01;PaF106G0200007018.01;PaF106G0800030658.01;PaF106G0700026772.01
ko00600	Sphingolipid metabolism	53	0.16654	0.516089	0.995807	0.92214	2852	PaF106G0700026639.01;PaF106G0600024982.01;PaF106G0800030624.01;PaF106G0800032895.01;PaF106G0100004156.01;PaF106G0500020190.01;PaF106G0400018118.01;PaF106G0200007225.01
ko03015	mRNA surveillance pathway	122	-0.169243	-0.602058	0.998039	0.92214	6844	PaF106G0700026336.01;PaF106G0600025797.01;PaF106G0100005401.01;PaF106G0300013965.01;PaF106G0300012074.01;PaF106G0800029640.01;PaF106G0400015170.01;PaF106G0200010478.01;PaF106G0100004165.01;PaF106G0100005906.01;PaF106G0600022346.01;PaF106G0300011183.01;PaF106G0400015128.01;PaF106G0500021192.01;PaF106G0100006653.01;PaF106G0500019532.01;PaF106G0100004907.01;PaF106G0100006502.01;PaF106G0200007211.01;…
ko00190	Oxidative phosphorylation	111	0.140011	0.488252	1	0.92214	5591	PaF106G0700029104.01;PaF106G0300013527.01;PaF106G0100004938.01;PaF106G0300014017.01;PaF106G0500019074.01;PaF106G0200009356.01;PaF106G0600025069.01;PaF106G0700026049.01;PaF106G0200009355.01;PaF106G0100005346.01;PaF106G0100006375.01;PaF106G0100005473.01;PaF106G0100001176.01;PaF106G0400015530.01;PaF106G0100000669.01;PaF106G0200007306.01;PaF106G0100004864.01;PaF106G0700027273.01;PaF106G0600024100.01;…
ko03018	RNA degradation	135	0.142622	0.510968	1	0.92214	5038	Prunus_sibirica_newGene_1207;PaF106G0300012058.01;PaF106G0100006543.01;PaF106G0600022109.01;PaF106G0400016962.01;PaF106G0300012207.01;PaF106G0700026545.01;PaF106G0100002580.01;PaF106G0700027681.01;PaF106G0500021070.01;PaF106G0100006052.01;Prunus_sibirica_newGene_35;PaF106G0800030109.01;PaF106G0200009334.01;PaF106G0800032331.01;PaF106G0100005965.01;PaF106G0300013728.01;PaF106G0700028007.01;PaF106G…
