# Supplementary material for: Mining for genes related to pistil abortion in Prunus sibirica L
Source: PeerJ. 2022 Nov 15;10:e14366. doi: 10.7717/peerj.14366 (PMC9673769; doi:10.7717/peerj.14366)
Supplement: Table S13 [file peerj-10-14366-s013.xls]

## Sheet: Sheet1
Table S13 Differentially expressed transcription factor genes
#ID	gene_name	APt1_FPKM	APt1_count	APt2_FPKM	APt2_count	APt3_FPKM	APt3_count	NPt1_FPKM	NPt1_count	NPt2_FPKM	NPt2_count	NPt3_FPKM	NPt3_count	NPt1_NPt2_NPt3_vs_APt1_APt2_APt3_DESeq2_FDR	NPt1_NPt2_NPt3_vs_APt1_APt2_APt3_DESeq2_log2FC	NPt1_NPt2_NPt3_vs_APt1_APt2_APt3_DESeq2_(FDR_0.01_FC_2)_regulated	NPt1_NPt2_NPt3_vs_APt1_APt2_APt3_DESeq2_(FDR_0.05_FC_2)_regulated	NPt1_NPt2_NPt3_vs_APt1_APt2_APt3_DESeq2_(FDR_0.05_FC_1.5)_regulated	NPt1_NPt2_NPt3_vs_APt1_APt2_APt3_DESeq2_(FDR_0.05_FC_1)_regulated	NPt1_NPt2_NPt3_vs_APt1_APt2_APt3_DESeq2_Pvalue	NPt1_NPt2_NPt3_vs_APt1_APt2_APt3_DESeq2_(Pvalue_0.05_FC_2)_regulated	NPt1_NPt2_NPt3_vs_APt3_APt2_APt1_DESeq2_FDR	NPt1_NPt2_NPt3_vs_APt3_APt2_APt1_DESeq2_log2FC	NPt1_NPt2_NPt3_vs_APt3_APt2_APt1_DESeq2_(FDR_0.05_FC_2)_regulated	COG_class	COG_class_annotation	GO_annotation	KEGG_annotation	KEGG_pathway_annotation	KOG_class	KOG_class_annotation	Pfam_annotation	Swiss_Prot_annotation	eggNOG_class	eggNOG_class_annotation	NR_annotation	GO_second_level_annotation
PaF106G0700028785.01	PaF106G0700028785.01	0.172554	7	0.292812	11	0.235754	10	3.49063	148	2.61768	93	2.27862	94	2.75687e-16	-2.60435	down	down	down	down	1.34762e-17	down	2.75687e-16	-2.60435	down	--	--	Molecular Function: nucleic acid binding (GO:0003676);; Molecular Function: RNA-directed DNA polymerase activity (GO:0003964);; Molecular Function: zinc ion binding (GO:0008270);;	K09338|1.6e-32|pda:103715075|K09338 homeobox-leucine zipper protein | (RefSeq) homeobox-leucine zipper protein ROC5-like	--	--	--	gag-polypeptide of LTR copia-type	--	L	Replication, recombination and repair	putative RNA-directed DNA polymerase [Rosa chinensis]	molecular function: binding (GO:0005488);; biological process: metabolic process (GO:0008152);; biological process: cellular process (GO:0009987);; molecular function: catalytic activity (GO:0003824)
PaF106G0800031731.01	PaF106G0800031731.01	2.09197	118	2.4499	129	1.30788	81	1.26643	78	0.756069	39	0.484512	29	0.00257371	1.00956	up	up	up	up	0.000785608	up	0.00257371	1.00956	up	[HR]	Coenzyme transport and metabolism;; General function prediction only	Biological Process: sucrose metabolic process (GO:0005985);; Molecular Function: sucrose synthase activity (GO:0016157);; Molecular Function: sucrose-phosphate synthase activity (GO:0046524);;	K00696|4.2e-55|pavi:110746034|K00696 sucrose-phosphate synthase [EC:2.4.1.14] | (RefSeq) probable sucrose-phosphate synthase 2	Starch and sucrose metabolism (ko00500)	[M]	Cell wall/membrane/envelope biogenesis	--	Probable sucrose-phosphate synthase 1 OS=Oryza sativa subsp. indica OX=39946 GN=SPS1 PE=2 SV=2	M	Cell wall/membrane/envelope biogenesis	unnamed protein product [Prunus armeniaca]	biological process: metabolic process (GO:0008152);; biological process: cellular process (GO:0009987);; biological process: single-organism process (GO:0044699);; molecular function: catalytic activity (GO:0003824)
PaF106G0800030499.01	PaF106G0800030499.01	4.34814	474	5.17372	523	4.99866	583	2.36599	286	2.22132	225	1.55427	181	1.35346e-12	1.21245	up	up	up	up	9.00033e-14	up	1.35346e-12	1.21245	up	[R]	General function prediction only	Biological Process: signal transduction (GO:0007165);; Molecular Function: ADP binding (GO:0043531);;	K00695|6.8e-108|mtr:MTR_6g478030|K00695 sucrose synthase [EC:2.4.1.13] | (RefSeq) sucrose synthase	Starch and sucrose metabolism (ko00500)	--	--	TIR domain	TMV resistance protein N OS=Nicotiana glutinosa OX=35889 GN=N PE=1 SV=1	G	Carbohydrate transport and metabolism	PREDICTED: TMV resistance protein N-like [Prunus mume]	biological process: cellular process (GO:0009987);; biological process: biological regulation (GO:0065007);; molecular function: binding (GO:0005488)
PaF106G0200006790.01	PaF106G0200006790.01	0.392375	87	0.241651	50	0.283214	68	3.54582	811	4.67375	896	3.38125	750	1.75637e-65	-3.24814	down	down	down	down	1.0404e-67	down	1.75637e-65	-3.24814	down	--	--	Molecular Function: motor activity (GO:0003774);; Molecular Function: actin binding (GO:0003779);; Molecular Function: ATP binding (GO:0005524);; Biological Process: actin filament organization (GO:0007015);; Cellular Component: myosin complex (GO:0016459);;	K10357|0.0e+00|pavi:110760740|K10357 myosin V | (RefSeq) myosin-12	--	[Z]	Cytoskeleton	Myosin head (motor domain)	Myosin-12 OS=Arabidopsis thaliana OX=3702 GN=XI-F PE=2 SV=1	Z	Cytoskeleton	unnamed protein product, partial [Prunus armeniaca]	molecular function: catalytic activity (GO:0003824);; molecular function: binding (GO:0005488);; biological process: cellular process (GO:0009987);; biological process: single-organism process (GO:0044699);; biological process: cellular component organization or biogenesis (GO:0071840);; cellular component: cell (GO:0005623);; cellular component: macromolecular complex (GO:0032991);; cellular com…
PaF106G0700027940.01	PaF106G0700027940.01	6.95184	430	5.98252	345	6.51149	438	28.7575	1935	24.9152	1401	29.2101	1906	1.01944e-60	-1.96309	down	down	down	down	6.98392e-63	down	1.01944e-60	-1.96309	down	[R]	General function prediction only	Cellular Component: endoplasmic reticulum (GO:0005783);; Biological Process: auxin metabolic process (GO:0009850);; Molecular Function: IAA-Ala conjugate hydrolase activity (GO:0010179);; Molecular Function: hydrolase activity (GO:0016787);;	K14664|3.0e-249|pmum:103341724|K14664 IAA-amino acid hydrolase [EC:3.5.1.-] | (RefSeq) IAA-amino acid hydrolase ILR1-like 3	--	--	--	Peptidase family M20/M25/M40	IAA-amino acid hydrolase ILR1-like 3 OS=Oryza sativa subsp. japonica OX=39947 GN=ILL3 PE=2 SV=1	S	Function unknown	unnamed protein product [Prunus armeniaca]	cellular component: cell (GO:0005623);; cellular component: organelle (GO:0043226);; cellular component: cell part (GO:0044464);; biological process: metabolic process (GO:0008152);; biological process: cellular process (GO:0009987);; biological process: biological regulation (GO:0065007);; molecular function: catalytic activity (GO:0003824)
PaF106G0200010085.01	PaF106G0200010085.01	13.5825	626	13.1641	565	12.2319	612	5.76758	289	6.45266	271	6.98774	340	1.39267e-12	1.04925	up	up	up	up	9.26819e-14	up	1.39267e-12	1.04925	up	--	--	Molecular Function: peroxidase activity (GO:0004601);; Cellular Component: extracellular region (GO:0005576);; Biological Process: response to oxidative stress (GO:0006979);; Molecular Function: heme binding (GO:0020037);; Biological Process: hydrogen peroxide catabolic process (GO:0042744);; Molecular Function: metal ion binding (GO:0046872);;	K00430|2.0e-175|pper:18785759|K00430 peroxidase [EC:1.11.1.7] | (RefSeq) peroxidase P7	Phenylpropanoid biosynthesis (ko00940)	--	--	Peroxidase	Peroxidase 52 OS=Arabidopsis thaliana OX=3702 GN=PER52 PE=2 SV=1	Q	Secondary metabolites biosynthesis, transport and catabolism	unnamed protein product [Prunus armeniaca]	biological process: metabolic process (GO:0008152);; biological process: cellular process (GO:0009987);; biological process: single-organism process (GO:0044699);; biological process: response to stimulus (GO:0050896);; biological process: detoxification (GO:0098754);; molecular function: catalytic activity (GO:0003824);; molecular function: antioxidant activity (GO:0016209);; cellular component:…
PaF106G0100005920.01	PaF106G0100005920.01	49.3355	3673	60.3524	4136	49.29	3993	22.0363	1853	27.939	1851	23.9216	1896	1.98897e-26	1.14011	up	up	up	up	5.17373e-28	up	1.98897e-26	1.14011	up	--	--	Molecular Function: protein binding (GO:0005515);;	K12880|8.9e-07|nau:109212797|K12880 THO complex subunit 3 | (RefSeq) THO complex subunit 3	RNA transport (ko03013);; Spliceosome (ko03040)	--	--	Anaphase-promoting complex subunit 4 WD40 domain	--	S	Function unknown	uncharacterized WD repeat-containing protein C2A9.03-like isoform X4 [Prunus avium]	molecular function: binding (GO:0005488)
PaF106G0600022158.01	PaF106G0600022158.01	1.31554	96	1.45583	99	2.32136	184	7.76236	614	5.99883	397	6.098	468	1.56174e-17	-1.73675	down	down	down	down	6.95208e-19	down	1.56174e-17	-1.73675	down	[G]	Carbohydrate transport and metabolism	Molecular Function: UDP-glycosyltransferase activity (GO:0008194);; Cellular Component: intracellular membrane-bounded organelle (GO:0043231);; Molecular Function: quercetin 3-O-glucosyltransferase activity (GO:0080043);; Molecular Function: quercetin 7-O-glucosyltransferase activity (GO:0080044);;	K13493|5.4e-110|brp:103846928|K13493 cytokinin-N-glucosyltransferase [EC:2.4.1.-] | (RefSeq) UDP-glycosyltransferase 76C2	Zeatin biosynthesis (ko00908)	[GC]	Carbohydrate transport and metabolism;; Energy production and conversion	UDP-glucoronosyl and UDP-glucosyl transferase	UDP-glucose iridoid glucosyltransferase OS=Catharanthus roseus OX=4058 GN=UGT76A2 PE=1 SV=1	--	--	PREDICTED: UDP-glycosyltransferase 76E2-like isoform X1 [Prunus mume]	molecular function: catalytic activity (GO:0003824);; cellular component: cell (GO:0005623);; cellular component: organelle (GO:0043226);; cellular component: cell part (GO:0044464)
PaF106G0100004447.01	PaF106G0100004447.01	13.6981	711	20.128	974	19.8417	1121	7.63603	433	7.73347	366	8.51691	469	1.76901e-14	1.17725	up	up	up	up	1.00688e-15	up	1.76901e-14	1.17725	up	[I]	Lipid transport and metabolism	Molecular Function: S-adenosylmethionine-dependent methyltransferase activity (GO:0008757);; Biological Process: methylation (GO:0032259);;	K08241|2.5e-209|pmum:103320875|K08241 jasmonate O-methyltransferase [EC:2.1.1.141] | (RefSeq) jasmonate O-methyltransferase-like	alpha-Linolenic acid metabolism (ko00592)	--	--	SAM dependent carboxyl methyltransferase	Jasmonate O-methyltransferase OS=Brassica rapa subsp. pekinensis OX=51351 GN=JMT PE=1 SV=1	S	Function unknown	PREDICTED: jasmonate O-methyltransferase-like [Prunus mume]	biological process: metabolic process (GO:0008152);; molecular function: catalytic activity (GO:0003824)
PaF106G0100000524.01	PaF106G0100000524.01	12.9022	1584	11.06	1266	10.1713	1358	4.90501	656	5.35091	598	5.13134	665	1.47694e-20	1.18882	up	up	up	up	5.46227e-22	up	1.47694e-20	1.18882	up	--	--	Molecular Function: inositol hexakisphosphate binding (GO:0000822);; Cellular Component: cytoplasm (GO:0005737);; Cellular Component: Golgi apparatus (GO:0005794);; Cellular Component: trans-Golgi network (GO:0005802);; Cellular Component: plasma membrane (GO:0005886);; Biological Process: polyphosphate biosynthetic process (GO:0006799);; Biological Process: phosphate ion transport (GO:0006817);;…	K24195|0.0e+00|pmum:103324066|K24195 xenotropic and polytropic retrovirus receptor 1 | (RefSeq) phosphate transporter PHO1	--	[U]	Intracellular trafficking, secretion, and vesicular transport	EXS family	Phosphate transporter PHO1 OS=Arabidopsis thaliana OX=3702 GN=PHO1 PE=1 SV=1	U	Intracellular trafficking, secretion, and vesicular transport	PREDICTED: phosphate transporter PHO1 [Prunus mume]	molecular function: binding (GO:0005488);; cellular component: cell (GO:0005623);; cellular component: cell part (GO:0044464);; cellular component: organelle (GO:0043226);; cellular component: organelle part (GO:0044422);; cellular component: membrane (GO:0016020);; biological process: metabolic process (GO:0008152);; biological process: cellular process (GO:0009987);; biological process: single-…
PaF106G0400015323.01	PaF106G0400015323.01	14.7434	756	19.359	932	18.2903	1043	9.05021	477	8.58527	379	8.19663	428	3.80777e-18	1.14051	up	up	up	up	1.63381e-19	up	3.80777e-18	1.14051	up	--	--	Biological Process: signal transduction (GO:0007165);; Molecular Function: NADH pyrophosphatase activity (GO:0035529);; Molecular Function: ADP-ribose diphosphatase activity (GO:0047631);; Molecular Function: NAD binding (GO:0051287);;	--	--	[T]	Signal transduction mechanisms	Nudix hydrolase domain	Nudix hydrolase 10 OS=Arabidopsis thaliana OX=3702 GN=NUDT10 PE=1 SV=1	T	Signal transduction mechanisms	PREDICTED: nudix hydrolase 10-like isoform X1 [Prunus mume]	biological process: cellular process (GO:0009987);; biological process: biological regulation (GO:0065007);; molecular function: catalytic activity (GO:0003824);; molecular function: binding (GO:0005488)
PaF106G0400015505.01	PaF106G0400015505.01	0.323226	43	0.684746	85	0.559985	81	0.086656	13	0.07703	10	0.035748	5	1.8957e-08	2.0033	up	up	up	up	2.09744e-09	up	1.8957e-08	2.0033	up	--	--	Molecular Function: protein binding (GO:0005515);;	K13466|9.7e-35|cit:102616085|K13466 EIX receptor 1/2 | (RefSeq) receptor-like protein EIX1	Plant-pathogen interaction (ko04626)	[R]	General function prediction only	Leucine rich repeat	Receptor-like protein 6 OS=Arabidopsis thaliana OX=3702 GN=RLP6 PE=3 SV=1	V	Defense mechanisms	PREDICTED: receptor-like protein 12 [Prunus mume]	molecular function: binding (GO:0005488)
PaF106G0200008647.01	PaF106G0200008647.01	3.46731	158	4.03094	171	2.52825	126	1.5724	79	0.961194	41	0.977512	47	1.93359e-06	1.32906	up	up	up	up	3.00785e-07	up	1.93359e-06	1.32906	up	--	--	Cellular Component: integral component of membrane (GO:0016021);; Molecular Function: transmembrane transporter activity (GO:0022857);;	K17500|1.9e-45|nta:107765414|K17500 integrin-linked kinase-associated serine/threonine phosphatase 2C [EC:3.1.3.16] | (RefSeq) WAT1-related protein At3g18200-like	--	--	--	EamA-like transporter family	WAT1-related protein At5g64700 OS=Arabidopsis thaliana OX=3702 GN=At5g64700 PE=2 SV=1	S	Function unknown	WAT1-related protein [Prunus yedoensis var. nudiflora]	cellular component: membrane (GO:0016020);; cellular component: membrane part (GO:0044425);; biological process: localization (GO:0051179);; molecular function: transporter activity (GO:0005215)
PaF106G0300012429.01	PaF106G0300012429.01	0.163721	17	0.26489	26	0.207068	23	1.26698	141	1.29486	121	1.66668	180	1.06481e-14	-2.18829	down	down	down	down	5.91807e-16	down	1.06481e-14	-2.18829	down	[M]	Cell wall/membrane/envelope biogenesis	Molecular Function: protein serine/threonine kinase activity (GO:0004674);; Molecular Function: calcium ion binding (GO:0005509);; Molecular Function: ATP binding (GO:0005524);; Cellular Component: plasma membrane (GO:0005886);; Biological Process: protein phosphorylation (GO:0006468);; Biological Process: cell surface receptor signaling pathway (GO:0007166);; Cellular Component: integral compone…	K23544|1.2e-129|brp:103842861|K23544 serine incorporator 1/3 | (RefSeq) serine incorporator 3	--	--	--	Protein kinase domain	Wall-associated receptor kinase-like 3 OS=Arabidopsis thaliana OX=3702 GN=WAKL3 PE=2 SV=2	T	Signal transduction mechanisms	PREDICTED: wall-associated receptor kinase-like 3 [Prunus mume]	biological process: metabolic process (GO:0008152);; biological process: cellular process (GO:0009987);; molecular function: catalytic activity (GO:0003824);; molecular function: binding (GO:0005488);; cellular component: cell (GO:0005623);; cellular component: membrane (GO:0016020);; cellular component: cell part (GO:0044464);; biological process: signaling (GO:0023052);; biological process: sin…
Prunus_sibirica_newGene_1780	--	13.3123	1354	13.014	1242	9.3541	1048	4.77169	531	4.22343	400	3.59741	397	2.72053e-21	1.49222	up	up	up	up	9.71116e-23	up	2.72053e-21	1.49222	up	[V]	Defense mechanisms	Molecular Function: ATP binding (GO:0005524);; Cellular Component: plasma membrane (GO:0005886);; Cellular Component: integral component of membrane (GO:0016021);; Molecular Function: ATPase activity (GO:0016887);; Molecular Function: ATPase activity, coupled to transmembrane movement of substances (GO:0042626);; Biological Process: transmembrane transport (GO:0055085);;	K08712|1.1e-65|gsl:Gasu_29800|K08712 ATP-binding cassette, subfamily G (WHITE), member 2, SNQ2 | (RefSeq) ABC transporter, ATP-binding protein	ABC transporters (ko02010)	[Q]	Secondary metabolites biosynthesis, transport and catabolism	ABC transporter	Pleiotropic drug resistance protein 1 OS=Nicotiana tabacum OX=4097 GN=PDR1 PE=2 SV=1	Q	Secondary metabolites biosynthesis, transport and catabolism	PREDICTED: pleiotropic drug resistance protein 1-like [Prunus mume]	molecular function: binding (GO:0005488);; cellular component: cell (GO:0005623);; cellular component: membrane (GO:0016020);; cellular component: cell part (GO:0044464);; cellular component: membrane part (GO:0044425);; molecular function: catalytic activity (GO:0003824);; biological process: localization (GO:0051179);; molecular function: transporter activity (GO:0005215)
PaF106G0400018019.01	PaF106G0400018019.01	9.16102	809	10.1565	837	10.4806	1006	0.107569	11	0.154225	13	0.081778	9	3.31507e-149	5.66546	up	up	up	up	3.75665e-152	up	3.31507e-149	5.66546	up	--		Molecular Function: protein serine/threonine kinase activity (GO:0004674);; Molecular Function: ATP binding (GO:0005524);; Cellular Component: plasma membrane (GO:0005886);; Biological Process: protein phosphorylation (GO:0006468);; Cellular Component: integral component of membrane (GO:0016021);;	K24104|1.8e-85|thj:104799061|K24104 GPN-loop GTPase | (RefSeq) LOW QUALITY PROTEIN: uncharacterized protein LOC104799061	--	--	--	Protein kinase domain	Cysteine-rich receptor-like protein kinase 26 OS=Arabidopsis thaliana OX=3702 GN=CRK26 PE=2 SV=1	T	Signal transduction mechanisms	putative receptor-like protein kinase At4g00960 [Prunus persica]	biological process: metabolic process (GO:0008152);; biological process: cellular process (GO:0009987);; molecular function: catalytic activity (GO:0003824);; molecular function: binding (GO:0005488);; cellular component: cell (GO:0005623);; cellular component: membrane (GO:0016020);; cellular component: cell part (GO:0044464);; cellular component: membrane part (GO:0044425)
PaF106G0800031494.01	PaF106G0800031494.01	4.09764	484	5.58676	615	3.74088	480	18.6444	2395	8.46136	909	9.42759	1174	0.00216418	-1.04361	down	down	down	down	0.000647558	down	0.00216418	-1.04361	down	[M]	Cell wall/membrane/envelope biogenesis	Molecular Function: protein kinase activity (GO:0004672);; Molecular Function: ATP binding (GO:0005524);; Cellular Component: plasma membrane (GO:0005886);; Cellular Component: plasmodesma (GO:0009506);; Cellular Component: integral component of membrane (GO:0016021);; Biological Process: protein autophosphorylation (GO:0046777);;	K13435|8.0e-97|spen:107018783|K13435 serine/threonine-protein kinase Pto | (RefSeq) receptor-like protein kinase HERK 1 isoform X2	Plant-pathogen interaction (ko04626)	[T]	Signal transduction mechanisms	Protein tyrosine and serine/threonine kinase	Probable receptor-like protein kinase At2g21480 OS=Arabidopsis thaliana OX=3702 GN=At2g21480 PE=3 SV=1	T	Signal transduction mechanisms	PREDICTED: probable receptor-like protein kinase At2g21480 [Prunus mume]	biological process: metabolic process (GO:0008152);; biological process: cellular process (GO:0009987);; molecular function: catalytic activity (GO:0003824);; molecular function: binding (GO:0005488);; cellular component: cell (GO:0005623);; cellular component: membrane (GO:0016020);; cellular component: cell part (GO:0044464);; cellular component: cell junction (GO:0030054);; cellular component:…
PaF106G0600024672.01	PaF106G0600024672.01	42.031	3429	39.6167	3014	38.1327	3382	16.1383	1433	20.4423	1517	19.2531	1658	1.78498e-25	1.14973	up	up	up	up	5.00169e-27	up	1.78498e-25	1.14973	up	[E]	Amino acid transport and metabolism	Cellular Component: plasma membrane (GO:0005886);; Molecular Function: peptide:proton symporter activity (GO:0015333);; Cellular Component: integral component of membrane (GO:0016021);; Molecular Function: oligopeptide transmembrane transporter activity (GO:0035673);; Molecular Function: peptide transmembrane transporter activity (GO:1904680);;	K14638|1.5e-192|cpep:111803733|K14638 solute carrier family 15 (peptide/histidine transporter), member 3/4 | (RefSeq) protein NRT1/ PTR FAMILY 2.8-like	--	[E]	Amino acid transport and metabolism	POT family	Protein NRT1/ PTR FAMILY 2.8 OS=Arabidopsis thaliana OX=3702 GN=NPF2.8 PE=2 SV=2	E	Amino acid transport and metabolism	unnamed protein product [Prunus armeniaca]	cellular component: cell (GO:0005623);; cellular component: membrane (GO:0016020);; cellular component: cell part (GO:0044464);; biological process: single-organism process (GO:0044699);; biological process: localization (GO:0051179);; molecular function: transporter activity (GO:0005215);; cellular component: membrane part (GO:0044425)
PaF106G0200006850.01	PaF106G0200006850.01	0.961573	89	0.96043	83	1.03951	105	0.045784	5	0	0	0.13018	13	2.99192e-13	2.58823	up	up	up	up	1.88633e-14	up	2.99192e-13	2.58823	up	--	--	Molecular Function: oxidoreductase activity, acting on single donors with incorporation of molecular oxygen, incorporation of two atoms of oxygen (GO:0016702);; Biological Process: oxylipin biosynthetic process (GO:0031408);; Molecular Function: metal ion binding (GO:0046872);;	K00454|0.0e+00|pper:18784763|K00454 lipoxygenase [EC:1.13.11.12] | (RefSeq) linoleate 13S-lipoxygenase 2-1, chloroplastic	Linoleic acid metabolism (ko00591);; alpha-Linolenic acid metabolism (ko00592)	--	--	Lipoxygenase	Linoleate 13S-lipoxygenase 2-1, chloroplastic OS=Solanum tuberosum OX=4113 GN=LOX2.1 PE=1 SV=1	E	Amino acid transport and metabolism	linoleate 13S-lipoxygenase 2-1, chloroplastic-like [Prunus dulcis]	biological process: metabolic process (GO:0008152);; biological process: single-organism process (GO:0044699);; molecular function: catalytic activity (GO:0003824);; biological process: cellular process (GO:0009987);; molecular function: binding (GO:0005488)
PaF106G0400016043.01	PaF106G0400016043.01	136.396	5348	143.479	5245	134.324	5725	68.2799	2914	67.2653	2399	65.3438	2703	1.29055e-49	1.10646	up	up	up	up	1.29626e-51	up	1.29055e-49	1.10646	up	--	--	Molecular Function: electron carrier activity (GO:0009055);; Cellular Component: anchored component of plasma membrane (GO:0046658);;	--	--	--	--	Plastocyanin-like domain	Early nodulin-like protein 2 OS=Arabidopsis thaliana OX=3702 GN=At4g27520 PE=1 SV=1	S	Function unknown	PREDICTED: early nodulin-like protein 2 [Prunus mume]	molecular function: electron carrier activity (GO:0009055);; cellular component: cell (GO:0005623);; cellular component: membrane (GO:0016020);; cellular component: membrane part (GO:0044425);; cellular component: cell part (GO:0044464)
PaF106G0200007416.01	PaF106G0200007416.01	0.403187	38	1.09771	96	0.903871	92	2.26036	229	2.47172	209	1.57259	155	0.000209335	-1.09109	down	down	down	down	4.91474e-05	down	0.000209335	-1.09109	down	--		Molecular Function: protein kinase activity (GO:0004672);; Molecular Function: ATP binding (GO:0005524);; Cellular Component: integral component of membrane (GO:0016021);; Molecular Function: polysaccharide binding (GO:0030247);;	K13430|4.1e-48|dct:110098817|K13430 serine/threonine-protein kinase PBS1 [EC:2.7.11.1] | (RefSeq) probable serine/threonine-protein kinase PBL7	Plant-pathogen interaction (ko04626)	[T]	Signal transduction mechanisms	Protein kinase domain	Rust resistance kinase Lr10 OS=Triticum aestivum OX=4565 GN=LRK10 PE=2 SV=1	T	Signal transduction mechanisms	PREDICTED: rust resistance kinase Lr10-like [Prunus mume]	biological process: metabolic process (GO:0008152);; biological process: cellular process (GO:0009987);; molecular function: catalytic activity (GO:0003824);; molecular function: binding (GO:0005488);; cellular component: membrane (GO:0016020);; cellular component: membrane part (GO:0044425)
PaF106G0200010176.01	PaF106G0200010176.01	0.311023	12	0.303952	11	0.359049	15	3.23396	128	1.77746	59	1.24399	48	9.42273e-07	-1.74001	down	down	down	down	1.37762e-07	down	9.42273e-07	-1.74001	down	--	--	Cellular Component: Golgi membrane (GO:0000139);; Molecular Function: transferase activity, transferring glycosyl groups (GO:0016757);; Biological Process: cell wall organization (GO:0071555);;	K06672|1.0e-31|pmum:103330237|K06672 cohesin loading factor subunit SCC2 | (RefSeq) nipped-B-like protein B	--	--	--	Nucleotide-diphospho-sugar transferase	Sister chromatid cohesion protein SCC2 OS=Arabidopsis thaliana OX=3702 GN=SCC2 PE=1 SV=1	S	Function unknown	uncharacterized protein At1g28695 [Prunus persica]	cellular component: cell (GO:0005623);; cellular component: membrane (GO:0016020);; cellular component: organelle (GO:0043226);; cellular component: organelle part (GO:0044422);; cellular component: cell part (GO:0044464);; molecular function: catalytic activity (GO:0003824);; biological process: cellular process (GO:0009987);; biological process: cellular component organization or biogenesis (GO…
PaF106G0800030480.01	PaF106G0800030480.01	19.7308	1404	22.8066	1513	18.0311	1395	6.88652	534	6.29067	408	5.96789	449	2.82207e-41	1.68285	up	up	up	up	3.77943e-43	up	2.82207e-41	1.68285	up	--	--	Cellular Component: integral component of membrane (GO:0016021);;	--	--	[O]	Posttranslational modification, protein turnover, chaperones	--	Chaperone protein dnaJ 10 OS=Arabidopsis thaliana OX=3702 GN=ATJ10 PE=2 SV=2	O	Posttranslational modification, protein turnover, chaperones	hypothetical protein Prudu_022499 [Prunus dulcis]	cellular component: membrane (GO:0016020);; cellular component: membrane part (GO:0044425)
PaF106G0100006218.01	PaF106G0100006218.01	1.25765	148	1.53876	168	1.15066	147	0.225773	29	0.024955	3	0.05383	7	2.65607e-14	2.59428	up	up	up	up	1.53777e-15	up	2.65607e-14	2.59428	up	--	--	Molecular Function: protein binding (GO:0005515);; Biological Process: biological_process (GO:0008150);; Biological Process: tissue development (GO:0009888);; Biological Process: meristem maintenance (GO:0010073);; Biological Process: multicellular organismal process (GO:0032501);; Biological Process: developmental process (GO:0032502);; Biological Process: meristem development (GO:0048507);; Bio…	--	--	--	--	Leucine rich repeat	--	S	Function unknown	unnamed protein product [Prunus armeniaca]	molecular function: binding (GO:0005488);; biological process: developmental process (GO:0032502);; biological process: multicellular organismal process (GO:0032501);; biological process: single-organism process (GO:0044699)
PaF106G0800032762.01	PaF106G0800032762.01	0.350001	49	0.352221	46	0.383224	59	0.065837	10	0	0	0.013528	2	1.28791e-07	2.01603	up	up	up	up	1.62797e-08	up	1.28791e-07	2.01603	up	[R]	General function prediction only	Molecular Function: ADP binding (GO:0043531);;	K15078|8.1e-133|tcc:18614561|K15078 structure-specific endonuclease subunit SLX1 [EC:3.6.1.-] | (RefSeq) putative disease resistance protein RGA3	--	[T]	Signal transduction mechanisms	NB-ARC domain	Putative disease resistance protein RGA3 OS=Solanum bulbocastanum OX=147425 GN=RGA3 PE=2 SV=2	T	Signal transduction mechanisms	putative disease resistance protein RGA3 [Prunus persica]	molecular function: binding (GO:0005488)
PaF106G0200007276.01	PaF106G0200007276.01	0.054592	6	0.118246	11	0.359655	37	2.47137	255	1.39893	121	2.57466	257	2.00905e-14	-2.53722	down	down	down	down	1.14972e-15	down	2.00905e-14	-2.53722	down	--	--	Molecular Function: GTPase activity (GO:0003924);; Molecular Function: GTP binding (GO:0005525);; Cellular Component: cytoplasm (GO:0005737);; Molecular Function: microtubule binding (GO:0008017);; Cellular Component: membrane (GO:0016020);; Biological Process: organelle fission (GO:0048285);;	K17065|7.3e-42|ats:109745633|K17065 dynamin 1-like protein [EC:3.6.5.5] | (RefSeq) LOC109745633; dynamin-related protein 3A-like	--	[UR]	Intracellular trafficking, secretion, and vesicular transport;; General function prediction only	Dynamin central region	Dynamin-related protein 4C OS=Arabidopsis thaliana OX=3702 GN=DRP4C PE=2 SV=1	U	Intracellular trafficking, secretion, and vesicular transport	unnamed protein product [Prunus armeniaca]	molecular function: catalytic activity (GO:0003824);; molecular function: binding (GO:0005488);; cellular component: cell (GO:0005623);; cellular component: cell part (GO:0044464);; cellular component: membrane (GO:0016020);; biological process: cellular process (GO:0009987);; biological process: cellular component organization or biogenesis (GO:0071840)
PaF106G0300011602.01	PaF106G0300011602.01	1.42443	97	1.47648	94	1.33783	99	0.097687	8	0.058899	4	0.054219	4	2.37017e-20	3.02421	up	up	up	up	8.85122e-22	up	2.37017e-20	3.02421	up	--	--	Molecular Function: transferase activity, transferring acyl groups other than amino-acyl groups (GO:0016747);;	K13264|8.0e-110|gmx:100127365|K13264 isoflavone 7-O-glucoside-6''-O-malonyltransferase [EC:2.3.1.115] | (RefSeq) AT133; malonyl-CoA:isoflavone 7-O-glucoside-6''-O-malonyltransferase	Isoflavonoid biosynthesis (ko00943);; Flavone and flavonol biosynthesis (ko00944)	--	--	Transferase family	Phenolic glucoside malonyltransferase 1 OS=Arabidopsis thaliana OX=3702 GN=PMAT1 PE=1 SV=1	S	Function unknown	unnamed protein product [Prunus armeniaca]	molecular function: catalytic activity (GO:0003824)
PaF106G0600025015.01	PaF106G0600025015.01	15.422	368	16.2905	363	19.049	494	6.52429	170	6.80281	148	9.20745	232	5.55108e-10	1.15734	up	up	up	up	4.98665e-11	up	5.55108e-10	1.15734	up	--	--	Biological Process: lipid transport (GO:0006869);; Molecular Function: lipid binding (GO:0008289);;	--	--	--	--	Protease inhibitor/seed storage/LTP family	Non-specific lipid-transfer protein 1 OS=Prunus dulcis OX=3755 PE=3 SV=1	T	Signal transduction mechanisms	unnamed protein product [Prunus armeniaca]	biological process: single-organism process (GO:0044699);; biological process: localization (GO:0051179);; molecular function: binding (GO:0005488)
PaF106G0700029062.01	PaF106G0700029062.01	1.49954	98	1.56599	96	1.44693	103	0.466366	34	0.489827	30	0.620208	43	3.79226e-06	1.31418	up	up	up	up	6.2156e-07	up	3.79226e-06	1.31418	up	--	--	Molecular Function: DNA binding (GO:0003677);; Molecular Function: transcription factor activity, sequence-specific DNA binding (GO:0003700);; Cellular Component: nucleus (GO:0005634);;	K16222|4.3e-33|dct:110107877|K16222 Dof zinc finger protein DOF5.5 | (RefSeq) cyclic dof factor 1 isoform X1	Circadian rhythm - plant (ko04712)	--	--	Dof domain, zinc finger	Cyclic dof factor 2 OS=Arabidopsis thaliana OX=3702 GN=CDF2 PE=1 SV=2	K	Transcription	unnamed protein product [Prunus armeniaca]	molecular function: binding (GO:0005488);; biological process: biological regulation (GO:0065007);; molecular function: nucleic acid binding transcription factor activity (GO:0001071);; cellular component: cell (GO:0005623);; cellular component: organelle (GO:0043226);; cellular component: cell part (GO:0044464)
PaF106G0700026042.01	PaF106G0700026042.01	7.64581	769	7.36401	673	7.05926	770	24.1842	2645	21.1075	1932	23.4892	2509	1.8546e-50	-1.55099	down	down	down	down	1.8055e-52	down	1.8546e-50	-1.55099	down	[T]	Signal transduction mechanisms	Molecular Function: protein serine/threonine kinase activity (GO:0004674);; Molecular Function: ATP binding (GO:0005524);; Cellular Component: plasma membrane (GO:0005886);; Biological Process: carbohydrate metabolic process (GO:0005975);; Biological Process: protein phosphorylation (GO:0006468);; Molecular Function: chitin binding (GO:0008061);; Cellular Component: integral component of membrane…	K01183|1.9e-83|nsy:104241083|K01183 chitinase [EC:3.2.1.14] | (RefSeq) chitinase-3-like protein 2	Amino sugar and nucleotide sugar metabolism (ko00520)	--	--	Protein tyrosine and serine/threonine kinase	G-type lectin S-receptor-like serine/threonine-protein kinase At1g11330 OS=Arabidopsis thaliana OX=3702 GN=At1g11330 PE=1 SV=3	T	Signal transduction mechanisms	PREDICTED: cysteine-rich receptor-like protein kinase 5 isoform X1 [Prunus mume]	biological process: metabolic process (GO:0008152);; biological process: cellular process (GO:0009987);; molecular function: catalytic activity (GO:0003824);; molecular function: binding (GO:0005488);; cellular component: cell (GO:0005623);; cellular component: membrane (GO:0016020);; cellular component: cell part (GO:0044464);; cellular component: membrane part (GO:0044425)
PaF106G0400017490.01	PaF106G0400017490.01	0.692348	97	1.03263	136	0.849515	133	0.172143	28	0.329505	44	0.168637	26	8.98218e-08	1.60144	up	up	up	up	1.10531e-08	up	8.98218e-08	1.60144	up	--		Molecular Function: protein serine/threonine kinase activity (GO:0004674);; Molecular Function: ATP binding (GO:0005524);; Cellular Component: plasma membrane (GO:0005886);; Cellular Component: integral component of membrane (GO:0016021);; Biological Process: protein autophosphorylation (GO:0046777);;	K13416|8.2e-67|bna:106376693|K13416 brassinosteroid insensitive 1-associated receptor kinase 1 [EC:2.7.10.1 2.7.11.1] | (RefSeq) BRASSINOSTEROID INSENSITIVE 1-associated receptor kinase 1-like isoform X1	MAPK signaling pathway - plant (ko04016);; Plant hormone signal transduction (ko04075);; Plant-pathogen interaction (ko04626)	--	--	Protein kinase domain	Probable LRR receptor-like serine/threonine-protein kinase At1g07650 OS=Arabidopsis thaliana OX=3702 GN=At1g07650 PE=1 SV=1	T	Signal transduction mechanisms	PREDICTED: probable leucine-rich repeat receptor-like serine/threonine-protein kinase At3g14840 [Prunus mume]	biological process: metabolic process (GO:0008152);; biological process: cellular process (GO:0009987);; molecular function: catalytic activity (GO:0003824);; molecular function: binding (GO:0005488);; cellular component: cell (GO:0005623);; cellular component: membrane (GO:0016020);; cellular component: cell part (GO:0044464);; cellular component: membrane part (GO:0044425)
PaF106G0600022843.01	PaF106G0600022843.01	0.230494	12	0.143438	7	0.356674	19	7.29839	384	5.84482	257	7.18698	367	1.35587e-53	-3.93023	down	down	down	down	1.20124e-55	down	1.35587e-53	-3.93023	down	--	--	Molecular Function: DNA binding (GO:0003677);; Molecular Function: protein dimerization activity (GO:0046983);;	--	--	--	--	SRF-type transcription factor (DNA-binding and dimerisation domain)	--	--	--	PREDICTED: uncharacterized protein LOC103326831 isoform X1 [Prunus mume]	molecular function: binding (GO:0005488)
PaF106G0100006463.01	PaF106G0100006463.01	3.92897	430	3.55713	365	4.55451	540	19.2134	2301	20.1922	2018	15.9639	1857	1.57645e-70	-2.07694	down	down	down	down	8.44499e-73	down	1.57645e-70	-2.07694	down	[G]	Carbohydrate transport and metabolism	Molecular Function: hydrolase activity, hydrolyzing O-glycosyl compounds (GO:0004553);; Molecular Function: xylan 1,4-beta-xylosidase activity (GO:0009044);; Cellular Component: plant-type cell wall (GO:0009505);; Biological Process: arabinan catabolic process (GO:0031222);; Biological Process: xylan catabolic process (GO:0045493);; Molecular Function: alpha-L-arabinofuranosidase activity (GO:004…	K15920|0.0e+00|pmum:103319154|K15920 xylan 1,4-beta-xylosidase [EC:3.2.1.37] | (RefSeq) beta-xylosidase/alpha-L-arabinofuranosidase 2	Amino sugar and nucleotide sugar metabolism (ko00520)	--	--	Glycosyl hydrolase family 3 C-terminal domain	Beta-xylosidase/alpha-L-arabinofuranosidase 2 OS=Medicago sativa subsp. varia OX=36902 GN=Xyl2 PE=2 SV=1	G	Carbohydrate transport and metabolism	unnamed protein product [Prunus armeniaca]	molecular function: catalytic activity (GO:0003824);; cellular component: cell (GO:0005623);; cellular component: cell part (GO:0044464);; biological process: metabolic process (GO:0008152);; biological process: single-organism process (GO:0044699);; biological process: cellular process (GO:0009987)
PaF106G0600023441.01	PaF106G0600023441.01	1.22463	137	1.4708	153	1.56901	191	4.84177	588	3.54713	360	2.97519	351	4.87191e-10	-1.23979	down	down	down	down	4.34642e-11	down	4.87191e-10	-1.23979	down	--		Molecular Function: protein serine/threonine kinase activity (GO:0004674);; Molecular Function: ATP binding (GO:0005524);; Cellular Component: integral component of membrane (GO:0016021);;	K13420|4.1e-68|mesc:110601988|K13420 LRR receptor-like serine/threonine-protein kinase FLS2 [EC:2.7.11.1] | (RefSeq) LRR receptor-like serine/threonine-protein kinase FLS2	MAPK signaling pathway - plant (ko04016);; Plant-pathogen interaction (ko04626)	--	--	Protein tyrosine and serine/threonine kinase	G-type lectin S-receptor-like serine/threonine-protein kinase LECRK3 OS=Oryza sativa subsp. indica OX=39946 GN=LECRK3 PE=3 SV=2	T	Signal transduction mechanisms	unnamed protein product [Prunus armeniaca]	biological process: metabolic process (GO:0008152);; biological process: cellular process (GO:0009987);; molecular function: catalytic activity (GO:0003824);; molecular function: binding (GO:0005488);; cellular component: membrane (GO:0016020);; cellular component: membrane part (GO:0044425)
PaF106G0700028401.01	PaF106G0700028401.01	1.45213	57	2.02371	74	1.48477	64	0.15383	7	0.235393	9	0.097068	5	1.6059e-10	2.23477	up	up	up	up	1.34914e-11	up	1.6059e-10	2.23477	up	--	--	Biological Process: defense response (GO:0006952);; Molecular Function: ADP binding (GO:0043531);;	--	--	--	--	NB-ARC domain	Disease resistance protein RGA2 OS=Solanum bulbocastanum OX=147425 GN=RGA2 PE=1 SV=1	T	Signal transduction mechanisms	unnamed protein product [Prunus armeniaca]	biological process: response to stimulus (GO:0050896);; molecular function: binding (GO:0005488)
PaF106G0300012916.01	PaF106G0300012916.01	0.212685	12	0.569978	30	0.343552	21	1.8031	110	1.09399	56	1.28212	76	0.000119322	-1.33536	down	down	down	down	2.63917e-05	down	0.000119322	-1.33536	down	[Q]	Secondary metabolites biosynthesis, transport and catabolism	Molecular Function: hydrolase activity (GO:0016787);;	K08726|9.8e-24|sbi:8071538|K08726 soluble epoxide hydrolase / lipid-phosphate phosphatase [EC:3.3.2.10 3.1.3.76] | (RefSeq) uncharacterized protein LOC8071538	Arachidonic acid metabolism (ko00590);; Peroxisome (ko04146)	[I]	Lipid transport and metabolism	alpha/beta hydrolase fold	--	I	Lipid transport and metabolism	unnamed protein product [Prunus armeniaca]	molecular function: catalytic activity (GO:0003824)
PaF106G0100002800.01	PaF106G0100002800.01	1.79385	123	0.697324	45	1.27023	95	0.401699	30	0.259347	17	0.476706	35	0.000172445	1.30398	up	up	up	up	3.96958e-05	up	0.000172445	1.30398	up	[QV]	Secondary metabolites biosynthesis, transport and catabolism;; Defense mechanisms	Molecular Function: monooxygenase activity (GO:0004497);; Molecular Function: iron ion binding (GO:0005506);; Cellular Component: integral component of membrane (GO:0016021);; Molecular Function: oxidoreductase activity, acting on paired donors, with incorporation or reduction of molecular oxygen (GO:0016705);; Molecular Function: heme binding (GO:0020037);;	K23810|3.3e-172|vvi:100232891|K23810 (E)-8-carboxylinalool synthase [EC:1.14.14.-] | (RefSeq) GFH2; ripening-related P-450 enzyme-like	Monoterpenoid biosynthesis (ko00902)	[Q]	Secondary metabolites biosynthesis, transport and catabolism	Cytochrome P450	Geraniol 8-hydroxylase OS=Catharanthus roseus OX=4058 GN=CYP76B6 PE=1 SV=1	Q	Secondary metabolites biosynthesis, transport and catabolism	PREDICTED: geraniol 8-hydroxylase-like [Prunus mume]	biological process: metabolic process (GO:0008152);; biological process: single-organism process (GO:0044699);; molecular function: catalytic activity (GO:0003824);; molecular function: binding (GO:0005488);; cellular component: membrane (GO:0016020);; cellular component: membrane part (GO:0044425)
PaF106G0800029792.01	PaF106G0800029792.01	0.509985	35	0.587364	38	0.627022	45	1.69432	128	1.22931	78	1.43519	106	0.000123373	-1.09985	down	down	down	down	2.73971e-05	down	0.000123373	-1.09985	down	--	--	Cellular Component: integral component of membrane (GO:0016021);;	K17442|3.9e-35|rcu:8279214|K17442 zinc finger protein ZFPM2 | (RefSeq) uncharacterized protein LOC8279214 isoform X1	--	[U]	Intracellular trafficking, secretion, and vesicular transport	TB2/DP1, HVA22 family	HVA22-like protein a OS=Arabidopsis thaliana OX=3702 GN=HVA22A PE=2 SV=1	U	Intracellular trafficking, secretion, and vesicular transport	unnamed protein product [Prunus armeniaca]	cellular component: membrane (GO:0016020);; cellular component: membrane part (GO:0044425)
PaF106G0700027388.01	PaF106G0700027388.01	0.9023	81	0.989224	88	0.954412	99	0.314704	33	0.535718	47	0.221184	21	0.000360095	1.15793	up	up	up	up	8.90685e-05	up	0.000360095	1.15793	up	--	--	Molecular Function: DNA binding (GO:0003677);; Cellular Component: nucleus (GO:0005634);;	--	--	--	--	B3 DNA binding domain	B3 domain-containing transcription factor VRN1 OS=Arabidopsis thaliana OX=3702 GN=VRN1 PE=1 SV=1	--	--	B3 domain-containing protein Os03g0620500 isoform X1 [Prunus persica]	molecular function: binding (GO:0005488);; cellular component: cell (GO:0005623);; cellular component: organelle (GO:0043226);; cellular component: cell part (GO:0044464)
PaF106G0100006536.01	PaF106G0100006536.01	2.43022	158	2.39652	146	1.73087	131	0.752717	57	0.981835	62	1.09678	80	4.78299e-05	1.06577	up	up	up	up	9.75372e-06	up	4.78299e-05	1.06577	up	--	--	Cellular Component: integral component of membrane (GO:0016021);; Molecular Function: transmembrane transporter activity (GO:0022857);;	K17500|1.4e-36|nta:107765414|K17500 integrin-linked kinase-associated serine/threonine phosphatase 2C [EC:3.1.3.16] | (RefSeq) WAT1-related protein At3g18200-like	--	--	--	EamA-like transporter family	WAT1-related protein At5g64700 OS=Arabidopsis thaliana OX=3702 GN=At5g64700 PE=2 SV=1	S	Function unknown	WAT1-related protein At5g64700 isoform X2 [Prunus persica]	cellular component: membrane (GO:0016020);; cellular component: membrane part (GO:0044425);; biological process: localization (GO:0051179);; molecular function: transporter activity (GO:0005215)
PaF106G0100002765.01	PaF106G0100002765.01	9.12779	446	9.34339	425	9.93176	523	24.8949	1319	18.2805	808	18.8451	967	4.4993e-13	-1.01459	down	down	down	down	2.87609e-14	down	4.4993e-13	-1.01459	down	--	--	Molecular Function: molecular_function (GO:0003674);; Molecular Function: binding (GO:0005488);; Molecular Function: protein binding (GO:0005515);; Cellular Component: cellular_component (GO:0005575);; Cellular Component: intracellular (GO:0005622);; Cellular Component: cell (GO:0005623);; Cellular Component: cytoplasm (GO:0005737);; Biological Process: movement of cell or subcellular component (…	K23538|2.2e-134|pmum:103322063|K23538 ELMO domain-containing protein | (RefSeq) ELMO domain-containing protein A	--	[S]	Function unknown	ELMO/CED-12 family	--	S	Function unknown	PREDICTED: ELMO domain-containing protein A [Prunus mume]	molecular function: binding (GO:0005488);; cellular component: cell (GO:0005623);; cellular component: cell part (GO:0044464);; biological process: cellular process (GO:0009987);; biological process: single-organism process (GO:0044699);; biological process: biological regulation (GO:0065007);; biological process: cellular component organization or biogenesis (GO:0071840);; biological process: de…
PaF106G0800032313.01	PaF106G0800032313.01	0.356157	62	0.451235	73	0.433315	82	1.22324	229	1.46107	224	1.35	243	5.66846e-12	-1.46238	down	down	down	down	3.99718e-13	down	5.66846e-12	-1.46238	down	[R]	General function prediction only	Biological Process: signal transduction (GO:0007165);; Molecular Function: ADP binding (GO:0043531);;	K00695|7.8e-127|mtr:MTR_6g478030|K00695 sucrose synthase [EC:2.4.1.13] | (RefSeq) sucrose synthase	Starch and sucrose metabolism (ko00500)	--	--	TIR domain	Disease resistance protein Roq1 OS=Nicotiana benthamiana OX=4100 GN=ROQ1 PE=1 SV=1	S	Function unknown	PREDICTED: TMV resistance protein N-like [Prunus mume]	biological process: cellular process (GO:0009987);; biological process: biological regulation (GO:0065007);; molecular function: binding (GO:0005488)
PaF106G0800030463.01	PaF106G0800030463.01	6.8792	403	9.12929	455	8.9329	521	0	0	0.04116	3	0.055448	4	4.58966e-91	5.6667	up	up	up	up	1.63123e-93	up	4.58966e-91	5.6667	up	--	--	Biological Process: regulation of transcription from RNA polymerase II promoter (GO:0006357);; Molecular Function: cyclin-dependent protein serine/threonine kinase regulator activity (GO:0016538);; Cellular Component: host cell nucleus (GO:0042025);;	K06634|1.7e-57|pmum:103334781|K06634 cyclin H | (RefSeq) cyclin-H1-1-like	Basal transcription factors (ko03022);; Nucleotide excision repair (ko03420)	[DKL]	Cell cycle control, cell division, chromosome partitioning;; Transcription;; Replication, recombination and repair	Cyclin, N-terminal domain	Cyclin-H1-1 OS=Arabidopsis thaliana OX=3702 GN=CYCH1-1 PE=1 SV=1	--	--	hypothetical protein PRUPE_6G323600 [Prunus persica]	biological process: biological regulation (GO:0065007);; molecular function: molecular function regulator (GO:0098772);; cellular component: other organism (GO:0044215);; cellular component: other organism part (GO:0044217)
PaF106G0400016677.01	PaF106G0400016677.01	5.11552	834	6.01341	889	5.97461	1048	0.79657	143	0.551478	83	0.680674	117	6.04573e-88	2.97282	up	up	up	up	2.33558e-90	up	6.04573e-88	2.97282	up	[NW]	Cell motility;; Extracellular structures	Molecular Function: protein serine/threonine kinase activity (GO:0004674);; Molecular Function: ATP binding (GO:0005524);; Cellular Component: integral component of membrane (GO:0016021);; Molecular Function: carbohydrate binding (GO:0030246);;	K24104|5.3e-76|thj:104799061|K24104 GPN-loop GTPase | (RefSeq) LOW QUALITY PROTEIN: uncharacterized protein LOC104799061	--	--	--	Protein tyrosine and serine/threonine kinase	G-type lectin S-receptor-like serine/threonine-protein kinase At1g67520 OS=Arabidopsis thaliana OX=3702 GN=At1g67520 PE=2 SV=3	T	Signal transduction mechanisms	PREDICTED: G-type lectin S-receptor-like serine/threonine-protein kinase At1g67520 isoform X1 [Prunus mume]	biological process: metabolic process (GO:0008152);; biological process: cellular process (GO:0009987);; molecular function: catalytic activity (GO:0003824);; molecular function: binding (GO:0005488);; cellular component: membrane (GO:0016020);; cellular component: membrane part (GO:0044425)
PaF106G0200008308.01	PaF106G0200008308.01	0.357874	39	0.506556	52	0.551051	65	1.43577	170	1.34269	133	1.12372	129	3.3841e-06	-1.20762	down	down	down	down	5.47864e-07	down	3.3841e-06	-1.20762	down	--	--	Molecular Function: nucleic acid binding (GO:0003676);; Molecular Function: RNA-DNA hybrid ribonuclease activity (GO:0004523);;	--	--	[R]	General function prediction only	--	--	S	Function unknown	PREDICTED: putative ribonuclease H protein At1g65750 [Prunus mume]	molecular function: binding (GO:0005488);; biological process: metabolic process (GO:0008152);; biological process: cellular process (GO:0009987);; molecular function: catalytic activity (GO:0003824)
PaF106G0600024288.01	PaF106G0600024288.01	0.437752	31	0.213127	15	0.467994	36	1.23767	96	0.704946	46	1.18192	89	0.00252782	-1.05077	down	down	down	down	0.000769802	down	0.00252782	-1.05077	down	--	--	Cellular Component: integral component of membrane (GO:0016021);;	K01193|5.7e-26|ats:109747879|K01193 beta-fructofuranosidase [EC:3.2.1.26] | (RefSeq) LOC109747879; beta-fructofuranosidase, insoluble isoenzyme 3-like	Galactose metabolism (ko00052);; Starch and sucrose metabolism (ko00500)	--	--	Plant protein of unknown function	UPF0481 protein At3g47200 OS=Arabidopsis thaliana OX=3702 GN=At3g47200 PE=2 SV=1	S	Function unknown	PREDICTED: UPF0481 protein At3g47200 [Prunus mume]	cellular component: membrane (GO:0016020);; cellular component: membrane part (GO:0044425)
PaF106G0600024149.01	PaF106G0600024149.01	18.0386	496	18.4145	472	15.0661	450	10.0722	301	7.92837	198	7.87619	229	3.08998e-09	1.01242	up	up	up	up	3.06547e-10	up	3.08998e-09	1.01242	up	--	--	Molecular Function: transcription regulatory region sequence-specific DNA binding (GO:0000976);; Molecular Function: transcription factor activity, sequence-specific DNA binding (GO:0003700);; Cellular Component: nucleus (GO:0005634);; Molecular Function: sequence-specific DNA binding (GO:0043565);; Biological Process: positive regulation of transcription, DNA-templated (GO:0045893);;	--	--	--	--	bZIP transcription factor	Basic leucine zipper 4 OS=Arabidopsis thaliana OX=3702 GN=BZIP4 PE=1 SV=1	K	Transcription	unnamed protein product [Prunus armeniaca]	molecular function: binding (GO:0005488);; biological process: biological regulation (GO:0065007);; molecular function: nucleic acid binding transcription factor activity (GO:0001071);; cellular component: cell (GO:0005623);; cellular component: organelle (GO:0043226);; cellular component: cell part (GO:0044464)
PaF106G0100001892.01	PaF106G0100001892.01	15.5932	2618	15.5523	2430	16.9444	3093	6.16377	1111	6.159	920	5.10497	880	1.88838e-60	1.54232	up	up	up	up	1.31313e-62	up	1.88838e-60	1.54232	up	--	--	Biological Process: defense response (GO:0006952);; Molecular Function: ADP binding (GO:0043531);;	K15078|4.8e-107|tcc:18614561|K15078 structure-specific endonuclease subunit SLX1 [EC:3.6.1.-] | (RefSeq) putative disease resistance protein RGA3	--	[T]	Signal transduction mechanisms	NB-ARC domain	Putative disease resistance protein RGA3 OS=Solanum bulbocastanum OX=147425 GN=RGA3 PE=2 SV=2	T	Signal transduction mechanisms	PREDICTED: putative disease resistance [Prunus dulcis]	biological process: response to stimulus (GO:0050896);; molecular function: binding (GO:0005488)
PaF106G0600024883.01	PaF106G0600024883.01	0.983248	100	1.11481	124	1.1666	153	0.807296	27	0.679864	19	0.912535	30	1.32715e-12	1.99439	up	up	up	up	8.80482e-14	up	1.32715e-12	1.99439	up	--	--	Molecular Function: protein binding (GO:0005515);; Biological Process: biological_process (GO:0008150);; Biological Process: tissue development (GO:0009888);; Biological Process: meristem maintenance (GO:0010073);; Biological Process: multicellular organismal process (GO:0032501);; Biological Process: developmental process (GO:0032502);; Biological Process: meristem development (GO:0048507);; Bio…	K13466|2.1e-10|vvi:104882119|K13466 EIX receptor 1/2 | (RefSeq) receptor-like protein 12	Plant-pathogen interaction (ko04626)	[R]	General function prediction only	Leucine rich repeat	Receptor-like protein 49 OS=Arabidopsis thaliana OX=3702 GN=RLP49 PE=2 SV=2	T	Signal transduction mechanisms	unnamed protein product [Prunus armeniaca]	molecular function: binding (GO:0005488);; biological process: developmental process (GO:0032502);; biological process: multicellular organismal process (GO:0032501);; biological process: single-organism process (GO:0044699)
PaF106G0400014727.01	PaF106G0400014727.01	4.4942	242	3.68907	186	3.8294	225	1.34972	80	2.37813	117	1.11498	64	3.32122e-06	1.21105	up	up	up	up	5.37e-07	up	3.32122e-06	1.21105	up	--	--	--	K09580|3.1e-07|nnu:104605783|K09580 protein disulfide-isomerase A1 [EC:5.3.4.1] | (RefSeq) protein disulfide-isomerase	Protein processing in endoplasmic reticulum (ko04141)	--	--	--	--	--	--	hypothetical protein PRUPE_4G280900 [Prunus persica]	--
PaF106G0100006472.01	PaF106G0100006472.01	4.64231	899	5.11372	956	5.54497	1185	1.90653	406	2.27141	399	3.00487	434	5.31485e-28	1.33601	up	up	up	up	1.24015e-29	up	5.31485e-28	1.33601	up	--	--	Biological Process: signal transduction (GO:0007165);; Molecular Function: ADP binding (GO:0043531);;	K16225|1.9e-35|ath:AT5G45260|K16225 probable WRKY transcription factor 52 | (RefSeq) RRS1; Disease resistance protein (TIR-NBS-LRR class)	Plant-pathogen interaction (ko04626)	--	--	Leucine Rich repeats (2 copies)	TMV resistance protein N OS=Nicotiana glutinosa OX=35889 GN=N PE=1 SV=1	T	Signal transduction mechanisms	LOW QUALITY PROTEIN: disease resistance protein RPV1-like [Prunus dulcis]	biological process: cellular process (GO:0009987);; biological process: biological regulation (GO:0065007);; molecular function: binding (GO:0005488)
PaF106G0200010194.01	PaF106G0200010194.01	7.50525	773	6.98889	685	7.44486	851	14.9962	1653	17.1008	1644	15.5817	1761	3.16754e-22	-1.02918	down	down	down	down	1.06868e-23	down	3.16754e-22	-1.02918	down	--	--	--	--	--	--	--	Agenet domain	Protein AGENET DOMAIN (AGD)-CONTAINING P1 OS=Arabidopsis thaliana OX=3702 GN=AGDP1 PE=1 SV=1	S	Function unknown	unnamed protein product [Prunus armeniaca]	--
PaF106G0200007412.01	PaF106G0200007412.01	0.365409	22	0.238969	14	0.107078	7	1.18327	76	1.03801	56	1.09772	69	4.91662e-05	-1.45834	down	down	down	down	1.00541e-05	down	4.91662e-05	-1.45834	down	--	--	Molecular Function: nucleic acid binding (GO:0003676);; Molecular Function: zinc ion binding (GO:0008270);; Biological Process: DNA integration (GO:0015074);;	K12393|6.5e-60|aof:109845736|K12393 AP-1 complex subunit mu | (RefSeq) LOW QUALITY PROTEIN: AP-1 complex subunit mu-2-like	--	[R]	General function prediction only	gag-polypeptide of LTR copia-type	Retrovirus-related Pol polyprotein from transposon TNT 1-94 OS=Nicotiana tabacum OX=4097 PE=2 SV=1	T	Signal transduction mechanisms	hypothetical protein C1H46_017140 [Malus baccata]	molecular function: binding (GO:0005488);; biological process: metabolic process (GO:0008152);; biological process: cellular process (GO:0009987)
PaF106G0200007369.01	PaF106G0200007369.01	0.768153	183	0.822196	183	0.779936	202	2.62219	562	2.22248	420	1.87537	472	1.46558e-15	-1.20879	down	down	down	down	7.56421e-17	down	1.46558e-15	-1.20879	down	--	--	Molecular Function: ADP binding (GO:0043531);;	K12818|4.5e-59|mtr:MTR_0267s0070|K12818 ATP-dependent RNA helicase DHX8/PRP22 [EC:3.6.4.13] | (RefSeq) NB-ARC domain disease resistance protein, putative	Spliceosome (ko03040)	[T]	Signal transduction mechanisms	Leucine Rich repeats (2 copies)	Putative disease resistance protein At3g14460 OS=Arabidopsis thaliana OX=3702 GN=At3g14460 PE=3 SV=1	T	Signal transduction mechanisms	hypothetical protein PRUPE_2G046700 [Prunus persica]	molecular function: binding (GO:0005488)
PaF106G0100006479.01	PaF106G0100006479.01	0.533762	97	1.42956	102	1.28029	120	5.12743	332	10.3508	328	9.0442	286	3.33358e-13	-1.38719	down	down	down	down	2.11032e-14	down	3.33358e-13	-1.38719	down	[R]	General function prediction only	Biological Process: signal transduction (GO:0007165);; Molecular Function: ADP binding (GO:0043531);;	K00695|1.4e-135|mtr:MTR_6g478030|K00695 sucrose synthase [EC:2.4.1.13] | (RefSeq) sucrose synthase	Starch and sucrose metabolism (ko00500)	--	--	TIR domain	Disease resistance protein RPV1 OS=Vitis rotundifolia OX=103349 GN=RPV1 PE=1 SV=1	T	Signal transduction mechanisms	LOW QUALITY PROTEIN: disease resistance protein RPV1-like [Prunus dulcis]	biological process: cellular process (GO:0009987);; biological process: biological regulation (GO:0065007);; molecular function: binding (GO:0005488)
PaF106G0100004306.01	PaF106G0100004306.01	1.06767	122	1.28028	136	1.19065	147	0.18742	24	0.188269	20	0.262029	32	1.06517e-14	2.10891	up	up	up	up	5.92555e-16	up	1.06517e-14	2.10891	up	[O]	Posttranslational modification, protein turnover, chaperones	Molecular Function: serine-type endopeptidase activity (GO:0004252);;	K15333|6.7e-45|nsy:104224633|K15333 tRNA guanosine-2'-O-methyltransferase [EC:2.1.1.34] | (RefSeq) uncharacterized protein LOC104224633	--	--	--	Subtilase family	Subtilisin-like protease SBT3 OS=Solanum lycopersicum OX=4081 GN=sbt3 PE=1 SV=1	O	Posttranslational modification, protein turnover, chaperones	unnamed protein product [Prunus armeniaca]	biological process: metabolic process (GO:0008152);; molecular function: catalytic activity (GO:0003824)
PaF106G0700028365.01	PaF106G0700028365.01	1.29749	248	1.25732	224	1.32307	275	0.05392	12	0.019554	4	0.046874	10	4.25667e-51	4.04499	up	up	up	up	4.0782e-53	up	4.25667e-51	4.04499	up	--	--	Biological Process: signal transduction (GO:0007165);; Molecular Function: ADP binding (GO:0043531);;	K16225|1.9e-64|ath:AT5G45260|K16225 probable WRKY transcription factor 52 | (RefSeq) RRS1; Disease resistance protein (TIR-NBS-LRR class)	Plant-pathogen interaction (ko04626)	--	--	NB-ARC domain	Disease resistance protein Roq1 OS=Nicotiana benthamiana OX=4100 GN=ROQ1 PE=1 SV=1	S	Function unknown	PREDICTED: TMV resistance protein N-like [Prunus mume]	biological process: cellular process (GO:0009987);; biological process: biological regulation (GO:0065007);; molecular function: binding (GO:0005488)
PaF106G0100006344.01	PaF106G0100006344.01	0.64056	31	0.08712	5	1.05616	55	12.769	620	19.0461	726	8.88504	400	1.47611e-05	-1.68612	down	down	down	down	2.71439e-06	down	1.47611e-05	-1.68612	down	--	--	Molecular Function: transcription regulatory region sequence-specific DNA binding (GO:0000976);; Molecular Function: RNA polymerase II regulatory region sequence-specific DNA binding (GO:0000977);; Molecular Function: RNA polymerase II transcription factor activity, sequence-specific DNA binding (GO:0000981);; Cellular Component: nucleus (GO:0005634);; Molecular Function: transcription factor bin…	K09264|1.1e-57|pavi:110771220|K09264 MADS-box transcription factor, plant | (RefSeq) agamous-like MADS-box protein AGL11 isoform X1	--	[K]	Transcription	K-box region	Agamous-like MADS-box protein AGL11 OS=Vitis vinifera OX=29760 GN=AGL11 PE=2 SV=1	K	Transcription	agamous-like MADS-box protein AGL11 isoform X1 [Prunus persica]	molecular function: binding (GO:0005488);; biological process: biological regulation (GO:0065007);; molecular function: nucleic acid binding transcription factor activity (GO:0001071);; cellular component: cell (GO:0005623);; cellular component: organelle (GO:0043226);; cellular component: cell part (GO:0044464);; biological process: reproduction (GO:0000003);; biological process: reproductive pr…
PaF106G0100005263.01	PaF106G0100005263.01	0.300599	31	0.123817	12	0.200218	22	0.931897	103	0.798692	74	0.871245	93	3.62408e-06	-1.50913	down	down	down	down	5.91378e-07	down	3.62408e-06	-1.50913	down	--	--	Molecular Function: transmembrane receptor protein serine/threonine kinase activity (GO:0004675);; Molecular Function: ATP binding (GO:0005524);; Cellular Component: plasma membrane (GO:0005886);; Biological Process: protein phosphorylation (GO:0006468);; Cellular Component: integral component of membrane (GO:0016021);;	--	--	--	--	--	--	T	Signal transduction mechanisms	unnamed protein product [Prunus armeniaca]	biological process: metabolic process (GO:0008152);; biological process: cellular process (GO:0009987);; biological process: signaling (GO:0023052);; biological process: single-organism process (GO:0044699);; biological process: response to stimulus (GO:0050896);; biological process: biological regulation (GO:0065007);; molecular function: catalytic activity (GO:0003824);; molecular function: sig…
PaF106G0200007074.01	PaF106G0200007074.01	23.7251	1482	22.0966	1313	21.2432	1447	50.3911	3450	57.7249	3258	56.2161	3659	6.34e-34	-1.17997	down	down	down	down	1.12993e-35	down	6.34e-34	-1.17997	down	[E]	Amino acid transport and metabolism	Molecular Function: serine-type carboxypeptidase activity (GO:0004185);;	K16297|9.8e-186|pmum:103330716|K16297 serine carboxypeptidase-like clade II [EC:3.4.16.-] | (RefSeq) serine carboxypeptidase-like 40	--	[OE]	Posttranslational modification, protein turnover, chaperones;; Amino acid transport and metabolism	Serine carboxypeptidase	Serine carboxypeptidase-like 40 OS=Arabidopsis thaliana OX=3702 GN=SCPL40 PE=2 SV=2	O	Posttranslational modification, protein turnover, chaperones	PREDICTED: serine carboxypeptidase-like 40 [Prunus mume]	biological process: metabolic process (GO:0008152);; molecular function: catalytic activity (GO:0003824)
PaF106G0200010775.01	PaF106G0200010775.01	5.74608	331	11.1263	597	7.76585	486	3.86114	242	3.49367	183	2.47849	151	2.54057e-08	1.26353	up	up	up	up	2.85542e-09	up	2.54057e-08	1.26353	up	[Q]	Secondary metabolites biosynthesis, transport and catabolism	Molecular Function: metal ion binding (GO:0046872);; Molecular Function: dioxygenase activity (GO:0051213);;	K24028|4.5e-194|pavi:110749563|K24028 salicylic acid 3-hydroxylase [EC:1.14.11.-] | (RefSeq) protein DOWNY MILDEW RESISTANCE 6	--	[QR]	Secondary metabolites biosynthesis, transport and catabolism;; General function prediction only	2OG-Fe(II) oxygenase superfamily	Protein DOWNY MILDEW RESISTANCE 6 OS=Arabidopsis thaliana OX=3702 GN=DMR6 PE=1 SV=1	Q	Secondary metabolites biosynthesis, transport and catabolism	unnamed protein product [Prunus armeniaca]	molecular function: binding (GO:0005488);; biological process: metabolic process (GO:0008152);; biological process: single-organism process (GO:0044699);; molecular function: catalytic activity (GO:0003824)
PaF106G0100006242.01	PaF106G0100006242.01	0.590129	47	1.28944	96	0.760674	66	0.222419	20	0.334031	25	0.313814	27	0.000567994	1.20197	up	up	up	up	0.00014705	up	0.000567994	1.20197	up	[V]	Defense mechanisms	Molecular Function: antiporter activity (GO:0015297);; Cellular Component: integral component of membrane (GO:0016021);; Molecular Function: xenobiotic transporter activity (GO:0042910);;	K03327|1.3e-283|pmum:103319408|K03327 multidrug resistance protein, MATE family | (RefSeq) protein DETOXIFICATION 48	--	[R]	General function prediction only	MatE	Protein DETOXIFICATION 48 OS=Arabidopsis thaliana OX=3702 GN=DTX48 PE=2 SV=1	V	Defense mechanisms	unnamed protein product [Prunus armeniaca]	biological process: localization (GO:0051179);; molecular function: transporter activity (GO:0005215);; cellular component: membrane (GO:0016020);; cellular component: membrane part (GO:0044425)
PaF106G0700028369.01	PaF106G0700028369.01	8.53529	2307	8.2081	2068	9.62021	2810	0	0	0.01777	5	0	0	4.29382e-222	7.97302	up	up	up	up	1.76937e-225	up	4.29382e-222	7.97302	up	--	--	Biological Process: signal transduction (GO:0007165);; Molecular Function: ADP binding (GO:0043531);;	K00695|8.2e-89|mtr:MTR_6g478030|K00695 sucrose synthase [EC:2.4.1.13] | (RefSeq) sucrose synthase	Starch and sucrose metabolism (ko00500)	--	--	TIR domain	Disease resistance protein Roq1 OS=Nicotiana benthamiana OX=4100 GN=ROQ1 PE=1 SV=1	S	Function unknown	PREDICTED: disease resistance protein RPS6-like [Prunus mume]	biological process: cellular process (GO:0009987);; biological process: biological regulation (GO:0065007);; molecular function: binding (GO:0005488)
PaF106G0100005594.01	PaF106G0100005594.01	0.691551	47	0.91207	58	1.77113	131	3.82406	282	2.50542	154	5.44106	388	2.93106e-06	-1.41329	down	down	down	down	4.68481e-07	down	2.93106e-06	-1.41329	down	--	--	Biological Process: protein glycosylation (GO:0006486);; Cellular Component: integral component of membrane (GO:0016021);; Molecular Function: transferase activity, transferring glycosyl groups (GO:0016757);;	K18789|3.6e-115|psom:113282164|K18789 xylogalacturonan beta-1,3-xylosyltransferase [EC:2.4.2.41] | (RefSeq) probable glycosyltransferase At5g20260	--	[GMW]	Carbohydrate transport and metabolism;; Cell wall/membrane/envelope biogenesis;; Extracellular structures	Exostosin family	Probable glycosyltransferase At5g25310 OS=Arabidopsis thaliana OX=3702 GN=At5g25310 PE=3 SV=2	--	--	PREDICTED: probable glycosyltransferase At5g25310 [Prunus mume]	biological process: metabolic process (GO:0008152);; biological process: cellular process (GO:0009987);; biological process: single-organism process (GO:0044699);; cellular component: membrane (GO:0016020);; cellular component: membrane part (GO:0044425);; molecular function: catalytic activity (GO:0003824)
PaF106G0600025754.01	PaF106G0600025754.01	0.09747	8	0.237789	17	0.253994	21	1.33835	110	1.59089	109	0.893946	71	6.92503e-09	-1.92116	down	down	down	down	7.18757e-10	down	6.92503e-09	-1.92116	down	--	--	Cellular Component: plasma membrane (GO:0005886);; Biological Process: carbohydrate transport (GO:0008643);; Cellular Component: integral component of membrane (GO:0016021);; Molecular Function: sugar transmembrane transporter activity (GO:0051119);;	K15382|1.4e-120|pper:18772248|K15382 solute carrier family 50 (sugar transporter) | (RefSeq) bidirectional sugar transporter NEC1	--	[R]	General function prediction only	Sugar efflux transporter for intercellular exchange	Bidirectional sugar transporter NEC1 OS=Petunia hybrida OX=4102 GN=NEC1 PE=2 SV=1	U	Intracellular trafficking, secretion, and vesicular transport	unnamed protein product [Prunus armeniaca]	cellular component: cell (GO:0005623);; cellular component: membrane (GO:0016020);; cellular component: cell part (GO:0044464);; biological process: single-organism process (GO:0044699);; biological process: localization (GO:0051179);; cellular component: membrane part (GO:0044425);; molecular function: transporter activity (GO:0005215)
PaF106G0100001107.01	PaF106G0100001107.01	55.4508	3822	53.2391	3426	54.6357	4096	28.5762	2147	27.4667	1728	27.2385	1984	4.89488e-41	1.03197	up	up	up	up	6.68148e-43	up	4.89488e-41	1.03197	up	--	--	Cellular Component: nucleus (GO:0005634);; Molecular Function: zinc ion binding (GO:0008270);; Biological Process: regulation of flower development (GO:0009909);;	K12135|7.3e-11|thj:104802991|K12135 zinc finger protein CONSTANS | (RefSeq) zinc finger protein CONSTANS-LIKE 2-like	Circadian rhythm - plant (ko04712)	[K]	Transcription	B-box zinc finger	Zinc finger protein CONSTANS-LIKE 5 OS=Arabidopsis thaliana OX=3702 GN=COL5 PE=2 SV=2	K	Transcription	zinc finger protein CONSTANS-LIKE 5 [Prunus persica]	cellular component: cell (GO:0005623);; cellular component: organelle (GO:0043226);; cellular component: cell part (GO:0044464);; molecular function: binding (GO:0005488);; biological process: biological regulation (GO:0065007)
PaF106G0200008433.01	PaF106G0200008433.01	1.68477	89	2.28736	109	2.43151	127	0.064056	3	0.035793	2	0.058478	4	5.89237e-26	3.48807	up	up	up	up	1.59951e-27	up	5.89237e-26	3.48807	up	--	--	Biological Process: signal transduction (GO:0007165);; Molecular Function: ADP binding (GO:0043531);;	K13459|8.6e-23|vvi:100265494|K13459 disease resistance protein RPS2 | (RefSeq) probable disease resistance protein At1g52660	Plant-pathogen interaction (ko04626)	--	--	TIR domain	Disease resistance protein RUN1 OS=Vitis rotundifolia OX=103349 GN=RUN1 PE=1 SV=1	S	Function unknown	disease resistance protein RUN1-like [Prunus dulcis]	biological process: cellular process (GO:0009987);; biological process: biological regulation (GO:0065007);; molecular function: binding (GO:0005488)
PaF106G0800032608.01	PaF106G0800032608.01	0.254489	18	0.676069	42	0.701195	50	6.72551	476	8.3208	489	5.9643	397	5.68046e-40	-3.13359	down	down	down	down	8.13417e-42	down	5.68046e-40	-3.13359	down	--	--	--	--	--	--	--	--	--	S	Function unknown	TMV resistance protein N-like [Prunus yedoensis var. nudiflora]	--
PaF106G0700028161.01	PaF106G0700028161.01	3.13909	157	4.02484	188	2.33991	127	7.20315	391	9.96578	452	6.74643	355	4.11594e-07	-1.13331	down	down	down	down	5.6882e-08	down	4.11594e-07	-1.13331	down	--	--	Molecular Function: peroxidase activity (GO:0004601);; Cellular Component: extracellular region (GO:0005576);; Biological Process: response to oxidative stress (GO:0006979);; Molecular Function: heme binding (GO:0020037);; Biological Process: hydrogen peroxide catabolic process (GO:0042744);; Molecular Function: metal ion binding (GO:0046872);;	K00430|6.9e-179|pmum:103339405|K00430 peroxidase [EC:1.11.1.7] | (RefSeq) peroxidase A2-like	Phenylpropanoid biosynthesis (ko00940)	--	--	Peroxidase	Peroxidase 53 OS=Arabidopsis thaliana OX=3702 GN=PER53 PE=1 SV=1	Q	Secondary metabolites biosynthesis, transport and catabolism	unnamed protein product [Prunus armeniaca]	biological process: metabolic process (GO:0008152);; biological process: cellular process (GO:0009987);; biological process: single-organism process (GO:0044699);; biological process: response to stimulus (GO:0050896);; biological process: detoxification (GO:0098754);; molecular function: catalytic activity (GO:0003824);; molecular function: antioxidant activity (GO:0016209);; cellular component:…
PaF106G0100005494.01	PaF106G0100005494.01	1.08608	138	1.57655	186	0.776094	107	0.175805	25	0.079897	10	0.145998	20	1.38949e-14	2.40025	up	up	up	up	7.85141e-16	up	1.38949e-14	2.40025	up	[G]	Carbohydrate transport and metabolism	Molecular Function: pectate lyase activity (GO:0030570);; Biological Process: pectin catabolic process (GO:0045490);; Molecular Function: metal ion binding (GO:0046872);;	K01728|5.6e-80|pavi:110764871|K01728 pectate lyase [EC:4.2.2.2] | (RefSeq) probable pectate lyase 4	Pentose and glucuronate interconversions (ko00040)	--	--	Pectate lyase	Pectate lyase 1 OS=Hesperocyparis arizonica OX=49011 PE=1 SV=2	G	Carbohydrate transport and metabolism	probable pectate lyase 4 [Prunus avium]	molecular function: catalytic activity (GO:0003824);; biological process: metabolic process (GO:0008152);; molecular function: binding (GO:0005488)
PaF106G0100006458.01	PaF106G0100006458.01	2.38729	150	3.58056	210	3.42848	235	0.67071	46	0.560371	32	0.490804	33	1.92403e-18	2.18811	up	up	up	up	8.06718e-20	up	1.92403e-18	2.18811	up	--		Molecular Function: transmembrane receptor protein serine/threonine kinase activity (GO:0004675);; Molecular Function: receptor binding (GO:0005102);; Molecular Function: ATP binding (GO:0005524);;	K13416|1.6e-189|pper:18792858|K13416 brassinosteroid insensitive 1-associated receptor kinase 1 [EC:2.7.10.1 2.7.11.1] | (RefSeq) BRASSINOSTEROID INSENSITIVE 1-associated receptor kinase 1	MAPK signaling pathway - plant (ko04016);; Plant hormone signal transduction (ko04075);; Plant-pathogen interaction (ko04626)	[T]	Signal transduction mechanisms	Protein kinase domain	BRASSINOSTEROID INSENSITIVE 1-associated receptor kinase 1 OS=Arabidopsis thaliana OX=3702 GN=BAK1 PE=1 SV=2	T	Signal transduction mechanisms	BRASSINOSTEROID INSENSITIVE 1-associated receptor kinase 1-like [Prunus dulcis]	biological process: metabolic process (GO:0008152);; biological process: cellular process (GO:0009987);; biological process: signaling (GO:0023052);; biological process: single-organism process (GO:0044699);; biological process: response to stimulus (GO:0050896);; biological process: biological regulation (GO:0065007);; molecular function: catalytic activity (GO:0003824);; molecular function: sig…
PaF106G0300012745.01	PaF106G0300012745.01	1.90813	104	1.83047	93	2.11555	125	11.1167	655	12.0707	595	9.09839	520	2.1157e-42	-2.25236	down	down	down	down	2.71355e-44	down	2.1157e-42	-2.25236	down	--	--	Molecular Function: nucleic acid binding (GO:0003676);; Molecular Function: aspartic-type endopeptidase activity (GO:0004190);; Biological Process: DNA integration (GO:0015074);;	K12349|2.2e-102|ccaj:109806181|K12349 neutral ceramidase [EC:3.5.1.23] | (RefSeq) neutral ceramidase-like	Sphingolipid metabolism (ko00600)	[R]	General function prediction only	Integrase zinc binding domain	--	L	Replication, recombination and repair	transposable element gene [Prunus dulcis]	molecular function: binding (GO:0005488);; biological process: metabolic process (GO:0008152);; molecular function: catalytic activity (GO:0003824);; biological process: cellular process (GO:0009987)
PaF106G0200007071.01	PaF106G0200007071.01	0.095092	5	0.107301	5	0.143781	8	1.16155	62	0.962243	43	1.16319	60	2.33991e-08	-2.01479	down	down	down	down	2.61785e-09	down	2.33991e-08	-2.01479	down	--	--	Molecular Function: ADP binding (GO:0043531);;	K12818|3.3e-20|mtr:MTR_0267s0070|K12818 ATP-dependent RNA helicase DHX8/PRP22 [EC:3.6.4.13] | (RefSeq) NB-ARC domain disease resistance protein, putative	Spliceosome (ko03040)	--	--	Leucine Rich repeats (2 copies)	--	T	Signal transduction mechanisms	putative disease resistance RPP13-like protein 1 [Prunus dulcis]	molecular function: binding (GO:0005488)
PaF106G0100006087.01	PaF106G0100006087.01	11.4429	439	14.1107	498	13.878	597	4.46629	188	4.14177	146	5.59365	221	1.27475e-18	1.47307	up	up	up	up	5.2792e-20	up	1.27475e-18	1.47307	up	--	--	Molecular Function: antiporter activity (GO:0015297);; Cellular Component: integral component of membrane (GO:0016021);; Molecular Function: xenobiotic transporter activity (GO:0042910);;	K03327|1.7e-54|pmum:103319628|K03327 multidrug resistance protein, MATE family | (RefSeq) protein DETOXIFICATION 27-like	--	[R]	General function prediction only	--	Protein DETOXIFICATION 27 OS=Arabidopsis thaliana OX=3702 GN=DTX27 PE=2 SV=1	V	Defense mechanisms	unnamed protein product [Prunus armeniaca]	biological process: localization (GO:0051179);; molecular function: transporter activity (GO:0005215);; cellular component: membrane (GO:0016020);; cellular component: membrane part (GO:0044425)
PaF106G0600024979.01	PaF106G0600024979.01	3.28357	83	9.01103	211	9.3457	255	1.5598	43	1.09852	26	1.6957	45	3.60387e-09	1.84722	up	up	up	up	3.61241e-10	up	3.60387e-09	1.84722	up	--	--	--	--	--	--	--	--	--	--	--	unnamed protein product [Prunus armeniaca]	--
PaF106G0800030995.01	PaF106G0800030995.01	3.0208	199	5.18013	319	5.68247	407	11.2949	810	14.1403	848	9.0766	631	2.58673e-08	-1.14557	down	down	down	down	2.9153e-09	down	2.58673e-08	-1.14557	down	--	--	Biological Process: regulation of cyclin-dependent protein serine/threonine kinase activity (GO:0000079);; Cellular Component: cyclin-dependent protein kinase holoenzyme complex (GO:0000307);; Cellular Component: nucleus (GO:0005634);; Cellular Component: cytoplasm (GO:0005737);; Molecular Function: cyclin-dependent protein serine/threonine kinase regulator activity (GO:0016538);; Cellular Compon…	K14505|1.1e-107|pmum:103335336|K14505 cyclin D3, plant | (RefSeq) cyclin-D3-1	Plant hormone signal transduction (ko04075)	[D]	Cell cycle control, cell division, chromosome partitioning	Cyclin, N-terminal domain	Cyclin-D3-1 OS=Arabidopsis thaliana OX=3702 GN=CYCD3-1 PE=1 SV=3	D	Cell cycle control, cell division, chromosome partitioning	PREDICTED: cyclin-D3-1 [Prunus mume]	biological process: biological regulation (GO:0065007);; cellular component: cell (GO:0005623);; cellular component: macromolecular complex (GO:0032991);; cellular component: cell part (GO:0044464);; cellular component: organelle (GO:0043226);; molecular function: molecular function regulator (GO:0098772);; cellular component: other organism (GO:0044215);; cellular component: other organism part …
PaF106G0300014441.01	PaF106G0300014441.01	0.400407	110	0.571346	146	0.575374	171	0.307841	92	0.238752	60	0.15912	46	0.000232297	1.02575	up	up	up	up	5.50608e-05	up	0.000232297	1.02575	up	--	--	Molecular Function: ADP binding (GO:0043531);;	K20003|8.3e-17|dzi:111280650|K20003 palmitoyltransferase ZDHHC4 [EC:2.3.1.225] | (RefSeq) uncharacterized protein LOC111280650	--	--	--	Leucine Rich repeats (2 copies)	--	T	Signal transduction mechanisms	PREDICTED: uncharacterized protein LOC103327487 [Prunus mume]	molecular function: binding (GO:0005488)
Prunus_sibirica_newGene_317	--	4.27654	338	4.54601	344	4.12523	408	1.94227	186	1.82233	140	2.07627	181	3.73273e-12	1.13647	up	up	up	up	2.57834e-13	up	3.73273e-12	1.13647	up	[M]	Cell wall/membrane/envelope biogenesis	Molecular Function: protein serine/threonine kinase activity (GO:0004674);; Molecular Function: ATP binding (GO:0005524);; Cellular Component: plasma membrane (GO:0005886);; Cellular Component: integral component of membrane (GO:0016021);; Biological Process: protein autophosphorylation (GO:0046777);;	K13418|1.0e-70|oeu:111372301|K13418 somatic embryogenesis receptor kinase 1 [EC:2.7.10.1 2.7.11.1] | (RefSeq) somatic embryogenesis receptor kinase 2	--	--	--	Protein kinase domain	Probable LRR receptor-like serine/threonine-protein kinase At1g56140 OS=Arabidopsis thaliana OX=3702 GN=At1g56140 PE=2 SV=2	T	Signal transduction mechanisms	probable LRR receptor-like serine/threonine-protein kinase At1g56130 [Prunus dulcis]	biological process: metabolic process (GO:0008152);; biological process: cellular process (GO:0009987);; molecular function: catalytic activity (GO:0003824);; molecular function: binding (GO:0005488);; cellular component: cell (GO:0005623);; cellular component: membrane (GO:0016020);; cellular component: cell part (GO:0044464);; cellular component: membrane part (GO:0044425)
PaF106G0100006400.01	PaF106G0100006400.01	0.057953	8	0.089686	11	0.123852	18	1.17527	165	1.46649	172	0.992751	135	1.67153e-22	-2.86724	down	down	down	down	5.57924e-24	down	1.67153e-22	-2.86724	down	--	--	Molecular Function: zinc ion binding (GO:0008270);;	K23541|7.0e-135|vvi:100265089|K23541 Ca2+/H+ antiporter, TMEM165/GDT1 family | (RefSeq) putative pentatricopeptide repeat-containing protein At3g23330	--	[R]	General function prediction only	PPR repeat family	Pentatricopeptide repeat-containing protein At3g13880 OS=Arabidopsis thaliana OX=3702 GN=PCMP-E89 PE=2 SV=1	S	Function unknown	PREDICTED: pentatricopeptide repeat-containing protein At3g13880 [Prunus mume]	molecular function: binding (GO:0005488)
PaF106G0500019697.01	PaF106G0500019697.01	2.32373	250	2.87566	284	3.31259	387	8.97415	1045	7.89256	770	6.9062	782	7.07859e-20	-1.35423	down	down	down	down	2.72001e-21	down	7.07859e-20	-1.35423	down	--	--	Molecular Function: protein dimerization activity (GO:0046983);;	K13422|2.7e-38|egr:104445939|K13422 transcription factor MYC2 | (RefSeq) transcription factor MYC2	MAPK signaling pathway - plant (ko04016);; Plant hormone signal transduction (ko04075)	--	--	bHLH-MYC and R2R3-MYB transcription factors N-terminal	Transcription factor GLABRA 3 OS=Arabidopsis thaliana OX=3702 GN=GL3 PE=1 SV=1	K	Transcription	unnamed protein product [Prunus armeniaca]	molecular function: binding (GO:0005488)
PaF106G0400015069.01	PaF106G0400015069.01	1.34538	71	1.27482	62	0.861879	49	0.035244	3	0	0	0.079984	5	2.17601e-12	2.58226	up	up	up	up	1.47616e-13	up	2.17601e-12	2.58226	up	[G]	Carbohydrate transport and metabolism	Molecular Function: polygalacturonase activity (GO:0004650);; Cellular Component: extracellular region (GO:0005576);; Biological Process: carbohydrate metabolic process (GO:0005975);; Biological Process: cell wall organization (GO:0071555);;	K01184|1.0e-221|pmum:103326925|K01184 polygalacturonase [EC:3.2.1.15] | (RefSeq) polygalacturonase-like	Pentose and glucuronate interconversions (ko00040)	--	--	Glycosyl hydrolases family 28	Polygalacturonase OS=Prunus persica OX=3760 PE=2 SV=1	G	Carbohydrate transport and metabolism	unnamed protein product [Prunus armeniaca]	molecular function: catalytic activity (GO:0003824);; cellular component: extracellular region (GO:0005576);; biological process: metabolic process (GO:0008152);; biological process: cellular process (GO:0009987);; biological process: cellular component organization or biogenesis (GO:0071840)
PaF106G0300011181.01	PaF106G0300011181.01	2.52309	84	2.48966	78	2.95412	107	1.24021	45	1.15961	36	0.968861	34	0.000141667	1.09888	up	up	up	up	3.19398e-05	up	0.000141667	1.09888	up	--	--	--	--	--	--	--	--	--	--	--	hypothetical protein G4B88_006529 [Cannabis sativa]	--
PaF106G0400016908.01	PaF106G0400016908.01	0.055766	8	0.072344	10	0.070273	11	0.422222	63	0.474378	59	0.556211	80	1.74477e-08	-1.93246	down	down	down	down	1.92505e-09	down	1.74477e-08	-1.93246	down	--	--	Cellular Component: integral component of membrane (GO:0016021);;	K13466|2.2e-42|pxb:103943541|K13466 EIX receptor 1/2 | (RefSeq) probable leucine-rich repeat receptor-like protein kinase At5g63930	Plant-pathogen interaction (ko04626)	[R]	General function prediction only	Leucine rich repeat	Receptor-like protein 43 OS=Arabidopsis thaliana OX=3702 GN=RLP43 PE=2 SV=1	S	Function unknown	receptor-like protein EIX2 [Prunus dulcis]	cellular component: membrane (GO:0016020);; cellular component: membrane part (GO:0044425)
PaF106G0600025258.01	PaF106G0600025258.01	0.309353	18	0.112644	6	0.39056	24	1.72236	106	1.50526	77	2.33456	139	3.38346e-09	-1.97271	down	down	down	down	3.3845e-10	down	3.38346e-09	-1.97271	down	--	--	Cellular Component: integral component of membrane (GO:0016021);;	K03453|6.9e-28|pavi:110772440|K03453 bile acid:Na+ symporter, BASS family | (RefSeq) probable sodium/metabolite cotransporter BASS2, chloroplastic	--	[O]	Posttranslational modification, protein turnover, chaperones	--	Chaperone protein dnaJ 10 OS=Arabidopsis thaliana OX=3702 GN=ATJ10 PE=2 SV=2	P	Inorganic ion transport and metabolism	probable sodium/metabolite cotransporter BASS2, chloroplastic [Prunus avium]	cellular component: membrane (GO:0016020);; cellular component: membrane part (GO:0044425)
PaF106G0600025336.01	PaF106G0600025336.01	12.7697	560	9.46169	387	9.12646	435	47.8019	2247	55.5032	2196	53.4868	2469	7.74986e-53	-2.14816	down	down	down	down	7.10557e-55	down	7.74986e-53	-2.14816	down	--	--	Molecular Function: molecular_function (GO:0003674);; Molecular Function: binding (GO:0005488);; Molecular Function: carbohydrate binding (GO:0030246);;	K03188|6.2e-70|dcr:108224146|K03188 urease accessory protein | (RefSeq) uncharacterized protein LOC108224146 isoform X1	--	--	--	Phloem protein 2	F-box protein PP2-B15 OS=Arabidopsis thaliana OX=3702 GN=PP2B15 PE=2 SV=2	S	Function unknown	PREDICTED: LOW QUALITY PROTEIN: F-box protein PP2-B15-like [Prunus mume]	molecular function: binding (GO:0005488)
PaF106G0100006405.01	PaF106G0100006405.01	3.73634	234	3.05343	176	3.40919	230	11.509	770	9.68738	538	10.8412	702	1.04163e-22	-1.48933	down	down	down	down	3.41235e-24	down	1.04163e-22	-1.48933	down	--	--	Molecular Function: UDP-glycosyltransferase activity (GO:0008194);; Cellular Component: intracellular membrane-bounded organelle (GO:0043231);;	K22845|8.8e-243|pper:18789439|K22845 phlorizin synthase [EC:2.4.1.357] | (RefSeq) UDP-glycosyltransferase 88F5	Flavonoid biosynthesis (ko00941)	[GC]	Carbohydrate transport and metabolism;; Energy production and conversion	UDP-glucoronosyl and UDP-glucosyl transferase	UDP-glycosyltransferase 88F5 OS=Malus domestica OX=3750 GN=UGT88F5 PE=2 SV=1	--	--	unnamed protein product [Prunus armeniaca]	molecular function: catalytic activity (GO:0003824);; cellular component: cell (GO:0005623);; cellular component: organelle (GO:0043226);; cellular component: cell part (GO:0044464)
PaF106G0800030449.01	PaF106G0800030449.01	1.32044	232	1.76863	290	1.69636	324	0.482718	93	0.546267	88	0.52161	97	3.98662e-15	1.56191	up	up	up	up	2.14177e-16	up	3.98662e-15	1.56191	up	[R]	General function prediction only	Biological Process: signal transduction (GO:0007165);; Molecular Function: ADP binding (GO:0043531);;	K00695|1.3e-103|mtr:MTR_6g478030|K00695 sucrose synthase [EC:2.4.1.13] | (RefSeq) sucrose synthase	Starch and sucrose metabolism (ko00500)	--	--	TIR domain	TMV resistance protein N OS=Nicotiana glutinosa OX=35889 GN=N PE=1 SV=1	T	Signal transduction mechanisms	PREDICTED: disease resistance protein TAO1-like isoform X1 [Prunus mume]	biological process: cellular process (GO:0009987);; biological process: biological regulation (GO:0065007);; molecular function: binding (GO:0005488)
PaF106G0600024407.01	PaF106G0600024407.01	0.428688	25	0.404389	22	0.358349	22	3.26364	201	2.79998	144	2.91398	174	2.09802e-20	-2.4051	down	down	down	down	7.81326e-22	down	2.09802e-20	-2.4051	down	[P]	Inorganic ion transport and metabolism	Biological Process: response to reactive oxygen species (GO:0000302);; Molecular Function: peroxidase activity (GO:0004601);; Cellular Component: cytosol (GO:0005829);; Cellular Component: chloroplast (GO:0009507);; Molecular Function: heme binding (GO:0020037);; Biological Process: cellular response to oxidative stress (GO:0034599);; Biological Process: hydrogen peroxide catabolic process (GO:00…	K00434|4.9e-145|pper:18772001|K00434 L-ascorbate peroxidase [EC:1.11.1.11] | (RefSeq) L-ascorbate peroxidase 2, cytosolic	Ascorbate and aldarate metabolism (ko00053);; Glutathione metabolism (ko00480)	--	--	Peroxidase	L-ascorbate peroxidase 2, cytosolic OS=Arabidopsis thaliana OX=3702 GN=APX2 PE=2 SV=3	C	Energy production and conversion	unnamed protein product [Prunus armeniaca]	biological process: response to stimulus (GO:0050896);; biological process: metabolic process (GO:0008152);; biological process: cellular process (GO:0009987);; biological process: single-organism process (GO:0044699);; biological process: detoxification (GO:0098754);; molecular function: catalytic activity (GO:0003824);; molecular function: antioxidant activity (GO:0016209);; cellular component:…
PaF106G0300014550.01	PaF106G0300014550.01	1.56476	160	0.98929	94	1.25627	140	0.416352	47	0.320082	30	0.254342	28	7.48061e-09	1.66042	up	up	up	up	7.79888e-10	up	7.48061e-09	1.66042	up	--	--	Molecular Function: protein kinase activity (GO:0004672);; Molecular Function: ATP binding (GO:0005524);; Cellular Component: integral component of membrane (GO:0016021);;	--	--	--	--	Leucine rich repeat	--	T	Signal transduction mechanisms	probable inactive leucine-rich repeat receptor-like protein kinase At3g03770 isoform X2 [Prunus avium]	biological process: metabolic process (GO:0008152);; biological process: cellular process (GO:0009987);; molecular function: catalytic activity (GO:0003824);; molecular function: binding (GO:0005488);; cellular component: membrane (GO:0016020);; cellular component: membrane part (GO:0044425)
PaF106G0100004308.01	PaF106G0100004308.01	13.1481	346	15.7521	386	17.3322	495	0	0	0	0	0	0	2.00588e-84	5.902	up	up	up	up	8.36901e-87	up	2.00588e-84	5.902	up	[O]	Posttranslational modification, protein turnover, chaperones	Molecular Function: serine-type endopeptidase activity (GO:0004252);; Cellular Component: extracellular space (GO:0005615);;	K12663|6.4e-07|aip:107640222|K12663 Delta3,5-Delta2,4-dienoyl-CoA isomerase [EC:5.3.3.21] | (RefSeq) delta(3,5)-Delta(2,4)-dienoyl-CoA isomerase, peroxisomal-like	Peroxisome (ko04146)	--	--	Subtilase family	Subtilisin-like protease SBT3 OS=Solanum lycopersicum OX=4081 GN=sbt3 PE=1 SV=1	O	Posttranslational modification, protein turnover, chaperones	hypothetical protein PRUPE_1G433200 [Prunus persica]	biological process: metabolic process (GO:0008152);; molecular function: catalytic activity (GO:0003824);; cellular component: extracellular region (GO:0005576);; cellular component: extracellular region part (GO:0044421)
PaF106G0300014318.01	PaF106G0300014318.01	0.437413	43	0.572548	53	0.698644	75	0.19757	22	0.133823	12	0.186185	20	0.000235782	1.28136	up	up	up	up	5.6061e-05	up	0.000235782	1.28136	up	--	--	Cellular Component: integral component of membrane (GO:0016021);;	--	--	--	--	Leucine rich repeat	Tyrosine-sulfated glycopeptide receptor 1 OS=Arabidopsis thaliana OX=3702 GN=PSY1R PE=1 SV=1	T	Signal transduction mechanisms	PREDICTED: receptor-like protein 2 [Prunus mume]	cellular component: membrane (GO:0016020);; cellular component: membrane part (GO:0044425)
PaF106G0600021781.01	PaF106G0600021781.01	2.98724	68	2.57934	55	1.9121	48	0.221121	6	0	0	0	0	4.9832e-11	2.47228	up	up	up	up	3.93492e-12	up	4.9832e-11	2.47228	up	--	--	--	K15382|2.9e-32|spen:107015960|K15382 solute carrier family 50 (sugar transporter) | (RefSeq) bidirectional sugar transporter SWEET1-like isoform X1	--	[R]	General function prediction only	PPR repeat	Pentatricopeptide repeat-containing protein At5g66520 OS=Arabidopsis thaliana OX=3702 GN=PCMP-H61 PE=2 SV=1	S	Function unknown	pentatricopeptide repeat-containing protein At5g66520-like [Prunus dulcis]	--
PaF106G0100002943.01	PaF106G0100002943.01	5.43017	404	6.42165	445	8.0316	649	0.195515	16	0.197665	14	0.281354	23	9.22398e-79	4.30965	up	up	up	up	4.22857e-81	up	9.22398e-79	4.30965	up	[QV]	Secondary metabolites biosynthesis, transport and catabolism;; Defense mechanisms	Molecular Function: monooxygenase activity (GO:0004497);; Molecular Function: iron ion binding (GO:0005506);; Cellular Component: integral component of membrane (GO:0016021);; Molecular Function: oxidoreductase activity, acting on paired donors, with incorporation or reduction of molecular oxygen (GO:0016705);; Molecular Function: heme binding (GO:0020037);;	K01773|2.0e-177|pop:7480952|K01773 aldoxime dehydratase [EC:4.99.1.-] | (RefSeq) cytochrome P450 71B36	--	[Q]	Secondary metabolites biosynthesis, transport and catabolism	Cytochrome P450	Cytochrome P450 71B36 OS=Arabidopsis thaliana OX=3702 GN=CYP71B36 PE=3 SV=1	Q	Secondary metabolites biosynthesis, transport and catabolism	PREDICTED: cytochrome P450 71B36-like [Prunus mume]	biological process: metabolic process (GO:0008152);; biological process: single-organism process (GO:0044699);; molecular function: catalytic activity (GO:0003824);; molecular function: binding (GO:0005488);; cellular component: membrane (GO:0016020);; cellular component: membrane part (GO:0044425)
PaF106G0700029172.01	PaF106G0700029172.01	11.6411	589	13.8032	651	9.79755	538	5.60862	309	5.31754	245	6.03902	322	1.99137e-10	1.06933	up	up	up	up	1.69452e-11	up	1.99137e-10	1.06933	up	--	--	Molecular Function: calcium ion binding (GO:0005509);; Molecular Function: calcium-dependent phospholipid binding (GO:0005544);; Cellular Component: cytoplasm (GO:0005737);;	K17098|1.9e-181|pmum:103339016|K17098 annexin D | (RefSeq) annexin A13-like	--	[U]	Intracellular trafficking, secretion, and vesicular transport	Annexin	Annexin D2 OS=Arabidopsis thaliana OX=3702 GN=ANN2 PE=1 SV=1	U	Intracellular trafficking, secretion, and vesicular transport	PREDICTED: annexin A13-like [Prunus mume]	molecular function: binding (GO:0005488);; cellular component: cell (GO:0005623);; cellular component: cell part (GO:0044464)
PaF106G0200007393.01	PaF106G0200007393.01	1.77537	323	1.76424	299	2.0181	399	0.798343	158	0.830144	138	0.979384	188	6.12298e-10	1.09355	up	up	up	up	5.51617e-11	up	6.12298e-10	1.09355	up	[R]	General function prediction only	Molecular Function: ADP binding (GO:0043531);;	K12818|1.7e-199|mtr:MTR_0267s0070|K12818 ATP-dependent RNA helicase DHX8/PRP22 [EC:3.6.4.13] | (RefSeq) NB-ARC domain disease resistance protein, putative	Spliceosome (ko03040)	[T]	Signal transduction mechanisms	NB-ARC domain	Putative disease resistance RPP13-like protein 1 OS=Arabidopsis thaliana OX=3702 GN=RPPL1 PE=3 SV=1	T	Signal transduction mechanisms	PREDICTED: LOW QUALITY PROTEIN: putative disease resistance RPP13-like protein 1 [Prunus mume]	molecular function: binding (GO:0005488)
PaF106G0100004783.01	PaF106G0100004783.01	3.15378	97	1.8118	53	4.27763	140	0.788906	27	1.3906	36	0.903865	31	8.19281e-05	1.29198	up	up	up	up	1.7509e-05	up	8.19281e-05	1.29198	up	--	--	Molecular Function: transcription factor activity, sequence-specific DNA binding (GO:0003700);; Cellular Component: nucleus (GO:0005634);; Molecular Function: sequence-specific DNA binding (GO:0043565);;	K13424|6.8e-23|gmx:100127397|K13424 WRKY transcription factor 33 | (RefSeq) WRKY62; WRKY transcription factor 62	MAPK signaling pathway - plant (ko04016);; Plant-pathogen interaction (ko04626)	--	--	WRKY DNA -binding domain	Probable WRKY transcription factor 50 OS=Arabidopsis thaliana OX=3702 GN=WRKY50 PE=2 SV=1	K	Transcription	unnamed protein product [Prunus armeniaca]	biological process: biological regulation (GO:0065007);; molecular function: nucleic acid binding transcription factor activity (GO:0001071);; cellular component: cell (GO:0005623);; cellular component: organelle (GO:0043226);; cellular component: cell part (GO:0044464);; molecular function: binding (GO:0005488)
PaF106G0300013389.01	PaF106G0300013389.01	8.93619	754	11.2804	888	10.7719	988	28.4583	2613	31.8304	2442	20.5596	1830	6.77309e-19	-1.25839	down	down	down	down	2.75264e-20	down	6.77309e-19	-1.25839	down	[IQ]	Lipid transport and metabolism;; Secondary metabolites biosynthesis, transport and catabolism	Molecular Function: ligase activity (GO:0016874);;	K01904|0.0e+00|pmum:103328252|K01904 4-coumarate--CoA ligase [EC:6.2.1.12] | (RefSeq) 4-coumarate--CoA ligase 1-like	Ubiquinone and other terpenoid-quinone biosynthesis (ko00130);; Phenylpropanoid biosynthesis (ko00940)	[I]	Lipid transport and metabolism	AMP-binding enzyme	4-coumarate--CoA ligase 2 OS=Nicotiana tabacum OX=4097 GN=4CL2 PE=1 SV=1	I	Lipid transport and metabolism	unnamed protein product [Prunus armeniaca]	molecular function: catalytic activity (GO:0003824)
Prunus_sibirica_newGene_1385	--	0.260043	13	0.260352	18	0.047299	4	1.871	122	0.78965	48	0.822198	52	4.69004e-05	-1.54191	down	down	down	down	9.54725e-06	down	4.69004e-05	-1.54191	down	--	--	Molecular Function: nucleic acid binding (GO:0003676);; Molecular Function: zinc ion binding (GO:0008270);; Biological Process: DNA integration (GO:0015074);;	K14503|3.8e-26|mdm:114821340|K14503 brassinosteroid resistant 1/2 | (RefSeq) BES1/BZR1 homolog protein 2-like	Plant hormone signal transduction (ko04075)	--	--	gag-polypeptide of LTR copia-type	--	L	Replication, recombination and repair	hypothetical protein Prudu_019255 [Prunus dulcis]	molecular function: binding (GO:0005488);; biological process: metabolic process (GO:0008152);; biological process: cellular process (GO:0009987)
PaF106G0100001890.01	PaF106G0100001890.01	11.689	734	13.7857	808	15.7388	1075	51.9247	3549	34.7324	1984	51.6249	3421	1.38336e-26	-1.60695	down	down	down	down	3.52005e-28	down	1.38336e-26	-1.60695	down	--	--	Molecular Function: transferase activity, transferring acyl groups other than amino-acyl groups (GO:0016747);;	K13065|1.9e-19|dzi:111306278|K13065 shikimate O-hydroxycinnamoyltransferase [EC:2.3.1.133] | (RefSeq) shikimate O-hydroxycinnamoyltransferase-like	Phenylpropanoid biosynthesis (ko00940);; Flavonoid biosynthesis (ko00941);; Stilbenoid, diarylheptanoid and gingerol biosynthesis (ko00945)	--	--	Transferase family	Protein ECERIFERUM 26 OS=Arabidopsis thaliana OX=3702 GN=CER26 PE=2 SV=1	S	Function unknown	unnamed protein product [Prunus armeniaca]	molecular function: catalytic activity (GO:0003824)
PaF106G0600025315.01	PaF106G0600025315.01	10.2654	220	10.4403	209	12.577	293	20.7671	484	27.5681	537	26.8055	605	5.0778e-10	-1.04454	down	down	down	down	4.53534e-11	down	5.0778e-10	-1.04454	down	[O]	Posttranslational modification, protein turnover, chaperones	Biological Process: response to cyclopentenone (GO:0010583);;	K09510|2.7e-11|nau:109209100|K09510 DnaJ homolog subfamily B member 4 | (RefSeq) dnaJ homolog subfamily B member 1-like	--	[O]	Posttranslational modification, protein turnover, chaperones	DnaJ domain	Chaperone protein dnaJ 16 OS=Arabidopsis thaliana OX=3702 GN=ATJ16 PE=2 SV=1	O	Posttranslational modification, protein turnover, chaperones	chaperone protein DnaJ isoform X1 [Prunus dulcis]	biological process: response to stimulus (GO:0050896)
PaF106G0800031238.01	PaF106G0800031238.01	1.1126	59	2.35347	116	2.48007	136	6.22838	355	5.35079	254	4.85238	262	5.56419e-07	-1.2385	down	down	down	down	7.84444e-08	down	5.56419e-07	-1.2385	down	[Q]	Secondary metabolites biosynthesis, transport and catabolism	Molecular Function: metal ion binding (GO:0046872);; Molecular Function: dioxygenase activity (GO:0051213);;	K24028|1.7e-55|aip:107624075|K24028 salicylic acid 3-hydroxylase [EC:1.14.11.-] | (RefSeq) protein DOWNY MILDEW RESISTANCE 6	--	[QR]	Secondary metabolites biosynthesis, transport and catabolism;; General function prediction only	non-haem dioxygenase in morphine synthesis N-terminal	Probable 2-oxoglutarate-dependent dioxygenase At5g05600 OS=Arabidopsis thaliana OX=3702 GN=At5g05600 PE=2 SV=1	Q	Secondary metabolites biosynthesis, transport and catabolism	unnamed protein product [Prunus armeniaca]	molecular function: binding (GO:0005488);; biological process: metabolic process (GO:0008152);; biological process: single-organism process (GO:0044699);; molecular function: catalytic activity (GO:0003824)
PaF106G0600023075.01	PaF106G0600023075.01	1.57841	57	6.35749	214	3.1773	125	20.4624	803	30.0701	986	24.9976	951	1.62063e-05	-1.63785	down	down	down	down	3.00949e-06	down	1.62063e-05	-1.63785	down	[IQR]	Lipid transport and metabolism;; Secondary metabolites biosynthesis, transport and catabolism;; General function prediction only	Molecular Function: oxidoreductase activity (GO:0016491);;	K09841|4.3e-78|nto:104121195|K09841 xanthoxin dehydrogenase [EC:1.1.1.288] | (RefSeq) xanthoxin dehydrogenase-like	Carotenoid biosynthesis (ko00906)	[R]	General function prediction only	Enoyl-(Acyl carrier protein) reductase	Secoisolariciresinol dehydrogenase (Fragment) OS=Forsythia intermedia OX=55183 PE=1 SV=1	Q	Secondary metabolites biosynthesis, transport and catabolism	unnamed protein product [Prunus armeniaca]	molecular function: catalytic activity (GO:0003824)
PaF106G0200008156.01	PaF106G0200008156.01	1.71851	170	1.92486	177	1.57862	169	0.305029	33	0.128102	12	0.287588	30	2.29391e-18	2.41523	up	up	up	up	9.66527e-20	up	2.29391e-18	2.41523	up	--		Molecular Function: protein kinase activity (GO:0004672);; Molecular Function: ATP binding (GO:0005524);; Cellular Component: integral component of membrane (GO:0016021);; Molecular Function: polysaccharide binding (GO:0030247);;	K13416|3.1e-48|ccaj:109804867|K13416 brassinosteroid insensitive 1-associated receptor kinase 1 [EC:2.7.10.1 2.7.11.1] | (RefSeq) BRASSINOSTEROID INSENSITIVE 1-associated receptor kinase 1-like	MAPK signaling pathway - plant (ko04016);; Plant hormone signal transduction (ko04075);; Plant-pathogen interaction (ko04626)	--	--	Protein kinase domain	Rust resistance kinase Lr10 OS=Triticum aestivum OX=4565 GN=LRK10 PE=2 SV=1	T	Signal transduction mechanisms	PREDICTED: LEAF RUST 10 DISEASE-RESISTANCE LOCUS RECEPTOR-LIKE PROTEIN KINASE-like 2.4 [Prunus mume]	biological process: metabolic process (GO:0008152);; biological process: cellular process (GO:0009987);; molecular function: catalytic activity (GO:0003824);; molecular function: binding (GO:0005488);; cellular component: membrane (GO:0016020);; cellular component: membrane part (GO:0044425)
PaF106G0200009897.01	PaF106G0200009897.01	0.751353	46	0.302818	18	1.10347	74	4.44786	297	4.29868	239	3.7758	245	3.28255e-13	-2.04094	down	down	down	down	2.07463e-14	down	3.28255e-13	-2.04094	down	[G]	Carbohydrate transport and metabolism	Molecular Function: UDP-glycosyltransferase activity (GO:0008194);;	K13493|2.2e-113|bna:106432180|K13493 cytokinin-N-glucosyltransferase [EC:2.4.1.-] | (RefSeq) UDP-glycosyltransferase 76C2	Zeatin biosynthesis (ko00908)	[GC]	Carbohydrate transport and metabolism;; Energy production and conversion	UDP-glucoronosyl and UDP-glucosyl transferase	UDP-glycosyltransferase 76F1 OS=Arabidopsis thaliana OX=3702 GN=UGT76F1 PE=2 SV=1	--	--	PREDICTED: UDP-glycosyltransferase 76F1-like [Prunus mume]	molecular function: catalytic activity (GO:0003824)
PaF106G0100002794.01	PaF106G0100002794.01	0.539947	43	0.345974	26	0.531605	46	1.57317	135	1.79732	129	1.21003	101	3.12443e-06	-1.33409	down	down	down	down	5.03239e-07	down	3.12443e-06	-1.33409	down	--	--	Molecular Function: iron ion binding (GO:0005506);; Cellular Component: membrane (GO:0016020);; Molecular Function: oxidoreductase activity, acting on paired donors, with incorporation or reduction of molecular oxygen, NAD(P)H as one donor, and incorporation of one atom of oxygen (GO:0016709);; Molecular Function: heme binding (GO:0020037);;	K23810|7.5e-70|vvi:100254114|K23810 (E)-8-carboxylinalool synthase [EC:1.14.14.-] | (RefSeq) geraniol 8-hydroxylase	Monoterpenoid biosynthesis (ko00902)	[Q]	Secondary metabolites biosynthesis, transport and catabolism	Cytochrome P450	Geraniol 8-hydroxylase OS=Catharanthus roseus OX=4058 GN=CYP76B6 PE=1 SV=1	Q	Secondary metabolites biosynthesis, transport and catabolism	unnamed protein product [Prunus armeniaca]	molecular function: binding (GO:0005488);; cellular component: membrane (GO:0016020);; biological process: metabolic process (GO:0008152);; biological process: single-organism process (GO:0044699);; molecular function: catalytic activity (GO:0003824)
PaF106G0300012327.01	PaF106G0300012327.01	0.858269	56	0.899087	55	1.09002	77	0	0	0	0	0	0	7.06125e-19	3.25012	up	up	up	up	2.87702e-20	up	7.06125e-19	3.25012	up	--	--	Molecular Function: UDP-glycosyltransferase activity (GO:0008194);;	K22706|4.5e-157|pper:18788923|K22706 (R)-mandelonitrile beta-glucosyltransferase [EC:2.4.1.354] | (RefSeq) 7-deoxyloganetin glucosyltransferase	Cyanoamino acid metabolism (ko00460)	[GC]	Carbohydrate transport and metabolism;; Energy production and conversion	UDP-glucoronosyl and UDP-glucosyl transferase	7-deoxyloganetin glucosyltransferase OS=Catharanthus roseus OX=4058 GN=UGT85A23 PE=1 SV=1	--	--	PREDICTED: 7-deoxyloganetin glucosyltransferase-like isoform X1 [Prunus mume]	molecular function: catalytic activity (GO:0003824)
PaF106G0400016584.01	PaF106G0400016584.01	11.0708	759	8.74941	560	9.95259	742	27.7067	2068	24.3044	1516	23.9736	1735	1.55806e-25	-1.24218	down	down	down	down	4.33374e-27	down	1.55806e-25	-1.24218	down	--	--	Molecular Function: transferase activity, transferring acyl groups other than amino-acyl groups (GO:0016747);;	K13065|3.4e-104|pavi:110771447|K13065 shikimate O-hydroxycinnamoyltransferase [EC:2.3.1.133] | (RefSeq) BAHD acyltransferase At5g47980-like	Phenylpropanoid biosynthesis (ko00940);; Flavonoid biosynthesis (ko00941);; Stilbenoid, diarylheptanoid and gingerol biosynthesis (ko00945)	--	--	Transferase family	(13S,14R)-1,13-dihydroxy-N-methylcanadine 13-O-acetyltransferase AT1 OS=Papaver somniferum OX=3469 GN=AT1 PE=1 SV=1	S	Function unknown	PREDICTED: BAHD acyltransferase At5g47980-like [Prunus mume]	molecular function: catalytic activity (GO:0003824)
PaF106G0400016586.01	PaF106G0400016586.01	0.058305	4	0	0	0.244563	16	3.538	230	5.30272	288	3.02617	191	0.00163264	-1.17428	down	down	down	down	0.000472788	down	0.00163264	-1.17428	down	--	--	Molecular Function: transferase activity, transferring acyl groups other than amino-acyl groups (GO:0016747);;	K13065|3.5e-109|pavi:110771447|K13065 shikimate O-hydroxycinnamoyltransferase [EC:2.3.1.133] | (RefSeq) BAHD acyltransferase At5g47980-like	Phenylpropanoid biosynthesis (ko00940);; Flavonoid biosynthesis (ko00941);; Stilbenoid, diarylheptanoid and gingerol biosynthesis (ko00945)	--	--	Transferase family	Stemmadenine O-acetyltransferase OS=Catharanthus roseus OX=4058 GN=SAT PE=1 SV=1	S	Function unknown	PREDICTED: vinorine synthase-like [Prunus mume]	molecular function: catalytic activity (GO:0003824)
PaF106G0300012162.01	PaF106G0300012162.01	402.263	26071	386.758	23372	323.85	22817	204.955	14458	175.881	10367	182.909	12508	7.43608e-23	1.03702	up	up	up	up	2.42073e-24	up	7.43608e-23	1.03702	up	[G]	Carbohydrate transport and metabolism	Molecular Function: polygalacturonase activity (GO:0004650);; Cellular Component: extracellular region (GO:0005576);; Biological Process: carbohydrate metabolic process (GO:0005975);; Biological Process: cell wall organization (GO:0071555);;	K01213|6.1e-230|pmum:103343817|K01213 galacturan 1,4-alpha-galacturonidase [EC:3.2.1.67] | (RefSeq) exopolygalacturonase-like	Pentose and glucuronate interconversions (ko00040)	--	--	Glycosyl hydrolases family 28	Exopolygalacturonase (Fragment) OS=Oenothera organensis OX=3945 PE=2 SV=1	G	Carbohydrate transport and metabolism	PREDICTED: exopolygalacturonase-like [Prunus mume]	molecular function: catalytic activity (GO:0003824);; cellular component: extracellular region (GO:0005576);; biological process: metabolic process (GO:0008152);; biological process: cellular process (GO:0009987);; biological process: cellular component organization or biogenesis (GO:0071840)
Prunus_sibirica_newGene_383	--	0	0	0	0	0	0	0.964512	108	1.09448	103	0.836524	91	2.53942e-27	-3.81211	down	down	down	down	6.187e-29	down	2.53942e-27	-3.81211	down	--	--	Molecular Function: protein dimerization activity (GO:0046983);;	K18757|2.3e-13|nta:107764024|K18757 la-related protein 1 | (RefSeq) la-related protein 1A-like	--	--	--	hAT family C-terminal dimerisation region	--	S	Function unknown	PREDICTED: zinc finger MYM-type protein 1-like [Prunus mume]	molecular function: binding (GO:0005488)
PaF106G0500020082.01	PaF106G0500020082.01	6.7298	654	8.52795	778	8.86923	945	4.44919	476	4.20601	374	3.16267	320	1.68366e-11	1.05804	up	up	up	up	1.2627e-12	up	1.68366e-11	1.05804	up	[O]	Posttranslational modification, protein turnover, chaperones	Molecular Function: serine-type endopeptidase activity (GO:0004252);; Cellular Component: extracellular space (GO:0005615);;	K12663|4.0e-07|aip:107640222|K12663 Delta3,5-Delta2,4-dienoyl-CoA isomerase [EC:5.3.3.21] | (RefSeq) delta(3,5)-Delta(2,4)-dienoyl-CoA isomerase, peroxisomal-like	Peroxisome (ko04146)	--	--	Peptidase inhibitor I9	Subtilisin-like protease SBT3.5 OS=Arabidopsis thaliana OX=3702 GN=SBT3.5 PE=1 SV=1	O	Posttranslational modification, protein turnover, chaperones	PREDICTED: subtilisin-like protease SBT3.10 [Prunus mume]	biological process: metabolic process (GO:0008152);; molecular function: catalytic activity (GO:0003824);; cellular component: extracellular region (GO:0005576);; cellular component: extracellular region part (GO:0044421)
PaF106G0200009482.01	PaF106G0200009482.01	0.597254	31	0.553338	27	0.261208	15	1.82924	104	1.57115	75	1.2558	69	0.000217891	-1.24652	down	down	down	down	5.13807e-05	down	0.000217891	-1.24652	down	--	--	Biological Process: response to acid chemical (GO:0001101);; Biological Process: regulation of response to biotic stimulus (GO:0002831);; Biological Process: organic acid metabolic process (GO:0006082);; Biological Process: cellular aromatic compound metabolic process (GO:0006725);; Biological Process: biological_process (GO:0008150);; Biological Process: metabolic process (GO:0008152);; Biologic…	--	--	--	--	--	--	S	Function unknown	unnamed protein product [Prunus armeniaca]	biological process: response to stimulus (GO:0050896);; biological process: biological regulation (GO:0065007);; biological process: metabolic process (GO:0008152);; biological process: cellular process (GO:0009987);; biological process: single-organism process (GO:0044699);; biological process: multi-organism process (GO:0051704)
PaF106G0200008252.01	PaF106G0200008252.01	0.161888	26	0.346691	50	0.286573	47	1.08124	175	1.31332	178	1.10833	175	6.37945e-11	-1.73198	down	down	down	down	5.11631e-12	down	6.37945e-11	-1.73198	down	--	--	Biological Process: defense response (GO:0006952);; Molecular Function: ADP binding (GO:0043531);;	K15078|1.9e-69|tcc:18614561|K15078 structure-specific endonuclease subunit SLX1 [EC:3.6.1.-] | (RefSeq) putative disease resistance protein RGA3	--	[T]	Signal transduction mechanisms	Leucine rich repeat	Putative disease resistance protein RGA3 OS=Solanum bulbocastanum OX=147425 GN=RGA3 PE=2 SV=2	T	Signal transduction mechanisms	unnamed protein product [Prunus armeniaca]	biological process: response to stimulus (GO:0050896);; molecular function: binding (GO:0005488)
Prunus_sibirica_newGene_175	--	4.06259	733	3.79174	641	2.90412	572	8.81703	1736	8.16832	1345	7.71596	1470	1.54861e-14	-1.08012	down	down	down	down	8.78242e-16	down	1.54861e-14	-1.08012	down	--	--	Molecular Function: nucleic acid binding (GO:0003676);; Molecular Function: RNA-DNA hybrid ribonuclease activity (GO:0004523);;	K00413|9.4e-13|qsu:111992473|K00413 ubiquinol-cytochrome c reductase cytochrome c1 subunit | (RefSeq) cytochrome c1 2, heme protein, mitochondrial-like	Oxidative phosphorylation (ko00190)	[R]	General function prediction only	Reverse transcriptase (RNA-dependent DNA polymerase)	--	L	Replication, recombination and repair	unnamed protein product [Prunus armeniaca]	molecular function: binding (GO:0005488);; biological process: metabolic process (GO:0008152);; biological process: cellular process (GO:0009987);; molecular function: catalytic activity (GO:0003824)
PaF106G0200007395.01	PaF106G0200007395.01	5.08813	1005	5.00442	902	5.82514	1230	1.68782	361	2.39106	424	1.58363	330	5.56999e-24	1.49635	up	up	up	up	1.64971e-25	up	5.56999e-24	1.49635	up	[R]	General function prediction only	Molecular Function: ADP binding (GO:0043531);;	K12818|7.4e-213|mtr:MTR_0267s0070|K12818 ATP-dependent RNA helicase DHX8/PRP22 [EC:3.6.4.13] | (RefSeq) NB-ARC domain disease resistance protein, putative	Spliceosome (ko03040)	[T]	Signal transduction mechanisms	NB-ARC domain	Putative disease resistance RPP13-like protein 1 OS=Arabidopsis thaliana OX=3702 GN=RPPL1 PE=3 SV=1	T	Signal transduction mechanisms	PREDICTED: LOW QUALITY PROTEIN: putative disease resistance RPP13-like protein 1 [Prunus mume]	molecular function: binding (GO:0005488)
PaF106G0400017172.01	PaF106G0400017172.01	0.411263	85	0.621173	119	0.434025	97	0.122208	28	0.074731	14	0.081157	18	7.49162e-10	1.91589	up	up	up	up	6.82499e-11	up	7.49162e-10	1.91589	up	--		Molecular Function: protein serine/threonine kinase activity (GO:0004674);; Molecular Function: calcium ion binding (GO:0005509);; Molecular Function: ATP binding (GO:0005524);; Cellular Component: plasma membrane (GO:0005886);; Biological Process: protein phosphorylation (GO:0006468);; Biological Process: cell surface receptor signaling pathway (GO:0007166);; Cellular Component: integral compone…	K23544|2.8e-101|brp:103842861|K23544 serine incorporator 1/3 | (RefSeq) serine incorporator 3	--	--	--	Protein kinase domain	Wall-associated receptor kinase 1 OS=Arabidopsis thaliana OX=3702 GN=WAK1 PE=1 SV=2	T	Signal transduction mechanisms	uncharacterized protein LOC110760235 [Prunus avium]	biological process: metabolic process (GO:0008152);; biological process: cellular process (GO:0009987);; molecular function: catalytic activity (GO:0003824);; molecular function: binding (GO:0005488);; cellular component: cell (GO:0005623);; cellular component: membrane (GO:0016020);; cellular component: cell part (GO:0044464);; biological process: signaling (GO:0023052);; biological process: sin…
PaF106G0100004836.01	PaF106G0100004836.01	0.03175	2	0.39137	20	0.388983	23	1.04982	61	0.998567	49	0.973684	55	0.00652257	-1.07801	down	down	down	down	0.00224463	down	0.00652257	-1.07801	down	--	--	Biological Process: regulation of transcription, DNA-templated (GO:0006355);; Molecular Function: zinc ion binding (GO:0008270);; Molecular Function: sequence-specific DNA binding (GO:0043565);;	K09184|1.9e-07|dcr:108219662|K09184 GATA-binding protein, other eukaryote | (RefSeq) GATA transcription factor 11-like	--	[K]	Transcription	GATA zinc finger	GATA transcription factor 21 OS=Arabidopsis thaliana OX=3702 GN=GATA21 PE=1 SV=2	K	Transcription	unnamed protein product [Prunus armeniaca]	biological process: biological regulation (GO:0065007);; molecular function: binding (GO:0005488)
PaF106G0800030813.01	PaF106G0800030813.01	0.221075	6	0.384153	21	0.196944	14	1.64416	79	1.79427	69	1.12597	53	3.44161e-05	-1.49968	down	down	down	down	6.78608e-06	down	3.44161e-05	-1.49968	down	--	--	Molecular Function: serine-type carboxypeptidase activity (GO:0004185);; Molecular Function: transferase activity, transferring acyl groups other than amino-acyl groups (GO:0016747);; Biological Process: secondary metabolic process (GO:0019748);;	K16296|6.3e-143|pper:18768693|K16296 serine carboxypeptidase-like clade I [EC:3.4.16.-] | (RefSeq) serine carboxypeptidase-like 13 isoform X2	--	[OE]	Posttranslational modification, protein turnover, chaperones;; Amino acid transport and metabolism	Serine carboxypeptidase	Serine carboxypeptidase-like 18 OS=Arabidopsis thaliana OX=3702 GN=SCPL18 PE=2 SV=2	--	--	serine carboxypeptidase-like 13 isoform X2 [Prunus persica]	biological process: metabolic process (GO:0008152);; molecular function: catalytic activity (GO:0003824);; biological process: single-organism process (GO:0044699)
PaF106G0800031245.01	PaF106G0800031245.01	0.754588	35	0.809941	35	1.01788	50	2.85049	141	2.7011	111	2.50856	120	4.94948e-07	-1.33662	down	down	down	down	6.92427e-08	down	4.94948e-07	-1.33662	down	--	--	Cellular Component: nucleus (GO:0005634);; Biological Process: regulation of transcription, DNA-templated (GO:0006355);;	K23408|5.8e-189|pper:18767620|K23408 cell division cycle-associated protein 7 | (RefSeq) cell division cycle-associated 7-like protein	--	--	--	Zinc-finger domain of monoamine-oxidase A repressor R1	--	S	Function unknown	unnamed protein product [Prunus armeniaca]	cellular component: cell (GO:0005623);; cellular component: organelle (GO:0043226);; cellular component: cell part (GO:0044464);; biological process: biological regulation (GO:0065007)
PaF106G0400017974.01	PaF106G0400017974.01	0.757893	178	0.87033	190	0.851179	217	1.93748	494	2.44718	521	2.19999	544	8.30096e-16	-1.27292	down	down	down	down	4.1817e-17	down	8.30096e-16	-1.27292	down	--	--	Molecular Function: protein serine/threonine kinase activity (GO:0004674);; Molecular Function: ATP binding (GO:0005524);; Cellular Component: plasma membrane (GO:0005886);; Biological Process: protein phosphorylation (GO:0006468);; Cellular Component: integral component of membrane (GO:0016021);; Biological Process: recognition of pollen (GO:0048544);;	K02987|1.9e-08|gra:105766716|K02987 small subunit ribosomal protein S4e | (RefSeq) G-type lectin S-receptor-like serine/threonine-protein kinase SD1-13	Ribosome (ko03010)	--	--	D-mannose binding lectin	Putative G-type lectin S-receptor-like serine/threonine-protein kinase At1g61610 OS=Arabidopsis thaliana OX=3702 GN=At1g61610 PE=3 SV=1	T	Signal transduction mechanisms	PREDICTED: uncharacterized protein LOC103324607 [Prunus mume]	biological process: metabolic process (GO:0008152);; biological process: cellular process (GO:0009987);; molecular function: catalytic activity (GO:0003824);; molecular function: binding (GO:0005488);; cellular component: cell (GO:0005623);; cellular component: membrane (GO:0016020);; cellular component: cell part (GO:0044464);; cellular component: membrane part (GO:0044425);; biological process:…
PaF106G0100001469.01	PaF106G0100001469.01	11.0465	253	11.7291	242	10.4803	259	0	0	0	0	0	0	2.35384e-62	5.27221	up	up	up	up	1.51556e-64	up	2.35384e-62	5.27221	up	--	--	Molecular Function: nucleic acid binding (GO:0003676);; Biological Process: DNA integration (GO:0015074);;	K00284|1.1e-14|oeu:111379166|K00284 glutamate synthase (ferredoxin) [EC:1.4.7.1] | (RefSeq) ferredoxin-dependent glutamate synthase, chloroplastic-like	Glyoxylate and dicarboxylate metabolism (ko00630);; Nitrogen metabolism (ko00910)	[R]	General function prediction only	--	Retrovirus-related Pol polyprotein from transposon RE1 OS=Arabidopsis thaliana OX=3702 GN=RE1 PE=2 SV=1	L	Replication, recombination and repair	uncharacterized protein LOC110746340 [Prunus avium]	molecular function: binding (GO:0005488);; biological process: metabolic process (GO:0008152);; biological process: cellular process (GO:0009987)
PaF106G0100000940.01	PaF106G0100000940.01	0.415001	45	0.739199	74	0.698654	82	1.88255	218	2.00622	193	1.65742	187	5.34089e-08	-1.32306	down	down	down	down	6.32742e-09	down	5.34089e-08	-1.32306	down	--	--	Molecular Function: molecular_function (GO:0003674);; Molecular Function: nucleic acid binding (GO:0003676);; Molecular Function: RNA binding (GO:0003723);; Molecular Function: catalytic activity (GO:0003824);; Molecular Function: nuclease activity (GO:0004518);; Molecular Function: endonuclease activity (GO:0004519);; Molecular Function: binding (GO:0005488);; Cellular Component: cellular_compon…	K19090|1.8e-111|fve:101300361|K19090 CRISPR-associated protein Cas5t | (RefSeq) putative pentatricopeptide repeat-containing protein At3g05240	--	[R]	General function prediction only	PPR repeat family	Pentatricopeptide repeat-containing protein At2g34400 OS=Arabidopsis thaliana OX=3702 GN=PCMP-E23 PE=3 SV=2	S	Function unknown	PREDICTED: pentatricopeptide repeat-containing protein At2g34400 [Prunus mume]	molecular function: binding (GO:0005488);; molecular function: catalytic activity (GO:0003824);; biological process: metabolic process (GO:0008152);; biological process: cellular process (GO:0009987);; cellular component: cell (GO:0005623);; cellular component: cell part (GO:0044464);; cellular component: organelle (GO:0043226)
Prunus_sibirica_newGene_1925	--	0.984861	180	0.885613	151	0.908831	180	0.013357	3	0	0	0.052018	10	1.64698e-34	3.85099	up	up	up	up	2.89287e-36	up	1.64698e-34	3.85099	up	--	--	Molecular Function: nucleic acid binding (GO:0003676);; Molecular Function: RNA-DNA hybrid ribonuclease activity (GO:0004523);; Molecular Function: zinc ion binding (GO:0008270);;	K14677|2.3e-20|ghi:107892630|K14677 aminoacylase [EC:3.5.1.14] | (RefSeq) uncharacterized protein LOC107892630	Arginine biosynthesis (ko00220);; 2-Oxocarboxylic acid metabolism (ko01210);; Biosynthesis of amino acids (ko01230)	[R]	General function prediction only	--	--	L	Replication, recombination and repair	unnamed protein product [Prunus armeniaca]	molecular function: binding (GO:0005488);; biological process: metabolic process (GO:0008152);; biological process: cellular process (GO:0009987);; molecular function: catalytic activity (GO:0003824)
PaF106G0600025140.01	PaF106G0600025140.01	0.157576	7	0.087234	4	0.084779	4	1.68362	71	2.92793	103	2.71962	111	4.48778e-16	-2.78428	down	down	down	down	2.22378e-17	down	4.48778e-16	-2.78428	down	--	--	Molecular Function: molecular_function (GO:0003674);; Molecular Function: binding (GO:0005488);; Molecular Function: protein binding (GO:0005515);; Molecular Function: carbohydrate binding (GO:0030246);;	K17545|6.9e-34|zma:103634684|K17545 serine/threonine-protein kinase ULK4 [EC:2.7.11.1] | (RefSeq) uncharacterized protein LOC103634684	--	[R]	General function prediction only	Phloem protein 2	Retrovirus-related Pol polyprotein from transposon RE2 OS=Arabidopsis thaliana OX=3702 GN=RE2 PE=4 SV=1	S	Function unknown	uncharacterized protein LOC110768417 [Prunus avium]	molecular function: binding (GO:0005488)
PaF106G0700028092.01	PaF106G0700028092.01	4.13667	287	3.55275	230	3.467	262	1.93865	148	1.46206	93	1.21766	89	2.2886e-08	1.22208	up	up	up	up	2.5569e-09	up	2.2886e-08	1.22208	up	[R]	General function prediction only	Molecular Function: anaphase-promoting complex binding (GO:0010997);; Biological Process: cell division (GO:0051301);; Molecular Function: ubiquitin-protein transferase activator activity (GO:0097027);; Biological Process: positive regulation of ubiquitin protein ligase activity (GO:1904668);;	K03363|1.8e-259|pavi:110748657|K03363 cell division cycle 20, cofactor of APC complex | (RefSeq) cell division cycle 20.1, cofactor of APC complex-like	Ubiquitin mediated proteolysis (ko04120)	[DO]	Cell cycle control, cell division, chromosome partitioning;; Posttranslational modification, protein turnover, chaperones	WD domain, G-beta repeat	Cell division cycle 20.1, cofactor of APC complex OS=Arabidopsis thaliana OX=3702 GN=CDC20-1 PE=1 SV=1	--	--	unnamed protein product [Prunus armeniaca]	molecular function: binding (GO:0005488);; biological process: cellular process (GO:0009987);; biological process: single-organism process (GO:0044699);; biological process: biological regulation (GO:0065007);; molecular function: molecular function regulator (GO:0098772)
PaF106G0100006453.01	PaF106G0100006453.01	0.10878	11	0.169837	16	0.265886	29	1.4722	158	1.40326	126	0.63438	66	1.84528e-08	-1.89295	down	down	down	down	2.03974e-09	down	1.84528e-08	-1.89295	down	[P]	Inorganic ion transport and metabolism	Cellular Component: integral component of plasma membrane (GO:0005887);; Molecular Function: secondary active sulfate transmembrane transporter activity (GO:0008271);; Molecular Function: anion:anion antiporter activity (GO:0015301);;	K17470|0.0e+00|pmum:103319166|K17470 sulfate transporter 1, high-affinity | (RefSeq) sulfate transporter 1.3-like	--	[P]	Inorganic ion transport and metabolism	Sulfate permease family	Sulfate transporter 1.3 OS=Arabidopsis thaliana OX=3702 GN=SULTR1;3 PE=2 SV=1	P	Inorganic ion transport and metabolism	unnamed protein product [Prunus armeniaca]	cellular component: cell (GO:0005623);; cellular component: membrane (GO:0016020);; cellular component: membrane part (GO:0044425);; cellular component: cell part (GO:0044464);; biological process: single-organism process (GO:0044699);; biological process: localization (GO:0051179);; molecular function: transporter activity (GO:0005215)
PaF106G0600025621.01	PaF106G0600025621.01	9.86981	630	12.9095	785	13.8542	981	3.97517	281	3.47447	206	3.22344	226	2.39411e-30	1.7524	up	up	up	up	4.9944e-32	up	2.39411e-30	1.7524	up	--	--	Molecular Function: transcription factor activity, sequence-specific DNA binding (GO:0003700);;	K09060|1.6e-06|dcr:108209394|K09060 plant G-box-binding factor | (RefSeq) bZIP transcription factor 16-like	--	--	--	Basic leucine-zipper C terminal	Light-inducible protein CPRF2 OS=Petroselinum crispum OX=4043 GN=CPRF2 PE=2 SV=2	K	Transcription	unnamed protein product [Prunus armeniaca]	biological process: biological regulation (GO:0065007);; molecular function: nucleic acid binding transcription factor activity (GO:0001071)
PaF106G0800031599.01	PaF106G0800031599.01	6.19651	234	6.31591	229	7.13424	291	3.85337	153	2.89354	93	1.65102	69	6.62819e-07	1.20513	up	up	up	up	9.47762e-08	up	6.62819e-07	1.20513	up	--	--	Biological Process: response to auxin (GO:0009733);;	K14488|1.1e-46|pavi:110745503|K14488 SAUR family protein | (RefSeq) indole-3-acetic acid-induced protein ARG7-like	Plant hormone signal transduction (ko04075)	--	--	Auxin responsive protein	Indole-3-acetic acid-induced protein ARG7 OS=Vigna radiata var. radiata OX=3916 GN=ARG7 PE=2 SV=1	--	--	indole-3-acetic acid-induced protein ARG7 [Prunus persica]	biological process: response to stimulus (GO:0050896)
PaF106G0200006848.01	PaF106G0200006848.01	2.90844	375	3.33485	401	2.94779	414	14.3746	2017	12.851	1507	13.9237	1894	2.79651e-77	-2.04203	down	down	down	down	1.38284e-79	down	2.79651e-77	-2.04203	down	--	--	Molecular Function: oxidoreductase activity, acting on single donors with incorporation of molecular oxygen, incorporation of two atoms of oxygen (GO:0016702);; Biological Process: oxylipin biosynthetic process (GO:0031408);; Molecular Function: metal ion binding (GO:0046872);;	K00454|0.0e+00|pmum:103330513|K00454 lipoxygenase [EC:1.13.11.12] | (RefSeq) linoleate 13S-lipoxygenase 2-1, chloroplastic-like	Linoleic acid metabolism (ko00591);; alpha-Linolenic acid metabolism (ko00592)	--	--	Lipoxygenase	Linoleate 13S-lipoxygenase 2-1, chloroplastic OS=Solanum tuberosum OX=4113 GN=LOX2.1 PE=1 SV=1	E	Amino acid transport and metabolism	PREDICTED: linoleate 13S-lipoxygenase 2-1, chloroplastic-like [Prunus mume]	biological process: metabolic process (GO:0008152);; biological process: single-organism process (GO:0044699);; molecular function: catalytic activity (GO:0003824);; biological process: cellular process (GO:0009987);; molecular function: binding (GO:0005488)
PaF106G0200008354.01	PaF106G0200008354.01	1.7599	221	1.97258	254	1.70033	210	0.290944	49	0.293786	34	0.162073	27	9.79627e-22	2.38816	up	up	up	up	3.40099e-23	up	9.79627e-22	2.38816	up	[R]	General function prediction only	Biological Process: signal transduction (GO:0007165);; Molecular Function: ADP binding (GO:0043531);;	K00695|1.1e-114|mtr:MTR_6g478030|K00695 sucrose synthase [EC:2.4.1.13] | (RefSeq) sucrose synthase	Starch and sucrose metabolism (ko00500)	--	--	TIR domain	Disease resistance protein RUN1 OS=Vitis rotundifolia OX=103349 GN=RUN1 PE=1 SV=1	S	Function unknown	TMV resistance protein N isoform X1 [Prunus persica]	biological process: cellular process (GO:0009987);; biological process: biological regulation (GO:0065007);; molecular function: binding (GO:0005488)
PaF106G0300012314.01	PaF106G0300012314.01	1.70513	123	2.5409	171	2.60318	204	1.14978	91	0.750265	50	0.437414	34	6.60228e-06	1.3273	up	up	up	up	1.13144e-06	up	6.60228e-06	1.3273	up	[G]	Carbohydrate transport and metabolism	Molecular Function: UDP-glycosyltransferase activity (GO:0008194);; Cellular Component: intracellular membrane-bounded organelle (GO:0043231);; Molecular Function: quercetin 3-O-glucosyltransferase activity (GO:0080043);; Molecular Function: quercetin 7-O-glucosyltransferase activity (GO:0080044);;	K22706|2.3e-127|pmum:103319663|K22706 (R)-mandelonitrile beta-glucosyltransferase [EC:2.4.1.354] | (RefSeq) 7-deoxyloganetin glucosyltransferase-like	Cyanoamino acid metabolism (ko00460)	[GC]	Carbohydrate transport and metabolism;; Energy production and conversion	UDP-glucoronosyl and UDP-glucosyl transferase	7-deoxyloganetin glucosyltransferase OS=Gardenia jasminoides OX=114476 GN=UGT85A24 PE=1 SV=1	--	--	PREDICTED: 7-deoxyloganetin glucosyltransferase-like [Prunus mume]	molecular function: catalytic activity (GO:0003824);; cellular component: cell (GO:0005623);; cellular component: organelle (GO:0043226);; cellular component: cell part (GO:0044464)
PaF106G0300012568.01	PaF106G0300012568.01	14.2957	2095	20.03	2734	18.3598	2927	8.76099	1401	9.09988	1208	8.34185	1288	1.11295e-19	1.05383	up	up	up	up	4.31675e-21	up	1.11295e-19	1.05383	up	[S]	Function unknown	Molecular Function: protein kinase activity (GO:0004672);; Molecular Function: ATP binding (GO:0005524);; Cellular Component: integral component of membrane (GO:0016021);;	K10406|4.7e-08|smo:SELMODRAFT_105488|K10406 kinesin family member C2/C3 | (RefSeq) hypothetical protein	--	--	--	Malectin domain	Probable LRR receptor-like serine/threonine-protein kinase At1g07650 OS=Arabidopsis thaliana OX=3702 GN=At1g07650 PE=1 SV=1	T	Signal transduction mechanisms	probable LRR receptor-like serine/threonine-protein kinase At1g07650 isoform X1 [Prunus avium]	biological process: metabolic process (GO:0008152);; biological process: cellular process (GO:0009987);; molecular function: catalytic activity (GO:0003824);; molecular function: binding (GO:0005488);; cellular component: membrane (GO:0016020);; cellular component: membrane part (GO:0044425)
PaF106G0500020819.01	PaF106G0500020819.01	12.2921	432	12.0922	396	13.1086	501	4.09962	157	5.61129	180	5.16855	192	2.1481e-15	1.33163	up	up	up	up	1.13413e-16	up	2.1481e-15	1.33163	up	[T]	Signal transduction mechanisms	Biological Process: phosphorelay signal transduction system (GO:0000160);;	K12127|7.9e-37|hbr:110635669|K12127 pseudo-response regulator 1 | (RefSeq) two-component response regulator-like APRR1	Circadian rhythm - plant (ko04712)	[K]	Transcription	Response regulator receiver domain	Two-component response regulator-like APRR1 OS=Arabidopsis thaliana OX=3702 GN=APRR1 PE=1 SV=1	K	Transcription	unnamed protein product [Prunus armeniaca]	biological process: cellular process (GO:0009987);; biological process: signaling (GO:0023052);; biological process: single-organism process (GO:0044699);; biological process: response to stimulus (GO:0050896);; biological process: biological regulation (GO:0065007)
PaF106G0100003015.01	PaF106G0100003015.01	0.229105	15	0.099745	6	0.390416	27	3.71089	257	1.71054	99	2.88353	194	1.93769e-15	-2.56326	down	down	down	down	1.01506e-16	down	1.93769e-15	-2.56326	down	[G]	Carbohydrate transport and metabolism	Molecular Function: polygalacturonase activity (GO:0004650);; Cellular Component: extracellular region (GO:0005576);; Biological Process: carbohydrate metabolic process (GO:0005975);; Biological Process: cell wall organization (GO:0071555);;	K01213|1.7e-263|pmum:103321801|K01213 galacturan 1,4-alpha-galacturonidase [EC:3.2.1.67] | (RefSeq) polygalacturonase At1g48100	Pentose and glucuronate interconversions (ko00040)	--	--	Glycosyl hydrolases family 28	Polygalacturonase At1g48100 OS=Arabidopsis thaliana OX=3702 GN=At1g48100 PE=2 SV=1	G	Carbohydrate transport and metabolism	PREDICTED: polygalacturonase At1g48100 [Prunus mume]	molecular function: catalytic activity (GO:0003824);; cellular component: extracellular region (GO:0005576);; biological process: metabolic process (GO:0008152);; biological process: cellular process (GO:0009987);; biological process: cellular component organization or biogenesis (GO:0071840)
PaF106G0800032198.01	PaF106G0800032198.01	5.15953	420	6.69007	500	7.4682	645	0.310076	30	0.275807	23	0.389722	37	9.18526e-75	3.81203	up	up	up	up	4.68395e-77	up	9.18526e-75	3.81203	up	--	--	Cellular Component: plasma membrane (GO:0005886);; Cellular Component: integral component of membrane (GO:0016021);;	--	--	--	--	Leucine rich repeat	--	T	Signal transduction mechanisms	PREDICTED: leucine-rich repeat receptor protein kinase EMS1-like [Prunus mume]	cellular component: cell (GO:0005623);; cellular component: membrane (GO:0016020);; cellular component: cell part (GO:0044464);; cellular component: membrane part (GO:0044425)
PaF106G0300012164.01	PaF106G0300012164.01	11.3062	1390	10.578	1213	10.5277	1407	86.0517	11510	58.9966	6594	61.21	7937	2.06522e-89	-2.51411	down	down	down	down	7.76559e-92	down	2.06522e-89	-2.51411	down	[G]	Carbohydrate transport and metabolism	Molecular Function: polygalacturonase activity (GO:0004650);; Cellular Component: extracellular region (GO:0005576);; Biological Process: carbohydrate metabolic process (GO:0005975);; Biological Process: cell wall organization (GO:0071555);;	K01213|3.9e-232|pmum:103343818|K01213 galacturan 1,4-alpha-galacturonidase [EC:3.2.1.67] | (RefSeq) exopolygalacturonase clone GBGA483-like	Pentose and glucuronate interconversions (ko00040)	--	--	Glycosyl hydrolases family 28	Exopolygalacturonase clone GBGA483 OS=Arabidopsis thaliana OX=3702 GN=At3g07850 PE=2 SV=2	G	Carbohydrate transport and metabolism	PREDICTED: exopolygalacturonase clone GBGA483-like [Prunus mume]	molecular function: catalytic activity (GO:0003824);; cellular component: extracellular region (GO:0005576);; biological process: metabolic process (GO:0008152);; biological process: cellular process (GO:0009987);; biological process: cellular component organization or biogenesis (GO:0071840)
PaF106G0700027867.01	PaF106G0700027867.01	5.98439	410	5.51944	353	5.44109	405	0.16029	12	0.380002	24	0.053763	4	1.48099e-12	2.64438	up	up	up	up	9.88648e-14	up	1.48099e-12	2.64438	up	--	--	Molecular Function: nucleic acid binding (GO:0003676);; Biological Process: DNA integration (GO:0015074);;	K03283|1.5e-21|pmum:103341772|K03283 heat shock 70kDa protein 1/2/6/8 | (RefSeq) heat shock 70 kDa protein 18-like	Spliceosome (ko03040);; Protein processing in endoplasmic reticulum (ko04141);; Endocytosis (ko04144)	[R]	General function prediction only	gag-polypeptide of LTR copia-type	Retrovirus-related Pol polyprotein from transposon RE1 OS=Arabidopsis thaliana OX=3702 GN=RE1 PE=2 SV=1	L	Replication, recombination and repair	hypothetical protein Prudu_489S000400 [Prunus dulcis]	molecular function: binding (GO:0005488);; biological process: metabolic process (GO:0008152);; biological process: cellular process (GO:0009987)
PaF106G0500020327.01	PaF106G0500020327.01	43.6707	2802	38.8867	2326	43.7213	3049	103.334	7215	87.2096	5088	107.867	7302	3.91998e-28	-1.14539	down	down	down	down	9.066e-30	down	3.91998e-28	-1.14539	down	[IR]	Lipid transport and metabolism;; General function prediction only	Molecular Function: hydrolase activity, acting on ester bonds (GO:0016788);;	K01206|1.5e-39|boe:106299976|K01206 alpha-L-fucosidase [EC:3.2.1.51] | (RefSeq) alpha-L-fucosidase 3	Other glycan degradation (ko00511)	--	--	GDSL-like Lipase/Acylhydrolase	GDSL esterase/lipase At3g48460 OS=Arabidopsis thaliana OX=3702 GN=At3g48460 PE=2 SV=1	S	Function unknown	unnamed protein product [Prunus armeniaca]	molecular function: catalytic activity (GO:0003824)
PaF106G0100004692.01	PaF106G0100004692.01	1.24952	164	2.26063	276	1.9676	280	0.423964	61	0.683241	82	0.523706	73	4.41534e-10	1.58084	up	up	up	up	3.90498e-11	up	4.41534e-10	1.58084	up	[ET]	Amino acid transport and metabolism;; Signal transduction mechanisms	Molecular Function: G-protein coupled receptor activity (GO:0004930);; Molecular Function: ligand-gated ion channel activity (GO:0015276);; Cellular Component: integral component of membrane (GO:0016021);;	K05387|0.0e+00|pmum:103320682|K05387 glutamate receptor, ionotropic, plant | (RefSeq) glutamate receptor 2.8-like	--	[PET]	Inorganic ion transport and metabolism;; Amino acid transport and metabolism;; Signal transduction mechanisms	Receptor family ligand binding region	Glutamate receptor 2.8 OS=Arabidopsis thaliana OX=3702 GN=GLR2.8 PE=2 SV=2	--	--	glutamate receptor 2.8-like [Prunus dulcis]	biological process: cellular process (GO:0009987);; biological process: signaling (GO:0023052);; biological process: single-organism process (GO:0044699);; biological process: response to stimulus (GO:0050896);; biological process: biological regulation (GO:0065007);; molecular function: signal transducer activity (GO:0004871);; molecular function: molecular transducer activity (GO:0060089);; bio…
PaF106G0400014719.01	PaF106G0400014719.01	4.1025	775	3.5824	631	3.98012	817	0.697552	144	0.779283	134	0.819279	164	2.89106e-56	2.31411	up	up	up	up	2.32309e-58	up	2.89106e-56	2.31411	up	[R]	General function prediction only	Biological Process: signal transduction (GO:0007165);; Molecular Function: ADP binding (GO:0043531);;	K00695|2.7e-157|mtr:MTR_6g478030|K00695 sucrose synthase [EC:2.4.1.13] | (RefSeq) sucrose synthase	Starch and sucrose metabolism (ko00500)	--	--	TIR domain	Disease resistance protein Roq1 OS=Nicotiana benthamiana OX=4100 GN=ROQ1 PE=1 SV=1	--	--	PREDICTED: disease resistance protein TAO1-like [Prunus mume]	biological process: cellular process (GO:0009987);; biological process: biological regulation (GO:0065007);; molecular function: binding (GO:0005488)
PaF106G0300012156.01	PaF106G0300012156.01	0.14804	6	0.557596	19	0.4858	19	5.52118	209	4.18468	133	4.5179	166	3.0518e-20	-2.72868	down	down	down	down	1.14753e-21	down	3.0518e-20	-2.72868	down	--	--	Molecular Function: polygalacturonase activity (GO:0004650);; Cellular Component: cellular_component (GO:0005575);; Cellular Component: extracellular region (GO:0005576);; Cellular Component: cell wall (GO:0005618);; Cellular Component: cell (GO:0005623);; Biological Process: carbohydrate metabolic process (GO:0005975);; Cellular Component: external encapsulating structure (GO:0030312);; Cellular…	K01213|6.2e-50|pper:109947835|K01213 galacturan 1,4-alpha-galacturonidase [EC:3.2.1.67] | (RefSeq) exopolygalacturonase-like	Pentose and glucuronate interconversions (ko00040)	--	--	Glycosyl hydrolases family 28	Exopolygalacturonase (Fragment) OS=Oenothera organensis OX=3945 PE=2 SV=1	G	Carbohydrate transport and metabolism	exopolygalacturonase-like [Prunus persica]	molecular function: catalytic activity (GO:0003824);; cellular component: extracellular region (GO:0005576);; cellular component: cell (GO:0005623);; cellular component: cell part (GO:0044464);; biological process: metabolic process (GO:0008152);; biological process: cellular process (GO:0009987);; biological process: cellular component organization or biogenesis (GO:0071840)
PaF106G0600024494.01	PaF106G0600024494.01	1.76211	259	2.06239	276	2.05746	325	0.599722	96	0.551758	74	0.726116	103	2.58257e-17	1.62238	up	up	up	up	1.16398e-18	up	2.58257e-17	1.62238	up	[M]	Cell wall/membrane/envelope biogenesis	Molecular Function: protein serine/threonine kinase activity (GO:0004674);; Molecular Function: ATP binding (GO:0005524);; Cellular Component: integral component of membrane (GO:0016021);;	K20181|2.9e-98|mtr:MTR_5g026090|K20181 vacuolar protein sorting-associated protein 18 | (RefSeq) vacuolar sorting-associated-like protein	--	--	--	Protein kinase domain	Probable LRR receptor-like serine/threonine-protein kinase At3g47570 OS=Arabidopsis thaliana OX=3702 GN=At3g47570 PE=2 SV=1	T	Signal transduction mechanisms	probable LRR receptor-like serine/threonine-protein kinase At3g47570 [Prunus dulcis]	biological process: metabolic process (GO:0008152);; biological process: cellular process (GO:0009987);; molecular function: catalytic activity (GO:0003824);; molecular function: binding (GO:0005488);; cellular component: membrane (GO:0016020);; cellular component: membrane part (GO:0044425)
PaF106G0700028053.01	PaF106G0700028053.01	65.1422	6672	64.0998	6073	72.9642	8066	35.9252	3910	33.5066	3149	36.2093	3822	8.93473e-41	1.00946	up	up	up	up	1.22879e-42	up	8.93473e-41	1.00946	up	[V]	Defense mechanisms	Molecular Function: ATP binding (GO:0005524);; Cellular Component: integral component of membrane (GO:0016021);; Molecular Function: ATPase activity (GO:0016887);;	K05681|5.6e-160|nsy:104217879|K05681 ATP-binding cassette, subfamily G (WHITE), member 2 | (RefSeq) ABC transporter G family member 9-like	ABC transporters (ko02010)	[Q]	Secondary metabolites biosynthesis, transport and catabolism	ABC-2 type transporter	ABC transporter G family member 22 OS=Arabidopsis thaliana OX=3702 GN=ABCG22 PE=1 SV=1	Q	Secondary metabolites biosynthesis, transport and catabolism	unnamed protein product [Prunus armeniaca]	molecular function: binding (GO:0005488);; cellular component: membrane (GO:0016020);; cellular component: membrane part (GO:0044425);; molecular function: catalytic activity (GO:0003824)
Prunus_sibirica_newGene_2042	--	0.042594	10	0.047801	10	0.035936	9	1.69088	397	1.38633	272	1.2984	296	5.74227e-57	-4.13351	down	down	down	down	4.40712e-59	down	5.74227e-57	-4.13351	down	--	--	--	K19525|2.5e-47|dct:110098611|K19525 vacuolar protein sorting-associated protein 13A/C | (RefSeq) uncharacterized protein LOC110098611	--	[R]	General function prediction only	RNase H-like domain found in reverse transcriptase	--	O	Posttranslational modification, protein turnover, chaperones	hypothetical protein Prudu_013621 [Prunus dulcis]	--
PaF106G0400017987.01	PaF106G0400017987.01	3.81083	429	2.89561	304	4.28041	524	0.584305	72	0.773602	80	0.617077	74	3.1563e-31	2.33716	up	up	up	up	6.25927e-33	up	3.1563e-31	2.33716	up	[M]	Cell wall/membrane/envelope biogenesis	Molecular Function: protein serine/threonine kinase activity (GO:0004674);; Molecular Function: ATP binding (GO:0005524);; Cellular Component: integral component of membrane (GO:0016021);; Biological Process: recognition of pollen (GO:0048544);;	K24104|9.3e-82|thj:104799061|K24104 GPN-loop GTPase | (RefSeq) LOW QUALITY PROTEIN: uncharacterized protein LOC104799061	--	--	--	Protein tyrosine and serine/threonine kinase	G-type lectin S-receptor-like serine/threonine-protein kinase At1g11410 OS=Arabidopsis thaliana OX=3702 GN=At1g11410 PE=3 SV=3	T	Signal transduction mechanisms	unnamed protein product [Prunus armeniaca]	biological process: metabolic process (GO:0008152);; biological process: cellular process (GO:0009987);; molecular function: catalytic activity (GO:0003824);; molecular function: binding (GO:0005488);; cellular component: membrane (GO:0016020);; cellular component: membrane part (GO:0044425);; biological process: reproduction (GO:0000003);; biological process: reproductive process (GO:0022414);; …
Prunus_sibirica_newGene_398	--	0.397917	68	0.559713	89	0.448595	83	3.33616	606	2.50609	386	2.26172	400	4.64121e-29	-2.23906	down	down	down	down	1.01842e-30	down	4.64121e-29	-2.23906	down	--	--	--	--	--	--	--	zinc-binding in reverse transcriptase	--	L	Replication, recombination and repair	hypothetical protein PRUPE_3G120300 [Prunus persica]	--
PaF106G0800032573.01	PaF106G0800032573.01	4.48139	242	3.27611	176	3.73951	232	0.972167	65	1.0827	57	0.919368	59	3.49202e-15	1.74498	up	up	up	up	1.86706e-16	up	3.49202e-15	1.74498	up	[P]	Inorganic ion transport and metabolism	Molecular Function: carbonate dehydratase activity (GO:0004089);; Molecular Function: zinc ion binding (GO:0008270);; Biological Process: cyanate catabolic process (GO:0009440);; Biological Process: carbon utilization (GO:0015976);;	K01673|2.9e-145|pmum:103341853|K01673 carbonic anhydrase [EC:4.2.1.1] | (RefSeq) carbonic anhydrase 2-like	Nitrogen metabolism (ko00910)	[P]	Inorganic ion transport and metabolism	Carbonic anhydrase	Carbonic anhydrase, chloroplastic OS=Nicotiana tabacum OX=4097 PE=2 SV=1	P	Inorganic ion transport and metabolism	PREDICTED: carbonic anhydrase 2-like [Prunus mume]	molecular function: catalytic activity (GO:0003824);; molecular function: binding (GO:0005488);; biological process: metabolic process (GO:0008152);; biological process: cellular process (GO:0009987);; biological process: single-organism process (GO:0044699)
PaF106G0100004813.01	PaF106G0100004813.01	1.38973	101	2.80303	190	2.20357	174	0.337386	27	0.715544	48	0.60312	47	9.74346e-08	1.61518	up	up	up	up	1.20802e-08	up	9.74346e-08	1.61518	up	[QV]	Secondary metabolites biosynthesis, transport and catabolism;; Defense mechanisms	Molecular Function: monooxygenase activity (GO:0004497);; Molecular Function: iron ion binding (GO:0005506);; Cellular Component: integral component of membrane (GO:0016021);; Molecular Function: oxidoreductase activity, acting on paired donors, with incorporation or reduction of molecular oxygen (GO:0016705);; Molecular Function: heme binding (GO:0020037);;	K20771|3.5e-305|pmum:103320572|K20771 carlactone C-19 oxidase [EC:1.14.-.-] | (RefSeq) cytochrome P450 711A1-like isoform X1	--	[Q]	Secondary metabolites biosynthesis, transport and catabolism	Cytochrome P450	Cytochrome P450 711A1 OS=Arabidopsis thaliana OX=3702 GN=CYP711A1 PE=2 SV=1	Q	Secondary metabolites biosynthesis, transport and catabolism	unnamed protein product [Prunus armeniaca]	biological process: metabolic process (GO:0008152);; biological process: single-organism process (GO:0044699);; molecular function: catalytic activity (GO:0003824);; molecular function: binding (GO:0005488);; cellular component: membrane (GO:0016020);; cellular component: membrane part (GO:0044425)
PaF106G0200006845.01	PaF106G0200006845.01	8.15415	996	12.1085	1144	16.1029	2110	81.7115	10874	86.7786	9920	83.9818	11150	3.71219e-24	-2.49726	down	down	down	down	1.09565e-25	down	3.71219e-24	-2.49726	down	--	--	Molecular Function: oxidoreductase activity, acting on single donors with incorporation of molecular oxygen, incorporation of two atoms of oxygen (GO:0016702);; Biological Process: oxylipin biosynthetic process (GO:0031408);; Biological Process: lipid oxidation (GO:0034440);; Molecular Function: metal ion binding (GO:0046872);;	K00454|0.0e+00|pper:18787524|K00454 lipoxygenase [EC:1.13.11.12] | (RefSeq) linoleate 13S-lipoxygenase 2-1, chloroplastic	Linoleic acid metabolism (ko00591);; alpha-Linolenic acid metabolism (ko00592)	--	--	Lipoxygenase	Linoleate 13S-lipoxygenase 2-1, chloroplastic OS=Solanum tuberosum OX=4113 GN=LOX2.1 PE=1 SV=1	E	Amino acid transport and metabolism	linoleate 13S-lipoxygenase 2-1, chloroplastic [Prunus persica]	biological process: metabolic process (GO:0008152);; biological process: single-organism process (GO:0044699);; molecular function: catalytic activity (GO:0003824);; biological process: cellular process (GO:0009987);; molecular function: binding (GO:0005488)
PaF106G0700027901.01	PaF106G0700027901.01	0.280709	17	0.705609	40	0.693125	46	7.12764	466	7.117	389	5.37845	341	6.08301e-37	-3.03521	down	down	down	down	9.49393e-39	down	6.08301e-37	-3.03521	down	[Q]	Secondary metabolites biosynthesis, transport and catabolism	Molecular Function: oxidoreductase activity (GO:0016491);; Molecular Function: metal ion binding (GO:0046872);;	K13229|1.3e-80|ats:109766943|K13229 2,4-dihydroxy-1,4-benzoxazin-3-one-glucoside dioxygenase [EC:1.14.11.59] | (RefSeq) LOC109766943; DIBOA-glucoside dioxygenase BX6-like	Benzoxazinoid biosynthesis (ko00402)	[QR]	Secondary metabolites biosynthesis, transport and catabolism;; General function prediction only	2OG-Fe(II) oxygenase superfamily	1-aminocyclopropane-1-carboxylate oxidase homolog 4 OS=Arabidopsis thaliana OX=3702 GN=At1g03400 PE=2 SV=1	Q	Secondary metabolites biosynthesis, transport and catabolism	PREDICTED: 1-aminocyclopropane-1-carboxylate oxidase homolog 4-like [Prunus mume]	molecular function: catalytic activity (GO:0003824);; molecular function: binding (GO:0005488)
PaF106G0800030158.01	PaF106G0800030158.01	6.98635	265	6.92753	245	6.29691	260	2.10332	87	1.99525	69	1.85897	75	2.32573e-17	1.69141	up	up	up	up	1.04702e-18	up	2.32573e-17	1.69141	up	--	--	Molecular Function: hydrolase activity, hydrolyzing O-glycosyl compounds (GO:0004553);; Cellular Component: cell wall (GO:0005618);; Biological Process: xyloglucan metabolic process (GO:0010411);; Molecular Function: xyloglucan:xyloglucosyl transferase activity (GO:0016762);; Biological Process: cell wall biogenesis (GO:0042546);; Cellular Component: apoplast (GO:0048046);; Biological Process: ce…	K08235|1.5e-27|pper:18767234|K08235 xyloglucan:xyloglucosyl transferase [EC:2.4.1.207] | (RefSeq) xyloglucan endotransglucosylase/hydrolase protein 2	--	--	--	Glycosyl hydrolases family 16	Xyloglucan endotransglucosylase/hydrolase protein 2 OS=Arabidopsis thaliana OX=3702 GN=XTH2 PE=2 SV=1	G	Carbohydrate transport and metabolism	xyloglucan endotransglucosylase/hydrolase protein 2-like isoform X1 [Prunus dulcis]	molecular function: catalytic activity (GO:0003824);; cellular component: cell (GO:0005623);; cellular component: cell part (GO:0044464);; biological process: metabolic process (GO:0008152);; biological process: cellular process (GO:0009987);; biological process: cellular component organization or biogenesis (GO:0071840);; cellular component: extracellular region (GO:0005576)
PaF106G0100002461.01	PaF106G0100002461.01	1.91114	271	2.3239	306	2.45294	377	0.973358	150	0.94571	122	1.22957	184	2.57921e-08	1.07298	up	up	up	up	2.9055e-09	up	2.57921e-08	1.07298	up	[L]	Replication, recombination and repair	Molecular Function: helicase activity (GO:0004386);;	K10706|2.2e-195|rcu:8277867|K10706 senataxin [EC:3.6.4.-] | (RefSeq) probable helicase senataxin isoform X1	--	[A]	RNA processing and modification	AAA domain	Regulator of nonsense transcripts 1 homolog OS=Arabidopsis thaliana OX=3702 GN=UPF1 PE=1 SV=2	A	RNA processing and modification	helicase SEN1-like [Prunus dulcis]	molecular function: catalytic activity (GO:0003824)
PaF106G0100001908.01	PaF106G0100001908.01	3.43758	109	2.83529	86	3.77605	133	6.7819	237	6.94909	204	9.00097	305	4.44447e-06	-1.00903	down	down	down	down	7.38761e-07	down	4.44447e-06	-1.00903	down	--	--	Cellular Component: plasmodesma (GO:0009506);; Biological Process: calcium-mediated signaling (GO:0019722);;	--	--	--	--	Rapid ALkalinization Factor (RALF)	Protein RALF-like 24 OS=Arabidopsis thaliana OX=3702 GN=RALFL24 PE=3 SV=1	S	Function unknown	LOW QUALITY PROTEIN: protein RALF-like 24 [Prunus persica]	cellular component: cell junction (GO:0030054);; biological process: cellular process (GO:0009987);; biological process: signaling (GO:0023052);; biological process: single-organism process (GO:0044699);; biological process: response to stimulus (GO:0050896);; biological process: biological regulation (GO:0065007)
PaF106G0200008171.01	PaF106G0200008171.01	1.78698	181	1.89952	178	1.16217	127	0.01894	3	0	0	0	0	9.08198e-38	4.28174	up	up	up	up	1.37535e-39	up	9.08198e-38	4.28174	up	[ET]	Amino acid transport and metabolism;; Signal transduction mechanisms	Cellular Component: plasma membrane (GO:0005886);; Molecular Function: ligand-gated ion channel activity (GO:0015276);; Cellular Component: integral component of membrane (GO:0016021);; Molecular Function: signaling receptor activity (GO:0038023);;	K05387|1.0e-238|pavi:110769760|K05387 glutamate receptor, ionotropic, plant | (RefSeq) glutamate receptor 1.4-like	--	[PET]	Inorganic ion transport and metabolism;; Amino acid transport and metabolism;; Signal transduction mechanisms	Ligand-gated ion channel	Glutamate receptor 1.4 OS=Arabidopsis thaliana OX=3702 GN=GLR1.4 PE=2 SV=2	--	--	unnamed protein product [Prunus armeniaca]	cellular component: cell (GO:0005623);; cellular component: membrane (GO:0016020);; cellular component: cell part (GO:0044464);; biological process: localization (GO:0051179);; molecular function: transporter activity (GO:0005215);; molecular function: molecular transducer activity (GO:0060089);; cellular component: membrane part (GO:0044425);; biological process: cellular process (GO:0009987);; …
PaF106G0400016611.01	PaF106G0400016611.01	2.55083	282	1.95257	201	1.99266	239	9.09788	1092	13.2923	1333	13.0784	1521	1.77246e-39	-2.23778	down	down	down	down	2.59287e-41	down	1.77246e-39	-2.23778	down	[M]	Cell wall/membrane/envelope biogenesis	Molecular Function: protein serine/threonine kinase activity (GO:0004674);; Molecular Function: ATP binding (GO:0005524);; Cellular Component: plasma membrane (GO:0005886);; Biological Process: protein phosphorylation (GO:0006468);; Cellular Component: integral component of membrane (GO:0016021);; Biological Process: recognition of pollen (GO:0048544);;	K24104|5.0e-69|thj:104799061|K24104 GPN-loop GTPase | (RefSeq) LOW QUALITY PROTEIN: uncharacterized protein LOC104799061	--	--	--	Protein tyrosine and serine/threonine kinase	G-type lectin S-receptor-like serine/threonine-protein kinase At4g27290 OS=Arabidopsis thaliana OX=3702 GN=At4g27290 PE=3 SV=4	T	Signal transduction mechanisms	G-type lectin S-receptor-like serine/threonine-protein kinase At4g27290 isoform X1 [Prunus persica]	biological process: metabolic process (GO:0008152);; biological process: cellular process (GO:0009987);; molecular function: catalytic activity (GO:0003824);; molecular function: binding (GO:0005488);; cellular component: cell (GO:0005623);; cellular component: membrane (GO:0016020);; cellular component: cell part (GO:0044464);; cellular component: membrane part (GO:0044425);; biological process:…
PaF106G0600024083.01	PaF106G0600024083.01	0.092627	6	0.056776	4	0.238598	17	1.10149	75	1.23455	71	1.14105	76	8.12232e-09	-2.03383	down	down	down	down	8.5059e-10	down	8.12232e-09	-2.03383	down	--	--	Molecular Function: UDP-glycosyltransferase activity (GO:0008194);; Cellular Component: intracellular membrane-bounded organelle (GO:0043231);; Molecular Function: quercetin 3-O-glucosyltransferase activity (GO:0080043);; Molecular Function: quercetin 7-O-glucosyltransferase activity (GO:0080044);;	K13691|1.1e-273|pper:18775379|K13691 pathogen-inducible salicylic acid glucosyltransferase [EC:2.4.1.-] | (RefSeq) UDP-glycosyltransferase 74F2 isoform X1	--	[GC]	Carbohydrate transport and metabolism;; Energy production and conversion	UDP-glucoronosyl and UDP-glucosyl transferase	UDP-glycosyltransferase 74F2 OS=Arabidopsis thaliana OX=3702 GN=UGT74F2 PE=1 SV=1	--	--	unnamed protein product [Prunus armeniaca]	molecular function: catalytic activity (GO:0003824);; cellular component: cell (GO:0005623);; cellular component: organelle (GO:0043226);; cellular component: cell part (GO:0044464)
PaF106G0200009202.01	PaF106G0200009202.01	2.71419	113	2.17407	85	3.14022	142	0.683497	31	0.78794	30	0.693367	31	6.05068e-09	1.63884	up	up	up	up	6.23643e-10	up	6.05068e-09	1.63884	up	--	--	--	--	--	--	--	gag-polypeptide of LTR copia-type	--	S	Function unknown	uncharacterized protein LOC18787186 [Prunus persica]	--
PaF106G0600022540.01	PaF106G0600022540.01	14.2554	1267	22.5922	1872	21.7298	2099	6.1811	596	6.88763	557	5.0355	468	1.1024e-26	1.6876	up	up	up	up	2.78241e-28	up	1.1024e-26	1.6876	up	--	--	Molecular Function: calmodulin binding (GO:0005516);; Biological Process: defense response (GO:0006952);; Biological Process: response to biotic stimulus (GO:0009607);; Cellular Component: integral component of membrane (GO:0016021);;	K08472|0.0e+00|pper:18773580|K08472 mlo protein | (RefSeq) MLO-like protein 6	--	--	--	Mlo family	MLO-like protein 6 OS=Arabidopsis thaliana OX=3702 GN=MLO6 PE=2 SV=2	G	Carbohydrate transport and metabolism	MLO1 [Prunus armeniaca]	molecular function: binding (GO:0005488);; biological process: response to stimulus (GO:0050896);; cellular component: membrane (GO:0016020);; cellular component: membrane part (GO:0044425)
PaF106G0800029902.01	PaF106G0800029902.01	12.6276	642	13.4688	638	18.0575	997	7.90669	437	6.80591	315	6.35154	341	1.77432e-12	1.08791	up	up	up	up	1.1936e-13	up	1.77432e-12	1.08791	up	--	--	Molecular Function: DNA binding (GO:0003677);; Cellular Component: nucleus (GO:0005634);; Biological Process: regulation of transcription, DNA-templated (GO:0006355);;	K00521|5.7e-34|cmos:111447866|K00521 ferric-chelate reductase [EC:1.16.1.7] | (RefSeq) ferric reduction oxidase 7, chloroplastic-like	--	--	--	No apical meristem (NAM) protein	NAC domain-containing protein 21/22 OS=Arabidopsis thaliana OX=3702 GN=NAC021 PE=1 SV=2	K	Transcription	PREDICTED: protein CUP-SHAPED COTYLEDON 3-like [Prunus mume]	molecular function: binding (GO:0005488);; cellular component: cell (GO:0005623);; cellular component: organelle (GO:0043226);; cellular component: cell part (GO:0044464);; biological process: biological regulation (GO:0065007)
PaF106G0300011891.01	PaF106G0300011891.01	1.84145	214	3.01723	325	2.49683	313	8.84375	1119	10.7687	1137	9.52155	1166	3.06119e-31	-1.83103	down	down	down	down	6.0549e-33	down	3.06119e-31	-1.83103	down	--		Molecular Function: protein kinase activity (GO:0004672);; Molecular Function: ATP binding (GO:0005524);; Biological Process: protein phosphorylation (GO:0006468);; Biological Process: recognition of pollen (GO:0048544);;	K03283|2.4e-40|qsu:112017276|K03283 heat shock 70kDa protein 1/2/6/8 | (RefSeq) heat shock cognate 70 kDa protein 2-like	Spliceosome (ko03040);; Protein processing in endoplasmic reticulum (ko04141);; Endocytosis (ko04144)	--	--	Protein of unknown function (DUF789)	G-type lectin S-receptor-like serine/threonine-protein kinase At2g19130 OS=Arabidopsis thaliana OX=3702 GN=At2g19130 PE=2 SV=1	S	Function unknown	PREDICTED: uncharacterized protein LOC103329493 [Prunus mume]	biological process: metabolic process (GO:0008152);; biological process: cellular process (GO:0009987);; molecular function: catalytic activity (GO:0003824);; molecular function: binding (GO:0005488);; biological process: reproduction (GO:0000003);; biological process: reproductive process (GO:0022414);; biological process: single-organism process (GO:0044699)
PaF106G0200008425.01	PaF106G0200008425.01	0.60765	67	1.18548	121	0.741675	88	0.185629	22	0.160675	16	0.104951	13	5.91887e-09	1.91032	up	up	up	up	6.08838e-10	up	5.91887e-09	1.91032	up	[R]	General function prediction only	Biological Process: signal transduction (GO:0007165);; Molecular Function: ADP binding (GO:0043531);;	K00695|7.1e-81|mtr:MTR_6g478030|K00695 sucrose synthase [EC:2.4.1.13] | (RefSeq) sucrose synthase	Starch and sucrose metabolism (ko00500)	--	--	NB-ARC domain	Disease resistance protein RUN1 OS=Vitis rotundifolia OX=103349 GN=RUN1 PE=1 SV=1	--	--	TMV resistance protein N-like [Prunus avium]	biological process: cellular process (GO:0009987);; biological process: biological regulation (GO:0065007);; molecular function: binding (GO:0005488)
PaF106G0800032004.01	PaF106G0800032004.01	24.1304	3244	22.6564	2840	22.6467	3310	8.40559	1230	7.60005	930	7.45059	1057	6.02743e-71	1.61458	up	up	up	up	3.16678e-73	up	6.02743e-71	1.61458	up	[P]	Inorganic ion transport and metabolism	Molecular Function: potassium ion transmembrane transporter activity (GO:0015079);; Cellular Component: integral component of membrane (GO:0016021);;	K03549|3.2e-273|tcc:18609410|K03549 KUP system potassium uptake protein | (RefSeq) putative potassium transporter 12	--	--	--	K+ potassium transporter	Potassium transporter 7 OS=Arabidopsis thaliana OX=3702 GN=POT7 PE=1 SV=2	P	Inorganic ion transport and metabolism	PREDICTED: potassium transporter 7 [Prunus mume]	biological process: localization (GO:0051179);; molecular function: transporter activity (GO:0005215);; cellular component: membrane (GO:0016020);; cellular component: membrane part (GO:0044425)
PaF106G0800032615.01	PaF106G0800032615.01	48.8744	2084	47.6854	1896	42.5668	1973	14.7507	685	15.7039	609	17.7617	800	4.25178e-39	1.55872	up	up	up	up	6.26356e-41	up	4.25178e-39	1.55872	up	--	--	Molecular Function: DNA binding (GO:0003677);; Cellular Component: nucleus (GO:0005634);; Biological Process: regulation of transcription, DNA-templated (GO:0006355);;	K20043|8.0e-23|aip:107640400|K20043 clathrin coat assembly protein AP180 | (RefSeq) putative clathrin assembly protein At5g35200	--	--	--	Dof domain, zinc finger	Dof zinc finger protein DOF3.5 OS=Arabidopsis thaliana OX=3702 GN=DOF3.5 PE=3 SV=1	K	Transcription	unnamed protein product [Prunus armeniaca]	molecular function: binding (GO:0005488);; cellular component: cell (GO:0005623);; cellular component: organelle (GO:0043226);; cellular component: cell part (GO:0044464);; biological process: biological regulation (GO:0065007)
PaF106G0800032083.01	PaF106G0800032083.01	8.80684	874	10.5724	978	10.7217	1156	0.182174	20	0.246933	23	0.20298	22	6.22247e-160	5.15838	up	up	up	up	5.76927e-163	up	6.22247e-160	5.15838	up	--	--	Molecular Function: protein binding (GO:0005515);;	--	--	--	--	Leucine rich repeat	--	T	Signal transduction mechanisms	PREDICTED: leucine-rich repeat receptor protein kinase EMS1-like [Prunus mume]	molecular function: binding (GO:0005488)
PaF106G0400015972.01	PaF106G0400015972.01	87.3793	5448	107.25	6235	95.6983	6486	48.9242	3320	36.5656	2074	40.1462	2641	2.17403e-28	1.25079	up	up	up	up	4.97203e-30	up	2.17403e-28	1.25079	up	--	--	Molecular Function: DNA binding (GO:0003677);; Cellular Component: nucleus (GO:0005634);; Biological Process: regulation of transcription, DNA-templated (GO:0006355);;	K00521|2.8e-45|cmos:111447866|K00521 ferric-chelate reductase [EC:1.16.1.7] | (RefSeq) ferric reduction oxidase 7, chloroplastic-like	--	--	--	No apical meristem (NAM) protein	NAC domain-containing protein JA2 OS=Solanum lycopersicum OX=4081 GN=JA2 PE=2 SV=1	K	Transcription	unnamed protein product [Prunus armeniaca]	molecular function: binding (GO:0005488);; cellular component: cell (GO:0005623);; cellular component: organelle (GO:0043226);; cellular component: cell part (GO:0044464);; biological process: biological regulation (GO:0065007)
PaF106G0600024068.01	PaF106G0600024068.01	2.45816	157	2.67944	160	3.67603	255	14.7456	1024	12.2075	708	9.67559	651	1.70237e-25	-1.85772	down	down	down	down	4.75268e-27	down	1.70237e-25	-1.85772	down	--	--	Molecular Function: protein dimerization activity (GO:0046983);;	K16190|1.2e-11|bdi:100843665|K16190 glucuronokinase [EC:2.7.1.43] | (RefSeq) transcription factor TDR	Pentose and glucuronate interconversions (ko00040);; Ascorbate and aldarate metabolism (ko00053);; Amino sugar and nucleotide sugar metabolism (ko00520)	--	--	Helix-loop-helix DNA-binding domain	Transcription factor bHLH93 OS=Arabidopsis thaliana OX=3702 GN=BHLH93 PE=1 SV=1	K	Transcription	unnamed protein product [Prunus armeniaca]	molecular function: binding (GO:0005488)
PaF106G0800031136.01	PaF106G0800031136.01	0.90188	41	0.844802	36	2.69221	133	3.63374	180	4.19506	174	3.5476	170	0.00183072	-1.01954	down	down	down	down	0.000537315	down	0.00183072	-1.01954	down	[I]	Lipid transport and metabolism	Biological Process: catabolic process (GO:0009056);; Molecular Function: hydrolase activity (GO:0016787);;	K20506|1.9e-74|egu:105060863|K20506 tuliposide A-converting enzyme [EC:4.2.99.22] | (RefSeq) tuliposide A-converting enzyme 2, chloroplastic-like	--	[V]	Defense mechanisms	alpha/beta hydrolase fold	2-hydroxyisoflavanone dehydratase OS=Glycyrrhiza echinata OX=46348 GN=HIDM PE=1 SV=1	V	Defense mechanisms	PREDICTED: 2-hydroxyisoflavanone dehydratase-like [Prunus mume]	biological process: metabolic process (GO:0008152);; molecular function: catalytic activity (GO:0003824)
PaF106G0100004522.01	PaF106G0100004522.01	2.67363	106	3.14818	109	2.88761	124	13.2581	564	6.43486	228	7.65066	318	6.73612e-09	-1.41233	down	down	down	down	6.9672e-10	down	6.73612e-09	-1.41233	down	--	--	Biological Process: protein polyubiquitination (GO:0000209);; Molecular Function: ATP binding (GO:0005524);; Cellular Component: nucleus (GO:0005634);; Molecular Function: NEDD8 transferase activity (GO:0019788);; Biological Process: protein neddylation (GO:0045116);; Molecular Function: ubiquitin conjugating enzyme activity (GO:0061631);;	K10579|3.4e-103|pper:18789696|K10579 ubiquitin-conjugating enzyme E2 M [EC:2.3.2.34] | (RefSeq) probable NEDD8-conjugating enzyme Ubc12-like isoform X2	Ubiquitin mediated proteolysis (ko04120)	[O]	Posttranslational modification, protein turnover, chaperones	Ubiquitin-conjugating enzyme	Probable NEDD8-conjugating enzyme Ubc12-like OS=Arabidopsis thaliana OX=3702 GN=RCE2 PE=2 SV=1	O	Posttranslational modification, protein turnover, chaperones	unnamed protein product [Prunus armeniaca]	biological process: metabolic process (GO:0008152);; biological process: cellular process (GO:0009987);; molecular function: binding (GO:0005488);; cellular component: cell (GO:0005623);; cellular component: organelle (GO:0043226);; cellular component: cell part (GO:0044464);; molecular function: catalytic activity (GO:0003824)
PaF106G0600025398.01	PaF106G0600025398.01	3.47976	461	4.37339	537	4.10066	593	14.4713	2089	14.2789	1725	13.5055	1891	3.55646e-62	-1.71815	down	down	down	down	2.3082e-64	down	3.55646e-62	-1.71815	down	--	--	Molecular Function: oxidoreductase activity, acting on single donors with incorporation of molecular oxygen, incorporation of two atoms of oxygen (GO:0016702);; Biological Process: oxylipin biosynthetic process (GO:0031408);; Molecular Function: metal ion binding (GO:0046872);;	K15718|0.0e+00|pmum:103344101|K15718 linoleate 9S-lipoxygenase [EC:1.13.11.58] | (RefSeq) probable linoleate 9S-lipoxygenase 5	Linoleic acid metabolism (ko00591)	--	--	Lipoxygenase	Probable linoleate 9S-lipoxygenase 5 OS=Solanum tuberosum OX=4113 GN=LOX1.5 PE=2 SV=1	E	Amino acid transport and metabolism	PREDICTED: probable linoleate 9S-lipoxygenase 5 [Prunus mume]	biological process: metabolic process (GO:0008152);; biological process: single-organism process (GO:0044699);; molecular function: catalytic activity (GO:0003824);; biological process: cellular process (GO:0009987);; molecular function: binding (GO:0005488)
PaF106G0100000806.01	PaF106G0100000806.01	3.33557	648	3.08367	559	3.2895	695	1.37321	291	1.90871	337	1.49966	308	4.82147e-12	1.05266	up	up	up	up	3.3726e-13	up	4.82147e-12	1.05266	up	--	--	Molecular Function: helicase activity (GO:0004386);;	--	--	--	--	--	--	--	--	putative RNA helicase SDE3 [Prunus yedoensis var. nudiflora]	molecular function: catalytic activity (GO:0003824)
PaF106G0400017421.01	PaF106G0400017421.01	1.70213	251	1.99802	276	2.23871	336	1.00443	168	1.06976	129	0.620289	101	8.95242e-08	1.10874	up	up	up	up	1.10118e-08	up	8.95242e-08	1.10874	up	[T]	Signal transduction mechanisms	Molecular Function: protein kinase activity (GO:0004672);; Molecular Function: ATP binding (GO:0005524);; Cellular Component: endosome (GO:0005768);; Cellular Component: plasma membrane (GO:0005886);; Biological Process: receptor-mediated endocytosis (GO:0006898);; Biological Process: regulation of anion channel activity (GO:0010359);; Cellular Component: integral component of membrane (GO:001602…	K13420|2.2e-226|pavi:110766585|K13420 LRR receptor-like serine/threonine-protein kinase FLS2 [EC:2.7.11.1] | (RefSeq) LRR receptor-like serine/threonine-protein kinase FLS2	MAPK signaling pathway - plant (ko04016);; Plant-pathogen interaction (ko04626)	--	--	Protein kinase domain	LRR receptor-like serine/threonine-protein kinase FLS2 OS=Arabidopsis thaliana OX=3702 GN=FLS2 PE=1 SV=1	T	Signal transduction mechanisms	unnamed protein product [Prunus armeniaca]	biological process: metabolic process (GO:0008152);; biological process: cellular process (GO:0009987);; molecular function: catalytic activity (GO:0003824);; molecular function: binding (GO:0005488);; cellular component: cell (GO:0005623);; cellular component: organelle (GO:0043226);; cellular component: cell part (GO:0044464);; cellular component: membrane (GO:0016020);; biological process: loc…
PaF106G0300011223.01	PaF106G0300011223.01	0.750869	96	1.2926	154	1.27063	176	0.453362	63	0.260976	31	0.589405	80	0.000193581	1.13643	up	up	up	up	4.50899e-05	up	0.000193581	1.13643	up	--	--	Molecular Function: kinase activity (GO:0016301);;	K17398|2.8e-23|gmx:100812480|K17398 DNA (cytosine-5)-methyltransferase 3A [EC:2.1.1.37] | (RefSeq) uncharacterized protein LOC100812480	Cysteine and methionine metabolism (ko00270)	--	--	PWWP domain	--	S	Function unknown	PREDICTED: serine/threonine-protein kinase ATM [Prunus mume]	molecular function: catalytic activity (GO:0003824)
PaF106G0300014458.01	PaF106G0300014458.01	23.2371	2223	27.8484	2570	27.2285	2848	11.011	1166	11.366	972	9.96476	1045	1.91951e-42	1.32811	up	up	up	up	2.45204e-44	up	1.91951e-42	1.32811	up	--	--	Molecular Function: DNA binding (GO:0003677);; Cellular Component: nucleus (GO:0005634);;	--	--	[O]	Posttranslational modification, protein turnover, chaperones	--	Protein REVEILLE 1 OS=Arabidopsis thaliana OX=3702 GN=RVE1 PE=1 SV=1	K	Transcription	unnamed protein product [Prunus armeniaca]	molecular function: binding (GO:0005488);; cellular component: cell (GO:0005623);; cellular component: organelle (GO:0043226);; cellular component: cell part (GO:0044464)
PaF106G0800029457.01	PaF106G0800029457.01	1.12899	33	1.31592	36	1.04678	34	2.44968	78	2.65493	71	4.75123	147	0.000612075	-1.11857	down	down	down	down	0.000159687	down	0.000612075	-1.11857	down	--	--	Molecular Function: transferase activity (GO:0016740);;	K00799|2.4e-15|pmum:103333892|K00799 glutathione S-transferase [EC:2.5.1.18] | (RefSeq) glutathione S-transferase F13-like	Glutathione metabolism (ko00480)	--	--	Glutathione S-transferase, N-terminal domain	Glutathione S-transferase PARB OS=Nicotiana tabacum OX=4097 GN=PARB PE=2 SV=1	O	Posttranslational modification, protein turnover, chaperones	PREDICTED: glutathione S-transferase F13-like [Prunus mume]	molecular function: catalytic activity (GO:0003824)
PaF106G0400018149.01	PaF106G0400018149.01	0.184689	16	0.224427	18	0.253001	23	0.747355	67	1.29181	97	1.18055	99	3.8785e-07	-1.64404	down	down	down	down	5.3301e-08	down	3.8785e-07	-1.64404	down	[V]	Defense mechanisms	Molecular Function: antiporter activity (GO:0015297);; Cellular Component: membrane (GO:0016020);; Cellular Component: integral component of membrane (GO:0016021);; Molecular Function: transmembrane transporter activity (GO:0022857);; Molecular Function: xenobiotic transporter activity (GO:0042910);;	K03327|1.0e-152|pmum:103324527|K03327 multidrug resistance protein, MATE family | (RefSeq) protein DETOXIFICATION 40-like	--	[R]	General function prediction only	MatE	Protein DETOXIFICATION 40 OS=Arabidopsis thaliana OX=3702 GN=DTX40 PE=1 SV=1	V	Defense mechanisms	PREDICTED: protein DETOXIFICATION 40-like [Prunus mume]	biological process: localization (GO:0051179);; molecular function: transporter activity (GO:0005215);; cellular component: membrane (GO:0016020);; cellular component: membrane part (GO:0044425)
PaF106G0500021088.01	PaF106G0500021088.01	3.03339	218	4.03279	270	4.80633	375	11.3013	883	9.69966	634	9.62135	729	1.33889e-14	-1.23593	down	down	down	down	7.55858e-16	down	1.33889e-14	-1.23593	down	[QV]	Secondary metabolites biosynthesis, transport and catabolism;; Defense mechanisms	Molecular Function: monooxygenase activity (GO:0004497);; Molecular Function: iron ion binding (GO:0005506);; Molecular Function: oxidoreductase activity, acting on paired donors, with incorporation or reduction of molecular oxygen (GO:0016705);; Molecular Function: heme binding (GO:0020037);;	K20562|5.4e-167|thj:104815260|K20562 biphenyl-4-hydroxylase | (RefSeq) cytochrome P450 CYP736A12-like	--	[Q]	Secondary metabolites biosynthesis, transport and catabolism	Cytochrome P450	Cytochrome P450 CYP736A12 OS=Panax ginseng OX=4054 PE=2 SV=1	Q	Secondary metabolites biosynthesis, transport and catabolism	PREDICTED: cytochrome P450 CYP736A12-like [Prunus mume]	biological process: metabolic process (GO:0008152);; biological process: single-organism process (GO:0044699);; molecular function: catalytic activity (GO:0003824);; molecular function: binding (GO:0005488)
PaF106G0100000157.01	PaF106G0100000157.01	1.09267	289	0.91093	226	1.2191	351	0.045753	14	0.047465	12	0.068715	20	1.70327e-49	3.6946	up	up	up	up	1.71958e-51	up	1.70327e-49	3.6946	up	--	--	Biological Process: defense response (GO:0006952);; Molecular Function: ADP binding (GO:0043531);;	K15078|5.6e-116|tcc:18614561|K15078 structure-specific endonuclease subunit SLX1 [EC:3.6.1.-] | (RefSeq) putative disease resistance protein RGA3	--	[T]	Signal transduction mechanisms	NB-ARC domain	Putative disease resistance protein RGA1 OS=Solanum bulbocastanum OX=147425 GN=RGA1 PE=2 SV=2	T	Signal transduction mechanisms	putative disease resistance protein RGA1 [Prunus avium]	biological process: response to stimulus (GO:0050896);; molecular function: binding (GO:0005488)
PaF106G0700027385.01	PaF106G0700027385.01	3.50252	154	4.09459	168	4.157	199	1.5445	74	2.29612	92	1.75869	82	1.22129e-05	1.02867	up	up	up	up	2.21121e-06	up	1.22129e-05	1.02867	up	--	--	Molecular Function: DNA binding (GO:0003677);; Cellular Component: nucleus (GO:0005634);;	--	--	--	--	B3 DNA binding domain	Putative B3 domain-containing protein Os03g0621600 OS=Oryza sativa subsp. japonica OX=39947 GN=Os03g0621600 PE=3 SV=1	K	Transcription	unnamed protein product [Prunus armeniaca]	molecular function: binding (GO:0005488);; cellular component: cell (GO:0005623);; cellular component: organelle (GO:0043226);; cellular component: cell part (GO:0044464)
PaF106G0100006004.01	PaF106G0100006004.01	2.70641	111	2.79118	107	3.61241	161	1.1225	51	0.988198	37	1.02156	45	1.63887e-07	1.37688	up	up	up	up	2.10873e-08	up	1.63887e-07	1.37688	up	--	--	--	K00020|5.3e-16|mtr:MTR_8g088900|K00020 3-hydroxyisobutyrate dehydrogenase [EC:1.1.1.31] | (RefSeq) 6-phosphogluconate dehydrogenase-like protein	Valine, leucine and isoleucine degradation (ko00280)	--	--	Phosphate-induced protein 1 conserved region	Protein EXORDIUM-like 2 OS=Arabidopsis thaliana OX=3702 GN=EXL2 PE=2 SV=1	L	Replication, recombination and repair	unnamed protein product [Prunus armeniaca]	--
PaF106G0300014138.01	PaF106G0300014138.01	0.853126	146	0.716484	115	0.922785	172	0.06008	12	0.058769	10	0.032052	6	2.13702e-26	3.15286	up	up	up	up	5.59187e-28	up	2.13702e-26	3.15286	up	--	--	Cellular Component: integral component of membrane (GO:0016021);; Molecular Function: ADP binding (GO:0043531);;	K13457|4.0e-43|qsu:112007111|K13457 disease resistance protein RPM1 | (RefSeq) disease resistance protein RPM1-like	Plant-pathogen interaction (ko04626)	[T]	Signal transduction mechanisms	NB-ARC domain	Probable disease resistance RPP8-like protein 2 OS=Arabidopsis thaliana OX=3702 GN=RPP8L2 PE=3 SV=1	T	Signal transduction mechanisms	unnamed protein product [Prunus armeniaca]	cellular component: membrane (GO:0016020);; cellular component: membrane part (GO:0044425);; molecular function: binding (GO:0005488)
PaF106G0400016137.01	PaF106G0400016137.01	0.353124	33	0.242768	21	0.236378	24	0.956695	96	1.47686	123	1.09347	106	1.69227e-07	-1.59287	down	down	down	down	2.18268e-08	down	1.69227e-07	-1.59287	down	--		Molecular Function: protein kinase activity (GO:0004672);; Molecular Function: ATP binding (GO:0005524);; Cellular Component: integral component of membrane (GO:0016021);; Molecular Function: carbohydrate binding (GO:0030246);;	K22133|5.1e-96|egr:104443802|K22133 oxalate---CoA ligase [EC:6.2.1.8] | (RefSeq) oxalate--CoA ligase	Glyoxylate and dicarboxylate metabolism (ko00630)	--	--	Legume lectin domain	L-type lectin-domain containing receptor kinase IX.1 OS=Arabidopsis thaliana OX=3702 GN=LECRK91 PE=1 SV=1	T	Signal transduction mechanisms	L-type lectin-domain containing receptor kinase IX.1-like [Prunus avium]	biological process: metabolic process (GO:0008152);; biological process: cellular process (GO:0009987);; molecular function: catalytic activity (GO:0003824);; molecular function: binding (GO:0005488);; cellular component: membrane (GO:0016020);; cellular component: membrane part (GO:0044425)
Prunus_sibirica_newGene_1332	--	0.638678	61	0.875231	78	0.679188	71	0.254372	27	0.093674	9	0.136964	14	3.9719e-06	1.59015	up	up	up	up	6.54072e-07	up	3.9719e-06	1.59015	up	--	--	Cellular Component: nucleus (GO:0005634);; Biological Process: regulation of transcription, DNA-templated (GO:0006355);; Molecular Function: zinc ion binding (GO:0008270);; Molecular Function: kinase activity (GO:0016301);;	K17604|5.9e-50|aly:110227432|K17604 zinc finger SWIM domain-containing protein 3 | (RefSeq) protein FAR1-RELATED SEQUENCE 5-like	--	--	--	MULE transposase domain	Protein FAR-RED ELONGATED HYPOCOTYL 3 OS=Arabidopsis thaliana OX=3702 GN=FHY3 PE=1 SV=1	S	Function unknown	PREDICTED: protein FAR1-RELATED SEQUENCE 5-like [Prunus mume]	cellular component: cell (GO:0005623);; cellular component: organelle (GO:0043226);; cellular component: cell part (GO:0044464);; biological process: biological regulation (GO:0065007);; molecular function: binding (GO:0005488);; molecular function: catalytic activity (GO:0003824)
PaF106G0600022361.01	PaF106G0600022361.01	0.929534	146	1.03415	151	0.807329	138	2.21553	377	2.53771	361	1.7833	295	4.08383e-08	-1.07586	down	down	down	down	4.75402e-09	down	4.08383e-08	-1.07586	down	--	--	Biological Process: signal transduction (GO:0007165);; Molecular Function: ADP binding (GO:0043531);;	K16225|2.6e-20|csat:104760397|K16225 probable WRKY transcription factor 52 | (RefSeq) disease resistance protein RRS1-like	Plant-pathogen interaction (ko04626)	--	--	--	Disease resistance protein RUN1 OS=Vitis rotundifolia OX=103349 GN=RUN1 PE=1 SV=1	S	Function unknown	TMV resistance protein N-like [Prunus avium]	biological process: cellular process (GO:0009987);; biological process: biological regulation (GO:0065007);; molecular function: binding (GO:0005488)
PaF106G0700028608.01	PaF106G0700028608.01	1.04287	67	1.19557	72	1.3873	97	0.321953	22	0.059282	4	0.173646	12	3.8862e-08	1.91953	up	up	up	up	4.51195e-09	up	3.8862e-08	1.91953	up	--	--	Molecular Function: DNA binding (GO:0003677);; Cellular Component: nucleus (GO:0005634);;	--	--	--	--	B3 DNA binding domain	B3 domain-containing transcription factor VRN1 OS=Arabidopsis thaliana OX=3702 GN=VRN1 PE=1 SV=1	K	Transcription	PREDICTED: B3 domain-containing transcription factor VRN1-like isoform X1 [Prunus mume]	molecular function: binding (GO:0005488);; cellular component: cell (GO:0005623);; cellular component: organelle (GO:0043226);; cellular component: cell part (GO:0044464)
PaF106G0100004690.01	PaF106G0100004690.01	0.795173	102	0.843903	101	1.04168	145	2.429	338	2.06203	240	2.56443	346	3.93231e-10	-1.2288	down	down	down	down	3.45956e-11	down	3.93231e-10	-1.2288	down	--	--	Molecular Function: ligand-gated ion channel activity (GO:0015276);; Cellular Component: integral component of membrane (GO:0016021);;	K05387|3.3e-182|pmum:103320898|K05387 glutamate receptor, ionotropic, plant | (RefSeq) glutamate receptor 2.8-like	--	[PET]	Inorganic ion transport and metabolism;; Amino acid transport and metabolism;; Signal transduction mechanisms	Receptor family ligand binding region	Glutamate receptor 2.2 OS=Arabidopsis thaliana OX=3702 GN=GLR2.2 PE=2 SV=1	--	--	unnamed protein product [Prunus armeniaca]	biological process: localization (GO:0051179);; molecular function: transporter activity (GO:0005215);; molecular function: molecular transducer activity (GO:0060089);; cellular component: membrane (GO:0016020);; cellular component: membrane part (GO:0044425)
PaF106G0800032353.01	PaF106G0800032353.01	13.9786	675	13.9698	630	12.9963	690	35.8992	1895	36.8442	1629	37.8071	1941	1.02108e-40	-1.33732	down	down	down	down	1.41481e-42	down	1.02108e-40	-1.33732	down	[C]	Energy production and conversion	--	K11168|2.7e-197|pmum:103336213|K11168 dehydrogenase/reductase SDR family member 12 [EC:1.1.-.-] | (RefSeq) dehydrogenase/reductase SDR family member 12	--	[Q]	Secondary metabolites biosynthesis, transport and catabolism	short chain dehydrogenase	Short-chain dehydrogenase TIC 32 B, chloroplastic OS=Brassica napus OX=3708 GN=TIC32B PE=3 SV=1	Q	Secondary metabolites biosynthesis, transport and catabolism	PREDICTED: dehydrogenase/reductase SDR family member 12 [Prunus mume]	--
PaF106G0600021617.01	PaF106G0600021617.01	19.7062	661	15.9021	498	22.0281	803	40.1922	1467	47.9885	1464	38.3589	1357	3.06754e-14	-1.02383	down	down	down	down	1.7997e-15	down	3.06754e-14	-1.02383	down	--	--	Cellular Component: nucleosome (GO:0000786);; Molecular Function: DNA binding (GO:0003677);; Cellular Component: nucleus (GO:0005634);; Molecular Function: protein heterodimerization activity (GO:0046982);;	K11253|1.4e-66|adu:107470357|K11253 histone H3 | (RefSeq) histone H3.2	--	[B]	Chromatin structure and dynamics	Core histone H2A/H2B/H3/H4	Histone H3.2 OS=Arabidopsis thaliana OX=3702 GN=HTR2 PE=1 SV=2	B	Chromatin structure and dynamics	Histone superfamily protein [Theobroma cacao]	cellular component: cell (GO:0005623);; cellular component: macromolecular complex (GO:0032991);; cellular component: organelle (GO:0043226);; cellular component: organelle part (GO:0044422);; cellular component: cell part (GO:0044464);; molecular function: binding (GO:0005488)
PaF106G0100006300.01	PaF106G0100006300.01	4.19212	679	3.88156	586	4.43233	780	1.80433	318	1.8789	277	1.45323	249	4.66807e-21	1.3101	up	up	up	up	1.68314e-22	up	4.66807e-21	1.3101	up	[R]	General function prediction only	Biological Process: signal transduction (GO:0007165);; Molecular Function: ADP binding (GO:0043531);;	K00695|5.0e-126|mtr:MTR_6g478030|K00695 sucrose synthase [EC:2.4.1.13] | (RefSeq) sucrose synthase	Starch and sucrose metabolism (ko00500)	--	--	TIR domain	Disease resistance protein RPV1 OS=Vitis rotundifolia OX=103349 GN=RPV1 PE=1 SV=1	T	Signal transduction mechanisms	disease resistance protein RPV1-like [Prunus dulcis]	biological process: cellular process (GO:0009987);; biological process: biological regulation (GO:0065007);; molecular function: binding (GO:0005488)
PaF106G0600025634.01	PaF106G0600025634.01	0.122103	11	0.020519	2	0.14052	14	0.903609	88	0.682822	56	0.508863	48	2.58672e-06	-1.7441	down	down	down	down	4.10912e-07	down	2.58672e-06	-1.7441	down	--	--	Molecular Function: aspartic-type endopeptidase activity (GO:0004190);; Cellular Component: integral component of membrane (GO:0016021);;	K01381|3.7e-61|sly:101249745|K01381 saccharopepsin [EC:3.4.23.25] | (RefSeq) aspartic proteinase CDR1	--	[O]	Posttranslational modification, protein turnover, chaperones	Xylanase inhibitor N-terminal	Aspartyl protease 37 OS=Oryza sativa subsp. japonica OX=39947 GN=AP37 PE=3 SV=2	O	Posttranslational modification, protein turnover, chaperones	unnamed protein product [Prunus armeniaca]	biological process: metabolic process (GO:0008152);; molecular function: catalytic activity (GO:0003824);; cellular component: membrane (GO:0016020);; cellular component: membrane part (GO:0044425)
PaF106G0400016566.01	PaF106G0400016566.01	1.05041	63	1.26779	70	1.09912	71	0.212353	14	0.38621	21	0.683448	43	0.00326498	1.06031	up	up	up	up	0.00101999	up	0.00326498	1.06031	up	--	--	Molecular Function: transferase activity, transferring acyl groups other than amino-acyl groups (GO:0016747);;	K13065|1.1e-66|cic:CICLE_v10001106mg|K13065 shikimate O-hydroxycinnamoyltransferase [EC:2.3.1.133] | (RefSeq) hypothetical protein	Phenylpropanoid biosynthesis (ko00940);; Flavonoid biosynthesis (ko00941);; Stilbenoid, diarylheptanoid and gingerol biosynthesis (ko00945)	--	--	Transferase family	(13S,14R)-1,13-dihydroxy-N-methylcanadine 13-O-acetyltransferase AT1 OS=Papaver somniferum OX=3469 GN=AT1 PE=1 SV=1	S	Function unknown	PREDICTED: BAHD acyltransferase At5g47980-like [Prunus mume]	molecular function: catalytic activity (GO:0003824)
PaF106G0500021260.01	PaF106G0500021260.01	1.87022	208	2.1463	223	1.34331	162	5.41378	656	4.36924	442	4.93615	579	1.2316e-11	-1.29081	down	down	down	down	9.09076e-13	down	1.2316e-11	-1.29081	down	[P]	Inorganic ion transport and metabolism	Molecular Function: potassium ion transmembrane transporter activity (GO:0015079);; Cellular Component: integral component of membrane (GO:0016021);;	K03549|4.6e-161|pmum:103338808|K03549 KUP system potassium uptake protein | (RefSeq) potassium transporter 2	--	--	--	K+ potassium transporter	Potassium transporter 10 OS=Oryza sativa subsp. japonica OX=39947 GN=HAK10 PE=2 SV=1	O	Posttranslational modification, protein turnover, chaperones	unnamed protein product [Prunus armeniaca]	biological process: localization (GO:0051179);; molecular function: transporter activity (GO:0005215);; cellular component: membrane (GO:0016020);; cellular component: membrane part (GO:0044425)
PaF106G0500019095.01	PaF106G0500019095.01	0	0	0	0	0	0	4.98202	262	5.37155	232	4.99145	251	6.12957e-58	-5.11857	down	down	down	down	4.5465e-60	down	6.12957e-58	-5.11857	down	--	--	Molecular Function: hydrolase activity (GO:0016787);;	K03787|2.6e-50|pavi:110749113|K03787 5'-nucleotidase [EC:3.1.3.5] | (RefSeq) uncharacterized protein LOC110749113	Purine metabolism (ko00230);; Pyrimidine metabolism (ko00240);; Nicotinate and nicotinamide metabolism (ko00760)	--	--	Survival protein SurE	--	S	Function unknown	uncharacterized protein LOC18771206 [Prunus persica]	molecular function: catalytic activity (GO:0003824)
PaF106G0600021620.01	PaF106G0600021620.01	2.78139	200	2.50535	168	4.06704	316	7.33795	561	8.68427	564	7.01174	534	3.57121e-10	-1.14386	down	down	down	down	3.12164e-11	down	3.57121e-10	-1.14386	down	--	--	Biological Process: regulation of cyclin-dependent protein serine/threonine kinase activity (GO:0000079);; Cellular Component: cyclin-dependent protein kinase holoenzyme complex (GO:0000307);; Cellular Component: nucleus (GO:0005634);; Cellular Component: cytoplasm (GO:0005737);; Molecular Function: cyclin-dependent protein serine/threonine kinase regulator activity (GO:0016538);; Cellular Compon…	K21777|1.1e-245|pmum:103319481|K21777 G2/mitotic-specific cyclin-B, other | (RefSeq) G2/mitotic-specific cyclin S13-7-like	--	[D]	Cell cycle control, cell division, chromosome partitioning	Cyclin, N-terminal domain	G2/mitotic-specific cyclin-2 OS=Antirrhinum majus OX=4151 PE=2 SV=1	D	Cell cycle control, cell division, chromosome partitioning	unnamed protein product [Prunus armeniaca]	biological process: biological regulation (GO:0065007);; cellular component: cell (GO:0005623);; cellular component: macromolecular complex (GO:0032991);; cellular component: cell part (GO:0044464);; cellular component: organelle (GO:0043226);; molecular function: molecular function regulator (GO:0098772);; cellular component: other organism (GO:0044215);; cellular component: other organism part …
PaF106G0200010567.01	PaF106G0200010567.01	1.02562	97	1.4064	120	1.2526	125	3.26452	329	3.82378	325	3.08267	299	1.28067e-11	-1.29978	down	down	down	down	9.49913e-13	down	1.28067e-11	-1.29978	down	--	--	Molecular Function: chromatin binding (GO:0003682);; Molecular Function: DNA-directed DNA polymerase activity (GO:0003887);; Molecular Function: DNA primase activity (GO:0003896);; Cellular Component: nucleus (GO:0005634);; Cellular Component: mitochondrial matrix (GO:0005759);; Biological Process: mitochondrial DNA replication (GO:0006264);; Biological Process: response to UV (GO:0009411);; Biol…	K22761|6.2e-216|pmum:103333714|K22761 DNA-directed primase/polymerase protein [EC:2.7.7.102 2.7.7.7] | (RefSeq) DNA-directed primase/polymerase protein	--	--	--	Herpesviridae UL52/UL70 DNA primase	--	S	Function unknown	unnamed protein product [Prunus armeniaca]	molecular function: binding (GO:0005488);; biological process: metabolic process (GO:0008152);; biological process: cellular process (GO:0009987);; molecular function: catalytic activity (GO:0003824);; cellular component: cell (GO:0005623);; cellular component: organelle (GO:0043226);; cellular component: cell part (GO:0044464);; cellular component: membrane-enclosed lumen (GO:0031974);; cellular…
PaF106G0100006216.01	PaF106G0100006216.01	2.89359	168	2.9245	159	2.60294	164	1.04839	67	1.35768	72	0.875566	54	1.74888e-07	1.2717	up	up	up	up	2.2656e-08	up	1.74888e-07	1.2717	up	--	--	Cellular Component: integral component of membrane (GO:0016021);;	K13466|1.0e-12|spen:107024367|K13466 EIX receptor 1/2 | (RefSeq) receptor-like protein EIX2	Plant-pathogen interaction (ko04626)	[R]	General function prediction only	Leucine rich repeat	Receptor like protein 24 OS=Arabidopsis thaliana OX=3702 GN=RLP24 PE=3 SV=1	S	Function unknown	unnamed protein product [Prunus armeniaca]	cellular component: membrane (GO:0016020);; cellular component: membrane part (GO:0044425)
PaF106G0200008738.01	PaF106G0200008738.01	3.79579	206	4.61734	233	5.01889	296	9.40039	554	11.1076	547	10.2425	585	2.48534e-12	-1.07354	down	down	down	down	1.69752e-13	down	2.48534e-12	-1.07354	down	[T]	Signal transduction mechanisms	Biological Process: microtubule cytoskeleton organization (GO:0000226);; Biological Process: mitotic cell cycle (GO:0000278);; Cellular Component: chromosome, centromeric region (GO:0000775);; Molecular Function: ATP binding (GO:0005524);; Cellular Component: nucleus (GO:0005634);; Cellular Component: spindle (GO:0005819);; Biological Process: chromosome segregation (GO:0007059);; Biological Proc…	K08850|1.2e-157|pavi:110766848|K08850 aurora kinase, other [EC:2.7.11.1] | (RefSeq) serine/threonine-protein kinase Aurora-3	--	[D]	Cell cycle control, cell division, chromosome partitioning	Protein kinase domain	Serine/threonine-protein kinase Aurora-3 OS=Arabidopsis thaliana OX=3702 GN=AUR3 PE=2 SV=1	T	Signal transduction mechanisms	unnamed protein product [Prunus armeniaca]	biological process: cellular process (GO:0009987);; biological process: cellular component organization or biogenesis (GO:0071840);; biological process: single-organism process (GO:0044699);; cellular component: cell (GO:0005623);; cellular component: organelle (GO:0043226);; cellular component: organelle part (GO:0044422);; cellular component: cell part (GO:0044464);; molecular function: binding…
PaF106G0200008335.01	PaF106G0200008335.01	1.14365	77	1.71737	107	1.23501	90	2.85306	208	3.1948	194	3.32873	235	9.84812e-06	-1.01507	down	down	down	down	1.74703e-06	down	9.84812e-06	-1.01507	down	[QV]	Secondary metabolites biosynthesis, transport and catabolism;; Defense mechanisms	Molecular Function: monooxygenase activity (GO:0004497);; Molecular Function: iron ion binding (GO:0005506);; Cellular Component: integral component of membrane (GO:0016021);; Molecular Function: oxidoreductase activity, acting on paired donors, with incorporation or reduction of molecular oxygen (GO:0016705);; Molecular Function: heme binding (GO:0020037);;	K20661|1.9e-70|nnu:104612956|K20661 cytochrome P450 family 714 subfamily A polypeptide 1 | (RefSeq) cytochrome P450 714A1-like	--	[QI]	Secondary metabolites biosynthesis, transport and catabolism;; Lipid transport and metabolism	Cytochrome P450	Cytochrome P450 714C2 OS=Oryza sativa subsp. japonica OX=39947 GN=CYP714C2 PE=2 SV=1	Q	Secondary metabolites biosynthesis, transport and catabolism	unnamed protein product [Prunus armeniaca]	biological process: metabolic process (GO:0008152);; biological process: single-organism process (GO:0044699);; molecular function: catalytic activity (GO:0003824);; molecular function: binding (GO:0005488);; cellular component: membrane (GO:0016020);; cellular component: membrane part (GO:0044425)
PaF106G0800032661.01	PaF106G0800032661.01	0.49874	75	0.524214	73	0.525563	85	0	0	0.042499	6	0.030595	5	3.20815e-15	2.78215	up	up	up	up	1.71033e-16	up	3.20815e-15	2.78215	up	--	--	Molecular Function: protein binding (GO:0005515);; Biological Process: signal transduction (GO:0007165);; Molecular Function: ADP binding (GO:0043531);;	K00695|1.6e-141|mtr:MTR_6g478030|K00695 sucrose synthase [EC:2.4.1.13] | (RefSeq) sucrose synthase	Starch and sucrose metabolism (ko00500)	--	--	TIR domain	Disease resistance protein Roq1 OS=Nicotiana benthamiana OX=4100 GN=ROQ1 PE=1 SV=1	T	Signal transduction mechanisms	TMV resistance protein N-like [Prunus avium]	molecular function: binding (GO:0005488);; biological process: cellular process (GO:0009987);; biological process: biological regulation (GO:0065007)
PaF106G0800032154.01	PaF106G0800032154.01	0.744409	123	0.771588	119	0.777069	139	0.223161	40	0.216706	33	0.208139	37	2.83444e-10	1.63024	up	up	up	up	2.44842e-11	up	2.83444e-10	1.63024	up	[R]	General function prediction only	Biological Process: signal transduction (GO:0007165);; Molecular Function: ADP binding (GO:0043531);;	K00695|7.3e-127|mtr:MTR_6g478030|K00695 sucrose synthase [EC:2.4.1.13] | (RefSeq) sucrose synthase	Starch and sucrose metabolism (ko00500)	--	--	TIR domain	TMV resistance protein N OS=Nicotiana glutinosa OX=35889 GN=N PE=1 SV=1	S	Function unknown	TMV resistance protein N [Prunus persica]	biological process: cellular process (GO:0009987);; biological process: biological regulation (GO:0065007);; molecular function: binding (GO:0005488)
PaF106G0700028373.01	PaF106G0700028373.01	2.839	130	2.35107	100	2.4806	123	0	0	0	0	0	0	7.26989e-34	4.17001	up	up	up	up	1.2994e-35	up	7.26989e-34	4.17001	up	--	--	Biological Process: signal transduction (GO:0007165);; Molecular Function: ADP binding (GO:0043531);;	K09338|1.0e-24|brp:103838097|K09338 homeobox-leucine zipper protein | (RefSeq) LOW QUALITY PROTEIN: homeobox-leucine zipper protein HAT7	--	--	--	NB-ARC domain	Disease resistance protein Roq1 OS=Nicotiana benthamiana OX=4100 GN=ROQ1 PE=1 SV=1	S	Function unknown	unnamed protein product [Prunus armeniaca]	biological process: cellular process (GO:0009987);; biological process: biological regulation (GO:0065007);; molecular function: binding (GO:0005488)
PaF106G0300011745.01	PaF106G0300011745.01	0.157317	8	0.205374	10	0.433928	23	1.32405	70	1.10242	49	0.921964	48	0.00024602	-1.34059	down	down	down	down	5.87615e-05	down	0.00024602	-1.34059	down	[M]	Cell wall/membrane/envelope biogenesis	Molecular Function: 3-beta-hydroxy-delta5-steroid dehydrogenase activity (GO:0003854);; Biological Process: steroid biosynthetic process (GO:0006694);;	K09753|1.1e-35|ppp:112293893|K09753 cinnamoyl-CoA reductase [EC:1.2.1.44] | (RefSeq) cinnamoyl-CoA reductase 1-like	Phenylpropanoid biosynthesis (ko00940)	[V]	Defense mechanisms	3-beta hydroxysteroid dehydrogenase/isomerase family	Cinnamoyl-CoA reductase-like SNL6 OS=Oryza sativa subsp. japonica OX=39947 GN=SNL6 PE=3 SV=1	V	Defense mechanisms	PREDICTED: dihydroflavonol-4-reductase-like [Prunus mume]	biological process: metabolic process (GO:0008152);; biological process: single-organism process (GO:0044699);; molecular function: catalytic activity (GO:0003824)
PaF106G0700027029.01	PaF106G0700027029.01	0.173548	10	0.17516	9	0.190849	11	1.30368	75	1.33319	65	2.11312	118	1.17319e-10	-2.1689	down	down	down	down	9.71108e-12	down	1.17319e-10	-2.1689	down	--	--	Biological Process: double-strand break repair via homologous recombination (GO:0000724);; Biological Process: recombinational repair (GO:0000725);; Molecular Function: molecular_function (GO:0003674);; Molecular Function: nucleic acid binding (GO:0003676);; Molecular Function: DNA binding (GO:0003677);; Molecular Function: DNA helicase activity (GO:0003678);; Molecular Function: catalytic activi…	--	--	--	--	Protein of unknown function (DUF295)	F-box protein At4g35733 OS=Arabidopsis thaliana OX=3702 GN=At4g35733 PE=2 SV=1	S	Function unknown	unnamed protein product [Prunus armeniaca]	biological process: metabolic process (GO:0008152);; biological process: cellular process (GO:0009987);; biological process: response to stimulus (GO:0050896);; molecular function: binding (GO:0005488);; molecular function: catalytic activity (GO:0003824);; biological process: cellular component organization or biogenesis (GO:0071840);; cellular component: cell (GO:0005623);; cellular component: …
PaF106G0200007209.01	PaF106G0200007209.01	0.887328	101	1.22935	130	1.42456	175	3.62263	445	3.94319	405	3.67949	438	2.23439e-16	-1.49123	down	down	down	down	1.08762e-17	down	2.23439e-16	-1.49123	down	--		Molecular Function: protein kinase activity (GO:0004672);; Molecular Function: ATP binding (GO:0005524);; Cellular Component: integral component of membrane (GO:0016021);;	K13416|2.1e-54|pvu:PHAVU_006G208100g|K13416 brassinosteroid insensitive 1-associated receptor kinase 1 [EC:2.7.10.1 2.7.11.1] | (RefSeq) hypothetical protein	MAPK signaling pathway - plant (ko04016);; Plant hormone signal transduction (ko04075);; Plant-pathogen interaction (ko04626)	[T]	Signal transduction mechanisms	Protein kinase domain	LEAF RUST 10 DISEASE-RESISTANCE LOCUS RECEPTOR-LIKE PROTEIN KINASE-like 2.5 OS=Arabidopsis thaliana OX=3702 GN=LRK10L-2.5 PE=3 SV=1	T	Signal transduction mechanisms	LEAF RUST 10 DISEASE-RESISTANCE LOCUS RECEPTOR-LIKE PROTEIN KINASE-like 2.5 [Prunus dulcis]	biological process: metabolic process (GO:0008152);; biological process: cellular process (GO:0009987);; molecular function: catalytic activity (GO:0003824);; molecular function: binding (GO:0005488);; cellular component: membrane (GO:0016020);; cellular component: membrane part (GO:0044425)
PaF106G0200007686.01	PaF106G0200007686.01	0.403309	27	0.273231	17	0.870586	62	2.36465	167	2.23099	132	1.51687	104	6.60368e-06	-1.45899	down	down	down	down	1.13202e-06	down	6.60368e-06	-1.45899	down	--	--	--	--	--	--	--	--	--	K	Transcription	cycling DOF factor 3, partial [Prunus dulcis]	--
PaF106G0800032547.01	PaF106G0800032547.01	2.61563	397	2.3922	338	2.93263	483	0.140792	24	0.172319	24	0.149912	24	1.32443e-68	3.746	up	up	up	up	7.36778e-71	up	1.32443e-68	3.746	up	[R]	General function prediction only	Biological Process: signal transduction (GO:0007165);; Molecular Function: ADP binding (GO:0043531);;	K00695|1.8e-113|mtr:MTR_6g478030|K00695 sucrose synthase [EC:2.4.1.13] | (RefSeq) sucrose synthase	Starch and sucrose metabolism (ko00500)	--	--	TIR domain	Disease resistance protein RUN1 OS=Vitis rotundifolia OX=103349 GN=RUN1 PE=1 SV=1	S	Function unknown	hypothetical protein PRUPE_8G056700 [Prunus persica]	biological process: cellular process (GO:0009987);; biological process: biological regulation (GO:0065007);; molecular function: binding (GO:0005488)
Prunus_sibirica_newGene_743	--	0.562386	58	0.413106	52	0.539901	61	0.949024	139	0.952847	117	1.19216	169	2.5051e-05	-1.07535	down	down	down	down	4.81123e-06	down	2.5051e-05	-1.07535	down	--	--	Biological Process: mitochondrial RNA metabolic process (GO:0000959);; Molecular Function: molecular_function (GO:0003674);; Molecular Function: nucleic acid binding (GO:0003676);; Molecular Function: RNA binding (GO:0003723);; Molecular Function: catalytic activity (GO:0003824);; Molecular Function: nuclease activity (GO:0004518);; Molecular Function: endonuclease activity (GO:0004519);; Molecul…	K23541|8.4e-22|cmax:111492492|K23541 Ca2+/H+ antiporter, TMEM165/GDT1 family | (RefSeq) putative pentatricopeptide repeat-containing protein At3g23330	--	[R]	General function prediction only	PPR repeat	Putative pentatricopeptide repeat-containing protein At1g64310 OS=Arabidopsis thaliana OX=3702 GN=PCMP-E65 PE=3 SV=1	S	Function unknown	unnamed protein product [Prunus armeniaca]	biological process: metabolic process (GO:0008152);; biological process: cellular process (GO:0009987);; molecular function: binding (GO:0005488);; molecular function: catalytic activity (GO:0003824);; cellular component: cell (GO:0005623);; cellular component: cell part (GO:0044464);; cellular component: organelle (GO:0043226)
PaF106G0200007374.01	PaF106G0200007374.01	4.68984	721	4.53516	650	4.80739	803	1.55173	260	1.95787	274	1.78311	290	9.46729e-26	1.42828	up	up	up	up	2.60407e-27	up	9.46729e-26	1.42828	up	[R]	General function prediction only	Molecular Function: ADP binding (GO:0043531);;	K12818|4.8e-205|mtr:MTR_0267s0070|K12818 ATP-dependent RNA helicase DHX8/PRP22 [EC:3.6.4.13] | (RefSeq) NB-ARC domain disease resistance protein, putative	Spliceosome (ko03040)	[T]	Signal transduction mechanisms	NB-ARC domain	Putative disease resistance RPP13-like protein 1 OS=Arabidopsis thaliana OX=3702 GN=RPPL1 PE=3 SV=1	T	Signal transduction mechanisms	PREDICTED: LOW QUALITY PROTEIN: putative disease resistance RPP13-like protein 1 [Prunus mume]	molecular function: binding (GO:0005488)
PaF106G0200009738.01	PaF106G0200009738.01	1.79774	110	1.93375	110	2.35895	152	0.756708	52	0.915284	52	0.703105	45	3.42564e-06	1.21281	up	up	up	up	5.55471e-07	up	3.42564e-06	1.21281	up	--	--	Cellular Component: plasma membrane (GO:0005886);; Molecular Function: L-glutamine transmembrane transporter activity (GO:0015186);; Cellular Component: integral component of membrane (GO:0016021);; Biological Process: seed development (GO:0048316);;	K17500|1.0e-55|nto:104085001|K17500 integrin-linked kinase-associated serine/threonine phosphatase 2C [EC:3.1.3.16] | (RefSeq) WAT1-related protein At3g18200 isoform X1	--	--	--	EamA-like transporter family	WAT1-related protein At2g39510 OS=Arabidopsis thaliana OX=3702 GN=At2g39510 PE=2 SV=1	S	Function unknown	unnamed protein product [Prunus armeniaca]	cellular component: cell (GO:0005623);; cellular component: membrane (GO:0016020);; cellular component: cell part (GO:0044464);; biological process: single-organism process (GO:0044699);; biological process: localization (GO:0051179);; molecular function: transporter activity (GO:0005215);; cellular component: membrane part (GO:0044425);; biological process: reproduction (GO:0000003);; biological…
PaF106G0100006700.01	PaF106G0100006700.01	120.1	8847	111.85	7682	140.623	11264	68.2582	5447	59.7681	3988	64.9614	5019	2.21611e-27	1.01079	up	up	up	up	5.36505e-29	up	2.21611e-27	1.01079	up	[QV]	Secondary metabolites biosynthesis, transport and catabolism;; Defense mechanisms	Molecular Function: iron ion binding (GO:0005506);; Cellular Component: membrane (GO:0016020);; Molecular Function: oxidoreductase activity, acting on paired donors, with incorporation or reduction of molecular oxygen, NAD(P)H as one donor, and incorporation of one atom of oxygen (GO:0016709);; Molecular Function: heme binding (GO:0020037);;	K09754|4.7e-296|pmum:103319006|K09754 5-O-(4-coumaroyl)-D-quinate 3'-monooxygenase [EC:1.14.14.96] | (RefSeq) cytochrome P450 98A2-like	Phenylpropanoid biosynthesis (ko00940);; Flavonoid biosynthesis (ko00941);; Stilbenoid, diarylheptanoid and gingerol biosynthesis (ko00945)	[Q]	Secondary metabolites biosynthesis, transport and catabolism	Cytochrome P450	Cytochrome P450 98A2 OS=Glycine max OX=3847 GN=CYP98A2 PE=2 SV=1	Q	Secondary metabolites biosynthesis, transport and catabolism	unnamed protein product [Prunus armeniaca]	molecular function: binding (GO:0005488);; cellular component: membrane (GO:0016020);; biological process: metabolic process (GO:0008152);; biological process: single-organism process (GO:0044699);; molecular function: catalytic activity (GO:0003824)
PaF106G0800030401.01	PaF106G0800030401.01	4.70849	788	4.69631	733	4.55755	829	1.58636	290	2.13945	326	2.20539	390	1.46595e-16	1.25075	up	up	up	up	7.08282e-18	up	1.46595e-16	1.25075	up	[R]	General function prediction only	Biological Process: signal transduction (GO:0007165);; Molecular Function: ADP binding (GO:0043531);;	K00695|1.0e-97|mtr:MTR_6g478030|K00695 sucrose synthase [EC:2.4.1.13] | (RefSeq) sucrose synthase	Starch and sucrose metabolism (ko00500)	--	--	TIR domain	TMV resistance protein N OS=Nicotiana glutinosa OX=35889 GN=N PE=1 SV=1	T	Signal transduction mechanisms	PREDICTED: probable disease resistance protein RPP1 isoform X2 [Prunus mume]	biological process: cellular process (GO:0009987);; biological process: biological regulation (GO:0065007);; molecular function: binding (GO:0005488)
PaF106G0800032778.01	PaF106G0800032778.01	4.06815	537	4.13651	509	3.62115	519	1.20114	173	1.36101	164	0.94187	132	7.95336e-25	1.73024	up	up	up	up	2.28597e-26	up	7.95336e-25	1.73024	up	--	--	Biological Process: defense response (GO:0006952);; Molecular Function: ADP binding (GO:0043531);;	K13457|0.0e+00|pper:18768817|K13457 disease resistance protein RPM1 | (RefSeq) disease resistance protein RPM1	Plant-pathogen interaction (ko04626)	[T]	Signal transduction mechanisms	NB-ARC domain	Disease resistance protein RPM1 OS=Arabidopsis thaliana OX=3702 GN=RPM1 PE=1 SV=1	T	Signal transduction mechanisms	disease resistance protein RPM1 [Prunus persica]	biological process: response to stimulus (GO:0050896);; molecular function: binding (GO:0005488)
PaF106G0700027781.01	PaF106G0700027781.01	37.3825	2599	30.2959	1964	26.4755	2001	12.8702	974	11.4065	722	13.0898	961	5.0449e-22	1.35753	up	up	up	up	1.71767e-23	up	5.0449e-22	1.35753	up	[T]	Signal transduction mechanisms	Molecular Function: acid phosphatase activity (GO:0003993);; Molecular Function: metal ion binding (GO:0046872);;	K22390|5.4e-245|pmum:103339700|K22390 acid phosphatase type 7 | (RefSeq) purple acid phosphatase 22-like	--	[G]	Carbohydrate transport and metabolism	Purple acid Phosphatase, N-terminal domain	Purple acid phosphatase 22 OS=Arabidopsis thaliana OX=3702 GN=PAP22 PE=2 SV=1	G	Carbohydrate transport and metabolism	unnamed protein product [Prunus armeniaca]	biological process: metabolic process (GO:0008152);; biological process: cellular process (GO:0009987);; molecular function: catalytic activity (GO:0003824);; molecular function: binding (GO:0005488)
PaF106G0200007328.01	PaF106G0200007328.01	0.399964	91	0.447353	93	0.443437	121	1.34467	339	1.18641	258	0.942957	232	1.15204e-09	-1.25035	down	down	down	down	1.07525e-10	down	1.15204e-09	-1.25035	down	[R]	General function prediction only	Molecular Function: ADP binding (GO:0043531);;	K12818|1.3e-209|mtr:MTR_0267s0070|K12818 ATP-dependent RNA helicase DHX8/PRP22 [EC:3.6.4.13] | (RefSeq) NB-ARC domain disease resistance protein, putative	Spliceosome (ko03040)	[T]	Signal transduction mechanisms	NB-ARC domain	Putative disease resistance RPP13-like protein 1 OS=Arabidopsis thaliana OX=3702 GN=RPPL1 PE=3 SV=1	T	Signal transduction mechanisms	PREDICTED: putative disease resistance RPP13-like protein 1 [Prunus mume]	molecular function: binding (GO:0005488)
PaF106G0700028861.01	PaF106G0700028861.01	2.58854	217	2.61861	205	3.29263	300	6.50776	594	7.62739	581	6.70668	593	6.50696e-15	-1.16886	down	down	down	down	3.55614e-16	down	6.50696e-15	-1.16886	down	--	--	Cellular Component: integral component of membrane (GO:0016021);;	K13863|4.1e-75|obr:102704603|K13863 solute carrier family 7 (cationic amino acid transporter), member 1 | (RefSeq) uncharacterized LOC102704603	--	--	--	NEMP family	--	S	Function unknown	unnamed protein product [Prunus armeniaca]	cellular component: membrane (GO:0016020);; cellular component: membrane part (GO:0044425)
PaF106G0700028364.01	PaF106G0700028364.01	1.26062	312	0.95663	221	1.15561	311	0.018069	5	0	0	0	0	1.90593e-61	5.03267	up	up	up	up	1.28607e-63	up	1.90593e-61	5.03267	up	--	--	Biological Process: signal transduction (GO:0007165);; Molecular Function: ADP binding (GO:0043531);;	K16225|1.0e-61|ath:AT5G45260|K16225 probable WRKY transcription factor 52 | (RefSeq) RRS1; Disease resistance protein (TIR-NBS-LRR class)	Plant-pathogen interaction (ko04626)	--	--	NB-ARC domain	Disease resistance protein Roq1 OS=Nicotiana benthamiana OX=4100 GN=ROQ1 PE=1 SV=1	S	Function unknown	PREDICTED: LOW QUALITY PROTEIN: uncharacterized protein LOC103339370 [Prunus mume]	biological process: cellular process (GO:0009987);; biological process: biological regulation (GO:0065007);; molecular function: binding (GO:0005488)
PaF106G0700027591.01	PaF106G0700027591.01	0.832261	66	1.21977	90	1.88463	161	3.94055	337	4.0793	292	2.53339	210	8.48576e-06	-1.16965	down	down	down	down	1.48787e-06	down	8.48576e-06	-1.16965	down	[IQ]	Lipid transport and metabolism;; Secondary metabolites biosynthesis, transport and catabolism	Molecular Function: CoA-ligase activity (GO:0016405);;	K01904|1.8e-290|pmum:103339831|K01904 4-coumarate--CoA ligase [EC:6.2.1.12] | (RefSeq) 4-coumarate--CoA ligase-like 7	Ubiquinone and other terpenoid-quinone biosynthesis (ko00130);; Phenylpropanoid biosynthesis (ko00940)	[I]	Lipid transport and metabolism	AMP-binding enzyme	4-coumarate--CoA ligase-like 7 OS=Arabidopsis thaliana OX=3702 GN=4CLL7 PE=1 SV=1	I	Lipid transport and metabolism	unnamed protein product [Prunus armeniaca]	molecular function: catalytic activity (GO:0003824)
PaF106G0100005229.01	PaF106G0100005229.01	0.329768	20	0.087733	5	0.530455	35	1.19984	79	1.60674	88	1.27609	81	0.000145338	-1.38364	down	down	down	down	3.28198e-05	down	0.000145338	-1.38364	down	--	--	Cellular Component: chromosome, centromeric region (GO:0000775);; Cellular Component: kinetochore (GO:0000776);; Molecular Function: molecular_function (GO:0003674);; Molecular Function: binding (GO:0005488);; Molecular Function: protein binding (GO:0005515);; Cellular Component: cellular_component (GO:0005575);; Cellular Component: intracellular (GO:0005622);; Cellular Component: cell (GO:000562…	K14963|7.6e-112|ccaj:109801591|K14963 COMPASS component SWD3 | (RefSeq) protein JINGUBANG-like	--	[R]	General function prediction only	WD domain, G-beta repeat	Protein JINGUBANG OS=Arabidopsis thaliana OX=3702 GN=JGB PE=1 SV=1	S	Function unknown	unnamed protein product [Prunus armeniaca]	cellular component: cell (GO:0005623);; cellular component: organelle (GO:0043226);; cellular component: organelle part (GO:0044422);; cellular component: cell part (GO:0044464);; cellular component: macromolecular complex (GO:0032991);; molecular function: binding (GO:0005488);; cellular component: supramolecular complex (GO:0099080);; biological process: cellular process (GO:0009987);; biologic…
PaF106G0300012958.01	PaF106G0300012958.01	2.53649	106	2.76267	107	2.4406	111	1.35344	62	0.538351	21	1.11732	49	0.000214397	1.146	up	up	up	up	5.04354e-05	up	0.000214397	1.146	up	[O]	Posttranslational modification, protein turnover, chaperones	Molecular Function: cysteine-type endopeptidase activity (GO:0004197);; Cellular Component: integral component of membrane (GO:0016021);; Biological Process: CAAX-box protein processing (GO:0071586);;	K23336|3.3e-20|smo:SELMODRAFT_439598|K23336 armadillo repeat-containing protein 8 | (RefSeq) hypothetical protein	--	--	--	CPBP intramembrane metalloprotease	--	S	Function unknown	PREDICTED: uncharacterized protein LOC103343368 isoform X2 [Prunus mume]	biological process: metabolic process (GO:0008152);; molecular function: catalytic activity (GO:0003824);; cellular component: membrane (GO:0016020);; cellular component: membrane part (GO:0044425)
PaF106G0100006520.01	PaF106G0100006520.01	14.042	671	13.6057	607	14.497	764	5.338	301	4.57768	217	4.9401	262	1.37996e-27	1.43123	up	up	up	up	3.31946e-29	up	1.37996e-27	1.43123	up	--	--	Biological Process: signal transduction (GO:0007165);; Molecular Function: ADP binding (GO:0043531);;	--	--	--	--	Leucine Rich repeats (2 copies)	--	T	Signal transduction mechanisms	TMV resistance protein N-like [Prunus avium]	biological process: cellular process (GO:0009987);; biological process: biological regulation (GO:0065007);; molecular function: binding (GO:0005488)
PaF106G0600021834.01	PaF106G0600021834.01	67.2737	5848	73.1618	5947	80.7843	7663	17.5455	1649	18.1678	1444	17.3721	1601	3.59808e-156	2.107	up	up	up	up	3.52135e-159	up	3.59808e-156	2.107	up	--	--	Biological Process: phototropism (GO:0009638);;	--	--	--	--	NPH3 family	Root phototropism protein 2 OS=Arabidopsis thaliana OX=3702 GN=RPT2 PE=1 SV=2	S	Function unknown	unnamed protein product [Prunus armeniaca]	biological process: response to stimulus (GO:0050896)
PaF106G0300011888.01	PaF106G0300011888.01	0.710752	37	0.59018	29	0.730283	42	2.60276	148	3.9257	186	3.17961	175	9.26975e-13	-1.86563	down	down	down	down	6.07351e-14	down	9.26975e-13	-1.86563	down	--	--	Cellular Component: nucleus (GO:0005634);; Cellular Component: host cell nucleus (GO:0042025);; Biological Process: regulation of cell cycle (GO:0051726);;	K18812|1.9e-170|pmum:103329497|K18812 cyclin D6, plant | (RefSeq) putative cyclin-D6-1	--	[D]	Cell cycle control, cell division, chromosome partitioning	Cyclin, N-terminal domain	Putative cyclin-D6-1 OS=Arabidopsis thaliana OX=3702 GN=CYCD6-1 PE=3 SV=1	D	Cell cycle control, cell division, chromosome partitioning	unnamed protein product [Prunus armeniaca]	cellular component: cell (GO:0005623);; cellular component: organelle (GO:0043226);; cellular component: cell part (GO:0044464);; cellular component: other organism (GO:0044215);; cellular component: other organism part (GO:0044217);; biological process: biological regulation (GO:0065007)
PaF106G0600023306.01	PaF106G0600023306.01	3.55735	161	4.32202	168	3.43856	217	1.10561	79	0.632745	35	1.0927	59	1.20404e-09	1.53812	up	up	up	up	1.12813e-10	up	1.20404e-09	1.53812	up	--	--	Molecular Function: ATP transmembrane transporter activity (GO:0005347);; Cellular Component: integral component of membrane (GO:0016021);;	K14684|1.0e-70|pmum:103320617|K14684 solute carrier family 25 (mitochondrial phosphate transporter), member 23/24/25/41 | (RefSeq) LOW QUALITY PROTEIN: mitochondrial substrate carrier family protein B-like	--	[C]	Energy production and conversion	Mitochondrial carrier protein	Mitochondrial adenine nucleotide transporter ADNT1 OS=Arabidopsis thaliana OX=3702 GN=ADNT1 PE=1 SV=1	C	Energy production and conversion	unnamed protein product [Prunus armeniaca]	biological process: single-organism process (GO:0044699);; biological process: localization (GO:0051179);; molecular function: transporter activity (GO:0005215);; cellular component: membrane (GO:0016020);; cellular component: membrane part (GO:0044425)
PaF106G0300013919.01	PaF106G0300013919.01	2.91875	626	2.33045	466	2.63258	614	0.765752	179	0.941558	184	0.881564	200	4.09646e-23	1.59766	up	up	up	up	1.31246e-24	up	4.09646e-23	1.59766	up	[V]	Defense mechanisms	Molecular Function: ATP binding (GO:0005524);; Cellular Component: integral component of membrane (GO:0016021);; Molecular Function: ATPase activity (GO:0016887);;	K08712|5.0e-144|gsl:Gasu_29800|K08712 ATP-binding cassette, subfamily G (WHITE), member 2, SNQ2 | (RefSeq) ABC transporter, ATP-binding protein	ABC transporters (ko02010)	[Q]	Secondary metabolites biosynthesis, transport and catabolism	ABC-2 type transporter	ABC transporter G family member 36 OS=Arabidopsis thaliana OX=3702 GN=ABCG36 PE=1 SV=1	Q	Secondary metabolites biosynthesis, transport and catabolism	unnamed protein product [Prunus armeniaca]	molecular function: binding (GO:0005488);; cellular component: membrane (GO:0016020);; cellular component: membrane part (GO:0044425);; molecular function: catalytic activity (GO:0003824)
PaF106G0600023887.01	PaF106G0600023887.01	2.56596	83	2.55753	78	1.992	71	1.62948	58	0.684568	21	0.339659	12	0.00584071	1.02763	up	up	up	up	0.00198291	up	0.00584071	1.02763	up	--	--	Biological Process: hydrotropism (GO:0010274);;	--	--	--	--	Protein of unknown function, DUF617	Protein MIZU-KUSSEI 1 OS=Arabidopsis thaliana OX=3702 GN=MIZ1 PE=1 SV=1	S	Function unknown	protein MIZU-KUSSEI 1-like [Prunus dulcis]	biological process: response to stimulus (GO:0050896)
PaF106G0100005692.01	PaF106G0100005692.01	22.2301	1568	22.4986	1477	19.764	1516	6.10164	471	9.47651	610	7.37686	551	6.39244e-24	1.49725	up	up	up	up	1.90588e-25	up	6.39244e-24	1.49725	up	--	--	Biological Process: amino acid transmembrane transport (GO:0003333);; Cellular Component: plasma membrane (GO:0005886);; Molecular Function: amino acid transmembrane transporter activity (GO:0015171);; Cellular Component: integral component of membrane (GO:0016021);;	--	--	[E]	Amino acid transport and metabolism	Transmembrane amino acid transporter protein	Amino acid permease 3 OS=Arabidopsis thaliana OX=3702 GN=AAP3 PE=1 SV=2	E	Amino acid transport and metabolism	unnamed protein product [Prunus armeniaca]	biological process: single-organism process (GO:0044699);; biological process: localization (GO:0051179);; cellular component: cell (GO:0005623);; cellular component: membrane (GO:0016020);; cellular component: cell part (GO:0044464);; molecular function: transporter activity (GO:0005215);; cellular component: membrane part (GO:0044425)
PaF106G0800030782.01	PaF106G0800030782.01	3.29986	172	2.67128	130	2.74211	155	0.182273	11	0.30162	15	0.051268	3	3.81904e-23	3.07084	up	up	up	up	1.21767e-24	up	3.81904e-23	3.07084	up	[T]	Signal transduction mechanisms	Molecular Function: protein serine/threonine kinase activity (GO:0004674);; Molecular Function: ATP binding (GO:0005524);; Cellular Component: plasma membrane (GO:0005886);; Biological Process: protein phosphorylation (GO:0006468);; Biological Process: cell surface receptor signaling pathway (GO:0007166);;	K23544|3.9e-34|brp:103842861|K23544 serine incorporator 1/3 | (RefSeq) serine incorporator 3	--	[T]	Signal transduction mechanisms	Protein tyrosine and serine/threonine kinase	Serine/threonine-protein kinase ZRK1 OS=Arabidopsis thaliana OX=3702 GN=ZRK1 PE=1 SV=1	T	Signal transduction mechanisms	unnamed protein product [Prunus armeniaca]	biological process: metabolic process (GO:0008152);; biological process: cellular process (GO:0009987);; molecular function: catalytic activity (GO:0003824);; molecular function: binding (GO:0005488);; cellular component: cell (GO:0005623);; cellular component: membrane (GO:0016020);; cellular component: cell part (GO:0044464);; biological process: signaling (GO:0023052);; biological process: sin…
PaF106G0400016817.01	PaF106G0400016817.01	0.245546	18	0.092781	7	0.158992	13	1.24273	100	1.14252	77	1.13017	88	6.4151e-10	-2.02542	down	down	down	down	5.79256e-11	down	6.4151e-10	-2.02542	down	--	--	Molecular Function: magnesium ion binding (GO:0000287);; Molecular Function: terpene synthase activity (GO:0010333);;	K14173|1.3e-312|pmum:103325568|K14173 alpha-farnesene synthase [EC:4.2.3.46] | (RefSeq) (E,E)-alpha-farnesene synthase-like	Sesquiterpenoid and triterpenoid biosynthesis (ko00909)	--	--	Terpene synthase family, metal binding domain	(E,E)-alpha-farnesene synthase OS=Malus domestica OX=3750 GN=AFS1 PE=1 SV=2	S	Function unknown	unnamed protein product [Prunus armeniaca]	molecular function: binding (GO:0005488);; molecular function: catalytic activity (GO:0003824)
Prunus_sibirica_newGene_265	--	37.0865	2662	32.9845	2208	33.7166	2638	15.062	1178	15.2637	997	14.7381	1117	3.55512e-40	1.25776	up	up	up	up	5.01753e-42	up	3.55512e-40	1.25776	up	--	--	Molecular Function: nucleic acid binding (GO:0003676);;	K23280|3.1e-46|sly:101257103|K23280 rhamnogalacturonan I rhamnosyltransferase [EC:2.4.1.351] | (RefSeq) uncharacterized protein LOC101257103 isoform X1	--	[R]	General function prediction only	gag-polypeptide of LTR copia-type	--	L	Replication, recombination and repair	PREDICTED: uncharacterized protein LOC103334794 [Prunus mume]	molecular function: binding (GO:0005488)
PaF106G0600022891.01	PaF106G0600022891.01	8.56026	1185	16.0339	2074	11.0716	1657	6.81142	1013	4.97631	623	4.59524	652	0.000460436	1.02157	up	up	up	up	0.000116995	up	0.000460436	1.02157	up	[T]	Signal transduction mechanisms	Molecular Function: protein serine/threonine kinase activity (GO:0004674);; Molecular Function: ATP binding (GO:0005524);; Cellular Component: plasma membrane (GO:0005886);; Biological Process: protein autophosphorylation (GO:0046777);;	K13416|1.0e-44|cam:101506449|K13416 brassinosteroid insensitive 1-associated receptor kinase 1 [EC:2.7.10.1 2.7.11.1] | (RefSeq) BRASSINOSTEROID INSENSITIVE 1-associated receptor kinase 1	MAPK signaling pathway - plant (ko04016);; Plant hormone signal transduction (ko04075);; Plant-pathogen interaction (ko04626)	--	--	Protein tyrosine and serine/threonine kinase	Probable LRR receptor-like serine/threonine-protein kinase At1g53430 OS=Arabidopsis thaliana OX=3702 GN=At1g53430 PE=1 SV=1	T	Signal transduction mechanisms	PREDICTED: probable LRR receptor-like serine/threonine-protein kinase At1g53420 [Prunus mume]	biological process: metabolic process (GO:0008152);; biological process: cellular process (GO:0009987);; molecular function: catalytic activity (GO:0003824);; molecular function: binding (GO:0005488);; cellular component: cell (GO:0005623);; cellular component: membrane (GO:0016020);; cellular component: cell part (GO:0044464)
PaF106G0700027481.01	PaF106G0700027481.01	1.34859	128	1.01411	90	1.5629	161	3.98186	411	4.04896	349	2.87098	287	7.53536e-10	-1.28057	down	down	down	down	6.88561e-11	down	7.53536e-10	-1.28057	down	--	--	Molecular Function: cysteine-type peptidase activity (GO:0008234);; Molecular Function: ADP binding (GO:0043531);;	K13415|2.8e-44|mdm:103413440|K13415 protein brassinosteroid insensitive 1 [EC:2.7.10.1 2.7.11.1] | (RefSeq) uncharacterized protein LOC103413440 isoform X1	Plant hormone signal transduction (ko04075)	--	--	NB-ARC domain	Probable disease resistance protein At5g66900 OS=Arabidopsis thaliana OX=3702 GN=At5g66900 PE=3 SV=1	S	Function unknown	unnamed protein product [Prunus armeniaca]	biological process: metabolic process (GO:0008152);; molecular function: catalytic activity (GO:0003824);; molecular function: binding (GO:0005488)
PaF106G0800030984.01	PaF106G0800030984.01	0.704662	34	0.746978	34	0.505849	27	1.92261	100	3.77175	164	2.51523	127	1.89063e-07	-1.58319	down	down	down	down	2.47357e-08	down	1.89063e-07	-1.58319	down	[E]	Amino acid transport and metabolism	Molecular Function: arylformamidase activity (GO:0004061);; Biological Process: tryptophan catabolic process to kynurenine (GO:0019441);;	--	--	--	--	Putative cyclase	Cyclase-like protein 2 OS=Arabidopsis thaliana OX=3702 GN=CYCLASE2 PE=2 SV=1	S	Function unknown	uncharacterized protein LOC110749515 [Prunus avium]	molecular function: catalytic activity (GO:0003824);; biological process: metabolic process (GO:0008152);; biological process: cellular process (GO:0009987);; biological process: single-organism process (GO:0044699)
PaF106G0100002450.01	PaF106G0100002450.01	2.0219	282	2.57112	331	3.49282	522	5.85489	877	7.29406	914	5.89985	857	1.33158e-10	-1.09966	down	down	down	down	1.10804e-11	down	1.33158e-10	-1.09966	down	[L]	Replication, recombination and repair	--	K10706|8.7e-185|vvi:100262126|K10706 senataxin [EC:3.6.4.-] | (RefSeq) uncharacterized LOC100262126	--	[A]	RNA processing and modification	AAA domain	--	A	RNA processing and modification	hypothetical protein PRUPE_1G201900 [Prunus persica]	--
PaF106G0100002006.01	PaF106G0100002006.01	0.579815	49	0.493495	39	0.405519	37	2.44532	221	1.68408	128	1.55714	137	8.89779e-09	-1.57009	down	down	down	down	9.38178e-10	down	8.89779e-09	-1.57009	down	[C]	Energy production and conversion	Molecular Function: oxidoreductase activity (GO:0016491);; Molecular Function: FAD binding (GO:0071949);;	K22395|5.6e-110|cic:CICLE_v10007008mg|K22395 cinnamyl-alcohol dehydrogenase [EC:1.1.1.195] | (RefSeq) hypothetical protein	Phenylpropanoid biosynthesis (ko00940)	--	--	FAD binding domain	Berberine bridge enzyme-like 8 OS=Arabidopsis thaliana OX=3702 GN=At1g30700 PE=2 SV=1	C	Energy production and conversion	PREDICTED: reticuline oxidase-like protein [Prunus mume]	molecular function: catalytic activity (GO:0003824);; molecular function: binding (GO:0005488)
PaF106G0600024501.01	PaF106G0600024501.01	3.17799	433	5.11438	649	3.70402	548	1.8934	245	1.84313	225	1.76898	255	1.26723e-10	1.18607	up	up	up	up	1.05156e-11	up	1.26723e-10	1.18607	up	[M]	Cell wall/membrane/envelope biogenesis	Molecular Function: protein serine/threonine kinase activity (GO:0004674);; Molecular Function: ATP binding (GO:0005524);; Cellular Component: integral component of membrane (GO:0016021);;	K20181|5.5e-110|mtr:MTR_5g026090|K20181 vacuolar protein sorting-associated protein 18 | (RefSeq) vacuolar sorting-associated-like protein	--	--	--	Protein kinase domain	Receptor kinase-like protein Xa21 OS=Oryza sativa subsp. indica OX=39946 GN=XA21 PE=1 SV=1	T	Signal transduction mechanisms	probable LRR receptor-like serine/threonine-protein kinase At3g47570 isoform X1 [Prunus avium]	biological process: metabolic process (GO:0008152);; biological process: cellular process (GO:0009987);; molecular function: catalytic activity (GO:0003824);; molecular function: binding (GO:0005488);; cellular component: membrane (GO:0016020);; cellular component: membrane part (GO:0044425)
PaF106G0200007538.01	PaF106G0200007538.01	1.44049	99	1.53344	98	2.0369	152	0.418178	32	0.50173	32	0.31316	23	2.18915e-09	1.71686	up	up	up	up	2.12555e-10	up	2.18915e-09	1.71686	up	--	--	--	--	--	--	--	--	--	--	--	cold shock domain protein 1, partial [Prunus dulcis]	--
PaF106G0100004527.01	PaF106G0100004527.01	6.17582	278	4.43182	186	3.91776	192	0.826581	41	1.44629	60	1.27872	61	6.87245e-12	1.80611	up	up	up	up	4.88513e-13	up	6.87245e-12	1.80611	up	--	--	Molecular Function: calcium channel activity (GO:0005262);; Cellular Component: mitochondrial inner membrane (GO:0005743);; Molecular Function: uniporter activity (GO:0015292);; Cellular Component: integral component of membrane (GO:0016021);; Biological Process: mitochondrial calcium ion homeostasis (GO:0051560);;	K20858|1.2e-178|pper:18790349|K20858 calcium uniporter protein, mitochondrial | (RefSeq) calcium uniporter protein 4, mitochondrial	--	[R]	General function prediction only	Mitochondrial calcium uniporter	Calcium uniporter protein 2, mitochondrial OS=Arabidopsis thaliana OX=3702 GN=At2g23790 PE=2 SV=1	S	Function unknown	unnamed protein product [Prunus armeniaca]	biological process: localization (GO:0051179);; molecular function: transporter activity (GO:0005215);; cellular component: cell (GO:0005623);; cellular component: membrane (GO:0016020);; cellular component: organelle (GO:0043226);; cellular component: organelle part (GO:0044422);; cellular component: cell part (GO:0044464);; cellular component: membrane part (GO:0044425);; biological process: ce…
PaF106G0400015293.01	PaF106G0400015293.01	0	0	0	0	0	0	0.501583	54	0.447598	40	0.428898	45	9.14333e-13	-2.69652	down	down	down	down	5.97656e-14	down	9.14333e-13	-2.69652	down	--	--	Molecular Function: cysteine-type peptidase activity (GO:0008234);;	K12235|6.5e-14|pavi:110763563|K12235 serine racemase [EC:5.1.1.18] | (RefSeq) uncharacterized protein LOC110763563 isoform X1	Glycine, serine and threonine metabolism (ko00260)	--	--	Ulp1 protease family, C-terminal catalytic domain	--	S	Function unknown	PREDICTED: PRUPE_6G193600, partial [Prunus dulcis]	biological process: metabolic process (GO:0008152);; molecular function: catalytic activity (GO:0003824)
PaF106G0400016431.01	PaF106G0400016431.01	0.413214	32	0.361843	27	0.404072	34	2.52877	213	2.91726	206	2.49865	204	6.37363e-23	-2.34837	down	down	down	down	2.06829e-24	down	6.37363e-23	-2.34837	down	[QV]	Secondary metabolites biosynthesis, transport and catabolism;; Defense mechanisms	Molecular Function: monooxygenase activity (GO:0004497);; Molecular Function: iron ion binding (GO:0005506);; Molecular Function: oxidoreductase activity, acting on paired donors, with incorporation or reduction of molecular oxygen (GO:0016705);; Molecular Function: heme binding (GO:0020037);;	K07426|2.5e-62|cpep:111792333|K07426 cytochrome P450 family 4 subfamily B polypeptide 1 [EC:1.14.14.1] | (RefSeq) cytochrome P450 CYP72A219-like	--	[QI]	Secondary metabolites biosynthesis, transport and catabolism;; Lipid transport and metabolism	Cytochrome P450	Cytochrome P450 CYP72A219 OS=Panax ginseng OX=4054 PE=2 SV=1	Q	Secondary metabolites biosynthesis, transport and catabolism	unnamed protein product [Prunus armeniaca]	biological process: metabolic process (GO:0008152);; biological process: single-organism process (GO:0044699);; molecular function: catalytic activity (GO:0003824);; molecular function: binding (GO:0005488)
PaF106G0800032199.01	PaF106G0800032199.01	0.919658	56	0.6679	38	0.801162	53	0.102544	7	0.038729	3	0.193106	13	3.87713e-06	1.72436	up	up	up	up	6.37268e-07	up	3.87713e-06	1.72436	up	--	--	Molecular Function: aspartic-type endopeptidase activity (GO:0004190);; Biological Process: proteolysis (GO:0006508);; Biological Process: protein catabolic process (GO:0030163);;	K22683|4.6e-48|mus:103977055|K22683 aspartyl protease family protein [EC:3.4.23.-] | (RefSeq) aspartic proteinase nepenthesin-2-like	--	[O]	Posttranslational modification, protein turnover, chaperones	Xylanase inhibitor C-terminal	Probable aspartyl protease At4g16563 OS=Arabidopsis thaliana OX=3702 GN=At4g16563 PE=2 SV=1	O	Posttranslational modification, protein turnover, chaperones	unnamed protein product [Prunus armeniaca]	biological process: metabolic process (GO:0008152);; molecular function: catalytic activity (GO:0003824)
PaF106G0400018270.01	PaF106G0400018270.01	0.048378	6	0	0	0.03624	5	0.508488	62	0.470264	48	0.40544	48	1.73476e-08	-2.11626	down	down	down	down	1.91222e-09	down	1.73476e-08	-2.11626	down	[O]	Posttranslational modification, protein turnover, chaperones	Molecular Function: serine-type endopeptidase activity (GO:0004252);;	K15333|1.4e-177|nsy:104224633|K15333 tRNA guanosine-2'-O-methyltransferase [EC:2.1.1.34] | (RefSeq) uncharacterized protein LOC104224633	--	--	--	Subtilase family	Subtilisin-like protease SBT2.4 OS=Arabidopsis thaliana OX=3702 GN=SBT2.4 PE=1 SV=1	O	Posttranslational modification, protein turnover, chaperones	PREDICTED: subtilisin-like protease SBT2.4 [Prunus mume]	biological process: metabolic process (GO:0008152);; molecular function: catalytic activity (GO:0003824)
PaF106G0300011931.01	PaF106G0300011931.01	0.838441	65	1.06936	77	0.595542	50	0.187091	16	0.091081	7	0.052276	5	1.1589e-07	1.91438	up	up	up	up	1.45056e-08	up	1.1589e-07	1.91438	up	--	--	--	K11843|1.1e-11|aip:110267024|K11843 ubiquitin carboxyl-terminal hydrolase 14 [EC:3.4.19.12] | (RefSeq) FBD-associated F-box protein At4g10400-like	--	--	--	FBD	F-box/LRR-repeat protein 25 OS=Arabidopsis thaliana OX=3702 GN=FBL25 PE=2 SV=1	S	Function unknown	unnamed protein product [Prunus armeniaca]	--
PaF106G0100005824.01	PaF106G0100005824.01	57.1494	4433	58.9266	4269	59.4617	5020	26.3068	2070	22.2434	1571	22.9315	1876	5.51274e-75	1.39133	up	up	up	up	2.78278e-77	up	5.51274e-75	1.39133	up	[G]	Carbohydrate transport and metabolism	Molecular Function: UDP-glycosyltransferase activity (GO:0008194);; Cellular Component: intracellular membrane-bounded organelle (GO:0043231);; Molecular Function: quercetin 3-O-glucosyltransferase activity (GO:0080043);; Molecular Function: quercetin 7-O-glucosyltransferase activity (GO:0080044);;	K13691|3.1e-150|jre:108988962|K13691 pathogen-inducible salicylic acid glucosyltransferase [EC:2.4.1.-] | (RefSeq) UDP-glycosyltransferase 74F2-like	--	[GC]	Carbohydrate transport and metabolism;; Energy production and conversion	UDP-glucoronosyl and UDP-glucosyl transferase	UDP-glycosyltransferase 74E2 OS=Arabidopsis thaliana OX=3702 GN=UGT74E2 PE=1 SV=1	--	--	unnamed protein product [Prunus armeniaca]	molecular function: catalytic activity (GO:0003824);; cellular component: cell (GO:0005623);; cellular component: organelle (GO:0043226);; cellular component: cell part (GO:0044464)
Prunus_sibirica_newGene_267	--	5.49654	358	5.00027	304	5.87949	417	0.184261	14	0.265335	16	0.086786	6	8.52998e-66	4.25033	up	up	up	up	5.00885e-68	up	8.52998e-66	4.25033	up	[M]	Cell wall/membrane/envelope biogenesis	Molecular Function: protein serine/threonine kinase activity (GO:0004674);; Molecular Function: ATP binding (GO:0005524);; Biological Process: recognition of pollen (GO:0048544);;	K24104|2.5e-63|thj:104799061|K24104 GPN-loop GTPase | (RefSeq) LOW QUALITY PROTEIN: uncharacterized protein LOC104799061	--	--	--	Protein tyrosine and serine/threonine kinase	G-type lectin S-receptor-like serine/threonine-protein kinase At1g61500 OS=Arabidopsis thaliana OX=3702 GN=At1g61500 PE=2 SV=2	S	Function unknown	LOW QUALITY PROTEIN: uncharacterized protein LOC18781188 [Prunus persica]	biological process: metabolic process (GO:0008152);; biological process: cellular process (GO:0009987);; molecular function: catalytic activity (GO:0003824);; molecular function: binding (GO:0005488);; biological process: reproduction (GO:0000003);; biological process: reproductive process (GO:0022414);; biological process: single-organism process (GO:0044699)
PaF106G0400017686.01	PaF106G0400017686.01	0.563019	69	0.6553	75	0.482647	64	0.129501	18	0.161751	18	0.060898	8	8.73279e-07	1.68915	up	up	up	up	1.26939e-07	up	8.73279e-07	1.68915	up	--	--	Cellular Component: plasma membrane (GO:0005886);; Molecular Function: ligand-gated ion channel activity (GO:0015276);; Cellular Component: integral component of membrane (GO:0016021);; Molecular Function: signaling receptor activity (GO:0038023);;	K05387|2.8e-130|pxb:103938632|K05387 glutamate receptor, ionotropic, plant | (RefSeq) glutamate receptor 2.7-like	--	--	--	Receptor family ligand binding region	--	--	--	unnamed protein product [Prunus armeniaca]	cellular component: cell (GO:0005623);; cellular component: membrane (GO:0016020);; cellular component: cell part (GO:0044464);; biological process: localization (GO:0051179);; molecular function: transporter activity (GO:0005215);; molecular function: molecular transducer activity (GO:0060089);; cellular component: membrane part (GO:0044425);; biological process: cellular process (GO:0009987);; …
PaF106G0700026433.01	PaF106G0700026433.01	2.01875	108	2.51972	126	2.73141	159	6.75164	392	7.42527	361	3.57701	202	1.4789e-05	-1.06997	down	down	down	down	2.72181e-06	down	1.4789e-05	-1.06997	down	[K]	Transcription	Molecular Function: GTPase activity (GO:0003924);; Molecular Function: GTP binding (GO:0005525);; Biological Process: small GTPase mediated signal transduction (GO:0007264);;	K04392|1.8e-116|pmum:103340893|K04392 Ras-related C3 botulinum toxin substrate 1 | (RefSeq) rac-like GTP-binding protein ARAC7	Phagosome (ko04145)	[R]	General function prediction only	Ras family	Rac-like GTP-binding protein ARAC7 OS=Arabidopsis thaliana OX=3702 GN=ARAC7 PE=1 SV=1	S	Function unknown	PREDICTED: rac-like GTP-binding protein ARAC7 [Prunus mume]	molecular function: catalytic activity (GO:0003824);; molecular function: binding (GO:0005488);; biological process: cellular process (GO:0009987);; biological process: signaling (GO:0023052);; biological process: single-organism process (GO:0044699);; biological process: response to stimulus (GO:0050896);; biological process: biological regulation (GO:0065007)
PaF106G0700028405.01	PaF106G0700028405.01	0.488223	58	0.930353	103	0.705774	91	0.266466	35	0.218669	24	0.242601	31	8.68503e-05	1.25331	up	up	up	up	1.86996e-05	up	8.68503e-05	1.25331	up	--	--	Biological Process: defense response (GO:0006952);; Molecular Function: ADP binding (GO:0043531);;	K15078|1.2e-70|tcc:18614561|K15078 structure-specific endonuclease subunit SLX1 [EC:3.6.1.-] | (RefSeq) putative disease resistance protein RGA3	--	[T]	Signal transduction mechanisms	NB-ARC domain	Putative disease resistance protein RGA3 OS=Solanum bulbocastanum OX=147425 GN=RGA3 PE=2 SV=2	T	Signal transduction mechanisms	putative disease resistance protein RGA1 [Prunus persica]	biological process: response to stimulus (GO:0050896);; molecular function: binding (GO:0005488)
PaF106G0300012238.01	PaF106G0300012238.01	0.244943	22	0.250668	21	0.270153	26	1.70363	162	1.35226	108	1.67433	154	1.13904e-14	-2.1187	down	down	down	down	6.35995e-16	down	1.13904e-14	-2.1187	down	--	--	Cellular Component: integral component of membrane (GO:0016021);;	--	--	[R]	General function prediction only	Leucine rich repeat	Receptor-like protein 38 OS=Arabidopsis thaliana OX=3702 GN=RLP38 PE=3 SV=1	B	Chromatin structure and dynamics	hypothetical protein PRUPE_3G196000 [Prunus persica]	cellular component: membrane (GO:0016020);; cellular component: membrane part (GO:0044425)
Prunus_sibirica_newGene_1860	--	0.311064	21	0.060686	4	0.054832	5	1.29373	95	1.26042	78	0.622093	45	1.78804e-05	-1.63465	down	down	down	down	3.35246e-06	down	1.78804e-05	-1.63465	down	--	--	--	K08081|8.4e-14|thj:104827446|K08081 tropinone reductase I [EC:1.1.1.206] | (RefSeq) tropinone reductase homolog At5g06060-like	Tropane, piperidine and pyridine alkaloid biosynthesis (ko00960)	--	--	C2H2-type zinc finger	Transcriptional regulator SUPERMAN OS=Arabidopsis thaliana OX=3702 GN=SUP PE=1 SV=1	S	Function unknown	unnamed protein product [Prunus armeniaca]	--
PaF106G0700028629.01	PaF106G0700028629.01	4.75375	242	5.3584	269	5.99411	327	1.87158	89	1.8619	76	1.27475	59	3.23625e-18	1.81747	up	up	up	up	1.37858e-19	up	3.23625e-18	1.81747	up	[T]	Signal transduction mechanisms	Molecular Function: protein kinase activity (GO:0004672);; Molecular Function: ATP binding (GO:0005524);;	K13414|5.4e-79|pop:7460930|K13414 mitogen-activated protein kinase kinase kinase 1 [EC:2.7.11.25] | (RefSeq) mitogen-activated protein kinase kinase kinase 1	MAPK signaling pathway - plant (ko04016);; Plant-pathogen interaction (ko04626)	[T]	Signal transduction mechanisms	Protein kinase domain	Mitogen-activated protein kinase kinase kinase 1 OS=Arabidopsis thaliana OX=3702 GN=MEKK1 PE=1 SV=2	T	Signal transduction mechanisms	PREDICTED: mitogen-activated protein kinase kinase kinase 1-like isoform X2 [Prunus mume]	biological process: metabolic process (GO:0008152);; biological process: cellular process (GO:0009987);; molecular function: catalytic activity (GO:0003824);; molecular function: binding (GO:0005488)
Prunus_sibirica_newGene_1238	--	4.64229	327	3.74492	240	4.08598	304	0.1177	10	0.103068	7	0	0	2.74907e-09	2.27979	up	up	up	up	2.70354e-10	up	2.74907e-09	2.27979	up	--	--	--	K12447|4.3e-57|csat:109127935|K12447 UDP-sugar pyrophosphorylase [EC:2.7.7.64] | (RefSeq) uncharacterized protein LOC109127935	Pentose and glucuronate interconversions (ko00040);; Galactose metabolism (ko00052);; Ascorbate and aldarate metabolism (ko00053);; Amino sugar and nucleotide sugar metabolism (ko00520)	[R]	General function prediction only	gag-polypeptide of LTR copia-type	--	L	Replication, recombination and repair	uncharacterized protein LOC109947549 isoform X1 [Prunus persica]	--
PaF106G0800030157.01	PaF106G0800030157.01	1.23204	57	1.18527	51	1.08319	54	0.100062	5	0.173506	8	0.039101	2	3.88358e-09	2.15546	up	up	up	up	3.91079e-10	up	3.88358e-09	2.15546	up	--	--	Molecular Function: hydrolase activity, hydrolyzing O-glycosyl compounds (GO:0004553);; Cellular Component: cell wall (GO:0005618);; Biological Process: xyloglucan metabolic process (GO:0010411);; Cellular Component: integral component of membrane (GO:0016021);; Molecular Function: xyloglucan:xyloglucosyl transferase activity (GO:0016762);; Biological Process: cell wall biogenesis (GO:0042546);; …	K08235|2.1e-66|pper:18767980|K08235 xyloglucan:xyloglucosyl transferase [EC:2.4.1.207] | (RefSeq) xyloglucan endotransglucosylase/hydrolase protein 2	--	--	--	Glycosyl hydrolases family 16	Xyloglucan endotransglucosylase/hydrolase protein 2 OS=Arabidopsis thaliana OX=3702 GN=XTH2 PE=2 SV=1	G	Carbohydrate transport and metabolism	xyloglucan endotransglucosylase/hydrolase 2 [Prunus dulcis]	molecular function: catalytic activity (GO:0003824);; cellular component: cell (GO:0005623);; cellular component: cell part (GO:0044464);; biological process: metabolic process (GO:0008152);; biological process: cellular process (GO:0009987);; cellular component: membrane (GO:0016020);; cellular component: membrane part (GO:0044425);; biological process: cellular component organization or biogene…
PaF106G0600021563.01	PaF106G0600021563.01	1.65875	191	1.64958	177	1.77972	223	0.129709	17	0.123601	13	0.076233	10	5.18976e-36	3.32287	up	up	up	up	8.39386e-38	up	5.18976e-36	3.32287	up	--		Molecular Function: protein serine/threonine kinase activity (GO:0004674);; Molecular Function: ATP binding (GO:0005524);; Cellular Component: integral component of membrane (GO:0016021);; Molecular Function: carbohydrate binding (GO:0030246);; Biological Process: recognition of pollen (GO:0048544);;	K13416|3.0e-58|mdm:103416332|K13416 brassinosteroid insensitive 1-associated receptor kinase 1 [EC:2.7.10.1 2.7.11.1] | (RefSeq) BRASSINOSTEROID INSENSITIVE 1-associated receptor kinase 1-like isoform X1	MAPK signaling pathway - plant (ko04016);; Plant hormone signal transduction (ko04075);; Plant-pathogen interaction (ko04626)	--	--	Protein kinase domain	G-type lectin S-receptor-like serine/threonine-protein kinase RLK1 OS=Arabidopsis thaliana OX=3702 GN=RLK1 PE=2 SV=2	T	Signal transduction mechanisms	PREDICTED: G-type lectin S-receptor-like serine/threonine-protein kinase RLK1 [Prunus mume]	biological process: metabolic process (GO:0008152);; biological process: cellular process (GO:0009987);; molecular function: catalytic activity (GO:0003824);; molecular function: binding (GO:0005488);; cellular component: membrane (GO:0016020);; cellular component: membrane part (GO:0044425);; biological process: reproduction (GO:0000003);; biological process: reproductive process (GO:0022414);; …
PaF106G0800030809.01	PaF106G0800030809.01	0.181843	16	0.279828	21	0.409244	39	1.7601	149	1.05968	83	1.62014	127	2.84319e-08	-1.7149	down	down	down	down	3.2263e-09	down	2.84319e-08	-1.7149	down	--	--	Molecular Function: serine-type carboxypeptidase activity (GO:0004185);; Molecular Function: transferase activity, transferring acyl groups other than amino-acyl groups (GO:0016747);; Biological Process: secondary metabolic process (GO:0019748);;	K16296|4.8e-282|pmum:103335072|K16296 serine carboxypeptidase-like clade I [EC:3.4.16.-] | (RefSeq) serine carboxypeptidase-like 13 isoform X2	--	[OE]	Posttranslational modification, protein turnover, chaperones;; Amino acid transport and metabolism	Serine carboxypeptidase	Serine carboxypeptidase-like 18 OS=Arabidopsis thaliana OX=3702 GN=SCPL18 PE=2 SV=2	--	--	PREDICTED: serine carboxypeptidase-like 13 isoform X2 [Prunus mume]	biological process: metabolic process (GO:0008152);; molecular function: catalytic activity (GO:0003824);; biological process: single-organism process (GO:0044699)
PaF106G0700026733.01	PaF106G0700026733.01	0.839541	53	1.66521	103	1.37527	99	3.20659	225	4.48369	265	2.11811	144	0.000353963	-1.04149	down	down	down	down	8.72966e-05	down	0.000353963	-1.04149	down	--	--	Molecular Function: ATP binding (GO:0005524);; Cellular Component: nucleus (GO:0005634);; Biological Process: transcription, DNA-templated (GO:0006351);; Biological Process: regulation of transcription, DNA-templated (GO:0006355);; Biological Process: developmental process (GO:0032502);;	K22382|5.7e-12|oeu:111408549|K22382 WD repeat-containing protein 26 | (RefSeq) WD repeat-containing protein 26 homolog	--	--	--	WRC	Growth-regulating factor 1 OS=Oryza sativa subsp. indica OX=39946 GN=GRF1 PE=2 SV=1	K	Transcription	unnamed protein product [Prunus armeniaca]	molecular function: binding (GO:0005488);; cellular component: cell (GO:0005623);; cellular component: organelle (GO:0043226);; cellular component: cell part (GO:0044464);; biological process: metabolic process (GO:0008152);; biological process: cellular process (GO:0009987);; biological process: biological regulation (GO:0065007);; biological process: developmental process (GO:0032502)
PaF106G0100005870.01	PaF106G0100005870.01	2.60345	218	2.29753	179	3.16609	288	0	0	0	0	0	0	4.0854e-56	5.07886	up	up	up	up	3.32488e-58	up	4.0854e-56	5.07886	up	--	--	Molecular Function: protein binding (GO:0005515);;	K23002|5.6e-11|bvg:104898024|K23002 RNA polymerase II-associated protein 3 | (RefSeq) F-box protein At1g49990	--	[O]	Posttranslational modification, protein turnover, chaperones	F-box-like	Calreticulin-3 OS=Arabidopsis thaliana OX=3702 GN=CRT3 PE=1 SV=2	--	--	uncharacterized protein LOC110753452 [Prunus avium]	molecular function: binding (GO:0005488)
PaF106G0200008357.01	PaF106G0200008357.01	1.12104	172	1.11006	159	0.974214	163	0.154925	26	0.08375	12	0.138361	23	4.58548e-22	2.61775	up	up	up	up	1.5518e-23	up	4.58548e-22	2.61775	up	[R]	General function prediction only	Biological Process: signal transduction (GO:0007165);; Molecular Function: ADP binding (GO:0043531);;	K00695|2.9e-115|mtr:MTR_6g478030|K00695 sucrose synthase [EC:2.4.1.13] | (RefSeq) sucrose synthase	Starch and sucrose metabolism (ko00500)	--	--	TIR domain	Disease resistance protein RUN1 OS=Vitis rotundifolia OX=103349 GN=RUN1 PE=1 SV=1	S	Function unknown	TMV resistance protein N isoform X1 [Prunus persica]	biological process: cellular process (GO:0009987);; biological process: biological regulation (GO:0065007);; molecular function: binding (GO:0005488)
PaF106G0300012858.01	PaF106G0300012858.01	0.088483	8	0.209491	16	0	0	0.823235	74	0.695982	52	0.619625	54	0.000275128	-1.43383	down	down	down	down	6.63373e-05	down	0.000275128	-1.43383	down	--		Molecular Function: protein kinase activity (GO:0004672);; Molecular Function: ATP binding (GO:0005524);; Cellular Component: integral component of membrane (GO:0016021);;	K13416|1.2e-49|ccaj:109804867|K13416 brassinosteroid insensitive 1-associated receptor kinase 1 [EC:2.7.10.1 2.7.11.1] | (RefSeq) BRASSINOSTEROID INSENSITIVE 1-associated receptor kinase 1-like	MAPK signaling pathway - plant (ko04016);; Plant hormone signal transduction (ko04075);; Plant-pathogen interaction (ko04626)	--	--	Protein kinase domain	PR5-like receptor kinase OS=Arabidopsis thaliana OX=3702 GN=PR5K PE=1 SV=1	T	Signal transduction mechanisms	unnamed protein product [Prunus armeniaca]	biological process: metabolic process (GO:0008152);; biological process: cellular process (GO:0009987);; molecular function: catalytic activity (GO:0003824);; molecular function: binding (GO:0005488);; cellular component: membrane (GO:0016020);; cellular component: membrane part (GO:0044425)
PaF106G0500020435.01	PaF106G0500020435.01	11.5091	971	10.4931	826	14.6814	1347	39.4774	3625	38.029	2918	30.395	2706	1.18537e-30	-1.43895	down	down	down	down	2.41787e-32	down	1.18537e-30	-1.43895	down	--	--	Molecular Function: iron ion binding (GO:0005506);; Cellular Component: membrane (GO:0016020);; Cellular Component: integral component of membrane (GO:0016021);; Molecular Function: oxidoreductase activity, acting on paired donors, with incorporation or reduction of molecular oxygen, NAD(P)H as one donor, and incorporation of one atom of oxygen (GO:0016709);; Molecular Function: heme binding (GO:…	K00495|3.8e-137|pmum:103337951|K00495 phenylacetaldehyde oxime monooxygenase [EC:1.14.14.44] | (RefSeq) cytochrome P450 71A1-like	Cyanoamino acid metabolism (ko00460)	[Q]	Secondary metabolites biosynthesis, transport and catabolism	Cytochrome P450	Phenylacetaldehyde oxime monooxygenase CYP71AN24 OS=Prunus mume OX=102107 GN=CYP71AN24 PE=1 SV=1	Q	Secondary metabolites biosynthesis, transport and catabolism	cytochrome P450 71A1-like [Prunus mume]	molecular function: binding (GO:0005488);; cellular component: membrane (GO:0016020);; cellular component: membrane part (GO:0044425);; biological process: metabolic process (GO:0008152);; biological process: single-organism process (GO:0044699);; molecular function: catalytic activity (GO:0003824)
PaF106G0100001357.01	PaF106G0100001357.01	90.957	5478	75.0386	4213	65.3692	4280	31.487	2064	35.6682	1953	37.1061	2359	2.27923e-19	1.18786	up	up	up	up	9.01641e-21	up	2.27923e-19	1.18786	up	[IR]	Lipid transport and metabolism;; General function prediction only	Molecular Function: hydrolase activity, acting on ester bonds (GO:0016788);;	K00679|1.6e-51|cic:CICLE_v10027727mg|K00679 phospholipid:diacylglycerol acyltransferase [EC:2.3.1.158] | (RefSeq) hypothetical protein	Glycerolipid metabolism (ko00561)	--	--	GDSL-like Lipase/Acylhydrolase	GDSL esterase/lipase At4g16230 OS=Arabidopsis thaliana OX=3702 GN=At4g16230 PE=3 SV=2	I	Lipid transport and metabolism	PREDICTED: GDSL esterase/lipase At4g16230-like [Prunus mume]	molecular function: catalytic activity (GO:0003824)
PaF106G0300013674.01	PaF106G0300013674.01	0.026119	5	0.174406	26	0.102399	18	1.36538	229	0.869799	122	0.926591	151	7.68847e-14	-2.42025	down	down	down	down	4.66916e-15	down	7.68847e-14	-2.42025	down	[K]	Transcription	Biological Process: defense response (GO:0006952);; Molecular Function: ADP binding (GO:0043531);;	K15078|2.4e-106|tcc:18614561|K15078 structure-specific endonuclease subunit SLX1 [EC:3.6.1.-] | (RefSeq) putative disease resistance protein RGA3	--	[T]	Signal transduction mechanisms	NB-ARC domain	Putative disease resistance protein RGA3 OS=Solanum bulbocastanum OX=147425 GN=RGA3 PE=2 SV=2	T	Signal transduction mechanisms	unnamed protein product [Prunus armeniaca]	biological process: response to stimulus (GO:0050896);; molecular function: binding (GO:0005488)
PaF106G0200007143.01	PaF106G0200007143.01	0.286632	56	0.404472	74	0.373852	79	0.019356	5	0.059876	11	0.013425	3	1.21015e-10	2.2912	up	up	up	up	1.00357e-11	up	1.21015e-10	2.2912	up	[R]	General function prediction only	Biological Process: defense response (GO:0006952);; Molecular Function: ADP binding (GO:0043531);;	K12818|4.1e-158|mtr:MTR_0267s0070|K12818 ATP-dependent RNA helicase DHX8/PRP22 [EC:3.6.4.13] | (RefSeq) NB-ARC domain disease resistance protein, putative	Spliceosome (ko03040)	[T]	Signal transduction mechanisms	NB-ARC domain	Putative disease resistance RPP13-like protein 1 OS=Arabidopsis thaliana OX=3702 GN=RPPL1 PE=3 SV=1	T	Signal transduction mechanisms	PREDICTED: putative disease resistance RPP13-like protein 1 [Prunus mume]	biological process: response to stimulus (GO:0050896);; molecular function: binding (GO:0005488)
PaF106G0100002724.01	PaF106G0100002724.01	13.2735	1031	16.5232	1187	14.7397	1227	8.50971	694	6.50167	434	6.55555	516	2.86709e-16	1.12944	up	up	up	up	1.40298e-17	up	2.86709e-16	1.12944	up	--	--	Molecular Function: DNA binding (GO:0003677);; Cellular Component: nucleus (GO:0005634);; Cellular Component: host cell nucleus (GO:0042025);; Molecular Function: metal ion binding (GO:0046872);;	K13415|2.2e-17|mdm:103413440|K13415 protein brassinosteroid insensitive 1 [EC:2.7.10.1 2.7.11.1] | (RefSeq) uncharacterized protein LOC103413440 isoform X1	Plant hormone signal transduction (ko04075)	--	--	SBP domain	Squamosa promoter-binding-like protein 13A OS=Arabidopsis thaliana OX=3702 GN=SPL13A PE=1 SV=1	K	Transcription	unnamed protein product [Prunus armeniaca]	molecular function: binding (GO:0005488);; cellular component: cell (GO:0005623);; cellular component: organelle (GO:0043226);; cellular component: cell part (GO:0044464);; cellular component: other organism (GO:0044215);; cellular component: other organism part (GO:0044217)
PaF106G0200007192.01	PaF106G0200007192.01	2.89539	131	3.02821	131	2.96824	148	0.839911	43	1.07649	47	1.23315	59	1.42956e-07	1.34783	up	up	up	up	1.82101e-08	up	1.42956e-07	1.34783	up	--	--	Molecular Function: calcium ion binding (GO:0005509);; Molecular Function: calcium-dependent phospholipid binding (GO:0005544);;	K17098|3.8e-87|pmum:103343529|K17098 annexin D | (RefSeq) annexin-like protein RJ4 isoform X1	--	[U]	Intracellular trafficking, secretion, and vesicular transport	Annexin	Annexin-like protein RJ4 OS=Fragaria ananassa OX=3747 PE=2 SV=2	U	Intracellular trafficking, secretion, and vesicular transport	unnamed protein product [Prunus armeniaca]	molecular function: binding (GO:0005488)
PaF106G0500019643.01	PaF106G0500019643.01	1.96928	91	2.06714	89	2.38257	120	1.02537	52	0.781273	33	1.10501	54	0.00032228	1.01869	up	up	up	up	7.87855e-05	up	0.00032228	1.01869	up	[IQR]	Lipid transport and metabolism;; Secondary metabolites biosynthesis, transport and catabolism;; General function prediction only	Cellular Component: membrane (GO:0016020);; Biological Process: oxidation-reduction process (GO:0055114);;	K15095|7.0e-162|pmum:103337493|K15095 (+)-neomenthol dehydrogenase [EC:1.1.1.208] | (RefSeq) salutaridine reductase-like	Monoterpenoid biosynthesis (ko00902)	[Q]	Secondary metabolites biosynthesis, transport and catabolism	short chain dehydrogenase	Salutaridine reductase OS=Papaver bracteatum OX=215227 GN=SALR PE=1 SV=1	Q	Secondary metabolites biosynthesis, transport and catabolism	PREDICTED: salutaridine reductase-like [Prunus mume]	cellular component: membrane (GO:0016020);; biological process: metabolic process (GO:0008152);; biological process: single-organism process (GO:0044699)
PaF106G0200007469.01	PaF106G0200007469.01	5.62808	375	6.40746	398	7.59897	550	19.4836	1410	17.0922	1034	16.7312	1174	3.93231e-26	-1.32702	down	down	down	down	1.04921e-27	down	3.93231e-26	-1.32702	down	--	--	Molecular Function: transferase activity, transferring acyl groups other than amino-acyl groups (GO:0016747);;	K13065|1.6e-88|pavi:110771447|K13065 shikimate O-hydroxycinnamoyltransferase [EC:2.3.1.133] | (RefSeq) BAHD acyltransferase At5g47980-like	Phenylpropanoid biosynthesis (ko00940);; Flavonoid biosynthesis (ko00941);; Stilbenoid, diarylheptanoid and gingerol biosynthesis (ko00945)	--	--	Transferase family	BAHD acyltransferase BIA1 OS=Arabidopsis thaliana OX=3702 GN=BIA1 PE=2 SV=1	S	Function unknown	PREDICTED: BAHD acyltransferase At5g47980-like [Prunus mume]	molecular function: catalytic activity (GO:0003824)
PaF106G0600024431.01	PaF106G0600024431.01	21.5318	2198	23.0767	2199	29.8452	3316	57.8199	6424	60.6948	5630	49.0581	5287	1.25727e-21	-1.07199	down	down	down	down	4.38431e-23	down	1.25727e-21	-1.07199	down	[T]	Signal transduction mechanisms	Biological Process: phosphorelay signal transduction system (GO:0000160);; Cellular Component: nucleus (GO:0005634);;	K12129|0.0e+00|pmum:103340410|K12129 pseudo-response regulator 7 | (RefSeq) two-component response regulator-like APRR7 isoform X1	Circadian rhythm - plant (ko04712)	[K]	Transcription	Response regulator receiver domain	Two-component response regulator-like APRR7 OS=Arabidopsis thaliana OX=3702 GN=APRR7 PE=1 SV=1	K	Transcription	unnamed protein product [Prunus armeniaca]	biological process: cellular process (GO:0009987);; biological process: signaling (GO:0023052);; biological process: single-organism process (GO:0044699);; biological process: response to stimulus (GO:0050896);; biological process: biological regulation (GO:0065007);; cellular component: cell (GO:0005623);; cellular component: organelle (GO:0043226);; cellular component: cell part (GO:0044464)
PaF106G0200010499.01	PaF106G0200010499.01	4.02243	279	3.95587	256	3.91801	296	1.79887	136	1.31897	84	1.10483	81	7.01986e-12	1.43491	up	up	up	up	4.99714e-13	up	7.01986e-12	1.43491	up	[QV]	Secondary metabolites biosynthesis, transport and catabolism;; Defense mechanisms	Molecular Function: monooxygenase activity (GO:0004497);; Molecular Function: iron ion binding (GO:0005506);; Cellular Component: integral component of membrane (GO:0016021);; Molecular Function: oxidoreductase activity, acting on paired donors, with incorporation or reduction of molecular oxygen (GO:0016705);; Molecular Function: heme binding (GO:0020037);;	K07425|2.8e-190|nau:109241958|K07425 long-chain fatty acid omega-monooxygenase [EC:1.14.14.80] | (RefSeq) cytokinin hydroxylase-like	Fatty acid degradation (ko00071);; Arachidonic acid metabolism (ko00590)	[QI]	Secondary metabolites biosynthesis, transport and catabolism;; Lipid transport and metabolism	Cytochrome P450	Cytochrome P450 714C2 OS=Oryza sativa subsp. japonica OX=39947 GN=CYP714C2 PE=2 SV=1	Q	Secondary metabolites biosynthesis, transport and catabolism	unnamed protein product [Prunus armeniaca]	biological process: metabolic process (GO:0008152);; biological process: single-organism process (GO:0044699);; molecular function: catalytic activity (GO:0003824);; molecular function: binding (GO:0005488);; cellular component: membrane (GO:0016020);; cellular component: membrane part (GO:0044425)
PaF106G0800032368.01	PaF106G0800032368.01	0.630933	91	0.655738	89	0.739583	116	0.213421	34	0.235438	31	0.18288	28	2.47903e-07	1.46551	up	up	up	up	3.30725e-08	up	2.47903e-07	1.46551	up	--	--	Biological Process: signal transduction (GO:0007165);; Cellular Component: integral component of membrane (GO:0016021);; Molecular Function: ADP binding (GO:0043531);;	K00695|2.4e-111|mtr:MTR_6g478030|K00695 sucrose synthase [EC:2.4.1.13] | (RefSeq) sucrose synthase	Starch and sucrose metabolism (ko00500)	--	--	TIR domain	Disease resistance protein Roq1 OS=Nicotiana benthamiana OX=4100 GN=ROQ1 PE=1 SV=1	S	Function unknown	TMV resistance protein N [Prunus persica]	biological process: cellular process (GO:0009987);; biological process: biological regulation (GO:0065007);; cellular component: membrane (GO:0016020);; cellular component: membrane part (GO:0044425);; molecular function: binding (GO:0005488)
PaF106G0200007810.01	PaF106G0200007810.01	1.72114	120	2.31173	157	2.0429	161	0.57857	46	0.744917	47	0.57919	44	1.9964e-09	1.53425	up	up	up	up	1.92812e-10	up	1.9964e-09	1.53425	up	[QV]	Secondary metabolites biosynthesis, transport and catabolism;; Defense mechanisms	Molecular Function: monooxygenase activity (GO:0004497);; Molecular Function: iron ion binding (GO:0005506);; Cellular Component: integral component of membrane (GO:0016021);; Molecular Function: oxidoreductase activity, acting on paired donors, with incorporation or reduction of molecular oxygen (GO:0016705);; Molecular Function: heme binding (GO:0020037);;	K23806|2.7e-92|vvi:100246293|K23806 alpha-guaiene 2-oxidase | (RefSeq) premnaspirodiene oxygenase-like	--	[Q]	Secondary metabolites biosynthesis, transport and catabolism	Cytochrome P450	Premnaspirodiene oxygenase OS=Hyoscyamus muticus OX=35626 GN=CYP71D55 PE=1 SV=1	Q	Secondary metabolites biosynthesis, transport and catabolism	premnaspirodiene oxygenase-like [Prunus dulcis]	biological process: metabolic process (GO:0008152);; biological process: single-organism process (GO:0044699);; molecular function: catalytic activity (GO:0003824);; molecular function: binding (GO:0005488);; cellular component: membrane (GO:0016020);; cellular component: membrane part (GO:0044425)
PaF106G0500021223.01	PaF106G0500021223.01	0.11953	7	0.100259	6	0.163315	11	3.08486	194	2.07375	109	1.32859	81	5.25348e-17	-2.77724	down	down	down	down	2.41919e-18	down	5.25348e-17	-2.77724	down	--	--	Molecular Function: DNA binding (GO:0003677);; Cellular Component: nucleus (GO:0005634);;	K14292|1.1e-21|cann:107850838|K14292 trimethylguanosine synthase [EC:2.1.1.-] | (RefSeq) uncharacterized LOC107850838	RNA transport (ko03013)	--	--	Homeodomain	WUSCHEL-related homeobox 1 OS=Arabidopsis thaliana OX=3702 GN=WOX1 PE=2 SV=2	K	Transcription	unnamed protein product [Prunus armeniaca]	molecular function: binding (GO:0005488);; cellular component: cell (GO:0005623);; cellular component: organelle (GO:0043226);; cellular component: cell part (GO:0044464)
PaF106G0500018593.01	PaF106G0500018593.01	7.96659	457	8.74862	468	8.56463	525	2.27138	158	2.58171	141	2.5163	152	2.37712e-29	1.69616	up	up	up	up	5.13039e-31	up	2.37712e-29	1.69616	up	--	--	Cellular Component: integral component of membrane (GO:0016021);; Molecular Function: kinase activity (GO:0016301);;	--	--	--	--	--	--	--	--	protein DDB_G0276689-like isoform X1 [Prunus dulcis]	cellular component: membrane (GO:0016020);; cellular component: membrane part (GO:0044425);; molecular function: catalytic activity (GO:0003824)
PaF106G0100000244.01	PaF106G0100000244.01	4.88561	714	4.05282	552	5.59313	889	1.35537	217	3.09731	413	2.08288	322	8.59587e-07	1.109	up	up	up	up	1.2486e-07	up	8.59587e-07	1.109	up	[R]	General function prediction only	Biological Process: signal transduction (GO:0007165);; Molecular Function: ADP binding (GO:0043531);;	K00695|2.7e-163|mtr:MTR_6g478030|K00695 sucrose synthase [EC:2.4.1.13] | (RefSeq) sucrose synthase	Starch and sucrose metabolism (ko00500)	--	--	TIR domain	Disease resistance protein RPV1 OS=Vitis rotundifolia OX=103349 GN=RPV1 PE=1 SV=1	T	Signal transduction mechanisms	PREDICTED: TMV resistance protein N-like [Prunus mume]	biological process: cellular process (GO:0009987);; biological process: biological regulation (GO:0065007);; molecular function: binding (GO:0005488)
PaF106G0200007291.01	PaF106G0200007291.01	0.40636	104	0.130397	32	0.257413	72	0.800094	224	0.867162	201	0.629193	169	9.47261e-05	-1.17743	down	down	down	down	2.05612e-05	down	9.47261e-05	-1.17743	down	[R]	General function prediction only	Molecular Function: ADP binding (GO:0043531);;	K12818|8.0e-169|mtr:MTR_0267s0070|K12818 ATP-dependent RNA helicase DHX8/PRP22 [EC:3.6.4.13] | (RefSeq) NB-ARC domain disease resistance protein, putative	Spliceosome (ko03040)	[T]	Signal transduction mechanisms	NB-ARC domain	Putative disease resistance RPP13-like protein 1 OS=Arabidopsis thaliana OX=3702 GN=RPPL1 PE=3 SV=1	T	Signal transduction mechanisms	PREDICTED: LOW QUALITY PROTEIN: putative disease resistance RPP13-like protein 1 [Prunus mume]	molecular function: binding (GO:0005488)
PaF106G0800030354.01	PaF106G0800030354.01	7.92931	447	7.62902	401	8.12153	498	17.1189	1051	17.7368	910	18.8815	1123	9.75174e-21	-1.08276	down	down	down	down	3.57641e-22	down	9.75174e-21	-1.08276	down	--	--	Molecular Function: molecular_function (GO:0003674);; Molecular Function: nucleic acid binding (GO:0003676);; Molecular Function: RNA binding (GO:0003723);; Molecular Function: catalytic activity (GO:0003824);; Molecular Function: nuclease activity (GO:0004518);; Molecular Function: endonuclease activity (GO:0004519);; Molecular Function: binding (GO:0005488);; Cellular Component: cellular_compon…	--	--	[R]	General function prediction only	PPR repeat family	Pentatricopeptide repeat-containing protein At4g38150 OS=Arabidopsis thaliana OX=3702 GN=At4g38150 PE=2 SV=1	S	Function unknown	PREDICTED: pentatricopeptide repeat-containing protein At4g38150 [Prunus mume]	molecular function: binding (GO:0005488);; molecular function: catalytic activity (GO:0003824);; biological process: metabolic process (GO:0008152);; biological process: cellular process (GO:0009987);; cellular component: cell (GO:0005623);; cellular component: cell part (GO:0044464);; cellular component: organelle (GO:0043226)
PaF106G0400016382.01	PaF106G0400016382.01	0.328477	17	1.16432	55	0.72807	41	1.90463	107	1.75546	82	2.90642	157	0.000961549	-1.13535	down	down	down	down	0.000264136	down	0.000961549	-1.13535	down	--	--	Cellular Component: Golgi apparatus (GO:0005794);; Molecular Function: O-acetyltransferase activity (GO:0016413);;	K23877|9.5e-41|psom:113319599|K23877 xyloglucan O-acetyltransferase | (RefSeq) protein ALTERED XYLOGLUCAN 4-like isoform X1	--	--	--	GDSL/SGNH-like Acyl-Esterase family found in Pmr5 and Cas1p	Protein trichome birefringence-like 43 OS=Arabidopsis thaliana OX=3702 GN=TBL43 PE=2 SV=1	S	Function unknown	unnamed protein product [Prunus armeniaca]	cellular component: cell (GO:0005623);; cellular component: organelle (GO:0043226);; cellular component: cell part (GO:0044464);; molecular function: catalytic activity (GO:0003824)
PaF106G0800031608.01	PaF106G0800031608.01	12.5678	646	17.0397	817	14.0351	788	7.47248	393	5.92647	237	5.7109	278	4.78131e-16	1.34389	up	up	up	up	2.37416e-17	up	4.78131e-16	1.34389	up	--	--	Biological Process: response to auxin (GO:0009733);;	K14488|1.8e-47|pavi:110745503|K14488 SAUR family protein | (RefSeq) indole-3-acetic acid-induced protein ARG7-like	Plant hormone signal transduction (ko04075)	--	--	Auxin responsive protein	Indole-3-acetic acid-induced protein ARG7 OS=Vigna radiata var. radiata OX=3916 GN=ARG7 PE=2 SV=1	--	--	indole-3-acetic acid-induced protein ARG7 [Prunus persica]	biological process: response to stimulus (GO:0050896)
PaF106G0800031239.01	PaF106G0800031239.01	2.08291	125	1.60654	90	1.83415	119	0.427457	28	0.862884	47	0.663377	42	1.26139e-05	1.29972	up	up	up	up	2.28836e-06	up	1.26139e-05	1.29972	up	[Q]	Secondary metabolites biosynthesis, transport and catabolism	Molecular Function: metal ion binding (GO:0046872);; Molecular Function: dioxygenase activity (GO:0051213);;	K24028|6.2e-53|pda:103712793|K24028 salicylic acid 3-hydroxylase [EC:1.14.11.-] | (RefSeq) flavanone 3-dioxygenase 2-like	--	[QR]	Secondary metabolites biosynthesis, transport and catabolism;; General function prediction only	non-haem dioxygenase in morphine synthesis N-terminal	Probable 2-oxoglutarate-dependent dioxygenase At5g05600 OS=Arabidopsis thaliana OX=3702 GN=At5g05600 PE=2 SV=1	Q	Secondary metabolites biosynthesis, transport and catabolism	unnamed protein product [Prunus armeniaca]	molecular function: binding (GO:0005488);; biological process: metabolic process (GO:0008152);; biological process: single-organism process (GO:0044699);; molecular function: catalytic activity (GO:0003824)
PaF106G0200010558.01	PaF106G0200010558.01	2.02098	158	1.88415	137	1.58135	134	16.1855	1371	13.9577	988	11.4408	940	8.02236e-65	-2.70062	down	down	down	down	4.87606e-67	down	8.02236e-65	-2.70062	down	[G]	Carbohydrate transport and metabolism	Molecular Function: polygalacturonase activity (GO:0004650);; Cellular Component: extracellular region (GO:0005576);; Biological Process: carbohydrate metabolic process (GO:0005975);; Molecular Function: lyase activity (GO:0016829);; Biological Process: cell wall organization (GO:0071555);;	K01184|4.6e-28|csat:104772314|K01184 polygalacturonase [EC:3.2.1.15] | (RefSeq) probable polygalacturonase At3g15720	Pentose and glucuronate interconversions (ko00040)	--	--	Glycosyl hydrolases family 28	Probable polygalacturonase OS=Vitis vinifera OX=29760 GN=GSVIVT00026920001 PE=1 SV=1	G	Carbohydrate transport and metabolism	unnamed protein product [Prunus armeniaca]	molecular function: catalytic activity (GO:0003824);; cellular component: extracellular region (GO:0005576);; biological process: metabolic process (GO:0008152);; biological process: cellular process (GO:0009987);; biological process: cellular component organization or biogenesis (GO:0071840)
PaF106G0300013589.01	PaF106G0300013589.01	0.198241	20	0.185173	18	0.353074	39	2.16443	235	2.17358	197	1.46656	154	2.30498e-18	-2.39525	down	down	down	down	9.7238e-20	down	2.30498e-18	-2.39525	down	--	--	Molecular Function: zinc ion binding (GO:0008270);; Biological Process: RNA modification (GO:0009451);; Cellular Component: intracellular membrane-bounded organelle (GO:0043231);;	K22651|2.2e-123|mdm:103443441|K22651 E3 ubiquitin-protein ligase RNF4 [EC:2.3.2.27] | (RefSeq) LOW QUALITY PROTEIN: pentatricopeptide repeat-containing protein At1g50270-like	--	[R]	General function prediction only	PPR repeat family	Putative pentatricopeptide repeat-containing protein At3g15930 OS=Arabidopsis thaliana OX=3702 GN=PCMP-E51 PE=3 SV=2	S	Function unknown	PREDICTED: LOW QUALITY PROTEIN: putative pentatricopeptide repeat-containing protein At3g15930 [Prunus mume]	molecular function: binding (GO:0005488);; biological process: metabolic process (GO:0008152);; biological process: cellular process (GO:0009987);; cellular component: cell (GO:0005623);; cellular component: organelle (GO:0043226);; cellular component: cell part (GO:0044464)
PaF106G0800031807.01	PaF106G0800031807.01	1.25154	61	0.956908	43	1.50454	79	4.72515	248	4.15612	182	4.2138	214	1.29874e-11	-1.55719	down	down	down	down	9.63984e-13	down	1.29874e-11	-1.55719	down	[Q]	Secondary metabolites biosynthesis, transport and catabolism	Molecular Function: oxidoreductase activity (GO:0016491);; Molecular Function: metal ion binding (GO:0046872);;	K24028|4.5e-91|lja:Lj0g3v0213339.1|K24028 salicylic acid 3-hydroxylase [EC:1.14.11.-] | (RefSeq) Lj0g3v0213339.1; -	--	[QR]	Secondary metabolites biosynthesis, transport and catabolism;; General function prediction only	non-haem dioxygenase in morphine synthesis N-terminal	2-oxoglutarate-dependent dioxygenase 19 OS=Oryza sativa subsp. japonica OX=39947 GN=2ODD19 PE=1 SV=1	Q	Secondary metabolites biosynthesis, transport and catabolism	hypothetical protein Pyn_24989 [Prunus yedoensis var. nudiflora]	molecular function: catalytic activity (GO:0003824);; molecular function: binding (GO:0005488)
PaF106G0400016336.01	PaF106G0400016336.01	0	0	0	0	0	0	4.85246	372	3.85476	279	3.47135	299	8.96007e-68	-5.43109	down	down	down	down	5.07679e-70	down	8.96007e-68	-5.43109	down	--	--	--	--	--	--	--	--	--	--	--	unnamed protein product [Prunus armeniaca]	--
PaF106G0200009483.01	PaF106G0200009483.01	0.257876	17	0.327533	20	0.255827	18	1.62379	111	1.1273	65	0.844579	56	1.31712e-05	-1.46984	down	down	down	down	2.39692e-06	down	1.31712e-05	-1.46984	down	--	--	Molecular Function: protein kinase activity (GO:0004672);; Molecular Function: ATP binding (GO:0005524);; Cellular Component: cellular_component (GO:0005575);; Biological Process: response to stress (GO:0006950);; Biological Process: defense response (GO:0006952);; Biological Process: biological_process (GO:0008150);; Biological Process: response to external stimulus (GO:0009605);; Biological Pro…	--	--	[T]	Signal transduction mechanisms	--	--	T	Signal transduction mechanisms	unnamed protein product [Prunus armeniaca]	biological process: metabolic process (GO:0008152);; biological process: cellular process (GO:0009987);; molecular function: catalytic activity (GO:0003824);; molecular function: binding (GO:0005488);; biological process: response to stimulus (GO:0050896);; biological process: multi-organism process (GO:0051704);; cellular component: membrane (GO:0016020)
PaF106G0600022803.01	PaF106G0600022803.01	1.37449	96	1.76664	115	1.21347	93	4.42914	337	3.44628	219	4.18754	309	2.55221e-09	-1.27833	down	down	down	down	2.49253e-10	down	2.55221e-09	-1.27833	down	--	--	Cellular Component: integral component of membrane (GO:0016021);;	K13946|1.8e-12|ppp:112289353|K13946 auxin influx carrier (AUX1 LAX family) | (RefSeq) auxin transporter protein 1-like	Plant hormone signal transduction (ko04075)	[E]	Amino acid transport and metabolism	Transmembrane amino acid transporter protein	GABA transporter 1 OS=Arabidopsis thaliana OX=3702 GN=GAT1 PE=1 SV=1	E	Amino acid transport and metabolism	unnamed protein product [Prunus armeniaca]	cellular component: membrane (GO:0016020);; cellular component: membrane part (GO:0044425)
PaF106G0500019181.01	PaF106G0500019181.01	21.5561	1495	23.9923	1552	18.9623	1430	4.83924	366	6.35147	401	5.82336	427	6.38995e-44	1.92418	up	up	up	up	7.73482e-46	up	6.38995e-44	1.92418	up	--	--	Molecular Function: transcription corepressor activity (GO:0003714);; Biological Process: negative regulation of transcription, DNA-templated (GO:0045892);; Molecular Function: metal ion binding (GO:0046872);;	--	--	--	--	--	Increased DNA methylation 1 OS=Arabidopsis thaliana OX=3702 GN=IDM1 PE=1 SV=1	S	Function unknown	hypothetical protein PRUPE_5G059900 [Prunus persica]	biological process: biological regulation (GO:0065007);; molecular function: transcription factor activity, protein binding (GO:0000988);; molecular function: binding (GO:0005488)
PaF106G0200007383.01	PaF106G0200007383.01	2.84992	529	3.15167	545	3.14549	634	0.778848	158	0.922828	156	0.802919	158	9.5236e-37	1.85877	up	up	up	up	1.49619e-38	up	9.5236e-37	1.85877	up	[R]	General function prediction only	Molecular Function: ADP binding (GO:0043531);;	K12818|1.8e-198|mtr:MTR_0267s0070|K12818 ATP-dependent RNA helicase DHX8/PRP22 [EC:3.6.4.13] | (RefSeq) NB-ARC domain disease resistance protein, putative	Spliceosome (ko03040)	[T]	Signal transduction mechanisms	NB-ARC domain	Putative disease resistance RPP13-like protein 1 OS=Arabidopsis thaliana OX=3702 GN=RPPL1 PE=3 SV=1	T	Signal transduction mechanisms	PREDICTED: LOW QUALITY PROTEIN: putative disease resistance RPP13-like protein 1 [Prunus mume]	molecular function: binding (GO:0005488)
PaF106G0600021860.01	PaF106G0600021860.01	0.370904	11	0.426945	12	0.674314	22	2.16321	68	2.75134	72	3.40458	104	1.59348e-07	-1.75714	down	down	down	down	2.04623e-08	down	1.59348e-07	-1.75714	down	--	--	Biological Process: lipid transport (GO:0006869);; Molecular Function: lipid binding (GO:0008289);; Cellular Component: integral component of membrane (GO:0016021);;	--	--	--	--	--	--	T	Signal transduction mechanisms	lipid transfer protein 1 [Prunus dulcis]	biological process: single-organism process (GO:0044699);; biological process: localization (GO:0051179);; molecular function: binding (GO:0005488);; cellular component: membrane (GO:0016020);; cellular component: membrane part (GO:0044425)
PaF106G0100001853.01	PaF106G0100001853.01	0.37847	74	0.388869	69	0.374577	80	1.62491	311	1.97378	310	2.0663	373	1.35116e-22	-1.91743	down	down	down	down	4.46117e-24	down	1.35116e-22	-1.91743	down	[R]	General function prediction only	Biological Process: defense response (GO:0006952);; Molecular Function: ADP binding (GO:0043531);;	K15078|2.4e-101|vvi:100255136|K15078 structure-specific endonuclease subunit SLX1 [EC:3.6.1.-] | (RefSeq) putative disease resistance protein RGA1	--	[T]	Signal transduction mechanisms	NB-ARC domain	Putative disease resistance protein RGA3 OS=Solanum bulbocastanum OX=147425 GN=RGA3 PE=2 SV=2	T	Signal transduction mechanisms	unnamed protein product [Prunus armeniaca]	biological process: response to stimulus (GO:0050896);; molecular function: binding (GO:0005488)
Prunus_sibirica_newGene_893	--	0.254936	25	0.289225	27	0.346445	37	2.46772	257	2.2281	195	2.46673	251	1.17661e-27	-2.56067	down	down	down	down	2.81819e-29	down	1.17661e-27	-2.56067	down	--	--	Molecular Function: ATP binding (GO:0005524);;	--	--	--	--	PPR repeat family	--	--	--	ATP-binding protein [Prunus dulcis]	molecular function: binding (GO:0005488)
PaF106G0300012867.01	PaF106G0300012867.01	1.3466	111	1.70698	131	1.00398	90	0	0	0.053435	4	0.022134	2	6.97888e-25	3.53673	up	up	up	up	1.99509e-26	up	6.97888e-25	3.53673	up	--		Molecular Function: protein kinase activity (GO:0004672);; Molecular Function: ATP binding (GO:0005524);; Molecular Function: polysaccharide binding (GO:0030247);;	K13415|5.8e-33|mus:103980973|K13415 protein brassinosteroid insensitive 1 [EC:2.7.10.1 2.7.11.1] | (RefSeq) systemin receptor SR160-like	Plant hormone signal transduction (ko04075)	[T]	Signal transduction mechanisms	Protein kinase domain	LEAF RUST 10 DISEASE-RESISTANCE LOCUS RECEPTOR-LIKE PROTEIN KINASE-like 2.1 OS=Arabidopsis thaliana OX=3702 GN=LRK10L-2.1 PE=3 SV=1	T	Signal transduction mechanisms	LEAF RUST 10 DISEASE-RESISTANCE LOCUS RECEPTOR-LIKE PROTEIN KINASE-like 2.1 [Prunus avium]	biological process: metabolic process (GO:0008152);; biological process: cellular process (GO:0009987);; molecular function: catalytic activity (GO:0003824);; molecular function: binding (GO:0005488)
PaF106G0700027011.01	PaF106G0700027011.01	0.468837	25	0.269301	14	0.254678	15	2.99657	171	2.74555	131	2.56079	141	4.45011e-17	-2.40128	down	down	down	down	2.04008e-18	down	4.45011e-17	-2.40128	down	[G]	Carbohydrate transport and metabolism	Biological Process: biosynthetic process (GO:0009058);; Cellular Component: integral component of membrane (GO:0016021);; Molecular Function: strictosidine synthase activity (GO:0016844);;	--	--	[R]	General function prediction only	Strictosidine synthase	Protein STRICTOSIDINE SYNTHASE-LIKE 5 OS=Arabidopsis thaliana OX=3702 GN=SSL5 PE=2 SV=1	J	Translation, ribosomal structure and biogenesis	protein STRICTOSIDINE SYNTHASE-LIKE 5-like [Prunus dulcis]	biological process: metabolic process (GO:0008152);; cellular component: membrane (GO:0016020);; cellular component: membrane part (GO:0044425);; molecular function: catalytic activity (GO:0003824)
PaF106G0100005871.01	PaF106G0100005871.01	1.73981	131	1.98387	142	2.13891	178	5.6142	465	6.13459	425	5.43974	435	2.62313e-18	-1.40302	down	down	down	down	1.11335e-19	down	2.62313e-18	-1.40302	down	--	--	Molecular Function: protein binding (GO:0005515);;	K20890|1.8e-33|pmum:103336416|K20890 xylan alpha-glucuronosyltransferase [EC:2.4.1.-] | (RefSeq) LOW QUALITY PROTEIN: putative UDP-glucuronate:xylan alpha-glucuronosyltransferase 3	--	[O]	Posttranslational modification, protein turnover, chaperones	F-box-like	Calreticulin-3 OS=Arabidopsis thaliana OX=3702 GN=CRT3 PE=1 SV=2	--	--	uncharacterized protein LOC117616355 isoform X1 [Prunus dulcis]	molecular function: binding (GO:0005488)
PaF106G0600021580.01	PaF106G0600021580.01	1.27748	97	1.23266	87	1.4577	120	10.9598	901	10.1485	697	9.07614	723	3.88849e-73	-2.71997	down	down	down	down	2.00293e-75	down	3.88849e-73	-2.71997	down	[G]	Carbohydrate transport and metabolism	Biological Process: carbohydrate metabolic process (GO:0005975);; Molecular Function: beta-glucosidase activity (GO:0008422);; Biological Process: response to salt stress (GO:0009651);; Biological Process: glucosinolate catabolic process (GO:0019762);;	K01188|5.1e-80|pper:18774589|K01188 beta-glucosidase [EC:3.2.1.21] | (RefSeq) beta-glucosidase 13	Cyanoamino acid metabolism (ko00460);; Starch and sucrose metabolism (ko00500);; Phenylpropanoid biosynthesis (ko00940)	[G]	Carbohydrate transport and metabolism	Glycosyl hydrolase family 1	Non-cyanogenic beta-glucosidase OS=Trifolium repens OX=3899 PE=1 SV=1	G	Carbohydrate transport and metabolism	hypothetical protein PRUPE_6G018800 [Prunus persica]	biological process: metabolic process (GO:0008152);; molecular function: catalytic activity (GO:0003824);; biological process: response to stimulus (GO:0050896);; biological process: cellular process (GO:0009987);; biological process: single-organism process (GO:0044699)
PaF106G0200007131.01	PaF106G0200007131.01	1.2515	160	1.08369	134	1.63262	233	3.09986	444	3.88943	467	3.83787	525	1.73444e-12	-1.29515	down	down	down	down	1.16409e-13	down	1.73444e-12	-1.29515	down	--	--	Molecular Function: molecular_function (GO:0003674);; Molecular Function: nucleic acid binding (GO:0003676);; Molecular Function: RNA binding (GO:0003723);; Molecular Function: catalytic activity (GO:0003824);; Molecular Function: nuclease activity (GO:0004518);; Molecular Function: endonuclease activity (GO:0004519);; Molecular Function: binding (GO:0005488);; Cellular Component: cellular_compon…	K20291|8.6e-09|gab:108479373|K20291 conserved oligomeric Golgi complex subunit 4 | (RefSeq) pentatricopeptide repeat-containing protein At4g01400, mitochondrial-like	--	[R]	General function prediction only	PPR repeat family	Pentatricopeptide repeat-containing protein At4g20740 OS=Arabidopsis thaliana OX=3702 GN=At4g20740 PE=3 SV=1	S	Function unknown	unnamed protein product [Prunus armeniaca]	molecular function: binding (GO:0005488);; molecular function: catalytic activity (GO:0003824);; biological process: metabolic process (GO:0008152);; biological process: cellular process (GO:0009987);; cellular component: cell (GO:0005623);; cellular component: cell part (GO:0044464);; cellular component: organelle (GO:0043226)
PaF106G0600023832.01	PaF106G0600023832.01	0.759792	79	0.529063	51	0.912988	103	2.00453	225	2.1531	202	2.04269	222	5.37124e-08	-1.26498	down	down	down	down	6.37721e-09	down	5.37124e-08	-1.26498	down	--	--	Molecular Function: molecular_function (GO:0003674);; Molecular Function: nucleic acid binding (GO:0003676);; Molecular Function: RNA binding (GO:0003723);; Molecular Function: catalytic activity (GO:0003824);; Molecular Function: nuclease activity (GO:0004518);; Molecular Function: endonuclease activity (GO:0004519);; Molecular Function: binding (GO:0005488);; Cellular Component: cellular_compon…	K22262|1.4e-81|qsu:112034235|K22262 WD repeat and FYVE domain-containing protein 3 | (RefSeq) protein SPIRRIG	--	[R]	General function prediction only	PPR repeat	Pentatricopeptide repeat-containing protein At4g39952, mitochondrial OS=Arabidopsis thaliana OX=3702 GN=PCMP-E98 PE=2 SV=2	S	Function unknown	unnamed protein product [Prunus armeniaca]	molecular function: binding (GO:0005488);; molecular function: catalytic activity (GO:0003824);; biological process: metabolic process (GO:0008152);; biological process: cellular process (GO:0009987);; cellular component: cell (GO:0005623);; cellular component: cell part (GO:0044464);; cellular component: organelle (GO:0043226)
PaF106G0100002813.01	PaF106G0100002813.01	1.82253	126	1.52667	98	1.38348	104	0.358325	27	0.222891	14	0.152809	12	4.52487e-12	2.14256	up	up	up	up	3.15347e-13	up	4.52487e-12	2.14256	up	[QV]	Secondary metabolites biosynthesis, transport and catabolism;; Defense mechanisms	Molecular Function: monooxygenase activity (GO:0004497);; Molecular Function: iron ion binding (GO:0005506);; Cellular Component: integral component of membrane (GO:0016021);; Molecular Function: oxidoreductase activity, acting on paired donors, with incorporation or reduction of molecular oxygen (GO:0016705);; Molecular Function: heme binding (GO:0020037);;	K23810|7.5e-172|vvi:100232891|K23810 (E)-8-carboxylinalool synthase [EC:1.14.14.-] | (RefSeq) GFH2; ripening-related P-450 enzyme-like	Monoterpenoid biosynthesis (ko00902)	[Q]	Secondary metabolites biosynthesis, transport and catabolism	Cytochrome P450	Geraniol 8-hydroxylase OS=Catharanthus roseus OX=4058 GN=CYP76B6 PE=1 SV=1	Q	Secondary metabolites biosynthesis, transport and catabolism	unnamed protein product [Prunus armeniaca]	biological process: metabolic process (GO:0008152);; biological process: single-organism process (GO:0044699);; molecular function: catalytic activity (GO:0003824);; molecular function: binding (GO:0005488);; cellular component: membrane (GO:0016020);; cellular component: membrane part (GO:0044425)
PaF106G0800029287.01	PaF106G0800029287.01	4.94458	702	5.27629	699	4.25934	658	10.8465	1676	11.5209	1488	10.3747	1555	4.25042e-20	-1.07365	down	down	down	down	1.61575e-21	down	4.25042e-20	-1.07365	down	--	--	Molecular Function: molecular_function (GO:0003674);; Molecular Function: nucleic acid binding (GO:0003676);; Molecular Function: RNA binding (GO:0003723);; Molecular Function: catalytic activity (GO:0003824);; Molecular Function: nuclease activity (GO:0004518);; Molecular Function: endonuclease activity (GO:0004519);; Molecular Function: binding (GO:0005488);; Cellular Component: cellular_compon…	--	--	[R]	General function prediction only	PPR repeat family	Pentatricopeptide repeat-containing protein At5g14820, mitochondrial OS=Arabidopsis thaliana OX=3702 GN=At5g14820 PE=2 SV=1	L	Replication, recombination and repair	unnamed protein product [Prunus armeniaca]	molecular function: binding (GO:0005488);; molecular function: catalytic activity (GO:0003824);; biological process: metabolic process (GO:0008152);; biological process: cellular process (GO:0009987);; cellular component: cell (GO:0005623);; cellular component: cell part (GO:0044464);; cellular component: organelle (GO:0043226)
PaF106G0100000431.01	PaF106G0100000431.01	1.01407	138	0.695249	88	1.26062	186	2.51932	371	4.05273	499	3.01968	432	1.04003e-10	-1.45524	down	down	down	down	8.53925e-12	down	1.04003e-10	-1.45524	down	[KL]	Transcription;; Replication, recombination and repair	Molecular Function: nucleic acid binding (GO:0003676);; Molecular Function: ATP binding (GO:0005524);; Molecular Function: zinc ion binding (GO:0008270);; Molecular Function: hydrolase activity, acting on acid anhydrides, in phosphorus-containing anhydrides (GO:0016818);;	K15505|0.0e+00|pmum:103324215|K15505 DNA repair protein RAD5 [EC:3.6.4.-] | (RefSeq) putative SWI/SNF-related matrix-associated actin-dependent regulator of chromatin subfamily A member 3-like 3	--	[KL]	Transcription;; Replication, recombination and repair	SNF2 family N-terminal domain	DNA repair protein RAD5B OS=Arabidopsis thaliana OX=3702 GN=RAD5B PE=3 SV=1	--	--	unnamed protein product [Prunus armeniaca]	molecular function: binding (GO:0005488);; molecular function: catalytic activity (GO:0003824)
PaF106G0600024841.01	PaF106G0600024841.01	12.5695	1135	11.7248	988	11.6466	1144	4.57845	450	5.32982	438	5.56361	531	2.89483e-23	1.25154	up	up	up	up	9.14048e-25	up	2.89483e-23	1.25154	up	[O]	Posttranslational modification, protein turnover, chaperones	Biological Process: reproduction (GO:0000003);; Biological Process: cell morphogenesis (GO:0000902);; Biological Process: cell morphogenesis involved in differentiation (GO:0000904);; Biological Process: developmental process involved in reproduction (GO:0003006);; Molecular Function: molecular_function (GO:0003674);; Molecular Function: catalytic activity (GO:0003824);; Cellular Component: cellu…	K03686|2.3e-16|ini:109164591|K03686 molecular chaperone DnaJ | (RefSeq) chaperone protein DnaJ	--	[O]	Posttranslational modification, protein turnover, chaperones	DnaJ domain	DnaJ protein ERDJ3A OS=Arabidopsis thaliana OX=3702 GN=ERDJ3A PE=1 SV=1	O	Posttranslational modification, protein turnover, chaperones	unnamed protein product [Prunus armeniaca]	biological process: reproduction (GO:0000003);; biological process: cellular process (GO:0009987);; biological process: developmental process (GO:0032502);; biological process: single-organism process (GO:0044699);; biological process: cellular component organization or biogenesis (GO:0071840);; biological process: reproductive process (GO:0022414);; molecular function: catalytic activity (GO:000…
PaF106G0800031596.01	PaF106G0800031596.01	9.59725	234	12.5551	285	11.0822	293	3.57314	95	3.26743	73	2.6646	69	8.29285e-17	1.71642	up	up	up	up	3.91704e-18	up	8.29285e-17	1.71642	up	--	--	Biological Process: response to auxin (GO:0009733);;	K14488|2.1e-69|pmum:103335786|K14488 SAUR family protein | (RefSeq) indole-3-acetic acid-induced protein ARG7-like	Plant hormone signal transduction (ko04075)	--	--	Auxin responsive protein	Indole-3-acetic acid-induced protein ARG7 OS=Vigna radiata var. radiata OX=3916 GN=ARG7 PE=2 SV=1	S	Function unknown	PREDICTED: indole-3-acetic acid-induced protein ARG7-like [Prunus mume]	biological process: response to stimulus (GO:0050896)
PaF106G0300012363.01	PaF106G0300012363.01	0.191762	13	0.444724	28	0.276415	21	1.09817	81	0.851622	53	0.638214	46	0.00473324	-1.02539	down	down	down	down	0.0015567	down	0.00473324	-1.02539	down	[P]	Inorganic ion transport and metabolism	Molecular Function: zinc ion transmembrane transporter activity (GO:0005385);; Cellular Component: plasma membrane (GO:0005886);; Cellular Component: membrane (GO:0016020);; Cellular Component: integral component of membrane (GO:0016021);; Biological Process: zinc II ion transmembrane transport (GO:0071577);;	K14709|1.6e-189|pmum:103328994|K14709 solute carrier family 39 (zinc transporter), member 1/2/3 | (RefSeq) zinc transporter 8-like	--	[P]	Inorganic ion transport and metabolism	ZIP Zinc transporter	Zinc transporter 8 OS=Oryza sativa subsp. japonica OX=39947 GN=ZIP8 PE=2 SV=1	P	Inorganic ion transport and metabolism	unnamed protein product [Prunus armeniaca]	biological process: localization (GO:0051179);; molecular function: transporter activity (GO:0005215);; cellular component: cell (GO:0005623);; cellular component: membrane (GO:0016020);; cellular component: cell part (GO:0044464);; cellular component: membrane part (GO:0044425)
Prunus_sibirica_newGene_462	--	2.72189	288	2.37347	235	2.15548	248	0.996859	115	0.690514	67	0.678822	76	5.30092e-12	1.5279	up	up	up	up	3.71889e-13	up	5.30092e-12	1.5279	up	--	--	--	K03549|1.7e-89|qsu:111987200|K03549 KUP system potassium uptake protein | (RefSeq) LOW QUALITY PROTEIN: probable potassium transporter 17	--	[R]	General function prediction only	Reverse transcriptase (RNA-dependent DNA polymerase)	Retrovirus-related Pol polyprotein from transposon RE1 OS=Arabidopsis thaliana OX=3702 GN=RE1 PE=2 SV=1	L	Replication, recombination and repair	RmlC-like cupins superfamily protein [Prunus dulcis]	--
PaF106G0100003324.01	PaF106G0100003324.01	12.2812	613	17.4515	812	19.8583	1078	8.84593	481	5.52522	251	5.66201	299	5.69742e-11	1.27753	up	up	up	up	4.53704e-12	up	5.69742e-11	1.27753	up	--	--	Molecular Function: DNA binding (GO:0003677);; Cellular Component: nucleus (GO:0005634);; Biological Process: regulation of transcription, DNA-templated (GO:0006355);;	K00521|2.6e-41|cmos:111447866|K00521 ferric-chelate reductase [EC:1.16.1.7] | (RefSeq) ferric reduction oxidase 7, chloroplastic-like	--	--	--	No apical meristem (NAM) protein	NAC domain-containing protein 2 OS=Solanum lycopersicum OX=4081 GN=NAP2 PE=2 SV=1	K	Transcription	PREDICTED: NAC transcription factor 29 [Prunus mume]	molecular function: binding (GO:0005488);; cellular component: cell (GO:0005623);; cellular component: organelle (GO:0043226);; cellular component: cell part (GO:0044464);; biological process: biological regulation (GO:0065007)
PaF106G0300011959.01	PaF106G0300011959.01	5.22701	444	5.69775	448	6.01964	559	30.0124	2787	33.8653	2627	32.6206	2923	1.15296e-133	-2.39745	down	down	down	down	2.07858e-136	down	1.15296e-133	-2.39745	down	--	--	Molecular Function: magnesium ion binding (GO:0000287);; Molecular Function: terpene synthase activity (GO:0010333);;	K18108|1.5e-139|vvi:100855144|K18108 (-)-alpha-terpineol synthase [EC:4.2.3.111] | (RefSeq) (-)-alpha-terpineol synthase	Monoterpenoid biosynthesis (ko00902)	--	--	Terpene synthase family, metal binding domain	Probable terpene synthase 9 OS=Ricinus communis OX=3988 GN=TPS9 PE=3 SV=1	S	Function unknown	PREDICTED: probable terpene synthase 9 [Prunus mume]	molecular function: binding (GO:0005488);; molecular function: catalytic activity (GO:0003824)
PaF106G0400016726.01	PaF106G0400016726.01	0.324166	42	0.248712	31	0.257206	37	0.879124	124	0.681991	81	0.964976	132	1.19181e-05	-1.26521	down	down	down	down	2.15414e-06	down	1.19181e-05	-1.26521	down	--	--	Cellular Component: integral component of membrane (GO:0016021);;	K13466|2.5e-75|cit:102616085|K13466 EIX receptor 1/2 | (RefSeq) receptor-like protein EIX1	Plant-pathogen interaction (ko04626)	[R]	General function prediction only	Leucine rich repeat	Receptor-like protein EIX2 OS=Solanum lycopersicum OX=4081 GN=EIX2 PE=1 SV=2	S	Function unknown	PREDICTED: receptor-like protein 12 [Prunus mume]	cellular component: membrane (GO:0016020);; cellular component: membrane part (GO:0044425)
PaF106G0800032454.01	PaF106G0800032454.01	0.078609	8	0.103262	9	0.090474	9	0.718534	71	0.81941	68	0.449696	43	2.43821e-07	-1.84069	down	down	down	down	3.24777e-08	down	2.43821e-07	-1.84069	down	[R]	General function prediction only	Biological Process: signal transduction (GO:0007165);; Molecular Function: ADP binding (GO:0043531);;	K00695|8.0e-89|mtr:MTR_6g478030|K00695 sucrose synthase [EC:2.4.1.13] | (RefSeq) sucrose synthase	Starch and sucrose metabolism (ko00500)	--	--	NB-ARC domain	Disease resistance protein Roq1 OS=Nicotiana benthamiana OX=4100 GN=ROQ1 PE=1 SV=1	S	Function unknown	PREDICTED: TMV resistance protein N-like [Prunus mume]	biological process: cellular process (GO:0009987);; biological process: biological regulation (GO:0065007);; molecular function: binding (GO:0005488)
PaF106G0500020339.01	PaF106G0500020339.01	42.3988	2620	51.7527	3044	49.4572	3345	25.0243	1777	24.3437	1398	20.5746	1383	1.68475e-23	1.05209	up	up	up	up	5.20682e-25	up	1.68475e-23	1.05209	up	--	--	Molecular Function: mRNA binding (GO:0003729);; Molecular Function: metal ion binding (GO:0046872);;	K12198|6.2e-18|pavi:110771223|K12198 charged multivesicular body protein 5 | (RefSeq) vacuolar protein sorting-associated protein 60.1-like isoform X1	Endocytosis (ko04144)	[R]	General function prediction only	Zinc finger C-x8-C-x5-C-x3-H type (and similar)	Zinc finger CCCH domain-containing protein 8 OS=Oryza sativa subsp. japonica OX=39947 GN=Os01g0616400 PE=2 SV=2	S	Function unknown	unnamed protein product [Prunus armeniaca]	molecular function: binding (GO:0005488)
PaF106G0100005867.01	PaF106G0100005867.01	5.68265	475	6.35948	496	5.79328	526	0	0	0	0	0	0	3.25487e-97	6.20254	up	up	up	up	1.05623e-99	up	3.25487e-97	6.20254	up	--	--	Molecular Function: protein binding (GO:0005515);;	K20890|9.8e-24|pmum:103336416|K20890 xylan alpha-glucuronosyltransferase [EC:2.4.1.-] | (RefSeq) LOW QUALITY PROTEIN: putative UDP-glucuronate:xylan alpha-glucuronosyltransferase 3	--	[O]	Posttranslational modification, protein turnover, chaperones	F-box domain	Calreticulin-3 OS=Arabidopsis thaliana OX=3702 GN=CRT3 PE=1 SV=2	--	--	uncharacterized protein LOC110753452 [Prunus avium]	molecular function: binding (GO:0005488)
PaF106G0200010531.01	PaF106G0200010531.01	69.2284	5773	59.8804	4656	71.4571	6477	152.133	13806	127.155	9642	164.681	14488	3.5938e-21	-1.05099	down	down	down	down	1.29395e-22	down	3.5938e-21	-1.05099	down	--	--	Molecular Function: transferase activity, transferring acyl groups other than amino-acyl groups (GO:0016747);;	K19747|6.2e-252|pmum:103333179|K19747 BAHD acyltransferase [EC:2.3.1.-] | (RefSeq) BAHD acyltransferase DCR	--	--	--	Transferase family	BAHD acyltransferase DCR OS=Arabidopsis thaliana OX=3702 GN=DCR PE=2 SV=1	S	Function unknown	unnamed protein product [Prunus armeniaca]	molecular function: catalytic activity (GO:0003824)
PaF106G0400016330.01	PaF106G0400016330.01	1.67099	165	0.79863	74	1.07617	115	0.135909	15	0.136309	13	0.018505	2	2.18071e-12	2.45344	up	up	up	up	1.48046e-13	up	2.18071e-12	2.45344	up	--	--	Cellular Component: integral component of membrane (GO:0016021);;	K13466|5.4e-22|vvi:100246778|K13466 EIX receptor 1/2 | (RefSeq) receptor-like protein 12	Plant-pathogen interaction (ko04626)	--	--	Leucine rich repeat	Phytosulfokine receptor 1 OS=Arabidopsis thaliana OX=3702 GN=PSKR1 PE=1 SV=4	T	Signal transduction mechanisms	PREDICTED: receptor [Prunus dulcis]	cellular component: membrane (GO:0016020);; cellular component: membrane part (GO:0044425)
PaF106G0100001486.01	PaF106G0100001486.01	2.51961	151	3.86535	224	4.0906	270	1.39177	94	1.0991	61	1.1543	73	5.10555e-09	1.41123	up	up	up	up	5.22547e-10	up	5.10555e-09	1.41123	up	--	--	Molecular Function: protein serine/threonine phosphatase activity (GO:0004722);;	K17506|1.1e-26|ppp:112274707|K17506 protein phosphatase 1L [EC:3.1.3.16] | (RefSeq) probable protein phosphatase 2C 59 isoform X1	--	[T]	Signal transduction mechanisms	Protein phosphatase 2C	Probable protein phosphatase 2C 34 OS=Arabidopsis thaliana OX=3702 GN=At3g05640 PE=1 SV=1	T	Signal transduction mechanisms	unnamed protein product [Prunus armeniaca]	biological process: metabolic process (GO:0008152);; biological process: cellular process (GO:0009987);; molecular function: catalytic activity (GO:0003824)
PaF106G0200010730.01	PaF106G0200010730.01	8.45002	435	10.0014	481	12.9478	725	5.90843	332	4.94111	232	3.20327	174	5.42514e-08	1.1336	up	up	up	up	6.45053e-09	up	5.42514e-08	1.1336	up	--	--	Cellular Component: nucleus (GO:0005634);; Biological Process: regulation of transcription, DNA-templated (GO:0006355);; Molecular Function: sequence-specific DNA binding (GO:0043565);;	K09338|1.6e-115|pmum:103333586|K09338 homeobox-leucine zipper protein | (RefSeq) homeobox-leucine zipper protein ATHB-12-like	--	[K]	Transcription	Homeodomain	Homeobox-leucine zipper protein HOX6 OS=Oryza sativa subsp. indica OX=39946 GN=HOX6 PE=2 SV=2	K	Transcription	homeobox leucine zipper protein [Prunus armeniaca]	cellular component: cell (GO:0005623);; cellular component: organelle (GO:0043226);; cellular component: cell part (GO:0044464);; biological process: biological regulation (GO:0065007);; molecular function: binding (GO:0005488)
PaF106G0700027580.01	PaF106G0700027580.01	1.4407	131	1.2689	107	1.73185	170	4.21419	415	3.57383	294	4.43227	423	4.17518e-12	-1.29758	down	down	down	down	2.90046e-13	down	4.17518e-12	-1.29758	down	[IQ]	Lipid transport and metabolism;; Secondary metabolites biosynthesis, transport and catabolism	Molecular Function: ligase activity (GO:0016874);;	K01904|8.3e-191|pmum:103339831|K01904 4-coumarate--CoA ligase [EC:6.2.1.12] | (RefSeq) 4-coumarate--CoA ligase-like 7	Ubiquinone and other terpenoid-quinone biosynthesis (ko00130);; Phenylpropanoid biosynthesis (ko00940)	[I]	Lipid transport and metabolism	AMP-binding enzyme	4-coumarate--CoA ligase-like 7 OS=Arabidopsis thaliana OX=3702 GN=4CLL7 PE=1 SV=1	I	Lipid transport and metabolism	unnamed protein product [Prunus armeniaca]	molecular function: catalytic activity (GO:0003824)
PaF106G0800029503.01	PaF106G0800029503.01	4.51968	265	6.05664	328	7.12032	454	1.47798	96	1.00138	56	1.00832	63	7.63259e-23	2.14521	up	up	up	up	2.48863e-24	up	7.63259e-23	2.14521	up	[P]	Inorganic ion transport and metabolism	Molecular Function: oxidoreductase activity (GO:0016491);; Molecular Function: flavin adenine dinucleotide binding (GO:0050660);; Molecular Function: NADP binding (GO:0050661);;	K11816|2.1e-186|pmum:103333856|K11816 indole-3-pyruvate monooxygenase [EC:1.14.13.168] | (RefSeq) probable indole-3-pyruvate monooxygenase YUCCA10	Tryptophan metabolism (ko00380)	[Q]	Secondary metabolites biosynthesis, transport and catabolism	Pyridine nucleotide-disulphide oxidoreductase	Probable indole-3-pyruvate monooxygenase YUCCA10 OS=Arabidopsis thaliana OX=3702 GN=YUC10 PE=2 SV=1	Q	Secondary metabolites biosynthesis, transport and catabolism	hypothetical protein PRUPE_8G252500 [Prunus persica]	molecular function: catalytic activity (GO:0003824);; molecular function: binding (GO:0005488)
PaF106G0500019342.01	PaF106G0500019342.01	59.191	2123	63.6213	2128	62.5944	2441	186.009	7260	140.844	4594	185.821	7031	3.09091e-33	-1.36255	down	down	down	down	5.66789e-35	down	3.09091e-33	-1.36255	down	--	--	--	--	--	--	--	--	--	S	Function unknown	14 kDa proline-rich protein DC2.15 [Prunus persica]	--
PaF106G0800031809.01	PaF106G0800031809.01	1.07616	52	0.982705	45	1.76329	93	7.85826	411	7.12844	312	7.62452	387	2.61417e-26	-2.25143	down	down	down	down	6.88081e-28	down	2.61417e-26	-2.25143	down	[Q]	Secondary metabolites biosynthesis, transport and catabolism	Molecular Function: oxidoreductase activity (GO:0016491);; Molecular Function: metal ion binding (GO:0046872);;	K24028|1.3e-90|lja:Lj0g3v0213339.1|K24028 salicylic acid 3-hydroxylase [EC:1.14.11.-] | (RefSeq) Lj0g3v0213339.1; -	--	[QR]	Secondary metabolites biosynthesis, transport and catabolism;; General function prediction only	non-haem dioxygenase in morphine synthesis N-terminal	2-oxoglutarate-dependent dioxygenase 19 OS=Oryza sativa subsp. japonica OX=39947 GN=2ODD19 PE=1 SV=1	Q	Secondary metabolites biosynthesis, transport and catabolism	PREDICTED: protein DMR6-LIKE OXYGENASE 2-like [Prunus mume]	molecular function: catalytic activity (GO:0003824);; molecular function: binding (GO:0005488)
PaF106G0800032221.01	PaF106G0800032221.01	3.45156	290	3.38108	265	4.96815	453	0.44479	41	0.895586	69	0.639525	57	1.1825e-22	2.3341	up	up	up	up	3.88604e-24	up	1.1825e-22	2.3341	up	--	--	Cellular Component: plasma membrane (GO:0005886);; Cellular Component: integral component of membrane (GO:0016021);;	K08286|6.9e-07|aly:9305569|K08286 protein-serine/threonine kinase [EC:2.7.11.-] | (RefSeq) receptor-like protein kinase 5	--	--	--	Leucine rich repeat	Probable LRR receptor-like serine/threonine-protein kinase At2g24230 OS=Arabidopsis thaliana OX=3702 GN=At2g24230 PE=1 SV=1	T	Signal transduction mechanisms	PREDICTED: leucine-rich repeat receptor protein kinase EMS1-like [Prunus mume]	cellular component: cell (GO:0005623);; cellular component: membrane (GO:0016020);; cellular component: cell part (GO:0044464);; cellular component: membrane part (GO:0044425)
PaF106G0200008109.01	PaF106G0200008109.01	0	0	0	0	0	0	10.1425	1494	7.50072	923	6.63934	948	2.71666e-130	-6.96223	down	down	down	down	5.03759e-133	down	2.71666e-130	-6.96223	down	--	--	Biological Process: defense response (GO:0006952);; Molecular Function: ADP binding (GO:0043531);;	K13457|1.7e-47|pop:112325953|K13457 disease resistance protein RPM1 | (RefSeq) disease resistance protein RPM1-like	Plant-pathogen interaction (ko04626)	[T]	Signal transduction mechanisms	NB-ARC domain	Putative disease resistance protein At1g50180 OS=Arabidopsis thaliana OX=3702 GN=At1g50180 PE=3 SV=2	T	Signal transduction mechanisms	PREDICTED: LOW QUALITY PROTEIN: putative disease resistance protein At1g50180 [Prunus mume]	biological process: response to stimulus (GO:0050896);; molecular function: binding (GO:0005488)
PaF106G0200007275.01	PaF106G0200007275.01	1.16614	112	1.16862	104	1.82769	190	3.6162	376	3.74425	325	2.75641	278	2.45787e-07	-1.10312	down	down	down	down	3.27774e-08	down	2.45787e-07	-1.10312	down	--	--	Molecular Function: GTPase activity (GO:0003924);; Molecular Function: GTP binding (GO:0005525);; Cellular Component: cytoplasm (GO:0005737);; Molecular Function: microtubule binding (GO:0008017);; Cellular Component: membrane (GO:0016020);; Biological Process: organelle fission (GO:0048285);;	K17065|7.7e-42|ats:109745633|K17065 dynamin 1-like protein [EC:3.6.5.5] | (RefSeq) LOC109745633; dynamin-related protein 3A-like	--	[UR]	Intracellular trafficking, secretion, and vesicular transport;; General function prediction only	Dynamin central region	Dynamin-related protein 4C OS=Arabidopsis thaliana OX=3702 GN=DRP4C PE=2 SV=1	U	Intracellular trafficking, secretion, and vesicular transport	unnamed protein product [Prunus armeniaca]	molecular function: catalytic activity (GO:0003824);; molecular function: binding (GO:0005488);; cellular component: cell (GO:0005623);; cellular component: cell part (GO:0044464);; cellular component: membrane (GO:0016020);; biological process: cellular process (GO:0009987);; biological process: cellular component organization or biogenesis (GO:0071840)
PaF106G0800031588.01	PaF106G0800031588.01	9.87716	227	10.8872	234	11.4961	288	27.5009	688	24.5419	513	20.5603	499	9.45253e-12	-1.04682	down	down	down	down	6.86518e-13	down	9.45253e-12	-1.04682	down	--	--	Biological Process: response to auxin (GO:0009733);;	K14488|3.4e-73|pper:18768105|K14488 SAUR family protein | (RefSeq) auxin-responsive protein SAUR50	Plant hormone signal transduction (ko04075)	--	--	Auxin responsive protein	Auxin-responsive protein SAUR50 OS=Arabidopsis thaliana OX=3702 GN=SAUR50 PE=1 SV=1	S	Function unknown	auxin-responsive protein SAUR50 [Prunus persica]	biological process: response to stimulus (GO:0050896)
PaF106G0100000566.01	PaF106G0100000566.01	4.21191	520	4.50089	518	4.52241	607	1.8332	246	1.70246	191	1.19227	156	2.88985e-19	1.4817	up	up	up	up	1.1551e-20	up	2.88985e-19	1.4817	up	[K]	Transcription	Biological Process: defense response (GO:0006952);; Molecular Function: ADP binding (GO:0043531);;	K13457|6.4e-105|qsu:112007111|K13457 disease resistance protein RPM1 | (RefSeq) disease resistance protein RPM1-like	Plant-pathogen interaction (ko04626)	[T]	Signal transduction mechanisms	NB-ARC domain	Putative disease resistance protein At1g50180 OS=Arabidopsis thaliana OX=3702 GN=At1g50180 PE=3 SV=2	T	Signal transduction mechanisms	PREDICTED: putative disease resistance protein At1g50180 isoform X1 [Prunus mume]	biological process: response to stimulus (GO:0050896);; molecular function: binding (GO:0005488)
PaF106G0300013667.01	PaF106G0300013667.01	0.567662	66	0.46981	51	0.581316	74	0.197631	25	0.1055	12	0.180911	23	7.93422e-05	1.33163	up	up	up	up	1.68624e-05	up	7.93422e-05	1.33163	up	[K]	Transcription	Molecular Function: ADP binding (GO:0043531);;	K13459|0.0e+00|pmum:103342075|K13459 disease resistance protein RPS2 | (RefSeq) probable disease resistance protein At5g63020	Plant-pathogen interaction (ko04626)	[T]	Signal transduction mechanisms	NB-ARC domain	Probable disease resistance protein At5g63020 OS=Arabidopsis thaliana OX=3702 GN=At5g63020 PE=2 SV=2	T	Signal transduction mechanisms	PREDICTED: probable disease resistance protein At5g63020 [Prunus mume]	molecular function: binding (GO:0005488)
PaF106G0800030767.01	PaF106G0800030767.01	12.252	779	12.4833	741	14.2189	983	4.37349	303	3.92534	227	4.24346	285	2.84055e-39	1.65362	up	up	up	up	4.16997e-41	up	2.84055e-39	1.65362	up	[G]	Carbohydrate transport and metabolism	Molecular Function: UDP-glycosyltransferase activity (GO:0008194);; Cellular Component: intracellular membrane-bounded organelle (GO:0043231);; Molecular Function: quercetin 3-O-glucosyltransferase activity (GO:0080043);; Molecular Function: quercetin 7-O-glucosyltransferase activity (GO:0080044);;	K13691|3.4e-261|pmum:103335041|K13691 pathogen-inducible salicylic acid glucosyltransferase [EC:2.4.1.-] | (RefSeq) UDP-glycosyltransferase 74G1-like	--	[GC]	Carbohydrate transport and metabolism;; Energy production and conversion	UDP-glucoronosyl and UDP-glucosyl transferase	UDP-glycosyltransferase 74G1 OS=Stevia rebaudiana OX=55670 GN=UGT74G1 PE=1 SV=1	--	--	PREDICTED: UDP-glycosyltransferase 74G1-like [Prunus mume]	molecular function: catalytic activity (GO:0003824);; cellular component: cell (GO:0005623);; cellular component: organelle (GO:0043226);; cellular component: cell part (GO:0044464)
PaF106G0100004904.01	PaF106G0100004904.01	0.952697	98	1.34405	129	1.73264	186	5.03751	526	6.77421	583	4.22257	437	2.50007e-16	-1.69197	down	down	down	down	1.21951e-17	down	2.50007e-16	-1.69197	down	--	--	Molecular Function: DNA binding (GO:0003677);; Molecular Function: transcription factor activity, sequence-specific DNA binding (GO:0003700);; Cellular Component: nucleus (GO:0005634);;	K09285|0.0e+00|pper:18788684|K09285 AP2-like factor, ANT lineage | (RefSeq) AP2-like ethylene-responsive transcription factor ANT	--	--	--	AP2 domain	AP2-like ethylene-responsive transcription factor CRL5 OS=Oryza sativa subsp. japonica OX=39947 GN=CRL5 PE=2 SV=1	K	Transcription	unnamed protein product [Prunus armeniaca]	molecular function: binding (GO:0005488);; biological process: biological regulation (GO:0065007);; molecular function: nucleic acid binding transcription factor activity (GO:0001071);; cellular component: cell (GO:0005623);; cellular component: organelle (GO:0043226);; cellular component: cell part (GO:0044464)
PaF106G0800032588.01	PaF106G0800032588.01	2.12865	329	2.66032	356	3.51911	549	0	0	0.009995	2	0	0	8.33801e-80	5.69611	up	up	up	up	3.77946e-82	up	8.33801e-80	5.69611	up	--	--	Molecular Function: protein binding (GO:0005515);; Biological Process: signal transduction (GO:0007165);; Molecular Function: ADP binding (GO:0043531);;	K00695|6.2e-141|mtr:MTR_6g478030|K00695 sucrose synthase [EC:2.4.1.13] | (RefSeq) sucrose synthase	Starch and sucrose metabolism (ko00500)	--	--	TIR domain	Disease resistance protein Roq1 OS=Nicotiana benthamiana OX=4100 GN=ROQ1 PE=1 SV=1	T	Signal transduction mechanisms	TMV resistance protein N-like [Prunus avium]	molecular function: binding (GO:0005488);; biological process: cellular process (GO:0009987);; biological process: biological regulation (GO:0065007)
PaF106G0400016118.01	PaF106G0400016118.01	0.186539	35	0.246171	43	0.257485	53	0.657817	135	0.802147	137	0.572061	114	2.45562e-06	-1.27366	down	down	down	down	3.88189e-07	down	2.45562e-06	-1.27366	down	--		Molecular Function: protein kinase activity (GO:0004672);; Molecular Function: ATP binding (GO:0005524);; Molecular Function: carbohydrate binding (GO:0030246);;	K22133|1.4e-73|egr:104443803|K22133 oxalate---CoA ligase [EC:6.2.1.8] | (RefSeq) oxalate--CoA ligase isoform X2	Glyoxylate and dicarboxylate metabolism (ko00630)	--	--	Protein kinase domain	L-type lectin-domain containing receptor kinase IX.1 OS=Arabidopsis thaliana OX=3702 GN=LECRK91 PE=1 SV=1	T	Signal transduction mechanisms	L-type lectin-domain containing receptor kinase IX.1-like [Prunus yedoensis var. nudiflora]	biological process: metabolic process (GO:0008152);; biological process: cellular process (GO:0009987);; molecular function: catalytic activity (GO:0003824);; molecular function: binding (GO:0005488)
PaF106G0100001238.01	PaF106G0100001238.01	16.16	1251	13.0274	949	14.6387	1215	7.09405	604	7.18726	495	6.08449	502	6.82884e-20	1.14731	up	up	up	up	2.61349e-21	up	6.82884e-20	1.14731	up	[T]	Signal transduction mechanisms	Molecular Function: protein serine/threonine kinase activity (GO:0004674);; Molecular Function: ATP binding (GO:0005524);; Biological Process: signal transduction (GO:0007165);;	K07198|8.9e-235|pper:18789171|K07198 5'-AMP-activated protein kinase, catalytic alpha subunit [EC:2.7.11.11] | (RefSeq) CBL-interacting serine/threonine-protein kinase 1 isoform X2	--	[T]	Signal transduction mechanisms	Protein kinase domain	CBL-interacting serine/threonine-protein kinase 1 OS=Arabidopsis thaliana OX=3702 GN=CIPK1 PE=1 SV=2	T	Signal transduction mechanisms	unnamed protein product [Prunus armeniaca]	biological process: metabolic process (GO:0008152);; biological process: cellular process (GO:0009987);; molecular function: catalytic activity (GO:0003824);; molecular function: binding (GO:0005488);; biological process: biological regulation (GO:0065007)
PaF106G0300012326.01	PaF106G0300012326.01	3.21169	178	1.65494	148	3.39445	209	1.11913	90	0.88889	47	0.432974	44	3.52142e-08	1.4394	up	up	up	up	4.05033e-09	up	3.52142e-08	1.4394	up	--	--	Molecular Function: UDP-glycosyltransferase activity (GO:0008194);;	K23452|1.1e-149|eus:EUTSA_v10009957mg|K23452 UDP-glucosyltransferase 85A [EC:2.4.1.-] | (RefSeq) hypothetical protein	Zeatin biosynthesis (ko00908)	[GC]	Carbohydrate transport and metabolism;; Energy production and conversion	UDP-glucoronosyl and UDP-glucosyl transferase	7-deoxyloganetin glucosyltransferase OS=Catharanthus roseus OX=4058 GN=UGT85A23 PE=1 SV=1	--	--	UDP-glucosyl transferase 85A2, partial [Prunus dulcis]	molecular function: catalytic activity (GO:0003824)
PaF106G0800032137.01	PaF106G0800032137.01	0.009529	1	0	0	0.004775	1	3.63295	218	3.15297	158	4.67626	271	1.09212e-46	-4.65636	down	down	down	down	1.19259e-48	down	1.09212e-46	-4.65636	down	--	--	Molecular Function: protein binding (GO:0005515);; Biological Process: biological_process (GO:0008150);; Biological Process: tissue development (GO:0009888);; Biological Process: meristem maintenance (GO:0010073);; Biological Process: multicellular organismal process (GO:0032501);; Biological Process: developmental process (GO:0032502);; Biological Process: meristem development (GO:0048507);; Bio…	--	--	[R]	General function prediction only	Leucine rich repeat	Receptor-like protein 7 OS=Arabidopsis thaliana OX=3702 GN=RLP7 PE=3 SV=2	S	Function unknown	receptor like protein 30-like [Prunus avium]	molecular function: binding (GO:0005488);; biological process: developmental process (GO:0032502);; biological process: multicellular organismal process (GO:0032501);; biological process: single-organism process (GO:0044699)
PaF106G0500019952.01	PaF106G0500019952.01	14.4385	1703	14.9384	1656	15.316	1981	6.26941	810	5.39323	583	4.66978	586	3.39469e-41	1.48934	up	up	up	up	4.58127e-43	up	3.39469e-41	1.48934	up	--	--	Cellular Component: integral component of membrane (GO:0016021);; Molecular Function: cellulose synthase (UDP-forming) activity (GO:0016760);; Biological Process: cellulose biosynthetic process (GO:0030244);; Biological Process: cell wall organization (GO:0071555);;	K10999|5.3e-102|pda:103707441|K10999 cellulose synthase A [EC:2.4.1.12] | (RefSeq) LOW QUALITY PROTEIN: cellulose synthase A catalytic subunit 9 [UDP-forming]-like	--	--	--	Cellulose synthase	Cellulose synthase-like protein G3 OS=Arabidopsis thaliana OX=3702 GN=CSLG3 PE=2 SV=2	G	Carbohydrate transport and metabolism	unnamed protein product [Prunus armeniaca]	cellular component: membrane (GO:0016020);; cellular component: membrane part (GO:0044425);; molecular function: catalytic activity (GO:0003824);; biological process: metabolic process (GO:0008152);; biological process: cellular process (GO:0009987);; biological process: single-organism process (GO:0044699);; biological process: cellular component organization or biogenesis (GO:0071840)
PaF106G0400016911.01	PaF106G0400016911.01	0.107571	11	0.088758	9	0.051852	6	0.618796	67	0.800408	73	0.470115	50	1.419e-07	-1.87479	down	down	down	down	1.8061e-08	down	1.419e-07	-1.87479	down	--	--	Cellular Component: integral component of membrane (GO:0016021);;	K13466|9.0e-21|cit:102616085|K13466 EIX receptor 1/2 | (RefSeq) receptor-like protein EIX1	Plant-pathogen interaction (ko04626)	[R]	General function prediction only	Leucine rich repeat	Receptor-like protein EIX1 OS=Solanum lycopersicum OX=4081 GN=EIX1 PE=2 SV=2	S	Function unknown	probable LRR receptor-like serine/threonine-protein kinase At4g36180 [Prunus avium]	cellular component: membrane (GO:0016020);; cellular component: membrane part (GO:0044425)
PaF106G0600024874.01	PaF106G0600024874.01	4.71245	242	3.81299	186	4.5295	263	2.03131	127	2.07659	109	1.14827	70	2.35066e-06	1.12389	up	up	up	up	3.70022e-07	up	2.35066e-06	1.12389	up	--	--	Biological Process: response to molecule of bacterial origin (GO:0002237);; Molecular Function: molecular_function (GO:0003674);; Molecular Function: catalytic activity (GO:0003824);; Molecular Function: protein kinase activity (GO:0004672);; Molecular Function: protein serine/threonine kinase activity (GO:0004674);; Cellular Component: cellular_component (GO:0005575);; Cellular Component: cell (…	K22133|1.9e-10|egr:104443802|K22133 oxalate---CoA ligase [EC:6.2.1.8] | (RefSeq) oxalate--CoA ligase	Glyoxylate and dicarboxylate metabolism (ko00630)	[T]	Signal transduction mechanisms	Protein tyrosine and serine/threonine kinase	Cold-responsive protein kinase 1 OS=Arabidopsis thaliana OX=3702 GN=CRPK1 PE=1 SV=1	T	Signal transduction mechanisms	unnamed protein product [Prunus armeniaca]	biological process: response to stimulus (GO:0050896);; molecular function: catalytic activity (GO:0003824);; biological process: metabolic process (GO:0008152);; biological process: cellular process (GO:0009987);; cellular component: cell (GO:0005623);; cellular component: membrane (GO:0016020);; cellular component: cell part (GO:0044464);; biological process: multi-organism process (GO:0051704)…
PaF106G0300012543.01	PaF106G0300012543.01	6.72146	428	6.89476	410	5.35679	371	1.46581	102	1.50892	88	1.35045	91	4.73944e-28	2.05414	up	up	up	up	1.09856e-29	up	4.73944e-28	2.05414	up	[QV]	Secondary metabolites biosynthesis, transport and catabolism;; Defense mechanisms	Molecular Function: monooxygenase activity (GO:0004497);; Molecular Function: iron ion binding (GO:0005506);; Cellular Component: integral component of membrane (GO:0016021);; Molecular Function: oxidoreductase activity, acting on paired donors, with incorporation or reduction of molecular oxygen (GO:0016705);; Molecular Function: heme binding (GO:0020037);;	K07437|1.3e-274|pmum:103328825|K07437 cytochrome P450 family 26 subfamily A | (RefSeq) taxadiene 5-alpha hydroxylase	--	[QI]	Secondary metabolites biosynthesis, transport and catabolism;; Lipid transport and metabolism	Cytochrome P450	Taxadiene 5-alpha hydroxylase OS=Taxus cuspidata OX=99806 PE=1 SV=2	Q	Secondary metabolites biosynthesis, transport and catabolism	PREDICTED: taxadiene 5-alpha hydroxylase [Prunus mume]	biological process: metabolic process (GO:0008152);; biological process: single-organism process (GO:0044699);; molecular function: catalytic activity (GO:0003824);; molecular function: binding (GO:0005488);; cellular component: membrane (GO:0016020);; cellular component: membrane part (GO:0044425)
PaF106G0100006225.01	PaF106G0100006225.01	0.158136	9	0.169793	9	0.35452	21	0.801643	47	1.13926	55	1.08131	61	0.00015125	-1.3793	down	down	down	down	3.42871e-05	down	0.00015125	-1.3793	down	--	--	Molecular Function: protein dimerization activity (GO:0046983);;	K13422|1.8e-12|pop:18094165|K13422 transcription factor MYC2 | (RefSeq) transcription factor MYC2	MAPK signaling pathway - plant (ko04016);; Plant hormone signal transduction (ko04075)	--	--	Helix-loop-helix DNA-binding domain	Transcription factor bHLH93 OS=Arabidopsis thaliana OX=3702 GN=BHLH93 PE=1 SV=1	K	Transcription	beta HLH protein 93 [Prunus dulcis]	molecular function: binding (GO:0005488)
PaF106G0500020568.01	PaF106G0500020568.01	3.16386	283	2.46319	205	2.83635	276	0.445764	44	1.39191	113	1.46387	138	0.000117303	1.16959	up	up	up	up	2.58907e-05	up	0.000117303	1.16959	up	--	--	Molecular Function: ubiquitin-protein transferase activity (GO:0004842);;	K10260|1.9e-19|mpp:MICPUCDRAFT_56233|K10260 F-box and WD-40 domain protein 7 | (RefSeq) WD40 repeat protein	Ubiquitin mediated proteolysis (ko04120)	[S]	Function unknown	U-box domain	U-box domain-containing protein 18 OS=Arabidopsis thaliana OX=3702 GN=PUB18 PE=1 SV=1	S	Function unknown	unnamed protein product [Prunus armeniaca]	molecular function: catalytic activity (GO:0003824)
Prunus_sibirica_newGene_1788	--	0.161548	8	0.207423	10	0.121442	7	2.44347	128	2.99362	129	1.19232	61	3.67284e-13	-2.48091	down	down	down	down	2.33644e-14	down	3.67284e-13	-2.48091	down	--	--	Biological Process: reproduction (GO:0000003);; Biological Process: regionalization (GO:0003002);; Biological Process: developmental process involved in reproduction (GO:0003006);; Molecular Function: molecular_function (GO:0003674);; Molecular Function: nucleic acid binding (GO:0003676);; Molecular Function: DNA binding (GO:0003677);; Molecular Function: transcription factor activity, sequence-s…	K08081|9.8e-11|thj:104827446|K08081 tropinone reductase I [EC:1.1.1.206] | (RefSeq) tropinone reductase homolog At5g06060-like	Tropane, piperidine and pyridine alkaloid biosynthesis (ko00960)	--	--	C2H2-type zinc finger	Zinc finger protein 11 OS=Arabidopsis thaliana OX=3702 GN=ZFP11 PE=2 SV=1	S	Function unknown	unnamed protein product [Prunus armeniaca]	biological process: reproduction (GO:0000003);; biological process: multicellular organismal process (GO:0032501);; biological process: developmental process (GO:0032502);; biological process: single-organism process (GO:0044699);; biological process: reproductive process (GO:0022414);; molecular function: binding (GO:0005488);; biological process: biological regulation (GO:0065007);; molecular f…
Prunus_sibirica_newGene_1866	--	9.04929	848	7.89733	744	7.65334	800	23.818	2892	24.6604	2319	24.0052	2502	6.23909e-55	-1.56385	down	down	down	down	5.2062e-57	down	6.23909e-55	-1.56385	down	--	--	Molecular Function: nucleic acid binding (GO:0003676);; Biological Process: DNA integration (GO:0015074);; Molecular Function: kinase activity (GO:0016301);;	K12447|1.7e-217|thj:104808371|K12447 UDP-sugar pyrophosphorylase [EC:2.7.7.64] | (RefSeq) uncharacterized protein LOC104808371	Pentose and glucuronate interconversions (ko00040);; Galactose metabolism (ko00052);; Ascorbate and aldarate metabolism (ko00053);; Amino sugar and nucleotide sugar metabolism (ko00520)	[R]	General function prediction only	Reverse transcriptase (RNA-dependent DNA polymerase)	Retrovirus-related Pol polyprotein from transposon RE1 OS=Arabidopsis thaliana OX=3702 GN=RE1 PE=2 SV=1	L	Replication, recombination and repair	wall-associated kinase 2 [Prunus dulcis]	molecular function: binding (GO:0005488);; biological process: metabolic process (GO:0008152);; biological process: cellular process (GO:0009987);; molecular function: catalytic activity (GO:0003824)
PaF106G0200007390.01	PaF106G0200007390.01	0.779435	170	1.01102	199	0.888456	211	2.15717	493	2.28175	423	2.31136	502	1.82287e-13	-1.14721	down	down	down	down	1.13988e-14	down	1.82287e-13	-1.14721	down	[R]	General function prediction only	Molecular Function: ADP binding (GO:0043531);;	K12818|3.6e-164|mtr:MTR_0267s0070|K12818 ATP-dependent RNA helicase DHX8/PRP22 [EC:3.6.4.13] | (RefSeq) NB-ARC domain disease resistance protein, putative	Spliceosome (ko03040)	[T]	Signal transduction mechanisms	NB-ARC domain	Putative disease resistance RPP13-like protein 1 OS=Arabidopsis thaliana OX=3702 GN=RPPL1 PE=3 SV=1	T	Signal transduction mechanisms	PREDICTED: LOW QUALITY PROTEIN: putative disease resistance RPP13-like protein 1 [Prunus mume]	molecular function: binding (GO:0005488)
PaF106G0200010082.01	PaF106G0200010082.01	3.37931	156	2.11246	92	3.78317	206	22.0625	1171	19.1037	901	14.7466	789	6.28642e-36	-2.39767	down	down	down	down	1.02e-37	down	6.28642e-36	-2.39767	down	--	--	Molecular Function: peroxidase activity (GO:0004601);; Cellular Component: extracellular region (GO:0005576);; Biological Process: response to oxidative stress (GO:0006979);; Molecular Function: heme binding (GO:0020037);; Biological Process: hydrogen peroxide catabolic process (GO:0042744);; Molecular Function: metal ion binding (GO:0046872);;	K00430|2.0e-110|pmum:103332863|K00430 peroxidase [EC:1.11.1.7] | (RefSeq) peroxidase 4-like	Phenylpropanoid biosynthesis (ko00940)	--	--	Peroxidase	Peroxidase 4 OS=Vitis vinifera OX=29760 GN=GSVIVT00023967001 PE=1 SV=1	T	Signal transduction mechanisms	PREDICTED: peroxidase 4-like [Prunus mume]	biological process: metabolic process (GO:0008152);; biological process: cellular process (GO:0009987);; biological process: single-organism process (GO:0044699);; biological process: response to stimulus (GO:0050896);; biological process: detoxification (GO:0098754);; molecular function: catalytic activity (GO:0003824);; molecular function: antioxidant activity (GO:0016209);; cellular component:…
PaF106G0800031262.01	PaF106G0800031262.01	1.13274	109	3.21068	273	3.32991	327	6.36196	636	11.0324	929	6.63744	641	0.00368707	-1.08761	down	down	down	down	0.00116648	down	0.00368707	-1.08761	down	--	--	--	--	--	--	--	--	--	--	--	unnamed protein product [Prunus armeniaca]	--
PaF106G0700027390.01	PaF106G0700027390.01	0.351361	36	0.075445	8	0.436777	49	8.00483	845	8.0881	712	5.73906	573	1.68202e-11	-2.51283	down	down	down	down	1.26061e-12	down	1.68202e-11	-2.51283	down	--	--	Molecular Function: DNA binding (GO:0003677);; Cellular Component: nucleus (GO:0005634);;	--	--	--	--	B3 DNA binding domain	Putative B3 domain-containing protein Os03g0621600 OS=Oryza sativa subsp. japonica OX=39947 GN=Os03g0621600 PE=3 SV=1	K	Transcription	B3 domain-containing protein Os03g0619600-like [Prunus avium]	molecular function: binding (GO:0005488);; cellular component: cell (GO:0005623);; cellular component: organelle (GO:0043226);; cellular component: cell part (GO:0044464)
PaF106G0300013971.01	PaF106G0300013971.01	5.94713	737	6.06982	701	7.10693	957	1.67445	226	1.34309	152	1.51124	198	2.99383e-49	2.06289	up	up	up	up	3.05335e-51	up	2.99383e-49	2.06289	up	--	--	Biological Process: telomere maintenance (GO:0000723);; Molecular Function: DNA helicase activity (GO:0003678);; Molecular Function: ATP binding (GO:0005524);; Biological Process: DNA repair (GO:0006281);; Biological Process: DNA recombination (GO:0006310);;	K07466|2.2e-119|pper:18792188|K07466 replication factor A1 | (RefSeq) replication protein A 70 kDa DNA-binding subunit B	DNA replication (ko03030);; Nucleotide excision repair (ko03420);; Mismatch repair (ko03430);; Homologous recombination (ko03440)	--	--	Replication factor-A C terminal domain	--	L	Replication, recombination and repair	unnamed protein product [Prunus armeniaca]	biological process: metabolic process (GO:0008152);; biological process: cellular process (GO:0009987);; biological process: biological regulation (GO:0065007);; biological process: cellular component organization or biogenesis (GO:0071840);; molecular function: catalytic activity (GO:0003824);; molecular function: binding (GO:0005488);; biological process: response to stimulus (GO:0050896)
PaF106G0800032329.01	PaF106G0800032329.01	0.596696	72	0.403031	45	0.563639	74	1.34739	175	1.54994	165	1.09298	130	4.39129e-05	-1.06787	down	down	down	down	8.85994e-06	down	4.39129e-05	-1.06787	down	--	--	Molecular Function: zinc ion binding (GO:0008270);; Biological Process: RNA modification (GO:0009451);; Cellular Component: intracellular membrane-bounded organelle (GO:0043231);;	K22733|1.8e-29|cit:102612526|K22733 magnesium transporter | (RefSeq) uncharacterized protein LOC102612526	--	[R]	General function prediction only	DYW family of nucleic acid deaminases	Pentatricopeptide repeat-containing protein At4g32450, mitochondrial OS=Arabidopsis thaliana OX=3702 GN=PCMP-H63 PE=2 SV=1	S	Function unknown	hypothetical protein PRUPE_8G043900 [Prunus persica]	molecular function: binding (GO:0005488);; biological process: metabolic process (GO:0008152);; biological process: cellular process (GO:0009987);; cellular component: cell (GO:0005623);; cellular component: organelle (GO:0043226);; cellular component: cell part (GO:0044464)
PaF106G0500018678.01	PaF106G0500018678.01	0.246911	17	0.455334	29	0.254439	19	5.61285	382	5.26455	306	4.62434	311	3.06821e-46	-3.372	down	down	down	down	3.4769e-48	down	3.06821e-46	-3.372	down	--	--	Molecular Function: transferase activity, transferring acyl groups other than amino-acyl groups (GO:0016747);;	K19861|1.5e-155|pavi:110755953|K19861 benzyl alcohol O-benzoyltransferase [EC:2.3.1.196 2.3.1.232] | (RefSeq) benzyl alcohol O-benzoyltransferase	--	--	--	Transferase family	Methanol O-anthraniloyltransferase OS=Vitis labrusca OX=103355 GN=AMAT PE=1 SV=1	S	Function unknown	methanol O-anthraniloyltransferase [Prunus persica]	molecular function: catalytic activity (GO:0003824)
PaF106G0600024535.01	PaF106G0600024535.01	23.2512	470	26.8272	506	28.1394	618	69.6872	1532	81.1108	1490	88.0083	1876	6.37467e-33	-1.49442	down	down	down	down	1.17879e-34	down	6.37467e-33	-1.49442	down	--	--	Cellular Component: nucleosome (GO:0000786);; Molecular Function: DNA binding (GO:0003677);; Cellular Component: nucleus (GO:0005634);; Biological Process: nucleosome assembly (GO:0006334);; Cellular Component: host cell nucleus (GO:0042025);; Molecular Function: protein heterodimerization activity (GO:0046982);;	K11254|7.1e-50|adu:107458448|K11254 histone H4 | (RefSeq) histone H4	--	[B]	Chromatin structure and dynamics	Centromere kinetochore component CENP-T histone fold	Histone H4 variant TH011 OS=Triticum aestivum OX=4565 PE=3 SV=2	B	Chromatin structure and dynamics	PREDICTED: uncharacterized protein LOC107825453 [Nicotiana tabacum]	cellular component: cell (GO:0005623);; cellular component: macromolecular complex (GO:0032991);; cellular component: organelle (GO:0043226);; cellular component: organelle part (GO:0044422);; cellular component: cell part (GO:0044464);; molecular function: binding (GO:0005488);; biological process: cellular process (GO:0009987);; biological process: cellular component organization or biogenesis …
PaF106G0200008088.01	PaF106G0200008088.01	0.109719	11	0.122307	12	0.142685	16	1.35683	145	1.24567	112	0.874018	91	6.83874e-15	-2.39304	down	down	down	down	3.75507e-16	down	6.83874e-15	-2.39304	down	--	--	Cellular Component: integral component of membrane (GO:0016021);;	K13466|4.8e-23|cit:102619059|K13466 EIX receptor 1/2 | (RefSeq) receptor-like protein EIX2	Plant-pathogen interaction (ko04626)	--	--	Leucine rich repeat	Tyrosine-sulfated glycopeptide receptor 1 OS=Arabidopsis thaliana OX=3702 GN=PSY1R PE=1 SV=1	T	Signal transduction mechanisms	receptor-like protein 3 [Prunus dulcis]	cellular component: membrane (GO:0016020);; cellular component: membrane part (GO:0044425)
PaF106G0100000801.01	PaF106G0100000801.01	59.471	3038	60.4912	2882	78.935	4384	22.3366	1242	20.18	938	13.9124	750	1.95581e-36	1.8171	up	up	up	up	3.12301e-38	up	1.95581e-36	1.8171	up	[G]	Carbohydrate transport and metabolism	Molecular Function: hydrolase activity, hydrolyzing O-glycosyl compounds (GO:0004553);; Cellular Component: cell wall (GO:0005618);; Biological Process: xyloglucan metabolic process (GO:0010411);; Molecular Function: xyloglucan:xyloglucosyl transferase activity (GO:0016762);; Biological Process: cell wall biogenesis (GO:0042546);; Cellular Component: apoplast (GO:0048046);; Biological Process: ce…	K14504|4.7e-160|pmum:103323608|K14504 xyloglucan:xyloglucosyl transferase TCH4 [EC:2.4.1.207] | (RefSeq) probable xyloglucan endotransglucosylase/hydrolase protein 23	Plant hormone signal transduction (ko04075)	--	--	Glycosyl hydrolases family 16	Probable xyloglucan endotransglucosylase/hydrolase protein 23 OS=Arabidopsis thaliana OX=3702 GN=XTH23 PE=2 SV=1	G	Carbohydrate transport and metabolism	PREDICTED: probable xyloglucan endotransglucosylase/hydrolase protein 23 [Prunus mume]	molecular function: catalytic activity (GO:0003824);; cellular component: cell (GO:0005623);; cellular component: cell part (GO:0044464);; biological process: metabolic process (GO:0008152);; biological process: cellular process (GO:0009987);; biological process: cellular component organization or biogenesis (GO:0071840);; cellular component: extracellular region (GO:0005576)
PaF106G0200007609.01	PaF106G0200007609.01	2.14582	123	3.06395	163	2.00167	124	9.48008	588	12.4611	646	11.9273	717	6.17014e-27	-2.01099	down	down	down	down	1.53824e-28	down	6.17014e-27	-2.01099	down	--	--	Biological Process: signal transduction (GO:0007165);; Molecular Function: ADP binding (GO:0043531);;	K00695|2.9e-25|mtr:MTR_6g478030|K00695 sucrose synthase [EC:2.4.1.13] | (RefSeq) sucrose synthase	Starch and sucrose metabolism (ko00500)	--	--	NB-ARC domain	Disease resistance protein Roq1 OS=Nicotiana benthamiana OX=4100 GN=ROQ1 PE=1 SV=1	S	Function unknown	PREDICTED: TMV resistance protein N-like [Prunus mume]	biological process: cellular process (GO:0009987);; biological process: biological regulation (GO:0065007);; molecular function: binding (GO:0005488)
PaF106G0500018981.01	PaF106G0500018981.01	4.79869	342	4.61488	304	5.90882	450	12.9433	965	13.8212	872	12.2681	881	6.15702e-21	-1.19731	down	down	down	down	2.22952e-22	down	6.15702e-21	-1.19731	down	--	--	Molecular Function: protein kinase activity (GO:0004672);; Molecular Function: ATP binding (GO:0005524);; Biological Process: brassinosteroid mediated signaling pathway (GO:0009742);;	K14500|6.0e-288|pmum:103336934|K14500 BR-signaling kinase [EC:2.7.11.1] | (RefSeq) probable serine/threonine-protein kinase At5g41260	Plant hormone signal transduction (ko04075)	--	--	Protein kinase domain	Serine/threonine-protein kinase BSK2 OS=Arabidopsis thaliana OX=3702 GN=BSK2 PE=1 SV=1	T	Signal transduction mechanisms	hypothetical protein PRUPE_5G041700 [Prunus persica]	biological process: metabolic process (GO:0008152);; biological process: cellular process (GO:0009987);; molecular function: catalytic activity (GO:0003824);; molecular function: binding (GO:0005488);; biological process: signaling (GO:0023052);; biological process: single-organism process (GO:0044699);; biological process: response to stimulus (GO:0050896);; biological process: biological regula…
PaF106G0300013402.01	PaF106G0300013402.01	3.01643	285	5.51753	486	3.04947	313	23.0048	2364	8.83579	759	9.96885	993	0.00232419	-1.1607	down	down	down	down	0.000700106	down	0.00232419	-1.1607	down	--	--	Cellular Component: cellular_component (GO:0005575);; Cellular Component: membrane (GO:0016020);; Cellular Component: intrinsic component of membrane (GO:0031224);; Cellular Component: anchored component of membrane (GO:0031225);; Cellular Component: membrane part (GO:0044425);;	--	--	--	--	Fasciclin domain	Fasciclin-like arabinogalactan protein 14 OS=Arabidopsis thaliana OX=3702 GN=FLA14 PE=2 SV=1	S	Function unknown	PREDICTED: fasciclin-like arabinogalactan protein 8 [Prunus mume]	cellular component: membrane (GO:0016020);; cellular component: membrane part (GO:0044425)
PaF106G0400016527.01	PaF106G0400016527.01	0	0	0	0	0	0	0.633614	56	0.571582	43	0.710092	61	1.21312e-14	-2.88396	down	down	down	down	6.81104e-16	down	1.21312e-14	-2.88396	down	[T]	Signal transduction mechanisms	Cellular Component: membrane (GO:0016020);; Cellular Component: integral component of membrane (GO:0016021);;	K15503|1.4e-44|hbr:110673220|K15503 serine/threonine-protein phosphatase 6 regulatory ankyrin repeat subunit B | (RefSeq) uncharacterized protein LOC110673220	--	[R]	General function prediction only	Ankyrin repeats (3 copies)	--	S	Function unknown	ankyrin repeat-containing protein At5g02620 [Prunus persica]	cellular component: membrane (GO:0016020);; cellular component: membrane part (GO:0044425)
PaF106G0200007544.01	PaF106G0200007544.01	36.5403	3539	31.733	2866	33.8703	3566	0.178846	19	0.21103	19	0.326465	34	0	6.72239	up	up	up	up	0	up	0	6.72239	up	--	--	Biological Process: signal transduction (GO:0007165);; Molecular Function: ADP binding (GO:0043531);;	K13459|7.4e-06|egu:105052098|K13459 disease resistance protein RPS2 | (RefSeq) probable disease resistance protein At1g12280	Plant-pathogen interaction (ko04626)	--	--	Leucine Rich repeats (2 copies)	Protein SUPPRESSOR OF npr1-1, CONSTITUTIVE 1 OS=Arabidopsis thaliana OX=3702 GN=SNC1 PE=1 SV=5	T	Signal transduction mechanisms	disease resistance protein RPS4-like [Prunus avium]	biological process: cellular process (GO:0009987);; biological process: biological regulation (GO:0065007);; molecular function: binding (GO:0005488)
PaF106G0400016052.01	PaF106G0400016052.01	1.91333	114	2.70529	151	2.08812	136	0.949903	62	0.985032	54	0.815893	52	5.67609e-06	1.1777	up	up	up	up	9.61608e-07	up	5.67609e-06	1.1777	up	[V]	Defense mechanisms	Molecular Function: antiporter activity (GO:0015297);; Cellular Component: integral component of membrane (GO:0016021);; Molecular Function: xenobiotic transporter activity (GO:0042910);;	K03327|1.6e-231|pavi:110745431|K03327 multidrug resistance protein, MATE family | (RefSeq) protein DETOXIFICATION 19-like	--	[R]	General function prediction only	MatE	Protein DETOXIFICATION 19 OS=Arabidopsis thaliana OX=3702 GN=DTX19 PE=2 SV=1	V	Defense mechanisms	unnamed protein product [Prunus armeniaca]	biological process: localization (GO:0051179);; molecular function: transporter activity (GO:0005215);; cellular component: membrane (GO:0016020);; cellular component: membrane part (GO:0044425)
PaF106G0200008233.01	PaF106G0200008233.01	1.27182	62	0.961983	44	0.979233	52	0.403051	22	0.257908	12	0.226803	12	0.000166069	1.3399	up	up	up	up	3.80743e-05	up	0.000166069	1.3399	up	--	--	Molecular Function: transcription regulatory region sequence-specific DNA binding (GO:0000976);; Molecular Function: RNA polymerase II regulatory region sequence-specific DNA binding (GO:0000977);; Molecular Function: RNA polymerase II transcription factor activity, sequence-specific DNA binding (GO:0000981);; Molecular Function: core promoter proximal region sequence-specific DNA binding (GO:000…	K09264|4.3e-09|psom:113281851|K09264 MADS-box transcription factor, plant | (RefSeq) agamous-like MADS-box protein AGL9 homolog isoform X1	--	[K]	Transcription	SRF-type transcription factor (DNA-binding and dimerisation domain)	Agamous-like MADS-box protein AGL82 OS=Arabidopsis thaliana OX=3702 GN=AGL82 PE=1 SV=1	K	Transcription	PREDICTED: MADS-box transcription factor 50-like [Prunus mume]	molecular function: binding (GO:0005488);; biological process: biological regulation (GO:0065007);; molecular function: nucleic acid binding transcription factor activity (GO:0001071);; cellular component: cell (GO:0005623);; cellular component: organelle (GO:0043226);; cellular component: cell part (GO:0044464)
PaF106G0300012442.01	PaF106G0300012442.01	1.51576	121	1.44949	108	1.82798	160	4.35775	380	4.53992	325	3.49263	289	2.78995e-10	-1.19197	down	down	down	down	2.40711e-11	down	2.78995e-10	-1.19197	down	[V]	Defense mechanisms	Cellular Component: vacuolar membrane (GO:0005774);; Molecular Function: solute:proton antiporter activity (GO:0015299);; Cellular Component: membrane (GO:0016020);; Cellular Component: integral component of membrane (GO:0016021);; Molecular Function: transmembrane transporter activity (GO:0022857);; Molecular Function: xenobiotic transporter activity (GO:0042910);;	K03327|1.1e-276|pmum:103328959|K03327 multidrug resistance protein, MATE family | (RefSeq) protein DETOXIFICATION 41-like	--	[R]	General function prediction only	MatE	Protein DETOXIFICATION 41 OS=Arabidopsis thaliana OX=3702 GN=DTX41 PE=2 SV=1	V	Defense mechanisms	unnamed protein product [Prunus armeniaca]	cellular component: cell (GO:0005623);; cellular component: membrane (GO:0016020);; cellular component: organelle (GO:0043226);; cellular component: organelle part (GO:0044422);; cellular component: cell part (GO:0044464);; biological process: single-organism process (GO:0044699);; biological process: localization (GO:0051179);; molecular function: transporter activity (GO:0005215);; cellular com…
PaF106G0200007243.01	PaF106G0200007243.01	0.881362	170	1.05218	189	0.970735	203	3.7892	793	4.16955	729	4.0017	812	4.2182e-44	-1.89805	down	down	down	down	5.04081e-46	down	4.2182e-44	-1.89805	down	[R]	General function prediction only	Molecular Function: ADP binding (GO:0043531);;	K12818|2.3e-160|mtr:MTR_0267s0070|K12818 ATP-dependent RNA helicase DHX8/PRP22 [EC:3.6.4.13] | (RefSeq) NB-ARC domain disease resistance protein, putative	Spliceosome (ko03040)	[T]	Signal transduction mechanisms	NB-ARC domain	Putative disease resistance RPP13-like protein 1 OS=Arabidopsis thaliana OX=3702 GN=RPPL1 PE=3 SV=1	T	Signal transduction mechanisms	putative disease resistance RPP13-like protein 1 isoform X2 [Prunus dulcis]	molecular function: binding (GO:0005488)
PaF106G0800030033.01	PaF106G0800030033.01	0.081744	12	0.130414	17	0.044628	7	0.588494	87	1.06677	132	0.424509	61	3.75094e-08	-1.95117	down	down	down	down	4.33829e-09	down	3.75094e-08	-1.95117	down	--	--	--	--	--	--	--	--	--	--	--	hypothetical protein TorRG33x02_301890, partial [Trema orientale]	--
PaF106G0100003312.01	PaF106G0100003312.01	1.79919	114	2.23968	132	1.94254	134	0.718455	51	0.866985	50	0.969628	65	1.70795e-05	1.11982	up	up	up	up	3.18823e-06	up	1.70795e-05	1.11982	up	--	--	Molecular Function: DNA binding (GO:0003677);; Cellular Component: nucleus (GO:0005634);;	K09422|1.4e-259|pper:18790530|K09422 transcription factor MYB, plant | (RefSeq) myb-like protein AA	--	[K]	Transcription	Myb-like DNA-binding domain	Transcription factor MYB117 OS=Arabidopsis thaliana OX=3702 GN=MYB117 PE=2 SV=1	--	--	myb-like protein AA [Prunus persica]	molecular function: binding (GO:0005488);; cellular component: cell (GO:0005623);; cellular component: organelle (GO:0043226);; cellular component: cell part (GO:0044464)
PaF106G0100005274.01	PaF106G0100005274.01	3.46552	328	4.95134	438	3.33617	345	0.493558	51	0.574078	50	0.475279	48	2.87065e-35	2.70414	up	up	up	up	4.82039e-37	up	2.87065e-35	2.70414	up	--	--	Biological Process: telomere maintenance (GO:0000723);; Molecular Function: DNA helicase activity (GO:0003678);; Molecular Function: ATP binding (GO:0005524);; Biological Process: DNA repair (GO:0006281);; Biological Process: DNA recombination (GO:0006310);;	K07466|4.6e-189|pper:18792188|K07466 replication factor A1 | (RefSeq) replication protein A 70 kDa DNA-binding subunit B	DNA replication (ko03030);; Nucleotide excision repair (ko03420);; Mismatch repair (ko03430);; Homologous recombination (ko03440)	--	--	Replication protein A OB domain	--	D	Cell cycle control, cell division, chromosome partitioning	unnamed protein product [Prunus armeniaca]	biological process: metabolic process (GO:0008152);; biological process: cellular process (GO:0009987);; biological process: biological regulation (GO:0065007);; biological process: cellular component organization or biogenesis (GO:0071840);; molecular function: catalytic activity (GO:0003824);; molecular function: binding (GO:0005488);; biological process: response to stimulus (GO:0050896)
PaF106G0400016192.01	PaF106G0400016192.01	0.233408	46	0.20911	39	0.264068	57	0.04212	10	0.052463	10	0.061355	13	2.83996e-05	1.50441	up	up	up	up	5.50143e-06	up	2.83996e-05	1.50441	up	[ET]	Amino acid transport and metabolism;; Signal transduction mechanisms	Cellular Component: plasma membrane (GO:0005886);; Molecular Function: ligand-gated ion channel activity (GO:0015276);; Cellular Component: integral component of membrane (GO:0016021);; Molecular Function: signaling receptor activity (GO:0038023);;	K05387|7.0e-145|egu:105039729|K05387 glutamate receptor, ionotropic, plant | (RefSeq) glutamate receptor 2.8-like	--	[PET]	Inorganic ion transport and metabolism;; Amino acid transport and metabolism;; Signal transduction mechanisms	Receptor family ligand binding region	Glutamate receptor 2.9 OS=Arabidopsis thaliana OX=3702 GN=GLR2.9 PE=2 SV=1	--	--	hypothetical protein PRUPE_4G171700 [Prunus persica]	cellular component: cell (GO:0005623);; cellular component: membrane (GO:0016020);; cellular component: cell part (GO:0044464);; biological process: localization (GO:0051179);; molecular function: transporter activity (GO:0005215);; molecular function: molecular transducer activity (GO:0060089);; cellular component: membrane part (GO:0044425);; biological process: cellular process (GO:0009987);; …
PaF106G0100006311.01	PaF106G0100006311.01	4.3522	231	5.15607	255	5.52214	318	1.32347	77	1.64005	79	1.85823	104	6.01616e-14	1.56518	up	up	up	up	3.63499e-15	up	6.01616e-14	1.56518	up	[IR]	Lipid transport and metabolism;; General function prediction only	Molecular Function: hydrolase activity, acting on ester bonds (GO:0016788);;	K00679|6.5e-45|cic:CICLE_v10027727mg|K00679 phospholipid:diacylglycerol acyltransferase [EC:2.3.1.158] | (RefSeq) hypothetical protein	Glycerolipid metabolism (ko00561)	--	--	GDSL-like Lipase/Acylhydrolase	GDSL esterase/lipase At1g33811 OS=Arabidopsis thaliana OX=3702 GN=At1g33811 PE=2 SV=1	S	Function unknown	unnamed protein product [Prunus armeniaca]	molecular function: catalytic activity (GO:0003824)
PaF106G0100006682.01	PaF106G0100006682.01	0.086736	11	0.188259	21	0.303691	39	5.77557	738	4.90213	523	5.07405	628	1.2019e-78	-4.15306	down	down	down	down	5.57182e-81	down	1.2019e-78	-4.15306	down	--	--	Cellular Component: integral component of membrane (GO:0016021);; Molecular Function: kinase activity (GO:0016301);;	K13466|4.0e-52|jre:108979830|K13466 EIX receptor 1/2 | (RefSeq) receptor-like protein EIX2 isoform X1	Plant-pathogen interaction (ko04626)	[R]	General function prediction only	Leucine rich repeat	Receptor like protein 22 OS=Arabidopsis thaliana OX=3702 GN=RLP22 PE=2 SV=1	Q	Secondary metabolites biosynthesis, transport and catabolism	PREDICTED: probable leucine-rich repeat receptor-like protein kinase At2g33170 [Prunus mume]	cellular component: membrane (GO:0016020);; cellular component: membrane part (GO:0044425);; molecular function: catalytic activity (GO:0003824)
PaF106G0100002088.01	PaF106G0100002088.01	1.42582	118	1.79016	138	1.74464	157	5.43571	488	3.41162	256	2.81476	245	1.32559e-05	-1.03505	down	down	down	down	2.41439e-06	down	1.32559e-05	-1.03505	down	[GI]	Carbohydrate transport and metabolism;; Lipid transport and metabolism	Molecular Function: pectinesterase activity (GO:0030599);; Biological Process: cell wall modification (GO:0042545);; Molecular Function: aspartyl esterase activity (GO:0045330);; Biological Process: pectin catabolic process (GO:0045490);; Molecular Function: pectinesterase inhibitor activity (GO:0046910);;	K01051|5.0e-132|hbr:110663013|K01051 pectinesterase [EC:3.1.1.11] | (RefSeq) pectinesterase 2-like isoform X1	Pentose and glucuronate interconversions (ko00040)	--	--	Pectinesterase	Probable pectinesterase/pectinesterase inhibitor 35 OS=Arabidopsis thaliana OX=3702 GN=PME35 PE=2 SV=1	T	Signal transduction mechanisms	unnamed protein product [Prunus armeniaca]	molecular function: catalytic activity (GO:0003824);; biological process: cellular process (GO:0009987);; biological process: cellular component organization or biogenesis (GO:0071840);; biological process: metabolic process (GO:0008152);; biological process: biological regulation (GO:0065007);; molecular function: molecular function regulator (GO:0098772)
PaF106G0400017487.01	PaF106G0400017487.01	0.574258	76	0.742857	91	0.610477	91	2.45378	350	1.47401	172	2.01521	281	8.07618e-09	-1.36367	down	down	down	down	8.44891e-10	down	8.07618e-09	-1.36367	down	--		Molecular Function: protein kinase activity (GO:0004672);; Molecular Function: ATP binding (GO:0005524);; Cellular Component: integral component of membrane (GO:0016021);;	K13418|2.3e-68|ppp:112278174|K13418 somatic embryogenesis receptor kinase 1 [EC:2.7.10.1 2.7.11.1] | (RefSeq) LRR receptor kinase BAK1-like	--	--	--	Protein kinase domain	Probable LRR receptor-like serine/threonine-protein kinase At1g07650 OS=Arabidopsis thaliana OX=3702 GN=At1g07650 PE=1 SV=1	T	Signal transduction mechanisms	unnamed protein product [Prunus armeniaca]	biological process: metabolic process (GO:0008152);; biological process: cellular process (GO:0009987);; molecular function: catalytic activity (GO:0003824);; molecular function: binding (GO:0005488);; cellular component: membrane (GO:0016020);; cellular component: membrane part (GO:0044425)
PaF106G0300013421.01	PaF106G0300013421.01	6.80248	415	8.09765	421	7.89879	546	24.5119	1674	15.8937	961	26.1386	1588	1.42649e-21	-1.44864	down	down	down	down	4.9891e-23	down	1.42649e-21	-1.44864	down	--	--	Molecular Function: DNA binding (GO:0003677);; Molecular Function: transcription factor activity, sequence-specific DNA binding (GO:0003700);; Cellular Component: nucleus (GO:0005634);;	K09285|1.9e-122|pper:18784307|K09285 AP2-like factor, ANT lineage | (RefSeq) AP2-like ethylene-responsive transcription factor At1g16060	--	--	--	AP2 domain	AP2-like ethylene-responsive transcription factor At1g16060 OS=Arabidopsis thaliana OX=3702 GN=At1g16060 PE=2 SV=1	K	Transcription	unnamed protein product [Prunus armeniaca]	molecular function: binding (GO:0005488);; biological process: biological regulation (GO:0065007);; molecular function: nucleic acid binding transcription factor activity (GO:0001071);; cellular component: cell (GO:0005623);; cellular component: organelle (GO:0043226);; cellular component: cell part (GO:0044464)
PaF106G0800031261.01	PaF106G0800031261.01	0.05067	7	0.501562	17	0.152245	5	1.08443	100	1.44849	60	1.1984	80	3.47563e-08	-1.96234	down	down	down	down	3.99051e-09	down	3.47563e-08	-1.96234	down	--	--	Biological Process: signal transduction (GO:0007165);; Molecular Function: ADP binding (GO:0043531);;	K00695|2.9e-168|mtr:MTR_6g478030|K00695 sucrose synthase [EC:2.4.1.13] | (RefSeq) sucrose synthase	Starch and sucrose metabolism (ko00500)	--	--	TIR domain	Disease resistance protein Roq1 OS=Nicotiana benthamiana OX=4100 GN=ROQ1 PE=1 SV=1	T	Signal transduction mechanisms	TMV resistance protein N [Prunus persica]	biological process: cellular process (GO:0009987);; biological process: biological regulation (GO:0065007);; molecular function: binding (GO:0005488)
PaF106G0700028239.01	PaF106G0700028239.01	0.69925	83	0.463376	51	0.739151	93	2.296	219	2.80261	218	2.33087	226	8.51165e-09	-1.32705	down	down	down	down	8.94394e-10	down	8.51165e-09	-1.32705	down	--	--	Molecular Function: molecular_function (GO:0003674);; Molecular Function: nucleic acid binding (GO:0003676);; Molecular Function: RNA binding (GO:0003723);; Molecular Function: catalytic activity (GO:0003824);; Molecular Function: nuclease activity (GO:0004518);; Molecular Function: endonuclease activity (GO:0004519);; Molecular Function: binding (GO:0005488);; Cellular Component: cellular_compon…	K20291|2.0e-09|mtr:MTR_7g118240|K20291 conserved oligomeric Golgi complex subunit 4 | (RefSeq) PPR containing plant-like protein	--	--	--	PPR repeat family	Pentatricopeptide repeat-containing protein At2g17525, mitochondrial OS=Arabidopsis thaliana OX=3702 GN=At2g17525 PE=2 SV=2	S	Function unknown	PREDICTED: pentatricopeptide repeat-containing protein At2g17525, mitochondrial [Prunus mume]	molecular function: binding (GO:0005488);; molecular function: catalytic activity (GO:0003824);; biological process: metabolic process (GO:0008152);; biological process: cellular process (GO:0009987);; cellular component: cell (GO:0005623);; cellular component: cell part (GO:0044464);; cellular component: organelle (GO:0043226)
PaF106G0700027434.01	PaF106G0700027434.01	1.80548	109	3.56836	200	2.43567	156	0.638312	42	0.810768	45	0.718144	46	1.63917e-08	1.59186	up	up	up	up	1.80179e-09	up	1.63917e-08	1.59186	up	[R]	General function prediction only	Molecular Function: cysteine-type endopeptidase activity (GO:0004197);;	K22684|2.2e-213|pmum:103335918|K22684 metacaspase-1 [EC:3.4.22.-] | (RefSeq) metacaspase-1 isoform X1	--	[DO]	Cell cycle control, cell division, chromosome partitioning;; Posttranslational modification, protein turnover, chaperones	Caspase domain	Metacaspase-1 OS=Arabidopsis thaliana OX=3702 GN=AMC1 PE=1 SV=1	--	--	PREDICTED: metacaspase-1 isoform X1 [Prunus mume]	biological process: metabolic process (GO:0008152);; molecular function: catalytic activity (GO:0003824)
PaF106G0200008854.01	PaF106G0200008854.01	13.7553	1259	9.14186	780	11.2261	1117	5.90759	589	5.40048	450	5.28501	511	9.14931e-12	1.06656	up	up	up	up	6.62611e-13	up	9.14931e-12	1.06656	up	[H]	Coenzyme transport and metabolism	Molecular Function: methyltransferase activity (GO:0008168);; Cellular Component: integral component of membrane (GO:0016021);; Biological Process: methylation (GO:0032259);;	K23872|2.6e-142|gra:105802655|K23872 putative homogalacturonan methyltransferase [EC:2.1.1.-] | (RefSeq) probable methyltransferase PMT13	--	--	--	Putative S-adenosyl-L-methionine-dependent methyltransferase	Probable methyltransferase PMT15 OS=Arabidopsis thaliana OX=3702 GN=At4g00750 PE=2 SV=1	S	Function unknown	unnamed protein product [Prunus armeniaca]	molecular function: catalytic activity (GO:0003824);; cellular component: membrane (GO:0016020);; cellular component: membrane part (GO:0044425);; biological process: metabolic process (GO:0008152)
PaF106G0800032319.01	PaF106G0800032319.01	3.19119	534	3.2436	506	3.32777	605	0.49561	91	0.583699	89	0.442294	78	1.44889e-58	2.61374	up	up	up	up	1.0523e-60	up	1.44889e-58	2.61374	up	[R]	General function prediction only	Biological Process: signal transduction (GO:0007165);; Molecular Function: ADP binding (GO:0043531);;	K00695|5.7e-130|mtr:MTR_6g478030|K00695 sucrose synthase [EC:2.4.1.13] | (RefSeq) sucrose synthase	Starch and sucrose metabolism (ko00500)	--	--	TIR domain	TMV resistance protein N OS=Nicotiana glutinosa OX=35889 GN=N PE=1 SV=1	S	Function unknown	PREDICTED: TMV resistance protein N-like [Prunus mume]	biological process: cellular process (GO:0009987);; biological process: biological regulation (GO:0065007);; molecular function: binding (GO:0005488)
PaF106G0800029853.01	PaF106G0800029853.01	3.2473	77	3.355	74	2.38556	62	1.18699	31	0.502909	11	0.627984	16	1.95777e-05	1.46912	up	up	up	up	3.69287e-06	up	1.95777e-05	1.46912	up	[F]	Nucleotide transport and metabolism	Molecular Function: nucleoside diphosphate kinase activity (GO:0004550);; Biological Process: GTP biosynthetic process (GO:0006183);; Biological Process: UTP biosynthetic process (GO:0006228);; Biological Process: CTP biosynthetic process (GO:0006241);; Biological Process: cellular response to hydrogen peroxide (GO:0070301);;	K00940|9.1e-33|mdm:103439015|K00940 nucleoside-diphosphate kinase [EC:2.7.4.6] | (RefSeq) nucleoside diphosphate kinase 1	Purine metabolism (ko00230);; Pyrimidine metabolism (ko00240);; MAPK signaling pathway - plant (ko04016)	[F]	Nucleotide transport and metabolism	Nucleoside diphosphate kinase	Nucleoside diphosphate kinase 1 OS=Pisum sativum OX=3888 GN=NDPK1 PE=2 SV=1	F	Nucleotide transport and metabolism	unnamed protein product [Prunus armeniaca]	biological process: metabolic process (GO:0008152);; biological process: cellular process (GO:0009987);; molecular function: catalytic activity (GO:0003824);; biological process: single-organism process (GO:0044699);; biological process: response to stimulus (GO:0050896)
PaF106G0800031088.01	PaF106G0800031088.01	0	0	0.079203	3	0.031908	2	1.23838	49	1.51765	50	1.92665	74	4.25942e-12	-2.57548	down	down	down	down	2.96189e-13	down	4.25942e-12	-2.57548	down	--	--	Molecular Function: protein binding (GO:0005515);;	--	--	--	--	F-box domain	--	--	--	putative FBD-associated F-box protein At5g56690 [Prunus persica]	molecular function: binding (GO:0005488)
PaF106G0600022022.01	PaF106G0600022022.01	2.89579	190	5.6213	343	4.15509	296	1.73236	124	0.963539	58	1.60782	111	8.65483e-08	1.40082	up	up	up	up	1.06324e-08	up	8.65483e-08	1.40082	up	[T]	Signal transduction mechanisms	Molecular Function: protein serine/threonine kinase activity (GO:0004674);; Molecular Function: ATP binding (GO:0005524);; Cellular Component: cytoplasm (GO:0005737);; Biological Process: regulation of mitotic cell cycle (GO:0007346);; Biological Process: chloroplast organization (GO:0009658);; Cellular Component: integral component of membrane (GO:0016021);; Biological Process: signal transducti…	K20716|1.3e-61|mus:104001041|K20716 mitogen-activated protein kinase kinase kinase 17/18 | (RefSeq) mitogen-activated protein kinase kinase kinase 3-like	MAPK signaling pathway - plant (ko04016)	[T]	Signal transduction mechanisms	Protein kinase domain	Mitogen-activated protein kinase kinase kinase 18 OS=Arabidopsis thaliana OX=3702 GN=MAPKKK18 PE=1 SV=1	T	Signal transduction mechanisms	PREDICTED: mitogen-activated protein kinase kinase kinase NPK1 [Prunus mume]	biological process: metabolic process (GO:0008152);; biological process: cellular process (GO:0009987);; molecular function: catalytic activity (GO:0003824);; molecular function: binding (GO:0005488);; cellular component: cell (GO:0005623);; cellular component: cell part (GO:0044464);; biological process: biological regulation (GO:0065007);; biological process: cellular component organization or …
PaF106G0800032487.01	PaF106G0800032487.01	15.4305	2628	15.8986	2565	17.1638	3214	0.93168	182	1.02087	168	0.63051	108	6.75962e-188	4.11077	up	up	up	up	4.52637e-191	up	6.75962e-188	4.11077	up	[R]	General function prediction only	Biological Process: signal transduction (GO:0007165);; Molecular Function: ADP binding (GO:0043531);;	K00695|2.4e-101|mtr:MTR_6g478030|K00695 sucrose synthase [EC:2.4.1.13] | (RefSeq) sucrose synthase	Starch and sucrose metabolism (ko00500)	--	--	TIR domain	Disease resistance protein Roq1 OS=Nicotiana benthamiana OX=4100 GN=ROQ1 PE=1 SV=1	S	Function unknown	PREDICTED: TMV resistance protein N-like isoform X2 [Prunus mume]	biological process: cellular process (GO:0009987);; biological process: biological regulation (GO:0065007);; molecular function: binding (GO:0005488)
PaF106G0300012306.01	PaF106G0300012306.01	0.810251	52	0.477924	29	0.742703	52	2.40437	168	2.21768	130	1.72499	117	1.66263e-06	-1.32511	down	down	down	down	2.55123e-07	down	1.66263e-06	-1.32511	down	--	--	Molecular Function: UDP-glycosyltransferase activity (GO:0008194);; Cellular Component: intracellular membrane-bounded organelle (GO:0043231);; Molecular Function: quercetin 3-O-glucosyltransferase activity (GO:0080043);; Molecular Function: quercetin 7-O-glucosyltransferase activity (GO:0080044);;	K22706|5.0e-170|pper:18788923|K22706 (R)-mandelonitrile beta-glucosyltransferase [EC:2.4.1.354] | (RefSeq) 7-deoxyloganetin glucosyltransferase	Cyanoamino acid metabolism (ko00460)	[GC]	Carbohydrate transport and metabolism;; Energy production and conversion	UDP-glucoronosyl and UDP-glucosyl transferase	7-deoxyloganetin glucosyltransferase OS=Gardenia jasminoides OX=114476 GN=UGT85A24 PE=1 SV=1	--	--	PREDICTED: 7-deoxyloganetin glucosyltransferase-like [Prunus mume]	molecular function: catalytic activity (GO:0003824);; cellular component: cell (GO:0005623);; cellular component: organelle (GO:0043226);; cellular component: cell part (GO:0044464)
PaF106G0200008745.01	PaF106G0200008745.01	2.35479	178	3.16142	222	3.08505	253	31.3637	2567	23.3459	1597	23.7343	1884	1.23331e-98	-2.99056	down	down	down	down	3.87513e-101	down	1.23331e-98	-2.99056	down	[QV]	Secondary metabolites biosynthesis, transport and catabolism;; Defense mechanisms	Molecular Function: iron ion binding (GO:0005506);; Cellular Component: integral component of membrane (GO:0016021);; Molecular Function: oxidoreductase activity, acting on paired donors, with incorporation or reduction of molecular oxygen (GO:0016705);; Molecular Function: heme binding (GO:0020037);;	K20495|2.5e-116|ppp:112291140|K20495 long-chain fatty acid omega-monooxygenase [EC:1.14.14.80] | (RefSeq) cytochrome P450 704B1-like	Fatty acid degradation (ko00071);; Cutin, suberine and wax biosynthesis (ko00073)	[QI]	Secondary metabolites biosynthesis, transport and catabolism;; Lipid transport and metabolism	Cytochrome P450	Cytochrome P450 704C1 OS=Pinus taeda OX=3352 GN=CYP704C1 PE=2 SV=1	--	--	PREDICTED: cytochrome P450 704C1-like [Prunus mume]	molecular function: binding (GO:0005488);; cellular component: membrane (GO:0016020);; cellular component: membrane part (GO:0044425);; biological process: metabolic process (GO:0008152);; biological process: single-organism process (GO:0044699);; molecular function: catalytic activity (GO:0003824)
PaF106G0300013414.01	PaF106G0300013414.01	19.3263	1379	19.2021	1277	16.7092	1296	10.274	798	9.20941	598	7.85738	592	1.04154e-16	1.05888	up	up	up	up	4.96788e-18	up	1.04154e-16	1.05888	up	--	--	Molecular Function: molecular_function (GO:0003674);; Molecular Function: nucleic acid binding (GO:0003676);; Molecular Function: RNA binding (GO:0003723);; Molecular Function: catalytic activity (GO:0003824);; Molecular Function: nuclease activity (GO:0004518);; Molecular Function: endonuclease activity (GO:0004519);; Molecular Function: binding (GO:0005488);; Cellular Component: cellular_compon…	K20093|4.3e-07|ccav:112529065|K20093 DNA excision repair protein ERCC-6-like [EC:3.6.4.12] | (RefSeq) protein CHROMATIN REMODELING 24-like	--	[R]	General function prediction only	PPR repeat family	Pentatricopeptide repeat-containing protein At3g04130, mitochondrial OS=Arabidopsis thaliana OX=3702 GN=At3g04130 PE=2 SV=2	S	Function unknown	unnamed protein product [Prunus armeniaca]	molecular function: binding (GO:0005488);; molecular function: catalytic activity (GO:0003824);; biological process: metabolic process (GO:0008152);; biological process: cellular process (GO:0009987);; cellular component: cell (GO:0005623);; cellular component: cell part (GO:0044464);; cellular component: organelle (GO:0043226)
PaF106G0300013592.01	PaF106G0300013592.01	5.4188	320	6.51287	358	6.83819	438	1.47886	95	2.07826	112	1.03642	65	8.42129e-19	1.91314	up	up	up	up	3.45718e-20	up	8.42129e-19	1.91314	up	[M]	Cell wall/membrane/envelope biogenesis	Molecular Function: protein serine/threonine kinase activity (GO:0004674);; Molecular Function: ATP binding (GO:0005524);; Cellular Component: integral component of membrane (GO:0016021);;	K13416|2.5e-51|lsv:111899011|K13416 brassinosteroid insensitive 1-associated receptor kinase 1 [EC:2.7.10.1 2.7.11.1] | (RefSeq) BRASSINOSTEROID INSENSITIVE 1-associated receptor kinase 1-like isoform X1	MAPK signaling pathway - plant (ko04016);; Plant hormone signal transduction (ko04075);; Plant-pathogen interaction (ko04626)	[T]	Signal transduction mechanisms	Protein kinase domain	LEAF RUST 10 DISEASE-RESISTANCE LOCUS RECEPTOR-LIKE PROTEIN KINASE-like 2.2 OS=Arabidopsis thaliana OX=3702 GN=LRK10L-2.2 PE=3 SV=2	T	Signal transduction mechanisms	LEAF RUST 10 DISEASE-RESISTANCE LOCUS RECEPTOR-LIKE PROTEIN KINASE-like 2.2 [Prunus dulcis]	biological process: metabolic process (GO:0008152);; biological process: cellular process (GO:0009987);; molecular function: catalytic activity (GO:0003824);; molecular function: binding (GO:0005488);; cellular component: membrane (GO:0016020);; cellular component: membrane part (GO:0044425)
PaF106G0200008741.01	PaF106G0200008741.01	0.676948	54	0.52136	39	0.904613	79	0.252332	22	0.295993	22	0.066447	6	0.00132404	1.21148	up	up	up	up	0.000376123	up	0.00132404	1.21148	up	[QV]	Secondary metabolites biosynthesis, transport and catabolism;; Defense mechanisms	Molecular Function: monooxygenase activity (GO:0004497);; Molecular Function: iron ion binding (GO:0005506);; Cellular Component: integral component of membrane (GO:0016021);; Molecular Function: oxidoreductase activity, acting on paired donors, with incorporation or reduction of molecular oxygen (GO:0016705);; Molecular Function: heme binding (GO:0020037);;	K20495|5.8e-90|ppp:112291140|K20495 long-chain fatty acid omega-monooxygenase [EC:1.14.14.80] | (RefSeq) cytochrome P450 704B1-like	Fatty acid degradation (ko00071);; Cutin, suberine and wax biosynthesis (ko00073)	[QI]	Secondary metabolites biosynthesis, transport and catabolism;; Lipid transport and metabolism	Cytochrome P450	Cytochrome P450 704C1 OS=Pinus taeda OX=3352 GN=CYP704C1 PE=2 SV=1	Q	Secondary metabolites biosynthesis, transport and catabolism	unnamed protein product [Prunus armeniaca]	biological process: metabolic process (GO:0008152);; biological process: single-organism process (GO:0044699);; molecular function: catalytic activity (GO:0003824);; molecular function: binding (GO:0005488);; cellular component: membrane (GO:0016020);; cellular component: membrane part (GO:0044425)
PaF106G0800030312.01	PaF106G0800030312.01	3.52034	467	2.67298	331	2.49441	360	0.633271	92	0.617854	75	0.569736	81	4.20526e-26	2.13384	up	up	up	up	1.12637e-27	up	4.20526e-26	2.13384	up	--	--	Biological Process: meiotic cell cycle (GO:0051321);;	--	--	--	--	Meiosis protein SPO22/ZIP4 like	TPR repeat-containing protein ZIP4 OS=Arabidopsis thaliana OX=3702 GN=ZIP4 PE=2 SV=1	S	Function unknown	unnamed protein product [Prunus armeniaca]	biological process: reproduction (GO:0000003);; biological process: cellular process (GO:0009987);; biological process: reproductive process (GO:0022414);; biological process: single-organism process (GO:0044699)
PaF106G0400016680.01	PaF106G0400016680.01	0.802267	85	0.872998	87	0.80529	94	0.148209	18	0.150681	15	0.082443	10	2.1757e-11	2.10288	up	up	up	up	1.65413e-12	up	2.1757e-11	2.10288	up	--	--	Molecular Function: protein serine/threonine kinase activity (GO:0004674);; Molecular Function: ATP binding (GO:0005524);; Cellular Component: integral component of membrane (GO:0016021);; Molecular Function: carbohydrate binding (GO:0030246);;	--	--	--	--	D-mannose binding lectin	G-type lectin S-receptor-like serine/threonine-protein kinase At1g67520 OS=Arabidopsis thaliana OX=3702 GN=At1g67520 PE=2 SV=3	T	Signal transduction mechanisms	PREDICTED: G-type lectin S-receptor-like serine/threonine-protein kinase At1g67520 isoform X2 [Prunus mume]	biological process: metabolic process (GO:0008152);; biological process: cellular process (GO:0009987);; molecular function: catalytic activity (GO:0003824);; molecular function: binding (GO:0005488);; cellular component: membrane (GO:0016020);; cellular component: membrane part (GO:0044425)
PaF106G0400016558.01	PaF106G0400016558.01	0	0	0	0	0.011943	2	0.964673	124	1.23224	113	0.959965	105	4.74414e-29	-3.84572	down	down	down	down	1.04345e-30	down	4.74414e-29	-3.84572	down	--		Molecular Function: protein serine/threonine kinase activity (GO:0004674);; Molecular Function: ATP binding (GO:0005524);; Cellular Component: integral component of membrane (GO:0016021);; Molecular Function: carbohydrate binding (GO:0030246);; Biological Process: recognition of pollen (GO:0048544);;	K24104|2.8e-77|thj:104799061|K24104 GPN-loop GTPase | (RefSeq) LOW QUALITY PROTEIN: uncharacterized protein LOC104799061	--	--	--	Protein tyrosine and serine/threonine kinase	G-type lectin S-receptor-like serine/threonine-protein kinase At4g27290 OS=Arabidopsis thaliana OX=3702 GN=At4g27290 PE=3 SV=4	T	Signal transduction mechanisms	G-type lectin S-receptor-like serine/threonine-protein kinase At4g27290 isoform X2 [Prunus persica]	biological process: metabolic process (GO:0008152);; biological process: cellular process (GO:0009987);; molecular function: catalytic activity (GO:0003824);; molecular function: binding (GO:0005488);; cellular component: membrane (GO:0016020);; cellular component: membrane part (GO:0044425);; biological process: reproduction (GO:0000003);; biological process: reproductive process (GO:0022414);; …
PaF106G0100004135.01	PaF106G0100004135.01	6.93226	251	6.26297	211	7.88624	310	20.0641	788	19.5639	642	19.1205	728	5.29131e-24	-1.35427	down	down	down	down	1.56444e-25	down	5.29131e-24	-1.35427	down	--	--	Molecular Function: DNA binding (GO:0003677);; Cellular Component: nucleus (GO:0005634);;	K11296|8.8e-93|pmum:103321110|K11296 high mobility group protein B3 | (RefSeq) high mobility group B protein 7-like	--	[R]	General function prediction only	HMG (high mobility group) box	High mobility group B protein 7 OS=Arabidopsis thaliana OX=3702 GN=HMGB7 PE=1 SV=1	K	Transcription	high mobility group B protein 7-like isoform X2 [Prunus avium]	molecular function: binding (GO:0005488);; cellular component: cell (GO:0005623);; cellular component: organelle (GO:0043226);; cellular component: cell part (GO:0044464)
PaF106G0600025205.01	PaF106G0600025205.01	13.1879	702	12.4372	617	12.5694	727	3.05351	177	3.43301	167	2.18666	123	1.6521e-38	2.10339	up	up	up	up	2.47637e-40	up	1.6521e-38	2.10339	up	--	--	Cellular Component: integral component of membrane (GO:0016021);; Molecular Function: protein dimerization activity (GO:0046983);;	--	--	--	--	--	--	K	Transcription	transcription factor ABORTED MICROSPORES [Prunus yedoensis var. nudiflora]	cellular component: membrane (GO:0016020);; cellular component: membrane part (GO:0044425);; molecular function: binding (GO:0005488)
PaF106G0700027870.01	PaF106G0700027870.01	6.13969	482	7.6325	561	11.9036	1001	1.73034	145	1.80765	131	1.68958	138	1.02729e-27	2.17764	up	up	up	up	2.43937e-29	up	1.02729e-27	2.17764	up	[G]	Carbohydrate transport and metabolism	Molecular Function: hydrolase activity, hydrolyzing O-glycosyl compounds (GO:0004553);; Biological Process: carbohydrate metabolic process (GO:0005975);;	K13031|1.2e-158|pper:18770931|K13031 amygdalin beta-glucosidase [EC:3.2.1.117] | (RefSeq) beta-glucosidase 12 isoform X1	Cyanoamino acid metabolism (ko00460)	[G]	Carbohydrate transport and metabolism	Glycosyl hydrolase family 1	Cyanogenic beta-glucosidase (Fragment) OS=Trifolium repens OX=3899 GN=LI PE=1 SV=1	G	Carbohydrate transport and metabolism	cyanogenic beta-glucosidase isoform X2 [Prunus persica]	molecular function: catalytic activity (GO:0003824);; biological process: metabolic process (GO:0008152)
PaF106G0700027288.01	PaF106G0700027288.01	12.936	670	13.7627	665	11.8932	670	5.93155	335	6.25064	295	4.5822	251	3.77032e-16	1.22578	up	up	up	up	1.8605e-17	up	3.77032e-16	1.22578	up	--	--	Cellular Component: nucleus (GO:0005634);; Cellular Component: plasma membrane (GO:0005886);; Biological Process: negative regulation of transcription, DNA-templated (GO:0045892);;	K01870|2.6e-11|smo:SELMODRAFT_437676|K01870 isoleucyl-tRNA synthetase [EC:6.1.1.5] | (RefSeq) hypothetical protein	Aminoacyl-tRNA biosynthesis (ko00970)	--	--	Transcriptional repressor, ovate	Transcription repressor OFP7 OS=Arabidopsis thaliana OX=3702 GN=OFP7 PE=2 SV=1	S	Function unknown	unnamed protein product [Prunus armeniaca]	cellular component: cell (GO:0005623);; cellular component: organelle (GO:0043226);; cellular component: cell part (GO:0044464);; cellular component: membrane (GO:0016020);; biological process: biological regulation (GO:0065007)
PaF106G0600022161.01	PaF106G0600022161.01	0.397867	24	0.265695	15	0.391986	26	7.39084	478	4.91579	266	7.55891	474	2.10075e-48	-3.57829	down	down	down	down	2.16416e-50	down	2.10075e-48	-3.57829	down	[G]	Carbohydrate transport and metabolism	Molecular Function: UDP-glycosyltransferase activity (GO:0008194);; Cellular Component: intracellular membrane-bounded organelle (GO:0043231);; Molecular Function: quercetin 3-O-glucosyltransferase activity (GO:0080043);; Molecular Function: quercetin 7-O-glucosyltransferase activity (GO:0080044);;	K13493|1.7e-108|eus:EUTSA_v10013500mg|K13493 cytokinin-N-glucosyltransferase [EC:2.4.1.-] | (RefSeq) hypothetical protein	Zeatin biosynthesis (ko00908)	[GC]	Carbohydrate transport and metabolism;; Energy production and conversion	UDP-glucoronosyl and UDP-glucosyl transferase	UDP-glucose iridoid glucosyltransferase OS=Catharanthus roseus OX=4058 GN=UGT76A2 PE=1 SV=1	--	--	unnamed protein product [Prunus armeniaca]	molecular function: catalytic activity (GO:0003824);; cellular component: cell (GO:0005623);; cellular component: organelle (GO:0043226);; cellular component: cell part (GO:0044464)
PaF106G0800031008.01	PaF106G0800031008.01	0.258635	17	0.068248	4	0.123704	9	1.57712	108	1.28955	74	0.987997	66	1.07979e-08	-2.01403	down	down	down	down	1.15409e-09	down	1.07979e-08	-2.01403	down	[G]	Carbohydrate transport and metabolism	Molecular Function: UDP-glycosyltransferase activity (GO:0008194);;	K23260|7.6e-264|pper:18768382|K23260 scopoletin glucosyltransferase [EC:2.4.1.128] | (RefSeq) UDP-glucose flavonoid 3-O-glucosyltransferase 7	Phenylpropanoid biosynthesis (ko00940)	[GC]	Carbohydrate transport and metabolism;; Energy production and conversion	UDP-glucoronosyl and UDP-glucosyl transferase	UDP-glucose flavonoid 3-O-glucosyltransferase 7 OS=Fragaria ananassa OX=3747 GN=GT7 PE=1 SV=1	--	--	PREDICTED: scopoletin glucosyltransferase [Prunus dulcis]	molecular function: catalytic activity (GO:0003824)
PaF106G0600025012.01	PaF106G0600025012.01	32.0906	657	35.2892	674	25.0776	558	79.1945	1764	72.7588	1354	76.3702	1649	7.00712e-18	-1.18552	down	down	down	down	3.04987e-19	down	7.00712e-18	-1.18552	down	--	--	Biological Process: lipid transport (GO:0006869);; Molecular Function: lipid binding (GO:0008289);;	--	--	--	--	Protease inhibitor/seed storage/LTP family	Non-specific lipid-transfer protein 1 OS=Prunus dulcis OX=3755 PE=3 SV=1	--	--	non-specific lipid-transfer protein-like [Prunus avium]	biological process: single-organism process (GO:0044699);; biological process: localization (GO:0051179);; molecular function: binding (GO:0005488)
PaF106G0500018586.01	PaF106G0500018586.01	2.08782	62	3.30594	91	4.29592	137	0.422549	14	0.497751	14	0.317879	10	1.30221e-11	2.21938	up	up	up	up	9.67904e-13	up	1.30221e-11	2.21938	up	--	--	Cellular Component: integral component of membrane (GO:0016021);;	K01537|8.4e-40|pavi:110773092|K01537 P-type Ca2+ transporter type 2C [EC:7.2.2.10] | (RefSeq) putative calcium-transporting ATPase 11, plasma membrane-type isoform X1	--	--	--	--	--	S	Function unknown	PREDICTED: uncharacterized protein LOC103343208 isoform X2 [Prunus mume]	cellular component: membrane (GO:0016020);; cellular component: membrane part (GO:0044425)
PaF106G0600023537.01	PaF106G0600023537.01	0.533773	39	0.448553	31	0.560707	44	1.4757	116	1.78999	117	1.67889	128	5.50135e-07	-1.35707	down	down	down	down	7.74735e-08	down	5.50135e-07	-1.35707	down	--	--	Molecular Function: chromatin binding (GO:0003682);; Cellular Component: nucleus (GO:0005634);;	--	--	--	--	--	TSL-kinase interacting protein 1 OS=Arabidopsis thaliana OX=3702 GN=TKI1 PE=1 SV=2	S	Function unknown	unnamed protein product [Prunus armeniaca]	molecular function: binding (GO:0005488);; cellular component: cell (GO:0005623);; cellular component: organelle (GO:0043226);; cellular component: cell part (GO:0044464)
PaF106G0100000829.01	PaF106G0100000829.01	1.19671	70	1.05729	58	1.02354	65	0	0	0	0	0	0	1.70426e-19	3.29767	up	up	up	up	6.7068e-21	up	1.70426e-19	3.29767	up	--	--	Molecular Function: nucleic acid binding (GO:0003676);; Biological Process: DNA integration (GO:0015074);; Molecular Function: kinase activity (GO:0016301);;	K03515|4.0e-54|ghi:107894697|K03515 DNA repair protein REV1 [EC:2.7.7.-] | (RefSeq) uncharacterized protein LOC107894697	--	[R]	General function prediction only	GAG-pre-integrase domain	Retrovirus-related Pol polyprotein from transposon RE2 OS=Arabidopsis thaliana OX=3702 GN=RE2 PE=4 SV=1	L	Replication, recombination and repair	wall-associated kinase 2 [Prunus dulcis]	molecular function: binding (GO:0005488);; biological process: metabolic process (GO:0008152);; biological process: cellular process (GO:0009987);; molecular function: catalytic activity (GO:0003824)
PaF106G0300012373.01	PaF106G0300012373.01	3.23118	223	5.988	385	3.41289	256	0.988925	75	0.976324	62	0.929159	68	1.03142e-14	1.91521	up	up	up	up	5.71653e-16	up	1.03142e-14	1.91521	up	--	--	--	--	--	--	--	--	--	--	--	hypothetical protein HanXRQr2_Chr03g0135661 [Helianthus annuus]	--
PaF106G0200010540.01	PaF106G0200010540.01	0.122113	12	0.232182	21	0.205865	21	2.99745	305	2.79503	238	3.17306	313	5.97056e-43	-3.37127	down	down	down	down	7.44244e-45	down	5.97056e-43	-3.37127	down	--	--	Molecular Function: antiporter activity (GO:0015297);; Cellular Component: integral component of membrane (GO:0016021);; Molecular Function: xenobiotic transporter activity (GO:0042910);;	K03327|9.1e-101|pavi:110767637|K03327 multidrug resistance protein, MATE family | (RefSeq) protein DETOXIFICATION 35-like	--	[R]	General function prediction only	MatE	Protein DETOXIFICATION 35 OS=Arabidopsis thaliana OX=3702 GN=DTX35 PE=1 SV=1	V	Defense mechanisms	PREDICTED: DETOXIFICATION [Prunus dulcis]	biological process: localization (GO:0051179);; molecular function: transporter activity (GO:0005215);; cellular component: membrane (GO:0016020);; cellular component: membrane part (GO:0044425)
PaF106G0700027134.01	PaF106G0700027134.01	10.4713	335	11.4594	342	10.6474	371	2.73556	96	2.23544	66	2.8079	95	5.23621e-27	1.98395	up	up	up	up	1.30002e-28	up	5.23621e-27	1.98395	up	--	--	Biological Process: response to auxin (GO:0009733);;	K14488|9.6e-58|pper:18769935|K14488 SAUR family protein | (RefSeq) auxin-responsive protein SAUR50	Plant hormone signal transduction (ko04075)	--	--	Auxin responsive protein	Auxin-responsive protein SAUR50 OS=Arabidopsis thaliana OX=3702 GN=SAUR50 PE=1 SV=1	S	Function unknown	auxin-responsive protein SAUR50 [Prunus persica]	biological process: response to stimulus (GO:0050896)
PaF106G0200008873.01	PaF106G0200008873.01	0.947446	42	1.27504	52	2.47902	92	1.65058	74	6.60224	231	7.15995	294	0.000441728	-1.22392	down	down	down	down	0.000111718	down	0.000441728	-1.22392	down	--	--	Molecular Function: acyl-CoA hydrolase activity (GO:0047617);;	K17362|1.1e-44|pmum:103331862|K17362 acyl-coenzyme A thioesterase 13 [EC:3.1.2.-] | (RefSeq) acyl-coenzyme A thioesterase 13	--	--	--	--	--	Q	Secondary metabolites biosynthesis, transport and catabolism	unnamed protein product [Prunus armeniaca]	molecular function: catalytic activity (GO:0003824)
Prunus_sibirica_newGene_2093	--	1.76645	244	1.41547	174	1.70684	256	8.1495	1212	11.4736	1379	5.82224	834	2.01429e-28	-2.11589	down	down	down	down	4.55483e-30	down	2.01429e-28	-2.11589	down	--	--	Molecular Function: nucleic acid binding (GO:0003676);; Biological Process: gene silencing by RNA (GO:0031047);;	K11593|0.0e+00|pmum:103330930|K11593 eukaryotic translation initiation factor 2C | (RefSeq) protein argonaute 4A-like	--	[J]	Translation, ribosomal structure and biogenesis	Piwi domain	Protein argonaute 4A OS=Oryza sativa subsp. japonica OX=39947 GN=AGO4A PE=2 SV=1	J	Translation, ribosomal structure and biogenesis	PREDICTED: protein argonaute 4A-like [Prunus mume]	molecular function: binding (GO:0005488);; biological process: cellular process (GO:0009987);; biological process: single-organism process (GO:0044699);; biological process: biological regulation (GO:0065007)
PaF106G0600024203.01	PaF106G0600024203.01	24.62	3168	27.866	3343	30.4266	4256	12.0119	1682	12.3431	1445	12.1149	1645	6.89569e-46	1.23803	up	up	up	up	7.92077e-48	up	6.89569e-46	1.23803	up	--	--	Biological Process: reproduction (GO:0000003);; Biological Process: developmental process involved in reproduction (GO:0003006);; Molecular Function: protein binding (GO:0005515);; Cellular Component: cellular_component (GO:0005575);; Cellular Component: cell (GO:0005623);; Biological Process: multicellular organism development (GO:0007275);; Biological Process: biological_process (GO:0008150);; …	--	--	--	--	NPH3 family	BTB/POZ domain-containing protein NPY2 OS=Arabidopsis thaliana OX=3702 GN=NPY2 PE=2 SV=1	S	Function unknown	unnamed protein product [Prunus armeniaca]	biological process: reproduction (GO:0000003);; biological process: reproductive process (GO:0022414);; biological process: developmental process (GO:0032502);; molecular function: binding (GO:0005488);; cellular component: cell (GO:0005623);; biological process: multicellular organismal process (GO:0032501);; biological process: single-organism process (GO:0044699);; biological process: response…
PaF106G0200007167.01	PaF106G0200007167.01	0	0	0	0	0	0	14.6036	154	11.8353	105	10.4255	107	1.14275e-31	-4.05461	down	down	down	down	2.225e-33	down	1.14275e-31	-4.05461	down	--	--	Molecular Function: DNA binding (GO:0003677);; Cellular Component: nucleus (GO:0005634);; Biological Process: regulation of transcription, DNA-templated (GO:0006355);; Biological Process: response to hormone (GO:0009725);;	K14486|5.3e-06|bdi:100824752|K14486 auxin response factor | (RefSeq) auxin response factor 11 isoform X1	Plant hormone signal transduction (ko04075)	--	--	Auxin response factor	Auxin response factor 22 OS=Oryza sativa subsp. japonica OX=39947 GN=ARF22 PE=2 SV=1	K	Transcription	PREDICTED: auxin response factor [Prunus dulcis]	molecular function: binding (GO:0005488);; cellular component: cell (GO:0005623);; cellular component: organelle (GO:0043226);; cellular component: cell part (GO:0044464);; biological process: biological regulation (GO:0065007);; biological process: response to stimulus (GO:0050896)
PaF106G0100004475.01	PaF106G0100004475.01	0.496273	33	0.663772	41	1.32956	94	9.97538	698	9.30126	539	7.05365	480	5.33458e-35	-2.91019	down	down	down	down	9.12269e-37	down	5.33458e-35	-2.91019	down	--	--	Molecular Function: DNA binding (GO:0003677);; Cellular Component: nucleus (GO:0005634);;	K15777|8.2e-45|mesc:110630336|K15777 4,5-DOPA dioxygenase extradiol [EC:1.13.11.-] | (RefSeq) uncharacterized protein LOC110630336	Betalain biosynthesis (ko00965)	--	--	ZF-HD protein dimerisation region	Zinc-finger homeodomain protein 6 OS=Arabidopsis thaliana OX=3702 GN=ZHD6 PE=1 SV=1	K	Transcription	unnamed protein product [Prunus armeniaca]	molecular function: binding (GO:0005488);; cellular component: cell (GO:0005623);; cellular component: organelle (GO:0043226);; cellular component: cell part (GO:0044464)
PaF106G0400014797.01	PaF106G0400014797.01	2.76246	201	3.90489	265	2.79103	221	0.736672	59	0.786477	53	0.680913	53	8.06844e-17	1.92609	up	up	up	up	3.79442e-18	up	8.06844e-17	1.92609	up	[E]	Amino acid transport and metabolism	Biological Process: amino acid transport (GO:0006865);; Cellular Component: integral component of membrane (GO:0016021);; Molecular Function: transmembrane transporter activity (GO:0022857);;	K19564|1.2e-49|qsu:111984493|K19564 choline transport protein | (RefSeq) choline transport protein-like	--	[E]	Amino acid transport and metabolism	Amino acid permease	Amino-acid permease BAT1 OS=Arabidopsis thaliana OX=3702 GN=BAT1 PE=2 SV=2	E	Amino acid transport and metabolism	unnamed protein product [Prunus armeniaca]	biological process: single-organism process (GO:0044699);; biological process: localization (GO:0051179);; cellular component: membrane (GO:0016020);; cellular component: membrane part (GO:0044425);; molecular function: transporter activity (GO:0005215)
PaF106G0300014317.01	PaF106G0300014317.01	1.86295	187	2.6021	244	2.42294	264	0.790599	87	1.10251	101	1.05086	112	1.50519e-07	1.17163	up	up	up	up	1.92898e-08	up	1.50519e-07	1.17163	up	--	--	Cellular Component: integral component of membrane (GO:0016021);;	K13466|1.6e-09|vvi:100246778|K13466 EIX receptor 1/2 | (RefSeq) receptor-like protein 12	Plant-pathogen interaction (ko04626)	--	--	Leucine rich repeat	Tyrosine-sulfated glycopeptide receptor 1 OS=Arabidopsis thaliana OX=3702 GN=PSY1R PE=1 SV=1	T	Signal transduction mechanisms	receptor-like protein 2 [Prunus persica]	cellular component: membrane (GO:0016020);; cellular component: membrane part (GO:0044425)
PaF106G0400015254.01	PaF106G0400015254.01	4.11356	260	3.51244	207	4.65586	320	16.052	1103	16.5054	948	15.9486	1062	2.32708e-47	-1.84597	down	down	down	down	2.5052e-49	down	2.32708e-47	-1.84597	down	[Q]	Secondary metabolites biosynthesis, transport and catabolism	Molecular Function: metal ion binding (GO:0046872);; Molecular Function: dioxygenase activity (GO:0051213);;	K14975|1.3e-58|psom:113311621|K14975 codeine 3-O-demethylase [EC:1.14.11.32] | (RefSeq) codeine O-demethylase	Isoquinoline alkaloid biosynthesis (ko00950)	[QR]	Secondary metabolites biosynthesis, transport and catabolism;; General function prediction only	non-haem dioxygenase in morphine synthesis N-terminal	2-oxoglutarate-dependent dioxygenase 11 OS=Oryza sativa subsp. japonica OX=39947 GN=2ODD11 PE=1 SV=1	Q	Secondary metabolites biosynthesis, transport and catabolism	unnamed protein product [Prunus armeniaca]	molecular function: binding (GO:0005488);; biological process: metabolic process (GO:0008152);; biological process: single-organism process (GO:0044699);; molecular function: catalytic activity (GO:0003824)
PaF106G0100001985.01	PaF106G0100001985.01	1.22788	125	1.74586	166	1.33636	148	0.42864	48	0.516514	48	0.428718	46	6.92503e-09	1.49479	up	up	up	up	7.18685e-10	up	6.92503e-09	1.49479	up	--	--	--	K20535|2.3e-06|nta:107797610|K20535 mitogen-activated protein kinase 1/2 [EC:2.7.11.24] | (RefSeq) mitogen-activated protein kinase KSS1-like	MAPK signaling pathway - plant (ko04016)	--	--	Myb/SANT-like DNA-binding domain	--	S	Function unknown	hypothetical protein PRUPE_1G245200 [Prunus persica]	--
PaF106G0800031767.01	PaF106G0800031767.01	87.3709	6428	80.8086	5543	71.0664	5684	36.0299	2885	37.798	2529	39.6546	3079	1.97974e-26	1.12784	up	up	up	up	5.13952e-28	up	1.97974e-26	1.12784	up	--	--	Molecular Function: Rab GDP-dissociation inhibitor activity (GO:0005093);; Cellular Component: cytoplasm (GO:0005737);; Biological Process: small GTPase mediated signal transduction (GO:0007264);; Biological Process: protein transport (GO:0015031);; Biological Process: vesicle-mediated transport (GO:0016192);; Molecular Function: Rab GTPase binding (GO:0017137);; Cellular Component: apoplast (GO:…	K17255|2.8e-260|pmum:103335884|K17255 Rab GDP dissociation inhibitor | (RefSeq) guanosine nucleotide diphosphate dissociation inhibitor At5g09550	--	[O]	Posttranslational modification, protein turnover, chaperones	GDP dissociation inhibitor	Guanosine nucleotide diphosphate dissociation inhibitor At5g09550 OS=Arabidopsis thaliana OX=3702 GN=At5g09550 PE=3 SV=1	O	Posttranslational modification, protein turnover, chaperones	unnamed protein product [Prunus armeniaca]	biological process: biological regulation (GO:0065007);; molecular function: molecular function regulator (GO:0098772);; cellular component: cell (GO:0005623);; cellular component: cell part (GO:0044464);; biological process: cellular process (GO:0009987);; biological process: signaling (GO:0023052);; biological process: single-organism process (GO:0044699);; biological process: response to stimu…
PaF106G0200007569.01	PaF106G0200007569.01	0.836246	260	0.513011	149	0.770295	260	11.6656	3924	16.5562	4653	15.6602	5091	3.97192e-146	-4.07214	down	down	down	down	4.91018e-149	down	3.97192e-146	-4.07214	down	--	--	Biological Process: signal transduction (GO:0007165);; Molecular Function: ADP binding (GO:0043531);;	K00695|2.6e-155|mtr:MTR_6g478030|K00695 sucrose synthase [EC:2.4.1.13] | (RefSeq) sucrose synthase	Starch and sucrose metabolism (ko00500)	--	--	TIR domain	TMV resistance protein N OS=Nicotiana glutinosa OX=35889 GN=N PE=1 SV=1	T	Signal transduction mechanisms	PREDICTED: TMV resistance [Prunus dulcis]	biological process: cellular process (GO:0009987);; biological process: biological regulation (GO:0065007);; molecular function: binding (GO:0005488)
PaF106G0100001851.01	PaF106G0100001851.01	0.3386	72	0.441559	87	0.555752	127	6.96564	1590	7.18706	1371	7.0503	1560	3.28977e-155	-3.7493	down	down	down	down	3.38907e-158	down	3.28977e-155	-3.7493	down	--	--	Biological Process: defense response (GO:0006952);; Molecular Function: ADP binding (GO:0043531);;	K15078|2.2e-117|tcc:18614561|K15078 structure-specific endonuclease subunit SLX1 [EC:3.6.1.-] | (RefSeq) putative disease resistance protein RGA3	--	[T]	Signal transduction mechanisms	NB-ARC domain	Putative disease resistance protein RGA3 OS=Solanum bulbocastanum OX=147425 GN=RGA3 PE=2 SV=2	T	Signal transduction mechanisms	disease resistance protein RGA2 [Prunus persica]	biological process: response to stimulus (GO:0050896);; molecular function: binding (GO:0005488)
PaF106G0500020797.01	PaF106G0500020797.01	0	0	0	0	0	0	2.13913	119	2.06073	96	1.1806	64	3.0987e-23	-3.56826	down	down	down	down	9.81611e-25	down	3.0987e-23	-3.56826	down	--	--	Molecular Function: DNA binding (GO:0003677);; Cellular Component: nucleus (GO:0005634);;	K09422|7.8e-191|pmum:103338486|K09422 transcription factor MYB, plant | (RefSeq) myb-related protein Hv1-like	--	[K]	Transcription	Myb-like DNA-binding domain	Transcription factor MYB106 OS=Arabidopsis thaliana OX=3702 GN=MYB106 PE=2 SV=1	--	--	unnamed protein product [Prunus armeniaca]	molecular function: binding (GO:0005488);; cellular component: cell (GO:0005623);; cellular component: organelle (GO:0043226);; cellular component: cell part (GO:0044464)
PaF106G0400015359.01	PaF106G0400015359.01	0.227314	21	0.156999	14	0.308802	31	0.799068	78	0.610901	50	1.00711	96	0.000212144	-1.2627	down	down	down	down	4.98506e-05	down	0.000212144	-1.2627	down	--		Biological Process: defense response to oomycetes (GO:0002229);; Molecular Function: transmembrane receptor protein serine/threonine kinase activity (GO:0004675);; Molecular Function: ATP binding (GO:0005524);; Cellular Component: plasma membrane (GO:0005886);; Biological Process: defense response (GO:0006952);; Molecular Function: carbohydrate binding (GO:0030246);; Biological Process: defense r…	K22133|1.3e-94|egr:104443802|K22133 oxalate---CoA ligase [EC:6.2.1.8] | (RefSeq) oxalate--CoA ligase	Glyoxylate and dicarboxylate metabolism (ko00630)	--	--	Legume lectin domain	L-type lectin-domain containing receptor kinase IX.1 OS=Arabidopsis thaliana OX=3702 GN=LECRK91 PE=1 SV=1	T	Signal transduction mechanisms	PREDICTED: L-type lectin-domain containing receptor kinase IX.1-like isoform X1 [Prunus mume]	biological process: response to stimulus (GO:0050896);; biological process: multi-organism process (GO:0051704);; biological process: metabolic process (GO:0008152);; biological process: cellular process (GO:0009987);; biological process: signaling (GO:0023052);; biological process: single-organism process (GO:0044699);; biological process: biological regulation (GO:0065007);; molecular function:…
PaF106G0300012012.01	PaF106G0300012012.01	1.33192	99	0.914351	63	1.17074	94	0.2703	22	0.259707	18	0.615114	48	0.000354889	1.22152	up	up	up	up	8.76282e-05	up	0.000354889	1.22152	up	[V]	Defense mechanisms	Molecular Function: antiporter activity (GO:0015297);; Cellular Component: integral component of membrane (GO:0016021);; Molecular Function: xenobiotic transporter activity (GO:0042910);;	K03327|1.2e-281|pmum:103329387|K03327 multidrug resistance protein, MATE family | (RefSeq) protein DETOXIFICATION 40-like	--	[R]	General function prediction only	MatE	Protein DETOXIFICATION 40 OS=Arabidopsis thaliana OX=3702 GN=DTX40 PE=1 SV=1	L	Replication, recombination and repair	PREDICTED: protein DETOXIFICATION 40-like [Prunus mume]	biological process: localization (GO:0051179);; molecular function: transporter activity (GO:0005215);; cellular component: membrane (GO:0016020);; cellular component: membrane part (GO:0044425)
Prunus_sibirica_newGene_2024	--	0.064191	6	0.021611	2	0.070336	7	1.96381	194	1.36254	111	1.34569	129	2.02914e-26	-3.4006	down	down	down	down	5.28868e-28	down	2.02914e-26	-3.4006	down	--	--	--	K12667|2.8e-16|qsu:112019243|K12667 oligosaccharyltransferase complex subunit delta (ribophorin II) | (RefSeq) dolichyl-diphosphooligosaccharide--protein glycosyltransferase subunit 2	N-Glycan biosynthesis (ko00510);; Various types of N-glycan biosynthesis (ko00513);; Protein processing in endoplasmic reticulum (ko04141)	--	--	--	--	L	Replication, recombination and repair	PREDICTED: reverse mRNAase [Prunus dulcis]	--
PaF106G0600024411.01	PaF106G0600024411.01	28.2489	1639	30.6062	1685	28.7896	1827	12.6102	783	13.7596	734	13.1831	819	3.89375e-33	1.20544	up	up	up	up	7.1802e-35	up	3.89375e-33	1.20544	up	--	--	Molecular Function: DNA binding (GO:0003677);; Cellular Component: nucleus (GO:0005634);;	--	--	[O]	Posttranslational modification, protein turnover, chaperones	--	Protein REVEILLE 8 OS=Arabidopsis thaliana OX=3702 GN=RVE8 PE=2 SV=1	K	Transcription	unnamed protein product [Prunus armeniaca]	molecular function: binding (GO:0005488);; cellular component: cell (GO:0005623);; cellular component: organelle (GO:0043226);; cellular component: cell part (GO:0044464)
PaF106G0100005998.01	PaF106G0100005998.01	0.618846	46	0.536017	37	0.387851	32	2.7965	225	2.27452	153	1.47371	115	8.33002e-09	-1.65295	down	down	down	down	8.74802e-10	down	8.33002e-09	-1.65295	down	--	--	Molecular Function: UDP-glycosyltransferase activity (GO:0008194);; Cellular Component: intracellular membrane-bounded organelle (GO:0043231);; Molecular Function: quercetin 3-O-glucosyltransferase activity (GO:0080043);; Molecular Function: quercetin 7-O-glucosyltransferase activity (GO:0080044);;	K22706|7.3e-195|pper:18788923|K22706 (R)-mandelonitrile beta-glucosyltransferase [EC:2.4.1.354] | (RefSeq) 7-deoxyloganetin glucosyltransferase	Cyanoamino acid metabolism (ko00460)	[GC]	Carbohydrate transport and metabolism;; Energy production and conversion	UDP-glucoronosyl and UDP-glucosyl transferase	7-deoxyloganetin glucosyltransferase OS=Gardenia jasminoides OX=114476 GN=UGT85A24 PE=1 SV=1	--	--	PREDICTED: 7-deoxyloganetin glucosyltransferase-like [Prunus mume]	molecular function: catalytic activity (GO:0003824);; cellular component: cell (GO:0005623);; cellular component: organelle (GO:0043226);; cellular component: cell part (GO:0044464)
PaF106G0100005449.01	PaF106G0100005449.01	0.473777	90	0.371398	66	0.317083	66	1.0031	208	0.935673	162	0.811694	163	2.37016e-05	-1.03522	down	down	down	down	4.53668e-06	down	2.37016e-05	-1.03522	down	[V]	Defense mechanisms	Molecular Function: ATP binding (GO:0005524);; Cellular Component: integral component of membrane (GO:0016021);; Molecular Function: ATPase activity (GO:0016887);;	K08712|4.2e-140|gsl:Gasu_29800|K08712 ATP-binding cassette, subfamily G (WHITE), member 2, SNQ2 | (RefSeq) ABC transporter, ATP-binding protein	ABC transporters (ko02010)	[Q]	Secondary metabolites biosynthesis, transport and catabolism	ABC-2 type transporter	Pleiotropic drug resistance protein 1 OS=Petunia hybrida OX=4102 GN=PDR1 PE=2 SV=1	Q	Secondary metabolites biosynthesis, transport and catabolism	ABC transporter G family member 39-like isoform X2 [Prunus avium]	molecular function: binding (GO:0005488);; cellular component: membrane (GO:0016020);; cellular component: membrane part (GO:0044425);; molecular function: catalytic activity (GO:0003824)
PaF106G0700029240.01	PaF106G0700029240.01	2.43995	108	1.49822	62	1.06613	51	0.07624	4	0.229108	10	0.578583	27	7.21816e-05	1.51964	up	up	up	up	1.5203e-05	up	7.21816e-05	1.51964	up	--	--	Biological Process: regulation of transcription, DNA-templated (GO:0006355);;	K11294|1.5e-08|nto:104117803|K11294 nucleolin | (RefSeq) nucleolin 2-like isoform X1	--	--	--	Protein of unknown function, DUF573	STOREKEEPER protein OS=Solanum tuberosum OX=4113 GN=STK PE=2 SV=1	S	Function unknown	STOREKEEPER protein [Prunus persica]	biological process: biological regulation (GO:0065007)
PaF106G0800031512.01	PaF106G0800031512.01	0	0	0	0	0	0	1.16112	80	1.03432	60	0.702264	47	1.79925e-16	-3.05206	down	down	down	down	8.72099e-18	down	1.79925e-16	-3.05206	down	[T]	Signal transduction mechanisms	Molecular Function: acid phosphatase activity (GO:0003993);; Molecular Function: metal ion binding (GO:0046872);;	K22390|2.9e-279|pmum:103335712|K22390 acid phosphatase type 7 | (RefSeq) purple acid phosphatase-like	--	[G]	Carbohydrate transport and metabolism	Calcineurin-like phosphoesterase	Purple acid phosphatase OS=Glycine max OX=3847 GN=PAP PE=1 SV=2	G	Carbohydrate transport and metabolism	PREDICTED: purple acid phosphatase-like [Prunus mume]	biological process: metabolic process (GO:0008152);; biological process: cellular process (GO:0009987);; molecular function: catalytic activity (GO:0003824);; molecular function: binding (GO:0005488)
PaF106G0200008836.01	PaF106G0200008836.01	0.440569	60	0.464673	59	0.539069	80	2.90739	427	2.6076	320	1.48298	212	1.76019e-15	-1.9268	down	down	down	down	9.15005e-17	down	1.76019e-15	-1.9268	down	--	--	Cellular Component: integral component of membrane (GO:0016021);;	K13466|3.3e-293|pper:18785913|K13466 EIX receptor 1/2 | (RefSeq) LRR receptor-like serine/threonine-protein kinase GSO2 isoform X1	Plant-pathogen interaction (ko04626)	--	--	Leucine rich repeat	Receptor-like protein EIX2 OS=Solanum lycopersicum OX=4081 GN=EIX2 PE=1 SV=2	P	Inorganic ion transport and metabolism	receptor-like protein EIX2 [Prunus dulcis]	cellular component: membrane (GO:0016020);; cellular component: membrane part (GO:0044425)
PaF106G0400016522.01	PaF106G0400016522.01	0.561342	44	0.705721	51	1.32285	111	0.291108	25	0.243505	18	0.338029	28	0.000948392	1.1655	up	up	up	up	0.000260131	up	0.000948392	1.1655	up	--	--	Cellular Component: membrane (GO:0016020);; Cellular Component: integral component of membrane (GO:0016021);;	K15503|3.5e-29|hbr:110673220|K15503 serine/threonine-protein phosphatase 6 regulatory ankyrin repeat subunit B | (RefSeq) uncharacterized protein LOC110673220	--	[R]	General function prediction only	Ankyrin repeats (3 copies)	Protein ACCELERATED CELL DEATH 6 OS=Arabidopsis thaliana OX=3702 GN=ACD6 PE=1 SV=1	S	Function unknown	ankyrin repeat-containing protein At5g02620 [Prunus persica]	cellular component: membrane (GO:0016020);; cellular component: membrane part (GO:0044425)
PaF106G0600022413.01	PaF106G0600022413.01	2.40058	307	1.96348	243	1.9974	295	0.960725	150	0.809788	106	1.11167	168	5.16457e-07	1.01108	up	up	up	up	7.2305e-08	up	5.16457e-07	1.01108	up	--	--	Molecular Function: protein kinase activity (GO:0004672);; Molecular Function: ATP binding (GO:0005524);; Cellular Component: integral component of membrane (GO:0016021);;	K13435|7.7e-51|spen:107018783|K13435 serine/threonine-protein kinase Pto | (RefSeq) receptor-like protein kinase HERK 1 isoform X2	Plant-pathogen interaction (ko04626)	[T]	Signal transduction mechanisms	Malectin-like domain	Receptor-like protein kinase HERK 1 OS=Arabidopsis thaliana OX=3702 GN=HERK1 PE=1 SV=1	T	Signal transduction mechanisms	unnamed protein product [Prunus armeniaca]	biological process: metabolic process (GO:0008152);; biological process: cellular process (GO:0009987);; molecular function: catalytic activity (GO:0003824);; molecular function: binding (GO:0005488);; cellular component: membrane (GO:0016020);; cellular component: membrane part (GO:0044425)
PaF106G0700026926.01	PaF106G0700026926.01	6.02971	738	6.7088	784	6.12382	832	33.6875	4578	33.7206	3864	28.4809	3795	4.34649e-128	-2.24937	down	down	down	down	8.28372e-131	down	4.34649e-128	-2.24937	down	[E]	Amino acid transport and metabolism	Cellular Component: plasma membrane (GO:0005886);; Molecular Function: ligand-gated ion channel activity (GO:0015276);; Cellular Component: integral component of membrane (GO:0016021);; Molecular Function: signaling receptor activity (GO:0038023);;	K05387|6.0e-150|pavi:110748851|K05387 glutamate receptor, ionotropic, plant | (RefSeq) glutamate receptor 3.6-like isoform X1	--	[PET]	Inorganic ion transport and metabolism;; Amino acid transport and metabolism;; Signal transduction mechanisms	Receptor family ligand binding region	Glutamate receptor 3.6 OS=Arabidopsis thaliana OX=3702 GN=GLR3.6 PE=2 SV=1	--	--	hypothetical protein PRUPE_7G184400 [Prunus persica]	cellular component: cell (GO:0005623);; cellular component: membrane (GO:0016020);; cellular component: cell part (GO:0044464);; biological process: localization (GO:0051179);; molecular function: transporter activity (GO:0005215);; molecular function: molecular transducer activity (GO:0060089);; cellular component: membrane part (GO:0044425);; biological process: cellular process (GO:0009987);; …
PaF106G0700028384.01	PaF106G0700028384.01	0.833353	50	0.725719	41	1.35934	89	12.6838	825	11.4906	625	11.7816	743	8.94867e-71	-3.28736	down	down	down	down	4.74767e-73	down	8.94867e-71	-3.28736	down	--	--	Molecular Function: DNA binding (GO:0003677);; Cellular Component: nucleus (GO:0005634);;	--	--	--	--	B3 DNA binding domain	B3 domain-containing protein REM16 OS=Arabidopsis thaliana OX=3702 GN=REM16 PE=2 SV=1	K	Transcription	unnamed protein product [Prunus armeniaca]	molecular function: binding (GO:0005488);; cellular component: cell (GO:0005623);; cellular component: organelle (GO:0043226);; cellular component: cell part (GO:0044464)
PaF106G0400016870.01	PaF106G0400016870.01	3.56072	593	3.02211	469	2.94971	534	0.980953	178	1.38324	210	1.2633	222	2.69053e-15	1.38551	up	up	up	up	1.42745e-16	up	2.69053e-15	1.38551	up	[T]	Signal transduction mechanisms	Molecular Function: protein kinase activity (GO:0004672);; Molecular Function: ATP binding (GO:0005524);; Cellular Component: integral component of membrane (GO:0016021);;	K00924|3.4e-66|csat:104702328|K00924 kinase [EC:2.7.1.-] | (RefSeq) receptor protein kinase CLAVATA1-like	--	--	--	Protein kinase domain	LRR receptor-like serine/threonine-protein kinase GSO1 OS=Arabidopsis thaliana OX=3702 GN=GSO1 PE=1 SV=1	T	Signal transduction mechanisms	LRR receptor-like serine/threonine-protein kinase GSO1 [Prunus yedoensis var. nudiflora]	biological process: metabolic process (GO:0008152);; biological process: cellular process (GO:0009987);; molecular function: catalytic activity (GO:0003824);; molecular function: binding (GO:0005488);; cellular component: membrane (GO:0016020);; cellular component: membrane part (GO:0044425)
PaF106G0400015672.01	PaF106G0400015672.01	22.5777	632	16.1254	421	14.7118	448	2.06305	63	1.97704	51	2.69343	80	1.54461e-37	2.762	up	up	up	up	2.37093e-39	up	1.54461e-37	2.762	up	--	--	Biological Process: lipid transport (GO:0006869);; Molecular Function: lipid binding (GO:0008289);;	--	--	--	--	Protease inhibitor/seed storage/LTP family	--	O	Posttranslational modification, protein turnover, chaperones	non-specific lipid-transfer protein AP10-like [Prunus yedoensis var. nudiflora]	biological process: single-organism process (GO:0044699);; biological process: localization (GO:0051179);; molecular function: binding (GO:0005488)
PaF106G0800029463.01	PaF106G0800029463.01	0.63379	68	0.361618	37	1.47236	172	4.4912	525	3.3335	326	4.96198	562	0.000226638	-1.41553	down	down	down	down	5.36418e-05	down	0.000226638	-1.41553	down	[P]	Inorganic ion transport and metabolism	Biological Process: potassium ion transport (GO:0006813);; Molecular Function: potassium ion transmembrane transporter activity (GO:0015079);; Cellular Component: membrane (GO:0016020);; Cellular Component: integral component of membrane (GO:0016021);;	K03549|0.0e+00|pmum:103333887|K03549 KUP system potassium uptake protein | (RefSeq) potassium transporter 5-like	--	--	--	K+ potassium transporter	Potassium transporter 5 OS=Oryza sativa subsp. japonica OX=39947 GN=HAK5 PE=2 SV=2	P	Inorganic ion transport and metabolism	unnamed protein product [Prunus armeniaca]	biological process: localization (GO:0051179);; molecular function: transporter activity (GO:0005215);; cellular component: membrane (GO:0016020);; cellular component: membrane part (GO:0044425)
PaF106G0800031799.01	PaF106G0800031799.01	15.8002	993	12.07	702	11.8892	813	27.0181	1834	34.4169	1973	32.1412	2134	1.8951e-14	-1.11479	down	down	down	down	1.08353e-15	down	1.8951e-14	-1.11479	down	[Q]	Secondary metabolites biosynthesis, transport and catabolism	Molecular Function: metal ion binding (GO:0046872);; Molecular Function: dioxygenase activity (GO:0051213);;	K24028|2.1e-96|gmx:100776216|K24028 salicylic acid 3-hydroxylase [EC:1.14.11.-] | (RefSeq) protein DMR6-LIKE OXYGENASE 1	--	[QR]	Secondary metabolites biosynthesis, transport and catabolism;; General function prediction only	2OG-Fe(II) oxygenase superfamily	2-oxoglutarate-dependent dioxygenase 19 OS=Oryza sativa subsp. japonica OX=39947 GN=2ODD19 PE=1 SV=1	Q	Secondary metabolites biosynthesis, transport and catabolism	PREDICTED: protein DMR6-LIKE OXYGENASE 2-like [Prunus mume]	molecular function: binding (GO:0005488);; biological process: metabolic process (GO:0008152);; biological process: single-organism process (GO:0044699);; molecular function: catalytic activity (GO:0003824)
PaF106G0800030456.01	PaF106G0800030456.01	4.32603	574	4.49348	556	4.58625	661	1.43904	208	1.38557	167	1.3294	186	1.53877e-35	1.70105	up	up	up	up	2.53634e-37	up	1.53877e-35	1.70105	up	[R]	General function prediction only	Biological Process: signal transduction (GO:0007165);; Molecular Function: ADP binding (GO:0043531);;	K00695|3.9e-100|mtr:MTR_6g478030|K00695 sucrose synthase [EC:2.4.1.13] | (RefSeq) sucrose synthase	Starch and sucrose metabolism (ko00500)	--	--	TIR domain	TMV resistance protein N OS=Nicotiana glutinosa OX=35889 GN=N PE=1 SV=1	T	Signal transduction mechanisms	uncharacterized protein LOC110744265 [Prunus avium]	biological process: cellular process (GO:0009987);; biological process: biological regulation (GO:0065007);; molecular function: binding (GO:0005488)
PaF106G0800031130.01	PaF106G0800031130.01	1.3242	70	2.1731	107	1.51348	87	0.849617	49	0.508522	25	0.16316	10	0.000581387	1.24535	up	up	up	up	0.000150752	up	0.000581387	1.24535	up	[I]	Lipid transport and metabolism	Biological Process: catabolic process (GO:0009056);; Molecular Function: hydrolase activity (GO:0016787);;	K20506|7.2e-86|egu:105060863|K20506 tuliposide A-converting enzyme [EC:4.2.99.22] | (RefSeq) tuliposide A-converting enzyme 2, chloroplastic-like	--	[V]	Defense mechanisms	alpha/beta hydrolase fold	Probable carboxylesterase 12 OS=Arabidopsis thaliana OX=3702 GN=CXE12 PE=1 SV=1	V	Defense mechanisms	PREDICTED: probable carboxylesterase 12 [Prunus mume]	biological process: metabolic process (GO:0008152);; molecular function: catalytic activity (GO:0003824)
PaF106G0600024109.01	PaF106G0600024109.01	11.973	586	12.5019	568	11.9074	632	5.37116	286	5.85545	261	4.85337	250	1.19471e-18	1.20841	up	up	up	up	4.94154e-20	up	1.19471e-18	1.20841	up	--	--	Cellular Component: nucleus (GO:0005634);; Biological Process: regulation of transcription, DNA-templated (GO:0006355);; Molecular Function: sequence-specific DNA binding (GO:0043565);;	K09338|3.7e-157|pmum:103335807|K09338 homeobox-leucine zipper protein | (RefSeq) homeobox-leucine zipper protein HAT22	--	[K]	Transcription	Homeodomain	Homeobox-leucine zipper protein HAT22 OS=Arabidopsis thaliana OX=3702 GN=HAT22 PE=1 SV=1	K	Transcription	homeobox-leucine zipper protein HAT22 [Prunus persica]	cellular component: cell (GO:0005623);; cellular component: organelle (GO:0043226);; cellular component: cell part (GO:0044464);; biological process: biological regulation (GO:0065007);; molecular function: binding (GO:0005488)
[truncated: 474 more rows]
