# Supplementary material for: Mining for genes related to pistil abortion in Prunus sibirica L
Source: PeerJ. 2022 Nov 15;10:e14366. doi: 10.7717/peerj.14366 (PMC9673769; doi:10.7717/peerj.14366)
Supplement: Table S14 [file peerj-10-14366-s014.xls]

## Sheet: Sheet1
Table S14 The DEGs in NAC transcription factor family
#ID	gene_name	APt1_FPKM	APt2_FPKM	APt3_FPKM	NPt1_FPKM	NPt2_FPKM	NPt3_FPKM	NPt1_NPt2_NPt3_vs_APt1_APt2_APt3_DESeq2_log2FC	NPt1_NPt2_NPt3_vs_APt1_APt2_APt3_DESeq2_(FDR_0.01_FC_2)_regulated	APt1_count	APt2_count	APt3_count	NPt1_count	NPt2_count	NPt3_count	NPt1_NPt2_NPt3_vs_APt1_APt2_APt3_DESeq2_FDR	NPt1_NPt2_NPt3_vs_APt1_APt2_APt3_DESeq2_(FDR_0.05_FC_2)_regulated	NPt1_NPt2_NPt3_vs_APt1_APt2_APt3_DESeq2_(FDR_0.05_FC_1.5)_regulated	NPt1_NPt2_NPt3_vs_APt1_APt2_APt3_DESeq2_(FDR_0.05_FC_1)_regulated	NPt1_NPt2_NPt3_vs_APt1_APt2_APt3_DESeq2_Pvalue	NPt1_NPt2_NPt3_vs_APt1_APt2_APt3_DESeq2_(Pvalue_0.05_FC_2)_regulated	NPt1_NPt2_NPt3_vs_APt3_APt2_APt1_DESeq2_FDR	NPt1_NPt2_NPt3_vs_APt3_APt2_APt1_DESeq2_log2FC	NPt1_NPt2_NPt3_vs_APt3_APt2_APt1_DESeq2_(FDR_0.05_FC_2)_regulated	COG_class	COG_class_annotation	GO_annotation	KEGG_annotation	KEGG_pathway_annotation	KOG_class	KOG_class_annotation	Pfam_annotation	Swiss_Prot_annotation	eggNOG_class	eggNOG_class_annotation	NR_annotation	GO_second_level_annotation
PaF106G0800030499.01	PaF106G0800030499.01	4.35	5.17	5	2.37	2.22	1.55	1.21	up	474	523	583	286	225	181	1.35e-12	up	up	up	9e-14	up	1.35e-12	1.21245	up	[R]	General function prediction only	Biological Process: signal transduction (GO:0007165);; Molecular Function: ADP binding (GO:0043531);;	K00695|6.8e-108|mtr:MTR_6g478030|K00695 sucrose synthase [EC:2.4.1.13] | (RefSeq) sucrose synthase	Starch and sucrose metabolism (ko00500)	--	--	TIR domain	TMV resistance protein N OS=Nicotiana glutinosa OX=35889 GN=N PE=1 SV=1	G	Carbohydrate transport and metabolism	PREDICTED: TMV resistance protein N-like [Prunus mume]	biological process: cellular process (GO:0009987);; biological process: biological regulation (GO:0065007);; molecular function: binding (GO:0005488)
PaF106G0200006790.01	PaF106G0200006790.01	0.39	0.24	0.28	3.55	4.67	3.38	-3.25	down	87	50	68	811	896	750	1.76e-65	down	down	down	1.04e-67	down	1.76e-65	-3.24814	down	--	--	Molecular Function: motor activity (GO:0003774);; Molecular Function: actin binding (GO:0003779);; Molecular Function: ATP binding (GO:0005524);; Biological Process: actin filament organization (GO:0007015);; Cellular Component: myosin complex (GO:0016459);;	K10357|0.0e+00|pavi:110760740|K10357 myosin V | (RefSeq) myosin-12	--	[Z]	Cytoskeleton	Myosin head (motor domain)	Myosin-12 OS=Arabidopsis thaliana OX=3702 GN=XI-F PE=2 SV=1	Z	Cytoskeleton	unnamed protein product, partial [Prunus armeniaca]	molecular function: catalytic activity (GO:0003824);; molecular function: binding (GO:0005488);; biological process: cellular process (GO:0009987);; biological process: single-organism process (GO:0044699);; biological process: cellular component organization or biogenesis (GO:0071840);; cellular component: cell (GO:0005623);; cellular component: macromolecular complex (GO:0032991);; cellular com…
PaF106G0700027940.01	PaF106G0700027940.01	6.95	5.98	6.51	28.76	24.92	29.21	-1.96	down	430	345	438	1935	1401	1906	1.02e-60	down	down	down	6.98e-63	down	1.02e-60	-1.96309	down	[R]	General function prediction only	Cellular Component: endoplasmic reticulum (GO:0005783);; Biological Process: auxin metabolic process (GO:0009850);; Molecular Function: IAA-Ala conjugate hydrolase activity (GO:0010179);; Molecular Function: hydrolase activity (GO:0016787);;	K14664|3.0e-249|pmum:103341724|K14664 IAA-amino acid hydrolase [EC:3.5.1.-] | (RefSeq) IAA-amino acid hydrolase ILR1-like 3	--	--	--	Peptidase family M20/M25/M40	IAA-amino acid hydrolase ILR1-like 3 OS=Oryza sativa subsp. japonica OX=39947 GN=ILL3 PE=2 SV=1	S	Function unknown	unnamed protein product [Prunus armeniaca]	cellular component: cell (GO:0005623);; cellular component: organelle (GO:0043226);; cellular component: cell part (GO:0044464);; biological process: metabolic process (GO:0008152);; biological process: cellular process (GO:0009987);; biological process: biological regulation (GO:0065007);; molecular function: catalytic activity (GO:0003824)
PaF106G0200010176.01	PaF106G0200010176.01	0.31	0.3	0.36	3.23	1.78	1.24	-1.74	down	12	11	15	128	59	48	9.42e-07	down	down	down	1.38e-07	down	9.42e-07	-1.74001	down	--	--	Cellular Component: Golgi membrane (GO:0000139);; Molecular Function: transferase activity, transferring glycosyl groups (GO:0016757);; Biological Process: cell wall organization (GO:0071555);;	K06672|1.0e-31|pmum:103330237|K06672 cohesin loading factor subunit SCC2 | (RefSeq) nipped-B-like protein B	--	--	--	Nucleotide-diphospho-sugar transferase	Sister chromatid cohesion protein SCC2 OS=Arabidopsis thaliana OX=3702 GN=SCC2 PE=1 SV=1	S	Function unknown	uncharacterized protein At1g28695 [Prunus persica]	cellular component: cell (GO:0005623);; cellular component: membrane (GO:0016020);; cellular component: organelle (GO:0043226);; cellular component: organelle part (GO:0044422);; cellular component: cell part (GO:0044464);; molecular function: catalytic activity (GO:0003824);; biological process: cellular process (GO:0009987);; biological process: cellular component organization or biogenesis (GO…
PaF106G0800030480.01	PaF106G0800030480.01	19.73	22.81	18.03	6.89	6.29	5.97	1.68	up	1404	1513	1395	534	408	449	2.82e-41	up	up	up	3.78e-43	up	2.82e-41	1.68285	up	--	--	Cellular Component: integral component of membrane (GO:0016021);;	--	--	[O]	Posttranslational modification, protein turnover, chaperones	--	Chaperone protein dnaJ 10 OS=Arabidopsis thaliana OX=3702 GN=ATJ10 PE=2 SV=2	O	Posttranslational modification, protein turnover, chaperones	hypothetical protein Prudu_022499 [Prunus dulcis]	cellular component: membrane (GO:0016020);; cellular component: membrane part (GO:0044425)
PaF106G0800032313.01	PaF106G0800032313.01	0.36	0.45	0.43	1.22	1.46	1.35	-1.46	down	62	73	82	229	224	243	5.67e-12	down	down	down	4e-13	down	5.67e-12	-1.46238	down	[R]	General function prediction only	Biological Process: signal transduction (GO:0007165);; Molecular Function: ADP binding (GO:0043531);;	K00695|7.8e-127|mtr:MTR_6g478030|K00695 sucrose synthase [EC:2.4.1.13] | (RefSeq) sucrose synthase	Starch and sucrose metabolism (ko00500)	--	--	TIR domain	Disease resistance protein Roq1 OS=Nicotiana benthamiana OX=4100 GN=ROQ1 PE=1 SV=1	S	Function unknown	PREDICTED: TMV resistance protein N-like [Prunus mume]	biological process: cellular process (GO:0009987);; biological process: biological regulation (GO:0065007);; molecular function: binding (GO:0005488)
PaF106G0100006472.01	PaF106G0100006472.01	4.64	5.11	5.54	1.91	2.27	3	1.34	up	899	956	1185	406	399	434	5.31e-28	up	up	up	1.24e-29	up	5.31e-28	1.33601	up	--	--	Biological Process: signal transduction (GO:0007165);; Molecular Function: ADP binding (GO:0043531);;	K16225|1.9e-35|ath:AT5G45260|K16225 probable WRKY transcription factor 52 | (RefSeq) RRS1; Disease resistance protein (TIR-NBS-LRR class)	Plant-pathogen interaction (ko04626)	--	--	Leucine Rich repeats (2 copies)	TMV resistance protein N OS=Nicotiana glutinosa OX=35889 GN=N PE=1 SV=1	T	Signal transduction mechanisms	LOW QUALITY PROTEIN: disease resistance protein RPV1-like [Prunus dulcis]	biological process: cellular process (GO:0009987);; biological process: biological regulation (GO:0065007);; molecular function: binding (GO:0005488)
PaF106G0100006479.01	PaF106G0100006479.01	0.53	1.43	1.28	5.13	10.35	9.04	-1.39	down	97	102	120	332	328	286	3.33e-13	down	down	down	2.11e-14	down	3.33e-13	-1.38719	down	[R]	General function prediction only	Biological Process: signal transduction (GO:0007165);; Molecular Function: ADP binding (GO:0043531);;	K00695|1.4e-135|mtr:MTR_6g478030|K00695 sucrose synthase [EC:2.4.1.13] | (RefSeq) sucrose synthase	Starch and sucrose metabolism (ko00500)	--	--	TIR domain	Disease resistance protein RPV1 OS=Vitis rotundifolia OX=103349 GN=RPV1 PE=1 SV=1	T	Signal transduction mechanisms	LOW QUALITY PROTEIN: disease resistance protein RPV1-like [Prunus dulcis]	biological process: cellular process (GO:0009987);; biological process: biological regulation (GO:0065007);; molecular function: binding (GO:0005488)
PaF106G0700028369.01	PaF106G0700028369.01	8.54	8.21	9.62	0	0.02	0	7.97	up	2307	2068	2810	0	5	0	4.29e-222	up	up	up	1.77e-225	up	4.29e-222	7.97302	up	--	--	Biological Process: signal transduction (GO:0007165);; Molecular Function: ADP binding (GO:0043531);;	K00695|8.2e-89|mtr:MTR_6g478030|K00695 sucrose synthase [EC:2.4.1.13] | (RefSeq) sucrose synthase	Starch and sucrose metabolism (ko00500)	--	--	TIR domain	Disease resistance protein Roq1 OS=Nicotiana benthamiana OX=4100 GN=ROQ1 PE=1 SV=1	S	Function unknown	PREDICTED: disease resistance protein RPS6-like [Prunus mume]	biological process: cellular process (GO:0009987);; biological process: biological regulation (GO:0065007);; molecular function: binding (GO:0005488)
PaF106G0600025258.01	PaF106G0600025258.01	0.31	0.11	0.39	1.72	1.51	2.33	-1.97	down	18	6	24	106	77	139	3.38e-09	down	down	down	3.38e-10	down	3.38e-09	-1.97271	down	--	--	Cellular Component: integral component of membrane (GO:0016021);;	K03453|6.9e-28|pavi:110772440|K03453 bile acid:Na+ symporter, BASS family | (RefSeq) probable sodium/metabolite cotransporter BASS2, chloroplastic	--	[O]	Posttranslational modification, protein turnover, chaperones	--	Chaperone protein dnaJ 10 OS=Arabidopsis thaliana OX=3702 GN=ATJ10 PE=2 SV=2	P	Inorganic ion transport and metabolism	probable sodium/metabolite cotransporter BASS2, chloroplastic [Prunus avium]	cellular component: membrane (GO:0016020);; cellular component: membrane part (GO:0044425)
PaF106G0800030449.01	PaF106G0800030449.01	1.32	1.77	1.7	0.48	0.55	0.52	1.56	up	232	290	324	93	88	97	3.99e-15	up	up	up	2.14e-16	up	3.99e-15	1.56191	up	[R]	General function prediction only	Biological Process: signal transduction (GO:0007165);; Molecular Function: ADP binding (GO:0043531);;	K00695|1.3e-103|mtr:MTR_6g478030|K00695 sucrose synthase [EC:2.4.1.13] | (RefSeq) sucrose synthase	Starch and sucrose metabolism (ko00500)	--	--	TIR domain	TMV resistance protein N OS=Nicotiana glutinosa OX=35889 GN=N PE=1 SV=1	T	Signal transduction mechanisms	PREDICTED: disease resistance protein TAO1-like isoform X1 [Prunus mume]	biological process: cellular process (GO:0009987);; biological process: biological regulation (GO:0065007);; molecular function: binding (GO:0005488)
PaF106G0100004692.01	PaF106G0100004692.01	1.25	2.26	1.97	0.42	0.68	0.52	1.58	up	164	276	280	61	82	73	4.42e-10	up	up	up	3.9e-11	up	4.42e-10	1.58084	up	[ET]	Amino acid transport and metabolism;; Signal transduction mechanisms	Molecular Function: G-protein coupled receptor activity (GO:0004930);; Molecular Function: ligand-gated ion channel activity (GO:0015276);; Cellular Component: integral component of membrane (GO:0016021);;	K05387|0.0e+00|pmum:103320682|K05387 glutamate receptor, ionotropic, plant | (RefSeq) glutamate receptor 2.8-like	--	[PET]	Inorganic ion transport and metabolism;; Amino acid transport and metabolism;; Signal transduction mechanisms	Receptor family ligand binding region	Glutamate receptor 2.8 OS=Arabidopsis thaliana OX=3702 GN=GLR2.8 PE=2 SV=2	--	--	glutamate receptor 2.8-like [Prunus dulcis]	biological process: cellular process (GO:0009987);; biological process: signaling (GO:0023052);; biological process: single-organism process (GO:0044699);; biological process: response to stimulus (GO:0050896);; biological process: biological regulation (GO:0065007);; molecular function: signal transducer activity (GO:0004871);; molecular function: molecular transducer activity (GO:0060089);; bio…
PaF106G0400014719.01	PaF106G0400014719.01	4.1	3.58	3.98	0.7	0.78	0.82	2.31	up	775	631	817	144	134	164	2.89e-56	up	up	up	2.32e-58	up	2.89e-56	2.31411	up	[R]	General function prediction only	Biological Process: signal transduction (GO:0007165);; Molecular Function: ADP binding (GO:0043531);;	K00695|2.7e-157|mtr:MTR_6g478030|K00695 sucrose synthase [EC:2.4.1.13] | (RefSeq) sucrose synthase	Starch and sucrose metabolism (ko00500)	--	--	TIR domain	Disease resistance protein Roq1 OS=Nicotiana benthamiana OX=4100 GN=ROQ1 PE=1 SV=1	--	--	PREDICTED: disease resistance protein TAO1-like [Prunus mume]	biological process: cellular process (GO:0009987);; biological process: biological regulation (GO:0065007);; molecular function: binding (GO:0005488)
PaF106G0200008171.01	PaF106G0200008171.01	1.79	1.9	1.16	0.02	0	0	4.28	up	181	178	127	3	0	0	9.08e-38	up	up	up	1.38e-39	up	9.08e-38	4.28174	up	[ET]	Amino acid transport and metabolism;; Signal transduction mechanisms	Cellular Component: plasma membrane (GO:0005886);; Molecular Function: ligand-gated ion channel activity (GO:0015276);; Cellular Component: integral component of membrane (GO:0016021);; Molecular Function: signaling receptor activity (GO:0038023);;	K05387|1.0e-238|pavi:110769760|K05387 glutamate receptor, ionotropic, plant | (RefSeq) glutamate receptor 1.4-like	--	[PET]	Inorganic ion transport and metabolism;; Amino acid transport and metabolism;; Signal transduction mechanisms	Ligand-gated ion channel	Glutamate receptor 1.4 OS=Arabidopsis thaliana OX=3702 GN=GLR1.4 PE=2 SV=2	--	--	unnamed protein product [Prunus armeniaca]	cellular component: cell (GO:0005623);; cellular component: membrane (GO:0016020);; cellular component: cell part (GO:0044464);; biological process: localization (GO:0051179);; molecular function: transporter activity (GO:0005215);; molecular function: molecular transducer activity (GO:0060089);; cellular component: membrane part (GO:0044425);; biological process: cellular process (GO:0009987);; …
PaF106G0800029902.01	PaF106G0800029902.01	12.63	13.47	18.06	7.91	6.81	6.35	1.09	up	642	638	997	437	315	341	1.77e-12	up	up	up	1.19e-13	up	1.77e-12	1.08791	up	--	--	Molecular Function: DNA binding (GO:0003677);; Cellular Component: nucleus (GO:0005634);; Biological Process: regulation of transcription, DNA-templated (GO:0006355);;	K00521|5.7e-34|cmos:111447866|K00521 ferric-chelate reductase [EC:1.16.1.7] | (RefSeq) ferric reduction oxidase 7, chloroplastic-like	--	--	--	No apical meristem (NAM) protein	NAC domain-containing protein 21/22 OS=Arabidopsis thaliana OX=3702 GN=NAC021 PE=1 SV=2	K	Transcription	PREDICTED: protein CUP-SHAPED COTYLEDON 3-like [Prunus mume]	molecular function: binding (GO:0005488);; cellular component: cell (GO:0005623);; cellular component: organelle (GO:0043226);; cellular component: cell part (GO:0044464);; biological process: biological regulation (GO:0065007)
PaF106G0400015972.01	PaF106G0400015972.01	87.38	107.25	95.7	48.92	36.57	40.15	1.25	up	5448	6235	6486	3320	2074	2641	2.17e-28	up	up	up	4.97e-30	up	2.17e-28	1.25079	up	--	--	Molecular Function: DNA binding (GO:0003677);; Cellular Component: nucleus (GO:0005634);; Biological Process: regulation of transcription, DNA-templated (GO:0006355);;	K00521|2.8e-45|cmos:111447866|K00521 ferric-chelate reductase [EC:1.16.1.7] | (RefSeq) ferric reduction oxidase 7, chloroplastic-like	--	--	--	No apical meristem (NAM) protein	NAC domain-containing protein JA2 OS=Solanum lycopersicum OX=4081 GN=JA2 PE=2 SV=1	K	Transcription	unnamed protein product [Prunus armeniaca]	molecular function: binding (GO:0005488);; cellular component: cell (GO:0005623);; cellular component: organelle (GO:0043226);; cellular component: cell part (GO:0044464);; biological process: biological regulation (GO:0065007)
PaF106G0800031136.01	PaF106G0800031136.01	0.9	0.84	2.69	3.63	4.2	3.55	-1.02	down	41	36	133	180	174	170	0.00183072	down	down	down	0.000537315	down	0.00183072	-1.01954	down	[I]	Lipid transport and metabolism	Biological Process: catabolic process (GO:0009056);; Molecular Function: hydrolase activity (GO:0016787);;	K20506|1.9e-74|egu:105060863|K20506 tuliposide A-converting enzyme [EC:4.2.99.22] | (RefSeq) tuliposide A-converting enzyme 2, chloroplastic-like	--	[V]	Defense mechanisms	alpha/beta hydrolase fold	2-hydroxyisoflavanone dehydratase OS=Glycyrrhiza echinata OX=46348 GN=HIDM PE=1 SV=1	V	Defense mechanisms	PREDICTED: 2-hydroxyisoflavanone dehydratase-like [Prunus mume]	biological process: metabolic process (GO:0008152);; molecular function: catalytic activity (GO:0003824)
PaF106G0600022361.01	PaF106G0600022361.01	0.93	1.03	0.81	2.22	2.54	1.78	-1.08	down	146	151	138	377	361	295	4.08e-08	down	down	down	4.75e-09	down	4.08e-08	-1.07586	down	--	--	Biological Process: signal transduction (GO:0007165);; Molecular Function: ADP binding (GO:0043531);;	K16225|2.6e-20|csat:104760397|K16225 probable WRKY transcription factor 52 | (RefSeq) disease resistance protein RRS1-like	Plant-pathogen interaction (ko04626)	--	--	--	Disease resistance protein RUN1 OS=Vitis rotundifolia OX=103349 GN=RUN1 PE=1 SV=1	S	Function unknown	TMV resistance protein N-like [Prunus avium]	biological process: cellular process (GO:0009987);; biological process: biological regulation (GO:0065007);; molecular function: binding (GO:0005488)
PaF106G0100004690.01	PaF106G0100004690.01	0.8	0.84	1.04	2.43	2.06	2.56	-1.23	down	102	101	145	338	240	346	3.93e-10	down	down	down	3.46e-11	down	3.93e-10	-1.2288	down	--	--	Molecular Function: ligand-gated ion channel activity (GO:0015276);; Cellular Component: integral component of membrane (GO:0016021);;	K05387|3.3e-182|pmum:103320898|K05387 glutamate receptor, ionotropic, plant | (RefSeq) glutamate receptor 2.8-like	--	[PET]	Inorganic ion transport and metabolism;; Amino acid transport and metabolism;; Signal transduction mechanisms	Receptor family ligand binding region	Glutamate receptor 2.2 OS=Arabidopsis thaliana OX=3702 GN=GLR2.2 PE=2 SV=1	--	--	unnamed protein product [Prunus armeniaca]	biological process: localization (GO:0051179);; molecular function: transporter activity (GO:0005215);; molecular function: molecular transducer activity (GO:0060089);; cellular component: membrane (GO:0016020);; cellular component: membrane part (GO:0044425)
PaF106G0100006300.01	PaF106G0100006300.01	4.19	3.88	4.43	1.8	1.88	1.45	1.31	up	679	586	780	318	277	249	4.67e-21	up	up	up	1.68e-22	up	4.67e-21	1.3101	up	[R]	General function prediction only	Biological Process: signal transduction (GO:0007165);; Molecular Function: ADP binding (GO:0043531);;	K00695|5.0e-126|mtr:MTR_6g478030|K00695 sucrose synthase [EC:2.4.1.13] | (RefSeq) sucrose synthase	Starch and sucrose metabolism (ko00500)	--	--	TIR domain	Disease resistance protein RPV1 OS=Vitis rotundifolia OX=103349 GN=RPV1 PE=1 SV=1	T	Signal transduction mechanisms	disease resistance protein RPV1-like [Prunus dulcis]	biological process: cellular process (GO:0009987);; biological process: biological regulation (GO:0065007);; molecular function: binding (GO:0005488)
PaF106G0800032661.01	PaF106G0800032661.01	0.5	0.52	0.53	0	0.04	0.03	2.78	up	75	73	85	0	6	5	3.21e-15	up	up	up	1.71e-16	up	3.21e-15	2.78215	up	--	--	Molecular Function: protein binding (GO:0005515);; Biological Process: signal transduction (GO:0007165);; Molecular Function: ADP binding (GO:0043531);;	K00695|1.6e-141|mtr:MTR_6g478030|K00695 sucrose synthase [EC:2.4.1.13] | (RefSeq) sucrose synthase	Starch and sucrose metabolism (ko00500)	--	--	TIR domain	Disease resistance protein Roq1 OS=Nicotiana benthamiana OX=4100 GN=ROQ1 PE=1 SV=1	T	Signal transduction mechanisms	TMV resistance protein N-like [Prunus avium]	molecular function: binding (GO:0005488);; biological process: cellular process (GO:0009987);; biological process: biological regulation (GO:0065007)
PaF106G0800032154.01	PaF106G0800032154.01	0.74	0.77	0.78	0.22	0.22	0.21	1.63	up	123	119	139	40	33	37	2.83e-10	up	up	up	2.45e-11	up	2.83e-10	1.63024	up	[R]	General function prediction only	Biological Process: signal transduction (GO:0007165);; Molecular Function: ADP binding (GO:0043531);;	K00695|7.3e-127|mtr:MTR_6g478030|K00695 sucrose synthase [EC:2.4.1.13] | (RefSeq) sucrose synthase	Starch and sucrose metabolism (ko00500)	--	--	TIR domain	TMV resistance protein N OS=Nicotiana glutinosa OX=35889 GN=N PE=1 SV=1	S	Function unknown	TMV resistance protein N [Prunus persica]	biological process: cellular process (GO:0009987);; biological process: biological regulation (GO:0065007);; molecular function: binding (GO:0005488)
PaF106G0300011745.01	PaF106G0300011745.01	0.16	0.21	0.43	1.32	1.1	0.92	-1.34	down	8	10	23	70	49	48	0.00024602	down	down	down	5.88e-05	down	0.00024602	-1.34059	down	[M]	Cell wall/membrane/envelope biogenesis	Molecular Function: 3-beta-hydroxy-delta5-steroid dehydrogenase activity (GO:0003854);; Biological Process: steroid biosynthetic process (GO:0006694);;	K09753|1.1e-35|ppp:112293893|K09753 cinnamoyl-CoA reductase [EC:1.2.1.44] | (RefSeq) cinnamoyl-CoA reductase 1-like	Phenylpropanoid biosynthesis (ko00940)	[V]	Defense mechanisms	3-beta hydroxysteroid dehydrogenase/isomerase family	Cinnamoyl-CoA reductase-like SNL6 OS=Oryza sativa subsp. japonica OX=39947 GN=SNL6 PE=3 SV=1	V	Defense mechanisms	PREDICTED: dihydroflavonol-4-reductase-like [Prunus mume]	biological process: metabolic process (GO:0008152);; biological process: single-organism process (GO:0044699);; molecular function: catalytic activity (GO:0003824)
PaF106G0800032547.01	PaF106G0800032547.01	2.62	2.39	2.93	0.14	0.17	0.15	3.75	up	397	338	483	24	24	24	1.32e-68	up	up	up	7.37e-71	up	1.32e-68	3.746	up	[R]	General function prediction only	Biological Process: signal transduction (GO:0007165);; Molecular Function: ADP binding (GO:0043531);;	K00695|1.8e-113|mtr:MTR_6g478030|K00695 sucrose synthase [EC:2.4.1.13] | (RefSeq) sucrose synthase	Starch and sucrose metabolism (ko00500)	--	--	TIR domain	Disease resistance protein RUN1 OS=Vitis rotundifolia OX=103349 GN=RUN1 PE=1 SV=1	S	Function unknown	hypothetical protein PRUPE_8G056700 [Prunus persica]	biological process: cellular process (GO:0009987);; biological process: biological regulation (GO:0065007);; molecular function: binding (GO:0005488)
PaF106G0800030401.01	PaF106G0800030401.01	4.71	4.7	4.56	1.59	2.14	2.21	1.25	up	788	733	829	290	326	390	1.47e-16	up	up	up	7.08e-18	up	1.47e-16	1.25075	up	[R]	General function prediction only	Biological Process: signal transduction (GO:0007165);; Molecular Function: ADP binding (GO:0043531);;	K00695|1.0e-97|mtr:MTR_6g478030|K00695 sucrose synthase [EC:2.4.1.13] | (RefSeq) sucrose synthase	Starch and sucrose metabolism (ko00500)	--	--	TIR domain	TMV resistance protein N OS=Nicotiana glutinosa OX=35889 GN=N PE=1 SV=1	T	Signal transduction mechanisms	PREDICTED: probable disease resistance protein RPP1 isoform X2 [Prunus mume]	biological process: cellular process (GO:0009987);; biological process: biological regulation (GO:0065007);; molecular function: binding (GO:0005488)
PaF106G0700028364.01	PaF106G0700028364.01	1.26	0.96	1.16	0.02	0	0	5.03	up	312	221	311	5	0	0	1.91e-61	up	up	up	1.29e-63	up	1.91e-61	5.03267	up	--	--	Biological Process: signal transduction (GO:0007165);; Molecular Function: ADP binding (GO:0043531);;	K16225|1.0e-61|ath:AT5G45260|K16225 probable WRKY transcription factor 52 | (RefSeq) RRS1; Disease resistance protein (TIR-NBS-LRR class)	Plant-pathogen interaction (ko04626)	--	--	NB-ARC domain	Disease resistance protein Roq1 OS=Nicotiana benthamiana OX=4100 GN=ROQ1 PE=1 SV=1	S	Function unknown	PREDICTED: LOW QUALITY PROTEIN: uncharacterized protein LOC103339370 [Prunus mume]	biological process: cellular process (GO:0009987);; biological process: biological regulation (GO:0065007);; molecular function: binding (GO:0005488)
PaF106G0300012958.01	PaF106G0300012958.01	2.54	2.76	2.44	1.35	0.54	1.12	1.15	up	106	107	111	62	21	49	0.000214397	up	up	up	5.04e-05	up	0.000214397	1.146	up	[O]	Posttranslational modification, protein turnover, chaperones	Molecular Function: cysteine-type endopeptidase activity (GO:0004197);; Cellular Component: integral component of membrane (GO:0016021);; Biological Process: CAAX-box protein processing (GO:0071586);;	K23336|3.3e-20|smo:SELMODRAFT_439598|K23336 armadillo repeat-containing protein 8 | (RefSeq) hypothetical protein	--	--	--	CPBP intramembrane metalloprotease	--	S	Function unknown	PREDICTED: uncharacterized protein LOC103343368 isoform X2 [Prunus mume]	biological process: metabolic process (GO:0008152);; molecular function: catalytic activity (GO:0003824);; cellular component: membrane (GO:0016020);; cellular component: membrane part (GO:0044425)
PaF106G0100006520.01	PaF106G0100006520.01	14.04	13.61	14.5	5.34	4.58	4.94	1.43	up	671	607	764	301	217	262	1.38e-27	up	up	up	3.32e-29	up	1.38e-27	1.43123	up	--	--	Biological Process: signal transduction (GO:0007165);; Molecular Function: ADP binding (GO:0043531);;	--	--	--	--	Leucine Rich repeats (2 copies)	--	T	Signal transduction mechanisms	TMV resistance protein N-like [Prunus avium]	biological process: cellular process (GO:0009987);; biological process: biological regulation (GO:0065007);; molecular function: binding (GO:0005488)
Prunus_sibirica_newGene_265	--	37.09	32.98	33.72	15.06	15.26	14.74	1.26	up	2662	2208	2638	1178	997	1117	3.56e-40	up	up	up	5.02e-42	up	3.56e-40	1.25776	up	--	--	Molecular Function: nucleic acid binding (GO:0003676);;	K23280|3.1e-46|sly:101257103|K23280 rhamnogalacturonan I rhamnosyltransferase [EC:2.4.1.351] | (RefSeq) uncharacterized protein LOC101257103 isoform X1	--	[R]	General function prediction only	gag-polypeptide of LTR copia-type	--	L	Replication, recombination and repair	PREDICTED: uncharacterized protein LOC103334794 [Prunus mume]	molecular function: binding (GO:0005488)
PaF106G0400015293.01	PaF106G0400015293.01	0	0	0	0.5	0.45	0.43	-2.7	down	0	0	0	54	40	45	9.14e-13	down	down	down	5.98e-14	down	9.14e-13	-2.69652	down	--	--	Molecular Function: cysteine-type peptidase activity (GO:0008234);;	K12235|6.5e-14|pavi:110763563|K12235 serine racemase [EC:5.1.1.18] | (RefSeq) uncharacterized protein LOC110763563 isoform X1	Glycine, serine and threonine metabolism (ko00260)	--	--	Ulp1 protease family, C-terminal catalytic domain	--	S	Function unknown	PREDICTED: PRUPE_6G193600, partial [Prunus dulcis]	biological process: metabolic process (GO:0008152);; molecular function: catalytic activity (GO:0003824)
Prunus_sibirica_newGene_1238	--	4.64	3.74	4.09	0.12	0.1	0	2.28	up	327	240	304	10	7	0	2.75e-09	up	up	up	2.7e-10	up	2.75e-09	2.27979	up	--	--	--	K12447|4.3e-57|csat:109127935|K12447 UDP-sugar pyrophosphorylase [EC:2.7.7.64] | (RefSeq) uncharacterized protein LOC109127935	Pentose and glucuronate interconversions (ko00040);; Galactose metabolism (ko00052);; Ascorbate and aldarate metabolism (ko00053);; Amino sugar and nucleotide sugar metabolism (ko00520)	[R]	General function prediction only	gag-polypeptide of LTR copia-type	--	L	Replication, recombination and repair	uncharacterized protein LOC109947549 isoform X1 [Prunus persica]	--
PaF106G0500019643.01	PaF106G0500019643.01	1.97	2.07	2.38	1.03	0.78	1.11	1.02	up	91	89	120	52	33	54	0.00032228	up	up	up	7.88e-05	up	0.00032228	1.01869	up	[IQR]	Lipid transport and metabolism;; Secondary metabolites biosynthesis, transport and catabolism;; General function prediction only	Cellular Component: membrane (GO:0016020);; Biological Process: oxidation-reduction process (GO:0055114);;	K15095|7.0e-162|pmum:103337493|K15095 (+)-neomenthol dehydrogenase [EC:1.1.1.208] | (RefSeq) salutaridine reductase-like	Monoterpenoid biosynthesis (ko00902)	[Q]	Secondary metabolites biosynthesis, transport and catabolism	short chain dehydrogenase	Salutaridine reductase OS=Papaver bracteatum OX=215227 GN=SALR PE=1 SV=1	Q	Secondary metabolites biosynthesis, transport and catabolism	PREDICTED: salutaridine reductase-like [Prunus mume]	cellular component: membrane (GO:0016020);; biological process: metabolic process (GO:0008152);; biological process: single-organism process (GO:0044699)
PaF106G0800032368.01	PaF106G0800032368.01	0.63	0.66	0.74	0.21	0.24	0.18	1.47	up	91	89	116	34	31	28	2.48e-07	up	up	up	3.31e-08	up	2.48e-07	1.46551	up	--	--	Biological Process: signal transduction (GO:0007165);; Cellular Component: integral component of membrane (GO:0016021);; Molecular Function: ADP binding (GO:0043531);;	K00695|2.4e-111|mtr:MTR_6g478030|K00695 sucrose synthase [EC:2.4.1.13] | (RefSeq) sucrose synthase	Starch and sucrose metabolism (ko00500)	--	--	TIR domain	Disease resistance protein Roq1 OS=Nicotiana benthamiana OX=4100 GN=ROQ1 PE=1 SV=1	S	Function unknown	TMV resistance protein N [Prunus persica]	biological process: cellular process (GO:0009987);; biological process: biological regulation (GO:0065007);; cellular component: membrane (GO:0016020);; cellular component: membrane part (GO:0044425);; molecular function: binding (GO:0005488)
PaF106G0100000244.01	PaF106G0100000244.01	4.89	4.05	5.59	1.36	3.1	2.08	1.11	up	714	552	889	217	413	322	8.6e-07	up	up	up	1.25e-07	up	8.6e-07	1.109	up	[R]	General function prediction only	Biological Process: signal transduction (GO:0007165);; Molecular Function: ADP binding (GO:0043531);;	K00695|2.7e-163|mtr:MTR_6g478030|K00695 sucrose synthase [EC:2.4.1.13] | (RefSeq) sucrose synthase	Starch and sucrose metabolism (ko00500)	--	--	TIR domain	Disease resistance protein RPV1 OS=Vitis rotundifolia OX=103349 GN=RPV1 PE=1 SV=1	T	Signal transduction mechanisms	PREDICTED: TMV resistance protein N-like [Prunus mume]	biological process: cellular process (GO:0009987);; biological process: biological regulation (GO:0065007);; molecular function: binding (GO:0005488)
PaF106G0200010558.01	PaF106G0200010558.01	2.02	1.88	1.58	16.19	13.96	11.44	-2.7	down	158	137	134	1371	988	940	8.02e-65	down	down	down	4.88e-67	down	8.02e-65	-2.70062	down	[G]	Carbohydrate transport and metabolism	Molecular Function: polygalacturonase activity (GO:0004650);; Cellular Component: extracellular region (GO:0005576);; Biological Process: carbohydrate metabolic process (GO:0005975);; Molecular Function: lyase activity (GO:0016829);; Biological Process: cell wall organization (GO:0071555);;	K01184|4.6e-28|csat:104772314|K01184 polygalacturonase [EC:3.2.1.15] | (RefSeq) probable polygalacturonase At3g15720	Pentose and glucuronate interconversions (ko00040)	--	--	Glycosyl hydrolases family 28	Probable polygalacturonase OS=Vitis vinifera OX=29760 GN=GSVIVT00026920001 PE=1 SV=1	G	Carbohydrate transport and metabolism	unnamed protein product [Prunus armeniaca]	molecular function: catalytic activity (GO:0003824);; cellular component: extracellular region (GO:0005576);; biological process: metabolic process (GO:0008152);; biological process: cellular process (GO:0009987);; biological process: cellular component organization or biogenesis (GO:0071840)
PaF106G0300013589.01	PaF106G0300013589.01	0.2	0.19	0.35	2.16	2.17	1.47	-2.4	down	20	18	39	235	197	154	2.3e-18	down	down	down	9.72e-20	down	2.3e-18	-2.39525	down	--	--	Molecular Function: zinc ion binding (GO:0008270);; Biological Process: RNA modification (GO:0009451);; Cellular Component: intracellular membrane-bounded organelle (GO:0043231);;	K22651|2.2e-123|mdm:103443441|K22651 E3 ubiquitin-protein ligase RNF4 [EC:2.3.2.27] | (RefSeq) LOW QUALITY PROTEIN: pentatricopeptide repeat-containing protein At1g50270-like	--	[R]	General function prediction only	PPR repeat family	Putative pentatricopeptide repeat-containing protein At3g15930 OS=Arabidopsis thaliana OX=3702 GN=PCMP-E51 PE=3 SV=2	S	Function unknown	PREDICTED: LOW QUALITY PROTEIN: putative pentatricopeptide repeat-containing protein At3g15930 [Prunus mume]	molecular function: binding (GO:0005488);; biological process: metabolic process (GO:0008152);; biological process: cellular process (GO:0009987);; cellular component: cell (GO:0005623);; cellular component: organelle (GO:0043226);; cellular component: cell part (GO:0044464)
Prunus_sibirica_newGene_893	--	0.25	0.29	0.35	2.47	2.23	2.47	-2.56	down	25	27	37	257	195	251	1.18e-27	down	down	down	2.82e-29	down	1.18e-27	-2.56067	down	--	--	Molecular Function: ATP binding (GO:0005524);;	--	--	--	--	PPR repeat family	--	--	--	ATP-binding protein [Prunus dulcis]	molecular function: binding (GO:0005488)
PaF106G0200007131.01	PaF106G0200007131.01	1.25	1.08	1.63	3.1	3.89	3.84	-1.3	down	160	134	233	444	467	525	1.73e-12	down	down	down	1.16e-13	down	1.73e-12	-1.29515	down	--	--	Molecular Function: molecular_function (GO:0003674);; Molecular Function: nucleic acid binding (GO:0003676);; Molecular Function: RNA binding (GO:0003723);; Molecular Function: catalytic activity (GO:0003824);; Molecular Function: nuclease activity (GO:0004518);; Molecular Function: endonuclease activity (GO:0004519);; Molecular Function: binding (GO:0005488);; Cellular Component: cellular_compon…	K20291|8.6e-09|gab:108479373|K20291 conserved oligomeric Golgi complex subunit 4 | (RefSeq) pentatricopeptide repeat-containing protein At4g01400, mitochondrial-like	--	[R]	General function prediction only	PPR repeat family	Pentatricopeptide repeat-containing protein At4g20740 OS=Arabidopsis thaliana OX=3702 GN=At4g20740 PE=3 SV=1	S	Function unknown	unnamed protein product [Prunus armeniaca]	molecular function: binding (GO:0005488);; molecular function: catalytic activity (GO:0003824);; biological process: metabolic process (GO:0008152);; biological process: cellular process (GO:0009987);; cellular component: cell (GO:0005623);; cellular component: cell part (GO:0044464);; cellular component: organelle (GO:0043226)
PaF106G0100003324.01	PaF106G0100003324.01	12.28	17.45	19.86	8.85	5.53	5.66	1.28	up	613	812	1078	481	251	299	5.7e-11	up	up	up	4.54e-12	up	5.7e-11	1.27753	up	--	--	Molecular Function: DNA binding (GO:0003677);; Cellular Component: nucleus (GO:0005634);; Biological Process: regulation of transcription, DNA-templated (GO:0006355);;	K00521|2.6e-41|cmos:111447866|K00521 ferric-chelate reductase [EC:1.16.1.7] | (RefSeq) ferric reduction oxidase 7, chloroplastic-like	--	--	--	No apical meristem (NAM) protein	NAC domain-containing protein 2 OS=Solanum lycopersicum OX=4081 GN=NAP2 PE=2 SV=1	K	Transcription	PREDICTED: NAC transcription factor 29 [Prunus mume]	molecular function: binding (GO:0005488);; cellular component: cell (GO:0005623);; cellular component: organelle (GO:0043226);; cellular component: cell part (GO:0044464);; biological process: biological regulation (GO:0065007)
PaF106G0800032454.01	PaF106G0800032454.01	0.08	0.1	0.09	0.72	0.82	0.45	-1.84	down	8	9	9	71	68	43	2.44e-07	down	down	down	3.25e-08	down	2.44e-07	-1.84069	down	[R]	General function prediction only	Biological Process: signal transduction (GO:0007165);; Molecular Function: ADP binding (GO:0043531);;	K00695|8.0e-89|mtr:MTR_6g478030|K00695 sucrose synthase [EC:2.4.1.13] | (RefSeq) sucrose synthase	Starch and sucrose metabolism (ko00500)	--	--	NB-ARC domain	Disease resistance protein Roq1 OS=Nicotiana benthamiana OX=4100 GN=ROQ1 PE=1 SV=1	S	Function unknown	PREDICTED: TMV resistance protein N-like [Prunus mume]	biological process: cellular process (GO:0009987);; biological process: biological regulation (GO:0065007);; molecular function: binding (GO:0005488)
PaF106G0200010531.01	PaF106G0200010531.01	69.23	59.88	71.46	152.13	127.16	164.68	-1.05	down	5773	4656	6477	13806	9642	14488	3.59e-21	down	down	down	1.29e-22	down	3.59e-21	-1.05099	down	--	--	Molecular Function: transferase activity, transferring acyl groups other than amino-acyl groups (GO:0016747);;	K19747|6.2e-252|pmum:103333179|K19747 BAHD acyltransferase [EC:2.3.1.-] | (RefSeq) BAHD acyltransferase DCR	--	--	--	Transferase family	BAHD acyltransferase DCR OS=Arabidopsis thaliana OX=3702 GN=DCR PE=2 SV=1	S	Function unknown	unnamed protein product [Prunus armeniaca]	molecular function: catalytic activity (GO:0003824)
PaF106G0800032588.01	PaF106G0800032588.01	2.13	2.66	3.52	0	0.01	0	5.7	up	329	356	549	0	2	0	8.34e-80	up	up	up	3.78e-82	up	8.34e-80	5.69611	up	--	--	Molecular Function: protein binding (GO:0005515);; Biological Process: signal transduction (GO:0007165);; Molecular Function: ADP binding (GO:0043531);;	K00695|6.2e-141|mtr:MTR_6g478030|K00695 sucrose synthase [EC:2.4.1.13] | (RefSeq) sucrose synthase	Starch and sucrose metabolism (ko00500)	--	--	TIR domain	Disease resistance protein Roq1 OS=Nicotiana benthamiana OX=4100 GN=ROQ1 PE=1 SV=1	T	Signal transduction mechanisms	TMV resistance protein N-like [Prunus avium]	molecular function: binding (GO:0005488);; biological process: cellular process (GO:0009987);; biological process: biological regulation (GO:0065007)
PaF106G0400016192.01	PaF106G0400016192.01	0.23	0.21	0.26	0.04	0.05	0.06	1.5	up	46	39	57	10	10	13	2.84e-05	up	up	up	5.5e-06	up	2.84e-05	1.50441	up	[ET]	Amino acid transport and metabolism;; Signal transduction mechanisms	Cellular Component: plasma membrane (GO:0005886);; Molecular Function: ligand-gated ion channel activity (GO:0015276);; Cellular Component: integral component of membrane (GO:0016021);; Molecular Function: signaling receptor activity (GO:0038023);;	K05387|7.0e-145|egu:105039729|K05387 glutamate receptor, ionotropic, plant | (RefSeq) glutamate receptor 2.8-like	--	[PET]	Inorganic ion transport and metabolism;; Amino acid transport and metabolism;; Signal transduction mechanisms	Receptor family ligand binding region	Glutamate receptor 2.9 OS=Arabidopsis thaliana OX=3702 GN=GLR2.9 PE=2 SV=1	--	--	hypothetical protein PRUPE_4G171700 [Prunus persica]	cellular component: cell (GO:0005623);; cellular component: membrane (GO:0016020);; cellular component: cell part (GO:0044464);; biological process: localization (GO:0051179);; molecular function: transporter activity (GO:0005215);; molecular function: molecular transducer activity (GO:0060089);; cellular component: membrane part (GO:0044425);; biological process: cellular process (GO:0009987);; …
PaF106G0100002088.01	PaF106G0100002088.01	1.43	1.79	1.74	5.44	3.41	2.81	-1.04	down	118	138	157	488	256	245	1.33e-05	down	down	down	2.41e-06	down	1.33e-05	-1.03505	down	[GI]	Carbohydrate transport and metabolism;; Lipid transport and metabolism	Molecular Function: pectinesterase activity (GO:0030599);; Biological Process: cell wall modification (GO:0042545);; Molecular Function: aspartyl esterase activity (GO:0045330);; Biological Process: pectin catabolic process (GO:0045490);; Molecular Function: pectinesterase inhibitor activity (GO:0046910);;	K01051|5.0e-132|hbr:110663013|K01051 pectinesterase [EC:3.1.1.11] | (RefSeq) pectinesterase 2-like isoform X1	Pentose and glucuronate interconversions (ko00040)	--	--	Pectinesterase	Probable pectinesterase/pectinesterase inhibitor 35 OS=Arabidopsis thaliana OX=3702 GN=PME35 PE=2 SV=1	T	Signal transduction mechanisms	unnamed protein product [Prunus armeniaca]	molecular function: catalytic activity (GO:0003824);; biological process: cellular process (GO:0009987);; biological process: cellular component organization or biogenesis (GO:0071840);; biological process: metabolic process (GO:0008152);; biological process: biological regulation (GO:0065007);; molecular function: molecular function regulator (GO:0098772)
PaF106G0800031261.01	PaF106G0800031261.01	0.05	0.5	0.15	1.08	1.45	1.2	-1.96	down	7	17	5	100	60	80	3.48e-08	down	down	down	3.99e-09	down	3.48e-08	-1.96234	down	--	--	Biological Process: signal transduction (GO:0007165);; Molecular Function: ADP binding (GO:0043531);;	K00695|2.9e-168|mtr:MTR_6g478030|K00695 sucrose synthase [EC:2.4.1.13] | (RefSeq) sucrose synthase	Starch and sucrose metabolism (ko00500)	--	--	TIR domain	Disease resistance protein Roq1 OS=Nicotiana benthamiana OX=4100 GN=ROQ1 PE=1 SV=1	T	Signal transduction mechanisms	TMV resistance protein N [Prunus persica]	biological process: cellular process (GO:0009987);; biological process: biological regulation (GO:0065007);; molecular function: binding (GO:0005488)
PaF106G0700028239.01	PaF106G0700028239.01	0.7	0.46	0.74	2.3	2.8	2.33	-1.33	down	83	51	93	219	218	226	8.51e-09	down	down	down	8.94e-10	down	8.51e-09	-1.32705	down	--	--	Molecular Function: molecular_function (GO:0003674);; Molecular Function: nucleic acid binding (GO:0003676);; Molecular Function: RNA binding (GO:0003723);; Molecular Function: catalytic activity (GO:0003824);; Molecular Function: nuclease activity (GO:0004518);; Molecular Function: endonuclease activity (GO:0004519);; Molecular Function: binding (GO:0005488);; Cellular Component: cellular_compon…	K20291|2.0e-09|mtr:MTR_7g118240|K20291 conserved oligomeric Golgi complex subunit 4 | (RefSeq) PPR containing plant-like protein	--	--	--	PPR repeat family	Pentatricopeptide repeat-containing protein At2g17525, mitochondrial OS=Arabidopsis thaliana OX=3702 GN=At2g17525 PE=2 SV=2	S	Function unknown	PREDICTED: pentatricopeptide repeat-containing protein At2g17525, mitochondrial [Prunus mume]	molecular function: binding (GO:0005488);; molecular function: catalytic activity (GO:0003824);; biological process: metabolic process (GO:0008152);; biological process: cellular process (GO:0009987);; cellular component: cell (GO:0005623);; cellular component: cell part (GO:0044464);; cellular component: organelle (GO:0043226)
PaF106G0800032319.01	PaF106G0800032319.01	3.19	3.24	3.33	0.5	0.58	0.44	2.61	up	534	506	605	91	89	78	1.45e-58	up	up	up	1.05e-60	up	1.45e-58	2.61374	up	[R]	General function prediction only	Biological Process: signal transduction (GO:0007165);; Molecular Function: ADP binding (GO:0043531);;	K00695|5.7e-130|mtr:MTR_6g478030|K00695 sucrose synthase [EC:2.4.1.13] | (RefSeq) sucrose synthase	Starch and sucrose metabolism (ko00500)	--	--	TIR domain	TMV resistance protein N OS=Nicotiana glutinosa OX=35889 GN=N PE=1 SV=1	S	Function unknown	PREDICTED: TMV resistance protein N-like [Prunus mume]	biological process: cellular process (GO:0009987);; biological process: biological regulation (GO:0065007);; molecular function: binding (GO:0005488)
PaF106G0800032487.01	PaF106G0800032487.01	15.43	15.9	17.16	0.93	1.02	0.63	4.11	up	2628	2565	3214	182	168	108	6.76e-188	up	up	up	4.53e-191	up	6.76e-188	4.11077	up	[R]	General function prediction only	Biological Process: signal transduction (GO:0007165);; Molecular Function: ADP binding (GO:0043531);;	K00695|2.4e-101|mtr:MTR_6g478030|K00695 sucrose synthase [EC:2.4.1.13] | (RefSeq) sucrose synthase	Starch and sucrose metabolism (ko00500)	--	--	TIR domain	Disease resistance protein Roq1 OS=Nicotiana benthamiana OX=4100 GN=ROQ1 PE=1 SV=1	S	Function unknown	PREDICTED: TMV resistance protein N-like isoform X2 [Prunus mume]	biological process: cellular process (GO:0009987);; biological process: biological regulation (GO:0065007);; molecular function: binding (GO:0005488)
PaF106G0700027870.01	PaF106G0700027870.01	6.14	7.63	11.9	1.73	1.81	1.69	2.18	up	482	561	1001	145	131	138	1.03e-27	up	up	up	2.44e-29	up	1.03e-27	2.17764	up	[G]	Carbohydrate transport and metabolism	Molecular Function: hydrolase activity, hydrolyzing O-glycosyl compounds (GO:0004553);; Biological Process: carbohydrate metabolic process (GO:0005975);;	K13031|1.2e-158|pper:18770931|K13031 amygdalin beta-glucosidase [EC:3.2.1.117] | (RefSeq) beta-glucosidase 12 isoform X1	Cyanoamino acid metabolism (ko00460)	[G]	Carbohydrate transport and metabolism	Glycosyl hydrolase family 1	Cyanogenic beta-glucosidase (Fragment) OS=Trifolium repens OX=3899 GN=LI PE=1 SV=1	G	Carbohydrate transport and metabolism	cyanogenic beta-glucosidase isoform X2 [Prunus persica]	molecular function: catalytic activity (GO:0003824);; biological process: metabolic process (GO:0008152)
PaF106G0200007569.01	PaF106G0200007569.01	0.84	0.51	0.77	11.67	16.56	15.66	-4.07	down	260	149	260	3924	4653	5091	3.97e-146	down	down	down	4.91e-149	down	3.97e-146	-4.07214	down	--	--	Biological Process: signal transduction (GO:0007165);; Molecular Function: ADP binding (GO:0043531);;	K00695|2.6e-155|mtr:MTR_6g478030|K00695 sucrose synthase [EC:2.4.1.13] | (RefSeq) sucrose synthase	Starch and sucrose metabolism (ko00500)	--	--	TIR domain	TMV resistance protein N OS=Nicotiana glutinosa OX=35889 GN=N PE=1 SV=1	T	Signal transduction mechanisms	PREDICTED: TMV resistance [Prunus dulcis]	biological process: cellular process (GO:0009987);; biological process: biological regulation (GO:0065007);; molecular function: binding (GO:0005488)
PaF106G0700026926.01	PaF106G0700026926.01	6.03	6.71	6.12	33.69	33.72	28.48	-2.25	down	738	784	832	4578	3864	3795	4.35e-128	down	down	down	8.28e-131	down	4.35e-128	-2.24937	down	[E]	Amino acid transport and metabolism	Cellular Component: plasma membrane (GO:0005886);; Molecular Function: ligand-gated ion channel activity (GO:0015276);; Cellular Component: integral component of membrane (GO:0016021);; Molecular Function: signaling receptor activity (GO:0038023);;	K05387|6.0e-150|pavi:110748851|K05387 glutamate receptor, ionotropic, plant | (RefSeq) glutamate receptor 3.6-like isoform X1	--	[PET]	Inorganic ion transport and metabolism;; Amino acid transport and metabolism;; Signal transduction mechanisms	Receptor family ligand binding region	Glutamate receptor 3.6 OS=Arabidopsis thaliana OX=3702 GN=GLR3.6 PE=2 SV=1	--	--	hypothetical protein PRUPE_7G184400 [Prunus persica]	cellular component: cell (GO:0005623);; cellular component: membrane (GO:0016020);; cellular component: cell part (GO:0044464);; biological process: localization (GO:0051179);; molecular function: transporter activity (GO:0005215);; molecular function: molecular transducer activity (GO:0060089);; cellular component: membrane part (GO:0044425);; biological process: cellular process (GO:0009987);; …
PaF106G0800030456.01	PaF106G0800030456.01	4.33	4.49	4.59	1.44	1.39	1.33	1.7	up	574	556	661	208	167	186	1.54e-35	up	up	up	2.54e-37	up	1.54e-35	1.70105	up	[R]	General function prediction only	Biological Process: signal transduction (GO:0007165);; Molecular Function: ADP binding (GO:0043531);;	K00695|3.9e-100|mtr:MTR_6g478030|K00695 sucrose synthase [EC:2.4.1.13] | (RefSeq) sucrose synthase	Starch and sucrose metabolism (ko00500)	--	--	TIR domain	TMV resistance protein N OS=Nicotiana glutinosa OX=35889 GN=N PE=1 SV=1	T	Signal transduction mechanisms	uncharacterized protein LOC110744265 [Prunus avium]	biological process: cellular process (GO:0009987);; biological process: biological regulation (GO:0065007);; molecular function: binding (GO:0005488)
PaF106G0100006489.01	PaF106G0100006489.01	10.05	9.78	11.2	2.88	1.8	2.94	1.74	up	1093	1011	1349	388	306	373	4.97e-54	up	up	up	4.33e-56	up	4.97e-54	1.73657	up	[R]	General function prediction only	Biological Process: signal transduction (GO:0007165);; Molecular Function: ADP binding (GO:0043531);;	K00695|1.1e-135|mtr:MTR_6g478030|K00695 sucrose synthase [EC:2.4.1.13] | (RefSeq) sucrose synthase	Starch and sucrose metabolism (ko00500)	--	--	TIR domain	TMV resistance protein N OS=Nicotiana glutinosa OX=35889 GN=N PE=1 SV=1	T	Signal transduction mechanisms	TMV resistance protein N isoform X1 [Prunus persica]	biological process: cellular process (GO:0009987);; biological process: biological regulation (GO:0065007);; molecular function: binding (GO:0005488)
PaF106G0600022481.01	PaF106G0600022481.01	3.74	2.66	2.88	0	0	0	3.43	up	87	58	73	0	0	0	3e-21	up	up	up	1.07e-22	up	3e-21	3.42935	up	--	--	Biological Process: mitochondrial RNA metabolic process (GO:0000959);; Biological Process: mitochondrial RNA processing (GO:0000963);; Biological Process: RNA 5'-end processing (GO:0000966);; Molecular Function: molecular_function (GO:0003674);; Molecular Function: nucleic acid binding (GO:0003676);; Molecular Function: RNA binding (GO:0003723);; Molecular Function: catalytic activity (GO:0003824…	--	--	[J]	Translation, ribosomal structure and biogenesis	PPR repeat family	--	S	Function unknown	putative pentatricopeptide repeat-containing protein At1g12700, mitochondrial [Manihot esculenta]	biological process: metabolic process (GO:0008152);; biological process: cellular process (GO:0009987);; molecular function: binding (GO:0005488);; molecular function: catalytic activity (GO:0003824);; cellular component: cell (GO:0005623);; cellular component: cell part (GO:0044464);; cellular component: organelle (GO:0043226);; biological process: multicellular organismal process (GO:0032501);;…
PaF106G0200008900.01	PaF106G0200008900.01	10.59	10.64	11.55	5.61	4.57	4.43	1.35	up	885	859	1091	474	308	371	1.09e-25	up	up	up	3e-27	up	1.09e-25	1.34795	up	[IQR]	Lipid transport and metabolism;; Secondary metabolites biosynthesis, transport and catabolism;; General function prediction only	--	K15095|2.8e-166|pavi:110759311|K15095 (+)-neomenthol dehydrogenase [EC:1.1.1.208] | (RefSeq) uncharacterized protein LOC110759311	--	[Q]	Secondary metabolites biosynthesis, transport and catabolism	short chain dehydrogenase	(+)-neomenthol dehydrogenase OS=Arabidopsis thaliana OX=3702 GN=SDR1 PE=1 SV=1	Q	Secondary metabolites biosynthesis, transport and catabolism	uncharacterized protein LOC110759311 [Prunus avium]	--
PaF106G0800032650.01	PaF106G0800032650.01	0.13	0.2	0.24	1.02	1.39	1.09	-2.12	down	20	28	40	165	187	170	2.07e-15	down	down	down	1.09e-16	down	2.07e-15	-2.12484	down	[R]	General function prediction only	Biological Process: signal transduction (GO:0007165);; Molecular Function: ADP binding (GO:0043531);;	K00695|1.7e-117|mtr:MTR_6g478030|K00695 sucrose synthase [EC:2.4.1.13] | (RefSeq) sucrose synthase	Starch and sucrose metabolism (ko00500)	--	--	TIR domain	TMV resistance protein N OS=Nicotiana glutinosa OX=35889 GN=N PE=1 SV=1	S	Function unknown	PREDICTED: TMV resistance protein N-like [Prunus mume]	biological process: cellular process (GO:0009987);; biological process: biological regulation (GO:0065007);; molecular function: binding (GO:0005488)
PaF106G0700026835.01	PaF106G0700026835.01	2.78	5.6	2.91	18.79	7.74	8.76	-1.03	down	220	412	250	1612	555	729	0.00713515	down	down	down	0.00247676	down	0.00713515	-1.03271	down	[GI]	Carbohydrate transport and metabolism;; Lipid transport and metabolism	Molecular Function: enzyme inhibitor activity (GO:0004857);; Cellular Component: integral component of membrane (GO:0016021);; Molecular Function: pectinesterase activity (GO:0030599);; Biological Process: cell wall modification (GO:0042545);; Molecular Function: aspartyl esterase activity (GO:0045330);; Biological Process: pectin catabolic process (GO:0045490);;	K01051|1.9e-150|mus:103999194|K01051 pectinesterase [EC:3.1.1.11] | (RefSeq) pectinesterase-like	Pentose and glucuronate interconversions (ko00040)	--	--	Pectinesterase	Putative pectinesterase/pectinesterase inhibitor 45 OS=Arabidopsis thaliana OX=3702 GN=PME45 PE=2 SV=1	G	Carbohydrate transport and metabolism	PREDICTED: pectinesterase [Prunus mume]	biological process: biological regulation (GO:0065007);; molecular function: molecular function regulator (GO:0098772);; cellular component: membrane (GO:0016020);; cellular component: membrane part (GO:0044425);; molecular function: catalytic activity (GO:0003824);; biological process: cellular process (GO:0009987);; biological process: cellular component organization or biogenesis (GO:0071840);…
PaF106G0500018896.01	PaF106G0500018896.01	27.79	24.35	26.88	12.43	12.68	13.46	1.1	up	1424	1185	1503	692	585	727	6.39e-24	up	up	up	1.91e-25	up	6.39e-24	1.09952	up	[M]	Cell wall/membrane/envelope biogenesis	Molecular Function: oxidoreductase activity (GO:0016491);; Molecular Function: oxidoreductase activity, acting on the CH-OH group of donors, NAD or NADP as acceptor (GO:0016616);;	K09753|2.6e-27|ppp:112293893|K09753 cinnamoyl-CoA reductase [EC:1.2.1.44] | (RefSeq) cinnamoyl-CoA reductase 1-like	Phenylpropanoid biosynthesis (ko00940)	[V]	Defense mechanisms	--	Cinnamoyl-CoA reductase-like SNL6 OS=Oryza sativa subsp. japonica OX=39947 GN=SNL6 PE=3 SV=1	V	Defense mechanisms	unnamed protein product [Prunus armeniaca]	molecular function: catalytic activity (GO:0003824);; biological process: metabolic process (GO:0008152);; biological process: single-organism process (GO:0044699)
PaF106G0200007038.01	PaF106G0200007038.01	3.1	3.61	3.36	0.98	1.03	1.01	1.61	up	164	178	193	57	51	57	1.62e-12	up	up	up	1.08e-13	up	1.62e-12	1.60639	up	[M]	Cell wall/membrane/envelope biogenesis	Molecular Function: catalytic activity (GO:0003824);;	K09753|9.3e-72|psom:113329997|K09753 cinnamoyl-CoA reductase [EC:1.2.1.44] | (RefSeq) cinnamoyl-CoA reductase 1-like	Phenylpropanoid biosynthesis (ko00940)	[V]	Defense mechanisms	NAD dependent epimerase/dehydratase family	Phenylacetaldehyde reductase OS=Rosa hybrid cultivar OX=128735 GN=PAR PE=1 SV=1	V	Defense mechanisms	PREDICTED: cinnamoyl-CoA reductase 1-like [Prunus mume]	molecular function: catalytic activity (GO:0003824)
PaF106G0400015367.01	PaF106G0400015367.01	0.67	1.15	0.79	0.2	0.19	0.23	1.62	up	64	101	82	21	17	24	4.64e-07	up	up	up	6.46e-08	up	4.64e-07	1.62079	up	[IQR]	Lipid transport and metabolism;; Secondary metabolites biosynthesis, transport and catabolism;; General function prediction only	Cellular Component: membrane (GO:0016020);; Biological Process: oxidation-reduction process (GO:0055114);;	K15095|2.0e-190|mdm:103417586|K15095 (+)-neomenthol dehydrogenase [EC:1.1.1.208] | (RefSeq) (-)-isopiperitenone reductase-like	Monoterpenoid biosynthesis (ko00902)	[Q]	Secondary metabolites biosynthesis, transport and catabolism	short chain dehydrogenase	(+)-neomenthol dehydrogenase OS=Arabidopsis thaliana OX=3702 GN=SDR1 PE=1 SV=1	Q	Secondary metabolites biosynthesis, transport and catabolism	uncharacterized protein LOC18779716 isoform X2 [Prunus persica]	cellular component: membrane (GO:0016020);; biological process: metabolic process (GO:0008152);; biological process: single-organism process (GO:0044699)
PaF106G0800030242.01	PaF106G0800030242.01	12.81	10.68	11.47	2.01	1.57	3.35	1.97	up	156	120	143	27	18	41	5.56e-12	up	up	up	3.91e-13	up	5.56e-12	1.96859	up	[C]	Energy production and conversion	Molecular Function: FMN binding (GO:0010181);; Molecular Function: oxidoreductase activity (GO:0016491);;	K05894|2.8e-37|pavi:110750737|K05894 12-oxophytodienoic acid reductase [EC:1.3.1.42] | (RefSeq) 12-oxophytodienoate reductase 1-like	alpha-Linolenic acid metabolism (ko00592)	[CR]	Energy production and conversion;; General function prediction only	NADH:flavin oxidoreductase / NADH oxidase family	12-oxophytodienoate reductase 2 OS=Arabidopsis thaliana OX=3702 GN=OPR2 PE=1 SV=2	C	Energy production and conversion	PREDICTED: putative 12-oxophytodienoate reductase 11 [Prunus mume]	molecular function: binding (GO:0005488);; molecular function: catalytic activity (GO:0003824)
PaF106G0600023187.01	PaF106G0600023187.01	11.69	8.35	8.71	4.81	4.22	4.48	1.1	up	605	403	490	271	199	245	1.12e-09	up	up	up	1.05e-10	up	1.12e-09	1.09627	up	[I]	Lipid transport and metabolism	Molecular Function: hydrolase activity (GO:0016787);;	K20506|1.5e-43|egu:105060863|K20506 tuliposide A-converting enzyme [EC:4.2.99.22] | (RefSeq) tuliposide A-converting enzyme 2, chloroplastic-like	--	[V]	Defense mechanisms	alpha/beta hydrolase fold	Probable carboxylesterase 15 OS=Arabidopsis thaliana OX=3702 GN=CXE15 PE=2 SV=1	V	Defense mechanisms	unnamed protein product [Prunus armeniaca]	molecular function: catalytic activity (GO:0003824)
PaF106G0100006439.01	PaF106G0100006439.01	1.39	1.64	1.39	0.49	0.65	0.72	1.21	up	270	296	293	104	115	148	5.26e-09	up	up	up	5.39e-10	up	5.26e-09	1.20993	up	[R]	General function prediction only	Biological Process: signal transduction (GO:0007165);; Molecular Function: ADP binding (GO:0043531);;	K00695|4.7e-93|mtr:MTR_6g478030|K00695 sucrose synthase [EC:2.4.1.13] | (RefSeq) sucrose synthase	Starch and sucrose metabolism (ko00500)	--	--	NB-ARC domain	TMV resistance protein N OS=Nicotiana glutinosa OX=35889 GN=N PE=1 SV=1	T	Signal transduction mechanisms	TMV resistance protein N isoform X7 [Prunus persica]	biological process: cellular process (GO:0009987);; biological process: biological regulation (GO:0065007);; molecular function: binding (GO:0005488)
PaF106G0800032639.01	PaF106G0800032639.01	0.52	0.39	0.66	1.68	1.81	1.89	-1.53	down	67	47	93	236	212	256	2.49e-11	down	down	down	1.9e-12	down	2.49e-11	-1.52528	down	[R]	General function prediction only	Biological Process: signal transduction (GO:0007165);; Molecular Function: ADP binding (GO:0043531);;	K00695|7.2e-106|mtr:MTR_6g478030|K00695 sucrose synthase [EC:2.4.1.13] | (RefSeq) sucrose synthase	Starch and sucrose metabolism (ko00500)	--	--	TIR domain	TMV resistance protein N OS=Nicotiana glutinosa OX=35889 GN=N PE=1 SV=1	S	Function unknown	PREDICTED: TMV resistance protein N-like [Prunus mume]	biological process: cellular process (GO:0009987);; biological process: biological regulation (GO:0065007);; molecular function: binding (GO:0005488)
PaF106G0800032458.01	PaF106G0800032458.01	0.34	0.29	0.39	2.95	3.32	2.99	-2.73	down	61	49	76	478	485	529	8.94e-50	down	down	down	8.94e-52	down	8.94e-50	-2.73044	down	--	--	Biological Process: signal transduction (GO:0007165);; Molecular Function: ADP binding (GO:0043531);;	K00695|2.1e-110|mtr:MTR_6g478030|K00695 sucrose synthase [EC:2.4.1.13] | (RefSeq) sucrose synthase	Starch and sucrose metabolism (ko00500)	--	--	TIR domain	Disease resistance protein Roq1 OS=Nicotiana benthamiana OX=4100 GN=ROQ1 PE=1 SV=1	S	Function unknown	PREDICTED: TMV resistance protein N-like [Prunus mume]	biological process: cellular process (GO:0009987);; biological process: biological regulation (GO:0065007);; molecular function: binding (GO:0005488)
Prunus_sibirica_newGene_1338	--	1.16	1.28	0.98	0.03	0.02	0.02	4.17	up	226	234	208	7	5	5	1.7e-47	up	up	up	1.82e-49	up	1.7e-47	4.1749	up	--	--	Biological Process: signal transduction (GO:0007165);; Molecular Function: ADP binding (GO:0043531);;	K00695|2.1e-97|mtr:MTR_6g478030|K00695 sucrose synthase [EC:2.4.1.13] | (RefSeq) sucrose synthase	Starch and sucrose metabolism (ko00500)	--	--	TIR domain	Disease resistance protein Roq1 OS=Nicotiana benthamiana OX=4100 GN=ROQ1 PE=1 SV=1	S	Function unknown	PREDICTED: TMV resistance protein N-like [Prunus mume]	biological process: cellular process (GO:0009987);; biological process: biological regulation (GO:0065007);; molecular function: binding (GO:0005488)
Prunus_sibirica_newGene_1245	--	12.95	10.56	10.04	1.42	2.28	1.94	2.48	up	898	684	759	107	144	143	2.85e-42	up	up	up	3.69e-44	up	2.85e-42	2.4785	up	--	--	--	K12447|5.9e-59|csat:109127935|K12447 UDP-sugar pyrophosphorylase [EC:2.7.7.64] | (RefSeq) uncharacterized protein LOC109127935	Pentose and glucuronate interconversions (ko00040);; Galactose metabolism (ko00052);; Ascorbate and aldarate metabolism (ko00053);; Amino sugar and nucleotide sugar metabolism (ko00520)	[R]	General function prediction only	gag-polypeptide of LTR copia-type	--	L	Replication, recombination and repair	uncharacterized protein LOC109947549 isoform X1 [Prunus persica]	--
PaF106G0600025342.01	PaF106G0600025342.01	0.84	0.92	0.68	0	0	0	3.31	up	68	69	60	0	0	0	1.21e-19	up	up	up	4.7e-21	up	1.21e-19	3.31067	up	[GI]	Carbohydrate transport and metabolism;; Lipid transport and metabolism	Cellular Component: extracellular region (GO:0005576);; Cellular Component: cell wall (GO:0005618);; Cellular Component: integral component of membrane (GO:0016021);; Molecular Function: pectinesterase activity (GO:0030599);; Biological Process: cell wall modification (GO:0042545);; Molecular Function: aspartyl esterase activity (GO:0045330);; Biological Process: pectin catabolic process (GO:0045…	K01051|0.0e+00|pmum:103344536|K01051 pectinesterase [EC:3.1.1.11] | (RefSeq) putative pectinesterase/pectinesterase inhibitor 28	Pentose and glucuronate interconversions (ko00040)	--	--	Pectinesterase	Putative pectinesterase/pectinesterase inhibitor 28 OS=Arabidopsis thaliana OX=3702 GN=PME28 PE=2 SV=1	G	Carbohydrate transport and metabolism	unnamed protein product [Prunus armeniaca]	cellular component: extracellular region (GO:0005576);; cellular component: cell (GO:0005623);; cellular component: cell part (GO:0044464);; cellular component: membrane (GO:0016020);; cellular component: membrane part (GO:0044425);; molecular function: catalytic activity (GO:0003824);; biological process: cellular process (GO:0009987);; biological process: cellular component organization or biog…
PaF106G0800031260.01	PaF106G0800031260.01	0	0	0	0.64	0.43	0.56	-3.55	down	0	0	0	109	62	92	4.73e-23	down	down	down	1.53e-24	down	4.73e-23	-3.54899	down	--	--	Biological Process: signal transduction (GO:0007165);; Molecular Function: ADP binding (GO:0043531);;	K00695|1.1e-162|mtr:MTR_6g478030|K00695 sucrose synthase [EC:2.4.1.13] | (RefSeq) sucrose synthase	Starch and sucrose metabolism (ko00500)	--	--	TIR domain	TMV resistance protein N OS=Nicotiana glutinosa OX=35889 GN=N PE=1 SV=1	T	Signal transduction mechanisms	TMV resistance protein N [Prunus persica]	biological process: cellular process (GO:0009987);; biological process: biological regulation (GO:0065007);; molecular function: binding (GO:0005488)
PaF106G0800032607.01	PaF106G0800032607.01	0.09	0.23	0.32	0.6	0.78	0.57	-1.19	down	16	37	60	112	123	104	0.000347205	down	down	down	8.55e-05	down	0.000347205	-1.18544	down	[R]	General function prediction only	Biological Process: signal transduction (GO:0007165);; Molecular Function: ADP binding (GO:0043531);;	K00695|1.8e-123|mtr:MTR_6g478030|K00695 sucrose synthase [EC:2.4.1.13] | (RefSeq) sucrose synthase	Starch and sucrose metabolism (ko00500)	--	--	TIR domain	TMV resistance protein N OS=Nicotiana glutinosa OX=35889 GN=N PE=1 SV=1	S	Function unknown	PREDICTED: TMV resistance protein N-like [Prunus mume]	biological process: cellular process (GO:0009987);; biological process: biological regulation (GO:0065007);; molecular function: binding (GO:0005488)
PaF106G0800032548.01	PaF106G0800032548.01	0.28	0.47	0.34	0.09	0.06	0.04	1.76	up	44	68	59	15	9	6	9.82e-07	up	up	up	1.44e-07	up	9.82e-07	1.76057	up	--	--	Biological Process: signal transduction (GO:0007165);; Molecular Function: ADP binding (GO:0043531);;	K00695|3.6e-39|mtr:MTR_6g478030|K00695 sucrose synthase [EC:2.4.1.13] | (RefSeq) sucrose synthase	Starch and sucrose metabolism (ko00500)	--	--	Leucine rich repeat	TMV resistance protein N OS=Nicotiana glutinosa OX=35889 GN=N PE=1 SV=1	S	Function unknown	TMV resistance protein N isoform X1 [Prunus persica]	biological process: cellular process (GO:0009987);; biological process: biological regulation (GO:0065007);; molecular function: binding (GO:0005488)
PaF106G0800032651.01	PaF106G0800032651.01	2.26	2.55	2.5	0.7	0.87	1	1.48	up	364	383	437	122	128	170	6.27e-16	up	up	up	3.14e-17	up	6.27e-16	1.47866	up	[K]	Transcription	Biological Process: signal transduction (GO:0007165);; Molecular Function: ADP binding (GO:0043531);;	K00695|2.6e-119|mtr:MTR_6g478030|K00695 sucrose synthase [EC:2.4.1.13] | (RefSeq) sucrose synthase	Starch and sucrose metabolism (ko00500)	--	--	TIR domain	TMV resistance protein N OS=Nicotiana glutinosa OX=35889 GN=N PE=1 SV=1	S	Function unknown	PREDICTED: TMV resistance protein N-like [Prunus mume]	biological process: cellular process (GO:0009987);; biological process: biological regulation (GO:0065007);; molecular function: binding (GO:0005488)
PaF106G0800032549.01	PaF106G0800032549.01	0.47	0.44	0.57	0.1	0.11	0.13	1.7	up	75	66	99	17	17	22	6.61e-08	up	up	up	7.95e-09	up	6.61e-08	1.702	up	[R]	General function prediction only	Biological Process: signal transduction (GO:0007165);; Molecular Function: ADP binding (GO:0043531);;	K00695|6.6e-139|mtr:MTR_6g478030|K00695 sucrose synthase [EC:2.4.1.13] | (RefSeq) sucrose synthase	Starch and sucrose metabolism (ko00500)	--	--	TIR domain	TMV resistance protein N OS=Nicotiana glutinosa OX=35889 GN=N PE=1 SV=1	S	Function unknown	TMV resistance protein N isoform X1 [Prunus persica]	biological process: cellular process (GO:0009987);; biological process: biological regulation (GO:0065007);; molecular function: binding (GO:0005488)
PaF106G0800032652.01	PaF106G0800032652.01	2.11	2.9	2.3	0.01	0	0	5.85	up	383	491	455	2	0	0	4.11e-86	up	up	up	1.63e-88	up	4.11e-86	5.84896	up	[R]	General function prediction only	Biological Process: signal transduction (GO:0007165);; Molecular Function: ADP binding (GO:0043531);;	K00695|2.5e-129|mtr:MTR_6g478030|K00695 sucrose synthase [EC:2.4.1.13] | (RefSeq) sucrose synthase	Starch and sucrose metabolism (ko00500)	--	--	TIR domain	TMV resistance protein N OS=Nicotiana glutinosa OX=35889 GN=N PE=1 SV=1	S	Function unknown	PREDICTED: TMV resistance protein N-like [Prunus mume]	biological process: cellular process (GO:0009987);; biological process: biological regulation (GO:0065007);; molecular function: binding (GO:0005488)
PaF106G0400015835.01	PaF106G0400015835.01	0.88	2.64	2.26	0.47	0.17	0.48	1.61	up	42	117	117	25	8	25	7.67e-06	up	up	up	1.33e-06	up	7.67e-06	1.61231	up	[M]	Cell wall/membrane/envelope biogenesis	Molecular Function: catalytic activity (GO:0003824);;	K13082|2.7e-74|mesc:110605890|K13082 bifunctional dihydroflavonol 4-reductase/flavanone 4-reductase [EC:1.1.1.219 1.1.1.234] | (RefSeq) dihydroflavonol 4-reductase-like	Flavonoid biosynthesis (ko00941)	[V]	Defense mechanisms	NAD dependent epimerase/dehydratase family	Putative anthocyanidin reductase OS=Ginkgo biloba OX=3311 PE=2 SV=1	V	Defense mechanisms	unnamed protein product [Prunus armeniaca]	molecular function: catalytic activity (GO:0003824)
PaF106G0800031288.01	PaF106G0800031288.01	0.81	0.6	0.7	2.79	2.25	2.2	-1.58	down	120	84	113	451	304	344	3.4e-16	down	down	down	1.67e-17	down	3.4e-16	-1.57742	down	[R]	General function prediction only	Biological Process: signal transduction (GO:0007165);; Cellular Component: integral component of membrane (GO:0016021);; Molecular Function: ADP binding (GO:0043531);;	K00695|2.0e-174|mtr:MTR_6g478030|K00695 sucrose synthase [EC:2.4.1.13] | (RefSeq) sucrose synthase	Starch and sucrose metabolism (ko00500)	--	--	TIR domain	TMV resistance protein N OS=Nicotiana glutinosa OX=35889 GN=N PE=1 SV=1	T	Signal transduction mechanisms	TMV resistance protein N-like, partial [Prunus avium]	biological process: cellular process (GO:0009987);; biological process: biological regulation (GO:0065007);; cellular component: membrane (GO:0016020);; cellular component: membrane part (GO:0044425);; molecular function: binding (GO:0005488)
PaF106G0300010966.01	PaF106G0300010966.01	8.21	7.03	5.43	3.44	3.57	2.45	1.1	up	561	446	399	257	226	179	7.43e-08	up	up	up	9.02e-09	up	7.43e-08	1.09768	up	[T]	Signal transduction mechanisms	Molecular Function: protein serine/threonine kinase activity (GO:0004674);; Molecular Function: ATP binding (GO:0005524);;	K13430|9.4e-231|pmum:103330394|K13430 serine/threonine-protein kinase PBS1 [EC:2.7.11.1] | (RefSeq) serine/threonine-protein kinase PBS1	Plant-pathogen interaction (ko04626)	[T]	Signal transduction mechanisms	Protein kinase domain	Serine/threonine-protein kinase PBS1 OS=Arabidopsis thaliana OX=3702 GN=PBS1 PE=1 SV=1	T	Signal transduction mechanisms	unnamed protein product [Prunus armeniaca]	biological process: metabolic process (GO:0008152);; biological process: cellular process (GO:0009987);; molecular function: catalytic activity (GO:0003824);; molecular function: binding (GO:0005488)
PaF106G0200007549.01	PaF106G0200007549.01	0.08	0.12	0.15	0.54	0.67	0.87	-1.84	down	10	14	20	72	74	111	2.77e-08	down	down	down	3.14e-09	down	2.77e-08	-1.84273	down	--	--	Biological Process: signal transduction (GO:0007165);; Molecular Function: ADP binding (GO:0043531);;	K00695|2.9e-155|mtr:MTR_6g478030|K00695 sucrose synthase [EC:2.4.1.13] | (RefSeq) sucrose synthase	Starch and sucrose metabolism (ko00500)	--	--	TIR domain	TMV resistance protein N OS=Nicotiana glutinosa OX=35889 GN=N PE=1 SV=1	T	Signal transduction mechanisms	TMV resistance protein N-like isoform X3 [Prunus avium]	biological process: cellular process (GO:0009987);; biological process: biological regulation (GO:0065007);; molecular function: binding (GO:0005488)
PaF106G0600023222.01	PaF106G0600023222.01	4.32	5.67	7.04	1.52	2.39	2.31	1.35	up	192	234	338	75	96	108	1.15e-08	up	up	up	1.24e-09	up	1.15e-08	1.35287	up	[IQR]	Lipid transport and metabolism;; Secondary metabolites biosynthesis, transport and catabolism;; General function prediction only	--	K15095|2.5e-168|pmum:103330196|K15095 (+)-neomenthol dehydrogenase [EC:1.1.1.208] | (RefSeq) (+)-neomenthol dehydrogenase-like isoform X2	Monoterpenoid biosynthesis (ko00902)	[Q]	Secondary metabolites biosynthesis, transport and catabolism	short chain dehydrogenase	(+)-neomenthol dehydrogenase OS=Arabidopsis thaliana OX=3702 GN=SDR1 PE=1 SV=1	Q	Secondary metabolites biosynthesis, transport and catabolism	PREDICTED: (+)-neomenthol dehydrogenase-like isoform X1 [Prunus mume]	--
PaF106G0800032447.01	PaF106G0800032447.01	2.07	2.4	2.72	0.12	0.15	0.19	3.6	up	374	404	520	24	26	37	1.37e-64	up	up	up	8.39e-67	up	1.37e-64	3.59632	up	[R]	General function prediction only	Biological Process: signal transduction (GO:0007165);; Molecular Function: ADP binding (GO:0043531);;	K00695|8.3e-129|mtr:MTR_6g478030|K00695 sucrose synthase [EC:2.4.1.13] | (RefSeq) sucrose synthase	Starch and sucrose metabolism (ko00500)	--	--	TIR domain	Disease resistance protein Roq1 OS=Nicotiana benthamiana OX=4100 GN=ROQ1 PE=1 SV=1	S	Function unknown	PREDICTED: TMV resistance protein N-like [Prunus mume]	biological process: cellular process (GO:0009987);; biological process: biological regulation (GO:0065007);; molecular function: binding (GO:0005488)
PaF106G0100002664.01	PaF106G0100002664.01	0	0	0	3.99	3.39	2.76	-5.09	down	0	0	0	325	230	218	1.71e-56	down	down	down	1.36e-58	down	1.71e-56	-5.08924	down	--	--	Biological Process: defense response (GO:0006952);; Molecular Function: ADP binding (GO:0043531);;	K13457|1.8e-53|mtr:MTR_3g055830|K13457 disease resistance protein RPM1 | (RefSeq) disease resistance protein (CC-NBS-LRR class) family protein	Plant-pathogen interaction (ko04626)	[T]	Signal transduction mechanisms	Leucine Rich repeats (2 copies)	Probable disease resistance RPP8-like protein 2 OS=Arabidopsis thaliana OX=3702 GN=RPP8L2 PE=3 SV=1	T	Signal transduction mechanisms	PREDICTED: putative disease resistance protein At1g50180 [Prunus mume]	biological process: response to stimulus (GO:0050896);; molecular function: binding (GO:0005488)
PaF106G0800030239.01	PaF106G0800030239.01	12.26	11.41	9.21	3.11	2.34	3.16	1.71	up	197	174	161	57	36	55	6.27e-12	up	up	up	4.43e-13	up	6.27e-12	1.71282	up	[C]	Energy production and conversion	Molecular Function: FMN binding (GO:0010181);; Molecular Function: oxidoreductase activity (GO:0016491);;	K05894|5.5e-34|pmum:103319317|K05894 12-oxophytodienoic acid reductase [EC:1.3.1.42] | (RefSeq) 12-oxophytodienoate reductase 2-like	alpha-Linolenic acid metabolism (ko00592)	[CR]	Energy production and conversion;; General function prediction only	NADH:flavin oxidoreductase / NADH oxidase family	12-oxophytodienoate reductase 2 OS=Arabidopsis thaliana OX=3702 GN=OPR2 PE=1 SV=2	C	Energy production and conversion	unnamed protein product [Prunus armeniaca]	molecular function: binding (GO:0005488);; molecular function: catalytic activity (GO:0003824)
PaF106G0700026834.01	PaF106G0700026834.01	1.38	0.99	1.09	0	0	0	3.6	up	96	65	83	0	0	0	9.93e-24	up	up	up	3.02e-25	up	9.93e-24	3.59877	up	[GI]	Carbohydrate transport and metabolism;; Lipid transport and metabolism	Molecular Function: enzyme inhibitor activity (GO:0004857);; Molecular Function: pectinesterase activity (GO:0030599);; Biological Process: cell wall modification (GO:0042545);; Molecular Function: aspartyl esterase activity (GO:0045330);; Biological Process: pectin catabolic process (GO:0045490);;	K01051|1.1e-300|pmum:103340505|K01051 pectinesterase [EC:3.1.1.11] | (RefSeq) pectinesterase	Pentose and glucuronate interconversions (ko00040)	--	--	Pectinesterase	Probable pectinesterase/pectinesterase inhibitor 54 OS=Arabidopsis thaliana OX=3702 GN=PME54 PE=2 SV=1	G	Carbohydrate transport and metabolism	unnamed protein product [Prunus armeniaca]	biological process: biological regulation (GO:0065007);; molecular function: molecular function regulator (GO:0098772);; molecular function: catalytic activity (GO:0003824);; biological process: cellular process (GO:0009987);; biological process: cellular component organization or biogenesis (GO:0071840);; biological process: metabolic process (GO:0008152)
PaF106G0200010753.01	PaF106G0200010753.01	0.49	0.37	0.43	1.62	1.95	1.48	-1.49	down	29	20	27	99	99	88	7.19e-07	down	down	down	1.03e-07	down	7.19e-07	-1.489	down	--	--	Molecular Function: kinase activity (GO:0016301);;	--	--	[O]	Posttranslational modification, protein turnover, chaperones	--	Chaperone protein dnaJ 10 OS=Arabidopsis thaliana OX=3702 GN=ATJ10 PE=2 SV=2	S	Function unknown	putative aarF domain-containing protein kinase 2 isoform X3 [Prunus yedoensis var. nudiflora]	molecular function: catalytic activity (GO:0003824)
PaF106G0800030409.01	PaF106G0800030409.01	2.95	2.81	3.21	1.06	1.29	1.01	1.43	up	524	466	619	206	208	190	1.96e-21	up	up	up	6.95e-23	up	1.96e-21	1.428	up	[R]	General function prediction only	Biological Process: signal transduction (GO:0007165);; Molecular Function: ADP binding (GO:0043531);;	K00695|8.5e-98|mtr:MTR_6g478030|K00695 sucrose synthase [EC:2.4.1.13] | (RefSeq) sucrose synthase	Starch and sucrose metabolism (ko00500)	--	--	TIR domain	TMV resistance protein N OS=Nicotiana glutinosa OX=35889 GN=N PE=1 SV=1	T	Signal transduction mechanisms	PREDICTED: probable disease resistance protein RPP1 isoform X2 [Prunus mume]	biological process: cellular process (GO:0009987);; biological process: biological regulation (GO:0065007);; molecular function: binding (GO:0005488)
PaF106G0700027938.01	PaF106G0700027938.01	12.46	10.25	14.08	26.98	31.89	32.69	-1.21	down	891	684	1094	2099	2073	2465	5.03e-21	down	down	down	1.82e-22	down	5.03e-21	-1.20556	down	[R]	General function prediction only	Cellular Component: endoplasmic reticulum (GO:0005783);; Biological Process: auxin metabolic process (GO:0009850);; Molecular Function: IAA-Ala conjugate hydrolase activity (GO:0010179);; Molecular Function: hydrolase activity (GO:0016787);;	K14664|1.7e-246|pmum:103341727|K14664 IAA-amino acid hydrolase [EC:3.5.1.-] | (RefSeq) IAA-amino acid hydrolase ILR1-like	--	--	--	Peptidase family M20/M25/M40	IAA-amino acid hydrolase ILR1 OS=Arabidopsis thaliana OX=3702 GN=ILR1 PE=1 SV=2	S	Function unknown	PREDICTED: IAA-amino acid hydrolase ILR1-like [Prunus mume]	cellular component: cell (GO:0005623);; cellular component: organelle (GO:0043226);; cellular component: cell part (GO:0044464);; biological process: metabolic process (GO:0008152);; biological process: cellular process (GO:0009987);; biological process: biological regulation (GO:0065007);; molecular function: catalytic activity (GO:0003824)
PaF106G0100001879.01	PaF106G0100001879.01	0.25	0.17	0.32	2.71	2.59	2.53	-2.83	down	20	13	29	239	191	216	1.19e-28	down	down	down	2.63e-30	down	1.19e-28	-2.83359	down	--	--	--	K17710|1.2e-13|pavi:110744286|K17710 pentatricopeptide repeat domain-containing protein 1 | (RefSeq) pentatricopeptide repeat-containing protein At3g22470, mitochondrial-like	--	[R]	General function prediction only	PPR repeat family	Pentatricopeptide repeat-containing protein At3g22470, mitochondrial OS=Arabidopsis thaliana OX=3702 GN=At3g22470 PE=1 SV=1	--	--	PREDICTED: pentatricopeptide [Prunus dulcis]	--
PaF106G0600024743.01	PaF106G0600024743.01	18.02	20.8	24.47	9.54	7.69	7.01	1.41	up	1423	1532	2102	821	553	584	2.64e-26	up	up	up	6.95e-28	up	2.64e-26	1.40733	up	--	--	Molecular Function: transferase activity, transferring acyl groups other than amino-acyl groups (GO:0016747);;	K19747|7.1e-33|dosa:Os08t0562500-01|K19747 BAHD acyltransferase [EC:2.3.1.-] | (RefSeq) Os08g0562500; Transferase family protein.	--	--	--	Transferase family	BAHD acyltransferase DCR OS=Arabidopsis thaliana OX=3702 GN=DCR PE=2 SV=1	S	Function unknown	unnamed protein product [Prunus armeniaca]	molecular function: catalytic activity (GO:0003824)
PaF106G0400014852.01	PaF106G0400014852.01	4.66	4.93	5.27	0.1	0.15	0.21	4.89	up	796	783	973	18	24	26	1.38e-144	up	up	up	1.84e-147	up	1.38e-144	4.88581	up	[R]	General function prediction only	Biological Process: signal transduction (GO:0007165);; Molecular Function: ADP binding (GO:0043531);;	K00695|2.5e-161|mtr:MTR_6g478030|K00695 sucrose synthase [EC:2.4.1.13] | (RefSeq) sucrose synthase	Starch and sucrose metabolism (ko00500)	--	--	TIR domain	Disease resistance protein Roq1 OS=Nicotiana benthamiana OX=4100 GN=ROQ1 PE=1 SV=1	--	--	PREDICTED: disease resistance protein TAO1-like [Prunus mume]	biological process: cellular process (GO:0009987);; biological process: biological regulation (GO:0065007);; molecular function: binding (GO:0005488)
PaF106G0200009093.01	PaF106G0200009093.01	105.48	144.81	148.81	61.23	66.16	73.6	1.03	up	2572	3292	3944	1625	1467	1893	8.31e-16	up	up	up	4.19e-17	up	8.31e-16	1.02601	up	--	--	Cellular Component: cytosol (GO:0005829);; Biological Process: response to desiccation (GO:0009269);;	--	--	--	--	Late embryogenesis abundant protein	Desiccation protectant protein Lea14 homolog OS=Glycine max OX=3847 PE=2 SV=1	S	Function unknown	unnamed protein product [Prunus armeniaca]	cellular component: cell (GO:0005623);; cellular component: cell part (GO:0044464);; biological process: response to stimulus (GO:0050896)
PaF106G0100004696.01	PaF106G0100004696.01	10.06	10.71	10.32	1.26	1.59	1.11	2.94	up	1338	1327	1484	182	194	156	8.99e-111	up	up	up	2.08e-113	up	8.99e-111	2.94318	up	[ET]	Amino acid transport and metabolism;; Signal transduction mechanisms	Molecular Function: ligand-gated ion channel activity (GO:0015276);; Cellular Component: integral component of membrane (GO:0016021);;	K05387|0.0e+00|pmum:103320680|K05387 glutamate receptor, ionotropic, plant | (RefSeq) glutamate receptor 2.8-like	--	[PET]	Inorganic ion transport and metabolism;; Amino acid transport and metabolism;; Signal transduction mechanisms	Ligand-gated ion channel	Glutamate receptor 2.8 OS=Arabidopsis thaliana OX=3702 GN=GLR2.8 PE=2 SV=2	--	--	unnamed protein product [Prunus armeniaca]	biological process: localization (GO:0051179);; molecular function: transporter activity (GO:0005215);; molecular function: molecular transducer activity (GO:0060089);; cellular component: membrane (GO:0016020);; cellular component: membrane part (GO:0044425)
PaF106G0700026837.01	PaF106G0700026837.01	38.72	40.54	40.47	16	14.31	14.62	1.38	up	2566	2456	2940	1213	933	1080	1.45e-62	up	up	up	9.12e-65	up	1.45e-62	1.37608	up	[GI]	Carbohydrate transport and metabolism;; Lipid transport and metabolism	Cellular Component: extracellular region (GO:0005576);; Cellular Component: cell wall (GO:0005618);; Molecular Function: pectinesterase activity (GO:0030599);; Biological Process: cell wall modification (GO:0042545);; Molecular Function: aspartyl esterase activity (GO:0045330);; Biological Process: pectin catabolic process (GO:0045490);; Molecular Function: pectinesterase inhibitor activity (GO:0…	K01051|6.8e-298|pmum:103340502|K01051 pectinesterase [EC:3.1.1.11] | (RefSeq) pectinesterase/pectinesterase inhibitor PPE8B	Pentose and glucuronate interconversions (ko00040)	--	--	Pectinesterase	Pectinesterase/pectinesterase inhibitor PPE8B OS=Prunus persica OX=3760 PE=2 SV=1	G	Carbohydrate transport and metabolism	unnamed protein product [Prunus armeniaca]	cellular component: extracellular region (GO:0005576);; cellular component: cell (GO:0005623);; cellular component: cell part (GO:0044464);; molecular function: catalytic activity (GO:0003824);; biological process: cellular process (GO:0009987);; biological process: cellular component organization or biogenesis (GO:0071840);; biological process: metabolic process (GO:0008152);; biological process…
PaF106G0600022445.01	PaF106G0600022445.01	0	0	0	1.37	2.06	1.77	-4.08	down	0	0	0	108	135	134	4.02e-32	down	down	down	7.71e-34	down	4.02e-32	-4.08299	down	--	--	--	--	--	[R]	General function prediction only	PPR repeat	Pentatricopeptide repeat-containing protein At3g22470, mitochondrial OS=Arabidopsis thaliana OX=3702 GN=At3g22470 PE=1 SV=1	--	--	pentatricopeptide repeat-containing protein [Prunus yedoensis var. nudiflora]	--
PaF106G0100006388.01	PaF106G0100006388.01	3.95	4.65	4.6	2.1	1.52	1.56	1.36	up	648	713	822	375	228	271	2.57e-19	up	up	up	1.02e-20	up	2.57e-19	1.35846	up	[R]	General function prediction only	Biological Process: signal transduction (GO:0007165);; Molecular Function: ADP binding (GO:0043531);;	K00695|5.2e-84|mtr:MTR_6g478030|K00695 sucrose synthase [EC:2.4.1.13] | (RefSeq) sucrose synthase	Starch and sucrose metabolism (ko00500)	--	--	NB-ARC domain	TMV resistance protein N OS=Nicotiana glutinosa OX=35889 GN=N PE=1 SV=1	T	Signal transduction mechanisms	TMV resistance protein N [Prunus persica]	biological process: cellular process (GO:0009987);; biological process: biological regulation (GO:0065007);; molecular function: binding (GO:0005488)
PaF106G0700027562.01	PaF106G0700027562.01	24.04	26.19	28.49	12.77	10.02	10.31	1.29	up	1419	1441	1828	820	538	642	1.97e-28	up	up	up	4.45e-30	up	1.97e-28	1.28801	up	--	--	Molecular Function: transferase activity, transferring acyl groups other than amino-acyl groups (GO:0016747);;	K19747|1.1e-62|peq:110025140|K19747 BAHD acyltransferase [EC:2.3.1.-] | (RefSeq) BAHD acyltransferase DCR	--	--	--	Transferase family	Uncharacterized acetyltransferase At3g50280 OS=Arabidopsis thaliana OX=3702 GN=At3g50280 PE=3 SV=1	S	Function unknown	unnamed protein product [Prunus armeniaca]	molecular function: catalytic activity (GO:0003824)
PaF106G0800032875.01	PaF106G0800032875.01	0.7	0.82	0.92	0	0.06	0.03	3.18	up	88	96	127	0	7	4	9.75e-21	up	up	up	3.57e-22	up	9.75e-21	3.17621	up	[R]	General function prediction only	Biological Process: signal transduction (GO:0007165);; Molecular Function: ADP binding (GO:0043531);;	K00695|9.4e-125|mtr:MTR_6g478030|K00695 sucrose synthase [EC:2.4.1.13] | (RefSeq) sucrose synthase	Starch and sucrose metabolism (ko00500)	--	--	TIR domain	Disease resistance protein RUN1 OS=Vitis rotundifolia OX=103349 GN=RUN1 PE=1 SV=1	S	Function unknown	TMV resistance protein N isoform X1 [Prunus persica]	biological process: cellular process (GO:0009987);; biological process: biological regulation (GO:0065007);; molecular function: binding (GO:0005488)
PaF106G0100006392.01	PaF106G0100006392.01	8.21	8.44	8.08	0.58	0.83	0.54	3.36	up	1148	1092	1153	101	121	91	9.63e-106	up	up	up	2.73e-108	up	9.63e-106	3.35661	up	--	--	--	--	--	--	--	Leucine Rich repeats (2 copies)	--	S	Function unknown	uncharacterized protein LOC18792641 [Prunus persica]	--
Prunus_sibirica_newGene_1975	--	7.9	9.26	10.15	1.91	2.24	2.32	1.32	up	485	495	617	187	207	250	1.39e-15	up	up	up	7.16e-17	up	1.39e-15	1.31691	up	[R]	General function prediction only	Biological Process: signal transduction (GO:0007165);; Molecular Function: ADP binding (GO:0043531);;	K00695|3.8e-47|mtr:MTR_6g478030|K00695 sucrose synthase [EC:2.4.1.13] | (RefSeq) sucrose synthase	Starch and sucrose metabolism (ko00500)	--	--	NB-ARC domain	Disease resistance protein RPV1 OS=Vitis rotundifolia OX=103349 GN=RPV1 PE=1 SV=1	T	Signal transduction mechanisms	TMV resistance protein N isoform X2 [Prunus persica]	biological process: cellular process (GO:0009987);; biological process: biological regulation (GO:0065007);; molecular function: binding (GO:0005488)
PaF106G0800032449.01	PaF106G0800032449.01	0.1	0.2	0.16	1.5	1.52	1.38	-2.76	down	16	28	27	250	210	223	1.17e-28	down	down	down	2.58e-30	down	1.17e-28	-2.75583	down	[R]	General function prediction only	Biological Process: signal transduction (GO:0007165);; Molecular Function: ADP binding (GO:0043531);;	K00695|3.6e-129|mtr:MTR_6g478030|K00695 sucrose synthase [EC:2.4.1.13] | (RefSeq) sucrose synthase	Starch and sucrose metabolism (ko00500)	--	--	TIR domain	Disease resistance protein Roq1 OS=Nicotiana benthamiana OX=4100 GN=ROQ1 PE=1 SV=1	S	Function unknown	PREDICTED: TMV resistance protein N-like [Prunus mume]	biological process: cellular process (GO:0009987);; biological process: biological regulation (GO:0065007);; molecular function: binding (GO:0005488)
PaF106G0100004453.01	PaF106G0100004453.01	28.33	29.86	32.81	66.81	63.67	64.2	-1.01	down	1659	1631	2089	4259	3392	3967	4.16e-38	down	down	down	6.28e-40	down	4.16e-38	-1.01342	down	[M]	Cell wall/membrane/envelope biogenesis	Molecular Function: catalytic activity (GO:0003824);;	K13082|9.0e-198|pper:18788884|K13082 bifunctional dihydroflavonol 4-reductase/flavanone 4-reductase [EC:1.1.1.219 1.1.1.234] | (RefSeq) bifunctional dihydroflavonol 4-reductase/flavanone 4-reductase	Flavonoid biosynthesis (ko00941)	[V]	Defense mechanisms	NAD dependent epimerase/dehydratase family	Bifunctional dihydroflavonol 4-reductase/flavanone 4-reductase OS=Pyrus communis OX=23211 GN=DFR PE=1 SV=1	V	Defense mechanisms	unnamed protein product [Prunus armeniaca]	molecular function: catalytic activity (GO:0003824)
PaF106G0800032310.01	PaF106G0800032310.01	3.3	3.29	3.97	1.43	1.7	1.46	1.23	up	607	564	795	286	285	284	2.24e-18	up	up	up	9.42e-20	up	2.24e-18	1.22894	up	[R]	General function prediction only	Biological Process: signal transduction (GO:0007165);; Cellular Component: integral component of membrane (GO:0016021);; Molecular Function: ADP binding (GO:0043531);;	K00695|3.3e-133|mtr:MTR_6g478030|K00695 sucrose synthase [EC:2.4.1.13] | (RefSeq) sucrose synthase	Starch and sucrose metabolism (ko00500)	--	--	TIR domain	TMV resistance protein N OS=Nicotiana glutinosa OX=35889 GN=N PE=1 SV=1	S	Function unknown	TMV resistance protein N-like [Prunus dulcis]	biological process: cellular process (GO:0009987);; biological process: biological regulation (GO:0065007);; cellular component: membrane (GO:0016020);; cellular component: membrane part (GO:0044425);; molecular function: binding (GO:0005488)
PaF106G0700028794.01	PaF106G0700028794.01	6.29	5.98	5.82	3.17	2.15	3.07	1.09	up	591	522	582	329	188	304	1.76e-10	up	up	up	1.49e-11	up	1.76e-10	1.09038	up	--	--	Molecular Function: aspartic-type endopeptidase activity (GO:0004190);;	K00924|6.2e-35|dzi:111303759|K00924 kinase [EC:2.7.1.-] | (RefSeq) aspartic proteinase-like protein 2	--	[O]	Posttranslational modification, protein turnover, chaperones	Xylanase inhibitor N-terminal	Aspartic proteinase Asp1 OS=Oryza sativa subsp. japonica OX=39947 GN=ASP1 PE=2 SV=1	O	Posttranslational modification, protein turnover, chaperones	LOW QUALITY PROTEIN: aspartic proteinase Asp1 [Prunus persica]	biological process: metabolic process (GO:0008152);; molecular function: catalytic activity (GO:0003824)
PaF106G0800032374.01	PaF106G0800032374.01	1.53	1.9	1.62	0.73	0.77	0.82	1.12	up	278	322	320	144	128	157	1.24e-09	up	up	up	1.17e-10	up	1.24e-09	1.11911	up	--	--	Biological Process: signal transduction (GO:0007165);; Molecular Function: ADP binding (GO:0043531);;	K00695|9.5e-128|mtr:MTR_6g478030|K00695 sucrose synthase [EC:2.4.1.13] | (RefSeq) sucrose synthase	Starch and sucrose metabolism (ko00500)	--	--	TIR domain	TMV resistance protein N OS=Nicotiana glutinosa OX=35889 GN=N PE=1 SV=1	S	Function unknown	PREDICTED: TMV resistance protein N-like [Prunus mume]	biological process: cellular process (GO:0009987);; biological process: biological regulation (GO:0065007);; molecular function: binding (GO:0005488)
PaF106G0200007693.01	PaF106G0200007693.01	0	0	0	2.1	2.29	1.92	-4.82	down	0	0	0	216	197	192	2.36e-49	down	down	down	2.4e-51	down	2.36e-49	-4.81949	down	--	--	--	K12447|4.0e-13|csat:109127935|K12447 UDP-sugar pyrophosphorylase [EC:2.7.7.64] | (RefSeq) uncharacterized protein LOC109127935	Pentose and glucuronate interconversions (ko00040);; Galactose metabolism (ko00052);; Ascorbate and aldarate metabolism (ko00053);; Amino sugar and nucleotide sugar metabolism (ko00520)	[R]	General function prediction only	--	--	L	Replication, recombination and repair	uncharacterized protein LOC109949182 [Prunus persica]	--
PaF106G0400014754.01	PaF106G0400014754.01	53.04	57.56	61.78	18.19	23.97	26.67	1.35	up	2395	2423	3032	894	984	1271	6.53e-24	up	up	up	1.95e-25	up	6.53e-24	1.34725	up	--	--	Molecular Function: DNA binding (GO:0003677);; Cellular Component: nucleus (GO:0005634);; Biological Process: regulation of transcription, DNA-templated (GO:0006355);;	K00521|1.1e-44|cmos:111447866|K00521 ferric-chelate reductase [EC:1.16.1.7] | (RefSeq) ferric reduction oxidase 7, chloroplastic-like	--	--	--	No apical meristem (NAM) protein	Protein ATAF2 OS=Arabidopsis thaliana OX=3702 GN=NAC081 PE=1 SV=1	K	Transcription	unnamed protein product [Prunus armeniaca]	molecular function: binding (GO:0005488);; cellular component: cell (GO:0005623);; cellular component: organelle (GO:0043226);; cellular component: cell part (GO:0044464);; biological process: biological regulation (GO:0065007)
PaF106G0200008699.01	PaF106G0200008699.01	2.19	2.13	2.3	6.75	4.87	4.05	-1.06	down	119	108	136	398	240	231	1.41e-06	down	down	down	2.13e-07	down	1.41e-06	-1.05905	down	[M]	Cell wall/membrane/envelope biogenesis	Molecular Function: oxidoreductase activity (GO:0016491);; Molecular Function: oxidoreductase activity, acting on the CH-OH group of donors, NAD or NADP as acceptor (GO:0016616);;	K13265|7.4e-117|gmx:100793687|K13265 vestitone reductase [EC:1.1.1.348] | (RefSeq) uncharacterized protein LOC100793687	Isoflavonoid biosynthesis (ko00943)	[V]	Defense mechanisms	NAD dependent epimerase/dehydratase family	Vestitone reductase OS=Medicago sativa OX=3879 PE=1 SV=1	V	Defense mechanisms	unnamed protein product [Prunus armeniaca]	molecular function: catalytic activity (GO:0003824);; biological process: metabolic process (GO:0008152);; biological process: single-organism process (GO:0044699)
PaF106G0300014581.01	PaF106G0300014581.01	141.42	160.17	114.35	67.07	31.1	33.88	1.33	up	13024	13754	11448	6722	2605	3292	6.69e-05	up	up	up	1.4e-05	up	6.69e-05	1.32811	up	[GI]	Carbohydrate transport and metabolism;; Lipid transport and metabolism	Molecular Function: enzyme inhibitor activity (GO:0004857);; Cellular Component: integral component of membrane (GO:0016021);; Molecular Function: pectinesterase activity (GO:0030599);; Biological Process: cell wall modification (GO:0042545);; Molecular Function: aspartyl esterase activity (GO:0045330);; Biological Process: pectin catabolic process (GO:0045490);;	K01051|0.0e+00|pmum:103327267|K01051 pectinesterase [EC:3.1.1.11] | (RefSeq) pectinesterase	Pentose and glucuronate interconversions (ko00040)	--	--	Pectinesterase	Pectinesterase 4 OS=Arabidopsis thaliana OX=3702 GN=PME4 PE=2 SV=1	G	Carbohydrate transport and metabolism	unnamed protein product [Prunus armeniaca]	biological process: biological regulation (GO:0065007);; molecular function: molecular function regulator (GO:0098772);; cellular component: membrane (GO:0016020);; cellular component: membrane part (GO:0044425);; molecular function: catalytic activity (GO:0003824);; biological process: cellular process (GO:0009987);; biological process: cellular component organization or biogenesis (GO:0071840);…
PaF106G0700028366.01	PaF106G0700028366.01	0.57	0.75	0.37	0	0	0	3.1	up	63	78	45	0	0	0	5.67e-17	up	up	up	2.62e-18	up	5.67e-17	3.10305	up	--	--	Biological Process: signal transduction (GO:0007165);; Molecular Function: ADP binding (GO:0043531);;	K00695|6.2e-64|mtr:MTR_6g478030|K00695 sucrose synthase [EC:2.4.1.13] | (RefSeq) sucrose synthase	Starch and sucrose metabolism (ko00500)	--	--	NB-ARC domain	TMV resistance protein N OS=Nicotiana glutinosa OX=35889 GN=N PE=1 SV=1	S	Function unknown	PREDICTED: TMV resistance protein N-like [Prunus mume]	biological process: cellular process (GO:0009987);; biological process: biological regulation (GO:0065007);; molecular function: binding (GO:0005488)
PaF106G0800030484.01	PaF106G0800030484.01	1.43	1.64	2.3	5.76	5.03	4.07	-1.22	down	56	60	97	242	177	166	5.33e-07	down	down	down	7.48e-08	down	5.33e-07	-1.22483	down	--	--	Molecular Function: DNA binding (GO:0003677);; Cellular Component: nucleus (GO:0005634);; Biological Process: regulation of transcription, DNA-templated (GO:0006355);;	K00521|7.9e-46|cmos:111447866|K00521 ferric-chelate reductase [EC:1.16.1.7] | (RefSeq) ferric reduction oxidase 7, chloroplastic-like	--	--	--	No apical meristem (NAM) protein	NAC domain-containing protein 6 OS=Glycine max OX=3847 GN=NAC6 PE=2 SV=1	K	Transcription	unnamed protein product [Prunus armeniaca]	molecular function: binding (GO:0005488);; cellular component: cell (GO:0005623);; cellular component: organelle (GO:0043226);; cellular component: cell part (GO:0044464);; biological process: biological regulation (GO:0065007)
PaF106G0100001865.01	PaF106G0100001865.01	5.62	8.29	6.82	3.56	4.02	3.57	1.09	up	335	414	431	198	198	165	1.8e-09	up	up	up	1.73e-10	up	1.8e-09	1.08781	up	--	--	--	K17710|3.5e-24|pmum:103322703|K17710 pentatricopeptide repeat domain-containing protein 1 | (RefSeq) pentatricopeptide repeat-containing protein At1g62930, chloroplastic-like	--	--	--	PPR repeat family	--	--	--	pentatricopeptide repeat-containing protein [Prunus yedoensis var. nudiflora]	--
PaF106G0200006841.01	PaF106G0200006841.01	35.14	33.47	38.26	7.33	7.23	5.91	2.43	up	2656	2355	3120	589	484	473	1.02e-136	up	up	up	1.68e-139	up	1.02e-136	2.43327	up	[G]	Carbohydrate transport and metabolism	Biological Process: carbohydrate metabolic process (GO:0005975);; Molecular Function: beta-glucosidase activity (GO:0008422);;	K22279|2.4e-303|pmum:103330511|K22279 vicianin beta-glucosidase [EC:3.2.1.119] | (RefSeq) vicianin hydrolase isoform X1	--	[G]	Carbohydrate transport and metabolism	Glycosyl hydrolase family 1	Vicianin hydrolase (Fragment) OS=Vicia sativa subsp. nigra OX=3909 PE=1 SV=1	G	Carbohydrate transport and metabolism	PREDICTED: vicianin hydrolase isoform X1 [Prunus mume]	biological process: metabolic process (GO:0008152);; molecular function: catalytic activity (GO:0003824)
PaF106G0500019363.01	PaF106G0500019363.01	0.39	0.24	0.22	8.27	9.86	7.54	-4.5	down	57	33	35	1314	1308	1162	1.37e-134	down	down	down	2.4e-137	down	1.37e-134	-4.49668	down	[R]	General function prediction only	Biological Process: signal transduction (GO:0007165);; Molecular Function: ADP binding (GO:0043531);;	K00695|8.0e-168|mtr:MTR_6g478030|K00695 sucrose synthase [EC:2.4.1.13] | (RefSeq) sucrose synthase	Starch and sucrose metabolism (ko00500)	--	--	TIR domain	Disease resistance protein RPV1 OS=Vitis rotundifolia OX=103349 GN=RPV1 PE=1 SV=1	T	Signal transduction mechanisms	PREDICTED: TMV resistance protein N-like isoform X1 [Prunus mume]	biological process: cellular process (GO:0009987);; biological process: biological regulation (GO:0065007);; molecular function: binding (GO:0005488)
PaF106G0100005726.01	PaF106G0100005726.01	43.37	46.59	41.19	22.1	20.86	22.13	1.07	up	3546	3552	3661	1967	1551	1909	1.3e-31	up	up	up	2.54e-33	up	1.3e-31	1.06769	up	[R]	General function prediction only	Molecular Function: hydrolase activity (GO:0016787);;	K21604|5.3e-273|pmum:103319809|K21604 jasmonoyl-L-amino acid hydrolase [EC:3.5.1.127] | (RefSeq) IAA-amino acid hydrolase ILR1-like 6	--	--	--	Peptidase family M20/M25/M40	IAA-amino acid hydrolase ILR1-like 6 OS=Arabidopsis thaliana OX=3702 GN=ILL6 PE=1 SV=2	S	Function unknown	unnamed protein product [Prunus armeniaca]	molecular function: catalytic activity (GO:0003824)
PaF106G0400015614.01	PaF106G0400015614.01	0	0	0	2.36	2.87	2.67	-4.74	down	0	0	0	185	188	203	4.16e-47	down	down	down	4.5e-49	down	4.16e-47	-4.73806	down	--	--	Molecular Function: protein binding (GO:0005515);;	K04079|5.4e-13|pvu:PHAVU_006G031400g|K04079 molecular chaperone HtpG | (RefSeq) hypothetical protein	Protein processing in endoplasmic reticulum (ko04141);; Plant-pathogen interaction (ko04626)	--	--	F-box domain	F-box/kelch-repeat protein At3g23880 OS=Arabidopsis thaliana OX=3702 GN=At3g23880 PE=2 SV=1	S	Function unknown	F-box/kelch-repeat protein At3g23880-like [Prunus dulcis]	molecular function: binding (GO:0005488)
PaF106G0100006559.01	PaF106G0100006559.01	1.1	0.79	0.78	0.31	0.37	0.22	1.19	up	65	44	50	20	20	14	0.000753697	up	up	up	0.000201294	up	0.000753697	1.19308	up	--	--	--	K08955|3.5e-10|mtr:MTR_5g074850|K08955 ATP-dependent metalloprotease [EC:3.4.24.-] | (RefSeq) FTSH protease	--	--	--	F-box associated	F-box protein At3g07870 OS=Arabidopsis thaliana OX=3702 GN=At3g07870 PE=2 SV=1	S	Function unknown	unnamed protein product [Prunus armeniaca]	--
			上调	24
			下调	13
			未表达	4
