# Supplementary material for: Mining for genes related to pistil abortion in Prunus sibirica L
Source: PeerJ. 2022 Nov 15;10:e14366. doi: 10.7717/peerj.14366 (PMC9673769; doi:10.7717/peerj.14366)
Supplement: Table S15 [file peerj-10-14366-s015.xls]

## Sheet: Sheet1
Table S15 The DEGs in bHLH transcription factor family
#ID	gene_name	APt1_FPKM	APt1_count	APt2_FPKM	APt2_count	APt3_FPKM	APt3_count	NPt1_FPKM	NPt1_count	NPt2_FPKM	NPt2_count	NPt3_FPKM	NPt3_count	NPt1_NPt2_NPt3_vs_APt1_APt2_APt3_DESeq2_FDR	NPt1_NPt2_NPt3_vs_APt1_APt2_APt3_DESeq2_log2FC	NPt1_NPt2_NPt3_vs_APt1_APt2_APt3_DESeq2_(FDR_0.01_FC_2)_regulated	NPt1_NPt2_NPt3_vs_APt1_APt2_APt3_DESeq2_(FDR_0.05_FC_2)_regulated	NPt1_NPt2_NPt3_vs_APt1_APt2_APt3_DESeq2_(FDR_0.05_FC_1.5)_regulated	NPt1_NPt2_NPt3_vs_APt1_APt2_APt3_DESeq2_(FDR_0.05_FC_1)_regulated	NPt1_NPt2_NPt3_vs_APt1_APt2_APt3_DESeq2_Pvalue	NPt1_NPt2_NPt3_vs_APt1_APt2_APt3_DESeq2_(Pvalue_0.05_FC_2)_regulated	NPt1_NPt2_NPt3_vs_APt3_APt2_APt1_DESeq2_FDR	NPt1_NPt2_NPt3_vs_APt3_APt2_APt1_DESeq2_log2FC	NPt1_NPt2_NPt3_vs_APt3_APt2_APt1_DESeq2_(FDR_0.05_FC_2)_regulated	COG_class	COG_class_annotation	GO_annotation	KEGG_annotation	KEGG_pathway_annotation	KOG_class	KOG_class_annotation	Pfam_annotation	Swiss_Prot_annotation	eggNOG_class	eggNOG_class_annotation	NR_annotation	GO_second_level_annotation
PaF106G0200007416.01	PaF106G0200007416.01	0.403187	38	1.09771	96	0.903871	92	2.26036	229	2.47172	209	1.57259	155	0.000209335	-1.09109	down	down	down	down	4.91474e-05	down	0.000209335	-1.09109	down	--		Molecular Function: protein kinase activity (GO:0004672);; Molecular Function: ATP binding (GO:0005524);; Cellular Component: integral component of membrane (GO:0016021);; Molecular Function: polysaccharide binding (GO:0030247);;	K13430|4.1e-48|dct:110098817|K13430 serine/threonine-protein kinase PBS1 [EC:2.7.11.1] | (RefSeq) probable serine/threonine-protein kinase PBL7	Plant-pathogen interaction (ko04626)	[T]	Signal transduction mechanisms	Protein kinase domain	Rust resistance kinase Lr10 OS=Triticum aestivum OX=4565 GN=LRK10 PE=2 SV=1	T	Signal transduction mechanisms	PREDICTED: rust resistance kinase Lr10-like [Prunus mume]	biological process: metabolic process (GO:0008152);; biological process: cellular process (GO:0009987);; molecular function: catalytic activity (GO:0003824);; molecular function: binding (GO:0005488);; cellular component: membrane (GO:0016020);; cellular component: membrane part (GO:0044425)
PaF106G0700026042.01	PaF106G0700026042.01	7.64581	769	7.36401	673	7.05926	770	24.1842	2645	21.1075	1932	23.4892	2509	1.8546e-50	-1.55099	down	down	down	down	1.8055e-52	down	1.8546e-50	-1.55099	down	[T]	Signal transduction mechanisms	Molecular Function: protein serine/threonine kinase activity (GO:0004674);; Molecular Function: ATP binding (GO:0005524);; Cellular Component: plasma membrane (GO:0005886);; Biological Process: carbohydrate metabolic process (GO:0005975);; Biological Process: protein phosphorylation (GO:0006468);; Molecular Function: chitin binding (GO:0008061);; Cellular Component: integral component of membrane…	K01183|1.9e-83|nsy:104241083|K01183 chitinase [EC:3.2.1.14] | (RefSeq) chitinase-3-like protein 2	Amino sugar and nucleotide sugar metabolism (ko00520)	--	--	Protein tyrosine and serine/threonine kinase	G-type lectin S-receptor-like serine/threonine-protein kinase At1g11330 OS=Arabidopsis thaliana OX=3702 GN=At1g11330 PE=1 SV=3	T	Signal transduction mechanisms	PREDICTED: cysteine-rich receptor-like protein kinase 5 isoform X1 [Prunus mume]	biological process: metabolic process (GO:0008152);; biological process: cellular process (GO:0009987);; molecular function: catalytic activity (GO:0003824);; molecular function: binding (GO:0005488);; cellular component: cell (GO:0005623);; cellular component: membrane (GO:0016020);; cellular component: cell part (GO:0044464);; cellular component: membrane part (GO:0044425)
PaF106G0500019697.01	PaF106G0500019697.01	2.32373	250	2.87566	284	3.31259	387	8.97415	1045	7.89256	770	6.9062	782	7.07859e-20	-1.35423	down	down	down	down	2.72001e-21	down	7.07859e-20	-1.35423	down	--	--	Molecular Function: protein dimerization activity (GO:0046983);;	K13422|2.7e-38|egr:104445939|K13422 transcription factor MYC2 | (RefSeq) transcription factor MYC2	MAPK signaling pathway - plant (ko04016);; Plant hormone signal transduction (ko04075)	--	--	bHLH-MYC and R2R3-MYB transcription factors N-terminal	Transcription factor GLABRA 3 OS=Arabidopsis thaliana OX=3702 GN=GL3 PE=1 SV=1	K	Transcription	unnamed protein product [Prunus armeniaca]	molecular function: binding (GO:0005488)
PaF106G0600023075.01	PaF106G0600023075.01	1.57841	57	6.35749	214	3.1773	125	20.4624	803	30.0701	986	24.9976	951	1.62063e-05	-1.63785	down	down	down	down	3.00949e-06	down	1.62063e-05	-1.63785	down	[IQR]	Lipid transport and metabolism;; Secondary metabolites biosynthesis, transport and catabolism;; General function prediction only	Molecular Function: oxidoreductase activity (GO:0016491);;	K09841|4.3e-78|nto:104121195|K09841 xanthoxin dehydrogenase [EC:1.1.1.288] | (RefSeq) xanthoxin dehydrogenase-like	Carotenoid biosynthesis (ko00906)	[R]	General function prediction only	Enoyl-(Acyl carrier protein) reductase	Secoisolariciresinol dehydrogenase (Fragment) OS=Forsythia intermedia OX=55183 PE=1 SV=1	Q	Secondary metabolites biosynthesis, transport and catabolism	unnamed protein product [Prunus armeniaca]	molecular function: catalytic activity (GO:0003824)
PaF106G0200009482.01	PaF106G0200009482.01	0.597254	31	0.553338	27	0.261208	15	1.82924	104	1.57115	75	1.2558	69	0.000217891	-1.24652	down	down	down	down	5.13807e-05	down	0.000217891	-1.24652	down	--	--	Biological Process: response to acid chemical (GO:0001101);; Biological Process: regulation of response to biotic stimulus (GO:0002831);; Biological Process: organic acid metabolic process (GO:0006082);; Biological Process: cellular aromatic compound metabolic process (GO:0006725);; Biological Process: biological_process (GO:0008150);; Biological Process: metabolic process (GO:0008152);; Biologic…	--	--	--	--	--	--	S	Function unknown	unnamed protein product [Prunus armeniaca]	biological process: response to stimulus (GO:0050896);; biological process: biological regulation (GO:0065007);; biological process: metabolic process (GO:0008152);; biological process: cellular process (GO:0009987);; biological process: single-organism process (GO:0044699);; biological process: multi-organism process (GO:0051704)
PaF106G0100000940.01	PaF106G0100000940.01	0.415001	45	0.739199	74	0.698654	82	1.88255	218	2.00622	193	1.65742	187	5.34089e-08	-1.32306	down	down	down	down	6.32742e-09	down	5.34089e-08	-1.32306	down	--	--	Molecular Function: molecular_function (GO:0003674);; Molecular Function: nucleic acid binding (GO:0003676);; Molecular Function: RNA binding (GO:0003723);; Molecular Function: catalytic activity (GO:0003824);; Molecular Function: nuclease activity (GO:0004518);; Molecular Function: endonuclease activity (GO:0004519);; Molecular Function: binding (GO:0005488);; Cellular Component: cellular_compon…	K19090|1.8e-111|fve:101300361|K19090 CRISPR-associated protein Cas5t | (RefSeq) putative pentatricopeptide repeat-containing protein At3g05240	--	[R]	General function prediction only	PPR repeat family	Pentatricopeptide repeat-containing protein At2g34400 OS=Arabidopsis thaliana OX=3702 GN=PCMP-E23 PE=3 SV=2	S	Function unknown	PREDICTED: pentatricopeptide repeat-containing protein At2g34400 [Prunus mume]	molecular function: binding (GO:0005488);; molecular function: catalytic activity (GO:0003824);; biological process: metabolic process (GO:0008152);; biological process: cellular process (GO:0009987);; cellular component: cell (GO:0005623);; cellular component: cell part (GO:0044464);; cellular component: organelle (GO:0043226)
PaF106G0800031599.01	PaF106G0800031599.01	6.19651	234	6.31591	229	7.13424	291	3.85337	153	2.89354	93	1.65102	69	6.62819e-07	1.20513	up	up	up	up	9.47762e-08	up	6.62819e-07	1.20513	up	--	--	Biological Process: response to auxin (GO:0009733);;	K14488|1.1e-46|pavi:110745503|K14488 SAUR family protein | (RefSeq) indole-3-acetic acid-induced protein ARG7-like	Plant hormone signal transduction (ko04075)	--	--	Auxin responsive protein	Indole-3-acetic acid-induced protein ARG7 OS=Vigna radiata var. radiata OX=3916 GN=ARG7 PE=2 SV=1	--	--	indole-3-acetic acid-induced protein ARG7 [Prunus persica]	biological process: response to stimulus (GO:0050896)
PaF106G0500020327.01	PaF106G0500020327.01	43.6707	2802	38.8867	2326	43.7213	3049	103.334	7215	87.2096	5088	107.867	7302	3.91998e-28	-1.14539	down	down	down	down	9.066e-30	down	3.91998e-28	-1.14539	down	[IR]	Lipid transport and metabolism;; General function prediction only	Molecular Function: hydrolase activity, acting on ester bonds (GO:0016788);;	K01206|1.5e-39|boe:106299976|K01206 alpha-L-fucosidase [EC:3.2.1.51] | (RefSeq) alpha-L-fucosidase 3	Other glycan degradation (ko00511)	--	--	GDSL-like Lipase/Acylhydrolase	GDSL esterase/lipase At3g48460 OS=Arabidopsis thaliana OX=3702 GN=At3g48460 PE=2 SV=1	S	Function unknown	unnamed protein product [Prunus armeniaca]	molecular function: catalytic activity (GO:0003824)
PaF106G0800032573.01	PaF106G0800032573.01	4.48139	242	3.27611	176	3.73951	232	0.972167	65	1.0827	57	0.919368	59	3.49202e-15	1.74498	up	up	up	up	1.86706e-16	up	3.49202e-15	1.74498	up	[P]	Inorganic ion transport and metabolism	Molecular Function: carbonate dehydratase activity (GO:0004089);; Molecular Function: zinc ion binding (GO:0008270);; Biological Process: cyanate catabolic process (GO:0009440);; Biological Process: carbon utilization (GO:0015976);;	K01673|2.9e-145|pmum:103341853|K01673 carbonic anhydrase [EC:4.2.1.1] | (RefSeq) carbonic anhydrase 2-like	Nitrogen metabolism (ko00910)	[P]	Inorganic ion transport and metabolism	Carbonic anhydrase	Carbonic anhydrase, chloroplastic OS=Nicotiana tabacum OX=4097 PE=2 SV=1	P	Inorganic ion transport and metabolism	PREDICTED: carbonic anhydrase 2-like [Prunus mume]	molecular function: catalytic activity (GO:0003824);; molecular function: binding (GO:0005488);; biological process: metabolic process (GO:0008152);; biological process: cellular process (GO:0009987);; biological process: single-organism process (GO:0044699)
PaF106G0100004813.01	PaF106G0100004813.01	1.38973	101	2.80303	190	2.20357	174	0.337386	27	0.715544	48	0.60312	47	9.74346e-08	1.61518	up	up	up	up	1.20802e-08	up	9.74346e-08	1.61518	up	[QV]	Secondary metabolites biosynthesis, transport and catabolism;; Defense mechanisms	Molecular Function: monooxygenase activity (GO:0004497);; Molecular Function: iron ion binding (GO:0005506);; Cellular Component: integral component of membrane (GO:0016021);; Molecular Function: oxidoreductase activity, acting on paired donors, with incorporation or reduction of molecular oxygen (GO:0016705);; Molecular Function: heme binding (GO:0020037);;	K20771|3.5e-305|pmum:103320572|K20771 carlactone C-19 oxidase [EC:1.14.-.-] | (RefSeq) cytochrome P450 711A1-like isoform X1	--	[Q]	Secondary metabolites biosynthesis, transport and catabolism	Cytochrome P450	Cytochrome P450 711A1 OS=Arabidopsis thaliana OX=3702 GN=CYP711A1 PE=2 SV=1	Q	Secondary metabolites biosynthesis, transport and catabolism	unnamed protein product [Prunus armeniaca]	biological process: metabolic process (GO:0008152);; biological process: single-organism process (GO:0044699);; molecular function: catalytic activity (GO:0003824);; molecular function: binding (GO:0005488);; cellular component: membrane (GO:0016020);; cellular component: membrane part (GO:0044425)
PaF106G0300011891.01	PaF106G0300011891.01	1.84145	214	3.01723	325	2.49683	313	8.84375	1119	10.7687	1137	9.52155	1166	3.06119e-31	-1.83103	down	down	down	down	6.0549e-33	down	3.06119e-31	-1.83103	down	--		Molecular Function: protein kinase activity (GO:0004672);; Molecular Function: ATP binding (GO:0005524);; Biological Process: protein phosphorylation (GO:0006468);; Biological Process: recognition of pollen (GO:0048544);;	K03283|2.4e-40|qsu:112017276|K03283 heat shock 70kDa protein 1/2/6/8 | (RefSeq) heat shock cognate 70 kDa protein 2-like	Spliceosome (ko03040);; Protein processing in endoplasmic reticulum (ko04141);; Endocytosis (ko04144)	--	--	Protein of unknown function (DUF789)	G-type lectin S-receptor-like serine/threonine-protein kinase At2g19130 OS=Arabidopsis thaliana OX=3702 GN=At2g19130 PE=2 SV=1	S	Function unknown	PREDICTED: uncharacterized protein LOC103329493 [Prunus mume]	biological process: metabolic process (GO:0008152);; biological process: cellular process (GO:0009987);; molecular function: catalytic activity (GO:0003824);; molecular function: binding (GO:0005488);; biological process: reproduction (GO:0000003);; biological process: reproductive process (GO:0022414);; biological process: single-organism process (GO:0044699)
PaF106G0600024068.01	PaF106G0600024068.01	2.45816	157	2.67944	160	3.67603	255	14.7456	1024	12.2075	708	9.67559	651	1.70237e-25	-1.85772	down	down	down	down	4.75268e-27	down	1.70237e-25	-1.85772	down	--	--	Molecular Function: protein dimerization activity (GO:0046983);;	K16190|1.2e-11|bdi:100843665|K16190 glucuronokinase [EC:2.7.1.43] | (RefSeq) transcription factor TDR	Pentose and glucuronate interconversions (ko00040);; Ascorbate and aldarate metabolism (ko00053);; Amino sugar and nucleotide sugar metabolism (ko00520)	--	--	Helix-loop-helix DNA-binding domain	Transcription factor bHLH93 OS=Arabidopsis thaliana OX=3702 GN=BHLH93 PE=1 SV=1	K	Transcription	unnamed protein product [Prunus armeniaca]	molecular function: binding (GO:0005488)
PaF106G0100000806.01	PaF106G0100000806.01	3.33557	648	3.08367	559	3.2895	695	1.37321	291	1.90871	337	1.49966	308	4.82147e-12	1.05266	up	up	up	up	3.3726e-13	up	4.82147e-12	1.05266	up	--	--	Molecular Function: helicase activity (GO:0004386);;	--	--	--	--	--	--	--	--	putative RNA helicase SDE3 [Prunus yedoensis var. nudiflora]	molecular function: catalytic activity (GO:0003824)
PaF106G0400016137.01	PaF106G0400016137.01	0.353124	33	0.242768	21	0.236378	24	0.956695	96	1.47686	123	1.09347	106	1.69227e-07	-1.59287	down	down	down	down	2.18268e-08	down	1.69227e-07	-1.59287	down	--		Molecular Function: protein kinase activity (GO:0004672);; Molecular Function: ATP binding (GO:0005524);; Cellular Component: integral component of membrane (GO:0016021);; Molecular Function: carbohydrate binding (GO:0030246);;	K22133|5.1e-96|egr:104443802|K22133 oxalate---CoA ligase [EC:6.2.1.8] | (RefSeq) oxalate--CoA ligase	Glyoxylate and dicarboxylate metabolism (ko00630)	--	--	Legume lectin domain	L-type lectin-domain containing receptor kinase IX.1 OS=Arabidopsis thaliana OX=3702 GN=LECRK91 PE=1 SV=1	T	Signal transduction mechanisms	L-type lectin-domain containing receptor kinase IX.1-like [Prunus avium]	biological process: metabolic process (GO:0008152);; biological process: cellular process (GO:0009987);; molecular function: catalytic activity (GO:0003824);; molecular function: binding (GO:0005488);; cellular component: membrane (GO:0016020);; cellular component: membrane part (GO:0044425)
PaF106G0200008335.01	PaF106G0200008335.01	1.14365	77	1.71737	107	1.23501	90	2.85306	208	3.1948	194	3.32873	235	9.84812e-06	-1.01507	down	down	down	down	1.74703e-06	down	9.84812e-06	-1.01507	down	[QV]	Secondary metabolites biosynthesis, transport and catabolism;; Defense mechanisms	Molecular Function: monooxygenase activity (GO:0004497);; Molecular Function: iron ion binding (GO:0005506);; Cellular Component: integral component of membrane (GO:0016021);; Molecular Function: oxidoreductase activity, acting on paired donors, with incorporation or reduction of molecular oxygen (GO:0016705);; Molecular Function: heme binding (GO:0020037);;	K20661|1.9e-70|nnu:104612956|K20661 cytochrome P450 family 714 subfamily A polypeptide 1 | (RefSeq) cytochrome P450 714A1-like	--	[QI]	Secondary metabolites biosynthesis, transport and catabolism;; Lipid transport and metabolism	Cytochrome P450	Cytochrome P450 714C2 OS=Oryza sativa subsp. japonica OX=39947 GN=CYP714C2 PE=2 SV=1	Q	Secondary metabolites biosynthesis, transport and catabolism	unnamed protein product [Prunus armeniaca]	biological process: metabolic process (GO:0008152);; biological process: single-organism process (GO:0044699);; molecular function: catalytic activity (GO:0003824);; molecular function: binding (GO:0005488);; cellular component: membrane (GO:0016020);; cellular component: membrane part (GO:0044425)
PaF106G0400016817.01	PaF106G0400016817.01	0.245546	18	0.092781	7	0.158992	13	1.24273	100	1.14252	77	1.13017	88	6.4151e-10	-2.02542	down	down	down	down	5.79256e-11	down	6.4151e-10	-2.02542	down	--	--	Molecular Function: magnesium ion binding (GO:0000287);; Molecular Function: terpene synthase activity (GO:0010333);;	K14173|1.3e-312|pmum:103325568|K14173 alpha-farnesene synthase [EC:4.2.3.46] | (RefSeq) (E,E)-alpha-farnesene synthase-like	Sesquiterpenoid and triterpenoid biosynthesis (ko00909)	--	--	Terpene synthase family, metal binding domain	(E,E)-alpha-farnesene synthase OS=Malus domestica OX=3750 GN=AFS1 PE=1 SV=2	S	Function unknown	unnamed protein product [Prunus armeniaca]	molecular function: binding (GO:0005488);; molecular function: catalytic activity (GO:0003824)
PaF106G0400016431.01	PaF106G0400016431.01	0.413214	32	0.361843	27	0.404072	34	2.52877	213	2.91726	206	2.49865	204	6.37363e-23	-2.34837	down	down	down	down	2.06829e-24	down	6.37363e-23	-2.34837	down	[QV]	Secondary metabolites biosynthesis, transport and catabolism;; Defense mechanisms	Molecular Function: monooxygenase activity (GO:0004497);; Molecular Function: iron ion binding (GO:0005506);; Molecular Function: oxidoreductase activity, acting on paired donors, with incorporation or reduction of molecular oxygen (GO:0016705);; Molecular Function: heme binding (GO:0020037);;	K07426|2.5e-62|cpep:111792333|K07426 cytochrome P450 family 4 subfamily B polypeptide 1 [EC:1.14.14.1] | (RefSeq) cytochrome P450 CYP72A219-like	--	[QI]	Secondary metabolites biosynthesis, transport and catabolism;; Lipid transport and metabolism	Cytochrome P450	Cytochrome P450 CYP72A219 OS=Panax ginseng OX=4054 PE=2 SV=1	Q	Secondary metabolites biosynthesis, transport and catabolism	unnamed protein product [Prunus armeniaca]	biological process: metabolic process (GO:0008152);; biological process: single-organism process (GO:0044699);; molecular function: catalytic activity (GO:0003824);; molecular function: binding (GO:0005488)
PaF106G0700026433.01	PaF106G0700026433.01	2.01875	108	2.51972	126	2.73141	159	6.75164	392	7.42527	361	3.57701	202	1.4789e-05	-1.06997	down	down	down	down	2.72181e-06	down	1.4789e-05	-1.06997	down	[K]	Transcription	Molecular Function: GTPase activity (GO:0003924);; Molecular Function: GTP binding (GO:0005525);; Biological Process: small GTPase mediated signal transduction (GO:0007264);;	K04392|1.8e-116|pmum:103340893|K04392 Ras-related C3 botulinum toxin substrate 1 | (RefSeq) rac-like GTP-binding protein ARAC7	Phagosome (ko04145)	[R]	General function prediction only	Ras family	Rac-like GTP-binding protein ARAC7 OS=Arabidopsis thaliana OX=3702 GN=ARAC7 PE=1 SV=1	S	Function unknown	PREDICTED: rac-like GTP-binding protein ARAC7 [Prunus mume]	molecular function: catalytic activity (GO:0003824);; molecular function: binding (GO:0005488);; biological process: cellular process (GO:0009987);; biological process: signaling (GO:0023052);; biological process: single-organism process (GO:0044699);; biological process: response to stimulus (GO:0050896);; biological process: biological regulation (GO:0065007)
PaF106G0600021563.01	PaF106G0600021563.01	1.65875	191	1.64958	177	1.77972	223	0.129709	17	0.123601	13	0.076233	10	5.18976e-36	3.32287	up	up	up	up	8.39386e-38	up	5.18976e-36	3.32287	up	--		Molecular Function: protein serine/threonine kinase activity (GO:0004674);; Molecular Function: ATP binding (GO:0005524);; Cellular Component: integral component of membrane (GO:0016021);; Molecular Function: carbohydrate binding (GO:0030246);; Biological Process: recognition of pollen (GO:0048544);;	K13416|3.0e-58|mdm:103416332|K13416 brassinosteroid insensitive 1-associated receptor kinase 1 [EC:2.7.10.1 2.7.11.1] | (RefSeq) BRASSINOSTEROID INSENSITIVE 1-associated receptor kinase 1-like isoform X1	MAPK signaling pathway - plant (ko04016);; Plant hormone signal transduction (ko04075);; Plant-pathogen interaction (ko04626)	--	--	Protein kinase domain	G-type lectin S-receptor-like serine/threonine-protein kinase RLK1 OS=Arabidopsis thaliana OX=3702 GN=RLK1 PE=2 SV=2	T	Signal transduction mechanisms	PREDICTED: G-type lectin S-receptor-like serine/threonine-protein kinase RLK1 [Prunus mume]	biological process: metabolic process (GO:0008152);; biological process: cellular process (GO:0009987);; molecular function: catalytic activity (GO:0003824);; molecular function: binding (GO:0005488);; cellular component: membrane (GO:0016020);; cellular component: membrane part (GO:0044425);; biological process: reproduction (GO:0000003);; biological process: reproductive process (GO:0022414);; …
PaF106G0300012858.01	PaF106G0300012858.01	0.088483	8	0.209491	16	0	0	0.823235	74	0.695982	52	0.619625	54	0.000275128	-1.43383	down	down	down	down	6.63373e-05	down	0.000275128	-1.43383	down	--		Molecular Function: protein kinase activity (GO:0004672);; Molecular Function: ATP binding (GO:0005524);; Cellular Component: integral component of membrane (GO:0016021);;	K13416|1.2e-49|ccaj:109804867|K13416 brassinosteroid insensitive 1-associated receptor kinase 1 [EC:2.7.10.1 2.7.11.1] | (RefSeq) BRASSINOSTEROID INSENSITIVE 1-associated receptor kinase 1-like	MAPK signaling pathway - plant (ko04016);; Plant hormone signal transduction (ko04075);; Plant-pathogen interaction (ko04626)	--	--	Protein kinase domain	PR5-like receptor kinase OS=Arabidopsis thaliana OX=3702 GN=PR5K PE=1 SV=1	T	Signal transduction mechanisms	unnamed protein product [Prunus armeniaca]	biological process: metabolic process (GO:0008152);; biological process: cellular process (GO:0009987);; molecular function: catalytic activity (GO:0003824);; molecular function: binding (GO:0005488);; cellular component: membrane (GO:0016020);; cellular component: membrane part (GO:0044425)
PaF106G0200010499.01	PaF106G0200010499.01	4.02243	279	3.95587	256	3.91801	296	1.79887	136	1.31897	84	1.10483	81	7.01986e-12	1.43491	up	up	up	up	4.99714e-13	up	7.01986e-12	1.43491	up	[QV]	Secondary metabolites biosynthesis, transport and catabolism;; Defense mechanisms	Molecular Function: monooxygenase activity (GO:0004497);; Molecular Function: iron ion binding (GO:0005506);; Cellular Component: integral component of membrane (GO:0016021);; Molecular Function: oxidoreductase activity, acting on paired donors, with incorporation or reduction of molecular oxygen (GO:0016705);; Molecular Function: heme binding (GO:0020037);;	K07425|2.8e-190|nau:109241958|K07425 long-chain fatty acid omega-monooxygenase [EC:1.14.14.80] | (RefSeq) cytokinin hydroxylase-like	Fatty acid degradation (ko00071);; Arachidonic acid metabolism (ko00590)	[QI]	Secondary metabolites biosynthesis, transport and catabolism;; Lipid transport and metabolism	Cytochrome P450	Cytochrome P450 714C2 OS=Oryza sativa subsp. japonica OX=39947 GN=CYP714C2 PE=2 SV=1	Q	Secondary metabolites biosynthesis, transport and catabolism	unnamed protein product [Prunus armeniaca]	biological process: metabolic process (GO:0008152);; biological process: single-organism process (GO:0044699);; molecular function: catalytic activity (GO:0003824);; molecular function: binding (GO:0005488);; cellular component: membrane (GO:0016020);; cellular component: membrane part (GO:0044425)
PaF106G0800031608.01	PaF106G0800031608.01	12.5678	646	17.0397	817	14.0351	788	7.47248	393	5.92647	237	5.7109	278	4.78131e-16	1.34389	up	up	up	up	2.37416e-17	up	4.78131e-16	1.34389	up	--	--	Biological Process: response to auxin (GO:0009733);;	K14488|1.8e-47|pavi:110745503|K14488 SAUR family protein | (RefSeq) indole-3-acetic acid-induced protein ARG7-like	Plant hormone signal transduction (ko04075)	--	--	Auxin responsive protein	Indole-3-acetic acid-induced protein ARG7 OS=Vigna radiata var. radiata OX=3916 GN=ARG7 PE=2 SV=1	--	--	indole-3-acetic acid-induced protein ARG7 [Prunus persica]	biological process: response to stimulus (GO:0050896)
PaF106G0200009483.01	PaF106G0200009483.01	0.257876	17	0.327533	20	0.255827	18	1.62379	111	1.1273	65	0.844579	56	1.31712e-05	-1.46984	down	down	down	down	2.39692e-06	down	1.31712e-05	-1.46984	down	--	--	Molecular Function: protein kinase activity (GO:0004672);; Molecular Function: ATP binding (GO:0005524);; Cellular Component: cellular_component (GO:0005575);; Biological Process: response to stress (GO:0006950);; Biological Process: defense response (GO:0006952);; Biological Process: biological_process (GO:0008150);; Biological Process: response to external stimulus (GO:0009605);; Biological Pro…	--	--	[T]	Signal transduction mechanisms	--	--	T	Signal transduction mechanisms	unnamed protein product [Prunus armeniaca]	biological process: metabolic process (GO:0008152);; biological process: cellular process (GO:0009987);; molecular function: catalytic activity (GO:0003824);; molecular function: binding (GO:0005488);; biological process: response to stimulus (GO:0050896);; biological process: multi-organism process (GO:0051704);; cellular component: membrane (GO:0016020)
PaF106G0300012867.01	PaF106G0300012867.01	1.3466	111	1.70698	131	1.00398	90	0	0	0.053435	4	0.022134	2	6.97888e-25	3.53673	up	up	up	up	1.99509e-26	up	6.97888e-25	3.53673	up	--		Molecular Function: protein kinase activity (GO:0004672);; Molecular Function: ATP binding (GO:0005524);; Molecular Function: polysaccharide binding (GO:0030247);;	K13415|5.8e-33|mus:103980973|K13415 protein brassinosteroid insensitive 1 [EC:2.7.10.1 2.7.11.1] | (RefSeq) systemin receptor SR160-like	Plant hormone signal transduction (ko04075)	[T]	Signal transduction mechanisms	Protein kinase domain	LEAF RUST 10 DISEASE-RESISTANCE LOCUS RECEPTOR-LIKE PROTEIN KINASE-like 2.1 OS=Arabidopsis thaliana OX=3702 GN=LRK10L-2.1 PE=3 SV=1	T	Signal transduction mechanisms	LEAF RUST 10 DISEASE-RESISTANCE LOCUS RECEPTOR-LIKE PROTEIN KINASE-like 2.1 [Prunus avium]	biological process: metabolic process (GO:0008152);; biological process: cellular process (GO:0009987);; molecular function: catalytic activity (GO:0003824);; molecular function: binding (GO:0005488)
PaF106G0100000431.01	PaF106G0100000431.01	1.01407	138	0.695249	88	1.26062	186	2.51932	371	4.05273	499	3.01968	432	1.04003e-10	-1.45524	down	down	down	down	8.53925e-12	down	1.04003e-10	-1.45524	down	[KL]	Transcription;; Replication, recombination and repair	Molecular Function: nucleic acid binding (GO:0003676);; Molecular Function: ATP binding (GO:0005524);; Molecular Function: zinc ion binding (GO:0008270);; Molecular Function: hydrolase activity, acting on acid anhydrides, in phosphorus-containing anhydrides (GO:0016818);;	K15505|0.0e+00|pmum:103324215|K15505 DNA repair protein RAD5 [EC:3.6.4.-] | (RefSeq) putative SWI/SNF-related matrix-associated actin-dependent regulator of chromatin subfamily A member 3-like 3	--	[KL]	Transcription;; Replication, recombination and repair	SNF2 family N-terminal domain	DNA repair protein RAD5B OS=Arabidopsis thaliana OX=3702 GN=RAD5B PE=3 SV=1	--	--	unnamed protein product [Prunus armeniaca]	molecular function: binding (GO:0005488);; molecular function: catalytic activity (GO:0003824)
PaF106G0800031596.01	PaF106G0800031596.01	9.59725	234	12.5551	285	11.0822	293	3.57314	95	3.26743	73	2.6646	69	8.29285e-17	1.71642	up	up	up	up	3.91704e-18	up	8.29285e-17	1.71642	up	--	--	Biological Process: response to auxin (GO:0009733);;	K14488|2.1e-69|pmum:103335786|K14488 SAUR family protein | (RefSeq) indole-3-acetic acid-induced protein ARG7-like	Plant hormone signal transduction (ko04075)	--	--	Auxin responsive protein	Indole-3-acetic acid-induced protein ARG7 OS=Vigna radiata var. radiata OX=3916 GN=ARG7 PE=2 SV=1	S	Function unknown	PREDICTED: indole-3-acetic acid-induced protein ARG7-like [Prunus mume]	biological process: response to stimulus (GO:0050896)
PaF106G0300011959.01	PaF106G0300011959.01	5.22701	444	5.69775	448	6.01964	559	30.0124	2787	33.8653	2627	32.6206	2923	1.15296e-133	-2.39745	down	down	down	down	2.07858e-136	down	1.15296e-133	-2.39745	down	--	--	Molecular Function: magnesium ion binding (GO:0000287);; Molecular Function: terpene synthase activity (GO:0010333);;	K18108|1.5e-139|vvi:100855144|K18108 (-)-alpha-terpineol synthase [EC:4.2.3.111] | (RefSeq) (-)-alpha-terpineol synthase	Monoterpenoid biosynthesis (ko00902)	--	--	Terpene synthase family, metal binding domain	Probable terpene synthase 9 OS=Ricinus communis OX=3988 GN=TPS9 PE=3 SV=1	S	Function unknown	PREDICTED: probable terpene synthase 9 [Prunus mume]	molecular function: binding (GO:0005488);; molecular function: catalytic activity (GO:0003824)
PaF106G0800031588.01	PaF106G0800031588.01	9.87716	227	10.8872	234	11.4961	288	27.5009	688	24.5419	513	20.5603	499	9.45253e-12	-1.04682	down	down	down	down	6.86518e-13	down	9.45253e-12	-1.04682	down	--	--	Biological Process: response to auxin (GO:0009733);;	K14488|3.4e-73|pper:18768105|K14488 SAUR family protein | (RefSeq) auxin-responsive protein SAUR50	Plant hormone signal transduction (ko04075)	--	--	Auxin responsive protein	Auxin-responsive protein SAUR50 OS=Arabidopsis thaliana OX=3702 GN=SAUR50 PE=1 SV=1	S	Function unknown	auxin-responsive protein SAUR50 [Prunus persica]	biological process: response to stimulus (GO:0050896)
PaF106G0400016118.01	PaF106G0400016118.01	0.186539	35	0.246171	43	0.257485	53	0.657817	135	0.802147	137	0.572061	114	2.45562e-06	-1.27366	down	down	down	down	3.88189e-07	down	2.45562e-06	-1.27366	down	--		Molecular Function: protein kinase activity (GO:0004672);; Molecular Function: ATP binding (GO:0005524);; Molecular Function: carbohydrate binding (GO:0030246);;	K22133|1.4e-73|egr:104443803|K22133 oxalate---CoA ligase [EC:6.2.1.8] | (RefSeq) oxalate--CoA ligase isoform X2	Glyoxylate and dicarboxylate metabolism (ko00630)	--	--	Protein kinase domain	L-type lectin-domain containing receptor kinase IX.1 OS=Arabidopsis thaliana OX=3702 GN=LECRK91 PE=1 SV=1	T	Signal transduction mechanisms	L-type lectin-domain containing receptor kinase IX.1-like [Prunus yedoensis var. nudiflora]	biological process: metabolic process (GO:0008152);; biological process: cellular process (GO:0009987);; molecular function: catalytic activity (GO:0003824);; molecular function: binding (GO:0005488)
PaF106G0300012543.01	PaF106G0300012543.01	6.72146	428	6.89476	410	5.35679	371	1.46581	102	1.50892	88	1.35045	91	4.73944e-28	2.05414	up	up	up	up	1.09856e-29	up	4.73944e-28	2.05414	up	[QV]	Secondary metabolites biosynthesis, transport and catabolism;; Defense mechanisms	Molecular Function: monooxygenase activity (GO:0004497);; Molecular Function: iron ion binding (GO:0005506);; Cellular Component: integral component of membrane (GO:0016021);; Molecular Function: oxidoreductase activity, acting on paired donors, with incorporation or reduction of molecular oxygen (GO:0016705);; Molecular Function: heme binding (GO:0020037);;	K07437|1.3e-274|pmum:103328825|K07437 cytochrome P450 family 26 subfamily A | (RefSeq) taxadiene 5-alpha hydroxylase	--	[QI]	Secondary metabolites biosynthesis, transport and catabolism;; Lipid transport and metabolism	Cytochrome P450	Taxadiene 5-alpha hydroxylase OS=Taxus cuspidata OX=99806 PE=1 SV=2	Q	Secondary metabolites biosynthesis, transport and catabolism	PREDICTED: taxadiene 5-alpha hydroxylase [Prunus mume]	biological process: metabolic process (GO:0008152);; biological process: single-organism process (GO:0044699);; molecular function: catalytic activity (GO:0003824);; molecular function: binding (GO:0005488);; cellular component: membrane (GO:0016020);; cellular component: membrane part (GO:0044425)
PaF106G0100006225.01	PaF106G0100006225.01	0.158136	9	0.169793	9	0.35452	21	0.801643	47	1.13926	55	1.08131	61	0.00015125	-1.3793	down	down	down	down	3.42871e-05	down	0.00015125	-1.3793	down	--	--	Molecular Function: protein dimerization activity (GO:0046983);;	K13422|1.8e-12|pop:18094165|K13422 transcription factor MYC2 | (RefSeq) transcription factor MYC2	MAPK signaling pathway - plant (ko04016);; Plant hormone signal transduction (ko04075)	--	--	Helix-loop-helix DNA-binding domain	Transcription factor bHLH93 OS=Arabidopsis thaliana OX=3702 GN=BHLH93 PE=1 SV=1	K	Transcription	beta HLH protein 93 [Prunus dulcis]	molecular function: binding (GO:0005488)
PaF106G0300013971.01	PaF106G0300013971.01	5.94713	737	6.06982	701	7.10693	957	1.67445	226	1.34309	152	1.51124	198	2.99383e-49	2.06289	up	up	up	up	3.05335e-51	up	2.99383e-49	2.06289	up	--	--	Biological Process: telomere maintenance (GO:0000723);; Molecular Function: DNA helicase activity (GO:0003678);; Molecular Function: ATP binding (GO:0005524);; Biological Process: DNA repair (GO:0006281);; Biological Process: DNA recombination (GO:0006310);;	K07466|2.2e-119|pper:18792188|K07466 replication factor A1 | (RefSeq) replication protein A 70 kDa DNA-binding subunit B	DNA replication (ko03030);; Nucleotide excision repair (ko03420);; Mismatch repair (ko03430);; Homologous recombination (ko03440)	--	--	Replication factor-A C terminal domain	--	L	Replication, recombination and repair	unnamed protein product [Prunus armeniaca]	biological process: metabolic process (GO:0008152);; biological process: cellular process (GO:0009987);; biological process: biological regulation (GO:0065007);; biological process: cellular component organization or biogenesis (GO:0071840);; molecular function: catalytic activity (GO:0003824);; molecular function: binding (GO:0005488);; biological process: response to stimulus (GO:0050896)
PaF106G0500018981.01	PaF106G0500018981.01	4.79869	342	4.61488	304	5.90882	450	12.9433	965	13.8212	872	12.2681	881	6.15702e-21	-1.19731	down	down	down	down	2.22952e-22	down	6.15702e-21	-1.19731	down	--	--	Molecular Function: protein kinase activity (GO:0004672);; Molecular Function: ATP binding (GO:0005524);; Biological Process: brassinosteroid mediated signaling pathway (GO:0009742);;	K14500|6.0e-288|pmum:103336934|K14500 BR-signaling kinase [EC:2.7.11.1] | (RefSeq) probable serine/threonine-protein kinase At5g41260	Plant hormone signal transduction (ko04075)	--	--	Protein kinase domain	Serine/threonine-protein kinase BSK2 OS=Arabidopsis thaliana OX=3702 GN=BSK2 PE=1 SV=1	T	Signal transduction mechanisms	hypothetical protein PRUPE_5G041700 [Prunus persica]	biological process: metabolic process (GO:0008152);; biological process: cellular process (GO:0009987);; molecular function: catalytic activity (GO:0003824);; molecular function: binding (GO:0005488);; biological process: signaling (GO:0023052);; biological process: single-organism process (GO:0044699);; biological process: response to stimulus (GO:0050896);; biological process: biological regula…
PaF106G0100005274.01	PaF106G0100005274.01	3.46552	328	4.95134	438	3.33617	345	0.493558	51	0.574078	50	0.475279	48	2.87065e-35	2.70414	up	up	up	up	4.82039e-37	up	2.87065e-35	2.70414	up	--	--	Biological Process: telomere maintenance (GO:0000723);; Molecular Function: DNA helicase activity (GO:0003678);; Molecular Function: ATP binding (GO:0005524);; Biological Process: DNA repair (GO:0006281);; Biological Process: DNA recombination (GO:0006310);;	K07466|4.6e-189|pper:18792188|K07466 replication factor A1 | (RefSeq) replication protein A 70 kDa DNA-binding subunit B	DNA replication (ko03030);; Nucleotide excision repair (ko03420);; Mismatch repair (ko03430);; Homologous recombination (ko03440)	--	--	Replication protein A OB domain	--	D	Cell cycle control, cell division, chromosome partitioning	unnamed protein product [Prunus armeniaca]	biological process: metabolic process (GO:0008152);; biological process: cellular process (GO:0009987);; biological process: biological regulation (GO:0065007);; biological process: cellular component organization or biogenesis (GO:0071840);; molecular function: catalytic activity (GO:0003824);; molecular function: binding (GO:0005488);; biological process: response to stimulus (GO:0050896)
PaF106G0200008745.01	PaF106G0200008745.01	2.35479	178	3.16142	222	3.08505	253	31.3637	2567	23.3459	1597	23.7343	1884	1.23331e-98	-2.99056	down	down	down	down	3.87513e-101	down	1.23331e-98	-2.99056	down	[QV]	Secondary metabolites biosynthesis, transport and catabolism;; Defense mechanisms	Molecular Function: iron ion binding (GO:0005506);; Cellular Component: integral component of membrane (GO:0016021);; Molecular Function: oxidoreductase activity, acting on paired donors, with incorporation or reduction of molecular oxygen (GO:0016705);; Molecular Function: heme binding (GO:0020037);;	K20495|2.5e-116|ppp:112291140|K20495 long-chain fatty acid omega-monooxygenase [EC:1.14.14.80] | (RefSeq) cytochrome P450 704B1-like	Fatty acid degradation (ko00071);; Cutin, suberine and wax biosynthesis (ko00073)	[QI]	Secondary metabolites biosynthesis, transport and catabolism;; Lipid transport and metabolism	Cytochrome P450	Cytochrome P450 704C1 OS=Pinus taeda OX=3352 GN=CYP704C1 PE=2 SV=1	--	--	PREDICTED: cytochrome P450 704C1-like [Prunus mume]	molecular function: binding (GO:0005488);; cellular component: membrane (GO:0016020);; cellular component: membrane part (GO:0044425);; biological process: metabolic process (GO:0008152);; biological process: single-organism process (GO:0044699);; molecular function: catalytic activity (GO:0003824)
PaF106G0300013592.01	PaF106G0300013592.01	5.4188	320	6.51287	358	6.83819	438	1.47886	95	2.07826	112	1.03642	65	8.42129e-19	1.91314	up	up	up	up	3.45718e-20	up	8.42129e-19	1.91314	up	[M]	Cell wall/membrane/envelope biogenesis	Molecular Function: protein serine/threonine kinase activity (GO:0004674);; Molecular Function: ATP binding (GO:0005524);; Cellular Component: integral component of membrane (GO:0016021);;	K13416|2.5e-51|lsv:111899011|K13416 brassinosteroid insensitive 1-associated receptor kinase 1 [EC:2.7.10.1 2.7.11.1] | (RefSeq) BRASSINOSTEROID INSENSITIVE 1-associated receptor kinase 1-like isoform X1	MAPK signaling pathway - plant (ko04016);; Plant hormone signal transduction (ko04075);; Plant-pathogen interaction (ko04626)	[T]	Signal transduction mechanisms	Protein kinase domain	LEAF RUST 10 DISEASE-RESISTANCE LOCUS RECEPTOR-LIKE PROTEIN KINASE-like 2.2 OS=Arabidopsis thaliana OX=3702 GN=LRK10L-2.2 PE=3 SV=2	T	Signal transduction mechanisms	LEAF RUST 10 DISEASE-RESISTANCE LOCUS RECEPTOR-LIKE PROTEIN KINASE-like 2.2 [Prunus dulcis]	biological process: metabolic process (GO:0008152);; biological process: cellular process (GO:0009987);; molecular function: catalytic activity (GO:0003824);; molecular function: binding (GO:0005488);; cellular component: membrane (GO:0016020);; cellular component: membrane part (GO:0044425)
PaF106G0400016558.01	PaF106G0400016558.01	0	0	0	0	0.011943	2	0.964673	124	1.23224	113	0.959965	105	4.74414e-29	-3.84572	down	down	down	down	1.04345e-30	down	4.74414e-29	-3.84572	down	--		Molecular Function: protein serine/threonine kinase activity (GO:0004674);; Molecular Function: ATP binding (GO:0005524);; Cellular Component: integral component of membrane (GO:0016021);; Molecular Function: carbohydrate binding (GO:0030246);; Biological Process: recognition of pollen (GO:0048544);;	K24104|2.8e-77|thj:104799061|K24104 GPN-loop GTPase | (RefSeq) LOW QUALITY PROTEIN: uncharacterized protein LOC104799061	--	--	--	Protein tyrosine and serine/threonine kinase	G-type lectin S-receptor-like serine/threonine-protein kinase At4g27290 OS=Arabidopsis thaliana OX=3702 GN=At4g27290 PE=3 SV=4	T	Signal transduction mechanisms	G-type lectin S-receptor-like serine/threonine-protein kinase At4g27290 isoform X2 [Prunus persica]	biological process: metabolic process (GO:0008152);; biological process: cellular process (GO:0009987);; molecular function: catalytic activity (GO:0003824);; molecular function: binding (GO:0005488);; cellular component: membrane (GO:0016020);; cellular component: membrane part (GO:0044425);; biological process: reproduction (GO:0000003);; biological process: reproductive process (GO:0022414);; …
PaF106G0600025205.01	PaF106G0600025205.01	13.1879	702	12.4372	617	12.5694	727	3.05351	177	3.43301	167	2.18666	123	1.6521e-38	2.10339	up	up	up	up	2.47637e-40	up	1.6521e-38	2.10339	up	--	--	Cellular Component: integral component of membrane (GO:0016021);; Molecular Function: protein dimerization activity (GO:0046983);;	--	--	--	--	--	--	K	Transcription	transcription factor ABORTED MICROSPORES [Prunus yedoensis var. nudiflora]	cellular component: membrane (GO:0016020);; cellular component: membrane part (GO:0044425);; molecular function: binding (GO:0005488)
PaF106G0700027134.01	PaF106G0700027134.01	10.4713	335	11.4594	342	10.6474	371	2.73556	96	2.23544	66	2.8079	95	5.23621e-27	1.98395	up	up	up	up	1.30002e-28	up	5.23621e-27	1.98395	up	--	--	Biological Process: response to auxin (GO:0009733);;	K14488|9.6e-58|pper:18769935|K14488 SAUR family protein | (RefSeq) auxin-responsive protein SAUR50	Plant hormone signal transduction (ko04075)	--	--	Auxin responsive protein	Auxin-responsive protein SAUR50 OS=Arabidopsis thaliana OX=3702 GN=SAUR50 PE=1 SV=1	S	Function unknown	auxin-responsive protein SAUR50 [Prunus persica]	biological process: response to stimulus (GO:0050896)
PaF106G0400015359.01	PaF106G0400015359.01	0.227314	21	0.156999	14	0.308802	31	0.799068	78	0.610901	50	1.00711	96	0.000212144	-1.2627	down	down	down	down	4.98506e-05	down	0.000212144	-1.2627	down	--		Biological Process: defense response to oomycetes (GO:0002229);; Molecular Function: transmembrane receptor protein serine/threonine kinase activity (GO:0004675);; Molecular Function: ATP binding (GO:0005524);; Cellular Component: plasma membrane (GO:0005886);; Biological Process: defense response (GO:0006952);; Molecular Function: carbohydrate binding (GO:0030246);; Biological Process: defense r…	K22133|1.3e-94|egr:104443802|K22133 oxalate---CoA ligase [EC:6.2.1.8] | (RefSeq) oxalate--CoA ligase	Glyoxylate and dicarboxylate metabolism (ko00630)	--	--	Legume lectin domain	L-type lectin-domain containing receptor kinase IX.1 OS=Arabidopsis thaliana OX=3702 GN=LECRK91 PE=1 SV=1	T	Signal transduction mechanisms	PREDICTED: L-type lectin-domain containing receptor kinase IX.1-like isoform X1 [Prunus mume]	biological process: response to stimulus (GO:0050896);; biological process: multi-organism process (GO:0051704);; biological process: metabolic process (GO:0008152);; biological process: cellular process (GO:0009987);; biological process: signaling (GO:0023052);; biological process: single-organism process (GO:0044699);; biological process: biological regulation (GO:0065007);; molecular function:…
PaF106G0800030789.01	PaF106G0800030789.01	1.86042	88	2.23273	99	2.0684	106	1.05715	55	0.698172	30	0.974138	49	0.000331633	1.0366	up	up	up	up	8.1294e-05	up	0.000331633	1.0366	up	[T]	Signal transduction mechanisms	Molecular Function: protein kinase activity (GO:0004672);; Molecular Function: ATP binding (GO:0005524);;	K23544|8.1e-31|brp:103842861|K23544 serine incorporator 1/3 | (RefSeq) serine incorporator 3	--	[T]	Signal transduction mechanisms	Protein tyrosine and serine/threonine kinase	Serine/threonine-protein kinase ZRK1 OS=Arabidopsis thaliana OX=3702 GN=ZRK1 PE=1 SV=1	T	Signal transduction mechanisms	unnamed protein product [Prunus armeniaca]	biological process: metabolic process (GO:0008152);; biological process: cellular process (GO:0009987);; molecular function: catalytic activity (GO:0003824);; molecular function: binding (GO:0005488)
PaF106G0300011625.01	PaF106G0300011625.01	0	0	0	0	0	0	2.56147	340	1.71924	191	1.96705	253	1.31615e-55	-5.06719	down	down	down	down	1.0847e-57	down	1.31615e-55	-5.06719	down	--		Molecular Function: protein kinase activity (GO:0004672);; Molecular Function: protein serine/threonine kinase activity (GO:0004674);; Molecular Function: ATP binding (GO:0005524);; Cellular Component: plasma membrane (GO:0005886);; Cellular Component: plasmodesma (GO:0009506);; Cellular Component: integral component of membrane (GO:0016021);; Biological Process: protein autophosphorylation (GO:0…	K13435|2.4e-85|sly:101268866|K13435 serine/threonine-protein kinase Pto | (RefSeq) Pto; serine/threonine protein kinase Pto	Plant-pathogen interaction (ko04626)	[T]	Signal transduction mechanisms	Protein tyrosine and serine/threonine kinase	Receptor-like protein kinase FERONIA OS=Arabidopsis thaliana OX=3702 GN=FER PE=1 SV=1	T	Signal transduction mechanisms	PREDICTED: receptor-like protein kinase FERONIA [Prunus mume]	biological process: metabolic process (GO:0008152);; biological process: cellular process (GO:0009987);; molecular function: catalytic activity (GO:0003824);; molecular function: binding (GO:0005488);; cellular component: cell (GO:0005623);; cellular component: membrane (GO:0016020);; cellular component: cell part (GO:0044464);; cellular component: cell junction (GO:0030054);; cellular component:…
Prunus_sibirica_newGene_1679	--	14.752	1018	14.6957	946	12.6982	953	4.37757	329	4.99503	314	3.48559	254	9.74895e-32	1.71907	up	up	up	up	1.89315e-33	up	9.74895e-32	1.71907	up	--	--	Molecular Function: transmembrane receptor protein serine/threonine kinase activity (GO:0004675);; Molecular Function: ion channel activity (GO:0005216);; Molecular Function: ATP binding (GO:0005524);; Cellular Component: plasma membrane (GO:0005886);; Biological Process: protein phosphorylation (GO:0006468);; Cellular Component: integral component of membrane (GO:0016021);;	K05391|2.1e-37|pmum:107881357|K05391 cyclic nucleotide gated channel, plant | (RefSeq) cyclic nucleotide-gated ion channel 1-like	Plant-pathogen interaction (ko04626)	--	--	--	--	--	--	PREDICTED: cyclic nucleotide-gated ion channel 1-like, partial [Prunus mume]	biological process: metabolic process (GO:0008152);; biological process: cellular process (GO:0009987);; biological process: signaling (GO:0023052);; biological process: single-organism process (GO:0044699);; biological process: response to stimulus (GO:0050896);; biological process: biological regulation (GO:0065007);; molecular function: catalytic activity (GO:0003824);; molecular function: sig…
PaF106G0400015902.01	PaF106G0400015902.01	6.39286	575	15.5065	1299	11.0324	1077	132.571	12958	144.233	11780	124.754	11821	3.63108e-23	-2.87399	down	down	down	down	1.15587e-24	down	3.63108e-23	-2.87399	down	--	--	Molecular Function: magnesium ion binding (GO:0000287);; Molecular Function: terpene synthase activity (GO:0010333);;	K15803|0.0e+00|pmum:103343924|K15803 (-)-germacrene D synthase [EC:4.2.3.75] | (RefSeq) (-)-alpha-pinene synthase-like	Sesquiterpenoid and triterpenoid biosynthesis (ko00909)	--	--	Terpene synthase family, metal binding domain	(-)-alpha-pinene synthase OS=Fragaria vesca OX=57918 PE=1 SV=2	S	Function unknown	PREDICTED: (-)-alpha-pinene synthase-like [Prunus mume]	molecular function: binding (GO:0005488);; molecular function: catalytic activity (GO:0003824)
PaF106G0100004010.01	PaF106G0100004010.01	4.31287	258	5.84666	326	5.91581	385	3.30152	215	1.46957	80	2.71522	172	4.2653e-05	1.02906	up	up	up	up	8.58158e-06	up	4.2653e-05	1.02906	up	[Q]	Secondary metabolites biosynthesis, transport and catabolism	Molecular Function: D-galacturonate reductase activity (GO:0102098);;	K19642|3.9e-179|pmum:103320996|K19642 D-galacturonate reductase [EC:1.1.1.365] | (RefSeq) D-galacturonate reductase-like	Ascorbate and aldarate metabolism (ko00053)	[R]	General function prediction only	Aldo/keto reductase family	D-galacturonate reductase OS=Fragaria ananassa OX=3747 GN=GALUR PE=1 SV=1	S	Function unknown	unnamed protein product [Prunus armeniaca]	biological process: metabolic process (GO:0008152);; biological process: single-organism process (GO:0044699);; molecular function: catalytic activity (GO:0003824)
Prunus_sibirica_newGene_343	--	6.4213	270	8.97683	347	7.1965	306	2.13329	112	2.58619	98	1.85033	98	9.08916e-15	1.55169	up	up	up	up	5.02821e-16	up	9.08916e-15	1.55169	up	--	--	Molecular Function: RNA polymerase II core promoter proximal region sequence-specific DNA binding (GO:0000978);; Molecular Function: chromatin binding (GO:0003682);; Cellular Component: nucleus (GO:0005634);; Biological Process: pollen development (GO:0009555);; Molecular Function: protein dimerization activity (GO:0046983);; Biological Process: anther wall tapetum development (GO:0048658);;	--	--	--	--	--	--	K	Transcription	transcription factor ABORTED MICROSPORES [Prunus persica]	molecular function: binding (GO:0005488);; cellular component: cell (GO:0005623);; cellular component: organelle (GO:0043226);; cellular component: cell part (GO:0044464);; biological process: multicellular organismal process (GO:0032501);; biological process: developmental process (GO:0032502);; biological process: single-organism process (GO:0044699);; biological process: reproduction (GO:00000…
PaF106G0100006312.01	PaF106G0100006312.01	0	0	0.051507	4	0.01259	2	1.12146	92	1.16957	81	0.61174	49	2.66654e-14	-2.77975	down	down	down	down	1.54658e-15	down	2.66654e-14	-2.77975	down	--	--	Molecular Function: UDP-glycosyltransferase activity (GO:0008194);; Cellular Component: intracellular membrane-bounded organelle (GO:0043231);;	K22845|3.9e-167|pper:18789761|K22845 phlorizin synthase [EC:2.4.1.357] | (RefSeq) UDP-glycosyltransferase 88F5	Flavonoid biosynthesis (ko00941)	[GC]	Carbohydrate transport and metabolism;; Energy production and conversion	--	UDP-glycosyltransferase 88F5 OS=Malus domestica OX=3750 GN=UGT88F5 PE=2 SV=1	--	--	unnamed protein product [Prunus armeniaca]	molecular function: catalytic activity (GO:0003824);; cellular component: cell (GO:0005623);; cellular component: organelle (GO:0043226);; cellular component: cell part (GO:0044464)
PaF106G0700028684.01	PaF106G0700028684.01	1.21474	50	1.73793	67	1.55618	70	5.86192	263	7.14349	268	4.29807	187	8.16019e-12	-1.64895	down	down	down	down	5.87194e-13	down	8.16019e-12	-1.64895	down	--	--	Molecular Function: RNA polymerase II regulatory region sequence-specific DNA binding (GO:0000977);; Biological Process: regulation of transcription from RNA polymerase II promoter (GO:0006357);; Molecular Function: transcription factor binding (GO:0008134);; Molecular Function: protein dimerization activity (GO:0046983);; Cellular Component: RNA polymerase II transcription factor complex (GO:009…	--	--	--	--	Helix-loop-helix DNA-binding domain	Transcription factor ORG2 OS=Arabidopsis thaliana OX=3702 GN=ORG2 PE=1 SV=1	K	Transcription	unnamed protein product [Prunus armeniaca]	molecular function: binding (GO:0005488);; biological process: biological regulation (GO:0065007);; cellular component: cell (GO:0005623);; cellular component: macromolecular complex (GO:0032991);; cellular component: organelle (GO:0043226);; cellular component: organelle part (GO:0044422);; cellular component: cell part (GO:0044464)
PaF106G0100000860.01	PaF106G0100000860.01	8.73021	406	12.0021	520	10.2641	518	2.8218	143	7.37958	312	4.66607	229	8.32625e-05	1.00027	up	up	up	up	1.78456e-05	up	8.32625e-05	1.00027	up	--	--	Molecular Function: DNA binding (GO:0003677);; Molecular Function: protein dimerization activity (GO:0046983);;	K13422|5.5e-12|dct:110116479|K13422 transcription factor MYC2 | (RefSeq) transcription factor MYC2	MAPK signaling pathway - plant (ko04016);; Plant hormone signal transduction (ko04075)	--	--	Helix-loop-helix DNA-binding domain	Transcription factor bHLH35 OS=Arabidopsis thaliana OX=3702 GN=BHLH35 PE=2 SV=1	K	Transcription	PREDICTED: transcription factor bHLH35 [Prunus mume]	molecular function: binding (GO:0005488)
PaF106G0400015900.01	PaF106G0400015900.01	9.43889	846	16.1355	1351	14.1089	1376	294.878	28764	329.871	26913	311.681	29516	4.44358e-235	-4.33668	down	down	down	down	1.37331e-238	down	4.44358e-235	-4.33668	down	--	--	Molecular Function: magnesium ion binding (GO:0000287);; Molecular Function: terpene synthase activity (GO:0010333);;	K15803|0.0e+00|pmum:103343924|K15803 (-)-germacrene D synthase [EC:4.2.3.75] | (RefSeq) (-)-alpha-pinene synthase-like	Sesquiterpenoid and triterpenoid biosynthesis (ko00909)	--	--	Terpene synthase family, metal binding domain	(-)-alpha-pinene synthase OS=Fragaria vesca OX=57918 PE=1 SV=2	S	Function unknown	PREDICTED: (-)-alpha-pinene synthase-like [Prunus mume]	molecular function: binding (GO:0005488);; molecular function: catalytic activity (GO:0003824)
PaF106G0300011199.01	PaF106G0300011199.01	0.476293	83	0.744959	120	0.635723	120	1.79576	336	1.94064	303	1.38723	252	3.81227e-09	-1.26032	down	down	down	down	3.83702e-10	down	3.81227e-09	-1.26032	down	--	--	Molecular Function: nucleic acid binding (GO:0003676);; Molecular Function: helicase activity (GO:0004386);; Molecular Function: ATP binding (GO:0005524);;	K15271|3.7e-219|pmum:103330166|K15271 ATP-dependent DNA helicase HFM1/MER3 [EC:3.6.4.12] | (RefSeq) DExH-box ATP-dependent RNA helicase DExH17	--	[A]	RNA processing and modification	--	DExH-box ATP-dependent RNA helicase DExH17 OS=Arabidopsis thaliana OX=3702 GN=MER3 PE=2 SV=1	A	RNA processing and modification	PREDICTED: DExH-box ATP-dependent RNA helicase DExH17 [Prunus mume]	molecular function: binding (GO:0005488);; molecular function: catalytic activity (GO:0003824)
PaF106G0600024645.01	PaF106G0600024645.01	2.8557	113	3.05355	105	2.13474	96	1.10903	50	0.816714	29	0.871039	37	6.93987e-06	1.29366	up	up	up	up	1.19665e-06	up	6.93987e-06	1.29366	up	[Q]	Secondary metabolites biosynthesis, transport and catabolism	Molecular Function: oxidoreductase activity (GO:0016491);;	K00002|4.2e-181|pper:18773883|K00002 alcohol dehydrogenase (NADP+) [EC:1.1.1.2] | (RefSeq) aldo-keto reductase family 4 member C9	Glycolysis / Gluconeogenesis (ko00010);; Pentose and glucuronate interconversions (ko00040);; Glycerolipid metabolism (ko00561)	[R]	General function prediction only	Aldo/keto reductase family	NADPH-dependent aldo-keto reductase, chloroplastic OS=Arabidopsis thaliana OX=3702 GN=AKR4C9 PE=1 SV=1	L	Replication, recombination and repair	unnamed protein product [Prunus armeniaca]	molecular function: catalytic activity (GO:0003824)
PaF106G0600022188.01	PaF106G0600022188.01	0.15708	8	0.940079	41	1.07326	54	1.99325	101	3.22043	136	1.64701	81	0.00410208	-1.07803	down	down	down	down	0.00132107	down	0.00410208	-1.07803	down	[IQR]	Lipid transport and metabolism;; Secondary metabolites biosynthesis, transport and catabolism;; General function prediction only	Molecular Function: oxidoreductase activity (GO:0016491);;	K08081|7.2e-150|pper:18772283|K08081 tropinone reductase I [EC:1.1.1.206] | (RefSeq) tropinone reductase homolog At5g06060 isoform X1	Tropane, piperidine and pyridine alkaloid biosynthesis (ko00960)	[R]	General function prediction only	Enoyl-(Acyl carrier protein) reductase	Tropinone reductase homolog At5g06060 OS=Arabidopsis thaliana OX=3702 GN=At5g06060 PE=2 SV=1	Q	Secondary metabolites biosynthesis, transport and catabolism	unnamed protein product [Prunus armeniaca]	molecular function: catalytic activity (GO:0003824)
PaF106G0600023074.01	PaF106G0600023074.01	4.89106	191	9.65912	351	7.28646	309	1.35518	58	1.37617	49	2.21244	91	5.66289e-13	1.89138	up	up	up	up	3.65197e-14	up	5.66289e-13	1.89138	up	[IQR]	Lipid transport and metabolism;; Secondary metabolites biosynthesis, transport and catabolism;; General function prediction only	Molecular Function: oxidoreductase activity (GO:0016491);;	K13070|1.4e-76|dosa:Os04t0179200-01|K13070 momilactone-A synthase [EC:1.1.1.295] | (RefSeq) Os04g0179200, MAS, MOMILACTONE_A_SYNTHASE; Similar to Stem secoisolariciresinol dehydrogenase (Fragment).	Diterpenoid biosynthesis (ko00904)	[R]	General function prediction only	Enoyl-(Acyl carrier protein) reductase	Secoisolariciresinol dehydrogenase (Fragment) OS=Forsythia intermedia OX=55183 PE=1 SV=1	Q	Secondary metabolites biosynthesis, transport and catabolism	unnamed protein product [Prunus armeniaca]	molecular function: catalytic activity (GO:0003824)
PaF106G0400018009.01	PaF106G0400018009.01	2.30174	53	4.22195	90	3.85995	96	0.7561	19	0.395615	9	1.42008	35	6.53226e-05	1.42517	up	up	up	up	1.36271e-05	up	6.53226e-05	1.42517	up	[O]	Posttranslational modification, protein turnover, chaperones	Molecular Function: molecular_function (GO:0003674);; Molecular Function: protein disulfide isomerase activity (GO:0003756);; Molecular Function: catalytic activity (GO:0003824);; Molecular Function: thioredoxin-disulfide reductase activity (GO:0004791);; Cellular Component: cellular_component (GO:0005575);; Cellular Component: intracellular (GO:0005622);; Cellular Component: cell (GO:0005623);; …	K03671|2.0e-65|pmum:103324584|K03671 thioredoxin 1 | (RefSeq) thioredoxin-like protein CXXS1	--	[O]	Posttranslational modification, protein turnover, chaperones	Thioredoxin	Thioredoxin-like protein CXXS1 OS=Arabidopsis thaliana OX=3702 GN=CXXS1 PE=2 SV=2	O	Posttranslational modification, protein turnover, chaperones	unnamed protein product [Prunus armeniaca]	molecular function: catalytic activity (GO:0003824);; biological process: metabolic process (GO:0008152);; biological process: cellular process (GO:0009987);; biological process: single-organism process (GO:0044699);; biological process: response to stimulus (GO:0050896);; biological process: detoxification (GO:0098754);; molecular function: antioxidant activity (GO:0016209);; cellular component:…
PaF106G0500020850.01	PaF106G0500020850.01	2.75384	132	3.45814	155	4.05722	211	1.56175	82	1.40079	61	1.66692	85	7.10147e-06	1.08018	up	up	up	up	1.22686e-06	up	7.10147e-06	1.08018	up	--	--	--	--	--	--	--	Remorin, C-terminal region	--	S	Function unknown	unnamed protein product [Prunus armeniaca]	--
PaF106G0400016816.01	PaF106G0400016816.01	0.163245	15	0	0	0.07576	8	3.89706	371	1.98606	158	2.58208	238	0.00190411	-1.16037	down	down	down	down	0.0005616	down	0.00190411	-1.16037	down	--	--	Molecular Function: magnesium ion binding (GO:0000287);; Molecular Function: terpene synthase activity (GO:0010333);;	K14173|0.0e+00|pmum:103325568|K14173 alpha-farnesene synthase [EC:4.2.3.46] | (RefSeq) (E,E)-alpha-farnesene synthase-like	Sesquiterpenoid and triterpenoid biosynthesis (ko00909)	--	--	Terpene synthase family, metal binding domain	(E,E)-alpha-farnesene synthase OS=Malus domestica OX=3750 GN=AFS1 PE=1 SV=2	S	Function unknown	unnamed protein product [Prunus armeniaca]	molecular function: binding (GO:0005488);; molecular function: catalytic activity (GO:0003824)
PaF106G0800032576.01	PaF106G0800032576.01	5.77375	291	3.25958	157	5.69557	310	1.1453	62	0.850635	41	0.843802	51	8.16492e-17	2.07741	up	up	up	up	3.844e-18	up	8.16492e-17	2.07741	up	[P]	Inorganic ion transport and metabolism	Molecular Function: carbonate dehydratase activity (GO:0004089);; Molecular Function: zinc ion binding (GO:0008270);; Biological Process: cyanate catabolic process (GO:0009440);; Biological Process: carbon utilization (GO:0015976);;	K01673|1.5e-144|pmum:103341852|K01673 carbonic anhydrase [EC:4.2.1.1] | (RefSeq) carbonic anhydrase 2-like	Nitrogen metabolism (ko00910)	[P]	Inorganic ion transport and metabolism	Carbonic anhydrase	Beta carbonic anhydrase 2, chloroplastic OS=Arabidopsis thaliana OX=3702 GN=BCA2 PE=1 SV=3	P	Inorganic ion transport and metabolism	unnamed protein product [Prunus armeniaca]	molecular function: catalytic activity (GO:0003824);; molecular function: binding (GO:0005488);; biological process: metabolic process (GO:0008152);; biological process: cellular process (GO:0009987);; biological process: single-organism process (GO:0044699)
PaF106G0800031052.01	PaF106G0800031052.01	4.41711	437	4.91097	449	5.55794	588	11.9476	1271	12.9339	1122	11.2081	1136	2.05387e-24	-1.15173	down	down	down	down	6.00906e-26	down	2.05387e-24	-1.15173	down	--	--	Molecular Function: protein kinase activity (GO:0004672);; Molecular Function: ATP binding (GO:0005524);; Cellular Component: integral component of membrane (GO:0016021);;	K01180|7.5e-15|cmax:111487562|K01180 endo-1,3(4)-beta-glucanase [EC:3.2.1.6] | (RefSeq) uncharacterized protein LOC111487562	--	[T]	Signal transduction mechanisms	SPARK	Probable receptor-like protein kinase At1g49730 OS=Arabidopsis thaliana OX=3702 GN=At1g49730 PE=2 SV=1	T	Signal transduction mechanisms	PREDICTED: probable receptor-like protein kinase At1g49730 isoform X2 [Prunus mume]	biological process: metabolic process (GO:0008152);; biological process: cellular process (GO:0009987);; molecular function: catalytic activity (GO:0003824);; molecular function: binding (GO:0005488);; cellular component: membrane (GO:0016020);; cellular component: membrane part (GO:0044425)
Prunus_sibirica_newGene_1180	--	0.998754	88	0.989668	81	1.00317	96	0.182248	18	0.283502	23	0.380784	36	2.91228e-06	1.4727	up	up	up	up	4.65329e-07	up	2.91228e-06	1.4727	up	--	--	Cellular Component: integral component of membrane (GO:0016021);; Molecular Function: protein dimerization activity (GO:0046983);;	--	--	--	--	--	--	K	Transcription	transcription factor ABORTED MICROSPORES [Prunus yedoensis var. nudiflora]	cellular component: membrane (GO:0016020);; cellular component: membrane part (GO:0044425);; molecular function: binding (GO:0005488)
PaF106G0500020561.01	PaF106G0500020561.01	3.34052	84	5.44598	128	4.35884	119	1.36808	38	1.98158	46	1.98324	53	0.000113596	1.13048	up	up	up	up	2.50257e-05	up	0.000113596	1.13048	up	--	--	Molecular Function: RNA polymerase II regulatory region sequence-specific DNA binding (GO:0000977);; Biological Process: regulation of transcription from RNA polymerase II promoter (GO:0006357);; Molecular Function: transcription factor binding (GO:0008134);; Molecular Function: protein dimerization activity (GO:0046983);; Cellular Component: RNA polymerase II transcription factor complex (GO:009…	--	--	--	--	Helix-loop-helix DNA-binding domain	Transcription factor bHLH162 OS=Arabidopsis thaliana OX=3702 GN=BHLH162 PE=1 SV=1	K	Transcription	PREDICTED: uncharacterized protein LOC103338332 isoform X1 [Prunus mume]	molecular function: binding (GO:0005488);; biological process: biological regulation (GO:0065007);; cellular component: cell (GO:0005623);; cellular component: macromolecular complex (GO:0032991);; cellular component: organelle (GO:0043226);; cellular component: organelle part (GO:0044422);; cellular component: cell part (GO:0044464)
PaF106G0600023099.01	PaF106G0600023099.01	19.5771	1216	20.8402	1200	22.5728	1517	7.91779	564	7.68837	445	6.63779	440	3.58875e-41	1.49119	up	up	up	up	4.86166e-43	up	3.58875e-41	1.49119	up	[R]	General function prediction only	Molecular Function: oxidoreductase activity (GO:0016491);;	K01456|3.8e-161|pper:18774423|K01456 peptide-N4-(N-acetyl-beta-glucosaminyl)asparagine amidase [EC:3.5.1.52] | (RefSeq) peptide-N(4)-(N-acetyl-beta- glucosaminyl)asparagine amidase isoform X1	Protein processing in endoplasmic reticulum (ko04141)	[C]	Energy production and conversion	Aldo/keto reductase family	Probable aldo-keto reductase 1 OS=Glycine max OX=3847 GN=AKR1 PE=2 SV=1	C	Energy production and conversion	hypothetical protein PRUPE_6G141300 [Prunus persica]	molecular function: catalytic activity (GO:0003824)
PaF106G0700027943.01	PaF106G0700027943.01	0.589332	27	0.453392	19	0.607283	30	1.59182	77	2.02195	81	1.25726	59	0.000629712	-1.12401	down	down	down	down	0.00016484	down	0.000629712	-1.12401	down	[IQR]	Lipid transport and metabolism;; Secondary metabolites biosynthesis, transport and catabolism;; General function prediction only	Molecular Function: oxidoreductase activity (GO:0016491);;	K13070|1.3e-82|dosa:Os04t0179200-01|K13070 momilactone-A synthase [EC:1.1.1.295] | (RefSeq) Os04g0179200, MAS, MOMILACTONE_A_SYNTHASE; Similar to Stem secoisolariciresinol dehydrogenase (Fragment).	Diterpenoid biosynthesis (ko00904)	[R]	General function prediction only	Enoyl-(Acyl carrier protein) reductase	Secoisolariciresinol dehydrogenase (Fragment) OS=Forsythia intermedia OX=55183 PE=1 SV=1	Q	Secondary metabolites biosynthesis, transport and catabolism	unnamed protein product [Prunus armeniaca]	molecular function: catalytic activity (GO:0003824)
PaF106G0500018861.01	PaF106G0500018861.01	1.89339	129	1.38039	88	1.06438	79	12.8343	945	8.11742	500	12.1283	866	7.62468e-33	-2.57539	down	down	down	down	1.42172e-34	down	7.62468e-33	-2.57539	down	--	--	Molecular Function: transmembrane receptor protein serine/threonine kinase activity (GO:0004675);; Molecular Function: ATP binding (GO:0005524);; Cellular Component: plasma membrane (GO:0005886);; Biological Process: protein phosphorylation (GO:0006468);; Cellular Component: integral component of membrane (GO:0016021);;	K13430|1.4e-37|ghi:107911736|K13430 serine/threonine-protein kinase PBS1 [EC:2.7.11.1] | (RefSeq) serine/threonine-protein kinase CDL1-like	Plant-pathogen interaction (ko04626)	[T]	Signal transduction mechanisms	Protein tyrosine and serine/threonine kinase	Receptor-like cytoplasmic kinase 185 OS=Oryza sativa subsp. japonica OX=39947 GN=RLCK185 PE=1 SV=1	T	Signal transduction mechanisms	PREDICTED: serine/threonine-protein kinase CDL1-like [Prunus mume]	biological process: metabolic process (GO:0008152);; biological process: cellular process (GO:0009987);; biological process: signaling (GO:0023052);; biological process: single-organism process (GO:0044699);; biological process: response to stimulus (GO:0050896);; biological process: biological regulation (GO:0065007);; molecular function: catalytic activity (GO:0003824);; molecular function: sig…
PaF106G0100004439.01	PaF106G0100004439.01	10.5322	851	12.7774	942	13.0479	1131	5.44016	462	4.61972	336	4.4906	376	5.82149e-28	1.36558	up	up	up	up	1.36437e-29	up	5.82149e-28	1.36558	up	--	--	Molecular Function: transcriptional activator activity, RNA polymerase II transcription regulatory region sequence-specific binding (GO:0001228);; Cellular Component: nucleus (GO:0005634);; Molecular Function: protein dimerization activity (GO:0046983);;	--	--	--	--	--	--	K	Transcription	unnamed protein product [Prunus armeniaca]	biological process: biological regulation (GO:0065007);; molecular function: nucleic acid binding transcription factor activity (GO:0001071);; cellular component: cell (GO:0005623);; cellular component: organelle (GO:0043226);; cellular component: cell part (GO:0044464);; molecular function: binding (GO:0005488)
PaF106G0400016135.01	PaF106G0400016135.01	0.066944	5	0.236047	14	0.206482	14	2.66733	178	2.62131	147	2.55895	166	2.25321e-25	-3.03111	down	down	down	down	6.32532e-27	down	2.25321e-25	-3.03111	down	[W]	Extracellular structures	Molecular Function: protein kinase activity (GO:0004672);; Molecular Function: ATP binding (GO:0005524);; Molecular Function: carbohydrate binding (GO:0030246);;	K22133|4.5e-49|egr:104443803|K22133 oxalate---CoA ligase [EC:6.2.1.8] | (RefSeq) oxalate--CoA ligase isoform X2	Glyoxylate and dicarboxylate metabolism (ko00630)	--	--	Protein kinase domain	L-type lectin-domain containing receptor kinase IX.1 OS=Arabidopsis thaliana OX=3702 GN=LECRK91 PE=1 SV=1	T	Signal transduction mechanisms	L-type lectin-domain containing receptor kinase IX.1-like [Prunus avium]	biological process: metabolic process (GO:0008152);; biological process: cellular process (GO:0009987);; molecular function: catalytic activity (GO:0003824);; molecular function: binding (GO:0005488)
PaF106G0800030644.01	PaF106G0800030644.01	7.38255	129	12.001	196	10.8992	207	3.62344	69	3.61314	58	3.07055	57	1.03711e-08	1.42473	up	up	up	up	1.1058e-09	up	1.03711e-08	1.42473	up	[O]	Posttranslational modification, protein turnover, chaperones	Cellular Component: cellular_component (GO:0005575);; Cellular Component: intracellular (GO:0005622);; Cellular Component: cell (GO:0005623);; Cellular Component: nucleus (GO:0005634);; Cellular Component: cytoplasm (GO:0005737);; Cellular Component: chloroplast (GO:0009507);; Cellular Component: plastid (GO:0009536);; Cellular Component: organelle (GO:0043226);; Cellular Component: membrane-boun…	K03686|4.3e-11|bvg:104900630|K03686 molecular chaperone DnaJ | (RefSeq) chaperone protein dnaJ A6, chloroplastic	--	[O]	Posttranslational modification, protein turnover, chaperones	DnaJ domain	Chaperone protein dnaJ 11, chloroplastic OS=Arabidopsis thaliana OX=3702 GN=ATJ11 PE=1 SV=2	O	Posttranslational modification, protein turnover, chaperones	unnamed protein product [Prunus armeniaca]	cellular component: cell (GO:0005623);; cellular component: cell part (GO:0044464);; cellular component: organelle (GO:0043226)
PaF106G0200006904.01	PaF106G0200006904.01	0.674167	34	0.290666	19	0.388726	17	1.01913	79	0.994394	59	0.946677	69	0.0015964	-1.09125	down	down	down	down	0.000461306	down	0.0015964	-1.09125	down	--	--	Biological Process: regulation of mitochondrial RNA catabolic process (GO:0000960);; Biological Process: positive regulation of mitochondrial RNA catabolic process (GO:0000962);; Molecular Function: molecular_function (GO:0003674);; Molecular Function: nucleic acid binding (GO:0003676);; Molecular Function: RNA binding (GO:0003723);; Molecular Function: catalytic activity (GO:0003824);; Molecular…	K23541|2.1e-21|qsu:111985060|K23541 Ca2+/H+ antiporter, TMEM165/GDT1 family | (RefSeq) pentatricopeptide repeat-containing protein At4g21065-like	--	[R]	General function prediction only	PPR repeat family	Pentatricopeptide repeat-containing protein At4g32430, mitochondrial OS=Arabidopsis thaliana OX=3702 GN=PCMP-E40 PE=2 SV=1	S	Function unknown	pentatricopeptide repeat-containing protein At4g32430, mitochondrial-like [Prunus avium]	biological process: biological regulation (GO:0065007);; molecular function: binding (GO:0005488);; molecular function: catalytic activity (GO:0003824);; biological process: metabolic process (GO:0008152);; biological process: cellular process (GO:0009987);; cellular component: cell (GO:0005623);; cellular component: cell part (GO:0044464);; cellular component: organelle (GO:0043226)
PaF106G0200007121.01	PaF106G0200007121.01	3.57425	267	2.30011	160	3.28384	266	0.880551	72	1.05023	72	0.777807	62	7.15657e-12	1.62424	up	up	up	up	5.10183e-13	up	7.15657e-12	1.62424	up	[C]	Energy production and conversion	Biological Process: cytokinin metabolic process (GO:0009690);; Molecular Function: cytokinin dehydrogenase activity (GO:0019139);; Molecular Function: FAD binding (GO:0071949);;	K00279|1.5e-311|pper:18784595|K00279 cytokinin dehydrogenase [EC:1.5.99.12] | (RefSeq) cytokinin dehydrogenase 6	Zeatin biosynthesis (ko00908)	[C]	Energy production and conversion	Cytokinin dehydrogenase 1, FAD and cytokinin binding	Cytokinin dehydrogenase 6 OS=Arabidopsis thaliana OX=3702 GN=CKX6 PE=2 SV=2	C	Energy production and conversion	unnamed protein product [Prunus armeniaca]	biological process: metabolic process (GO:0008152);; biological process: cellular process (GO:0009987);; biological process: biological regulation (GO:0065007);; biological process: single-organism process (GO:0044699);; molecular function: catalytic activity (GO:0003824);; molecular function: binding (GO:0005488)
PaF106G0300012720.01	PaF106G0300012720.01	7.52433	307	3.45188	132	5.4487	242	0.30038	14	0.253691	10	0.153378	7	6.42792e-31	3.49184	up	up	up	up	1.29198e-32	up	6.42792e-31	3.49184	up	--	--	Molecular Function: protein dimerization activity (GO:0046983);;	K12126|8.5e-08|jre:109000498|K12126 phytochrome-interacting factor 3 | (RefSeq) transcription factor PIF3-like	Plant hormone signal transduction (ko04075);; Circadian rhythm - plant (ko04712)	--	--	Helix-loop-helix DNA-binding domain	Transcription factor RHD6 OS=Arabidopsis thaliana OX=3702 GN=RHD6 PE=1 SV=1	K	Transcription	unnamed protein product [Prunus armeniaca]	molecular function: binding (GO:0005488)
PaF106G0100000807.01	PaF106G0100000807.01	7.1806	291	6.82889	258	7.19692	317	3.69285	163	3.63641	134	3.00131	128	6.49342e-09	1.04883	up	up	up	up	6.70614e-10	up	6.49342e-09	1.04883	up	--	--	Cellular Component: mitochondrion (GO:0005739);; Biological Process: RNA modification (GO:0009451);; Cellular Component: intracellular membrane-bounded organelle (GO:0043231);;	K22262|5.8e-31|qsu:112034235|K22262 WD repeat and FYVE domain-containing protein 3 | (RefSeq) protein SPIRRIG	--	[R]	General function prediction only	PPR repeat family	Putative pentatricopeptide repeat-containing protein At3g15130 OS=Arabidopsis thaliana OX=3702 GN=PCMP-H86 PE=3 SV=1	S	Function unknown	putative pentatricopeptide repeat-containing protein At3g25970 [Prunus dulcis]	cellular component: cell (GO:0005623);; cellular component: organelle (GO:0043226);; cellular component: cell part (GO:0044464);; biological process: metabolic process (GO:0008152);; biological process: cellular process (GO:0009987)
PaF106G0100000612.01	PaF106G0100000612.01	0.5783	49	0.305348	24	0.572844	52	2.07786	189	2.52465	192	1.73781	153	1.92428e-10	-1.72507	down	down	down	down	1.63247e-11	down	1.92428e-10	-1.72507	down	--	--	--	K22733|1.1e-103|cit:102612526|K22733 magnesium transporter | (RefSeq) uncharacterized protein LOC102612526	--	[R]	General function prediction only	PPR repeat family	Pentatricopeptide repeat-containing protein At3g57430, chloroplastic OS=Arabidopsis thaliana OX=3702 GN=PCMP-H81 PE=2 SV=2	S	Function unknown	unnamed protein product [Prunus armeniaca]	--
PaF106G0100003722.01	PaF106G0100003722.01	0.520798	23	0.327111	14	1.35271	65	3.38985	162	2.45856	98	2.85202	132	3.23799e-05	-1.41355	down	down	down	down	6.34622e-06	down	3.23799e-05	-1.41355	down	--	--	Cellular Component: nucleus (GO:0005634);; Biological Process: regulation of transcription, DNA-templated (GO:0006355);; Molecular Function: protein dimerization activity (GO:0046983);; Biological Process: positive regulation of brassinosteroid biosynthetic process (GO:2000488);;	K18878|1.2e-25|cann:107866053|K18878 BHLH transcription factor Upa20 | (RefSeq) Upa20; transcription factor bHLH137-like	Plant-pathogen interaction (ko04626)	--	--	Helix-loop-helix DNA-binding domain	Transcription factor bHLH75 OS=Arabidopsis thaliana OX=3702 GN=BHLH75 PE=2 SV=1	K	Transcription	unnamed protein product [Prunus armeniaca]	cellular component: cell (GO:0005623);; cellular component: organelle (GO:0043226);; cellular component: cell part (GO:0044464);; biological process: biological regulation (GO:0065007);; molecular function: binding (GO:0005488)
PaF106G0600021566.01	PaF106G0600021566.01	2.57303	298	2.21069	239	2.76122	348	0.413644	53	0.235091	25	0.374087	46	9.25449e-31	2.6173	up	up	up	up	1.8734e-32	up	9.25449e-31	2.6173	up	--		Molecular Function: protein serine/threonine kinase activity (GO:0004674);; Molecular Function: ATP binding (GO:0005524);; Cellular Component: integral component of membrane (GO:0016021);; Molecular Function: carbohydrate binding (GO:0030246);; Biological Process: recognition of pollen (GO:0048544);;	K13416|6.6e-58|mdm:103416332|K13416 brassinosteroid insensitive 1-associated receptor kinase 1 [EC:2.7.10.1 2.7.11.1] | (RefSeq) BRASSINOSTEROID INSENSITIVE 1-associated receptor kinase 1-like isoform X1	MAPK signaling pathway - plant (ko04016);; Plant hormone signal transduction (ko04075);; Plant-pathogen interaction (ko04626)	--	--	Protein kinase domain	G-type lectin S-receptor-like serine/threonine-protein kinase RLK1 OS=Arabidopsis thaliana OX=3702 GN=RLK1 PE=2 SV=2	T	Signal transduction mechanisms	PREDICTED: G-type lectin S-receptor-like serine/threonine-protein kinase RLK1 [Prunus mume]	biological process: metabolic process (GO:0008152);; biological process: cellular process (GO:0009987);; molecular function: catalytic activity (GO:0003824);; molecular function: binding (GO:0005488);; cellular component: membrane (GO:0016020);; cellular component: membrane part (GO:0044425);; biological process: reproduction (GO:0000003);; biological process: reproductive process (GO:0022414);; …
PaF106G0300011264.01	PaF106G0300011264.01	6.62666	460	7.49326	483	8.43773	635	3.54067	266	4.27347	266	3.71504	273	2.33745e-11	1.00414	up	up	up	up	1.77951e-12	up	2.33745e-11	1.00414	up	[T]	Signal transduction mechanisms	Molecular Function: transmembrane receptor protein serine/threonine kinase activity (GO:0004675);; Molecular Function: ATP binding (GO:0005524);; Cellular Component: plasma membrane (GO:0005886);; Biological Process: protein phosphorylation (GO:0006468);;	K13435|4.0e-51|spen:107018783|K13435 serine/threonine-protein kinase Pto | (RefSeq) receptor-like protein kinase HERK 1 isoform X2	Plant-pathogen interaction (ko04626)	[T]	Signal transduction mechanisms	Protein kinase domain	Nodulation receptor kinase OS=Medicago truncatula OX=3880 GN=NORK PE=1 SV=2	T	Signal transduction mechanisms	hypothetical protein PRUPE_3G282300, partial [Prunus persica]	biological process: metabolic process (GO:0008152);; biological process: cellular process (GO:0009987);; biological process: signaling (GO:0023052);; biological process: single-organism process (GO:0044699);; biological process: response to stimulus (GO:0050896);; biological process: biological regulation (GO:0065007);; molecular function: catalytic activity (GO:0003824);; molecular function: sig…
PaF106G0100003267.01	PaF106G0100003267.01	2.68449	104	3.4601	125	3.26003	136	8.90003	343	10.9525	364	7.01134	289	2.34557e-10	-1.26833	down	down	down	down	2.00801e-11	down	2.34557e-10	-1.26833	down	--	--	Biological Process: response to water deprivation (GO:0009414);; Cellular Component: plasmodesma (GO:0009506);; Biological Process: response to abscisic acid (GO:0009737);; Cellular Component: integral component of membrane (GO:0016021);; Biological Process: hyperosmotic salinity response (GO:0042538);;	K17279|2.4e-101|pmum:103321596|K17279 receptor expression-enhancing protein 5/6 | (RefSeq) HVA22-like protein c	--	[U]	Intracellular trafficking, secretion, and vesicular transport	TB2/DP1, HVA22 family	HVA22-like protein c OS=Arabidopsis thaliana OX=3702 GN=HVA22C PE=2 SV=1	U	Intracellular trafficking, secretion, and vesicular transport	unnamed protein product [Prunus armeniaca]	biological process: response to stimulus (GO:0050896);; cellular component: cell junction (GO:0030054);; cellular component: membrane (GO:0016020);; cellular component: membrane part (GO:0044425)
PaF106G0200006798.01	PaF106G0200006798.01	0	0	0	0	0	0	1.14201	98	0.575734	42	0.602068	51	2.57697e-15	-2.95264	down	down	down	down	1.36454e-16	down	2.57697e-15	-2.95264	down	--	--	--	--	--	--	--	Plant protein of unknown function (DUF936)	--	S	Function unknown	unnamed protein product [Prunus armeniaca]	--
PaF106G0800032869.01	PaF106G0800032869.01	1.0601	106	0.740343	70	0.769152	84	1.84667	202	2.40399	218	1.89522	201	8.49638e-06	-1.05293	down	down	down	down	1.49017e-06	down	8.49638e-06	-1.05293	down	--	--	Molecular Function: zinc ion binding (GO:0008270);; Biological Process: RNA modification (GO:0009451);; Cellular Component: intracellular membrane-bounded organelle (GO:0043231);;	K13800|3.2e-28|csv:101217681|K13800 UMP-CMP kinase [EC:2.7.4.14] | (RefSeq) UMP-CMP kinase isoform X1	Pyrimidine metabolism (ko00240)	[R]	General function prediction only	PPR repeat	Pentatricopeptide repeat-containing protein At1g71420 OS=Arabidopsis thaliana OX=3702 GN=PCMP-H70 PE=2 SV=1	S	Function unknown	PREDICTED: pentatricopeptide repeat-containing protein At1g71420 [Prunus mume]	molecular function: binding (GO:0005488);; biological process: metabolic process (GO:0008152);; biological process: cellular process (GO:0009987);; cellular component: cell (GO:0005623);; cellular component: organelle (GO:0043226);; cellular component: cell part (GO:0044464)
PaF106G0600023320.01	PaF106G0600023320.01	1.53266	63	1.35367	52	1.38693	62	3.41962	153	4.09333	153	2.74803	120	5.87774e-05	-1.03865	down	down	down	down	1.21436e-05	down	5.87774e-05	-1.03865	down	--	--	Molecular Function: protein dimerization activity (GO:0046983);;	K12126|1.2e-07|obr:102711850|K12126 phytochrome-interacting factor 3 | (RefSeq) transcription factor APG-like	Plant hormone signal transduction (ko04075);; Circadian rhythm - plant (ko04712)	--	--	Helix-loop-helix DNA-binding domain	Transcription factor HEC3 OS=Arabidopsis thaliana OX=3702 GN=HEC3 PE=1 SV=1	K	Transcription	unnamed protein product [Prunus armeniaca]	molecular function: binding (GO:0005488)
PaF106G0200006908.01	PaF106G0200006908.01	1.36819	104	1.04074	74	0.731442	61	0.378474	32	0.352722	25	0.130355	11	8.0476e-05	1.38511	up	up	up	up	1.71531e-05	up	8.0476e-05	1.38511	up	--	--	Biological Process: regulation of mitochondrial RNA catabolic process (GO:0000960);; Biological Process: positive regulation of mitochondrial RNA catabolic process (GO:0000962);; Molecular Function: molecular_function (GO:0003674);; Molecular Function: nucleic acid binding (GO:0003676);; Molecular Function: RNA binding (GO:0003723);; Molecular Function: catalytic activity (GO:0003824);; Molecular…	K03798|4.4e-56|pda:103716421|K03798 cell division protease FtsH [EC:3.4.24.-] | (RefSeq) ATP-dependent zinc metalloprotease FTSH 6, chloroplastic-like	--	[R]	General function prediction only	PPR repeat family	Pentatricopeptide repeat-containing protein At4g32430, mitochondrial OS=Arabidopsis thaliana OX=3702 GN=PCMP-E40 PE=2 SV=1	S	Function unknown	pentatricopeptide repeat-containing protein At4g32430, mitochondrial-like [Prunus avium]	biological process: biological regulation (GO:0065007);; molecular function: binding (GO:0005488);; molecular function: catalytic activity (GO:0003824);; biological process: metabolic process (GO:0008152);; biological process: cellular process (GO:0009987);; cellular component: cell (GO:0005623);; cellular component: cell part (GO:0044464);; cellular component: organelle (GO:0043226)
PaF106G0600023103.01	PaF106G0600023103.01	0.160726	16	0.37313	33	0.395451	41	2.65941	271	3.10806	265	3.40314	336	2.05978e-28	-2.77033	down	down	down	down	4.6683e-30	down	2.05978e-28	-2.77033	down	--		Molecular Function: protein serine/threonine kinase activity (GO:0004674);; Molecular Function: ATP binding (GO:0005524);; Molecular Function: polysaccharide binding (GO:0030247);;	K13416|3.2e-48|bna:106376693|K13416 brassinosteroid insensitive 1-associated receptor kinase 1 [EC:2.7.10.1 2.7.11.1] | (RefSeq) BRASSINOSTEROID INSENSITIVE 1-associated receptor kinase 1-like isoform X1	MAPK signaling pathway - plant (ko04016);; Plant hormone signal transduction (ko04075);; Plant-pathogen interaction (ko04626)	--	--	Protein kinase domain	Rust resistance kinase Lr10 OS=Triticum aestivum OX=4565 GN=LRK10 PE=2 SV=1	T	Signal transduction mechanisms	PREDICTED: rust resistance kinase Lr10-like [Prunus mume]	biological process: metabolic process (GO:0008152);; biological process: cellular process (GO:0009987);; molecular function: catalytic activity (GO:0003824);; molecular function: binding (GO:0005488)
PaF106G0200008157.01	PaF106G0200008157.01	0.339845	28	0.444854	34	0.51586	46	1.28702	114	1.22606	91	1.06721	92	7.22751e-05	-1.15248	down	down	down	down	1.52264e-05	down	7.22751e-05	-1.15248	down	--		Molecular Function: protein kinase activity (GO:0004672);; Molecular Function: ATP binding (GO:0005524);; Cellular Component: integral component of membrane (GO:0016021);;	K13418|1.7e-47|ppp:112280019|K13418 somatic embryogenesis receptor kinase 1 [EC:2.7.10.1 2.7.11.1] | (RefSeq) LRR receptor kinase BAK1-like	--	[T]	Signal transduction mechanisms	Protein kinase domain	Rust resistance kinase Lr10 OS=Triticum aestivum OX=4565 GN=LRK10 PE=2 SV=1	T	Signal transduction mechanisms	PREDICTED: rust resistance kinase Lr10-like [Prunus mume]	biological process: metabolic process (GO:0008152);; biological process: cellular process (GO:0009987);; molecular function: catalytic activity (GO:0003824);; molecular function: binding (GO:0005488);; cellular component: membrane (GO:0016020);; cellular component: membrane part (GO:0044425)
PaF106G0700026355.01	PaF106G0700026355.01	2.40647	64	3.54612	87	4.611	132	1.17986	34	1.56589	38	1.6267	45	0.000525094	1.08108	up	up	up	up	0.000135047	up	0.000525094	1.08108	up	--	--	Molecular Function: motor activity (GO:0003774);; Cellular Component: cytoplasm (GO:0005737);; Cellular Component: microtubule (GO:0005874);; Biological Process: microtubule-based process (GO:0007017);; Cellular Component: dynein complex (GO:0030286);;	K10418|5.5e-49|pmum:103340973|K10418 dynein light chain LC8-type | (RefSeq) dynein light chain LC6, flagellar outer arm-like	--	[Z]	Cytoskeleton	Dynein light chain type 1	Dynein 8 kDa light chain, flagellar outer arm OS=Chlamydomonas reinhardtii OX=3055 PE=1 SV=1	Z	Cytoskeleton	PREDICTED: dynein light chain LC6, flagellar outer arm-like [Prunus mume]	molecular function: catalytic activity (GO:0003824);; cellular component: cell (GO:0005623);; cellular component: cell part (GO:0044464);; cellular component: organelle (GO:0043226);; cellular component: organelle part (GO:0044422);; cellular component: supramolecular complex (GO:0099080);; biological process: cellular process (GO:0009987);; cellular component: macromolecular complex (GO:0032991)
PaF106G0800032611.01	PaF106G0800032611.01	1.20396	115	1.43227	127	2.40037	248	0.783425	81	0.886571	77	0.575349	58	0.000199525	1.04945	up	up	up	up	4.66209e-05	up	0.000199525	1.04945	up	--	--	Biological Process: telomere maintenance (GO:0000723);; Molecular Function: DNA helicase activity (GO:0003678);; Molecular Function: ATP binding (GO:0005524);; Biological Process: DNA repair (GO:0006281);; Biological Process: DNA recombination (GO:0006310);;	K07466|2.7e-189|pper:18792188|K07466 replication factor A1 | (RefSeq) replication protein A 70 kDa DNA-binding subunit B	DNA replication (ko03030);; Nucleotide excision repair (ko03420);; Mismatch repair (ko03430);; Homologous recombination (ko03440)	--	--	Replication protein A OB domain	--	D	Cell cycle control, cell division, chromosome partitioning	unnamed protein product [Prunus armeniaca]	biological process: metabolic process (GO:0008152);; biological process: cellular process (GO:0009987);; biological process: biological regulation (GO:0065007);; biological process: cellular component organization or biogenesis (GO:0071840);; molecular function: catalytic activity (GO:0003824);; molecular function: binding (GO:0005488);; biological process: response to stimulus (GO:0050896)
PaF106G0600023102.01	PaF106G0600023102.01	0.546058	42	0.893436	63	0.542097	45	5.21281	428	3.7289	256	3.95261	315	7.78055e-24	-2.33293	down	down	down	down	2.33649e-25	down	7.78055e-24	-2.33293	down	--		Molecular Function: protein kinase activity (GO:0004672);; Molecular Function: ATP binding (GO:0005524);; Cellular Component: integral component of membrane (GO:0016021);;	K13416|3.1e-46|egr:104419928|K13416 brassinosteroid insensitive 1-associated receptor kinase 1 [EC:2.7.10.1 2.7.11.1] | (RefSeq) BRASSINOSTEROID INSENSITIVE 1-associated receptor kinase 1	MAPK signaling pathway - plant (ko04016);; Plant hormone signal transduction (ko04075);; Plant-pathogen interaction (ko04626)	[T]	Signal transduction mechanisms	Protein kinase domain	Rust resistance kinase Lr10 OS=Triticum aestivum OX=4565 GN=LRK10 PE=2 SV=1	T	Signal transduction mechanisms	rust resistance kinase Lr10-like isoform X1 [Prunus avium]	biological process: metabolic process (GO:0008152);; biological process: cellular process (GO:0009987);; molecular function: catalytic activity (GO:0003824);; molecular function: binding (GO:0005488);; cellular component: membrane (GO:0016020);; cellular component: membrane part (GO:0044425)
PaF106G0400015872.01	PaF106G0400015872.01	0.462622	42	0.668395	56	0.79927	78	2.04362	199	1.77797	145	1.8888	172	1.86995e-07	-1.29616	down	down	down	down	2.44556e-08	down	1.86995e-07	-1.29616	down	--	--	Molecular Function: magnesium ion binding (GO:0000287);; Molecular Function: terpene synthase activity (GO:0010333);;	K15803|2.0e-308|pavi:110768307|K15803 (-)-germacrene D synthase [EC:4.2.3.75] | (RefSeq) (-)-alpha-pinene synthase-like isoform X1	Sesquiterpenoid and triterpenoid biosynthesis (ko00909)	--	--	Terpene synthase family, metal binding domain	(-)-alpha-pinene synthase OS=Fragaria vesca OX=57918 PE=1 SV=2	S	Function unknown	PREDICTED: (-)-alpha-pinene synthase-like [Prunus mume]	molecular function: binding (GO:0005488);; molecular function: catalytic activity (GO:0003824)
