# Supplementary material for: Mining for genes related to pistil abortion in Prunus sibirica L
Source: PeerJ. 2022 Nov 15;10:e14366. doi: 10.7717/peerj.14366 (PMC9673769; doi:10.7717/peerj.14366)
Supplement: Table S16 [file peerj-10-14366-s016.xls]

## Sheet: Sheet1
Table S16 The DEGs in B3 transcription factor family
#ID	gene_name	APt1_FPKM	APt2_FPKM	APt3_FPKM	NPt1_FPKM	NPt2_FPKM	NPt3_FPKM	NPt1_NPt2_NPt3_vs_APt1_APt2_APt3_DESeq2_log2FC	NPt1_NPt2_NPt3_vs_APt1_APt2_APt3_DESeq2_(FDR_0.01_FC_2)_regulated	APt1_count	APt2_count	APt3_count	NPt1_count	NPt2_count	NPt3_count	NPt1_NPt2_NPt3_vs_APt1_APt2_APt3_DESeq2_FDR	NPt1_NPt2_NPt3_vs_APt1_APt2_APt3_DESeq2_(FDR_0.05_FC_2)_regulated	NPt1_NPt2_NPt3_vs_APt1_APt2_APt3_DESeq2_(FDR_0.05_FC_1.5)_regulated	NPt1_NPt2_NPt3_vs_APt1_APt2_APt3_DESeq2_(FDR_0.05_FC_1)_regulated	NPt1_NPt2_NPt3_vs_APt1_APt2_APt3_DESeq2_Pvalue	NPt1_NPt2_NPt3_vs_APt1_APt2_APt3_DESeq2_(Pvalue_0.05_FC_2)_regulated	NPt1_NPt2_NPt3_vs_APt3_APt2_APt1_DESeq2_FDR	NPt1_NPt2_NPt3_vs_APt3_APt2_APt1_DESeq2_log2FC	NPt1_NPt2_NPt3_vs_APt3_APt2_APt1_DESeq2_(FDR_0.05_FC_2)_regulated	COG_class	COG_class_annotation	GO_annotation	KEGG_annotation	KEGG_pathway_annotation	KOG_class	KOG_class_annotation	Pfam_annotation	Swiss_Prot_annotation	eggNOG_class	eggNOG_class_annotation	NR_annotation	GO_second_level_annotation
PaF106G0400018019.01	PaF106G0400018019.01	9.16	10.16	10.48	0.11	0.15	0.08	5.67	up	809	837	1006	11	13	9	3.32e-149	up	up	up	3.76e-152	up	3.32e-149	5.66546	up	--		Molecular Function: protein serine/threonine kinase activity (GO:0004674);; Molecular Function: ATP binding (GO:0005524);; Cellular Component: plasma membrane (GO:0005886);; Biological Process: protein phosphorylation (GO:0006468);; Cellular Component: integral component of membrane (GO:0016021);;	K24104|1.8e-85|thj:104799061|K24104 GPN-loop GTPase | (RefSeq) LOW QUALITY PROTEIN: uncharacterized protein LOC104799061	--	--	--	Protein kinase domain	Cysteine-rich receptor-like protein kinase 26 OS=Arabidopsis thaliana OX=3702 GN=CRK26 PE=2 SV=1	T	Signal transduction mechanisms	putative receptor-like protein kinase At4g00960 [Prunus persica]	biological process: metabolic process (GO:0008152);; biological process: cellular process (GO:0009987);; molecular function: catalytic activity (GO:0003824);; molecular function: binding (GO:0005488);; cellular component: cell (GO:0005623);; cellular component: membrane (GO:0016020);; cellular component: cell part (GO:0044464);; cellular component: membrane part (GO:0044425)
PaF106G0300012916.01	PaF106G0300012916.01	0.21	0.57	0.34	1.8	1.09	1.28	-1.34	down	12	30	21	110	56	76	0.000119322	down	down	down	2.64e-05	down	0.000119322	-1.33536	down	[Q]	Secondary metabolites biosynthesis, transport and catabolism	Molecular Function: hydrolase activity (GO:0016787);;	K08726|9.8e-24|sbi:8071538|K08726 soluble epoxide hydrolase / lipid-phosphate phosphatase [EC:3.3.2.10 3.1.3.76] | (RefSeq) uncharacterized protein LOC8071538	Arachidonic acid metabolism (ko00590);; Peroxisome (ko04146)	[I]	Lipid transport and metabolism	alpha/beta hydrolase fold	--	I	Lipid transport and metabolism	unnamed protein product [Prunus armeniaca]	molecular function: catalytic activity (GO:0003824)
PaF106G0700027388.01	PaF106G0700027388.01	0.9	0.99	0.95	0.31	0.54	0.22	1.16	up	81	88	99	33	47	21	0.000360095	up	up	up	8.91e-05	up	0.000360095	1.15793	up	--	--	Molecular Function: DNA binding (GO:0003677);; Cellular Component: nucleus (GO:0005634);;	--	--	--	--	B3 DNA binding domain	B3 domain-containing transcription factor VRN1 OS=Arabidopsis thaliana OX=3702 GN=VRN1 PE=1 SV=1	--	--	B3 domain-containing protein Os03g0620500 isoform X1 [Prunus persica]	molecular function: binding (GO:0005488);; cellular component: cell (GO:0005623);; cellular component: organelle (GO:0043226);; cellular component: cell part (GO:0044464)
PaF106G0200010775.01	PaF106G0200010775.01	5.75	11.13	7.77	3.86	3.49	2.48	1.26	up	331	597	486	242	183	151	2.54e-08	up	up	up	2.86e-09	up	2.54e-08	1.26353	up	[Q]	Secondary metabolites biosynthesis, transport and catabolism	Molecular Function: metal ion binding (GO:0046872);; Molecular Function: dioxygenase activity (GO:0051213);;	K24028|4.5e-194|pavi:110749563|K24028 salicylic acid 3-hydroxylase [EC:1.14.11.-] | (RefSeq) protein DOWNY MILDEW RESISTANCE 6	--	[QR]	Secondary metabolites biosynthesis, transport and catabolism;; General function prediction only	2OG-Fe(II) oxygenase superfamily	Protein DOWNY MILDEW RESISTANCE 6 OS=Arabidopsis thaliana OX=3702 GN=DMR6 PE=1 SV=1	Q	Secondary metabolites biosynthesis, transport and catabolism	unnamed protein product [Prunus armeniaca]	molecular function: binding (GO:0005488);; biological process: metabolic process (GO:0008152);; biological process: single-organism process (GO:0044699);; molecular function: catalytic activity (GO:0003824)
PaF106G0100006242.01	PaF106G0100006242.01	0.59	1.29	0.76	0.22	0.33	0.31	1.2	up	47	96	66	20	25	27	0.000567994	up	up	up	0.00014705	up	0.000567994	1.20197	up	[V]	Defense mechanisms	Molecular Function: antiporter activity (GO:0015297);; Cellular Component: integral component of membrane (GO:0016021);; Molecular Function: xenobiotic transporter activity (GO:0042910);;	K03327|1.3e-283|pmum:103319408|K03327 multidrug resistance protein, MATE family | (RefSeq) protein DETOXIFICATION 48	--	[R]	General function prediction only	MatE	Protein DETOXIFICATION 48 OS=Arabidopsis thaliana OX=3702 GN=DTX48 PE=2 SV=1	V	Defense mechanisms	unnamed protein product [Prunus armeniaca]	biological process: localization (GO:0051179);; molecular function: transporter activity (GO:0005215);; cellular component: membrane (GO:0016020);; cellular component: membrane part (GO:0044425)
PaF106G0100006458.01	PaF106G0100006458.01	2.39	3.58	3.43	0.67	0.56	0.49	2.19	up	150	210	235	46	32	33	1.92e-18	up	up	up	8.07e-20	up	1.92e-18	2.18811	up	--		Molecular Function: transmembrane receptor protein serine/threonine kinase activity (GO:0004675);; Molecular Function: receptor binding (GO:0005102);; Molecular Function: ATP binding (GO:0005524);;	K13416|1.6e-189|pper:18792858|K13416 brassinosteroid insensitive 1-associated receptor kinase 1 [EC:2.7.10.1 2.7.11.1] | (RefSeq) BRASSINOSTEROID INSENSITIVE 1-associated receptor kinase 1	MAPK signaling pathway - plant (ko04016);; Plant hormone signal transduction (ko04075);; Plant-pathogen interaction (ko04626)	[T]	Signal transduction mechanisms	Protein kinase domain	BRASSINOSTEROID INSENSITIVE 1-associated receptor kinase 1 OS=Arabidopsis thaliana OX=3702 GN=BAK1 PE=1 SV=2	T	Signal transduction mechanisms	BRASSINOSTEROID INSENSITIVE 1-associated receptor kinase 1-like [Prunus dulcis]	biological process: metabolic process (GO:0008152);; biological process: cellular process (GO:0009987);; biological process: signaling (GO:0023052);; biological process: single-organism process (GO:0044699);; biological process: response to stimulus (GO:0050896);; biological process: biological regulation (GO:0065007);; molecular function: catalytic activity (GO:0003824);; molecular function: sig…
PaF106G0800031238.01	PaF106G0800031238.01	1.11	2.35	2.48	6.23	5.35	4.85	-1.24	down	59	116	136	355	254	262	5.56e-07	down	down	down	7.84e-08	down	5.56e-07	-1.2385	down	[Q]	Secondary metabolites biosynthesis, transport and catabolism	Molecular Function: metal ion binding (GO:0046872);; Molecular Function: dioxygenase activity (GO:0051213);;	K24028|1.7e-55|aip:107624075|K24028 salicylic acid 3-hydroxylase [EC:1.14.11.-] | (RefSeq) protein DOWNY MILDEW RESISTANCE 6	--	[QR]	Secondary metabolites biosynthesis, transport and catabolism;; General function prediction only	non-haem dioxygenase in morphine synthesis N-terminal	Probable 2-oxoglutarate-dependent dioxygenase At5g05600 OS=Arabidopsis thaliana OX=3702 GN=At5g05600 PE=2 SV=1	Q	Secondary metabolites biosynthesis, transport and catabolism	unnamed protein product [Prunus armeniaca]	molecular function: binding (GO:0005488);; biological process: metabolic process (GO:0008152);; biological process: single-organism process (GO:0044699);; molecular function: catalytic activity (GO:0003824)
PaF106G0200008252.01	PaF106G0200008252.01	0.16	0.35	0.29	1.08	1.31	1.11	-1.73	down	26	50	47	175	178	175	6.38e-11	down	down	down	5.12e-12	down	6.38e-11	-1.73198	down	--	--	Biological Process: defense response (GO:0006952);; Molecular Function: ADP binding (GO:0043531);;	K15078|1.9e-69|tcc:18614561|K15078 structure-specific endonuclease subunit SLX1 [EC:3.6.1.-] | (RefSeq) putative disease resistance protein RGA3	--	[T]	Signal transduction mechanisms	Leucine rich repeat	Putative disease resistance protein RGA3 OS=Solanum bulbocastanum OX=147425 GN=RGA3 PE=2 SV=2	T	Signal transduction mechanisms	unnamed protein product [Prunus armeniaca]	biological process: response to stimulus (GO:0050896);; molecular function: binding (GO:0005488)
PaF106G0700027901.01	PaF106G0700027901.01	0.28	0.71	0.69	7.13	7.12	5.38	-3.04	down	17	40	46	466	389	341	6.08e-37	down	down	down	9.49e-39	down	6.08e-37	-3.03521	down	[Q]	Secondary metabolites biosynthesis, transport and catabolism	Molecular Function: oxidoreductase activity (GO:0016491);; Molecular Function: metal ion binding (GO:0046872);;	K13229|1.3e-80|ats:109766943|K13229 2,4-dihydroxy-1,4-benzoxazin-3-one-glucoside dioxygenase [EC:1.14.11.59] | (RefSeq) LOC109766943; DIBOA-glucoside dioxygenase BX6-like	Benzoxazinoid biosynthesis (ko00402)	[QR]	Secondary metabolites biosynthesis, transport and catabolism;; General function prediction only	2OG-Fe(II) oxygenase superfamily	1-aminocyclopropane-1-carboxylate oxidase homolog 4 OS=Arabidopsis thaliana OX=3702 GN=At1g03400 PE=2 SV=1	Q	Secondary metabolites biosynthesis, transport and catabolism	PREDICTED: 1-aminocyclopropane-1-carboxylate oxidase homolog 4-like [Prunus mume]	molecular function: catalytic activity (GO:0003824);; molecular function: binding (GO:0005488)
PaF106G0500021088.01	PaF106G0500021088.01	3.03	4.03	4.81	11.3	9.7	9.62	-1.24	down	218	270	375	883	634	729	1.34e-14	down	down	down	7.56e-16	down	1.34e-14	-1.23593	down	[QV]	Secondary metabolites biosynthesis, transport and catabolism;; Defense mechanisms	Molecular Function: monooxygenase activity (GO:0004497);; Molecular Function: iron ion binding (GO:0005506);; Molecular Function: oxidoreductase activity, acting on paired donors, with incorporation or reduction of molecular oxygen (GO:0016705);; Molecular Function: heme binding (GO:0020037);;	K20562|5.4e-167|thj:104815260|K20562 biphenyl-4-hydroxylase | (RefSeq) cytochrome P450 CYP736A12-like	--	[Q]	Secondary metabolites biosynthesis, transport and catabolism	Cytochrome P450	Cytochrome P450 CYP736A12 OS=Panax ginseng OX=4054 PE=2 SV=1	Q	Secondary metabolites biosynthesis, transport and catabolism	PREDICTED: cytochrome P450 CYP736A12-like [Prunus mume]	biological process: metabolic process (GO:0008152);; biological process: single-organism process (GO:0044699);; molecular function: catalytic activity (GO:0003824);; molecular function: binding (GO:0005488)
PaF106G0700027385.01	PaF106G0700027385.01	3.5	4.09	4.16	1.54	2.3	1.76	1.03	up	154	168	199	74	92	82	1.22e-05	up	up	up	2.21e-06	up	1.22e-05	1.02867	up	--	--	Molecular Function: DNA binding (GO:0003677);; Cellular Component: nucleus (GO:0005634);;	--	--	--	--	B3 DNA binding domain	Putative B3 domain-containing protein Os03g0621600 OS=Oryza sativa subsp. japonica OX=39947 GN=Os03g0621600 PE=3 SV=1	K	Transcription	unnamed protein product [Prunus armeniaca]	molecular function: binding (GO:0005488);; cellular component: cell (GO:0005623);; cellular component: organelle (GO:0043226);; cellular component: cell part (GO:0044464)
PaF106G0700028608.01	PaF106G0700028608.01	1.04	1.2	1.39	0.32	0.06	0.17	1.92	up	67	72	97	22	4	12	3.89e-08	up	up	up	4.51e-09	up	3.89e-08	1.91953	up	--	--	Molecular Function: DNA binding (GO:0003677);; Cellular Component: nucleus (GO:0005634);;	--	--	--	--	B3 DNA binding domain	B3 domain-containing transcription factor VRN1 OS=Arabidopsis thaliana OX=3702 GN=VRN1 PE=1 SV=1	K	Transcription	PREDICTED: B3 domain-containing transcription factor VRN1-like isoform X1 [Prunus mume]	molecular function: binding (GO:0005488);; cellular component: cell (GO:0005623);; cellular component: organelle (GO:0043226);; cellular component: cell part (GO:0044464)
PaF106G0700027029.01	PaF106G0700027029.01	0.17	0.18	0.19	1.3	1.33	2.11	-2.17	down	10	9	11	75	65	118	1.17e-10	down	down	down	9.71e-12	down	1.17e-10	-2.1689	down	--	--	Biological Process: double-strand break repair via homologous recombination (GO:0000724);; Biological Process: recombinational repair (GO:0000725);; Molecular Function: molecular_function (GO:0003674);; Molecular Function: nucleic acid binding (GO:0003676);; Molecular Function: DNA binding (GO:0003677);; Molecular Function: DNA helicase activity (GO:0003678);; Molecular Function: catalytic activi…	--	--	--	--	Protein of unknown function (DUF295)	F-box protein At4g35733 OS=Arabidopsis thaliana OX=3702 GN=At4g35733 PE=2 SV=1	S	Function unknown	unnamed protein product [Prunus armeniaca]	biological process: metabolic process (GO:0008152);; biological process: cellular process (GO:0009987);; biological process: response to stimulus (GO:0050896);; molecular function: binding (GO:0005488);; molecular function: catalytic activity (GO:0003824);; biological process: cellular component organization or biogenesis (GO:0071840);; cellular component: cell (GO:0005623);; cellular component: …
PaF106G0100006700.01	PaF106G0100006700.01	120.1	111.85	140.62	68.26	59.77	64.96	1.01	up	8847	7682	11264	5447	3988	5019	2.22e-27	up	up	up	5.37e-29	up	2.22e-27	1.01079	up	[QV]	Secondary metabolites biosynthesis, transport and catabolism;; Defense mechanisms	Molecular Function: iron ion binding (GO:0005506);; Cellular Component: membrane (GO:0016020);; Molecular Function: oxidoreductase activity, acting on paired donors, with incorporation or reduction of molecular oxygen, NAD(P)H as one donor, and incorporation of one atom of oxygen (GO:0016709);; Molecular Function: heme binding (GO:0020037);;	K09754|4.7e-296|pmum:103319006|K09754 5-O-(4-coumaroyl)-D-quinate 3'-monooxygenase [EC:1.14.14.96] | (RefSeq) cytochrome P450 98A2-like	Phenylpropanoid biosynthesis (ko00940);; Flavonoid biosynthesis (ko00941);; Stilbenoid, diarylheptanoid and gingerol biosynthesis (ko00945)	[Q]	Secondary metabolites biosynthesis, transport and catabolism	Cytochrome P450	Cytochrome P450 98A2 OS=Glycine max OX=3847 GN=CYP98A2 PE=2 SV=1	Q	Secondary metabolites biosynthesis, transport and catabolism	unnamed protein product [Prunus armeniaca]	molecular function: binding (GO:0005488);; cellular component: membrane (GO:0016020);; biological process: metabolic process (GO:0008152);; biological process: single-organism process (GO:0044699);; molecular function: catalytic activity (GO:0003824)
PaF106G0800032778.01	PaF106G0800032778.01	4.07	4.14	3.62	1.2	1.36	0.94	1.73	up	537	509	519	173	164	132	7.95e-25	up	up	up	2.29e-26	up	7.95e-25	1.73024	up	--	--	Biological Process: defense response (GO:0006952);; Molecular Function: ADP binding (GO:0043531);;	K13457|0.0e+00|pper:18768817|K13457 disease resistance protein RPM1 | (RefSeq) disease resistance protein RPM1	Plant-pathogen interaction (ko04626)	[T]	Signal transduction mechanisms	NB-ARC domain	Disease resistance protein RPM1 OS=Arabidopsis thaliana OX=3702 GN=RPM1 PE=1 SV=1	T	Signal transduction mechanisms	disease resistance protein RPM1 [Prunus persica]	biological process: response to stimulus (GO:0050896);; molecular function: binding (GO:0005488)
PaF106G0800030354.01	PaF106G0800030354.01	7.93	7.63	8.12	17.12	17.74	18.88	-1.08	down	447	401	498	1051	910	1123	9.75e-21	down	down	down	3.58e-22	down	9.75e-21	-1.08276	down	--	--	Molecular Function: molecular_function (GO:0003674);; Molecular Function: nucleic acid binding (GO:0003676);; Molecular Function: RNA binding (GO:0003723);; Molecular Function: catalytic activity (GO:0003824);; Molecular Function: nuclease activity (GO:0004518);; Molecular Function: endonuclease activity (GO:0004519);; Molecular Function: binding (GO:0005488);; Cellular Component: cellular_compon…	--	--	[R]	General function prediction only	PPR repeat family	Pentatricopeptide repeat-containing protein At4g38150 OS=Arabidopsis thaliana OX=3702 GN=At4g38150 PE=2 SV=1	S	Function unknown	PREDICTED: pentatricopeptide repeat-containing protein At4g38150 [Prunus mume]	molecular function: binding (GO:0005488);; molecular function: catalytic activity (GO:0003824);; biological process: metabolic process (GO:0008152);; biological process: cellular process (GO:0009987);; cellular component: cell (GO:0005623);; cellular component: cell part (GO:0044464);; cellular component: organelle (GO:0043226)
PaF106G0800031239.01	PaF106G0800031239.01	2.08	1.61	1.83	0.43	0.86	0.66	1.3	up	125	90	119	28	47	42	1.26e-05	up	up	up	2.29e-06	up	1.26e-05	1.29972	up	[Q]	Secondary metabolites biosynthesis, transport and catabolism	Molecular Function: metal ion binding (GO:0046872);; Molecular Function: dioxygenase activity (GO:0051213);;	K24028|6.2e-53|pda:103712793|K24028 salicylic acid 3-hydroxylase [EC:1.14.11.-] | (RefSeq) flavanone 3-dioxygenase 2-like	--	[QR]	Secondary metabolites biosynthesis, transport and catabolism;; General function prediction only	non-haem dioxygenase in morphine synthesis N-terminal	Probable 2-oxoglutarate-dependent dioxygenase At5g05600 OS=Arabidopsis thaliana OX=3702 GN=At5g05600 PE=2 SV=1	Q	Secondary metabolites biosynthesis, transport and catabolism	unnamed protein product [Prunus armeniaca]	molecular function: binding (GO:0005488);; biological process: metabolic process (GO:0008152);; biological process: single-organism process (GO:0044699);; molecular function: catalytic activity (GO:0003824)
PaF106G0800031807.01	PaF106G0800031807.01	1.25	0.96	1.5	4.73	4.16	4.21	-1.56	down	61	43	79	248	182	214	1.3e-11	down	down	down	9.64e-13	down	1.3e-11	-1.55719	down	[Q]	Secondary metabolites biosynthesis, transport and catabolism	Molecular Function: oxidoreductase activity (GO:0016491);; Molecular Function: metal ion binding (GO:0046872);;	K24028|4.5e-91|lja:Lj0g3v0213339.1|K24028 salicylic acid 3-hydroxylase [EC:1.14.11.-] | (RefSeq) Lj0g3v0213339.1; -	--	[QR]	Secondary metabolites biosynthesis, transport and catabolism;; General function prediction only	non-haem dioxygenase in morphine synthesis N-terminal	2-oxoglutarate-dependent dioxygenase 19 OS=Oryza sativa subsp. japonica OX=39947 GN=2ODD19 PE=1 SV=1	Q	Secondary metabolites biosynthesis, transport and catabolism	hypothetical protein Pyn_24989 [Prunus yedoensis var. nudiflora]	molecular function: catalytic activity (GO:0003824);; molecular function: binding (GO:0005488)
PaF106G0500019181.01	PaF106G0500019181.01	21.56	23.99	18.96	4.84	6.35	5.82	1.92	up	1495	1552	1430	366	401	427	6.39e-44	up	up	up	7.73e-46	up	6.39e-44	1.92418	up	--	--	Molecular Function: transcription corepressor activity (GO:0003714);; Biological Process: negative regulation of transcription, DNA-templated (GO:0045892);; Molecular Function: metal ion binding (GO:0046872);;	--	--	--	--	--	Increased DNA methylation 1 OS=Arabidopsis thaliana OX=3702 GN=IDM1 PE=1 SV=1	S	Function unknown	hypothetical protein PRUPE_5G059900 [Prunus persica]	biological process: biological regulation (GO:0065007);; molecular function: transcription factor activity, protein binding (GO:0000988);; molecular function: binding (GO:0005488)
PaF106G0800029287.01	PaF106G0800029287.01	4.94	5.28	4.26	10.85	11.52	10.37	-1.07	down	702	699	658	1676	1488	1555	4.25e-20	down	down	down	1.62e-21	down	4.25e-20	-1.07365	down	--	--	Molecular Function: molecular_function (GO:0003674);; Molecular Function: nucleic acid binding (GO:0003676);; Molecular Function: RNA binding (GO:0003723);; Molecular Function: catalytic activity (GO:0003824);; Molecular Function: nuclease activity (GO:0004518);; Molecular Function: endonuclease activity (GO:0004519);; Molecular Function: binding (GO:0005488);; Cellular Component: cellular_compon…	--	--	[R]	General function prediction only	PPR repeat family	Pentatricopeptide repeat-containing protein At5g14820, mitochondrial OS=Arabidopsis thaliana OX=3702 GN=At5g14820 PE=2 SV=1	L	Replication, recombination and repair	unnamed protein product [Prunus armeniaca]	molecular function: binding (GO:0005488);; molecular function: catalytic activity (GO:0003824);; biological process: metabolic process (GO:0008152);; biological process: cellular process (GO:0009987);; cellular component: cell (GO:0005623);; cellular component: cell part (GO:0044464);; cellular component: organelle (GO:0043226)
PaF106G0100001486.01	PaF106G0100001486.01	2.52	3.87	4.09	1.39	1.1	1.15	1.41	up	151	224	270	94	61	73	5.11e-09	up	up	up	5.23e-10	up	5.11e-09	1.41123	up	--	--	Molecular Function: protein serine/threonine phosphatase activity (GO:0004722);;	K17506|1.1e-26|ppp:112274707|K17506 protein phosphatase 1L [EC:3.1.3.16] | (RefSeq) probable protein phosphatase 2C 59 isoform X1	--	[T]	Signal transduction mechanisms	Protein phosphatase 2C	Probable protein phosphatase 2C 34 OS=Arabidopsis thaliana OX=3702 GN=At3g05640 PE=1 SV=1	T	Signal transduction mechanisms	unnamed protein product [Prunus armeniaca]	biological process: metabolic process (GO:0008152);; biological process: cellular process (GO:0009987);; molecular function: catalytic activity (GO:0003824)
PaF106G0800029503.01	PaF106G0800029503.01	4.52	6.06	7.12	1.48	1	1.01	2.15	up	265	328	454	96	56	63	7.63e-23	up	up	up	2.49e-24	up	7.63e-23	2.14521	up	[P]	Inorganic ion transport and metabolism	Molecular Function: oxidoreductase activity (GO:0016491);; Molecular Function: flavin adenine dinucleotide binding (GO:0050660);; Molecular Function: NADP binding (GO:0050661);;	K11816|2.1e-186|pmum:103333856|K11816 indole-3-pyruvate monooxygenase [EC:1.14.13.168] | (RefSeq) probable indole-3-pyruvate monooxygenase YUCCA10	Tryptophan metabolism (ko00380)	[Q]	Secondary metabolites biosynthesis, transport and catabolism	Pyridine nucleotide-disulphide oxidoreductase	Probable indole-3-pyruvate monooxygenase YUCCA10 OS=Arabidopsis thaliana OX=3702 GN=YUC10 PE=2 SV=1	Q	Secondary metabolites biosynthesis, transport and catabolism	hypothetical protein PRUPE_8G252500 [Prunus persica]	molecular function: catalytic activity (GO:0003824);; molecular function: binding (GO:0005488)
PaF106G0800031809.01	PaF106G0800031809.01	1.08	0.98	1.76	7.86	7.13	7.62	-2.25	down	52	45	93	411	312	387	2.61e-26	down	down	down	6.88e-28	down	2.61e-26	-2.25143	down	[Q]	Secondary metabolites biosynthesis, transport and catabolism	Molecular Function: oxidoreductase activity (GO:0016491);; Molecular Function: metal ion binding (GO:0046872);;	K24028|1.3e-90|lja:Lj0g3v0213339.1|K24028 salicylic acid 3-hydroxylase [EC:1.14.11.-] | (RefSeq) Lj0g3v0213339.1; -	--	[QR]	Secondary metabolites biosynthesis, transport and catabolism;; General function prediction only	non-haem dioxygenase in morphine synthesis N-terminal	2-oxoglutarate-dependent dioxygenase 19 OS=Oryza sativa subsp. japonica OX=39947 GN=2ODD19 PE=1 SV=1	Q	Secondary metabolites biosynthesis, transport and catabolism	PREDICTED: protein DMR6-LIKE OXYGENASE 2-like [Prunus mume]	molecular function: catalytic activity (GO:0003824);; molecular function: binding (GO:0005488)
PaF106G0700027390.01	PaF106G0700027390.01	0.35	0.08	0.44	8	8.09	5.74	-2.51	down	36	8	49	845	712	573	1.68e-11	down	down	down	1.26e-12	down	1.68e-11	-2.51283	down	--	--	Molecular Function: DNA binding (GO:0003677);; Cellular Component: nucleus (GO:0005634);;	--	--	--	--	B3 DNA binding domain	Putative B3 domain-containing protein Os03g0621600 OS=Oryza sativa subsp. japonica OX=39947 GN=Os03g0621600 PE=3 SV=1	K	Transcription	B3 domain-containing protein Os03g0619600-like [Prunus avium]	molecular function: binding (GO:0005488);; cellular component: cell (GO:0005623);; cellular component: organelle (GO:0043226);; cellular component: cell part (GO:0044464)
PaF106G0200007544.01	PaF106G0200007544.01	36.54	31.73	33.87	0.18	0.21	0.33	6.72	up	3539	2866	3566	19	19	34	0	up	up	up	0	up	0	6.72239	up	--	--	Biological Process: signal transduction (GO:0007165);; Molecular Function: ADP binding (GO:0043531);;	K13459|7.4e-06|egu:105052098|K13459 disease resistance protein RPS2 | (RefSeq) probable disease resistance protein At1g12280	Plant-pathogen interaction (ko04626)	--	--	Leucine Rich repeats (2 copies)	Protein SUPPRESSOR OF npr1-1, CONSTITUTIVE 1 OS=Arabidopsis thaliana OX=3702 GN=SNC1 PE=1 SV=5	T	Signal transduction mechanisms	disease resistance protein RPS4-like [Prunus avium]	biological process: cellular process (GO:0009987);; biological process: biological regulation (GO:0065007);; molecular function: binding (GO:0005488)
PaF106G0400016052.01	PaF106G0400016052.01	1.91	2.71	2.09	0.95	0.99	0.82	1.18	up	114	151	136	62	54	52	5.68e-06	up	up	up	9.62e-07	up	5.68e-06	1.1777	up	[V]	Defense mechanisms	Molecular Function: antiporter activity (GO:0015297);; Cellular Component: integral component of membrane (GO:0016021);; Molecular Function: xenobiotic transporter activity (GO:0042910);;	K03327|1.6e-231|pavi:110745431|K03327 multidrug resistance protein, MATE family | (RefSeq) protein DETOXIFICATION 19-like	--	[R]	General function prediction only	MatE	Protein DETOXIFICATION 19 OS=Arabidopsis thaliana OX=3702 GN=DTX19 PE=2 SV=1	V	Defense mechanisms	unnamed protein product [Prunus armeniaca]	biological process: localization (GO:0051179);; molecular function: transporter activity (GO:0005215);; cellular component: membrane (GO:0016020);; cellular component: membrane part (GO:0044425)
PaF106G0400015254.01	PaF106G0400015254.01	4.11	3.51	4.66	16.05	16.51	15.95	-1.85	down	260	207	320	1103	948	1062	2.33e-47	down	down	down	2.51e-49	down	2.33e-47	-1.84597	down	[Q]	Secondary metabolites biosynthesis, transport and catabolism	Molecular Function: metal ion binding (GO:0046872);; Molecular Function: dioxygenase activity (GO:0051213);;	K14975|1.3e-58|psom:113311621|K14975 codeine 3-O-demethylase [EC:1.14.11.32] | (RefSeq) codeine O-demethylase	Isoquinoline alkaloid biosynthesis (ko00950)	[QR]	Secondary metabolites biosynthesis, transport and catabolism;; General function prediction only	non-haem dioxygenase in morphine synthesis N-terminal	2-oxoglutarate-dependent dioxygenase 11 OS=Oryza sativa subsp. japonica OX=39947 GN=2ODD11 PE=1 SV=1	Q	Secondary metabolites biosynthesis, transport and catabolism	unnamed protein product [Prunus armeniaca]	molecular function: binding (GO:0005488);; biological process: metabolic process (GO:0008152);; biological process: single-organism process (GO:0044699);; molecular function: catalytic activity (GO:0003824)
PaF106G0700028384.01	PaF106G0700028384.01	0.83	0.73	1.36	12.68	11.49	11.78	-3.29	down	50	41	89	825	625	743	8.95e-71	down	down	down	4.75e-73	down	8.95e-71	-3.28736	down	--	--	Molecular Function: DNA binding (GO:0003677);; Cellular Component: nucleus (GO:0005634);;	--	--	--	--	B3 DNA binding domain	B3 domain-containing protein REM16 OS=Arabidopsis thaliana OX=3702 GN=REM16 PE=2 SV=1	K	Transcription	unnamed protein product [Prunus armeniaca]	molecular function: binding (GO:0005488);; cellular component: cell (GO:0005623);; cellular component: organelle (GO:0043226);; cellular component: cell part (GO:0044464)
PaF106G0400016870.01	PaF106G0400016870.01	3.56	3.02	2.95	0.98	1.38	1.26	1.39	up	593	469	534	178	210	222	2.69e-15	up	up	up	1.43e-16	up	2.69e-15	1.38551	up	[T]	Signal transduction mechanisms	Molecular Function: protein kinase activity (GO:0004672);; Molecular Function: ATP binding (GO:0005524);; Cellular Component: integral component of membrane (GO:0016021);;	K00924|3.4e-66|csat:104702328|K00924 kinase [EC:2.7.1.-] | (RefSeq) receptor protein kinase CLAVATA1-like	--	--	--	Protein kinase domain	LRR receptor-like serine/threonine-protein kinase GSO1 OS=Arabidopsis thaliana OX=3702 GN=GSO1 PE=1 SV=1	T	Signal transduction mechanisms	LRR receptor-like serine/threonine-protein kinase GSO1 [Prunus yedoensis var. nudiflora]	biological process: metabolic process (GO:0008152);; biological process: cellular process (GO:0009987);; molecular function: catalytic activity (GO:0003824);; molecular function: binding (GO:0005488);; cellular component: membrane (GO:0016020);; cellular component: membrane part (GO:0044425)
PaF106G0800031799.01	PaF106G0800031799.01	15.8	12.07	11.89	27.02	34.42	32.14	-1.11	down	993	702	813	1834	1973	2134	1.9e-14	down	down	down	1.08e-15	down	1.9e-14	-1.11479	down	[Q]	Secondary metabolites biosynthesis, transport and catabolism	Molecular Function: metal ion binding (GO:0046872);; Molecular Function: dioxygenase activity (GO:0051213);;	K24028|2.1e-96|gmx:100776216|K24028 salicylic acid 3-hydroxylase [EC:1.14.11.-] | (RefSeq) protein DMR6-LIKE OXYGENASE 1	--	[QR]	Secondary metabolites biosynthesis, transport and catabolism;; General function prediction only	2OG-Fe(II) oxygenase superfamily	2-oxoglutarate-dependent dioxygenase 19 OS=Oryza sativa subsp. japonica OX=39947 GN=2ODD19 PE=1 SV=1	Q	Secondary metabolites biosynthesis, transport and catabolism	PREDICTED: protein DMR6-LIKE OXYGENASE 2-like [Prunus mume]	molecular function: binding (GO:0005488);; biological process: metabolic process (GO:0008152);; biological process: single-organism process (GO:0044699);; molecular function: catalytic activity (GO:0003824)
PaF106G0100001283.01	PaF106G0100001283.01	1.27	1.32	1.65	2.73	3.92	2.53	-1	down	397	378	553	935	1112	833	1.89e-09	down	down	down	1.82e-10	down	1.89e-09	-1.00271	down	--	--	Molecular Function: microtubule motor activity (GO:0003777);; Molecular Function: ATP binding (GO:0005524);; Biological Process: microtubule-based movement (GO:0007018);; Molecular Function: microtubule binding (GO:0008017);;	K10400|0.0e+00|pmum:103323266|K10400 kinesin family member 15 | (RefSeq) LOW QUALITY PROTEIN: phragmoplast orienting kinesin-1	--	--	--	Kinesin motor domain	Kinesin-like protein KIN-12C OS=Arabidopsis thaliana OX=3702 GN=KIN12C PE=1 SV=1	Z	Cytoskeleton	unnamed protein product [Prunus armeniaca]	molecular function: catalytic activity (GO:0003824);; molecular function: binding (GO:0005488);; biological process: cellular process (GO:0009987);; biological process: single-organism process (GO:0044699)
PaF106G0200009721.01	PaF106G0200009721.01	8.17	11.14	10.93	60.97	77.16	73.12	-2.65	down	319	406	464	2590	2739	3011	9.94e-94	down	down	down	3.38e-96	down	9.94e-94	-2.64572	down	--	--	--	--	--	--	--	Protein of unknown function (DUF674)	--	L	Replication, recombination and repair	uncharacterized protein LOC18785824 isoform X1 [Prunus persica]	--
PaF106G0800029787.01	PaF106G0800029787.01	19.22	15.96	15.31	34.97	38.87	38.27	-1.05	down	1556	1204	1347	3080	2861	3268	2.4e-19	down	down	down	9.51e-21	down	2.4e-19	-1.04785	down	--	--	Molecular Function: iron ion binding (GO:0005506);; Molecular Function: oxidoreductase activity, acting on paired donors, with incorporation or reduction of molecular oxygen (GO:0016705);; Molecular Function: heme binding (GO:0020037);;	K20769|6.8e-108|pmum:103334522|K20769 fatty acid omega-hydroxylase [EC:1.14.-.-] | (RefSeq) cytochrome P450 94A1-like	Cutin, suberine and wax biosynthesis (ko00073)	[QI]	Secondary metabolites biosynthesis, transport and catabolism;; Lipid transport and metabolism	Cytochrome P450	Cytochrome P450 94A2 OS=Vicia sativa OX=3908 GN=CYP94A2 PE=2 SV=1	--	--	unnamed protein product [Prunus armeniaca]	molecular function: binding (GO:0005488);; biological process: metabolic process (GO:0008152);; biological process: single-organism process (GO:0044699);; molecular function: catalytic activity (GO:0003824)
PaF106G0300013739.01	PaF106G0300013739.01	3.08	3.44	4.41	1.85	1.61	1.6	1.06	up	152	158	237	100	73	84	4.14e-06	up	up	up	6.85e-07	up	4.14e-06	1.05664	up	[Q]	Secondary metabolites biosynthesis, transport and catabolism	Molecular Function: oxidoreductase activity (GO:0016491);; Molecular Function: metal ion binding (GO:0046872);;	K04124|1.7e-218|pavi:110760088|K04124 gibberellin 3beta-dioxygenase [EC:1.14.11.15] | (RefSeq) gibberellin 3-beta-dioxygenase 1	Diterpenoid biosynthesis (ko00904)	[QR]	Secondary metabolites biosynthesis, transport and catabolism;; General function prediction only	2OG-Fe(II) oxygenase superfamily	Gibberellin 3-beta-dioxygenase 1 OS=Pisum sativum OX=3888 GN=LE PE=1 SV=1	Q	Secondary metabolites biosynthesis, transport and catabolism	unnamed protein product [Prunus armeniaca]	molecular function: catalytic activity (GO:0003824);; molecular function: binding (GO:0005488)
PaF106G0600023944.01	PaF106G0600023944.01	0.64	0.66	0.91	0.03	0	0.05	3.04	up	82	80	126	5	0	7	6.94e-19	up	up	up	2.82e-20	up	6.94e-19	3.04478	up	[R]	General function prediction only	Biological Process: defense response (GO:0006952);; Molecular Function: ADP binding (GO:0043531);;	K13457|0.0e+00|pmum:103334422|K13457 disease resistance protein RPM1 | (RefSeq) disease resistance protein RPM1-like	Plant-pathogen interaction (ko04626)	[T]	Signal transduction mechanisms	NB-ARC domain	Disease resistance protein RPM1 OS=Arabidopsis thaliana OX=3702 GN=RPM1 PE=1 SV=1	T	Signal transduction mechanisms	PREDICTED: disease resistance protein RPM1-like [Prunus mume]	biological process: response to stimulus (GO:0050896);; molecular function: binding (GO:0005488)
PaF106G0800032790.01	PaF106G0800032790.01	3.87	4.23	3.29	0.49	0.69	0.61	2.55	up	512	522	473	70	84	86	2.9e-41	up	up	up	3.9e-43	up	2.9e-41	2.54555	up	--	--	Biological Process: defense response (GO:0006952);; Molecular Function: ADP binding (GO:0043531);;	K13457|0.0e+00|pper:18767028|K13457 disease resistance protein RPM1 | (RefSeq) disease resistance protein RPM1	Plant-pathogen interaction (ko04626)	[T]	Signal transduction mechanisms	NB-ARC domain	Disease resistance protein RPM1 OS=Arabidopsis thaliana OX=3702 GN=RPM1 PE=1 SV=1	T	Signal transduction mechanisms	putative NBS-LRR type disease resistance protein [Prunus persica]	biological process: response to stimulus (GO:0050896);; molecular function: binding (GO:0005488)
PaF106G0100005795.01	PaF106G0100005795.01	6.39	4.9	5.67	17.63	13.92	18.24	-1.41	down	341	244	329	1024	676	1027	4.11e-19	down	down	down	1.66e-20	down	4.11e-19	-1.41167	down	[Q]	Secondary metabolites biosynthesis, transport and catabolism	Molecular Function: metal ion binding (GO:0046872);; Molecular Function: dioxygenase activity (GO:0051213);;	K05278|5.4e-192|pmum:103332906|K05278 flavonol synthase [EC:1.14.20.6] | (RefSeq) flavonol synthase/flavanone 3-hydroxylase-like	Flavonoid biosynthesis (ko00941)	[QR]	Secondary metabolites biosynthesis, transport and catabolism;; General function prediction only	2OG-Fe(II) oxygenase superfamily	Flavonol synthase/flavanone 3-hydroxylase OS=Citrus unshiu OX=55188 GN=FLS PE=1 SV=1	Q	Secondary metabolites biosynthesis, transport and catabolism	unnamed protein product [Prunus armeniaca]	molecular function: binding (GO:0005488);; biological process: metabolic process (GO:0008152);; biological process: single-organism process (GO:0044699);; molecular function: catalytic activity (GO:0003824)
PaF106G0400018193.01	PaF106G0400018193.01	0.78	1	0.82	4.38	3.54	3.05	-1.78	down	47	57	54	288	194	194	3.32e-14	down	down	down	1.95e-15	down	3.32e-14	-1.77853	down	[Q]	Secondary metabolites biosynthesis, transport and catabolism	Molecular Function: oxidoreductase activity (GO:0016491);; Molecular Function: metal ion binding (GO:0046872);;	K04125|3.3e-161|pmum:103324491|K04125 gibberellin 2beta-dioxygenase [EC:1.14.11.13] | (RefSeq) gibberellin 2-beta-dioxygenase 8 isoform X1	Diterpenoid biosynthesis (ko00904)	[QR]	Secondary metabolites biosynthesis, transport and catabolism;; General function prediction only	2OG-Fe(II) oxygenase superfamily	Gibberellin 2-beta-dioxygenase 8 OS=Arabidopsis thaliana OX=3702 GN=GA2OX8 PE=1 SV=2	Q	Secondary metabolites biosynthesis, transport and catabolism	unnamed protein product [Prunus armeniaca]	molecular function: catalytic activity (GO:0003824);; molecular function: binding (GO:0005488)
PaF106G0100001314.01	PaF106G0100001314.01	3.07	4.07	4.25	1.46	1.53	1.15	1.39	up	182	225	273	95	83	72	2.43e-10	up	up	up	2.09e-11	up	2.43e-10	1.38639	up	[Q]	Secondary metabolites biosynthesis, transport and catabolism	Molecular Function: oxidoreductase activity (GO:0016491);; Molecular Function: metal ion binding (GO:0046872);;	K04125|6.5e-193|pmum:103323224|K04125 gibberellin 2beta-dioxygenase [EC:1.14.11.13] | (RefSeq) gibberellin 2-beta-dioxygenase 2-like	Diterpenoid biosynthesis (ko00904)	[QR]	Secondary metabolites biosynthesis, transport and catabolism;; General function prediction only	2OG-Fe(II) oxygenase superfamily	Gibberellin 2-beta-dioxygenase 2 OS=Pisum sativum OX=3888 GN=GA2OX2 PE=2 SV=1	Q	Secondary metabolites biosynthesis, transport and catabolism	unnamed protein product [Prunus armeniaca]	molecular function: catalytic activity (GO:0003824);; molecular function: binding (GO:0005488)
PaF106G0100000452.01	PaF106G0100000452.01	1.61	1.53	2.68	7.11	6.96	7.2	-1.64	down	76	69	142	374	304	366	2.54e-14	down	down	down	1.47e-15	down	2.54e-14	-1.63701	down	[Q]	Secondary metabolites biosynthesis, transport and catabolism	Molecular Function: metal ion binding (GO:0046872);; Molecular Function: dioxygenase activity (GO:0051213);;	K13229|1.1e-81|ats:109766943|K13229 2,4-dihydroxy-1,4-benzoxazin-3-one-glucoside dioxygenase [EC:1.14.11.59] | (RefSeq) LOC109766943; DIBOA-glucoside dioxygenase BX6-like	Benzoxazinoid biosynthesis (ko00402)	[QR]	Secondary metabolites biosynthesis, transport and catabolism;; General function prediction only	2OG-Fe(II) oxygenase superfamily	1-aminocyclopropane-1-carboxylate oxidase homolog 1 OS=Arabidopsis thaliana OX=3702 GN=At1g06620 PE=2 SV=1	Q	Secondary metabolites biosynthesis, transport and catabolism	PREDICTED: 1-aminocyclopropane-1-carboxylate oxidase homolog 1-like [Prunus mume]	molecular function: binding (GO:0005488);; biological process: metabolic process (GO:0008152);; biological process: single-organism process (GO:0044699);; molecular function: catalytic activity (GO:0003824)
PaF106G0600023946.01	PaF106G0600023946.01	0.82	1.06	0.82	0.26	0.3	0.27	1.44	up	91	110	99	33	31	33	5.54e-07	up	up	up	7.81e-08	up	5.54e-07	1.43677	up	[R]	General function prediction only	Biological Process: defense response (GO:0006952);; Molecular Function: ADP binding (GO:0043531);;	K13457|0.0e+00|pmum:103334422|K13457 disease resistance protein RPM1 | (RefSeq) disease resistance protein RPM1-like	Plant-pathogen interaction (ko04626)	[T]	Signal transduction mechanisms	NB-ARC domain	Disease resistance protein RPM1 OS=Arabidopsis thaliana OX=3702 GN=RPM1 PE=1 SV=1	T	Signal transduction mechanisms	PREDICTED: disease resistance protein RPM1-like [Prunus mume]	biological process: response to stimulus (GO:0050896);; molecular function: binding (GO:0005488)
PaF106G0600024254.01	PaF106G0600024254.01	0.95	1.31	1.27	4.01	4.11	1.96	-1.18	down	40	52	59	185	159	88	7.32e-05	down	down	down	1.55e-05	down	7.32e-05	-1.18308	down	--	--	Molecular Function: iron ion binding (GO:0005506);; Cellular Component: membrane (GO:0016020);; Cellular Component: integral component of membrane (GO:0016021);; Molecular Function: oxidoreductase activity, acting on paired donors, with incorporation or reduction of molecular oxygen, NAD(P)H as one donor, and incorporation of one atom of oxygen (GO:0016709);; Molecular Function: heme binding (GO:…	K13260|5.4e-165|pmum:103337257|K13260 isoflavone/4'-methoxyisoflavone 2'-hydroxylase [EC:1.14.14.90 1.14.14.89] | (RefSeq) isoflavone 3'-hydroxylase-like	Isoflavonoid biosynthesis (ko00943)	[Q]	Secondary metabolites biosynthesis, transport and catabolism	Cytochrome P450	Cytochrome P450 81E8 OS=Medicago truncatula OX=3880 GN=CYP81E8 PE=2 SV=1	Q	Secondary metabolites biosynthesis, transport and catabolism	unnamed protein product [Prunus armeniaca]	molecular function: binding (GO:0005488);; cellular component: membrane (GO:0016020);; cellular component: membrane part (GO:0044425);; biological process: metabolic process (GO:0008152);; biological process: single-organism process (GO:0044699);; molecular function: catalytic activity (GO:0003824)
PaF106G0600022118.01	PaF106G0600022118.01	2.91	3.59	3.09	0.17	0.18	0.12	3.6	up	196	227	228	13	12	9	2.54e-41	up	up	up	3.39e-43	up	2.54e-41	3.60463	up	--	--	--	--	--	--	--	Protein of unknown function (DUF674)	--	S	Function unknown	uncharacterized protein LOC117632208 [Prunus dulcis]	--
PaF106G0100000450.01	PaF106G0100000450.01	3.04	3.36	4.14	9.92	10.6	8.84	-1.35	down	218	224	318	767	684	666	5.5e-21	down	down	down	1.99e-22	down	5.5e-21	-1.34817	down	[Q]	Secondary metabolites biosynthesis, transport and catabolism	Molecular Function: metal ion binding (GO:0046872);; Molecular Function: dioxygenase activity (GO:0051213);;	K13229|5.2e-82|ats:109766943|K13229 2,4-dihydroxy-1,4-benzoxazin-3-one-glucoside dioxygenase [EC:1.14.11.59] | (RefSeq) LOC109766943; DIBOA-glucoside dioxygenase BX6-like	Benzoxazinoid biosynthesis (ko00402)	[QR]	Secondary metabolites biosynthesis, transport and catabolism;; General function prediction only	2OG-Fe(II) oxygenase superfamily	1-aminocyclopropane-1-carboxylate oxidase homolog 1 OS=Arabidopsis thaliana OX=3702 GN=At1g06620 PE=2 SV=1	Q	Secondary metabolites biosynthesis, transport and catabolism	unnamed protein product [Prunus armeniaca]	molecular function: binding (GO:0005488);; biological process: metabolic process (GO:0008152);; biological process: single-organism process (GO:0044699);; molecular function: catalytic activity (GO:0003824)
PaF106G0100000441.01	PaF106G0100000441.01	1.46	1.79	2.26	6.99	6.31	7	-1.67	down	74	84	124	382	288	371	1.1e-17	down	down	down	4.85e-19	down	1.1e-17	-1.6714	down	[Q]	Secondary metabolites biosynthesis, transport and catabolism	Molecular Function: oxidoreductase activity (GO:0016491);; Molecular Function: metal ion binding (GO:0046872);;	K13229|8.9e-82|sita:101778204|K13229 2,4-dihydroxy-1,4-benzoxazin-3-one-glucoside dioxygenase [EC:1.14.11.59] | (RefSeq) DIBOA-glucoside dioxygenase BX6	Benzoxazinoid biosynthesis (ko00402)	[QR]	Secondary metabolites biosynthesis, transport and catabolism;; General function prediction only	2OG-Fe(II) oxygenase superfamily	1-aminocyclopropane-1-carboxylate oxidase homolog 1 OS=Arabidopsis thaliana OX=3702 GN=At1g06620 PE=2 SV=1	Q	Secondary metabolites biosynthesis, transport and catabolism	unnamed protein product [Prunus armeniaca]	molecular function: catalytic activity (GO:0003824);; molecular function: binding (GO:0005488)
PaF106G0100003482.01	PaF106G0100003482.01	7.66	11.98	10.15	4.72	3.36	4.17	1.28	up	536	786	774	358	214	302	1.19e-12	up	up	up	7.88e-14	up	1.19e-12	1.28344	up	--	--	Molecular Function: monooxygenase activity (GO:0004497);; Molecular Function: iron ion binding (GO:0005506);; Molecular Function: oxidoreductase activity, acting on paired donors, with incorporation or reduction of molecular oxygen (GO:0016705);; Molecular Function: heme binding (GO:0020037);;	K15639|9.2e-91|pavi:110765572|K15639 PHYB activation tagged suppressor 1 [EC:1.14.-.-] | (RefSeq) cytochrome P450 CYP749A22-like	Brassinosteroid biosynthesis (ko00905)	[QI]	Secondary metabolites biosynthesis, transport and catabolism;; Lipid transport and metabolism	Cytochrome P450	Cytochrome P450 CYP749A22 OS=Panax ginseng OX=4054 PE=2 SV=1	--	--	cytochrome P450 CYP749A22-like [Prunus avium]	biological process: metabolic process (GO:0008152);; biological process: single-organism process (GO:0044699);; molecular function: catalytic activity (GO:0003824);; molecular function: binding (GO:0005488)
PaF106G0800031812.01	PaF106G0800031812.01	3.67	3.92	3.37	11.9	11.99	13.31	-1.62	down	183	183	180	645	546	692	5.86e-27	down	down	down	1.46e-28	down	5.86e-27	-1.61899	down	[Q]	Secondary metabolites biosynthesis, transport and catabolism	Molecular Function: oxidoreductase activity (GO:0016491);; Molecular Function: metal ion binding (GO:0046872);;	K24028|8.9e-92|lja:Lj0g3v0213339.1|K24028 salicylic acid 3-hydroxylase [EC:1.14.11.-] | (RefSeq) Lj0g3v0213339.1; -	--	[QR]	Secondary metabolites biosynthesis, transport and catabolism;; General function prediction only	non-haem dioxygenase in morphine synthesis N-terminal	2-oxoglutarate-dependent dioxygenase 19 OS=Oryza sativa subsp. japonica OX=39947 GN=2ODD19 PE=1 SV=1	Q	Secondary metabolites biosynthesis, transport and catabolism	PREDICTED: protein DMR6-LIKE OXYGENASE 2-like [Prunus mume]	molecular function: catalytic activity (GO:0003824);; molecular function: binding (GO:0005488)
PaF106G0100001072.01	PaF106G0100001072.01	0.37	0.67	0.37	2.48	1.36	1.71	-1.5	down	26	44	28	185	86	125	1.21e-06	down	down	down	1.81e-07	down	1.21e-06	-1.50488	down	[V]	Defense mechanisms	Molecular Function: antiporter activity (GO:0015297);; Cellular Component: membrane (GO:0016020);; Cellular Component: integral component of membrane (GO:0016021);; Molecular Function: transmembrane transporter activity (GO:0022857);; Molecular Function: xenobiotic transporter activity (GO:0042910);;	K03327|1.7e-263|pmum:103323449|K03327 multidrug resistance protein, MATE family | (RefSeq) protein DETOXIFICATION 16-like	--	[R]	General function prediction only	MatE	Protein DETOXIFICATION 16 OS=Arabidopsis thaliana OX=3702 GN=DTX16 PE=2 SV=1	V	Defense mechanisms	unnamed protein product [Prunus armeniaca]	biological process: localization (GO:0051179);; molecular function: transporter activity (GO:0005215);; cellular component: membrane (GO:0016020);; cellular component: membrane part (GO:0044425)
PaF106G0500019002.01	PaF106G0500019002.01	0.43	0.23	0.41	2	3.2	2.38	-2.22	down	26	13	27	131	176	152	2.49e-14	down	down	down	1.44e-15	down	2.49e-14	-2.22351	down	--	--	Molecular Function: catalytic activity (GO:0003824);;	K15631|8.0e-20|ppp:112289964|K15631 molybdenum cofactor sulfurtransferase [EC:2.8.1.9] | (RefSeq) molybdenum cofactor sulfurase-like	Folate biosynthesis (ko00790)	--	--	--	--	H	Coenzyme transport and metabolism	unnamed protein product [Prunus armeniaca]	molecular function: catalytic activity (GO:0003824)
PaF106G0300013855.01	PaF106G0300013855.01	12.89	8.23	7.65	27.24	33.34	27.76	-1.33	down	1385	824	894	3185	3257	3147	6.12e-07	down	down	down	8.71e-08	down	6.12e-07	-1.32599	down	[QV]	Secondary metabolites biosynthesis, transport and catabolism;; Defense mechanisms	Molecular Function: iron ion binding (GO:0005506);; Cellular Component: membrane (GO:0016020);; Cellular Component: integral component of membrane (GO:0016021);; Molecular Function: oxidoreductase activity, acting on paired donors, with incorporation or reduction of molecular oxygen, NAD(P)H as one donor, and incorporation of one atom of oxygen (GO:0016709);; Molecular Function: heme binding (GO:…	K23136|5.9e-177|gra:105769156|K23136 fraxetin 5-hydroxylase [EC:1.14.14.164] | (RefSeq) uncharacterized LOC105769156	--	[Q]	Secondary metabolites biosynthesis, transport and catabolism	Cytochrome P450	Cytochrome P450 82A3 OS=Glycine max OX=3847 GN=CYP82A3 PE=2 SV=1	Q	Secondary metabolites biosynthesis, transport and catabolism	PREDICTED: cytochrome P450 CYP82D47-like [Prunus mume]	molecular function: binding (GO:0005488);; cellular component: membrane (GO:0016020);; cellular component: membrane part (GO:0044425);; biological process: metabolic process (GO:0008152);; biological process: single-organism process (GO:0044699);; molecular function: catalytic activity (GO:0003824);; biological process: response to stimulus (GO:0050896);; biological process: multi-organism proces…
PaF106G0400016408.01	PaF106G0400016408.01	1.08	1.73	1.93	5.07	6.55	5.56	-1.55	down	69	101	131	330	346	345	2.5e-13	down	down	down	1.57e-14	down	2.5e-13	-1.54764	down	[Q]	Secondary metabolites biosynthesis, transport and catabolism	Molecular Function: oxidoreductase activity (GO:0016491);; Molecular Function: metal ion binding (GO:0046872);;	K05658|4.1e-116|cpep:111781709|K05658 ATP-binding cassette, subfamily B (MDR/TAP), member 1 [EC:7.6.2.2] | (RefSeq) uncharacterized protein LOC111781709	ABC transporters (ko02010)	[QR]	Secondary metabolites biosynthesis, transport and catabolism;; General function prediction only	non-haem dioxygenase in morphine synthesis N-terminal	Protein SRG1 OS=Arabidopsis thaliana OX=3702 GN=SRG1 PE=2 SV=1	Q	Secondary metabolites biosynthesis, transport and catabolism	unnamed protein product [Prunus armeniaca]	molecular function: catalytic activity (GO:0003824);; molecular function: binding (GO:0005488)
PaF106G0600023960.01	PaF106G0600023960.01	4.62	4.99	4.88	0.35	0.38	0.07	2.52	up	601	605	689	50	45	11	7.39e-12	up	up	up	5.28e-13	up	7.39e-12	2.52453	up	--	--	Biological Process: defense response (GO:0006952);; Molecular Function: ADP binding (GO:0043531);;	K13457|0.0e+00|pper:18774035|K13457 disease resistance protein RPM1 | (RefSeq) disease resistance protein RPM1	Plant-pathogen interaction (ko04626)	[T]	Signal transduction mechanisms	NB-ARC domain	Disease resistance protein RPM1 OS=Arabidopsis thaliana OX=3702 GN=RPM1 PE=1 SV=1	T	Signal transduction mechanisms	disease resistance protein RPM1 [Prunus yedoensis var. nudiflora]	biological process: response to stimulus (GO:0050896);; molecular function: binding (GO:0005488)
PaF106G0700027595.01	PaF106G0700027595.01	2.48	2.76	1.56	0.91	0.92	1	1.16	up	211	200	143	84	69	86	5.07e-06	up	up	up	8.51e-07	up	5.07e-06	1.16245	up	[QV]	Secondary metabolites biosynthesis, transport and catabolism;; Defense mechanisms	Molecular Function: iron ion binding (GO:0005506);; Cellular Component: membrane (GO:0016020);; Molecular Function: oxidoreductase activity, acting on paired donors, with incorporation or reduction of molecular oxygen, NAD(P)H as one donor, and incorporation of one atom of oxygen (GO:0016709);; Molecular Function: heme binding (GO:0020037);;	K12153|1.7e-206|pper:18770648|K12153 phenylalanine N-monooxygenase [EC:1.14.14.40] | (RefSeq) isoleucine N-monooxygenase 2	Cyanoamino acid metabolism (ko00460);; Glucosinolate biosynthesis (ko00966);; 2-Oxocarboxylic acid metabolism (ko01210)	[Q]	Secondary metabolites biosynthesis, transport and catabolism	Cytochrome P450	Tryptophan N-monooxygenase CYP79A68 OS=Prunus mume OX=102107 GN=CYP79A68 PE=1 SV=1	Q	Secondary metabolites biosynthesis, transport and catabolism	unnamed protein product [Prunus armeniaca]	molecular function: binding (GO:0005488);; cellular component: membrane (GO:0016020);; biological process: metabolic process (GO:0008152);; biological process: single-organism process (GO:0044699);; molecular function: catalytic activity (GO:0003824)
PaF106G0500020276.01	PaF106G0500020276.01	6.16	5.45	6.44	2.49	2.43	3.12	1.17	up	416	344	473	184	150	222	2.17e-11	up	up	up	1.65e-12	up	2.17e-11	1.16559	up	[QV]	Secondary metabolites biosynthesis, transport and catabolism;; Defense mechanisms	Molecular Function: iron ion binding (GO:0005506);; Molecular Function: oxidoreductase activity, acting on paired donors, with incorporation or reduction of molecular oxygen (GO:0016705);; Molecular Function: heme binding (GO:0020037);;	K20665|2.8e-296|pmum:103338054|K20665 jasmonoyl-L-amino acid 12-hydroxylase [EC:1.14.14.48] | (RefSeq) cytochrome P450 94B3	--	[QI]	Secondary metabolites biosynthesis, transport and catabolism;; Lipid transport and metabolism	Cytochrome P450	Cytochrome P450 94B1 OS=Arabidopsis thaliana OX=3702 GN=CYP94B1 PE=1 SV=1	--	--	unnamed protein product [Prunus armeniaca]	molecular function: binding (GO:0005488);; biological process: metabolic process (GO:0008152);; biological process: single-organism process (GO:0044699);; molecular function: catalytic activity (GO:0003824)
PaF106G0100000062.01	PaF106G0100000062.01	1.65	1.82	1.88	0.78	1.04	0.66	1.06	up	110	108	135	56	59	44	6.92e-05	up	up	up	1.45e-05	up	6.92e-05	1.06329	up	--	--	--	K01593|5.4e-10|mtr:MTR_7g058700|K01593 aromatic-L-amino-acid/L-tryptophan decarboxylase [EC:4.1.1.28 4.1.1.105] | (RefSeq) tyrosine/DOPA decarboxylase	Tyrosine metabolism (ko00350);; Phenylalanine metabolism (ko00360);; Tryptophan metabolism (ko00380);; Isoquinoline alkaloid biosynthesis (ko00950);; Betalain biosynthesis (ko00965)	--	--	Protein of unknown function (DUF674)	--	--	--	PREDICTED: uncharacterized protein LOC103321024 [Prunus mume]	--
PaF106G0100005969.01	PaF106G0100005969.01	22.17	22.93	21.52	0	0.14	0.09	6.44	up	852	822	899	0	5	4	8.64e-137	up	up	up	1.38e-139	up	8.64e-137	6.44157	up	--	--	Molecular Function: DNA binding (GO:0003677);; Cellular Component: nucleus (GO:0005634);;	--	--	--	--	B3 DNA binding domain	--	K	Transcription	unnamed protein product [Prunus armeniaca]	molecular function: binding (GO:0005488);; cellular component: cell (GO:0005623);; cellular component: organelle (GO:0043226);; cellular component: cell part (GO:0044464)
PaF106G0400015256.01	PaF106G0400015256.01	0	0	0	4.86	5.73	5.28	-4.64	down	0	0	0	175	173	185	1.43e-44	down	down	down	1.69e-46	down	1.43e-44	-4.63631	down	[Q]	Secondary metabolites biosynthesis, transport and catabolism	Molecular Function: oxidoreductase activity (GO:0016491);; Molecular Function: metal ion binding (GO:0046872);;	K05278|4.0e-30|psom:113346476|K05278 flavonol synthase [EC:1.14.20.6] | (RefSeq) flavonol synthase/flavanone 3-hydroxylase-like	Flavonoid biosynthesis (ko00941)	[QR]	Secondary metabolites biosynthesis, transport and catabolism;; General function prediction only	2OG-Fe(II) oxygenase superfamily	Probable 2-oxoglutarate-dependent dioxygenase At5g05600 OS=Arabidopsis thaliana OX=3702 GN=At5g05600 PE=2 SV=1	Q	Secondary metabolites biosynthesis, transport and catabolism	unnamed protein product [Prunus armeniaca]	molecular function: catalytic activity (GO:0003824);; molecular function: binding (GO:0005488)
PaF106G0100000451.01	PaF106G0100000451.01	5.38	5.43	6.03	12.34	12.42	11.54	-1.01	down	354	334	432	884	744	802	1.56e-17	down	down	down	6.96e-19	down	1.56e-17	-1.00716	down	[Q]	Secondary metabolites biosynthesis, transport and catabolism	Molecular Function: metal ion binding (GO:0046872);; Molecular Function: dioxygenase activity (GO:0051213);;	K13229|5.2e-82|ats:109766943|K13229 2,4-dihydroxy-1,4-benzoxazin-3-one-glucoside dioxygenase [EC:1.14.11.59] | (RefSeq) LOC109766943; DIBOA-glucoside dioxygenase BX6-like	Benzoxazinoid biosynthesis (ko00402)	[QR]	Secondary metabolites biosynthesis, transport and catabolism;; General function prediction only	2OG-Fe(II) oxygenase superfamily	1-aminocyclopropane-1-carboxylate oxidase homolog 1 OS=Arabidopsis thaliana OX=3702 GN=At1g06620 PE=2 SV=1	Q	Secondary metabolites biosynthesis, transport and catabolism	PREDICTED: 1-aminocyclopropane-1-carboxylate oxidase homolog 1-like [Prunus mume]	molecular function: binding (GO:0005488);; biological process: metabolic process (GO:0008152);; biological process: single-organism process (GO:0044699);; molecular function: catalytic activity (GO:0003824)
PaF106G0400015265.01	PaF106G0400015265.01	0.86	1.42	1.66	0.22	0.68	0.34	1.2	up	42	64	87	12	30	18	0.00109781	up	up	up	0.000305921	up	0.00109781	1.19606	up	[Q]	Secondary metabolites biosynthesis, transport and catabolism	Molecular Function: oxidoreductase activity (GO:0016491);; Molecular Function: metal ion binding (GO:0046872);;	K14975|1.7e-58|psom:113311621|K14975 codeine 3-O-demethylase [EC:1.14.11.32] | (RefSeq) codeine O-demethylase	Isoquinoline alkaloid biosynthesis (ko00950)	[QR]	Secondary metabolites biosynthesis, transport and catabolism;; General function prediction only	non-haem dioxygenase in morphine synthesis N-terminal	Protein SRG1 OS=Arabidopsis thaliana OX=3702 GN=SRG1 PE=2 SV=1	Q	Secondary metabolites biosynthesis, transport and catabolism	unnamed protein product [Prunus armeniaca]	molecular function: catalytic activity (GO:0003824);; molecular function: binding (GO:0005488)
PaF106G0700027391.01	PaF106G0700027391.01	4.86	2.72	3.04	11.14	9.47	9.58	-1.3	down	224	117	152	556	395	464	1.35e-09	down	down	down	1.27e-10	down	1.35e-09	-1.29881	down	--	--	Molecular Function: DNA binding (GO:0003677);; Cellular Component: nucleus (GO:0005634);;	--	--	--	--	B3 DNA binding domain	--	--	--	PREDICTED: B3 [Prunus dulcis]	molecular function: binding (GO:0005488);; cellular component: cell (GO:0005623);; cellular component: organelle (GO:0043226);; cellular component: cell part (GO:0044464)
PaF106G0800030915.01	PaF106G0800030915.01	0.43	0.63	0.43	0.15	0.18	0.12	1.38	up	49	66	53	15	19	13	8.25e-05	up	up	up	1.77e-05	up	8.25e-05	1.38397	up	[T]	Signal transduction mechanisms	Molecular Function: protein kinase activity (GO:0004672);; Molecular Function: ATP binding (GO:0005524);; Cellular Component: integral component of membrane (GO:0016021);;	K20181|4.4e-103|mtr:MTR_5g026090|K20181 vacuolar protein sorting-associated protein 18 | (RefSeq) vacuolar sorting-associated-like protein	--	--	--	Protein tyrosine and serine/threonine kinase	Probable LRR receptor-like serine/threonine-protein kinase At3g47570 OS=Arabidopsis thaliana OX=3702 GN=At3g47570 PE=2 SV=1	--	--	PREDICTED: probable LRR receptor-like serine/threonine-protein kinase At3g47570 [Prunus mume]	biological process: metabolic process (GO:0008152);; biological process: cellular process (GO:0009987);; molecular function: catalytic activity (GO:0003824);; molecular function: binding (GO:0005488);; cellular component: membrane (GO:0016020);; cellular component: membrane part (GO:0044425)
PaF106G0400016458.01	PaF106G0400016458.01	10.48	22.54	19.9	7.92	7.28	9.46	1.07	up	575	1152	1185	473	363	547	6.03e-07	up	up	up	8.57e-08	up	6.03e-07	1.06738	up	[Q]	Secondary metabolites biosynthesis, transport and catabolism	Biological Process: response to light stimulus (GO:0009416);; Biological Process: gibberellin catabolic process (GO:0045487);; Molecular Function: metal ion binding (GO:0046872);; Molecular Function: dioxygenase activity (GO:0051213);; Molecular Function: C-19 gibberellin 2-beta-dioxygenase activity (GO:0052634);;	K04125|5.7e-138|pmum:103325827|K04125 gibberellin 2beta-dioxygenase [EC:1.14.11.13] | (RefSeq) gibberellin 2-beta-dioxygenase 1-like	Diterpenoid biosynthesis (ko00904)	[QR]	Secondary metabolites biosynthesis, transport and catabolism;; General function prediction only	non-haem dioxygenase in morphine synthesis N-terminal	Gibberellin 2-beta-dioxygenase 1 OS=Pisum sativum OX=3888 GN=GA2OX1 PE=1 SV=1	Q	Secondary metabolites biosynthesis, transport and catabolism	PREDICTED: gibberellin 2-beta-dioxygenase 1-like [Prunus mume]	biological process: response to stimulus (GO:0050896);; biological process: metabolic process (GO:0008152);; biological process: cellular process (GO:0009987);; biological process: single-organism process (GO:0044699);; molecular function: binding (GO:0005488);; molecular function: catalytic activity (GO:0003824)
PaF106G0100002809.01	PaF106G0100002809.01	4.31	3.54	5.07	1.67	1.86	1.48	1.27	up	164	126	210	70	65	60	1.39e-07	up	up	up	1.76e-08	up	1.39e-07	1.27232	up	[QV]	Secondary metabolites biosynthesis, transport and catabolism;; Defense mechanisms	Molecular Function: iron ion binding (GO:0005506);; Cellular Component: membrane (GO:0016020);; Molecular Function: oxidoreductase activity, acting on paired donors, with incorporation or reduction of molecular oxygen, NAD(P)H as one donor, and incorporation of one atom of oxygen (GO:0016709);; Molecular Function: heme binding (GO:0020037);;	K23810|1.3e-109|vvi:100855232|K23810 (E)-8-carboxylinalool synthase [EC:1.14.14.-] | (RefSeq) geraniol 8-hydroxylase	Monoterpenoid biosynthesis (ko00902)	[Q]	Secondary metabolites biosynthesis, transport and catabolism	Cytochrome P450	Geraniol 8-hydroxylase OS=Catharanthus roseus OX=4058 GN=CYP76B6 PE=1 SV=1	Q	Secondary metabolites biosynthesis, transport and catabolism	geraniol 8-hydroxylase [Prunus persica]	molecular function: binding (GO:0005488);; cellular component: membrane (GO:0016020);; biological process: metabolic process (GO:0008152);; biological process: single-organism process (GO:0044699);; molecular function: catalytic activity (GO:0003824)
PaF106G0800029849.01	PaF106G0800029849.01	2.32	2.62	1.88	0.45	1.16	0.98	1.15	up	106	112	94	23	49	48	0.000372758	up	up	up	9.25e-05	up	0.000372758	1.1481	up	[Q]	Secondary metabolites biosynthesis, transport and catabolism	Molecular Function: metal ion binding (GO:0046872);; Molecular Function: dioxygenase activity (GO:0051213);;	K13229|4.3e-75|ats:109766943|K13229 2,4-dihydroxy-1,4-benzoxazin-3-one-glucoside dioxygenase [EC:1.14.11.59] | (RefSeq) LOC109766943; DIBOA-glucoside dioxygenase BX6-like	Benzoxazinoid biosynthesis (ko00402)	[QR]	Secondary metabolites biosynthesis, transport and catabolism;; General function prediction only	2OG-Fe(II) oxygenase superfamily	1-aminocyclopropane-1-carboxylate oxidase homolog 1 OS=Arabidopsis thaliana OX=3702 GN=At1g06620 PE=2 SV=1	Q	Secondary metabolites biosynthesis, transport and catabolism	PREDICTED: 1-aminocyclopropane-1-carboxylate oxidase homolog 1-like [Prunus mume]	molecular function: binding (GO:0005488);; biological process: metabolic process (GO:0008152);; biological process: single-organism process (GO:0044699);; molecular function: catalytic activity (GO:0003824)
PaF106G0100006698.01	PaF106G0100006698.01	11.17	11.21	12.62	1.07	1.19	1.57	2.91	up	292	273	358	31	29	44	6.05e-41	up	up	up	8.28e-43	up	6.05e-41	2.91316	up	--	--	Molecular Function: DNA binding (GO:0003677);; Cellular Component: nucleus (GO:0005634);;	--	--	--	--	B3 DNA binding domain	--	K	Transcription	uncharacterized protein LOC110765763 [Prunus avium]	molecular function: binding (GO:0005488);; cellular component: cell (GO:0005623);; cellular component: organelle (GO:0043226);; cellular component: cell part (GO:0044464)
在败育中		上调	10
		下调	7
		未表达	1
