# Supplementary material for: Mining for genes related to pistil abortion in Prunus sibirica L
Source: PeerJ. 2022 Nov 15;10:e14366. doi: 10.7717/peerj.14366 (PMC9673769; doi:10.7717/peerj.14366)
Supplement: Table S17 [file peerj-10-14366-s017.xls]

## Sheet: Sheet1
Table S17 Distribution of transcription factor families
Gene_ID	Target_Protein	TF_Family
PaF106G0100000013.01	Jcr4S02193.10	NF-YB
PaF106G0100000062.01	mrna07861.1-v1.0-hybrid	B3
PaF106G0100000099.01	PDK_30s873781g005	C3H
PaF106G0100000148.01	MEDTR3G005900.1	M-type
PaF106G0100000157.01	MEDTR3G005900.1	M-type
PaF106G0100000244.01	Potri.T074200.1	NAC
PaF106G0100000423.01	OpuncBB_FGP24418	bZIP
PaF106G0100000431.01	mrna00901.1-v1.0-hybrid	bHLH
PaF106G0100000441.01	Bra001729	B3
PaF106G0100000450.01	Bra001729	B3
PaF106G0100000451.01	Bra001729	B3
PaF106G0100000452.01	Bra001729	B3
PaF106G0100000524.01	419761	EIL
PaF106G0100000566.01	EMT03342	WRKY
PaF106G0100000568.01	PDK_30s728141g003	G2-like
PaF106G0100000577.01	EMT03342	WRKY
PaF106G0100000612.01	Lus10030581	bHLH
PaF106G0100000717.01	C.cajan_44612	S1Fa-like
PaF106G0100000801.01	Lus10007348	MYB_related
PaF106G0100000806.01	MDP0000183819	bHLH
PaF106G0100000807.01	MDP0000183819	bHLH
PaF106G0100000829.01	PK03054.1	HD-ZIP
PaF106G0100000856.01	Sobic.004G040700.1.p	C2H2
PaF106G0100000860.01	ppa010972m	bHLH
PaF106G0100000940.01	MDP0000295593	bHLH
PaF106G0100000980.01	AT4G12020.2	WRKY
PaF106G0100001072.01	MDP0000242456	B3
PaF106G0100001107.01	ppa007083m	CO-like
PaF106G0100001238.01	Lus10043264	YABBY
PaF106G0100001268.01	ObartAA03S_FGP7846	GATA
PaF106G0100001278.01	Bra021627	LBD
PaF106G0100001283.01	Scf00089.g7885.t1	B3
PaF106G0100001314.01	Bra001729	B3
PaF106G0100001343.01	ppa006909m	WRKY
PaF106G0100001357.01	Potri.012G137500.1	FAR1
PaF106G0100001412.01	Pbr002083.1	ERF
PaF106G0100001469.01	Jcr4S05030.40	MYB
PaF106G0100001486.01	MDP0000283274	B3
PaF106G0100001534.01	mrna24941.1-v1.0-hybrid	DBB
PaF106G0100001674.01	MDP0000321461	G2-like
PaF106G0100001708.01	mrna29552.1-v1.0-hybrid	C2H2
PaF106G0100001729.01	426818	MYB_related
PaF106G0100001851.01	MEDTR3G005900.1	M-type
PaF106G0100001853.01	MEDTR3G005900.1	M-type
PaF106G0100001855.01	MEDTR3G005900.1	M-type
PaF106G0100001865.01	AT1G64100.2	NAC
PaF106G0100001879.01	AT1G64100.2	NAC
PaF106G0100001890.01	Scf00343.g15875.t1	ARF
PaF106G0100001892.01	MEDTR3G005900.1	M-type
PaF106G0100001908.01	Jcr4S11886.30	HSF
PaF106G0100001977.01	Lus10007348	MYB_related
PaF106G0100001985.01	OB01G21870.1	WRKY
PaF106G0100001994.01	Bra013842	GeBP
PaF106G0100001997.01	Bra013842	GeBP
PaF106G0100002006.01	Pbr042464.1	GRAS
PaF106G0100002088.01	MDP0000320566	NAC
PaF106G0100002301.01	Thecc1EG011369t1	FAR1
PaF106G0100002349.01	Pbr015419.1	C3H
PaF106G0100002422.01	C.cajan_44612	S1Fa-like
PaF106G0100002425.01	OpuncBB_FGP22587	MYB_related
PaF106G0100002450.01	EuGene.0900010205	C3H
PaF106G0100002451.01	EuGene.0900010205	C3H
PaF106G0100002453.01	EuGene.0900010205	C3H
PaF106G0100002461.01	EuGene.0900010205	C3H
PaF106G0100002570.01	MDP0000296303	bZIP
PaF106G0100002664.01	ObartAA03S_FGP8394	NAC
PaF106G0100002724.01	ppa023657m	SBP
PaF106G0100002765.01	MDP0000120576	MYB_related
PaF106G0100002794.01	Bra013842	GeBP
PaF106G0100002800.01	Bra013842	GeBP
PaF106G0100002801.01	Bra013842	GeBP
PaF106G0100002809.01	Thecc1EG000515t1	B3
PaF106G0100002813.01	Bra013842	GeBP
PaF106G0100002943.01	Bra013842	GeBP
PaF106G0100003015.01	Pbr023394.1	C2H2
PaF106G0100003029.01	MDP0000263713	YABBY
PaF106G0100003173.01	MDP0000298505	MYB
PaF106G0100003267.01	mrna25984.1-v1.0-hybrid	bHLH
PaF106G0100003312.01	ppa025260m	MYB
PaF106G0100003324.01	ppa009530m	NAC
PaF106G0100003391.01	MDP0000277077	NF-YB
PaF106G0100003482.01	Lus10019354	B3
PaF106G0100003722.01	ppa010885m	bHLH
PaF106G0100003916.01	mrna31843.1-v1.0-hybrid	WRKY
PaF106G0100003994.01	GRMZM2G351232_P01	E2F/DP
PaF106G0100004010.01	Scf00027.g3467.t1	bHLH
PaF106G0100004135.01	Bol009735	YABBY
PaF106G0100004257.01	OpuncBB_FGP24461	G2-like
PaF106G0100004306.01	OpuncBB_FGP24461	G2-like
PaF106G0100004308.01	mrna20108.1-v1.0-hybrid	NF-YB
PaF106G0100004439.01	MDP0000262020	bHLH
PaF106G0100004447.01	EMT20798	MYB_related
PaF106G0100004453.01	MDP0000265073	NAC
PaF106G0100004475.01	ppa023369m	ZF-HD
PaF106G0100004522.01	EMT28005	MYB_related
PaF106G0100004527.01	MA_10428770g0010	WRKY
PaF106G0100004578.01	ppa021685m	G2-like
PaF106G0100004690.01	Lus10038670	NAC
PaF106G0100004692.01	Lus10038670	NAC
PaF106G0100004696.01	Lus10038670	NAC
PaF106G0100004783.01	Pbr019883.1	WRKY
PaF106G0100004813.01	Bradi2g44117.1	bHLH
PaF106G0100004836.01	ppa018120m	GATA
PaF106G0100004904.01	ppa023077m	AP2
PaF106G0100004908.01	ppa019623m	GRF
PaF106G0100004914.01	ppa021433m	bZIP
PaF106G0100005060.01	ObartAA03S_FGP24861	G2-like
PaF106G0100005062.01	ppa026635m	HSF
PaF106G0100005229.01	C.cajan_45119	C3H
PaF106G0100005263.01	OpuncBB_FGP22587	MYB_related
PaF106G0100005274.01	MDP0000198333	bHLH
PaF106G0100005309.01	Pbr031344.1	C2H2
PaF106G0100005449.01	PH01003957G0030	E2F/DP
PaF106G0100005494.01	GSVIVT01019717001	ERF
PaF106G0100005503.01	Pbr039133.1	AP2
PaF106G0100005506.01	GSVIVT01019717001	ERF
PaF106G0100005594.01	XP_004513029	ERF
PaF106G0100005690.01	BGIOSGA030830-PA	MYB
PaF106G0100005692.01	BGIOSGA030830-PA	MYB
PaF106G0100005726.01	mrna12442.1-v1.0-hybrid	NAC
PaF106G0100005745.01	Potri.012G137500.1	FAR1
PaF106G0100005775.01	GSVIVT01019717001	ERF
PaF106G0100005795.01	Bra001729	B3
PaF106G0100005824.01	PH01002606G0040	HSF
PaF106G0100005865.01	MDP0000165802	RAV
PaF106G0100005867.01	MDP0000165802	RAV
PaF106G0100005868.01	MDP0000165802	RAV
PaF106G0100005870.01	MDP0000165802	RAV
PaF106G0100005871.01	MDP0000165802	RAV
PaF106G0100005910.01	mrna03614.1-v1.0-hybrid	C2H2
PaF106G0100005920.01	MDP0000304584	C3H
PaF106G0100005969.01	MDP0000309874	B3
PaF106G0100005998.01	PH01002606G0040	HSF
PaF106G0100006004.01	MDP0000574942	MYB
PaF106G0100006009.01	BGIOSGA033765-PA	GATA
PaF106G0100006049.01	Lus10009218	C2H2
PaF106G0100006058.01	mrna05500.1-v1.0-hybrid	HB-other
PaF106G0100006087.01	EMS59827	ERF
PaF106G0100006216.01	AC202489_11.1	WRKY
PaF106G0100006218.01	AC202489_11.1	WRKY
PaF106G0100006225.01	Pbr004866.1	bHLH
PaF106G0100006242.01	MDP0000242456	B3
PaF106G0100006300.01	MDP0000180046	NAC
PaF106G0100006311.01	Potri.012G137500.1	FAR1
PaF106G0100006312.01	Lus10003386	bHLH
PaF106G0100006316.01	PH01002606G0040	HSF
PaF106G0100006344.01	ppa011140m	MIKC
PaF106G0100006388.01	MDP0000180046	NAC
PaF106G0100006391.01	MDP0000186332	ERF
PaF106G0100006392.01	Potri.T074200.1	NAC
PaF106G0100006399.01	ppa014627m	M-type
PaF106G0100006400.01	ORGLA03G0372200.1	MYB_related
PaF106G0100006404.01	PH01002606G0040	HSF
PaF106G0100006405.01	PH01002606G0040	HSF
PaF106G0100006439.01	Potri.T074200.1	NAC
PaF106G0100006453.01	GSMUA_Achr9P13010_001	MIKC
PaF106G0100006458.01	Can011627	B3
PaF106G0100006463.01	mrna03614.1-v1.0-hybrid	C2H2
PaF106G0100006468.01	XP_004512106	C3H
PaF106G0100006472.01	Potri.T074200.1	NAC
PaF106G0100006479.01	Potri.T074200.1	NAC
PaF106G0100006489.01	Potri.T074200.1	NAC
PaF106G0100006520.01	MDP0000180046	NAC
PaF106G0100006528.01	Jcr4S05030.40	MYB
PaF106G0100006531.01	Pbr039133.1	AP2
PaF106G0100006536.01	GSVIVT01019717001	ERF
PaF106G0100006559.01	MDP0000283975	NAC
PaF106G0100006626.01	Jcr4S02193.10	NF-YB
PaF106G0100006656.01	mrna19889.1-v1.0-hybrid	C3H
PaF106G0100006682.01	mrna19889.1-v1.0-hybrid	C3H
PaF106G0100006698.01	ppa023244m	B3
PaF106G0100006700.01	Thecc1EG000515t1	B3
PaF106G0200006790.01	GSMUA_Achr4P07150_001	NAC
PaF106G0200006798.01	PDK_30s891671g001	bHLH
PaF106G0200006841.01	Jcr4S00282.90	NAC
PaF106G0200006844.01	Lus10031505	NF-YA
PaF106G0200006845.01	Lus10031505	NF-YA
PaF106G0200006848.01	Lus10031505	NF-YA
PaF106G0200006850.01	Lus10031505	NF-YA
PaF106G0200006904.01	Lus10030908	bHLH
PaF106G0200006908.01	Lus10030908	bHLH
PaF106G0200007038.01	MDP0000265073	NAC
PaF106G0200007071.01	MEDTR3G005900.1	M-type
PaF106G0200007072.01	MEDTR3G005900.1	M-type
PaF106G0200007074.01	MA_11351g0010	WRKY
PaF106G0200007099.01	MDP0000578301	WRKY
PaF106G0200007121.01	PGSC0003DMP400000652	bHLH
PaF106G0200007131.01	AT1G64100.2	NAC
PaF106G0200007143.01	MEDTR3G005900.1	M-type
PaF106G0200007167.01	ppa002082m	ARF
PaF106G0200007192.01	Aan020124	MYB
PaF106G0200007209.01	Bra039779	S1Fa-like
PaF106G0200007240.01	MEDTR3G005900.1	M-type
PaF106G0200007243.01	MEDTR3G005900.1	M-type
PaF106G0200007246.01	MEDTR3G005900.1	M-type
PaF106G0200007275.01	PH01001474G0470	HB-other
PaF106G0200007276.01	PH01001474G0470	HB-other
PaF106G0200007281.01	PH01001474G0470	HB-other
PaF106G0200007289.01	MEDTR3G005900.1	M-type
PaF106G0200007291.01	MEDTR3G005900.1	M-type
PaF106G0200007295.01	MEDTR3G005900.1	M-type
PaF106G0200007328.01	MEDTR3G005900.1	M-type
PaF106G0200007369.01	MEDTR3G005900.1	M-type
PaF106G0200007374.01	MEDTR3G005900.1	M-type
PaF106G0200007383.01	MEDTR3G005900.1	M-type
PaF106G0200007390.01	MEDTR3G005900.1	M-type
PaF106G0200007393.01	MEDTR3G005900.1	M-type
PaF106G0200007395.01	MEDTR3G005900.1	M-type
PaF106G0200007412.01	PH01000841G0210	HD-ZIP
PaF106G0200007416.01	mrna09125.1-v1.0-hybrid	bHLH
PaF106G0200007469.01	Scf00343.g15875.t1	ARF
PaF106G0200007538.01	Bra003867	NF-YA
PaF106G0200007544.01	MDP0000257606	B3
PaF106G0200007549.01	Potri.T074200.1	NAC
PaF106G0200007569.01	Potri.T074200.1	NAC
PaF106G0200007609.01	Lus10019708	NF-YA
PaF106G0200007686.01	MDP0000201120	Dof
PaF106G0200007693.01	Jcr4S16185.10	NAC
PaF106G0200007808.01	Bra013842	GeBP
PaF106G0200007810.01	Bra013842	GeBP
PaF106G0200007828.01	MDP0000165802	RAV
PaF106G0200008088.01	mrna19889.1-v1.0-hybrid	C3H
PaF106G0200008109.01	Can015737	C3H
PaF106G0200008156.01	Bra039779	S1Fa-like
PaF106G0200008157.01	mrna09125.1-v1.0-hybrid	bHLH
PaF106G0200008171.01	Lus10038670	NAC
PaF106G0200008233.01	ppa021970m	M-type
PaF106G0200008249.01	MEDTR3G005900.1	M-type
PaF106G0200008252.01	LOC_Os07g17230.1	B3
PaF106G0200008308.01	LOC_Os12g06010.1	bZIP
PaF106G0200008335.01	Bradi2g44117.1	bHLH
PaF106G0200008345.01	Lsa008231	WRKY
PaF106G0200008349.01	Lsa008231	WRKY
PaF106G0200008354.01	Lsa008231	WRKY
PaF106G0200008357.01	Lsa008231	WRKY
PaF106G0200008405.01	MDP0000296303	bZIP
PaF106G0200008425.01	Lsa008231	WRKY
PaF106G0200008433.01	mrna03900.1-v1.0-hybrid	WRKY
PaF106G0200008436.01	Lsa008231	WRKY
PaF106G0200008532.01	ppa008560m	SBP
PaF106G0200008578.01	PK03054.1	HD-ZIP
PaF106G0200008647.01	GSVIVT01019717001	ERF
PaF106G0200008699.01	MDP0000265073	NAC
PaF106G0200008738.01	Lus10043264	YABBY
PaF106G0200008741.01	Bra013842	GeBP
PaF106G0200008745.01	Bradi2g44117.1	bHLH
PaF106G0200008766.01	MDP0000464809	GRAS
PaF106G0200008836.01	mrna19889.1-v1.0-hybrid	C3H
PaF106G0200008837.01	mrna19889.1-v1.0-hybrid	C3H
PaF106G0200008854.01	MDP0000277077	NF-YB
PaF106G0200008873.01	mrna19115.1-v1.0-hybrid	MYB
PaF106G0200008900.01	MDP0000191614	NAC
PaF106G0200008981.01	OpuncBB_FGP10756	bZIP
PaF106G0200009060.01	PH01002606G0040	HSF
PaF106G0200009065.01	PH01002606G0040	HSF
PaF106G0200009093.01	Lus10001876	NAC
PaF106G0200009202.01	MDP0000298505	MYB
PaF106G0200009263.01	ppa009439m	MYB
PaF106G0200009482.01	mrna09125.1-v1.0-hybrid	bHLH
PaF106G0200009483.01	mrna09125.1-v1.0-hybrid	bHLH
PaF106G0200009605.01	MDP0000121180	G2-like
PaF106G0200009654.01	EMT07921	FAR1
PaF106G0200009721.01	mrna07861.1-v1.0-hybrid	B3
PaF106G0200009738.01	NNU_016725-RA	GRAS
PaF106G0200009803.01	Pbr002083.1	ERF
PaF106G0200009874.01	OpuncBB_FGP24461	G2-like
PaF106G0200009897.01	PH01002606G0040	HSF
PaF106G0200010082.01	BGIOSGA012704-PA	MYB_related
PaF106G0200010085.01	MDP0000449389	M-type
PaF106G0200010176.01	mrna04303.1-v1.0-hybrid	NAC
PaF106G0200010194.01	Aquca_022_00261.1	Trihelix
PaF106G0200010244.01	Pbr031344.1	C2H2
PaF106G0200010358.01	MDP0000305994	S1Fa-like
PaF106G0200010499.01	Bradi2g44117.1	bHLH
PaF106G0200010531.01	MDP0000294614	NAC
PaF106G0200010540.01	EMS59827	ERF
PaF106G0200010558.01	MDP0000265616	NAC
PaF106G0200010567.01	Pbr018668.1	C2H2
PaF106G0200010730.01	ppa011221m	HD-ZIP
PaF106G0200010753.01	ObartAA03S_FGP31756	NAC
PaF106G0200010775.01	Bra001729	B3
PaF106G0300010966.01	Tae001339	NAC
PaF106G0300011070.01	BGIOSGA030830-PA	MYB
PaF106G0300011181.01	mgv1a026303m	LBD
PaF106G0300011199.01	GRMZM2G138454_P02	bHLH
PaF106G0300011223.01	GSMUA_Achr9P07000_001	MYB
PaF106G0300011239.01	Potri.012G137500.1	FAR1
PaF106G0300011255.01	ppa009747m	HD-ZIP
PaF106G0300011264.01	mrna09125.1-v1.0-hybrid	bHLH
PaF106G0300011576.01	PH01002606G0040	HSF
PaF106G0300011602.01	MDP0000710259	MYB
PaF106G0300011625.01	Lsa009820	bHLH
PaF106G0300011662.01	ppa010249m	MIKC
PaF106G0300011680.01	Potri.012G137500.1	FAR1
PaF106G0300011713.01	ppa007007m	CO-like
PaF106G0300011745.01	MDP0000265073	NAC
PaF106G0300011888.01	Scf00370.g16417.t1	GATA
PaF106G0300011891.01	mrna09125.1-v1.0-hybrid	bHLH
PaF106G0300011913.01	mrna32207.1-v1.0-hybrid	TALE
PaF106G0300011916.01	MDP0000284686	G2-like
PaF106G0300011917.01	mrna32207.1-v1.0-hybrid	TALE
PaF106G0300011919.01	mrna32207.1-v1.0-hybrid	TALE
PaF106G0300011925.01	mrna32207.1-v1.0-hybrid	TALE
PaF106G0300011931.01	mrna16294.1-v1.0-hybrid	CAMTA
PaF106G0300011959.01	MDP0000245233	bHLH
PaF106G0300011965.01	Bradi4g38630.1	BES1
PaF106G0300012012.01	EMS59827	ERF
PaF106G0300012067.01	PGSC0003DMP400025709	AP2
PaF106G0300012104.01	EMT21109	GeBP
PaF106G0300012152.01	Bra037509	GRAS
PaF106G0300012156.01	Bra037509	GRAS
PaF106G0300012159.01	Bra037509	GRAS
PaF106G0300012161.01	Bra037509	GRAS
PaF106G0300012162.01	Bra037509	GRAS
PaF106G0300012164.01	Lus10003001	MYB
PaF106G0300012172.01	Jcr4S02193.10	NF-YB
PaF106G0300012238.01	AC202489_11.1	WRKY
PaF106G0300012241.01	mrna19889.1-v1.0-hybrid	C3H
PaF106G0300012306.01	PH01002606G0040	HSF
PaF106G0300012314.01	PH01002606G0040	HSF
PaF106G0300012319.01	PH01002606G0040	HSF
PaF106G0300012323.01	PH01002606G0040	HSF
PaF106G0300012326.01	PH01002606G0040	HSF
PaF106G0300012327.01	PH01002606G0040	HSF
PaF106G0300012363.01	GSVIVT01032785001	ERF
PaF106G0300012373.01	PH01002606G0040	HSF
PaF106G0300012375.01	PH01002606G0040	HSF
PaF106G0300012378.01	EMT07921	FAR1
PaF106G0300012392.01	Bra013842	GeBP
PaF106G0300012396.01	Bra013842	GeBP
PaF106G0300012429.01	EMT07921	FAR1
PaF106G0300012431.01	EMT07921	FAR1
PaF106G0300012442.01	EMS59827	ERF
PaF106G0300012467.01	MDP0000244794	G2-like
PaF106G0300012543.01	Bradi2g44117.1	bHLH
PaF106G0300012568.01	EMT28879	ERF
PaF106G0300012720.01	ppa025775m	bHLH
PaF106G0300012744.01	MDP0000261154	bZIP
PaF106G0300012745.01	MDP0000261154	bZIP
PaF106G0300012858.01	mrna09125.1-v1.0-hybrid	bHLH
PaF106G0300012867.01	mrna09125.1-v1.0-hybrid	bHLH
PaF106G0300012869.01	mrna32207.1-v1.0-hybrid	TALE
PaF106G0300012916.01	Jcr4S02252.50	B3
PaF106G0300012952.01	MDP0000311595	NF-YA
PaF106G0300012958.01	ObartAA03S_FGP31295	NAC
PaF106G0300012972.01	MDP0000296303	bZIP
PaF106G0300013028.01	PK03054.1	HD-ZIP
PaF106G0300013030.01	Bra039779	S1Fa-like
PaF106G0300013167.01	Pbr002083.1	ERF
PaF106G0300013389.01	ObartAA03S_FGP14057	G2-like
PaF106G0300013402.01	GSVIVT01030085001	NF-YB
PaF106G0300013414.01	GSVIVT01007832001	E2F/DP
PaF106G0300013421.01	ppa007768m	AP2
PaF106G0300013589.01	GRMZM2G312201_P01	NAC
PaF106G0300013592.01	mrna09125.1-v1.0-hybrid	bHLH
PaF106G0300013611.01	Pbr026954.1	CO-like
PaF106G0300013667.01	MDP0000578301	WRKY
PaF106G0300013674.01	MEDTR3G005900.1	M-type
PaF106G0300013739.01	Bra001729	B3
PaF106G0300013855.01	Thecc1EG000515t1	B3
PaF106G0300013898.01	MDP0000311595	NF-YA
PaF106G0300013919.01	PH01003957G0030	E2F/DP
PaF106G0300013971.01	MDP0000198333	bHLH
PaF106G0300014127.01	ppa015833m	AP2
PaF106G0300014130.01	ppa017593m	GRF
PaF106G0300014136.01	Can007368	ERF
PaF106G0300014137.01	MDP0000131822	MYB
PaF106G0300014138.01	Can015737	C3H
PaF106G0300014285.01	Scf00343.g15875.t1	ARF
PaF106G0300014317.01	Jcr4S02193.10	NF-YB
PaF106G0300014318.01	Jcr4S02193.10	NF-YB
PaF106G0300014323.01	MDP0000194672	HSF
PaF106G0300014441.01	Neem_2071_f_3	WRKY
PaF106G0300014458.01	ppa005083m	MYB_related
PaF106G0300014513.01	Lsa008231	WRKY
PaF106G0300014540.01	EMS53359	WRKY
PaF106G0300014550.01	MDP0000322059	LBD
PaF106G0300014581.01	MDP0000320566	NAC
PaF106G0400014668.01	Jcr4S02193.10	NF-YB
PaF106G0400014718.01	Eucgr.H02157.1	MYB_related
PaF106G0400014719.01	Potri.T074200.1	NAC
PaF106G0400014727.01	Carubv10001414m	bZIP
PaF106G0400014754.01	ppa009438m	NAC
PaF106G0400014792.01	MDP0000449389	M-type
PaF106G0400014797.01	EMS56798	HB-other
PaF106G0400014852.01	Potri.T074200.1	NAC
PaF106G0400015069.01	Pbr023394.1	C2H2
PaF106G0400015254.01	Bra001729	B3
PaF106G0400015256.01	Bra001729	B3
PaF106G0400015265.01	Bra001729	B3
PaF106G0400015277.01	mrna15264.1-v1.0-hybrid	FAR1
PaF106G0400015286.01	MDP0000305994	S1Fa-like
PaF106G0400015290.01	Jcr4S02193.10	NF-YB
PaF106G0400015293.01	MDP0000242297	NAC
PaF106G0400015294.01	Jcr4S02193.10	NF-YB
PaF106G0400015323.01	329122	C3H
PaF106G0400015359.01	Pbr038274.1	bHLH
PaF106G0400015367.01	MDP0000191614	NAC
PaF106G0400015463.01	MDP0000134067	C3H
PaF106G0400015505.01	mrna19889.1-v1.0-hybrid	C3H
PaF106G0400015511.01	GSVIVT01019630001	MIKC
PaF106G0400015614.01	MDP0000283975	NAC
PaF106G0400015672.01	MDP0000319957	ARF
PaF106G0400015715.01	GSMUA_Achr7P25320_001	TCP
PaF106G0400015835.01	MDP0000265073	NAC
PaF106G0400015872.01	MDP0000245233	bHLH
PaF106G0400015900.01	MDP0000245233	bHLH
PaF106G0400015902.01	MDP0000245233	bHLH
PaF106G0400015972.01	ppa008301m	NAC
PaF106G0400015974.01	MDP0000265619	Nin-like
PaF106G0400015976.01	Lus10009218	C2H2
PaF106G0400016008.01	Thecc1EG029886t1	HSF
PaF106G0400016043.01	PH01000284G1150	HB-other
PaF106G0400016052.01	MDP0000242456	B3
PaF106G0400016074.01	ppa022739m	SBP
PaF106G0400016109.01	mrna32207.1-v1.0-hybrid	TALE
PaF106G0400016118.01	Pbr038274.1	bHLH
PaF106G0400016135.01	Pbr038274.1	bHLH
PaF106G0400016137.01	Pbr038274.1	bHLH
PaF106G0400016192.01	Lus10038670	NAC
PaF106G0400016230.01	mrna19889.1-v1.0-hybrid	C3H
PaF106G0400016282.01	Lus10009218	C2H2
PaF106G0400016319.01	Jcr4S02193.10	NF-YB
PaF106G0400016330.01	mrna19889.1-v1.0-hybrid	C3H
PaF106G0400016336.01	MDP0000289260	BES1
PaF106G0400016376.01	mrna32207.1-v1.0-hybrid	TALE
PaF106G0400016382.01	MDP0000305438	MYB_related
PaF106G0400016408.01	Bra001729	B3
PaF106G0400016431.01	Bradi2g44117.1	bHLH
PaF106G0400016458.01	Bra001729	B3
PaF106G0400016513.01	C.cajan_44612	S1Fa-like
PaF106G0400016522.01	MDP0000311595	NF-YA
PaF106G0400016527.01	MDP0000311595	NF-YA
PaF106G0400016532.01	MDP0000311595	NF-YA
PaF106G0400016551.01	mrna32207.1-v1.0-hybrid	TALE
PaF106G0400016558.01	mrna09125.1-v1.0-hybrid	bHLH
PaF106G0400016566.01	Scf00343.g15875.t1	ARF
PaF106G0400016578.01	Scf00343.g15875.t1	ARF
PaF106G0400016584.01	Scf00343.g15875.t1	ARF
PaF106G0400016586.01	Scf00343.g15875.t1	ARF
PaF106G0400016595.01	Scf00343.g15875.t1	ARF
PaF106G0400016598.01	Scf00343.g15875.t1	ARF
PaF106G0400016611.01	mrna32207.1-v1.0-hybrid	TALE
PaF106G0400016632.01	27791.m000083	NF-X1
PaF106G0400016638.01	mrna32207.1-v1.0-hybrid	TALE
PaF106G0400016645.01	ppa026315m	MYB
PaF106G0400016677.01	mrna32207.1-v1.0-hybrid	TALE
PaF106G0400016680.01	mrna32207.1-v1.0-hybrid	TALE
PaF106G0400016726.01	mrna19889.1-v1.0-hybrid	C3H
PaF106G0400016777.01	PDK_30s1044831g002	G2-like
PaF106G0400016816.01	MDP0000245233	bHLH
PaF106G0400016817.01	MDP0000245233	bHLH
PaF106G0400016831.01	Scf00063.g6386.t1	GeBP
PaF106G0400016848.01	mrna19889.1-v1.0-hybrid	C3H
PaF106G0400016870.01	Can011627	B3
PaF106G0400016906.01	GSVIVT01032785001	ERF
PaF106G0400016908.01	mrna19889.1-v1.0-hybrid	C3H
PaF106G0400016911.01	mrna19889.1-v1.0-hybrid	C3H
PaF106G0400016951.01	Gorai.008G128900.1	G2-like
PaF106G0400017037.01	ppa021227m	Trihelix
PaF106G0400017065.01	mrna32207.1-v1.0-hybrid	TALE
PaF106G0400017172.01	EMT07921	FAR1
PaF106G0400017421.01	C.cajan_44612	S1Fa-like
PaF106G0400017487.01	EMT28879	ERF
PaF106G0400017490.01	EMT28879	ERF
PaF106G0400017491.01	EMT28879	ERF
PaF106G0400017495.01	mrna32207.1-v1.0-hybrid	TALE
PaF106G0400017605.01	Lus10043264	YABBY
PaF106G0400017681.01	ppb024383m	TCP
PaF106G0400017686.01	mrna09106.1-v1.0-hybrid	C2H2
PaF106G0400017690.01	mrna09106.1-v1.0-hybrid	C2H2
PaF106G0400017701.01	ppa019841m	WOX
PaF106G0400017862.01	GSMUA_Achr1P00070_001	ERF
PaF106G0400017974.01	mrna32207.1-v1.0-hybrid	TALE
PaF106G0400017975.01	mrna32207.1-v1.0-hybrid	TALE
PaF106G0400017978.01	mrna32207.1-v1.0-hybrid	TALE
PaF106G0400017984.01	mrna32207.1-v1.0-hybrid	TALE
PaF106G0400017987.01	mrna32207.1-v1.0-hybrid	TALE
PaF106G0400018009.01	Neem_16119_f_2	bHLH
PaF106G0400018013.01	mrna32207.1-v1.0-hybrid	TALE
PaF106G0400018019.01	MDP0000685403	B3
PaF106G0400018149.01	EMS59827	ERF
PaF106G0400018193.01	Bra001729	B3
PaF106G0400018270.01	mrna20108.1-v1.0-hybrid	NF-YB
PaF106G0500018502.01	EMS54836	ERF
PaF106G0500018586.01	Pbr015419.1	C3H
PaF106G0500018589.01	Pbr015419.1	C3H
PaF106G0500018593.01	Pbr015419.1	C3H
PaF106G0500018678.01	Scf00343.g15875.t1	ARF
PaF106G0500018679.01	Scf00343.g15875.t1	ARF
PaF106G0500018681.01	Scf00343.g15875.t1	ARF
PaF106G0500018795.01	OpuncBB_FGP24418	bZIP
PaF106G0500018850.01	MDP0000296303	bZIP
PaF106G0500018861.01	mrna09125.1-v1.0-hybrid	bHLH
PaF106G0500018894.01	PH01000508G0070	MYB_related
PaF106G0500018896.01	MDP0000265073	NAC
PaF106G0500018981.01	mrna09125.1-v1.0-hybrid	bHLH
PaF106G0500019002.01	MDP0000312598	B3
PaF106G0500019069.01	OpuncBB_FGP28174	bZIP
PaF106G0500019070.01	GSVIVT01032746001	ERF
PaF106G0500019095.01	GSVIVT01015183001	HSF
PaF106G0500019108.01	GSVIVT01032746001	ERF
PaF106G0500019145.01	mrna21370.1-v1.0-hybrid	WRKY
PaF106G0500019181.01	Lus10015266	B3
PaF106G0500019192.01	Pbr015419.1	C3H
PaF106G0500019337.01	C.cajan_40518	Trihelix
PaF106G0500019342.01	C.cajan_40518	Trihelix
PaF106G0500019348.01	C.cajan_40518	Trihelix
PaF106G0500019363.01	Potri.T074200.1	NAC
PaF106G0500019379.01	ppa011209m	YABBY
PaF106G0500019567.01	PK03054.1	HD-ZIP
PaF106G0500019643.01	MDP0000191614	NAC
PaF106G0500019669.01	Pbr029880.1	NF-YB
PaF106G0500019697.01	ppa002762m	bHLH
PaF106G0500019952.01	OpuncBB_FGP24418	bZIP
PaF106G0500020009.01	Pbr035120.1	WRKY
PaF106G0500020082.01	OpuncBB_FGP24461	G2-like
PaF106G0500020134.01	Scf00097.g8337.t1	bZIP
PaF106G0500020276.01	Lus10019354	B3
PaF106G0500020293.01	ObartAA03S_FGP14057	G2-like
PaF106G0500020327.01	Glyma04g34912.1	bHLH
PaF106G0500020331.01	LOC_Os12g06010.1	bZIP
PaF106G0500020339.01	ppa019986m	C3H
PaF106G0500020427.01	Bra013842	GeBP
PaF106G0500020431.01	Bra013842	GeBP
PaF106G0500020435.01	Bra013842	GeBP
PaF106G0500020561.01	ppa020940m	bHLH
PaF106G0500020568.01	311885	bZIP
PaF106G0500020667.01	mrna27137.1-v1.0-hybrid	STAT
PaF106G0500020680.01	GSMUA_Achr7P08840_001	HD-ZIP
PaF106G0500020797.01	ppa023143m	MYB
PaF106G0500020819.01	Lus10019058	ARR-B
PaF106G0500020850.01	MDP0000288670	bHLH
PaF106G0500021040.01	C.cajan_44612	S1Fa-like
PaF106G0500021056.01	ppa015026m	TCP
PaF106G0500021088.01	Thecc1EG000515t1	B3
PaF106G0500021134.01	ObartAA03S_FGP15120	C3H
PaF106G0500021185.01	EMT20798	MYB_related
PaF106G0500021188.01	EMT20798	MYB_related
PaF106G0500021223.01	ppa017419m	WOX
PaF106G0500021260.01	27791.m000083	NF-X1
PaF106G0500021274.01	GRMZM2G351232_P01	E2F/DP
PaF106G0500021285.01	ppa011508m	ZF-HD
PaF106G0600021559.01	Bra039779	S1Fa-like
PaF106G0600021563.01	mrna09125.1-v1.0-hybrid	bHLH
PaF106G0600021566.01	mrna09125.1-v1.0-hybrid	bHLH
PaF106G0600021580.01	Lus10009218	C2H2
PaF106G0600021600.01	Bra039779	S1Fa-like
PaF106G0600021617.01	Bra032634	C3H
PaF106G0600021620.01	mrna18483.1-v1.0-hybrid	M-type
PaF106G0600021666.01	OpuncBB_FGP24418	bZIP
PaF106G0600021693.01	PK03054.1	HD-ZIP
PaF106G0600021781.01	GRMZM2G462417_P01	ZF-HD
PaF106G0600021834.01	BGIOSGA035841-PA	MYB_related
PaF106G0600021860.01	MDP0000262878	MYB_related
PaF106G0600021946.01	Pp1s76_147V6.1	CO-like
PaF106G0600021982.01	GSMUA_Achr5P10740_001	LBD
PaF106G0600022022.01	AT4G12020.2	WRKY
PaF106G0600022118.01	mrna07861.1-v1.0-hybrid	B3
PaF106G0600022158.01	PH01002606G0040	HSF
PaF106G0600022161.01	PH01002606G0040	HSF
PaF106G0600022172.01	OpuncBB_FGP24461	G2-like
PaF106G0600022188.01	MDP0000247912	bHLH
PaF106G0600022272.01	mrna16523.1-v1.0-hybrid	CPP
PaF106G0600022361.01	Potri.T074200.1	NAC
PaF106G0600022412.01	Lsa000376	Dof
PaF106G0600022413.01	Lsa000376	Dof
PaF106G0600022423.01	ppa019793m	WOX
PaF106G0600022445.01	AT1G64100.2	NAC
PaF106G0600022481.01	AT1G64100.2	NAC
PaF106G0600022540.01	29656.m000483	NF-YC
PaF106G0600022803.01	BGIOSGA030830-PA	MYB
PaF106G0600022843.01	ppa008070m	M-type
PaF106G0600022847.01	ppa008070m	M-type
PaF106G0600022891.01	Bra039779	S1Fa-like
PaF106G0600022958.01	Glyma12g30975.1	bZIP
PaF106G0600023074.01	MDP0000247912	bHLH
PaF106G0600023075.01	MDP0000247912	bHLH
PaF106G0600023099.01	mrna28785.1-v1.0-hybrid	bHLH
PaF106G0600023102.01	mrna09125.1-v1.0-hybrid	bHLH
PaF106G0600023103.01	mrna09125.1-v1.0-hybrid	bHLH
PaF106G0600023187.01	LOC_Os11g04360.1	NAC
PaF106G0600023222.01	MDP0000191614	NAC
PaF106G0600023237.01	EMT03342	WRKY
PaF106G0600023306.01	Scf00063.g6386.t1	GeBP
PaF106G0600023320.01	ppa021410m	bHLH
PaF106G0600023421.01	mrna27137.1-v1.0-hybrid	STAT
PaF106G0600023441.01	Bra039779	S1Fa-like
PaF106G0600023488.01	Bra039779	S1Fa-like
PaF106G0600023537.01	30078.m002303	MYB_related
PaF106G0600023832.01	MDP0000254227	ERF
PaF106G0600023887.01	Jcr4S00541.20	NF-YB
PaF106G0600023944.01	mrna27595.1-v1.0-hybrid	B3
PaF106G0600023946.01	mrna27595.1-v1.0-hybrid	B3
PaF106G0600023960.01	mrna27595.1-v1.0-hybrid	B3
PaF106G0600023985.01	Pbr031344.1	C2H2
PaF106G0600023999.01	PK03054.1	HD-ZIP
PaF106G0600024001.01	PH01002606G0040	HSF
PaF106G0600024068.01	ppa007656m	bHLH
PaF106G0600024083.01	PH01002606G0040	HSF
PaF106G0600024109.01	ppa009614m	HD-ZIP
PaF106G0600024147.01	ppa003017m	GRF
PaF106G0600024149.01	ppa011366m	bZIP
PaF106G0600024201.01	Pbr002083.1	ERF
PaF106G0600024203.01	BGIOSGA035841-PA	MYB_related
PaF106G0600024254.01	Thecc1EG000515t1	B3
PaF106G0600024288.01	MDP0000296303	bZIP
PaF106G0600024398.01	Tp5g09000	NF-YB
PaF106G0600024407.01	PH01001490G0340	MYB_related
PaF106G0600024409.01	ppa005230m	AP2
PaF106G0600024411.01	cassava4.1_011476m	MYB_related
PaF106G0600024417.01	MEDTR3G005900.1	M-type
PaF106G0600024431.01	e_gw1.1.548.1	ARR-B
PaF106G0600024494.01	C.cajan_44612	S1Fa-like
PaF106G0600024498.01	mrna19889.1-v1.0-hybrid	C3H
PaF106G0600024501.01	C.cajan_44612	S1Fa-like
PaF106G0600024535.01	Aan019826	CO-like
PaF106G0600024625.01	NNU_007607-RA	C2H2
PaF106G0600024632.01	Bra039779	S1Fa-like
PaF106G0600024634.01	Bra039779	S1Fa-like
PaF106G0600024645.01	mrna28785.1-v1.0-hybrid	bHLH
PaF106G0600024659.01	EMT05641	FAR1
PaF106G0600024672.01	mrna00620.1-v1.0-hybrid	BBR-BPC
PaF106G0600024743.01	MDP0000294614	NAC
PaF106G0600024749.01	GSMUA_Achr10P22520_001	TALE
PaF106G0600024841.01	ObartAA03S_FGP19488	MYB
PaF106G0600024874.01	OpuncBB_FGP22587	MYB_related
PaF106G0600024883.01	AC202489_11.1	WRKY
PaF106G0600024884.01	AC202489_11.1	WRKY
PaF106G0600024896.01	Bra039779	S1Fa-like
PaF106G0600024916.01	ppa022996m	ERF
PaF106G0600024979.01	Pbr002958.1	LBD
PaF106G0600025012.01	MDP0000262878	MYB_related
PaF106G0600025015.01	MDP0000262878	MYB_related
PaF106G0600025140.01	PDK_30s65509686g001	TALE
PaF106G0600025205.01	ppa002978m	bHLH
PaF106G0600025258.01	ObartAA03S_FGP31756	NAC
PaF106G0600025260.01	PK03054.1	HD-ZIP
PaF106G0600025315.01	cassava4.1_003940m	C2H2
PaF106G0600025336.01	Scf00724.g21165.t1	HD-ZIP
PaF106G0600025342.01	MDP0000320566	NAC
PaF106G0600025380.01	Tp3g07810	MYB_related
PaF106G0600025398.01	Lus10031505	NF-YA
PaF106G0600025477.01	Thecc1EG000070t1	Nin-like
PaF106G0600025594.01	ppa020569m	CPP
PaF106G0600025621.01	ppa005585m	bZIP
PaF106G0600025634.01	ObartAA03S_FGP4185	SRS
PaF106G0600025754.01	mrna24941.1-v1.0-hybrid	DBB
PaF106G0700026042.01	mrna09125.1-v1.0-hybrid	bHLH
PaF106G0700026044.01	MDP0000314088	G2-like
PaF106G0700026355.01	MDP0000264827	bHLH
PaF106G0700026433.01	Lus10023829	bHLH
PaF106G0700026511.01	C.cajan_44612	S1Fa-like
PaF106G0700026639.01	Thecc1EG029045t1	C2H2
PaF106G0700026733.01	ppa015791m	GRF
PaF106G0700026834.01	MDP0000320566	NAC
PaF106G0700026835.01	MDP0000320566	NAC
PaF106G0700026837.01	MDP0000320566	NAC
PaF106G0700026911.01	Jcr4S00206.70	FAR1
PaF106G0700026926.01	Lus10038670	NAC
PaF106G0700027011.01	Thecc1EG011369t1	FAR1
PaF106G0700027016.01	ObartAA03S_FGP14057	G2-like
PaF106G0700027029.01	901333	B3
PaF106G0700027064.01	MDP0000449389	M-type
PaF106G0700027134.01	GRMZM5G899865_P01	bHLH
PaF106G0700027221.01	EMT20798	MYB_related
PaF106G0700027288.01	Pbr010427.1	E2F/DP
PaF106G0700027385.01	ppa009270m	B3
PaF106G0700027388.01	ppa005086m	B3
PaF106G0700027390.01	ppa025633m	B3
PaF106G0700027391.01	ppa022219m	B3
PaF106G0700027434.01	Bra032430	LBD
PaF106G0700027474.01	MDP0000281804	LBD
PaF106G0700027475.01	MDP0000281804	LBD
PaF106G0700027477.01	Pbr035120.1	WRKY
PaF106G0700027481.01	MDP0000281804	LBD
PaF106G0700027562.01	MDP0000294614	NAC
PaF106G0700027580.01	ObartAA03S_FGP14057	G2-like
PaF106G0700027591.01	ObartAA03S_FGP14057	G2-like
PaF106G0700027595.01	Thecc1EG000515t1	B3
PaF106G0700027621.01	Pbr029332.1	WRKY
PaF106G0700027756.01	ppa006912m	GRF
PaF106G0700027781.01	PDK_30s873781g005	C3H
PaF106G0700027799.01	MDP0000231542	bZIP
PaF106G0700027837.01	Tp3g07810	MYB_related
PaF106G0700027849.01	Tp3g07810	MYB_related
PaF106G0700027867.01	MDP0000515760	C2H2
PaF106G0700027870.01	Jcr4S00282.90	NAC
PaF106G0700027901.01	Bra001729	B3
PaF106G0700027938.01	mrna12442.1-v1.0-hybrid	NAC
PaF106G0700027940.01	mrna12442.1-v1.0-hybrid	NAC
PaF106G0700027943.01	MDP0000247912	bHLH
PaF106G0700028053.01	MDP0000265619	Nin-like
PaF106G0700028062.01	Ahy018875	MYB_related
PaF106G0700028092.01	Ahy018875	MYB_related
PaF106G0700028161.01	MDP0000449389	M-type
PaF106G0700028169.01	EMT19245	FAR1
PaF106G0700028239.01	AT1G64100.2	NAC
PaF106G0700028249.01	EuGene.0900010205	C3H
PaF106G0700028275.01	MEDTR3G005900.1	M-type
PaF106G0700028351.01	PK14939.1	MYB_related
PaF106G0700028364.01	Potri.T074200.1	NAC
PaF106G0700028365.01	Lus10019708	NF-YA
PaF106G0700028366.01	Potri.T074200.1	NAC
PaF106G0700028369.01	Potri.T074200.1	NAC
PaF106G0700028373.01	AT5G45260.1	WRKY
PaF106G0700028384.01	ppa009186m	B3
PaF106G0700028399.01	C.cajan_44612	S1Fa-like
PaF106G0700028401.01	MEDTR3G005900.1	M-type
PaF106G0700028405.01	MEDTR3G005900.1	M-type
PaF106G0700028406.01	MEDTR3G005900.1	M-type
PaF106G0700028478.01	Lus10040166	GRAS
PaF106G0700028608.01	ppa025156m	B3
PaF106G0700028629.01	AT4G12020.3	WRKY
PaF106G0700028640.01	MDP0000515760	C2H2
PaF106G0700028684.01	ppa016095m	bHLH
PaF106G0700028785.01	XP_004490268	GeBP
PaF106G0700028794.01	mrna24179.1-v1.0-hybrid	NAC
PaF106G0700028836.01	Scf00343.g15875.t1	ARF
PaF106G0700028861.01	GSMUA_Achr9P10530_001	LBD
PaF106G0700029062.01	ppa023023m	Dof
PaF106G0700029172.01	Aan020124	MYB
PaF106G0700029240.01	ppa018041m	GeBP
PaF106G0800029287.01	Lus10025533	B3
PaF106G0800029457.01	EMS58638	CAMTA
PaF106G0800029463.01	27791.m000083	NF-X1
PaF106G0800029503.01	MDP0000266051	B3
PaF106G0800029787.01	Thecc1EG000515t1	B3
PaF106G0800029789.01	Gorai.005G226700.1	C2H2
PaF106G0800029792.01	Gorai.005G226700.1	C2H2
PaF106G0800029819.01	Gorai.005G226700.1	C2H2
PaF106G0800029849.01	Bra001729	B3
PaF106G0800029853.01	ppa000476m	MYB_related
PaF106G0800029902.01	ppa009628m	NAC
PaF106G0800029962.01	MDP0000285150	G2-like
PaF106G0800029993.01	PH01003957G0030	E2F/DP
PaF106G0800029996.01	PH01003957G0030	E2F/DP
PaF106G0800030033.01	Can007368	ERF
PaF106G0800030069.01	evm.model.supercontig_104.9	NF-YA
PaF106G0800030124.01	mrna01596.1-v1.0-hybrid	WRKY
PaF106G0800030157.01	Lus10007348	MYB_related
PaF106G0800030158.01	Lus10007348	MYB_related
PaF106G0800030239.01	ObartAA03S_FGP18838	NAC
PaF106G0800030242.01	ObartAA03S_FGP18838	NAC
PaF106G0800030312.01	mrna12906.1-v1.0-hybrid	FAR1
PaF106G0800030327.01	PH01002606G0040	HSF
PaF106G0800030354.01	Lus10025533	B3
PaF106G0800030401.01	Potri.T074200.1	NAC
PaF106G0800030402.01	Bra017929	C3H
PaF106G0800030406.01	Lus10019708	NF-YA
PaF106G0800030409.01	Potri.T074200.1	NAC
PaF106G0800030449.01	Potri.T074200.1	NAC
PaF106G0800030456.01	Potri.T074200.1	NAC
PaF106G0800030461.01	Lus10019708	NF-YA
PaF106G0800030462.01	AT4G12020.3	WRKY
PaF106G0800030463.01	Bra009950	MYB_related
PaF106G0800030480.01	ObartAA03S_FGP31756	NAC
PaF106G0800030484.01	ppa009455m	NAC
PaF106G0800030499.01	Potri.T074200.1	NAC
PaF106G0800030619.01	OpuncBB_FGP22587	MYB_related
PaF106G0800030644.01	GSMUA_Achr10P17130_001	bHLH
PaF106G0800030767.01	PH01002606G0040	HSF
PaF106G0800030782.01	OpuncBB_FGP22587	MYB_related
PaF106G0800030789.01	312791	bHLH
PaF106G0800030791.01	Tae001589	MYB_related
PaF106G0800030809.01	MA_11351g0010	WRKY
PaF106G0800030813.01	MA_11351g0010	WRKY
PaF106G0800030915.01	Can011627	B3
PaF106G0800030952.01	PH01002606G0040	HSF
PaF106G0800030984.01	MDP0000222377	G2-like
PaF106G0800030995.01	Scf00126.g9742.t1	LBD
PaF106G0800031001.01	Jcr4S02193.10	NF-YB
PaF106G0800031008.01	PH01002606G0040	HSF
PaF106G0800031015.01	PH01002606G0040	HSF
PaF106G0800031023.01	PH01002606G0040	HSF
PaF106G0800031024.01	PH01002606G0040	HSF
PaF106G0800031052.01	Bra030622	bHLH
PaF106G0800031067.01	NNU_016191-RA	SBP
PaF106G0800031088.01	MDP0000303528	CPP
PaF106G0800031110.01	Pbr015419.1	C3H
PaF106G0800031130.01	MDP0000464809	GRAS
PaF106G0800031136.01	BGIOSGA034756-PA	NAC
PaF106G0800031137.01	MDP0000464809	GRAS
PaF106G0800031206.01	Eucgr.H02157.1	MYB_related
PaF106G0800031238.01	Bra001729	B3
PaF106G0800031239.01	Bra001729	B3
PaF106G0800031245.01	GSMUA_Achr8P18260_001	RAV
PaF106G0800031246.01	GSMUA_Achr8P18260_001	RAV
PaF106G0800031260.01	Potri.T074200.1	NAC
PaF106G0800031261.01	Potri.T074200.1	NAC
PaF106G0800031262.01	Eucgr.H02157.1	MYB_related
PaF106G0800031286.01	EMS53359	WRKY
PaF106G0800031288.01	Potri.T074200.1	NAC
PaF106G0800031436.01	ppa014060m	MYB_related
PaF106G0800031494.01	Lsa000376	Dof
PaF106G0800031512.01	PDK_30s873781g005	C3H
PaF106G0800031588.01	GRMZM5G899865_P01	bHLH
PaF106G0800031596.01	GRMZM5G899865_P01	bHLH
PaF106G0800031599.01	GRMZM5G899865_P01	bHLH
PaF106G0800031601.01	EMT26167	WRKY
PaF106G0800031608.01	GRMZM5G899865_P01	bHLH
PaF106G0800031698.01	chr6.CM0055.400.r2.m	MIKC
PaF106G0800031731.01	OpuncBB_FGP3986	HD-ZIP
PaF106G0800031748.01	ppa023830m	GATA
PaF106G0800031767.01	Thecc1EG000070t1	Nin-like
PaF106G0800031799.01	Bra001729	B3
PaF106G0800031807.01	Bra001729	B3
PaF106G0800031809.01	Bra001729	B3
PaF106G0800031812.01	Bra001729	B3
PaF106G0800031872.01	Bra013812	MIKC
PaF106G0800031890.01	Thecc1EG000070t1	Nin-like
PaF106G0800031962.01	Aan020124	MYB
PaF106G0800031976.01	27791.m000083	NF-X1
PaF106G0800032004.01	27791.m000083	NF-X1
PaF106G0800032083.01	Gorai.001G003200.1	S1Fa-like
PaF106G0800032134.01	AC202489_11.1	WRKY
PaF106G0800032137.01	AC202489_11.1	WRKY
PaF106G0800032154.01	Potri.T074200.1	NAC
PaF106G0800032198.01	Jcr4S02193.10	NF-YB
PaF106G0800032199.01	ObartAA03S_FGP4185	SRS
PaF106G0800032221.01	Jcr4S02193.10	NF-YB
PaF106G0800032310.01	Potri.T074200.1	NAC
PaF106G0800032313.01	Potri.T074200.1	NAC
PaF106G0800032319.01	Potri.T074200.1	NAC
PaF106G0800032329.01	MDP0000287465	HRT-like
PaF106G0800032353.01	EMS59548	C2H2
PaF106G0800032368.01	Potri.T074200.1	NAC
PaF106G0800032374.01	Potri.T074200.1	NAC
PaF106G0800032447.01	Potri.T074200.1	NAC
PaF106G0800032449.01	Potri.T074200.1	NAC
PaF106G0800032454.01	Potri.T074200.1	NAC
PaF106G0800032458.01	Potri.T074200.1	NAC
PaF106G0800032487.01	Potri.T074200.1	NAC
PaF106G0800032547.01	Potri.T074200.1	NAC
PaF106G0800032548.01	Potri.T074200.1	NAC
PaF106G0800032549.01	Potri.T074200.1	NAC
PaF106G0800032560.01	Neem_7649_f_2	HSF
PaF106G0800032573.01	Jcr4S00223.20	bHLH
PaF106G0800032576.01	Jcr4S00223.20	bHLH
PaF106G0800032587.01	Ahy018875	MYB_related
PaF106G0800032588.01	Potri.T074200.1	NAC
PaF106G0800032607.01	Potri.T074200.1	NAC
PaF106G0800032608.01	mrna21370.1-v1.0-hybrid	WRKY
PaF106G0800032611.01	MDP0000198333	bHLH
PaF106G0800032614.01	MDP0000265619	Nin-like
PaF106G0800032615.01	ppa008850m	Dof
PaF106G0800032639.01	Potri.T074200.1	NAC
PaF106G0800032650.01	Potri.T074200.1	NAC
PaF106G0800032651.01	Potri.T074200.1	NAC
PaF106G0800032652.01	Potri.T074200.1	NAC
PaF106G0800032661.01	Potri.T074200.1	NAC
PaF106G0800032688.01	GRMZM2G317287_P01	GRAS
PaF106G0800032762.01	MEDTR3G005900.1	M-type
PaF106G0800032778.01	mrna27595.1-v1.0-hybrid	B3
PaF106G0800032790.01	mrna27595.1-v1.0-hybrid	B3
PaF106G0800032802.01	EMT20798	MYB_related
PaF106G0800032869.01	Lus10030581	bHLH
PaF106G0800032875.01	Potri.T074200.1	NAC
PaF106G0800032888.01	MDP0000464809	GRAS
Prunus_sibirica_newGene_1030	PK03054.1	HD-ZIP
Prunus_sibirica_newGene_1160	LOC_Os12g06010.1	bZIP
Prunus_sibirica_newGene_1180	ppa002978m	bHLH
Prunus_sibirica_newGene_1238	Jcr4S16185.10	NAC
Prunus_sibirica_newGene_1245	Jcr4S16185.10	NAC
Prunus_sibirica_newGene_1332	orange1.1g046720m	FAR1
Prunus_sibirica_newGene_1338	Potri.T074200.1	NAC
Prunus_sibirica_newGene_1378	Tp3g07810	MYB_related
Prunus_sibirica_newGene_1385	PK03054.1	HD-ZIP
Prunus_sibirica_newGene_1402	ppa001455m	C2H2
Prunus_sibirica_newGene_1525	LOC_Os12g06010.1	bZIP
Prunus_sibirica_newGene_1528	mrna15055.1-v1.0-hybrid	G2-like
Prunus_sibirica_newGene_1558	Scf00063.g6386.t1	GeBP
Prunus_sibirica_newGene_1590	PK03054.1	HD-ZIP
Prunus_sibirica_newGene_1679	MELO3C019736P1	bHLH
Prunus_sibirica_newGene_173	MDP0000173550	MYB
Prunus_sibirica_newGene_175	LOC_Os12g06010.1	bZIP
Prunus_sibirica_newGene_1780	MDP0000265619	Nin-like
Prunus_sibirica_newGene_1788	ppb024794m	C2H2
Prunus_sibirica_newGene_1860	ppa015007m	C2H2
Prunus_sibirica_newGene_1866	Jcr4S05030.40	MYB
Prunus_sibirica_newGene_1871	Jcr4S00018.10	MIKC
Prunus_sibirica_newGene_1925	LOC_Os12g06010.1	bZIP
Prunus_sibirica_newGene_1975	MDP0000180046	NAC
Prunus_sibirica_newGene_2024	LOC_Os12g06010.1	bZIP
Prunus_sibirica_newGene_2042	PDK_30s1160841g001	ARF
Prunus_sibirica_newGene_2093	MDP0000285251	C3H
Prunus_sibirica_newGene_2274	ppa000204m	C2H2
Prunus_sibirica_newGene_265	Jcr4S16185.10	NAC
Prunus_sibirica_newGene_267	mrna32207.1-v1.0-hybrid	TALE
Prunus_sibirica_newGene_317	mrna32207.1-v1.0-hybrid	TALE
Prunus_sibirica_newGene_343	ppa002978m	bHLH
Prunus_sibirica_newGene_383	MDP0000173550	MYB
Prunus_sibirica_newGene_398	LOC_Os12g06010.1	bZIP
Prunus_sibirica_newGene_462	PK03054.1	HD-ZIP
Prunus_sibirica_newGene_701	OpuncBB_FGP24418	bZIP
Prunus_sibirica_newGene_743	MDP0000254227	ERF
Prunus_sibirica_newGene_813	Pbr031076.1	FAR1
Prunus_sibirica_newGene_862	Jcr4S05030.40	MYB
Prunus_sibirica_newGene_893	AT1G64100.2	NAC
Prunus_sibirica_newGene_915	MDP0000132226	M-type
Prunus_sibirica_newGene_94	MDP0000173550	MYB
