# Supplementary material for: Mining for genes related to pistil abortion in Prunus sibirica L
Source: PeerJ. 2022 Nov 15;10:e14366. doi: 10.7717/peerj.14366 (PMC9673769; doi:10.7717/peerj.14366)
Supplement: Table S18 [file peerj-10-14366-s018.xlsx]

## Sheet: Sheet1
Table S18 DEGs related to starch and sucrose metabolism
#ID	NPt1_Count	NPt2_Count	NPt3_Count	APt1_Count	APt2_Count	APt3_Count	NPt1_FPKM	NPt2_FPKM	NPt3_FPKM	APt1_FPKM	APt2_FPKM	APt3_FPKM	FDR	log2FC	regulated	COG_class	COG_class_annotation	GO_annotation	KEGG_annotation	KEGG_annotation	KEGG_pathway_annotation	KOG_class	KOG_class_annotation	Pfam_annotation	Swiss-Prot_annotation	eggNOG_class	eggNOG_class_annotation	NR_annotation
PaF106G0500019363.01	1314	1308	1162	57	33	35	8.27301	9.85745	7.54482	0.388889	0.24052	0.216303	1.37173e-134	-4.49668	down	[R]	General function prediction only	Biological Process: signal transduction (GO:0007165);; Molecular Function: ADP binding (GO:0043531);;	K00695|8.0e-168|mtr:MTR_6g478030|K00695 sucrose synthase [EC:2.4.1.13] | (RefSeq) sucrose synthase	K00695 | 8.0e-168 | mtr:mtr 6g478030 | K00695蔗糖合酶[EC:2.4.1.13]|（参考顺序）蔗糖合酶	Starch and sucrose metabolism (ko00500)	--	--	TIR domain	Disease resistance protein RPV1 OS=Vitis rotundifolia OX=103349 GN=RPV1 PE=1 SV=1	T	Signal transduction mechanisms	PREDICTED: TMV resistance protein N-like isoform X1 [Prunus mume]
PaF106G0200007569.01	3924	4653	5091	260	149	260	11.6656	16.5562	15.6602	0.836246	0.513011	0.770295	3.97192e-146	-4.07214	down	--	--	Biological Process: signal transduction (GO:0007165);; Molecular Function: ADP binding (GO:0043531);;	K00695|2.6e-155|mtr:MTR_6g478030|K00695 sucrose synthase [EC:2.4.1.13] | (RefSeq) sucrose synthase	K00695 | 2.6e-155 | mtr:mtr 6g478030 | K00695蔗糖合酶[EC:2.4.1.13]|（参考顺序）蔗糖合酶	Starch and sucrose metabolism (ko00500)	--	--	TIR domain	TMV resistance protein N OS=Nicotiana glutinosa OX=35889 GN=N PE=1 SV=1	T	Signal transduction mechanisms	PREDICTED: TMV resistance [Prunus dulcis]
PaF106G0800031260.01	109	62	92	0	0	0	0.641487	0.432686	0.558301	0	0	0	4.73182e-23	-3.54899	down	--	--	Biological Process: signal transduction (GO:0007165);; Molecular Function: ADP binding (GO:0043531);;	K00695|1.1e-162|mtr:MTR_6g478030|K00695 sucrose synthase [EC:2.4.1.13] | (RefSeq) sucrose synthase	K00695 | 1.1e-162 | mtr:mtr 6g478030 | K00695蔗糖合酶[EC:2.4.1.13]|（参考顺序）蔗糖合酶	Starch and sucrose metabolism (ko00500)	--	--	TIR domain	TMV resistance protein N OS=Nicotiana glutinosa OX=35889 GN=N PE=1 SV=1	T	Signal transduction mechanisms	TMV resistance protein N [Prunus persica]
PaF106G0800032449.01	250	210	223	16	28	27	1.50292	1.51563	1.38403	0.103621	0.196662	0.158356	1.16579e-28	-2.75583	down	[R]	General function prediction only	Biological Process: signal transduction (GO:0007165);; Molecular Function: ADP binding (GO:0043531);;	K00695|3.6e-129|mtr:MTR_6g478030|K00695 sucrose synthase [EC:2.4.1.13] | (RefSeq) sucrose synthase	K00695 | 3.6e-129 | mtr:mtr 6g478030 | K00695蔗糖合酶[EC:2.4.1.13]|（参考顺序）蔗糖合酶	Starch and sucrose metabolism (ko00500)	--	--	TIR domain	Disease resistance protein Roq1 OS=Nicotiana benthamiana OX=4100 GN=ROQ1 PE=1 SV=1	S	Function unknown	PREDICTED: TMV resistance protein N-like [Prunus mume]
PaF106G0800032458.01	478	485	529	61	49	76	2.95463	3.3233	2.98875	0.343122	0.294646	0.394482	8.9443e-50	-2.73044	down	--	--	Biological Process: signal transduction (GO:0007165);; Molecular Function: ADP binding (GO:0043531);;	K00695|2.1e-110|mtr:MTR_6g478030|K00695 sucrose synthase [EC:2.4.1.13] | (RefSeq) sucrose synthase	K00695 | 2.1e-110 | mtr:mtr 6g478030 | K00695蔗糖合酶[EC:2.4.1.13]|（参考顺序）蔗糖合酶	Starch and sucrose metabolism (ko00500)	--	--	TIR domain	Disease resistance protein Roq1 OS=Nicotiana benthamiana OX=4100 GN=ROQ1 PE=1 SV=1	S	Function unknown	PREDICTED: TMV resistance protein N-like [Prunus mume]
PaF106G0800032650.01	165	187	170	20	28	40	1.02453	1.38963	1.08993	0.131883	0.200738	0.243386	2.07463e-15	-2.12484	down	[R]	General function prediction only	Biological Process: signal transduction (GO:0007165);; Molecular Function: ADP binding (GO:0043531);;	K00695|1.7e-117|mtr:MTR_6g478030|K00695 sucrose synthase [EC:2.4.1.13] | (RefSeq) sucrose synthase	K00695 | 1.7e-117 | mtr:mtr 6g478030 | K00695蔗糖合酶[EC:2.4.1.13]|（参考顺序）蔗糖合酶	Starch and sucrose metabolism (ko00500)	--	--	TIR domain	TMV resistance protein N OS=Nicotiana glutinosa OX=35889 GN=N PE=1 SV=1	S	Function unknown	PREDICTED: TMV resistance protein N-like [Prunus mume]
PaF106G0200007609.01	588	646	717	123	163	124	9.48008	12.4611	11.9273	2.14582	3.06395	2.00167	6.17014e-27	-2.01099	down	--	--	Biological Process: signal transduction (GO:0007165);; Molecular Function: ADP binding (GO:0043531);;	K00695|2.9e-25|mtr:MTR_6g478030|K00695 sucrose synthase [EC:2.4.1.13] | (RefSeq) sucrose synthase	K00695 | 2.9e-25 | mtr:mtr 6g478030 | K00695蔗糖合酶[EC:2.4.1.13]|（参考顺序）蔗糖合酶	Starch and sucrose metabolism (ko00500)	--	--	NB-ARC domain	Disease resistance protein Roq1 OS=Nicotiana benthamiana OX=4100 GN=ROQ1 PE=1 SV=1	S	Function unknown	PREDICTED: TMV resistance protein N-like [Prunus mume]
PaF106G0800031261.01	100	60	80	7	17	5	1.08443	1.44849	1.1984	0.05067	0.501562	0.152245	3.47563e-08	-1.96234	down	--	--	Biological Process: signal transduction (GO:0007165);; Molecular Function: ADP binding (GO:0043531);;	K00695|2.9e-168|mtr:MTR_6g478030|K00695 sucrose synthase [EC:2.4.1.13] | (RefSeq) sucrose synthase	K00695 | 2.9e-168 | mtr:mtr 6g478030 | K00695蔗糖合酶[EC:2.4.1.13]|（参考顺序）蔗糖合酶	Starch and sucrose metabolism (ko00500)	--	--	TIR domain	Disease resistance protein Roq1 OS=Nicotiana benthamiana OX=4100 GN=ROQ1 PE=1 SV=1	T	Signal transduction mechanisms	TMV resistance protein N [Prunus persica]
PaF106G0200007549.01	72	74	111	10	14	20	0.544897	0.6724	0.874777	0.076733	0.121652	0.150421	2.77494e-08	-1.84273	down	--	--	Biological Process: signal transduction (GO:0007165);; Molecular Function: ADP binding (GO:0043531);;	K00695|2.9e-155|mtr:MTR_6g478030|K00695 sucrose synthase [EC:2.4.1.13] | (RefSeq) sucrose synthase	K00695 | 2.9e-155 | mtr:mtr 6g478030 | K00695蔗糖合酶[EC:2.4.1.13]|（参考顺序）蔗糖合酶	Starch and sucrose metabolism (ko00500)	--	--	TIR domain	TMV resistance protein N OS=Nicotiana glutinosa OX=35889 GN=N PE=1 SV=1	T	Signal transduction mechanisms	TMV resistance protein N-like isoform X3 [Prunus avium]
PaF106G0800032454.01	71	68	43	8	9	9	0.718534	0.81941	0.449696	0.078609	0.103262	0.090474	2.43821e-07	-1.84069	down	[R]	General function prediction only	Biological Process: signal transduction (GO:0007165);; Molecular Function: ADP binding (GO:0043531);;	K00695|8.0e-89|mtr:MTR_6g478030|K00695 sucrose synthase [EC:2.4.1.13] | (RefSeq) sucrose synthase	K00695 | 8.0e-89 | mtr:mtr 6g478030 | K00695蔗糖合酶[EC:2.4.1.13]|（参考顺序）蔗糖合酶	Starch and sucrose metabolism (ko00500)	--	--	NB-ARC domain	Disease resistance protein Roq1 OS=Nicotiana benthamiana OX=4100 GN=ROQ1 PE=1 SV=1	S	Function unknown	PREDICTED: TMV resistance protein N-like [Prunus mume]
PaF106G0800031288.01	451	304	344	120	84	113	2.79437	2.25317	2.19534	0.809342	0.60147	0.695677	3.40038e-16	-1.57742	down	[R]	General function prediction only	Biological Process: signal transduction (GO:0007165);; Cellular Component: integral component of membrane (GO:0016021);; Molecular Function: ADP binding (GO:0043531);;	K00695|2.0e-174|mtr:MTR_6g478030|K00695 sucrose synthase [EC:2.4.1.13] | (RefSeq) sucrose synthase	K00695 | 2.0e-174 | mtr:mtr 6g478030 | K00695蔗糖合酶[EC:2.4.1.13]|（参考顺序）蔗糖合酶	Starch and sucrose metabolism (ko00500)	--	--	TIR domain	TMV resistance protein N OS=Nicotiana glutinosa OX=35889 GN=N PE=1 SV=1	T	Signal transduction mechanisms	TMV resistance protein N-like, partial [Prunus avium]
PaF106G0800032639.01	236	212	256	67	47	93	1.68495	1.81323	1.88706	0.521587	0.386555	0.660829	2.48798e-11	-1.52528	down	[R]	General function prediction only	Biological Process: signal transduction (GO:0007165);; Molecular Function: ADP binding (GO:0043531);;	K00695|7.2e-106|mtr:MTR_6g478030|K00695 sucrose synthase [EC:2.4.1.13] | (RefSeq) sucrose synthase	K00695 | 7.2e-106 | mtr:mtr 6g478030 | K00695蔗糖合酶[EC:2.4.1.13]|（参考顺序）蔗糖合酶	Starch and sucrose metabolism (ko00500)	--	--	TIR domain	TMV resistance protein N OS=Nicotiana glutinosa OX=35889 GN=N PE=1 SV=1	S	Function unknown	PREDICTED: TMV resistance protein N-like [Prunus mume]
PaF106G0800032313.01	229	224	243	62	73	82	1.22324	1.46107	1.35	0.356157	0.451235	0.433315	5.66846e-12	-1.46238	down	[R]	General function prediction only	Biological Process: signal transduction (GO:0007165);; Molecular Function: ADP binding (GO:0043531);;	K00695|7.8e-127|mtr:MTR_6g478030|K00695 sucrose synthase [EC:2.4.1.13] | (RefSeq) sucrose synthase	K00695 | 7.8e-127 | mtr:mtr 6g478030 | K00695蔗糖合酶[EC:2.4.1.13]|（参考顺序）蔗糖合酶	Starch and sucrose metabolism (ko00500)	--	--	TIR domain	Disease resistance protein Roq1 OS=Nicotiana benthamiana OX=4100 GN=ROQ1 PE=1 SV=1	S	Function unknown	PREDICTED: TMV resistance protein N-like [Prunus mume]
PaF106G0100006479.01	332	328	286	97	102	120	5.12743	10.3508	9.0442	0.533762	1.42956	1.28029	3.33358e-13	-1.38719	down	[R]	General function prediction only	Biological Process: signal transduction (GO:0007165);; Molecular Function: ADP binding (GO:0043531);;	K00695|1.4e-135|mtr:MTR_6g478030|K00695 sucrose synthase [EC:2.4.1.13] | (RefSeq) sucrose synthase	K00695 | 1.4e-135 | mtr:mtr 6g478030 | K00695蔗糖合酶[EC:2.4.1.13]|（参考顺序）蔗糖合酶	Starch and sucrose metabolism (ko00500)	--	--	TIR domain	Disease resistance protein RPV1 OS=Vitis rotundifolia OX=103349 GN=RPV1 PE=1 SV=1	T	Signal transduction mechanisms	LOW QUALITY PROTEIN: disease resistance protein RPV1-like [Prunus dulcis]
PaF106G0800032607.01	112	123	104	16	37	60	0.597114	0.784997	0.57252	0.092009	0.23022	0.318647	0.000347205	-1.18544	down	[R]	General function prediction only	Biological Process: signal transduction (GO:0007165);; Molecular Function: ADP binding (GO:0043531);;	K00695|1.8e-123|mtr:MTR_6g478030|K00695 sucrose synthase [EC:2.4.1.13] | (RefSeq) sucrose synthase	K00695 | 1.8e-123 | mtr:mtr 6g478030 | K00695蔗糖合酶[EC:2.4.1.13]|（参考顺序）蔗糖合酶	Starch and sucrose metabolism (ko00500)	--	--	TIR domain	TMV resistance protein N OS=Nicotiana glutinosa OX=35889 GN=N PE=1 SV=1	S	Function unknown	PREDICTED: TMV resistance protein N-like [Prunus mume]
PaF106G0100000244.01	217	413	322	714	552	889	1.35537	3.09731	2.08288	4.88561	4.05282	5.59313	8.59587e-07	1.109	up	[R]	General function prediction only	Biological Process: signal transduction (GO:0007165);; Molecular Function: ADP binding (GO:0043531);;	K00695|2.7e-163|mtr:MTR_6g478030|K00695 sucrose synthase [EC:2.4.1.13] | (RefSeq) sucrose synthase	K00695 | 2.7e-163 | mtr:mtr 6g478030 | K00695蔗糖合酶[EC:2.4.1.13]|（参考顺序）蔗糖合酶	Starch and sucrose metabolism (ko00500)	--	--	TIR domain	Disease resistance protein RPV1 OS=Vitis rotundifolia OX=103349 GN=RPV1 PE=1 SV=1	T	Signal transduction mechanisms	PREDICTED: TMV resistance protein N-like [Prunus mume]
PaF106G0800032374.01	144	128	157	278	322	320	0.728291	0.774968	0.820642	1.53176	1.90287	1.62137	1.23983e-09	1.11911	up	--	--	Biological Process: signal transduction (GO:0007165);; Molecular Function: ADP binding (GO:0043531);;	K00695|9.5e-128|mtr:MTR_6g478030|K00695 sucrose synthase [EC:2.4.1.13] | (RefSeq) sucrose synthase	K00695 | 9.5e-128 | mtr:mtr 6g478030 | K00695蔗糖合酶[EC:2.4.1.13]|（参考顺序）蔗糖合酶	Starch and sucrose metabolism (ko00500)	--	--	TIR domain	TMV resistance protein N OS=Nicotiana glutinosa OX=35889 GN=N PE=1 SV=1	S	Function unknown	PREDICTED: TMV resistance protein N-like [Prunus mume]
PaF106G0100006439.01	104	115	148	270	296	293	0.491349	0.646705	0.72255	1.39054	1.63703	1.38748	5.26231e-09	1.20993	up	[R]	General function prediction only	Biological Process: signal transduction (GO:0007165);; Molecular Function: ADP binding (GO:0043531);;	K00695|4.7e-93|mtr:MTR_6g478030|K00695 sucrose synthase [EC:2.4.1.13] | (RefSeq) sucrose synthase	K00695 | 4.7e-93 | mtr:mtr 6g478030 | K00695蔗糖合酶[EC:2.4.1.13]|（参考顺序）蔗糖合酶	Starch and sucrose metabolism (ko00500)	--	--	NB-ARC domain	TMV resistance protein N OS=Nicotiana glutinosa OX=35889 GN=N PE=1 SV=1	T	Signal transduction mechanisms	TMV resistance protein N isoform X7 [Prunus persica]
PaF106G0800030499.01	286	225	181	474	523	583	2.36599	2.22133	1.55428	4.34814	5.17372	4.99866	1.35346e-12	1.21245	up	[R]	General function prediction only	Biological Process: signal transduction (GO:0007165);; Molecular Function: ADP binding (GO:0043531);;	K00695|6.8e-108|mtr:MTR_6g478030|K00695 sucrose synthase [EC:2.4.1.13] | (RefSeq) sucrose synthase	K00695 | 6.8e-108 | mtr:mtr 6g478030 | K00695蔗糖合酶[EC:2.4.1.13]|（参考顺序）蔗糖合酶	Starch and sucrose metabolism (ko00500)	--	--	TIR domain	TMV resistance protein N OS=Nicotiana glutinosa OX=35889 GN=N PE=1 SV=1	G	Carbohydrate transport and metabolism	PREDICTED: TMV resistance protein N-like [Prunus mume]
PaF106G0800032310.01	286	285	284	607	564	795	1.42608	1.702	1.46185	3.29699	3.28878	3.97343	2.23805e-18	1.22894	up	[R]	General function prediction only	Biological Process: signal transduction (GO:0007165);; Cellular Component: integral component of membrane (GO:0016021);; Molecular Function: ADP binding (GO:0043531);;	K00695|3.3e-133|mtr:MTR_6g478030|K00695 sucrose synthase [EC:2.4.1.13] | (RefSeq) sucrose synthase	K00695 | 3.3e-133 | mtr:mtr 6g478030 | K00695蔗糖合酶[EC:2.4.1.13]|（参考顺序）蔗糖合酶	Starch and sucrose metabolism (ko00500)	--	--	TIR domain	TMV resistance protein N OS=Nicotiana glutinosa OX=35889 GN=N PE=1 SV=1	S	Function unknown	TMV resistance protein N-like [Prunus dulcis]
PaF106G0800030406.01	1361	1497	1539	3272	3015	3741	5.50488	7.78028	6.81683	17.4766	17.7351	18.4319	9.13376e-32	1.23928	up	[R]	General function prediction only	Biological Process: signal transduction (GO:0007165);; Molecular Function: ADP binding (GO:0043531);;	K00695|1.1e-98|mtr:MTR_6g478030|K00695 sucrose synthase [EC:2.4.1.13] | (RefSeq) sucrose synthase	K00695 | 1.1e-98 | mtr:mtr 6g478030 | K00695蔗糖合酶[EC:2.4.1.13]|（参考顺序）蔗糖合酶	Starch and sucrose metabolism (ko00500)	--	--	NB-ARC domain	Disease resistance protein Roq1 OS=Nicotiana benthamiana OX=4100 GN=ROQ1 PE=1 SV=1	T	Signal transduction mechanisms	PREDICTED: uncharacterized protein LOC103334707 [Prunus mume]
PaF106G0800030401.01	290	326	390	788	733	829	1.58636	2.13945	2.20539	4.70849	4.69631	4.55755	1.46595e-16	1.25075	up	[R]	General function prediction only	Biological Process: signal transduction (GO:0007165);; Molecular Function: ADP binding (GO:0043531);;	K00695|1.0e-97|mtr:MTR_6g478030|K00695 sucrose synthase [EC:2.4.1.13] | (RefSeq) sucrose synthase	K00695 | 1.0e-97 | mtr:mtr 6g478030 | K00695蔗糖合酶[EC:2.4.1.13]|（参考顺序）蔗糖合酶	Starch and sucrose metabolism (ko00500)	--	--	TIR domain	TMV resistance protein N OS=Nicotiana glutinosa OX=35889 GN=N PE=1 SV=1	T	Signal transduction mechanisms	PREDICTED: probable disease resistance protein RPP1 isoform X2 [Prunus mume]
PaF106G0100006300.01	318	277	249	679	586	780	1.80433	1.8789	1.45323	4.19212	3.88156	4.43233	4.66807e-21	1.3101	up	[R]	General function prediction only	Biological Process: signal transduction (GO:0007165);; Molecular Function: ADP binding (GO:0043531);;	K00695|5.0e-126|mtr:MTR_6g478030|K00695 sucrose synthase [EC:2.4.1.13] | (RefSeq) sucrose synthase	K00695 | 5.0e-126 | mtr:mtr 6g478030 | K00695蔗糖合酶[EC:2.4.1.13]|（参考顺序）蔗糖合酶	Starch and sucrose metabolism (ko00500)	--	--	TIR domain	Disease resistance protein RPV1 OS=Vitis rotundifolia OX=103349 GN=RPV1 PE=1 SV=1	T	Signal transduction mechanisms	disease resistance protein RPV1-like [Prunus dulcis]
Prunus_sibirica_newGene_1975	187	207	250	485	495	617	1.9114	2.23872	2.31779	7.90381	9.25751	10.1501	1.39486e-15	1.31691	up	[R]	General function prediction only	Biological Process: signal transduction (GO:0007165);; Molecular Function: ADP binding (GO:0043531);;	K00695|3.8e-47|mtr:MTR_6g478030|K00695 sucrose synthase [EC:2.4.1.13] | (RefSeq) sucrose synthase	K00695 | 3.8e-47 | mtr:mtr 6g478030 | K00695蔗糖合酶[EC:2.4.1.13]|（参考顺序）蔗糖合酶	Starch and sucrose metabolism (ko00500)	--	--	NB-ARC domain	Disease resistance protein RPV1 OS=Vitis rotundifolia OX=103349 GN=RPV1 PE=1 SV=1	T	Signal transduction mechanisms	TMV resistance protein N isoform X2 [Prunus persica]
PaF106G0100006388.01	375	228	271	648	713	822	2.09764	1.52264	1.55988	3.94546	4.65142	4.6007	2.5662e-19	1.35846	up	[R]	General function prediction only	Biological Process: signal transduction (GO:0007165);; Molecular Function: ADP binding (GO:0043531);;	K00695|5.2e-84|mtr:MTR_6g478030|K00695 sucrose synthase [EC:2.4.1.13] | (RefSeq) sucrose synthase	K00695 | 5.2e-84 | mtr:mtr 6g478030 | K00695蔗糖合酶[EC:2.4.1.13]|（参考顺序）蔗糖合酶	Starch and sucrose metabolism (ko00500)	--	--	NB-ARC domain	TMV resistance protein N OS=Nicotiana glutinosa OX=35889 GN=N PE=1 SV=1	T	Signal transduction mechanisms	TMV resistance protein N [Prunus persica]
PaF106G0800030409.01	206	208	190	524	466	619	1.06246	1.28827	1.01115	2.95379	2.81418	3.20658	1.965e-21	1.428	up	[R]	General function prediction only	Biological Process: signal transduction (GO:0007165);; Molecular Function: ADP binding (GO:0043531);;	K00695|8.5e-98|mtr:MTR_6g478030|K00695 sucrose synthase [EC:2.4.1.13] | (RefSeq) sucrose synthase	K00695 | 8.5e-98 | mtr:mtr 6g478030 | K00695蔗糖合酶[EC:2.4.1.13]|（参考顺序）蔗糖合酶	Starch and sucrose metabolism (ko00500)	--	--	TIR domain	TMV resistance protein N OS=Nicotiana glutinosa OX=35889 GN=N PE=1 SV=1	T	Signal transduction mechanisms	PREDICTED: probable disease resistance protein RPP1 isoform X2 [Prunus mume]
PaF106G0800032368.01	34	31	28	91	89	116	0.213421	0.235438	0.18288	0.630933	0.655738	0.739583	2.47903e-07	1.46551	up	--	--	Biological Process: signal transduction (GO:0007165);; Cellular Component: integral component of membrane (GO:0016021);; Molecular Function: ADP binding (GO:0043531);;	K00695|2.4e-111|mtr:MTR_6g478030|K00695 sucrose synthase [EC:2.4.1.13] | (RefSeq) sucrose synthase	K00695 | 2.4e-111 | mtr:mtr 6g478030 | K00695蔗糖合酶[EC:2.4.1.13]|（参考顺序）蔗糖合酶	Starch and sucrose metabolism (ko00500)	--	--	TIR domain	Disease resistance protein Roq1 OS=Nicotiana benthamiana OX=4100 GN=ROQ1 PE=1 SV=1	S	Function unknown	TMV resistance protein N [Prunus persica]
PaF106G0800032651.01	122	128	170	364	383	437	0.696433	0.871484	0.999608	2.26117	2.55416	2.49744	6.27433e-16	1.47866	up	[K]	Transcription	Biological Process: signal transduction (GO:0007165);; Molecular Function: ADP binding (GO:0043531);;	K00695|2.6e-119|mtr:MTR_6g478030|K00695 sucrose synthase [EC:2.4.1.13] | (RefSeq) sucrose synthase	K00695 | 2.6e-119 | mtr:mtr 6g478030 | K00695蔗糖合酶[EC:2.4.1.13]|（参考顺序）蔗糖合酶	Starch and sucrose metabolism (ko00500)	--	--	TIR domain	TMV resistance protein N OS=Nicotiana glutinosa OX=35889 GN=N PE=1 SV=1	S	Function unknown	PREDICTED: TMV resistance protein N-like [Prunus mume]
PaF106G0800030449.01	93	88	97	232	290	324	0.482718	0.546267	0.52161	1.32044	1.76863	1.69636	3.98662e-15	1.56191	up	[R]	General function prediction only	Biological Process: signal transduction (GO:0007165);; Molecular Function: ADP binding (GO:0043531);;	K00695|1.3e-103|mtr:MTR_6g478030|K00695 sucrose synthase [EC:2.4.1.13] | (RefSeq) sucrose synthase	K00695 | 1.3e-103 | mtr:mtr 6g478030 | K00695蔗糖合酶[EC:2.4.1.13]|（参考顺序）蔗糖合酶	Starch and sucrose metabolism (ko00500)	--	--	TIR domain	TMV resistance protein N OS=Nicotiana glutinosa OX=35889 GN=N PE=1 SV=1	T	Signal transduction mechanisms	PREDICTED: disease resistance protein TAO1-like isoform X1 [Prunus mume]
PaF106G0800032154.01	40	33	37	123	119	139	0.223161	0.216706	0.208139	0.744409	0.771588	0.777069	2.83444e-10	1.63024	up	[R]	General function prediction only	Biological Process: signal transduction (GO:0007165);; Molecular Function: ADP binding (GO:0043531);;	K00695|7.3e-127|mtr:MTR_6g478030|K00695 sucrose synthase [EC:2.4.1.13] | (RefSeq) sucrose synthase	K00695 | 7.3e-127 | mtr:mtr 6g478030 | K00695蔗糖合酶[EC:2.4.1.13]|（参考顺序）蔗糖合酶	Starch and sucrose metabolism (ko00500)	--	--	TIR domain	TMV resistance protein N OS=Nicotiana glutinosa OX=35889 GN=N PE=1 SV=1	S	Function unknown	TMV resistance protein N [Prunus persica]
PaF106G0200008349.01	345	189	284	878	841	827	2.03934	1.32685	1.71175	5.73978	5.90622	5.01033	2.07361e-24	1.66179	up	[R]	General function prediction only	Biological Process: signal transduction (GO:0007165);; Molecular Function: ADP binding (GO:0043531);;	K00695|1.8e-114|mtr:MTR_6g478030|K00695 sucrose synthase [EC:2.4.1.13] | (RefSeq) sucrose synthase	K00695 | 1.8e-114 | mtr:mtr 6g478030 | K00695蔗糖合酶[EC:2.4.1.13]|（参考顺序）蔗糖合酶	Starch and sucrose metabolism (ko00500)	--	--	TIR domain	Disease resistance protein RUN1 OS=Vitis rotundifolia OX=103349 GN=RUN1 PE=1 SV=1	S	Function unknown	TMV resistance protein N isoform X2 [Prunus persica]
PaF106G0800030456.01	208	167	186	574	556	661	1.43904	1.38557	1.3294	4.32603	4.49348	4.58625	1.53877e-35	1.70105	up	[R]	General function prediction only	Biological Process: signal transduction (GO:0007165);; Molecular Function: ADP binding (GO:0043531);;	K00695|3.9e-100|mtr:MTR_6g478030|K00695 sucrose synthase [EC:2.4.1.13] | (RefSeq) sucrose synthase	K00695 | 3.9e-100 | mtr:mtr 6g478030 | K00695蔗糖合酶[EC:2.4.1.13]|（参考顺序）蔗糖合酶	Starch and sucrose metabolism (ko00500)	--	--	TIR domain	TMV resistance protein N OS=Nicotiana glutinosa OX=35889 GN=N PE=1 SV=1	T	Signal transduction mechanisms	uncharacterized protein LOC110744265 [Prunus avium]
PaF106G0800032549.01	17	17	22	75	66	99	0.097484	0.112384	0.129143	0.466261	0.442926	0.569946	6.61307e-08	1.702	up	[R]	General function prediction only	Biological Process: signal transduction (GO:0007165);; Molecular Function: ADP binding (GO:0043531);;	K00695|6.6e-139|mtr:MTR_6g478030|K00695 sucrose synthase [EC:2.4.1.13] | (RefSeq) sucrose synthase	K00695 | 6.6e-139 | mtr:mtr 6g478030 | K00695蔗糖合酶[EC:2.4.1.13]|（参考顺序）蔗糖合酶	Starch and sucrose metabolism (ko00500)	--	--	TIR domain	TMV resistance protein N OS=Nicotiana glutinosa OX=35889 GN=N PE=1 SV=1	S	Function unknown	TMV resistance protein N isoform X1 [Prunus persica]
PaF106G0100006489.01	388	306	373	1093	1011	1349	2.87558	1.79957	2.94073	10.049	9.78234	11.2001	4.97493e-54	1.73657	up	[R]	General function prediction only	Biological Process: signal transduction (GO:0007165);; Molecular Function: ADP binding (GO:0043531);;	K00695|1.1e-135|mtr:MTR_6g478030|K00695 sucrose synthase [EC:2.4.1.13] | (RefSeq) sucrose synthase	K00695 | 1.1e-135 | mtr:mtr 6g478030 | K00695蔗糖合酶[EC:2.4.1.13]|（参考顺序）蔗糖合酶	Starch and sucrose metabolism (ko00500)	--	--	TIR domain	TMV resistance protein N OS=Nicotiana glutinosa OX=35889 GN=N PE=1 SV=1	T	Signal transduction mechanisms	TMV resistance protein N isoform X1 [Prunus persica]
PaF106G0800032548.01	15	9	6	44	68	59	0.086625	0.057584	0.036299	0.281094	0.468447	0.344647	9.81887e-07	1.76057	up	--	--	Biological Process: signal transduction (GO:0007165);; Molecular Function: ADP binding (GO:0043531);;	K00695|3.6e-39|mtr:MTR_6g478030|K00695 sucrose synthase [EC:2.4.1.13] | (RefSeq) sucrose synthase	K00695 | 3.6e-39 | mtr:mtr 6g478030 | K00695蔗糖合酶[EC:2.4.1.13]|（参考顺序）蔗糖合酶	Starch and sucrose metabolism (ko00500)	--	--	Leucine rich repeat	TMV resistance protein N OS=Nicotiana glutinosa OX=35889 GN=N PE=1 SV=1	S	Function unknown	TMV resistance protein N isoform X1 [Prunus persica]
PaF106G0200008425.01	22	16	13	67	121	88	0.185629	0.160675	0.104951	0.60765	1.18548	0.741675	5.91887e-09	1.91032	up	[R]	General function prediction only	Biological Process: signal transduction (GO:0007165);; Molecular Function: ADP binding (GO:0043531);;	K00695|7.1e-81|mtr:MTR_6g478030|K00695 sucrose synthase [EC:2.4.1.13] | (RefSeq) sucrose synthase	K00695 | 7.1e-81 | mtr:mtr 6g478030 | K00695蔗糖合酶[EC:2.4.1.13]|（参考顺序）蔗糖合酶	Starch and sucrose metabolism (ko00500)	--	--	NB-ARC domain	Disease resistance protein RUN1 OS=Vitis rotundifolia OX=103349 GN=RUN1 PE=1 SV=1	--	--	TMV resistance protein N-like [Prunus avium]
PaF106G0400014719.01	144	134	164	775	631	817	0.697552	0.779283	0.819279	4.1025	3.5824	3.98012	2.89106e-56	2.31411	up	[R]	General function prediction only	Biological Process: signal transduction (GO:0007165);; Molecular Function: ADP binding (GO:0043531);;	K00695|2.7e-157|mtr:MTR_6g478030|K00695 sucrose synthase [EC:2.4.1.13] | (RefSeq) sucrose synthase	K00695 | 2.7e-157 | mtr:mtr 6g478030 | K00695蔗糖合酶[EC:2.4.1.13]|（参考顺序）蔗糖合酶	Starch and sucrose metabolism (ko00500)	--	--	TIR domain	Disease resistance protein Roq1 OS=Nicotiana benthamiana OX=4100 GN=ROQ1 PE=1 SV=1	--	--	PREDICTED: disease resistance protein TAO1-like [Prunus mume]
PaF106G0200008354.01	49	34	27	221	254	210	0.290944	0.293786	0.162073	1.7599	1.97258	1.70033	9.79627e-22	2.38816	up	[R]	General function prediction only	Biological Process: signal transduction (GO:0007165);; Molecular Function: ADP binding (GO:0043531);;	K00695|1.1e-114|mtr:MTR_6g478030|K00695 sucrose synthase [EC:2.4.1.13] | (RefSeq) sucrose synthase	K00695 | 1.1e-114 | mtr:mtr 6g478030 | K00695蔗糖合酶[EC:2.4.1.13]|（参考顺序）蔗糖合酶	Starch and sucrose metabolism (ko00500)	--	--	TIR domain	Disease resistance protein RUN1 OS=Vitis rotundifolia OX=103349 GN=RUN1 PE=1 SV=1	S	Function unknown	TMV resistance protein N isoform X1 [Prunus persica]
PaF106G0200008345.01	61	33	51	344	318	298	0.360467	0.232728	0.311399	2.22008	2.19983	1.76761	2.60449e-31	2.55721	up	[R]	General function prediction only	Biological Process: signal transduction (GO:0007165);; Molecular Function: ADP binding (GO:0043531);;	K00695|2.6e-97|mtr:MTR_6g478030|K00695 sucrose synthase [EC:2.4.1.13] | (RefSeq) sucrose synthase	K00695 | 2.6e-97 | mtr:mtr 6g478030 | K00695蔗糖合酶[EC:2.4.1.13]|（参考文献）蔗糖合酶	Starch and sucrose metabolism (ko00500)	--	--	TIR domain	Disease resistance protein RUN1 OS=Vitis rotundifolia OX=103349 GN=RUN1 PE=1 SV=1	S	Function unknown	TMV resistance protein N isoform X1 [Prunus persica]
PaF106G0800032319.01	91	89	78	534	506	605	0.49561	0.583699	0.442294	3.19119	3.2436	3.32777	1.44889e-58	2.61374	up	[R]	General function prediction only	Biological Process: signal transduction (GO:0007165);; Molecular Function: ADP binding (GO:0043531);;	K00695|5.7e-130|mtr:MTR_6g478030|K00695 sucrose synthase [EC:2.4.1.13] | (RefSeq) sucrose synthase	K00695 | 5.7e-130 | mtr:mtr 6g478030 | K00695蔗糖合酶[EC:2.4.1.13]|（参考顺序）蔗糖合酶	Starch and sucrose metabolism (ko00500)	--	--	TIR domain	TMV resistance protein N OS=Nicotiana glutinosa OX=35889 GN=N PE=1 SV=1	S	Function unknown	PREDICTED: TMV resistance protein N-like [Prunus mume]
PaF106G0200008357.01	26	12	23	172	159	163	0.154925	0.08375	0.138361	1.12104	1.11006	0.974214	4.58548e-22	2.61775	up	[R]	General function prediction only	Biological Process: signal transduction (GO:0007165);; Molecular Function: ADP binding (GO:0043531);;	K00695|2.9e-115|mtr:MTR_6g478030|K00695 sucrose synthase [EC:2.4.1.13] | (RefSeq) sucrose synthase	K00695 | 2.9e-115 | mtr:mtr 6g478030 | K00695蔗糖合酶[EC:2.4.1.13]|（参考顺序）蔗糖合酶	Starch and sucrose metabolism (ko00500)	--	--	TIR domain	Disease resistance protein RUN1 OS=Vitis rotundifolia OX=103349 GN=RUN1 PE=1 SV=1	S	Function unknown	TMV resistance protein N isoform X1 [Prunus persica]
PaF106G0200008436.01	57	34	37	259	364	397	0.325144	0.239773	0.218787	1.91812	2.4929	2.34039	1.8966e-34	2.76257	up	[R]	General function prediction only	Biological Process: signal transduction (GO:0007165);; Molecular Function: ADP binding (GO:0043531);;	K00695|7.7e-116|mtr:MTR_6g478030|K00695 sucrose synthase [EC:2.4.1.13] | (RefSeq) sucrose synthase	K00695 | 7.7e-116 | mtr:mtr 6g478030 | K00695蔗糖合酶[EC:2.4.1.13]|（参考顺序）蔗糖合酶	Starch and sucrose metabolism (ko00500)	--	--	TIR domain	Disease resistance protein RUN1 OS=Vitis rotundifolia OX=103349 GN=RUN1 PE=1 SV=1	S	Function unknown	PREDICTED: TMV resistance protein N-like [Prunus mume]
PaF106G0800032661.01	0	6	5	75	73	85	0	0.042499	0.030595	0.49874	0.524214	0.525563	3.20815e-15	2.78215	up	--	--	Molecular Function: protein binding (GO:0005515);; Biological Process: signal transduction (GO:0007165);; Molecular Function: ADP binding (GO:0043531);;	K00695|1.6e-141|mtr:MTR_6g478030|K00695 sucrose synthase [EC:2.4.1.13] | (RefSeq) sucrose synthase	K00695 | 1.6e-141 | mtr:mtr 6g478030 | K00695蔗糖合酶[EC:2.4.1.13]|（参考顺序）蔗糖合酶	Starch and sucrose metabolism (ko00500)	--	--	TIR domain	Disease resistance protein Roq1 OS=Nicotiana benthamiana OX=4100 GN=ROQ1 PE=1 SV=1	T	Signal transduction mechanisms	TMV resistance protein N-like [Prunus avium]
PaF106G0400014718.01	15	14	25	190	146	187	0.175421	0.194518	0.293527	2.44373	2.00699	2.21311	8.42246e-25	2.8016	up	[R]	General function prediction only	Biological Process: signal transduction (GO:0007165);; Molecular Function: ADP binding (GO:0043531);;	K00695|3.7e-126|mtr:MTR_6g478030|K00695 sucrose synthase [EC:2.4.1.13] | (RefSeq) sucrose synthase	K00695 | 3.7e-126 | mtr:mtr 6g478030 | K00695蔗糖合酶[EC:2.4.1.13]|（参考顺序）蔗糖合酶	Starch and sucrose metabolism (ko00500)	--	--	TIR domain	Disease resistance protein RPV1 OS=Vitis rotundifolia OX=103349 GN=RPV1 PE=1 SV=1	--	--	PREDICTED: disease resistance protein TAO1-like [Prunus mume]
PaF106G0700028366.01	0	0	0	63	78	45	0	0	0	0.567683	0.752329	0.368889	5.66808e-17	3.10305	up	--	--	Biological Process: signal transduction (GO:0007165);; Molecular Function: ADP binding (GO:0043531);;	K00695|6.2e-64|mtr:MTR_6g478030|K00695 sucrose synthase [EC:2.4.1.13] | (RefSeq) sucrose synthase	K00695 | 6.2e-64 | mtr:mtr 6g478030 | K00695蔗糖合酶[EC:2.4.1.13]|（参考顺序）蔗糖合酶	Starch and sucrose metabolism (ko00500)	--	--	NB-ARC domain	TMV resistance protein N OS=Nicotiana glutinosa OX=35889 GN=N PE=1 SV=1	S	Function unknown	PREDICTED: TMV resistance protein N-like [Prunus mume]
PaF106G0800032875.01	0	7	4	88	96	127	0	0.061232	0.025986	0.69618	0.815796	0.924507	9.75153e-21	3.17621	up	[R]	General function prediction only	Biological Process: signal transduction (GO:0007165);; Molecular Function: ADP binding (GO:0043531);;	K00695|9.4e-125|mtr:MTR_6g478030|K00695 sucrose synthase [EC:2.4.1.13] | (RefSeq) sucrose synthase	K00695 | 9.4e-125 | mtr:mtr 6g478030 | K00695蔗糖合酶[EC:2.4.1.13]|（参考顺序）蔗糖合酶	Starch and sucrose metabolism (ko00500)	--	--	TIR domain	Disease resistance protein RUN1 OS=Vitis rotundifolia OX=103349 GN=RUN1 PE=1 SV=1	S	Function unknown	TMV resistance protein N isoform X1 [Prunus persica]
PaF106G0800032447.01	24	26	37	374	404	520	0.121571	0.153209	0.193755	2.06819	2.40435	2.71518	1.36928e-64	3.59632	up	[R]	General function prediction only	Biological Process: signal transduction (GO:0007165);; Molecular Function: ADP binding (GO:0043531);;	K00695|8.3e-129|mtr:MTR_6g478030|K00695 sucrose synthase [EC:2.4.1.13] | (RefSeq) sucrose synthase	K00695 | 8.3e-129 | mtr:mtr 6g478030 | K00695蔗糖合酶[EC:2.4.1.13]|（参考顺序）蔗糖合酶	Starch and sucrose metabolism (ko00500)	--	--	TIR domain	Disease resistance protein Roq1 OS=Nicotiana benthamiana OX=4100 GN=ROQ1 PE=1 SV=1	S	Function unknown	PREDICTED: TMV resistance protein N-like [Prunus mume]
PaF106G0800030461.01	162	216	187	2321	2143	2971	1.15465	1.76331	1.16897	14.9011	14.2372	16.7217	2.97412e-154	3.64292	up	[R]	General function prediction only	Biological Process: signal transduction (GO:0007165);; Molecular Function: ADP binding (GO:0043531);;	K00695|7.0e-102|mtr:MTR_6g478030|K00695 sucrose synthase [EC:2.4.1.13] | (RefSeq) sucrose synthase	K00695 | 7.0e-102 | mtr:mtr 6g478030 | K00695蔗糖合酶[EC:2.4.1.13]|（参考顺序）蔗糖合酶	Starch and sucrose metabolism (ko00500)	--	--	TIR domain	TMV resistance protein N OS=Nicotiana glutinosa OX=35889 GN=N PE=1 SV=1	S	Function unknown	PREDICTED: TMV resistance protein N-like [Prunus mume]
PaF106G0800032547.01	24	24	24	397	338	483	0.140792	0.172319	0.149912	2.61563	2.3922	2.93263	1.32443e-68	3.746	up	[R]	General function prediction only	Biological Process: signal transduction (GO:0007165);; Molecular Function: ADP binding (GO:0043531);;	K00695|1.8e-113|mtr:MTR_6g478030|K00695 sucrose synthase [EC:2.4.1.13] | (RefSeq) sucrose synthase	K00695 | 1.8e-113 | mtr:mtr 6g478030 | K00695蔗糖合酶[EC:2.4.1.13]|（参考顺序）蔗糖合酶	Starch and sucrose metabolism (ko00500)	--	--	TIR domain	Disease resistance protein RUN1 OS=Vitis rotundifolia OX=103349 GN=RUN1 PE=1 SV=1	S	Function unknown	hypothetical protein PRUPE_8G056700 [Prunus persica]
PaF106G0800032487.01	182	168	108	2628	2565	3214	0.93168	1.02087	0.63051	15.4305	15.8986	17.1638	6.75962e-188	4.11077	up	[R]	General function prediction only	Biological Process: signal transduction (GO:0007165);; Molecular Function: ADP binding (GO:0043531);;	K00695|2.4e-101|mtr:MTR_6g478030|K00695 sucrose synthase [EC:2.4.1.13] | (RefSeq) sucrose synthase	K00695 | 2.4e-101 | mtr:mtr 6g478030 | K00695蔗糖合酶[EC:2.4.1.13]|（参考顺序）蔗糖合酶	Starch and sucrose metabolism (ko00500)	--	--	TIR domain	Disease resistance protein Roq1 OS=Nicotiana benthamiana OX=4100 GN=ROQ1 PE=1 SV=1	S	Function unknown	PREDICTED: TMV resistance protein N-like isoform X2 [Prunus mume]
Prunus_sibirica_newGene_1338	7	5	5	226	234	208	0.032105	0.024194	0.023004	1.15863	1.28456	0.978153	1.69787e-47	4.1749	up	--	--	Biological Process: signal transduction (GO:0007165);; Molecular Function: ADP binding (GO:0043531);;	K00695|2.1e-97|mtr:MTR_6g478030|K00695 sucrose synthase [EC:2.4.1.13] | (RefSeq) sucrose synthase	K00695 | 2.1e-97 | mtr:mtr 6g478030 | K00695蔗糖合酶[EC:2.4.1.13]|（参考顺序）蔗糖合酶	Starch and sucrose metabolism (ko00500)	--	--	TIR domain	Disease resistance protein Roq1 OS=Nicotiana benthamiana OX=4100 GN=ROQ1 PE=1 SV=1	S	Function unknown	PREDICTED: TMV resistance protein N-like [Prunus mume]
PaF106G0800031206.01	5	3	0	253	217	293	0.083776	0.041869	0	4.63822	4.25037	4.94051	2.3798e-58	4.78226	up	--	--	Biological Process: signal transduction (GO:0007165);; Molecular Function: ADP binding (GO:0043531);;	K00695|1.6e-60|mtr:MTR_6g478030|K00695 sucrose synthase [EC:2.4.1.13] | (RefSeq) sucrose synthase	K00695 | 1.6e-60 | mtr:mtr 6g478030 | K00695蔗糖合酶[EC:2.4.1.13]|（参考顺序）蔗糖合酶	Starch and sucrose metabolism (ko00500)	--	--	TIR domain	Disease resistance protein RPV1 OS=Vitis rotundifolia OX=103349 GN=RPV1 PE=1 SV=1	--	--	TMV resistance protein N [Prunus persica]
PaF106G0400014852.01	18	24	26	796	783	973	0.09523	0.148628	0.21219	4.66244	4.92627	5.27242	1.3757e-144	4.88581	up	[R]	General function prediction only	Biological Process: signal transduction (GO:0007165);; Molecular Function: ADP binding (GO:0043531);;	K00695|2.5e-161|mtr:MTR_6g478030|K00695 sucrose synthase [EC:2.4.1.13] | (RefSeq) sucrose synthase	K00695 | 2.5e-161 | mtr:mtr 6g478030 | K00695蔗糖合酶[EC:2.4.1.13]|（参考文献）蔗糖合酶	Starch and sucrose metabolism (ko00500)	--	--	TIR domain	Disease resistance protein Roq1 OS=Nicotiana benthamiana OX=4100 GN=ROQ1 PE=1 SV=1	--	--	PREDICTED: disease resistance protein TAO1-like [Prunus mume]
PaF106G0800032588.01	0	2	0	329	356	549	0	0.009995	0	2.12865	2.66032	3.51911	8.33801e-80	5.69611	up	--	--	Molecular Function: protein binding (GO:0005515);; Biological Process: signal transduction (GO:0007165);; Molecular Function: ADP binding (GO:0043531);;	K00695|6.2e-141|mtr:MTR_6g478030|K00695 sucrose synthase [EC:2.4.1.13] | (RefSeq) sucrose synthase	K00695 | 6.2e-141 | mtr:mtr 6g478030 | K00695蔗糖合酶[EC:2.4.1.13]|（参考顺序）蔗糖合酶	Starch and sucrose metabolism (ko00500)	--	--	TIR domain	Disease resistance protein Roq1 OS=Nicotiana benthamiana OX=4100 GN=ROQ1 PE=1 SV=1	T	Signal transduction mechanisms	TMV resistance protein N-like [Prunus avium]
PaF106G0800032652.01	2	0	0	383	491	455	0.008795	0	0	2.10983	2.90043	2.30391	4.10651e-86	5.84896	up	[R]	General function prediction only	Biological Process: signal transduction (GO:0007165);; Molecular Function: ADP binding (GO:0043531);;	K00695|2.5e-129|mtr:MTR_6g478030|K00695 sucrose synthase [EC:2.4.1.13] | (RefSeq) sucrose synthase	K00695 | 8.2e-89 | mtr:mtr 6g478030 | K00695蔗糖合酶[EC:2.4.1.13]|（参考顺序）蔗糖合酶	Starch and sucrose metabolism (ko00500)	--	--	TIR domain	TMV resistance protein N OS=Nicotiana glutinosa OX=35889 GN=N PE=1 SV=1	S	Function unknown	PREDICTED: TMV resistance protein N-like [Prunus mume]
PaF106G0700028369.01	0	5	0	2307	2068	2810	0	0.01777	0	8.53529	8.2081	9.62021	4.29382e-222	7.97302	up	--	--	Biological Process: signal transduction (GO:0007165);; Molecular Function: ADP binding (GO:0043531);;	K00695|8.2e-89|mtr:MTR_6g478030|K00695 sucrose synthase [EC:2.4.1.13] | (RefSeq) sucrose synthase	K00695 | 8.2e-89 | mtr:mtr 6g478030 | K00695蔗糖合酶[EC:2.4.1.13]|（参考顺序）蔗糖合酶	Starch and sucrose metabolism (ko00500)	--	--	TIR domain	Disease resistance protein Roq1 OS=Nicotiana benthamiana OX=4100 GN=ROQ1 PE=1 SV=1	S	Function unknown	PREDICTED: disease resistance protein RPS6-like [Prunus mume]
PaF106G0600021580.01	901	697	723	97	87	120	10.9598	10.1485	9.07614	1.27748	1.23266	1.4577	3.88849e-73	-2.71997	down	[G]	Carbohydrate transport and metabolism	Biological Process: carbohydrate metabolic process (GO:0005975);; Molecular Function: beta-glucosidase activity (GO:0008422);; Biological Process: response to salt stress (GO:0009651);; Biological Process: glucosinolate catabolic process (GO:0019762);;	K01188|5.1e-80|pper:18774589|K01188 beta-glucosidase [EC:3.2.1.21] | (RefSeq) beta-glucosidase 13	K01188 | 5.1e-80 | pper:18774589 | K01188β-葡萄糖苷酶[EC:3.2.1.21]|（参考文献）β-葡萄糖苷酶13	Cyanoamino acid metabolism (ko00460);; Starch and sucrose metabolism (ko00500);; Phenylpropanoid biosynthesis (ko00940)	[G]	Carbohydrate transport and metabolism	Glycosyl hydrolase family 1	Non-cyanogenic beta-glucosidase OS=Trifolium repens OX=3899 PE=1 SV=1	G	Carbohydrate transport and metabolism	hypothetical protein PRUPE_6G018800 [Prunus persica]
PaF106G0600024201.01	1605	1332	1078	235	322	407	18.7942	18.683	13.1062	2.98153	4.3904	4.77905	3.34464e-29	-1.87392	down	--	--	Molecular Function: hydrolase activity, hydrolyzing O-glycosyl compounds (GO:0004553);; Biological Process: carbohydrate metabolic process (GO:0005975);; Cellular Component: anchored component of plasma membrane (GO:0046658);;	K19891|5.4e-25|smo:SELMODRAFT_87871|K19891 glucan endo-1,3-beta-glucosidase 1/2/3 [EC:3.2.1.39] | (RefSeq) hypothetical protein	K19891 | 5.4e-25 | smo:Selmodraft87871 | K19891-葡聚糖内切-1,3-β-葡萄糖苷酶1/2/3[EC:3.2.1.39]|（参考顺序）假设蛋白质	Starch and sucrose metabolism (ko00500)	--	--	X8 domain	Glucan endo-1,3-beta-glucosidase 12 OS=Arabidopsis thaliana OX=3702 GN=At4g29360 PE=2 SV=1	G	Carbohydrate transport and metabolism	unnamed protein product [Prunus armeniaca]
PaF106G0300013167.01	141	96	104	34	55	43	3.85506	3.12735	2.9448	1.01088	1.73834	1.16649	0.000300062	-1.05647	down	--	--	Cellular Component: integral component of membrane (GO:0016021);;	K19891|1.3e-18|ini:109171869|K19891 glucan endo-1,3-beta-glucosidase 1/2/3 [EC:3.2.1.39] | (RefSeq) glucan endo-1,3-beta-glucosidase 3-like	K19891 | 1.3e-18 | ini:109171869 | K19891-葡聚糖内切-1,3-β-葡萄糖苷酶1/2/3[EC:3.2.1.39]|（参考顺序）葡聚糖内切-1,3-β-葡萄糖苷酶3-样	Starch and sucrose metabolism (ko00500)	--	--	X8 domain	PLASMODESMATA CALLOSE-BINDING PROTEIN 5 OS=Arabidopsis thaliana OX=3702 GN=PDCB5 PE=2 SV=2	S	Function unknown	unnamed protein product [Prunus armeniaca]
PaF106G0400016282.01	56	72	88	125	171	209	0.77267	1.22142	1.31655	2.01569	2.73739	4.48132	2.24547e-05	1.12321	up	[G]	Carbohydrate transport and metabolism	Molecular Function: hydrolase activity, hydrolyzing O-glycosyl compounds (GO:0004553);; Biological Process: carbohydrate metabolic process (GO:0005975);; Cellular Component: integral component of membrane (GO:0016021);;	K01188|4.8e-208|pper:18775538|K01188 beta-glucosidase [EC:3.2.1.21] | (RefSeq) beta-glucosidase 12	K01188 | 4.8e-208 | pper:18775538 | K01188β-葡萄糖苷酶[EC:3.2.1.21]|（参考文献）β-葡萄糖苷酶12	Cyanoamino acid metabolism (ko00460);; Starch and sucrose metabolism (ko00500);; Phenylpropanoid biosynthesis (ko00940)	[G]	Carbohydrate transport and metabolism	Glycosyl hydrolase family 1	Beta-glucosidase 12 OS=Oryza sativa subsp. indica OX=39946 GN=BGLU12 PE=3 SV=1	G	Carbohydrate transport and metabolism	beta-glucosidase 12 isoform X2 [Prunus persica]
PaF106G0200009803.01	16002	12071	16688	34932	34661	36722	206.262	186.204	221.886	490.07	521.529	473.924	7.09206e-48	1.32553	up	--	--	Molecular Function: hydrolase activity, hydrolyzing O-glycosyl compounds (GO:0004553);; Biological Process: carbohydrate metabolic process (GO:0005975);;	K19891|2.5e-76|bna:106401262|K19891 glucan endo-1,3-beta-glucosidase 1/2/3 [EC:3.2.1.39] | (RefSeq) glucan endo-1,3-beta-glucosidase 3	K19891 | 2.5e-76 | bna:106401262 | K19891葡聚糖内切-1,3-β-葡萄糖苷酶1/2/3[EC:3.2.1.39]|（参考文献）葡聚糖内切-1,3-β-葡萄糖苷酶3	Starch and sucrose metabolism (ko00500)	--	--	Glycosyl hydrolases family 17	Glucan endo-1,3-beta-glucosidase OS=Triticum aestivum OX=4565 GN=GLC1 PE=2 SV=1	G	Carbohydrate transport and metabolism	unnamed protein product [Prunus armeniaca]
PaF106G0400015976.01	467	252	310	960	806	934	5.41	3.49855	3.70443	12.1218	10.9149	10.8446	3.39128e-18	1.424	up	[G]	Carbohydrate transport and metabolism	Molecular Function: hydrolase activity, hydrolyzing O-glycosyl compounds (GO:0004553);; Biological Process: carbohydrate metabolic process (GO:0005975);;	K05350|9.4e-295|pmum:103326243|K05350 beta-glucosidase [EC:3.2.1.21] | (RefSeq) beta-glucosidase 18-like	K05350 | 9.4e-295 | pmum:103326243 | K05350β-葡萄糖苷酶[EC:3.2.1.21]|（参考文献）β-葡萄糖苷酶18类似物	Cyanoamino acid metabolism (ko00460);; Starch and sucrose metabolism (ko00500);; Phenylpropanoid biosynthesis (ko00940)	[G]	Carbohydrate transport and metabolism	Glycosyl hydrolase family 1	Beta-glucosidase 18 OS=Oryza sativa subsp. japonica OX=39947 GN=BGLU18 PE=3 SV=2	G	Carbohydrate transport and metabolism	PREDICTED: beta-glucosidase 18-like [Prunus mume]
PaF106G0100001412.01	43	25	19	150	95	145	0.798468	0.549048	0.363394	3.05134	2.07122	2.72015	7.59654e-10	1.83099	up	--	--	Molecular Function: hydrolase activity, hydrolyzing O-glycosyl compounds (GO:0004553);; Biological Process: carbohydrate metabolic process (GO:0005975);;	K19891|3.7e-44|ppp:112294008|K19891 glucan endo-1,3-beta-glucosidase 1/2/3 [EC:3.2.1.39] | (RefSeq) glucan endo-1,3-beta-glucosidase 3-like	K19891 | 3.7e-44 | ppp:112294008 | K19891-葡聚糖内切-1,3-β-葡萄糖苷酶1/2/3[EC:3.2.1.39]|（参考顺序）葡聚糖内切-1,3-β-葡萄糖苷酶3-样	Starch and sucrose metabolism (ko00500)	--	--	Glycosyl hydrolases family 17	Glucan endo-1,3-beta-glucosidase, basic vacuolar isoform OS=Hevea brasiliensis OX=3981 GN=HGN1 PE=1 SV=2	G	Carbohydrate transport and metabolism	unnamed protein product [Prunus armeniaca]
PaF106G0100006049.01	5	0	0	65	51	55	0.068814	0	0	0.968432	0.813506	0.761675	1.79378e-12	2.62641	up	[G]	Carbohydrate transport and metabolism	Molecular Function: hydrolase activity, hydrolyzing O-glycosyl compounds (GO:0004553);; Biological Process: carbohydrate metabolic process (GO:0005975);;	K01188|3.7e-63|fve:101292823|K01188 beta-glucosidase [EC:3.2.1.21] | (RefSeq) beta-glucosidase 24-like	K01188 | 3.7e-63 | fve:101292823 | K01188β-葡萄糖苷酶[EC:3.2.1.21]|（参考文献）β-葡萄糖苷酶24	Cyanoamino acid metabolism (ko00460);; Starch and sucrose metabolism (ko00500);; Phenylpropanoid biosynthesis (ko00940)	[G]	Carbohydrate transport and metabolism	Glycosyl hydrolase family 1	Beta-glucosidase 24 OS=Oryza sativa subsp. japonica OX=39947 GN=BGLU24 PE=2 SV=1	G	Carbohydrate transport and metabolism	beta-glucosidase 24-like [Prunus avium]
PaF106G0400018077.01	3086	1947	2599	1034	1098	1051	31.3282	23.7355	27.1896	11.1939	12.8813	10.7558	4.69081e-19	-1.11992	down	[G]	Carbohydrate transport and metabolism	Molecular Function: sucrose alpha-glucosidase activity (GO:0004575);; Biological Process: carbohydrate metabolic process (GO:0005975);; Cellular Component: integral component of membrane (GO:0016021);;	K01193|2.1e-191|pmum:103333352|K01193 beta-fructofuranosidase [EC:3.2.1.26] | (RefSeq) beta-fructofuranosidase, soluble isoenzyme I-like	K01193 | 2.1e-191 | pmum:103333352 | K01193β-呋喃果糖苷酶[EC:3.2.1.26]|（参考Seq）β-呋喃果糖苷酶，可溶性类同工酶	Galactose metabolism (ko00052);; Starch and sucrose metabolism (ko00500)	[G]	Carbohydrate transport and metabolism	Glycosyl hydrolases family 32 N-terminal domain	Beta-fructofuranosidase, soluble isoenzyme I OS=Daucus carota OX=4039 GN=INV*DC4 PE=1 SV=2	G	Carbohydrate transport and metabolism	unnamed protein product [Prunus armeniaca]
PaF106G0600024288.01	96	46	89	31	15	36	1.23767	0.704946	1.18192	0.437752	0.213127	0.467994	0.00252782	-1.05077	down	--	--	Cellular Component: integral component of membrane (GO:0016021);;	K01193|5.7e-26|ats:109747879|K01193 beta-fructofuranosidase [EC:3.2.1.26] | (RefSeq) LOC109747879; beta-fructofuranosidase, insoluble isoenzyme 3-like	K01193 | 5.7e-26 | ats:109747879 | K01193β-呋喃果糖苷酶[EC:3.2.1.26]|（参考顺序）LOC109747879；β-呋喃果糖苷酶，不溶性同功酶3-样	Galactose metabolism (ko00052);; Starch and sucrose metabolism (ko00500)	--	--	Plant protein of unknown function	UPF0481 protein At3g47200 OS=Arabidopsis thaliana OX=3702 GN=At3g47200 PE=2 SV=1	S	Function unknown	PREDICTED: UPF0481 protein At3g47200 [Prunus mume]
PaF106G0100002570.01	21	21	16	103	108	113	0.290141	0.350483	0.230284	1.56953	1.75552	1.58489	7.28917e-13	2.09132	up	--	--	Cellular Component: integral component of membrane (GO:0016021);;	K01193|2.6e-38|ats:109747879|K01193 beta-fructofuranosidase [EC:3.2.1.26] | (RefSeq) LOC109747879; beta-fructofuranosidase, insoluble isoenzyme 3-like	K01193 | 2.6e-38 | ats:109747879 | K01193β-呋喃果糖苷酶[EC:3.2.1.26]|（参考顺序）LOC109747879；β-呋喃果糖苷酶，不溶性同功酶3-样	Galactose metabolism (ko00052);; Starch and sucrose metabolism (ko00500)	--	--	Plant protein of unknown function	Putative UPF0481 protein At3g02645 OS=Arabidopsis thaliana OX=3702 GN=At3g02645 PE=3 SV=1	S	Function unknown	unnamed protein product [Prunus armeniaca]
PaF106G0500018648.01	26	28	27	52	74	68	1.61797	2.07704	1.77259	3.5634	5.5097	4.32104	0.00146672	1.05106	up	[G]	Carbohydrate transport and metabolism	Biological Process: carbohydrate metabolic process (GO:0005975);; Molecular Function: glycogen phosphorylase activity (GO:0008184);; Molecular Function: SHG alpha-glucan phosphorylase activity (GO:0102499);;	K00688|6.3e-21|pavi:110770405|K00688 glycogen phosphorylase [EC:2.4.1.1] | (RefSeq) glycogen phosphorylase 1-like	K00688 | 6.3e-21 | pavi:110770405 | K00688糖原磷酸化酶[EC:2.4.1.1]|（参考文献）糖原磷酸化酶1-样	Starch and sucrose metabolism (ko00500)	[G]	Carbohydrate transport and metabolism	Carbohydrate phosphorylase	Alpha-glucan phosphorylase, H isozyme OS=Vicia faba OX=3906 PE=2 SV=1	G	Carbohydrate transport and metabolism	hypothetical protein PRUPE_1G009700 [Prunus persica]
PaF106G0500018645.01	377	266	341	806	755	707	8.36293	7.06581	7.80273	19.5046	19.589	15.7257	5.69447e-17	1.25599	up	[G]	Carbohydrate transport and metabolism	Biological Process: carbohydrate metabolic process (GO:0005975);; Molecular Function: glycogen phosphorylase activity (GO:0008184);; Molecular Function: pyridoxal phosphate binding (GO:0030170);; Molecular Function: SHG alpha-glucan phosphorylase activity (GO:0102499);;	K00688|4.5e-61|pmum:103324815|K00688 glycogen phosphorylase [EC:2.4.1.1] | (RefSeq) glycogen phosphorylase 1-like isoform X1	K00688 | 4.5e-61 | pmum:103324815 | K00688糖原磷酸化酶[EC:2.4.1.1]|（参考顺序）糖原磷酸化酶1样亚型X1	Starch and sucrose metabolism (ko00500)	[G]	Carbohydrate transport and metabolism	Carbohydrate phosphorylase	Alpha-glucan phosphorylase, H isozyme OS=Vicia faba OX=3906 PE=2 SV=1	G	Carbohydrate transport and metabolism	PREDICTED: alpha-glucan phosphorylase, H isozyme-like [Prunus mume]
PaF106G0600025876.01	6	5	8	66	74	83	0.301509	0.285106	0.453671	3.95038	4.77629	4.61533	5.97013e-14	2.53676	up	--	--	Biological Process: carbohydrate metabolic process (GO:0005975);; Molecular Function: glycogen phosphorylase activity (GO:0008184);; Molecular Function: pyridoxal phosphate binding (GO:0030170);; Molecular Function: SHG alpha-glucan phosphorylase activity (GO:0102499);;	K00688|2.0e-22|pmum:103324815|K00688 glycogen phosphorylase [EC:2.4.1.1] | (RefSeq) glycogen phosphorylase 1-like isoform X1	K00688 | 2.0e-22 | pmum:103324815 | K00688糖原磷酸化酶[EC:2.4.1.1]|（参考顺序）糖原磷酸化酶1样亚型X1	Starch and sucrose metabolism (ko00500)	--	--	Carbohydrate phosphorylase	--	G	Carbohydrate transport and metabolism	unnamed protein product [Prunus armeniaca]
PaF106G0400018078.01	152	108	103	218	313	228	1.90704	1.6025	1.31652	3.04609	4.57245	2.956	8.96153e-06	1.0542	up	[G]	Carbohydrate transport and metabolism	Molecular Function: catalytic activity (GO:0003824);; Biological Process: trehalose biosynthetic process (GO:0005992);;	K01087|8.0e-172|pmum:103333353|K01087 trehalose 6-phosphate phosphatase [EC:3.1.3.12] | (RefSeq) trehalose-phosphate phosphatase A	K01087 | 8.0e-172 | pmum:103333353 | K01087海藻糖6-磷酸磷酸酶[EC:3.1.3.12]|（参考顺序）海藻糖磷酸磷酸酶A	Starch and sucrose metabolism (ko00500)	[G]	Carbohydrate transport and metabolism	Trehalose-phosphatase	Trehalose-phosphate phosphatase A OS=Arabidopsis thaliana OX=3702 GN=TPPA PE=1 SV=1	G	Carbohydrate transport and metabolism	unnamed protein product [Prunus armeniaca]
PaF106G0200010648.01	23	23	41	86	52	78	0.607411	0.718968	1.13556	2.51315	1.60449	2.08945	0.00162861	1.06697	up	[G]	Carbohydrate transport and metabolism	Molecular Function: trehalose-phosphatase activity (GO:0004805);; Biological Process: trehalose biosynthetic process (GO:0005992);;	K01087|2.1e-130|pmum:103333663|K01087 trehalose 6-phosphate phosphatase [EC:3.1.3.12] | (RefSeq) probable trehalose-phosphate phosphatase C	K01087 | 2.1e-130 | pmum:103333663 | K01087海藻糖6-磷酸磷酸酶[EC:3.1.3.12]|（参考顺序）可能的海藻糖磷酸磷酸酶C	Starch and sucrose metabolism (ko00500)	[G]	Carbohydrate transport and metabolism	Trehalose-phosphatase	Probable trehalose-phosphate phosphatase 2 OS=Oryza sativa subsp. japonica OX=39947 GN=TPP2 PE=1 SV=1	G	Carbohydrate transport and metabolism	unnamed protein product [Prunus armeniaca]
PaF106G0200010293.01	694	712	786	1566	1750	1718	8.6973	11.0444	10.2073	22.0086	25.6047	21.7317	1.11332e-24	1.25221	up	[G]	Carbohydrate transport and metabolism	Molecular Function: trehalose-phosphatase activity (GO:0004805);; Biological Process: trehalose biosynthetic process (GO:0005992);;	K01087|8.9e-226|pavi:110764757|K01087 trehalose 6-phosphate phosphatase [EC:3.1.3.12] | (RefSeq) trehalose-phosphate phosphatase A isoform X1	K01087 | 8.9e-226 | pavi:110764757 | K01087海藻糖6-磷酸磷酸酶[EC:3.1.3.12]|（参考Seq）海藻糖磷酸磷酸酶A亚型X1	Starch and sucrose metabolism (ko00500)	[G]	Carbohydrate transport and metabolism	Trehalose-phosphatase	Trehalose-phosphate phosphatase A OS=Arabidopsis thaliana OX=3702 GN=TPPA PE=1 SV=1	G	Carbohydrate transport and metabolism	Haloacid dehalogenase-like hydrolase superfamily protein [Prunus dulcis]
PaF106G0600024634.01	506	410	465	849	859	1186	4.75955	4.60859	4.50726	8.69861	9.78282	11.7408	3.25514e-20	1.11697	up	[T]	Signal transduction mechanisms	Molecular Function: protein kinase activity (GO:0004672);; Molecular Function: ATP binding (GO:0005524);; Cellular Component: integral component of membrane (GO:0016021);; Molecular Function: carbohydrate binding (GO:0030246);;	K01176|1.1e-69|sbi:8065370|K01176 alpha-amylase [EC:3.2.1.1] | (RefSeq) alpha-amylase isozyme 2A	K01176 | 1.1e-69 | sbi:8065370 | K01176α-淀粉酶[EC:3.2.1.1]|（参考顺序）α-淀粉酶同工酶2A	Starch and sucrose metabolism (ko00500)	--	--	Legume lectin domain	L-type lectin-domain containing receptor kinase IV.1 OS=Arabidopsis thaliana OX=3702 GN=LECRK41 PE=2 SV=1	T	Signal transduction mechanisms	PREDICTED: L-type lectin-domain containing receptor kinase IV.1-like [Prunus mume]
PaF106G0300011965.01	3639	3002	3231	556	653	779	39.2682	38.7648	35.962	6.52909	8.21579	8.4123	9.55857e-109	-2.18545	down	[G]	Carbohydrate transport and metabolism	Biological Process: polysaccharide catabolic process (GO:0000272);; Molecular Function: beta-amylase activity (GO:0016161);; Molecular Function: amylopectin maltohydrolase activity (GO:0102229);;	K01177|1.1e-300|pper:18782689|K01177 beta-amylase [EC:3.2.1.2] | (RefSeq) beta-amylase	K01177 | 1.1e-300 | pper:18782689 | K01177β-淀粉酶[EC:3.2.1.2]|（参考顺序）β-淀粉酶	Starch and sucrose metabolism (ko00500)	--	--	Glycosyl hydrolase family 14	Beta-amylase OS=Trifolium repens OX=3899 GN=BMY1 PE=2 SV=1	G	Carbohydrate transport and metabolism	unnamed protein product [Prunus armeniaca]
PaF106G0100001047.01	20	2	8	60	54	79	0.779402	0.096407	0.317318	2.63157	2.52219	3.19919	2.12262e-06	1.76347	up	--	--	Molecular Function: iron ion binding (GO:0005506);; Biological Process: lipid biosynthetic process (GO:0008610);; Cellular Component: integral component of membrane (GO:0016021);; Molecular Function: oxidoreductase activity (GO:0016491);;	K15746|3.3e-61|pper:18787302|K15746 beta-carotene 3-hydroxylase [EC:1.14.15.24] | (RefSeq) beta-carotene hydroxylase 2, chloroplastic	K15746 | 3.3e-61 | pper:18787302 | K15746β-胡萝卜素3-羟化酶[EC:1.14.15.24]|（参考顺序）β-胡萝卜素羟化酶2，叶绿体	Carotenoid biosynthesis (ko00906)	--	--	--	Beta-carotene hydroxylase 2, chloroplastic OS=Capsicum annuum OX=4072 GN=CA2 PE=1 SV=2	S	Function unknown	unnamed protein product [Prunus armeniaca]
PaF106G0800031024.01	61	55	67	163	132	213	0.874165	0.945473	0.988579	2.54828	2.20572	3.05951	7.7817e-09	1.37866	up	[G]	Carbohydrate transport and metabolism	Molecular Function: UDP-glycosyltransferase activity (GO:0008194);;	K14595|1.0e-271|pper:18766834|K14595 abscisate beta-glucosyltransferase [EC:2.4.1.263] | (RefSeq) abscisate beta-glucosyltransferase	K14595 | 1.0e-271 | pper:18766834 | K14595-横坐标β-葡萄糖基转移酶[EC:2.4.1.263]|（参考顺序）横坐标β-葡萄糖基转移酶	Carotenoid biosynthesis (ko00906)	[GC]	Carbohydrate transport and metabolism;; Energy production and conversion	UDP-glucoronosyl and UDP-glucosyl transferase	Abscisate beta-glucosyltransferase OS=Phaseolus angularis OX=3914 GN=AOG PE=1 SV=1	--	--	unnamed protein product [Prunus armeniaca]
PaF106G0100003916.01	2042	1734	1620	529	587	858	25.2848	25.6906	20.6909	7.12219	8.4858	10.63	1.92432e-23	-1.33159	down	[G]	Carbohydrate transport and metabolism	Molecular Function: cellulase activity (GO:0008810);; Biological Process: cellulose catabolic process (GO:0030245);;	K01179|1.4e-292|pmum:103321421|K01179 endoglucanase [EC:3.2.1.4] | (RefSeq) endoglucanase 8	K01179 | 1.4e-292 | pmum:103321421 | K01179内切葡聚糖酶[EC:3.2.1.4]|（参考顺序）内切葡聚糖酶8	Starch and sucrose metabolism (ko00500)	--	--	Glycosyl hydrolase family 9	Endoglucanase 8 OS=Arabidopsis thaliana OX=3702 GN=CEL1 PE=2 SV=1	G	Carbohydrate transport and metabolism	PREDICTED: endoglucanase 8 [Prunus mume]
PaF106G0600023075.01	803	986	951	57	214	125	20.4624	30.0701	24.9976	1.57841	6.35749	3.1773	1.62063e-05	-1.63785	down	[IQR]	Lipid transport and metabolism;; Secondary metabolites biosynthesis, transport and catabolism;; General function prediction only	Molecular Function: oxidoreductase activity (GO:0016491);;	K09841|4.3e-78|nto:104121195|K09841 xanthoxin dehydrogenase [EC:1.1.1.288] | (RefSeq) xanthoxin dehydrogenase-like	K09841 | 4.3e-78 | nto:104121195 | K09841黄毒素脱氢酶[EC:1.1.1.288]|（参考文献）类黄毒素脱氢酶	Carotenoid biosynthesis (ko00906)	[R]	General function prediction only	Enoyl-(Acyl carrier protein) reductase	Secoisolariciresinol dehydrogenase (Fragment) OS=Forsythia intermedia OX=55183 PE=1 SV=1	Q	Secondary metabolites biosynthesis, transport and catabolism	unnamed protein product [Prunus armeniaca]
PaF106G0200009421.01	2492	2347	2545	994	1005	1135	17.4989	19.6103	18.4477	7.71778	8.26935	8.05022	1.83143e-35	-1.13377	down	[G]	Carbohydrate transport and metabolism	Biological Process: carbohydrate metabolic process (GO:0005975);; Molecular Function: pullulanase activity (GO:0051060);;	K01214|7.4e-27|smo:SELMODRAFT_106218|K01214 isoamylase [EC:3.2.1.68] | (RefSeq) hypothetical protein	K01214 | 7.4e-27 | smo:SELMODRAFT | U 106218 | K01214异淀粉酶[EC:3.2.1.68]|（参考顺序）假设蛋白质	Starch and sucrose metabolism (ko00500)	[G]	Carbohydrate transport and metabolism	Pullulanase N2 domain	Pullulanase 1, chloroplastic OS=Arabidopsis thaliana OX=3702 GN=PU1 PE=1 SV=2	G	Carbohydrate transport and metabolism	unnamed protein product [Prunus armeniaca]
PaF106G0800031073.01	98	77	68	112	340	265	1.40252	1.3235	1.00198	1.74764	5.69459	3.83177	8.17849e-06	1.35141	up	[QV]	Secondary metabolites biosynthesis, transport and catabolism;; Defense mechanisms	Molecular Function: monooxygenase activity (GO:0004497);; Molecular Function: iron ion binding (GO:0005506);; Cellular Component: integral component of membrane (GO:0016021);; Molecular Function: oxidoreductase activity, acting on paired donors, with incorporation or reduction of molecular oxygen (GO:0016705);; Molecular Function: heme binding (GO:0020037);;	K09843|2.4e-176|pmum:103335270|K09843 (+)-abscisic acid 8'-hydroxylase [EC:1.14.14.137] | (RefSeq) abscisic acid 8'-hydroxylase 4	K09843 | 2.4e-176 | pmum:103335270 | K09843（+）-脱落酸8'-羟化酶[EC:1.14.14.137]|（参考顺序）脱落酸8'-羟化酶4	Carotenoid biosynthesis (ko00906)	[QI]	Secondary metabolites biosynthesis, transport and catabolism;; Lipid transport and metabolism	Cytochrome P450	Abscisic acid 8'-hydroxylase 4 OS=Arabidopsis thaliana OX=3702 GN=CYP707A4 PE=2 SV=2	Q	Secondary metabolites biosynthesis, transport and catabolism	unnamed protein product [Prunus armeniaca]
PaF106G0800031731.01	78	39	29	118	129	81	1.26643	0.756069	0.484512	2.09197	2.4499	1.30788	0.00257371	1.00956	up	[HR]	Coenzyme transport and metabolism;; General function prediction only	Biological Process: sucrose metabolic process (GO:0005985);; Molecular Function: sucrose synthase activity (GO:0016157);; Molecular Function: sucrose-phosphate synthase activity (GO:0046524);;	K00696|4.2e-55|pavi:110746034|K00696 sucrose-phosphate synthase [EC:2.4.1.14] | (RefSeq) probable sucrose-phosphate synthase 2	K00696 | 4.2e-55 | pavi:110746034 | K00696蔗糖磷酸合酶[EC:2.4.1.14]|（参考序列）可能的蔗糖磷酸合酶2	Starch and sucrose metabolism (ko00500)	[M]	Cell wall/membrane/envelope biogenesis	--	Probable sucrose-phosphate synthase 1 OS=Oryza sativa subsp. indica OX=39946 GN=SPS1 PE=2 SV=2	M	Cell wall/membrane/envelope biogenesis	unnamed protein product [Prunus armeniaca]
