# Supplementary material for: Mining for genes related to pistil abortion in Prunus sibirica L
Source: PeerJ. 2022 Nov 15;10:e14366. doi: 10.7717/peerj.14366 (PMC9673769; doi:10.7717/peerj.14366)
Supplement: Table S19 [file peerj-10-14366-s019.xlsx]

## Sheet: Sheet1
Table S19 DEGs related to phytohormone biosynthesis and signaling pathways
#ID	NPt1_Count	NPt2_Count	NPt3_Count	APt1_Count	APt2_Count	APt3_Count	NPt1_FPKM	NPt2_FPKM	NPt3_FPKM	APt1_FPKM	APt2_FPKM	APt3_FPKM	FDR	log2FC	regulated	COG_class	COG_class_annotation	GO_annotation	KEGG_annotation	KEGG_pathway_annotation	KOG_class	KOG_class_annotation	Pfam_annotation	Pfam_annotation	Swiss-Prot_annotation	eggNOG_class	eggNOG_class_annotation	NR_annotation
PaF106G0800030640.01	375	404	345	39	105	93	4.51149	5.81816	4.2824	0.50972	1.47516	1.11081	5.6944e-13	-1.87038	down	--	--	Biological Process: amino acid transmembrane transport (GO:0003333);; Cellular Component: plasma membrane (GO:0005886);; Molecular Function: amino acid transmembrane transporter activity (GO:0015171);; Cellular Component: integral component of membrane (GO:0016021);;	K13946|1.0e-287|pmum:103334805|K13946 auxin influx carrier (AUX1 LAX family) | (RefSeq) auxin transporter-like protein 2	Plant hormone signal transduction (ko04075)	[E]	Amino acid transport and metabolism	Transmembrane amino acid transporter protein		Auxin transporter-like protein 2 OS=Arabidopsis thaliana OX=3702 GN=LAX2 PE=2 SV=1	E	Amino acid transport and metabolism	unnamed protein product [Prunus armeniaca]
PaF106G0600022803.01	337	219	309	96	115	93	4.42914	3.44628	4.18754	1.37449	1.76664	1.21347	2.55221e-09	-1.27833	down	--	--	Cellular Component: integral component of membrane (GO:0016021);;	K13946|1.8e-12|ppp:112289353|K13946 auxin influx carrier (AUX1 LAX family) | (RefSeq) auxin transporter protein 1-like	Plant hormone signal transduction (ko04075)	[E]	Amino acid transport and metabolism	Transmembrane amino acid transporter protein		GABA transporter 1 OS=Arabidopsis thaliana OX=3702 GN=GAT1 PE=1 SV=1	E	Amino acid transport and metabolism	unnamed protein product [Prunus armeniaca]
PaF106G0800031588.01	688	513	499	227	234	288	27.5009	24.5419	20.5603	9.87716	10.8872	11.4961	9.45253e-12	-1.04682	down	--	--	Biological Process: response to auxin (GO:0009733);;	K14488|3.4e-73|pper:18768105|K14488 SAUR family protein | (RefSeq) auxin-responsive protein SAUR50	Plant hormone signal transduction (ko04075)	--	--	Auxin responsive protein		Auxin-responsive protein SAUR50 OS=Arabidopsis thaliana OX=3702 GN=SAUR50 PE=1 SV=1	S	Function unknown	auxin-responsive protein SAUR50 [Prunus persica]
PaF106G0600022655.01	93	141	149	327	249	375	4.43696	8.06803	7.33109	17.0568	13.9501	17.9947	4.82468e-08	1.24119	up	--	--	Biological Process: response to auxin (GO:0009733);;	K14488|8.1e-60|pavi:110755469|K14488 SAUR family protein | (RefSeq) auxin-responsive protein SAUR50-like	Plant hormone signal transduction (ko04075)	--	--	Auxin responsive protein		Auxin-responsive protein SAUR50 OS=Arabidopsis thaliana OX=3702 GN=SAUR50 PE=1 SV=1	S	Function unknown	unnamed protein product [Prunus armeniaca]
PaF106G0800029443.01	1170	1113	1292	2419	2390	2782	13.6724	15.8501	16.0818	32.2481	33.7015	34.6945	8.12245e-35	1.15164	up	[H]	Coenzyme transport and metabolism	Biological Process: biological_process (GO:0008150);; Biological Process: response to radiation (GO:0009314);; Biological Process: response to light stimulus (GO:0009416);; Biological Process: response to abiotic stimulus (GO:0009628);; Biological Process: response to endogenous stimulus (GO:0009719);; Biological Process: response to hormone (GO:0009725);; Biological Process: response to auxin (G…	K14487|0.0e+00|pmum:103333903|K14487 auxin responsive GH3 gene family | (RefSeq) putative indole-3-acetic acid-amido synthetase GH3.9	Plant hormone signal transduction (ko04075)	--	--	GH3 auxin-responsive promoter		Putative indole-3-acetic acid-amido synthetase GH3.9 OS=Arabidopsis thaliana OX=3702 GN=GH3.9 PE=2 SV=1	S	Function unknown	unnamed protein product [Prunus armeniaca]
PaF106G0700027134.01	96	66	95	335	342	371	2.73556	2.23544	2.8079	10.4713	11.4594	10.6474	5.23621e-27	1.98395	up	--	--	Biological Process: response to auxin (GO:0009733);;	K14488|9.6e-58|pper:18769935|K14488 SAUR family protein | (RefSeq) auxin-responsive protein SAUR50	Plant hormone signal transduction (ko04075)	--	--	Auxin responsive protein		Auxin-responsive protein SAUR50 OS=Arabidopsis thaliana OX=3702 GN=SAUR50 PE=1 SV=1	S	Function unknown	auxin-responsive protein SAUR50 [Prunus persica]
PaF106G0800032694.01	290	313	261	20	69	53	3.3495	4.32148	3.11065	0.244121	0.930004	0.603861	3.53876e-13	-2.08005	down	--	--	Cellular Component: plasma membrane (GO:0005886);; Biological Process: auxin-activated signaling pathway (GO:0009734);; Biological Process: negative regulation of ethylene-activated signaling pathway (GO:0010105);; Biological Process: basipetal auxin transport (GO:0010540);; Cellular Component: integral component of membrane (GO:0016021);; Biological Process: root hair elongation (GO:0048767);; B…	K13947|2.7e-305|pper:18766896|K13947 auxin efflux carrier family protein | (RefSeq) auxin efflux carrier component 6	--	--	--	Membrane transport protein		Auxin efflux carrier component 6 OS=Arabidopsis thaliana OX=3702 GN=PIN6 PE=2 SV=2	P	Inorganic ion transport and metabolism	auxin efflux carrier component 6 [Prunus persica]
PaF106G0700027940.01	1935	1401	1906	430	345	438	28.7575	24.9152	29.2101	6.95184	5.98252	6.51149	1.01944e-60	-1.96309	down	[R]	General function prediction only	Cellular Component: endoplasmic reticulum (GO:0005783);; Biological Process: auxin metabolic process (GO:0009850);; Molecular Function: IAA-Ala conjugate hydrolase activity (GO:0010179);; Molecular Function: hydrolase activity (GO:0016787);;	K14664|3.0e-249|pmum:103341724|K14664 IAA-amino acid hydrolase [EC:3.5.1.-] | (RefSeq) IAA-amino acid hydrolase ILR1-like 3	--	--	--	Peptidase family M20/M25/M40		IAA-amino acid hydrolase ILR1-like 3 OS=Oryza sativa subsp. japonica OX=39947 GN=ILL3 PE=2 SV=1	S	Function unknown	unnamed protein product [Prunus armeniaca]
PaF106G0300012115.01	18971	10520	19751	4369	3546	4750	271.711	180.308	291.791	68.1053	59.2674	68.1102	3.55057e-35	-1.78443	down	--	--	Molecular Function: hydrolase activity, acting on ester bonds (GO:0016788);;	K10691|1.2e-34|ats:109762802|K10691 E3 ubiquitin-protein ligase UBR4 [EC:2.3.2.27] | (RefSeq) LOC109762802; auxin transport protein BIG	--	--	--	GDSL-like Lipase/Acylhydrolase		GDSL esterase/lipase At2g04570 OS=Arabidopsis thaliana OX=3702 GN=At2g04570 PE=2 SV=1	I	Lipid transport and metabolism	unnamed protein product [Prunus armeniaca]
PaF106G0400017695.01	8202	4183	7979	1538	1593	2086	145.755	88.9537	146.266	29.7314	33.0268	37.1053	9.79292e-31	-1.77926	down	[IR]	Lipid transport and metabolism;; General function prediction only	Molecular Function: hydrolase activity, acting on ester bonds (GO:0016788);;	K10691|1.5e-65|ats:109762802|K10691 E3 ubiquitin-protein ligase UBR4 [EC:2.3.2.27] | (RefSeq) LOC109762802; auxin transport protein BIG	--	--	--	GDSL-like Lipase/Acylhydrolase		GDSL esterase/lipase At5g45950 OS=Arabidopsis thaliana OX=3702 GN=At5g45950 PE=2 SV=1	I	Lipid transport and metabolism	PREDICTED: GDSL esterase/lipase At5g45950 [Prunus mume]
PaF106G0700027938.01	2099	2073	2465	891	684	1094	26.9796	31.8901	32.6895	12.4583	10.2542	14.0765	5.03023e-21	-1.20556	down	[R]	General function prediction only	Cellular Component: endoplasmic reticulum (GO:0005783);; Biological Process: auxin metabolic process (GO:0009850);; Molecular Function: IAA-Ala conjugate hydrolase activity (GO:0010179);; Molecular Function: hydrolase activity (GO:0016787);;	K14664|1.7e-246|pmum:103341727|K14664 IAA-amino acid hydrolase [EC:3.5.1.-] | (RefSeq) IAA-amino acid hydrolase ILR1-like	--	--	--	Peptidase family M20/M25/M40		IAA-amino acid hydrolase ILR1 OS=Arabidopsis thaliana OX=3702 GN=ILR1 PE=1 SV=2	S	Function unknown	PREDICTED: IAA-amino acid hydrolase ILR1-like [Prunus mume]
PaF106G0700026911.01	6258	4052	4762	1860	2178	2074	70.1675	52.9463	54.0149	23.0251	28.8982	23.0245	2.77831e-22	-1.16371	down	--	--	Cellular Component: integral component of membrane (GO:0016021);; Biological Process: transmembrane transport (GO:0055085);;	K24139|4.2e-226|pmum:103340458|K24139 auxin efflux carrier family protein | (RefSeq) uncharacterized transporter YBR287W	--	[S]	Function unknown	Membrane transport protein		Protein PIN-LIKES 5 OS=Arabidopsis thaliana OX=3702 GN=PILS5 PE=2 SV=1	S	Function unknown	unnamed protein product [Prunus armeniaca]
PaF106G0800029715.01	249	189	215	101	68	84	2.97834	2.83215	2.77342	1.38959	1.10104	1.15636	2.1091e-07	-1.15639	down	--	--	Biological Process: auxin-activated signaling pathway (GO:0009734);; Biological Process: phloem or xylem histogenesis (GO:0010087);; Biological Process: leaf vascular tissue pattern formation (GO:0010305);;	--	--	--	--	Auxin canalisation		VAN3-binding protein OS=Arabidopsis thaliana OX=3702 GN=VAB PE=1 SV=1	S	Function unknown	unnamed protein product [Prunus armeniaca]
PaF106G0800031599.01	153	93	69	234	229	291	3.85337	2.89354	1.65102	6.19651	6.31591	7.13424	6.62819e-07	1.20513	up	--	--	Biological Process: response to auxin (GO:0009733);;	K14488|1.1e-46|pavi:110745503|K14488 SAUR family protein | (RefSeq) indole-3-acetic acid-induced protein ARG7-like	Plant hormone signal transduction (ko04075)	--	--	Auxin responsive protein		Indole-3-acetic acid-induced protein ARG7 OS=Vigna radiata var. radiata OX=3916 GN=ARG7 PE=2 SV=1	--	--	indole-3-acetic acid-induced protein ARG7 [Prunus persica]
PaF106G0800031608.01	393	237	278	646	817	788	7.47248	5.92647	5.7109	12.5678	17.0397	14.0351	4.78131e-16	1.34389	up	--	--	Biological Process: response to auxin (GO:0009733);;	K14488|1.8e-47|pavi:110745503|K14488 SAUR family protein | (RefSeq) indole-3-acetic acid-induced protein ARG7-like	Plant hormone signal transduction (ko04075)	--	--	Auxin responsive protein		Indole-3-acetic acid-induced protein ARG7 OS=Vigna radiata var. radiata OX=3916 GN=ARG7 PE=2 SV=1	--	--	indole-3-acetic acid-induced protein ARG7 [Prunus persica]
PaF106G0800031596.01	95	73	69	234	285	293	3.57314	3.26743	2.6646	9.59725	12.5551	11.0822	8.29285e-17	1.71642	up	--	--	Biological Process: response to auxin (GO:0009733);;	K14488|2.1e-69|pmum:103335786|K14488 SAUR family protein | (RefSeq) indole-3-acetic acid-induced protein ARG7-like	Plant hormone signal transduction (ko04075)	--	--	Auxin responsive protein		Indole-3-acetic acid-induced protein ARG7 OS=Vigna radiata var. radiata OX=3916 GN=ARG7 PE=2 SV=1	S	Function unknown	PREDICTED: indole-3-acetic acid-induced protein ARG7-like [Prunus mume]
PaF106G0200007167.01	154	105	107	0	0	0	14.6036	11.8353	10.4255	0	0	0	1.14275e-31	-4.05461	down	--	--	Molecular Function: DNA binding (GO:0003677);; Cellular Component: nucleus (GO:0005634);; Biological Process: regulation of transcription, DNA-templated (GO:0006355);; Biological Process: response to hormone (GO:0009725);;	K14486|5.3e-06|bdi:100824752|K14486 auxin response factor | (RefSeq) auxin response factor 11 isoform X1	Plant hormone signal transduction (ko04075)	--	--	Auxin response factor		Auxin response factor 22 OS=Oryza sativa subsp. japonica OX=39947 GN=ARF22 PE=2 SV=1	K	Transcription	PREDICTED: auxin response factor [Prunus dulcis]
PaF106G0800030462.01	0	0	0	193	326	303	0	0	0	1.3726	2.50062	1.9791	1.30777e-58	5.20166	up	--	--	Molecular Function: nucleotide binding (GO:0000166);; Biological Process: response to reactive oxygen species (GO:0000302);; Biological Process: response to acid chemical (GO:0001101);; Biological Process: immune system process (GO:0002376);; Molecular Function: molecular_function (GO:0003674);; Molecular Function: binding (GO:0005488);; Cellular Component: cellular_component (GO:0005575);; Cellu…	K16226|5.2e-16|bna:106416466|K16226 disease resistance protein RPS4 | (RefSeq) disease resistance protein RPS4-like	Plant-pathogen interaction (ko04626)	--	--	Leucine rich repeat		--	T	Signal transduction mechanisms	Hypothetical predicted protein, partial [Prunus dulcis]
PaF106G0700027963.01	48	50	42	106	122	87	1.19933	1.49722	1.06782	2.8906	3.57274	2.17667	0.000329725	1.05844	up	[R]	General function prediction only	Biological Process: cytokinin biosynthetic process (GO:0009691);; Molecular Function: hydrolase activity (GO:0016787);;	K22522|7.4e-89|pmum:103341706|K22522 cytokinin riboside 5'-monophosphate phosphoribohydrolase [EC:3.2.2.-] | (RefSeq) cytokinin riboside 5'-monophosphate phosphoribohydrolase LOG7	--	--	--	Possible lysine decarboxylase		Cytokinin riboside 5'-monophosphate phosphoribohydrolase LOG7 OS=Arabidopsis thaliana OX=3702 GN=LOG7 PE=1 SV=2	G	Carbohydrate transport and metabolism	PREDICTED: cytokinin riboside 5'-monophosphate phosphoribohydrolase LOG7 [Prunus mume]
PaF106G0300011576.01	231	67	199	41	41	43	3.68735	1.24538	3.21526	0.622213	0.709989	0.59155	5.02799e-06	-1.45936	down	[G]	Carbohydrate transport and metabolism	Molecular Function: UDP-glycosyltransferase activity (GO:0008194);; Cellular Component: intracellular membrane-bounded organelle (GO:0043231);;	K23452|1.9e-70|bna:106397643|K23452 UDP-glucosyltransferase 85A [EC:2.4.1.-] | (RefSeq) UDP-glycosyltransferase 85A2 isoform X2	Zeatin biosynthesis (ko00908)	[GC]	Carbohydrate transport and metabolism;; Energy production and conversion	UDP-glucoronosyl and UDP-glucosyl transferase		UDP-glycosyltransferase 83A1 OS=Arabidopsis thaliana OX=3702 GN=UGT83A1 PE=2 SV=1	--	--	PREDICTED: UDP-glycosyltransferase 83A1-like [Prunus mume]
PaF106G0300012326.01	90	47	44	178	148	209	1.11913	0.88889	0.432974	3.21169	1.65494	3.39445	3.52142e-08	1.4394	up	--	--	Molecular Function: UDP-glycosyltransferase activity (GO:0008194);;	K23452|1.1e-149|eus:EUTSA_v10009957mg|K23452 UDP-glucosyltransferase 85A [EC:2.4.1.-] | (RefSeq) hypothetical protein	Zeatin biosynthesis (ko00908)	[GC]	Carbohydrate transport and metabolism;; Energy production and conversion	UDP-glucoronosyl and UDP-glucosyl transferase		7-deoxyloganetin glucosyltransferase OS=Catharanthus roseus OX=4058 GN=UGT85A23 PE=1 SV=1	--	--	UDP-glucosyl transferase 85A2, partial [Prunus dulcis]
PaF106G0600022161.01	478	266	474	24	15	26	7.39084	4.91579	7.55891	0.397867	0.265695	0.391986	2.10075e-48	-3.57829	down	[G]	Carbohydrate transport and metabolism	Molecular Function: UDP-glycosyltransferase activity (GO:0008194);; Cellular Component: intracellular membrane-bounded organelle (GO:0043231);; Molecular Function: quercetin 3-O-glucosyltransferase activity (GO:0080043);; Molecular Function: quercetin 7-O-glucosyltransferase activity (GO:0080044);;	K13493|1.7e-108|eus:EUTSA_v10013500mg|K13493 cytokinin-N-glucosyltransferase [EC:2.4.1.-] | (RefSeq) hypothetical protein	Zeatin biosynthesis (ko00908)	[GC]	Carbohydrate transport and metabolism;; Energy production and conversion	UDP-glucoronosyl and UDP-glucosyl transferase		UDP-glucose iridoid glucosyltransferase OS=Catharanthus roseus OX=4058 GN=UGT76A2 PE=1 SV=1	--	--	unnamed protein product [Prunus armeniaca]
PaF106G0200009897.01	297	239	245	46	18	74	4.44786	4.29868	3.7758	0.751353	0.302818	1.10347	3.28255e-13	-2.04094	down	[G]	Carbohydrate transport and metabolism	Molecular Function: UDP-glycosyltransferase activity (GO:0008194);;	K13493|2.2e-113|bna:106432180|K13493 cytokinin-N-glucosyltransferase [EC:2.4.1.-] | (RefSeq) UDP-glycosyltransferase 76C2	Zeatin biosynthesis (ko00908)	[GC]	Carbohydrate transport and metabolism;; Energy production and conversion	UDP-glucoronosyl and UDP-glucosyl transferase		UDP-glycosyltransferase 76F1 OS=Arabidopsis thaliana OX=3702 GN=UGT76F1 PE=2 SV=1	--	--	PREDICTED: UDP-glycosyltransferase 76F1-like [Prunus mume]
PaF106G0600022158.01	614	397	468	96	99	184	7.76236	5.99883	6.098	1.31554	1.45583	2.32136	1.56174e-17	-1.73675	down	[G]	Carbohydrate transport and metabolism	Molecular Function: UDP-glycosyltransferase activity (GO:0008194);; Cellular Component: intracellular membrane-bounded organelle (GO:0043231);; Molecular Function: quercetin 3-O-glucosyltransferase activity (GO:0080043);; Molecular Function: quercetin 7-O-glucosyltransferase activity (GO:0080044);;	K13493|5.4e-110|brp:103846928|K13493 cytokinin-N-glucosyltransferase [EC:2.4.1.-] | (RefSeq) UDP-glycosyltransferase 76C2	Zeatin biosynthesis (ko00908)	[GC]	Carbohydrate transport and metabolism;; Energy production and conversion	UDP-glucoronosyl and UDP-glucosyl transferase		UDP-glucose iridoid glucosyltransferase OS=Catharanthus roseus OX=4058 GN=UGT76A2 PE=1 SV=1	--	--	PREDICTED: UDP-glycosyltransferase 76E2-like isoform X1 [Prunus mume]
PaF106G0600022159.01	473	305	348	129	117	104	8.29301	6.39994	6.29099	2.4586	2.3862	1.82532	3.35294e-13	-1.45685	down	--	--	Molecular Function: UDP-glycosyltransferase activity (GO:0008194);;	K13493|3.2e-25|ath:AT5G05870|K13493 cytokinin-N-glucosyltransferase [EC:2.4.1.-] | (RefSeq) UGT76C1; UDP-glucosyl transferase 76C1	Zeatin biosynthesis (ko00908)	[GC]	Carbohydrate transport and metabolism;; Energy production and conversion	UDP-glucoronosyl and UDP-glucosyl transferase		UDP-glycosyltransferase 76E4 OS=Arabidopsis thaliana OX=3702 GN=UGT76E4 PE=2 SV=1	--	--	UDP-glycosyltransferase 76E2-like isoform X1 [Prunus avium]
PaF106G0400016209.01	452	551	649	233	205	245	5.39297	7.88414	8.15251	3.09882	2.92307	3.0266	8.22649e-10	-1.1248	down	[J]	Translation, ribosomal structure and biogenesis	Molecular Function: ATP binding (GO:0005524);; Cellular Component: mitochondrion (GO:0005739);; Biological Process: tRNA modification (GO:0006400);; Biological Process: cytokinin biosynthetic process (GO:0009691);; Molecular Function: tRNA dimethylallyltransferase activity (GO:0052381);;	K00791|1.7e-252|pper:18778576|K00791 tRNA dimethylallyltransferase [EC:2.5.1.75] | (RefSeq) tRNA dimethylallyltransferase 9 isoform X1	Zeatin biosynthesis (ko00908)	[J]	Translation, ribosomal structure and biogenesis	IPP transferase		tRNA dimethylallyltransferase 9 OS=Arabidopsis thaliana OX=3702 GN=IPT9 PE=2 SV=1	J	Translation, ribosomal structure and biogenesis	unnamed protein product [Prunus armeniaca]
PaF106G0200007121.01	72	72	62	267	160	266	0.880551	1.05023	0.777807	3.57425	2.30011	3.28384	7.15657e-12	1.62424	up	[C]	Energy production and conversion	Biological Process: cytokinin metabolic process (GO:0009690);; Molecular Function: cytokinin dehydrogenase activity (GO:0019139);; Molecular Function: FAD binding (GO:0071949);;	K00279|1.5e-311|pper:18784595|K00279 cytokinin dehydrogenase [EC:1.5.99.12] | (RefSeq) cytokinin dehydrogenase 6	Zeatin biosynthesis (ko00908)	[C]	Energy production and conversion	Cytokinin dehydrogenase 1, FAD and cytokinin binding		Cytokinin dehydrogenase 6 OS=Arabidopsis thaliana OX=3702 GN=CKX6 PE=2 SV=2	C	Energy production and conversion	unnamed protein product [Prunus armeniaca]
PaF106G0300014127.01	251	194	148	4	3	12	2.2646	2.13633	1.45047	0.029972	0.019201	0.098054	2.24033e-32	-3.64503	down	--	--	Molecular Function: DNA binding (GO:0003677);; Molecular Function: transcription factor activity, sequence-specific DNA binding (GO:0003700);; Cellular Component: nucleus (GO:0005634);;	K09285|1.3e-175|pmum:103327638|K09285 AP2-like factor, ANT lineage | (RefSeq) AP2-like ethylene-responsive transcription factor AIL1	--	--	--	AP2 domain		AP2-like ethylene-responsive transcription factor AIL1 OS=Arabidopsis thaliana OX=3702 GN=AIL1 PE=2 SV=1	K	Transcription	PREDICTED: AP2-like ethylene-responsive transcription factor AIL1 [Prunus mume]
PaF106G0100004904.01	526	583	437	98	129	186	5.03751	6.77421	4.22257	0.952697	1.34405	1.73264	2.50007e-16	-1.69197	down	--	--	Molecular Function: DNA binding (GO:0003677);; Molecular Function: transcription factor activity, sequence-specific DNA binding (GO:0003700);; Cellular Component: nucleus (GO:0005634);;	K09285|0.0e+00|pper:18788684|K09285 AP2-like factor, ANT lineage | (RefSeq) AP2-like ethylene-responsive transcription factor ANT	--	--	--	AP2 domain		AP2-like ethylene-responsive transcription factor CRL5 OS=Oryza sativa subsp. japonica OX=39947 GN=CRL5 PE=2 SV=1	K	Transcription	unnamed protein product [Prunus armeniaca]
PaF106G0300013421.01	1674	961	1588	415	421	546	24.5119	15.8937	26.1386	6.80248	8.09765	7.89879	1.42649e-21	-1.44864	down	--	--	Molecular Function: DNA binding (GO:0003677);; Molecular Function: transcription factor activity, sequence-specific DNA binding (GO:0003700);; Cellular Component: nucleus (GO:0005634);;	K09285|1.9e-122|pper:18784307|K09285 AP2-like factor, ANT lineage | (RefSeq) AP2-like ethylene-responsive transcription factor At1g16060	--	--	--	AP2 domain		AP2-like ethylene-responsive transcription factor At1g16060 OS=Arabidopsis thaliana OX=3702 GN=At1g16060 PE=2 SV=1	K	Transcription	unnamed protein product [Prunus armeniaca]
PaF106G0600024409.01	737	614	485	1168	1196	1368	9.89103	9.95141	6.80362	17.5261	18.9539	18.411	1.72465e-14	1.07173	up	--	--	Molecular Function: DNA binding (GO:0003677);; Molecular Function: transcription factor activity, sequence-specific DNA binding (GO:0003700);; Cellular Component: nucleus (GO:0005634);;	K09284|2.8e-255|pmum:103337713|K09284 AP2-like factor, euAP2 lineage | (RefSeq) AP2-like ethylene-responsive transcription factor TOE3 isoform X1	--	--	--	AP2 domain		APETALA2-like protein 3 OS=Oryza sativa subsp. japonica OX=39947 GN=AP2-3 PE=1 SV=1	K	Transcription	unnamed protein product [Prunus armeniaca]
PaF106G0100004288.01	54	51	58	323	387	277	0.797529	0.90049	0.877882	5.19145	6.66716	4.09815	1.62773e-26	2.41915	up	--	--	Biological Process: biological_process (GO:0008150);; Biological Process: response to external stimulus (GO:0009605);; Biological Process: response to biotic stimulus (GO:0009607);; Biological Process: response to bacterium (GO:0009617);; Biological Process: response to endogenous stimulus (GO:0009719);; Biological Process: response to ethylene (GO:0009723);; Biological Process: response to hormo…	K12173|3.8e-44|gmx:100794341|K12173 BRCA1-A complex subunit BRE | (RefSeq) BRISC and BRCA1-A complex member 2	Homologous recombination (ko03440)	--	--	Thaumatin family		Thaumatin-like protein 1 OS=Arabidopsis thaliana OX=3702 GN=TLP1 PE=2 SV=1	T	Signal transduction mechanisms	THAUMATIN-LIKE PROTEIN 1 [Prunus dulcis]
PaF106G0500020594.01	239	347	304	16	21	44	6.72084	11.7009	8.83342	0.46887	0.668936	1.23509	1.20082e-25	-2.85259	down	--	--	--	K03860|6.5e-09|nnu:104608881|K03860 phosphatidylinositol N-acetylglucosaminyltransferase subunit Q | (RefSeq) N-acetylglucosaminyl-phosphatidylinositol biosynthetic protein gpi1-like	Glycosylphosphatidylinositol (GPI)-anchor biosynthesis (ko00563)	--	--	Gibberellin regulated protein		Snakin-2 OS=Solanum tuberosum OX=4113 GN=SN2 PE=1 SV=1	S	Function unknown	unnamed protein product [Prunus armeniaca]
PaF106G0700027122.01	27	20	45	93	81	118	0.867371	0.760637	1.50618	3.30462	3.11326	3.87774	6.55609e-06	1.40019	up	--	--	--	K03860|4.3e-09|nnu:104608881|K03860 phosphatidylinositol N-acetylglucosaminyltransferase subunit Q | (RefSeq) N-acetylglucosaminyl-phosphatidylinositol biosynthetic protein gpi1-like	Glycosylphosphatidylinositol (GPI)-anchor biosynthesis (ko00563)	--	--	Gibberellin regulated protein		Snakin-2 OS=Solanum tuberosum OX=4113 GN=SN2 PE=1 SV=1	S	Function unknown	unnamed protein product [Prunus armeniaca]
PaF106G0400018193.01	288	194	194	47	57	54	4.37982	3.53702	3.04577	0.779634	0.998312	0.824042	3.32223e-14	-1.77853	down	[Q]	Secondary metabolites biosynthesis, transport and catabolism	Molecular Function: oxidoreductase activity (GO:0016491);; Molecular Function: metal ion binding (GO:0046872);;	K04125|3.3e-161|pmum:103324491|K04125 gibberellin 2beta-dioxygenase [EC:1.14.11.13] | (RefSeq) gibberellin 2-beta-dioxygenase 8 isoform X1	Diterpenoid biosynthesis (ko00904)	[QR]	Secondary metabolites biosynthesis, transport and catabolism;; General function prediction only	2OG-Fe(II) oxygenase superfamily		Gibberellin 2-beta-dioxygenase 8 OS=Arabidopsis thaliana OX=3702 GN=GA2OX8 PE=1 SV=2	Q	Secondary metabolites biosynthesis, transport and catabolism	unnamed protein product [Prunus armeniaca]
PaF106G0300013739.01	100	73	84	152	158	237	1.84976	1.61025	1.60221	3.08384	3.43972	4.41028	4.14295e-06	1.05664	up	[Q]	Secondary metabolites biosynthesis, transport and catabolism	Molecular Function: oxidoreductase activity (GO:0016491);; Molecular Function: metal ion binding (GO:0046872);;	K04124|1.7e-218|pavi:110760088|K04124 gibberellin 3beta-dioxygenase [EC:1.14.11.15] | (RefSeq) gibberellin 3-beta-dioxygenase 1	Diterpenoid biosynthesis (ko00904)	[QR]	Secondary metabolites biosynthesis, transport and catabolism;; General function prediction only	2OG-Fe(II) oxygenase superfamily		Gibberellin 3-beta-dioxygenase 1 OS=Pisum sativum OX=3888 GN=LE PE=1 SV=1	Q	Secondary metabolites biosynthesis, transport and catabolism	unnamed protein product [Prunus armeniaca]
PaF106G0400016458.01	473	363	547	575	1152	1185	7.92329	7.28304	9.45865	10.4824	22.5435	19.8973	6.03454e-07	1.06738	up	[Q]	Secondary metabolites biosynthesis, transport and catabolism	Biological Process: response to light stimulus (GO:0009416);; Biological Process: gibberellin catabolic process (GO:0045487);; Molecular Function: metal ion binding (GO:0046872);; Molecular Function: dioxygenase activity (GO:0051213);; Molecular Function: C-19 gibberellin 2-beta-dioxygenase activity (GO:0052634);;	K04125|5.7e-138|pmum:103325827|K04125 gibberellin 2beta-dioxygenase [EC:1.14.11.13] | (RefSeq) gibberellin 2-beta-dioxygenase 1-like	Diterpenoid biosynthesis (ko00904)	[QR]	Secondary metabolites biosynthesis, transport and catabolism;; General function prediction only	non-haem dioxygenase in morphine synthesis N-terminal		Gibberellin 2-beta-dioxygenase 1 OS=Pisum sativum OX=3888 GN=GA2OX1 PE=1 SV=1	Q	Secondary metabolites biosynthesis, transport and catabolism	PREDICTED: gibberellin 2-beta-dioxygenase 1-like [Prunus mume]
PaF106G0100001314.01	95	83	72	182	225	273	1.4629	1.53174	1.15328	3.0704	4.07455	4.24503	2.43455e-10	1.38639	up	[Q]	Secondary metabolites biosynthesis, transport and catabolism	Molecular Function: oxidoreductase activity (GO:0016491);; Molecular Function: metal ion binding (GO:0046872);;	K04125|6.5e-193|pmum:103323224|K04125 gibberellin 2beta-dioxygenase [EC:1.14.11.13] | (RefSeq) gibberellin 2-beta-dioxygenase 2-like	Diterpenoid biosynthesis (ko00904)	[QR]	Secondary metabolites biosynthesis, transport and catabolism;; General function prediction only	2OG-Fe(II) oxygenase superfamily		Gibberellin 2-beta-dioxygenase 2 OS=Pisum sativum OX=3888 GN=GA2OX2 PE=2 SV=1	Q	Secondary metabolites biosynthesis, transport and catabolism	unnamed protein product [Prunus armeniaca]
PaF106G0300011287.01	910	721	675	233	189	299	24.6165	23.9511	19.4188	7.10611	6.00266	8.37705	1.3624e-23	-1.52804	down	--	--	Biological Process: response to acid chemical (GO:0001101);; Cellular Component: cellular_component (GO:0005575);; Cellular Component: cell (GO:0005623);; Cellular Component: plasma membrane (GO:0005886);; Biological Process: response to stress (GO:0006950);; Biological Process: response to osmotic stress (GO:0006970);; Biological Process: biological_process (GO:0008150);; Biological Process: res…	K03860|9.9e-09|nnu:104608881|K03860 phosphatidylinositol N-acetylglucosaminyltransferase subunit Q | (RefSeq) N-acetylglucosaminyl-phosphatidylinositol biosynthetic protein gpi1-like	Glycosylphosphatidylinositol (GPI)-anchor biosynthesis (ko00563)	--	--	Gibberellin regulated protein		Gibberellin-regulated protein 14 OS=Arabidopsis thaliana OX=3702 GN=GASA14 PE=1 SV=1	S	Function unknown	unnamed protein product [Prunus armeniaca]
PaF106G0400016036.01	0	0	0	82	58	46	0	0	0	4.04113	3.04975	2.09193	5.67728e-17	3.10266	up	--	--	Biological Process: reproduction (GO:0000003);; Biological Process: response to reactive oxygen species (GO:0000302);; Biological Process: response to acid chemical (GO:0001101);; Biological Process: developmental process involved in reproduction (GO:0003006);; Cellular Component: cellular_component (GO:0005575);; Cellular Component: extracellular region (GO:0005576);; Cellular Component: extrace…	--	--	--	--	Stigma-specific protein, Stig1		Protein GRIM REAPER OS=Arabidopsis thaliana OX=3702 GN=GRI PE=1 SV=1	S	Function unknown	unnamed protein product [Prunus armeniaca]
PaF106G0300014171.01	3517	3641	4523	6542	7470	8875	67.2416	83.3218	89.2095	136.143	166.736	169.916	3.84034e-18	1.0218	up	--	--	Cellular Component: nucleus (GO:0005634);; Biological Process: response to wounding (GO:0009611);; Biological Process: regulation of defense response (GO:0031347);; Biological Process: regulation of jasmonic acid mediated signaling pathway (GO:2000022);;	K13464|3.1e-61|pmum:103327604|K13464 jasmonate ZIM domain-containing protein | (RefSeq) protein TIFY 10B-like	Plant hormone signal transduction (ko04075)	--	--	tify domain		Protein TIFY 10b OS=Oryza sativa subsp. indica OX=39946 GN=TIFY10B PE=3 SV=1	S	Function unknown	unnamed protein product [Prunus armeniaca]
PaF106G0300012225.01	252	166	299	19	40	37	4.74436	3.73945	5.79832	0.383191	0.869663	0.692261	2.44661e-18	-2.36153	down	[M]	Cell wall/membrane/envelope biogenesis	Biological Process: response to acid chemical (GO:0001101);; Molecular Function: molecular_function (GO:0003674);; Molecular Function: nucleic acid binding (GO:0003676);; Molecular Function: RNA binding (GO:0003723);; Molecular Function: mRNA binding (GO:0003729);; Molecular Function: binding (GO:0005488);; Cellular Component: cellular_component (GO:0005575);; Cellular Component: intracellular (G…	K20285|1.7e-11|smo:SELMODRAFT_441110|K20285 Rab9 effector protein with kelch motifs | (RefSeq) hypothetical protein	--	[R]	General function prediction only	Galactose oxidase, central domain		Nitrile-specifier protein 2 OS=Arabidopsis thaliana OX=3702 GN=NSP2 PE=2 SV=1	S	Function unknown	unnamed protein product [Prunus armeniaca]
PaF106G0700027221.01	214	192	191	306	367	613	3.55543	3.81457	3.26056	5.53551	7.10334	10.1953	1.5025e-07	1.08016	up	[I]	Lipid transport and metabolism	Molecular Function: S-adenosylmethionine-dependent methyltransferase activity (GO:0008757);; Biological Process: methylation (GO:0032259);;	K21483|8.3e-90|bna:106358999|K21483 salicylate 1-O-methyltransferase [EC:2.1.1.274] | (RefSeq) salicylate carboxymethyltransferase-like	--	--	--	SAM dependent carboxyl methyltransferase		Jasmonate O-methyltransferase OS=Arabidopsis thaliana OX=3702 GN=JMT PE=1 SV=3	S	Function unknown	PREDICTED: jasmonate O-methyltransferase [Prunus mume]
PaF106G0100004447.01	433	366	469	711	974	1121	7.63603	7.73347	8.51691	13.6981	20.128	19.8417	1.76901e-14	1.17725	up	[I]	Lipid transport and metabolism	Molecular Function: S-adenosylmethionine-dependent methyltransferase activity (GO:0008757);; Biological Process: methylation (GO:0032259);;	K08241|2.5e-209|pmum:103320875|K08241 jasmonate O-methyltransferase [EC:2.1.1.141] | (RefSeq) jasmonate O-methyltransferase-like	alpha-Linolenic acid metabolism (ko00592)	--	--	SAM dependent carboxyl methyltransferase		Jasmonate O-methyltransferase OS=Brassica rapa subsp. pekinensis OX=51351 GN=JMT PE=1 SV=1	S	Function unknown	PREDICTED: jasmonate O-methyltransferase-like [Prunus mume]
PaF106G0100001268.01	155	168	173	372	521	501	1.52563	2.08406	1.84554	4.20221	6.12585	4.95617	2.80206e-15	1.47253	up	--	--	Biological Process: response to acid chemical (GO:0001101);; Molecular Function: molecular_function (GO:0003674);; Molecular Function: catalytic activity (GO:0003824);; Molecular Function: thiol-dependent ubiquitin-specific protease activity (GO:0004843);; Molecular Function: protein binding (GO:0005515);; Cellular Component: cellular_component (GO:0005575);; Cellular Component: intracellular (GO…	K11838|8.7e-21|pda:103720599|K11838 ubiquitin carboxyl-terminal hydrolase 7 [EC:3.4.19.12] | (RefSeq) ubiquitin carboxyl-terminal hydrolase 12-like isoform X1	--	[DR]	Cell cycle control, cell division, chromosome partitioning;; General function prediction only	MATH domain		MATH domain and coiled-coil domain-containing protein At3g58210 OS=Arabidopsis thaliana OX=3702 GN=At3g58210 PE=4 SV=1	D	Cell cycle control, cell division, chromosome partitioning	uncharacterized protein LOC18793764 [Prunus persica]
PaF106G0500021188.01	0	0	0	56	62	86	0	0	0	1.2151	1.44824	1.72401	3.40877e-20	3.35075	up	--	--	Molecular Function: S-adenosylmethionine-dependent methyltransferase activity (GO:0008757);; Biological Process: methylation (GO:0032259);;	K08241|1.2e-18|fve:101301186|K08241 jasmonate O-methyltransferase [EC:2.1.1.141] | (RefSeq) jasmonate O-methyltransferase-like	alpha-Linolenic acid metabolism (ko00592)	--	--	SAM dependent carboxyl methyltransferase		Loganic acid O-methyltransferase OS=Catharanthus roseus OX=4058 GN=LAMT PE=1 SV=1	S	Function unknown	loganic acid O-methyltransferase-like [Prunus dulcis]
PaF106G0200009482.01	104	75	69	31	27	15	1.82924	1.57115	1.2558	0.597254	0.553338	0.261208	0.000217891	-1.24652	down	--	--	Biological Process: response to acid chemical (GO:0001101);; Biological Process: regulation of response to biotic stimulus (GO:0002831);; Biological Process: organic acid metabolic process (GO:0006082);; Biological Process: cellular aromatic compound metabolic process (GO:0006725);; Biological Process: biological_process (GO:0008150);; Biological Process: metabolic process (GO:0008152);; Biologic…	--	--	--	--	--		--	S	Function unknown	unnamed protein product [Prunus armeniaca]
PaF106G0100006456.01	61	40	65	9	9	27	0.908426	0.713691	1.00396	0.142439	0.150678	0.4009	0.00105743	-1.22304	down	[E]	Amino acid transport and metabolism	Cellular Component: plastid (GO:0009536);; Biological Process: systemic acquired resistance, salicylic acid mediated signaling pathway (GO:0009862);; Biological Process: leaf senescence (GO:0010150);; Molecular Function: pyridoxal phosphate binding (GO:0030170);; Biological Process: defense response to bacterium (GO:0042742);;	K10206|8.3e-257|pper:18788763|K10206 LL-diaminopimelate aminotransferase [EC:2.6.1.83] | (RefSeq) aminotransferase ALD1	Lysine biosynthesis (ko00300);; Biosynthesis of amino acids (ko01230)	[E]	Amino acid transport and metabolism	Aminotransferase class I and II		Aminotransferase ALD1, chloroplastic OS=Arabidopsis thaliana OX=3702 GN=ALD1 PE=1 SV=2	E	Amino acid transport and metabolism	PREDICTED: LL-diaminopimelate aminotransferase [Prunus dulcis]
PaF106G0400014796.01	251	220	178	469	698	828	2.65859	2.7773	1.94796	5.43159	8.69489	8.80817	1.0085e-16	1.58158	up	--	--	Biological Process: response to hypoxia (GO:0001666);; Biological Process: defense response to insect (GO:0002213);; Cellular Component: nucleus (GO:0005634);; Cellular Component: cytoplasm (GO:0005737);; Biological Process: lipid metabolic process (GO:0006629);; Biological Process: response to insect (GO:0009625);; Biological Process: defense response to bacterium, incompatible interaction (GO:0…	K18875|7.9e-49|mdm:103455264|K18875 enhanced disease susceptibility 1 protein | (RefSeq) protein EDS1-like	Plant-pathogen interaction (ko04626)	--	--	Enhanced disease susceptibility 1 protein EP domain		Lipase-like PAD4 OS=Arabidopsis thaliana OX=3702 GN=PAD4 PE=1 SV=1	G	Carbohydrate transport and metabolism	hypothetical protein PRUPE_4G276500 [Prunus persica]
PaF106G0100001468.01	1317	652	1034	220	277	246	35.942	21.2827	29.1058	6.52586	8.81751	6.70859	1.96992e-21	-1.77027	down	--	--	Molecular Function: protein phosphatase inhibitor activity (GO:0004864);; Biological Process: defense response (GO:0006952);; Biological Process: response to biotic stimulus (GO:0009607);; Biological Process: abscisic acid-activated signaling pathway (GO:0009738);; Molecular Function: abscisic acid binding (GO:0010427);; Molecular Function: signaling receptor activity (GO:0038023);;	--	--	--	--	Pathogenesis-related protein Bet v 1 family		Major strawberry allergen Fra a 1.08 OS=Fragaria ananassa OX=3747 GN=Fra a 1.08 PE=1 SV=1	S	Function unknown	PREDICTED: major allergen Pru ar 1-like isoform X1 [Prunus mume]
PaF106G0300013611.01	107	138	102	29	12	35	1.69853	2.6342	1.66752	0.500261	0.206958	0.546431	1.80247e-07	-1.66522	down	--	--	Biological Process: cell morphogenesis (GO:0000902);; Biological Process: cell morphogenesis involved in differentiation (GO:0000904);; Biological Process: response to acid chemical (GO:0001101);; Biological Process: regulation of immune system process (GO:0002682);; Biological Process: regulation of response to biotic stimulus (GO:0002831);; Biological Process: regionalization (GO:0003002);; Mol…	--	--	[R]	General function prediction only	Leucine rich repeat		Protein TOO MANY MOUTHS OS=Arabidopsis thaliana OX=3702 GN=TMM PE=1 SV=1	S	Function unknown	unnamed protein product [Prunus armeniaca]
PaF106G0700027200.01	124	109	165	198	282	555	2.49431	2.62493	3.44016	4.35834	6.65728	11.2367	4.1481e-06	1.23415	up	--	--	Cellular Component: cytosol (GO:0005829);; Biological Process: response to water deprivation (GO:0009414);; Biological Process: cold acclimation (GO:0009631);; Biological Process: response to abscisic acid (GO:0009737);;	--	--	--	--	Dehydrin		--	S	Function unknown	PREDICTED: cold-shock protein CS120-like [Prunus mume]
PaF106G0300011189.01	575	499	721	1348	1403	1779	4.43468	4.60952	5.73507	11.3181	12.6383	13.748	2.43584e-26	1.37431	up	[G]	Carbohydrate transport and metabolism	Biological Process: response to acid chemical (GO:0001101);; Molecular Function: molecular_function (GO:0003674);; Molecular Function: catalytic activity (GO:0003824);; Cellular Component: cellular_component (GO:0005575);; Cellular Component: intracellular (GO:0005622);; Cellular Component: cell (GO:0005623);; Cellular Component: cytoplasm (GO:0005737);; Biological Process: response to stress (GO…	K06617|0.0e+00|pmum:103329815|K06617 raffinose synthase [EC:2.4.1.82] | (RefSeq) probable galactinol--sucrose galactosyltransferase 5	Galactose metabolism (ko00052)	--	--	Raffinose synthase or seed imbibition protein Sip1		Probable galactinol--sucrose galactosyltransferase 5 OS=Arabidopsis thaliana OX=3702 GN=RFS5 PE=1 SV=1	S	Function unknown	unnamed protein product [Prunus armeniaca]
PaF106G0100003928.01	1984	1593	2002	4867	4032	5049	43.4419	40.5731	43.7716	118.281	104.173	114.13	1.35841e-54	1.39056	up	[T]	Signal transduction mechanisms	Biological Process: response to acid chemical (GO:0001101);; Molecular Function: molecular_function (GO:0003674);; Molecular Function: catalytic activity (GO:0003824);; Biological Process: response to stress (GO:0006950);; Biological Process: biological_process (GO:0008150);; Biological Process: response to water deprivation (GO:0009414);; Biological Process: response to water (GO:0009415);; Biol…	K17991|3.3e-112|pmum:103321432|K17991 peroxygenase [EC:1.11.2.3] | (RefSeq) probable peroxygenase 4	Cutin, suberine and wax biosynthesis (ko00073)	--	--	Caleosin related protein		Probable peroxygenase 4 OS=Arabidopsis thaliana OX=3702 GN=PXG4 PE=1 SV=1	S	Function unknown	unnamed protein product [Prunus armeniaca]
PaF106G0100003377.01	257	101	183	381	600	583	4.55479	2.12561	3.34565	7.3617	12.4234	10.3613	4.55087e-10	1.47301	up	--	--	Biological Process: response to heat (GO:0009408);; Biological Process: regulation of abscisic acid biosynthetic process (GO:0010115);;	--	--	--	--	--		Nodulin-related protein 1 OS=Arabidopsis thaliana OX=3702 GN=NRP1 PE=1 SV=1	--	--	unnamed protein product [Prunus armeniaca]
PaF106G0800031073.01	98	77	68	112	340	265	1.40252	1.3235	1.00198	1.74764	5.69459	3.83177	8.17849e-06	1.35141	up	[QV]	Secondary metabolites biosynthesis, transport and catabolism;; Defense mechanisms	Molecular Function: monooxygenase activity (GO:0004497);; Molecular Function: iron ion binding (GO:0005506);; Cellular Component: integral component of membrane (GO:0016021);; Molecular Function: oxidoreductase activity, acting on paired donors, with incorporation or reduction of molecular oxygen (GO:0016705);; Molecular Function: heme binding (GO:0020037);;	K09843|2.4e-176|pmum:103335270|K09843 (+)-abscisic acid 8'-hydroxylase [EC:1.14.14.137] | (RefSeq) abscisic acid 8'-hydroxylase 4	Carotenoid biosynthesis (ko00906)	[QI]	Secondary metabolites biosynthesis, transport and catabolism;; Lipid transport and metabolism	Cytochrome P450		Abscisic acid 8'-hydroxylase 4 OS=Arabidopsis thaliana OX=3702 GN=CYP707A4 PE=2 SV=2	Q	Secondary metabolites biosynthesis, transport and catabolism	unnamed protein product [Prunus armeniaca]
PaF106G0500018649.01	295	373	295	93	75	113	1.85176	2.79864	1.91024	0.632252	0.548491	0.710202	5.0458e-13	-1.56043	down	--	--	Cellular Component: chromatin (GO:0000785);; Molecular Function: transcription regulatory region sequence-specific DNA binding (GO:0000976);; Molecular Function: regulatory region nucleic acid binding (GO:0001067);; Molecular Function: molecular_function (GO:0003674);; Molecular Function: nucleic acid binding (GO:0003676);; Molecular Function: DNA binding (GO:0003677);; Molecular Function: chroma…	K15601|3.6e-285|pper:18775974|K15601 [histone H3]-dimethyl-L-lysine9 demethylase [EC:1.14.11.65] | (RefSeq) lysine-specific demethylase JMJ25	--	[K]	Transcription	--		Lysine-specific demethylase JMJ25 OS=Arabidopsis thaliana OX=3702 GN=JMJ25 PE=1 SV=1	K	Transcription	unnamed protein product [Prunus armeniaca]
Prunus_sibirica_newGene_1385	122	48	52	13	18	4	1.871	0.78965	0.822198	0.260043	0.260352	0.047299	4.69004e-05	-1.54191	down	--	--	Molecular Function: nucleic acid binding (GO:0003676);; Molecular Function: zinc ion binding (GO:0008270);; Biological Process: DNA integration (GO:0015074);;	K14503|3.8e-26|mdm:114821340|K14503 brassinosteroid resistant 1/2 | (RefSeq) BES1/BZR1 homolog protein 2-like	Plant hormone signal transduction (ko04075)	--	--	gag-polypeptide of LTR copia-type		--	L	Replication, recombination and repair	hypothetical protein Prudu_019255 [Prunus dulcis]
PaF106G0600023102.01	428	256	315	42	63	45	5.21281	3.7289	3.95261	0.546058	0.893436	0.542097	7.78055e-24	-2.33293	down	--		Molecular Function: protein kinase activity (GO:0004672);; Molecular Function: ATP binding (GO:0005524);; Cellular Component: integral component of membrane (GO:0016021);;	K13416|3.1e-46|egr:104419928|K13416 brassinosteroid insensitive 1-associated receptor kinase 1 [EC:2.7.10.1 2.7.11.1] | (RefSeq) BRASSINOSTEROID INSENSITIVE 1-associated receptor kinase 1	MAPK signaling pathway - plant (ko04016);; Plant hormone signal transduction (ko04075);; Plant-pathogen interaction (ko04626)	[T]	Signal transduction mechanisms	Protein kinase domain		Rust resistance kinase Lr10 OS=Triticum aestivum OX=4565 GN=LRK10 PE=2 SV=1	T	Signal transduction mechanisms	rust resistance kinase Lr10-like isoform X1 [Prunus avium]
PaF106G0500020009.01	708	531	695	111	204	222	4.65903	4.17882	4.71604	0.79276	1.56099	1.45823	3.42083e-16	-1.6264	down	--	--	Molecular Function: ADP binding (GO:0043531);;	K13415|9.1e-150|mdm:103413440|K13415 protein brassinosteroid insensitive 1 [EC:2.7.10.1 2.7.11.1] | (RefSeq) uncharacterized protein LOC103413440 isoform X1	Plant hormone signal transduction (ko04075)	--	--	Arabidopsis broad-spectrum mildew resistance protein RPW8		Probable disease resistance protein At5g66900 OS=Arabidopsis thaliana OX=3702 GN=At5g66900 PE=3 SV=1	T	Signal transduction mechanisms	unnamed protein product [Prunus armeniaca]
PaF106G0200007209.01	445	405	438	101	130	175	3.62263	3.94319	3.67949	0.887328	1.22935	1.42456	2.23439e-16	-1.49123	down	--		Molecular Function: protein kinase activity (GO:0004672);; Molecular Function: ATP binding (GO:0005524);; Cellular Component: integral component of membrane (GO:0016021);;	K13416|2.1e-54|pvu:PHAVU_006G208100g|K13416 brassinosteroid insensitive 1-associated receptor kinase 1 [EC:2.7.10.1 2.7.11.1] | (RefSeq) hypothetical protein	MAPK signaling pathway - plant (ko04016);; Plant hormone signal transduction (ko04075);; Plant-pathogen interaction (ko04626)	[T]	Signal transduction mechanisms	Protein kinase domain		LEAF RUST 10 DISEASE-RESISTANCE LOCUS RECEPTOR-LIKE PROTEIN KINASE-like 2.5 OS=Arabidopsis thaliana OX=3702 GN=LRK10L-2.5 PE=3 SV=1	T	Signal transduction mechanisms	LEAF RUST 10 DISEASE-RESISTANCE LOCUS RECEPTOR-LIKE PROTEIN KINASE-like 2.5 [Prunus dulcis]
Prunus_sibirica_newGene_1871	295	247	214	0	0	0	2.86235	2.8703	2.144	0	0	0	1.79177e-56	-5.08363	down	--	--	Molecular Function: nucleic acid binding (GO:0003676);; Molecular Function: zinc ion binding (GO:0008270);;	K14503|4.9e-26|mdm:114821340|K14503 brassinosteroid resistant 1/2 | (RefSeq) BES1/BZR1 homolog protein 2-like	Plant hormone signal transduction (ko04075)	--	--	gag-polypeptide of LTR copia-type		--	L	Replication, recombination and repair	hypothetical protein Prudu_008427 [Prunus dulcis]
PaF106G0600023103.01	271	265	336	16	33	41	2.65941	3.10806	3.40314	0.160726	0.37313	0.395451	2.05978e-28	-2.77033	down	--		Molecular Function: protein serine/threonine kinase activity (GO:0004674);; Molecular Function: ATP binding (GO:0005524);; Molecular Function: polysaccharide binding (GO:0030247);;	K13416|3.2e-48|bna:106376693|K13416 brassinosteroid insensitive 1-associated receptor kinase 1 [EC:2.7.10.1 2.7.11.1] | (RefSeq) BRASSINOSTEROID INSENSITIVE 1-associated receptor kinase 1-like isoform X1	MAPK signaling pathway - plant (ko04016);; Plant hormone signal transduction (ko04075);; Plant-pathogen interaction (ko04626)	--	--	Protein kinase domain		Rust resistance kinase Lr10 OS=Triticum aestivum OX=4565 GN=LRK10 PE=2 SV=1	T	Signal transduction mechanisms	PREDICTED: rust resistance kinase Lr10-like [Prunus mume]
PaF106G0700027481.01	411	349	287	128	90	161	3.98186	4.04896	2.87098	1.34859	1.01411	1.5629	7.53536e-10	-1.28057	down	--	--	Molecular Function: cysteine-type peptidase activity (GO:0008234);; Molecular Function: ADP binding (GO:0043531);;	K13415|2.8e-44|mdm:103413440|K13415 protein brassinosteroid insensitive 1 [EC:2.7.10.1 2.7.11.1] | (RefSeq) uncharacterized protein LOC103413440 isoform X1	Plant hormone signal transduction (ko04075)	--	--	NB-ARC domain		Probable disease resistance protein At5g66900 OS=Arabidopsis thaliana OX=3702 GN=At5g66900 PE=3 SV=1	S	Function unknown	unnamed protein product [Prunus armeniaca]
PaF106G0300012858.01	74	52	54	8	16	0	0.823235	0.695982	0.619625	0.088483	0.209491	0	0.000275128	-1.43383	down	--		Molecular Function: protein kinase activity (GO:0004672);; Molecular Function: ATP binding (GO:0005524);; Cellular Component: integral component of membrane (GO:0016021);;	K13416|1.2e-49|ccaj:109804867|K13416 brassinosteroid insensitive 1-associated receptor kinase 1 [EC:2.7.10.1 2.7.11.1] | (RefSeq) BRASSINOSTEROID INSENSITIVE 1-associated receptor kinase 1-like	MAPK signaling pathway - plant (ko04016);; Plant hormone signal transduction (ko04075);; Plant-pathogen interaction (ko04626)	--	--	Protein kinase domain		PR5-like receptor kinase OS=Arabidopsis thaliana OX=3702 GN=PR5K PE=1 SV=1	T	Signal transduction mechanisms	unnamed protein product [Prunus armeniaca]
PaF106G0300013030.01	61	117	92	22	16	34	0.563543	1.29363	0.873762	0.214226	0.171026	0.308423	4.23018e-05	-1.39312	down	--		Molecular Function: protein serine/threonine kinase activity (GO:0004674);; Molecular Function: ATP binding (GO:0005524);; Cellular Component: integral component of membrane (GO:0016021);; Biological Process: recognition of pollen (GO:0048544);;	K13416|1.0e-60|mdm:103416332|K13416 brassinosteroid insensitive 1-associated receptor kinase 1 [EC:2.7.10.1 2.7.11.1] | (RefSeq) BRASSINOSTEROID INSENSITIVE 1-associated receptor kinase 1-like isoform X1	MAPK signaling pathway - plant (ko04016);; Plant hormone signal transduction (ko04075);; Plant-pathogen interaction (ko04626)	--	--	Protein kinase domain		G-type lectin S-receptor-like serine/threonine-protein kinase At2g19130 OS=Arabidopsis thaliana OX=3702 GN=At2g19130 PE=2 SV=1	T	Signal transduction mechanisms	PREDICTED: G-type lectin S-receptor-like serine/threonine-protein kinase At2g19130 [Prunus mume]
PaF106G0600023488.01	178	120	164	50	34	66	1.49646	1.20553	1.41882	0.457203	0.327201	0.553897	3.4045e-07	-1.33626	down	--		Molecular Function: protein serine/threonine kinase activity (GO:0004674);; Molecular Function: ATP binding (GO:0005524);; Cellular Component: integral component of membrane (GO:0016021);;	K13416|3.6e-51|cqi:110688695|K13416 brassinosteroid insensitive 1-associated receptor kinase 1 [EC:2.7.10.1 2.7.11.1] | (RefSeq) BRASSINOSTEROID INSENSITIVE 1-associated receptor kinase 1-like	MAPK signaling pathway - plant (ko04016);; Plant hormone signal transduction (ko04075);; Plant-pathogen interaction (ko04626)	--	--	Protein kinase domain		G-type lectin S-receptor-like serine/threonine-protein kinase LECRK2 OS=Oryza sativa subsp. indica OX=39946 GN=LECRK2 PE=2 SV=1	T	Signal transduction mechanisms	unnamed protein product [Prunus armeniaca]
PaF106G0500018981.01	965	872	881	342	304	450	12.9433	13.8212	12.2681	4.79869	4.61488	5.90882	6.15702e-21	-1.19731	down	--	--	Molecular Function: protein kinase activity (GO:0004672);; Molecular Function: ATP binding (GO:0005524);; Biological Process: brassinosteroid mediated signaling pathway (GO:0009742);;	K14500|6.0e-288|pmum:103336934|K14500 BR-signaling kinase [EC:2.7.11.1] | (RefSeq) probable serine/threonine-protein kinase At5g41260	Plant hormone signal transduction (ko04075)	--	--	Protein kinase domain		Serine/threonine-protein kinase BSK2 OS=Arabidopsis thaliana OX=3702 GN=BSK2 PE=1 SV=1	T	Signal transduction mechanisms	hypothetical protein PRUPE_5G041700 [Prunus persica]
PaF106G0400017495.01	2986	2488	2970	1039	1356	1439	22.5932	22.2298	23.2285	8.53016	12.0703	10.9243	4.01829e-19	-1.02439	down	[W]	Extracellular structures	Molecular Function: protein kinase activity (GO:0004672);; Molecular Function: ATP binding (GO:0005524);; Cellular Component: integral component of membrane (GO:0016021);;	K13416|9.0e-72|gmx:100305355|K13416 brassinosteroid insensitive 1-associated receptor kinase 1 [EC:2.7.10.1 2.7.11.1] | (RefSeq) somatic embryogenesis receptor-like kinase-like protein precursor	MAPK signaling pathway - plant (ko04016);; Plant hormone signal transduction (ko04075);; Plant-pathogen interaction (ko04626)	--	--	Protein tyrosine and serine/threonine kinase		Probable LRR receptor-like serine/threonine-protein kinase RFK1 OS=Arabidopsis thaliana OX=3702 GN=RKF1 PE=1 SV=1	T	Signal transduction mechanisms	probable LRR receptor-like serine/threonine-protein kinase RFK1 isoform X1 [Prunus persica]
PaF106G0100002724.01	694	434	516	1031	1187	1227	8.50971	6.50167	6.55555	13.2735	16.5232	14.7397	2.86709e-16	1.12944	up	--	--	Molecular Function: DNA binding (GO:0003677);; Cellular Component: nucleus (GO:0005634);; Cellular Component: host cell nucleus (GO:0042025);; Molecular Function: metal ion binding (GO:0046872);;	K13415|2.2e-17|mdm:103413440|K13415 protein brassinosteroid insensitive 1 [EC:2.7.10.1 2.7.11.1] | (RefSeq) uncharacterized protein LOC103413440 isoform X1	Plant hormone signal transduction (ko04075)	--	--	SBP domain		Squamosa promoter-binding-like protein 13A OS=Arabidopsis thaliana OX=3702 GN=SPL13A PE=1 SV=1	K	Transcription	unnamed protein product [Prunus armeniaca]
PaF106G0600022891.01	1013	623	652	1185	2074	1657	6.81142	4.97631	4.59524	8.56026	16.0339	11.0716	0.000460436	1.02157	up	[T]	Signal transduction mechanisms	Molecular Function: protein serine/threonine kinase activity (GO:0004674);; Molecular Function: ATP binding (GO:0005524);; Cellular Component: plasma membrane (GO:0005886);; Biological Process: protein autophosphorylation (GO:0046777);;	K13416|1.0e-44|cam:101506449|K13416 brassinosteroid insensitive 1-associated receptor kinase 1 [EC:2.7.10.1 2.7.11.1] | (RefSeq) BRASSINOSTEROID INSENSITIVE 1-associated receptor kinase 1	MAPK signaling pathway - plant (ko04016);; Plant hormone signal transduction (ko04075);; Plant-pathogen interaction (ko04626)	--	--	Protein tyrosine and serine/threonine kinase		Probable LRR receptor-like serine/threonine-protein kinase At1g53430 OS=Arabidopsis thaliana OX=3702 GN=At1g53430 PE=1 SV=1	T	Signal transduction mechanisms	PREDICTED: probable LRR receptor-like serine/threonine-protein kinase At1g53420 [Prunus mume]
PaF106G0400017490.01	28	44	26	97	136	133	0.172143	0.329505	0.168637	0.692348	1.03263	0.849515	8.98218e-08	1.60144	up	--		Molecular Function: protein serine/threonine kinase activity (GO:0004674);; Molecular Function: ATP binding (GO:0005524);; Cellular Component: plasma membrane (GO:0005886);; Cellular Component: integral component of membrane (GO:0016021);; Biological Process: protein autophosphorylation (GO:0046777);;	K13416|8.2e-67|bna:106376693|K13416 brassinosteroid insensitive 1-associated receptor kinase 1 [EC:2.7.10.1 2.7.11.1] | (RefSeq) BRASSINOSTEROID INSENSITIVE 1-associated receptor kinase 1-like isoform X1	MAPK signaling pathway - plant (ko04016);; Plant hormone signal transduction (ko04075);; Plant-pathogen interaction (ko04626)	--	--	Protein kinase domain		Probable LRR receptor-like serine/threonine-protein kinase At1g07650 OS=Arabidopsis thaliana OX=3702 GN=At1g07650 PE=1 SV=1	T	Signal transduction mechanisms	PREDICTED: probable leucine-rich repeat receptor-like serine/threonine-protein kinase At3g14840 [Prunus mume]
PaF106G0700027474.01	31	26	21	73	91	118	0.246135	0.243725	0.168166	0.632127	0.848205	0.928881	2.39427e-07	1.56238	up	--	--	Molecular Function: ADP binding (GO:0043531);;	K13415|3.3e-20|mdm:103413440|K13415 protein brassinosteroid insensitive 1 [EC:2.7.10.1 2.7.11.1] | (RefSeq) uncharacterized protein LOC103413440 isoform X1	Plant hormone signal transduction (ko04075)	--	--	NB-ARC domain		Probable disease resistance protein At5g66900 OS=Arabidopsis thaliana OX=3702 GN=At5g66900 PE=3 SV=1	S	Function unknown	unnamed protein product [Prunus armeniaca]
PaF106G0600021600.01	94	83	49	252	197	286	0.827215	0.866002	0.445314	2.41329	2.02451	2.51452	6.22078e-11	1.57728	up	--		Molecular Function: protein serine/threonine kinase activity (GO:0004674);; Molecular Function: ATP binding (GO:0005524);;	K13416|8.4e-58|adu:107481750|K13416 brassinosteroid insensitive 1-associated receptor kinase 1 [EC:2.7.10.1 2.7.11.1] | (RefSeq) BRASSINOSTEROID INSENSITIVE 1-associated receptor kinase 1 isoform X1	MAPK signaling pathway - plant (ko04016);; Plant hormone signal transduction (ko04075);; Plant-pathogen interaction (ko04626)	--	--	Protein kinase domain		G-type lectin S-receptor-like serine/threonine-protein kinase LECRK2 OS=Oryza sativa subsp. indica OX=39946 GN=LECRK2 PE=2 SV=1	T	Signal transduction mechanisms	PREDICTED: G-type lectin S-receptor-like serine/threonine-protein kinase RLK1 [Prunus mume]
PaF106G0300013592.01	95	112	65	320	358	438	1.47886	2.07826	1.03642	5.4188	6.51287	6.83819	8.42129e-19	1.91314	up	[M]	Cell wall/membrane/envelope biogenesis	Molecular Function: protein serine/threonine kinase activity (GO:0004674);; Molecular Function: ATP binding (GO:0005524);; Cellular Component: integral component of membrane (GO:0016021);;	K13416|2.5e-51|lsv:111899011|K13416 brassinosteroid insensitive 1-associated receptor kinase 1 [EC:2.7.10.1 2.7.11.1] | (RefSeq) BRASSINOSTEROID INSENSITIVE 1-associated receptor kinase 1-like isoform X1	MAPK signaling pathway - plant (ko04016);; Plant hormone signal transduction (ko04075);; Plant-pathogen interaction (ko04626)	[T]	Signal transduction mechanisms	Protein kinase domain		LEAF RUST 10 DISEASE-RESISTANCE LOCUS RECEPTOR-LIKE PROTEIN KINASE-like 2.2 OS=Arabidopsis thaliana OX=3702 GN=LRK10L-2.2 PE=3 SV=2	T	Signal transduction mechanisms	LEAF RUST 10 DISEASE-RESISTANCE LOCUS RECEPTOR-LIKE PROTEIN KINASE-like 2.2 [Prunus dulcis]
PaF106G0100006458.01	46	32	33	150	210	235	0.67071	0.560371	0.490804	2.38729	3.58056	3.42848	1.92403e-18	2.18811	up	--		Molecular Function: transmembrane receptor protein serine/threonine kinase activity (GO:0004675);; Molecular Function: receptor binding (GO:0005102);; Molecular Function: ATP binding (GO:0005524);;	K13416|1.6e-189|pper:18792858|K13416 brassinosteroid insensitive 1-associated receptor kinase 1 [EC:2.7.10.1 2.7.11.1] | (RefSeq) BRASSINOSTEROID INSENSITIVE 1-associated receptor kinase 1	MAPK signaling pathway - plant (ko04016);; Plant hormone signal transduction (ko04075);; Plant-pathogen interaction (ko04626)	[T]	Signal transduction mechanisms	Protein kinase domain		BRASSINOSTEROID INSENSITIVE 1-associated receptor kinase 1 OS=Arabidopsis thaliana OX=3702 GN=BAK1 PE=1 SV=2	T	Signal transduction mechanisms	BRASSINOSTEROID INSENSITIVE 1-associated receptor kinase 1-like [Prunus dulcis]
PaF106G0400017491.01	325	323	361	1231	1532	1930	2.23167	2.62097	2.47333	8.92741	12.0212	12.9298	2.2585e-57	2.20834	up	[M]	Cell wall/membrane/envelope biogenesis	Molecular Function: protein serine/threonine kinase activity (GO:0004674);; Molecular Function: ATP binding (GO:0005524);; Cellular Component: plasma membrane (GO:0005886);; Cellular Component: integral component of membrane (GO:0016021);; Biological Process: protein autophosphorylation (GO:0046777);;	K13416|1.4e-50|han:110928984|K13416 brassinosteroid insensitive 1-associated receptor kinase 1 [EC:2.7.10.1 2.7.11.1] | (RefSeq) BRASSINOSTEROID INSENSITIVE 1-associated receptor kinase 1-like isoform X1	MAPK signaling pathway - plant (ko04016);; Plant hormone signal transduction (ko04075);; Plant-pathogen interaction (ko04626)	--	--	Protein tyrosine and serine/threonine kinase		Probable LRR receptor-like serine/threonine-protein kinase At1g07650 OS=Arabidopsis thaliana OX=3702 GN=At1g07650 PE=1 SV=1	T	Signal transduction mechanisms	PREDICTED: probable leucine-rich repeat receptor-like serine/threonine-protein kinase At3g14840 [Prunus mume]
PaF106G0700027475.01	5	12	7	92	130	124	0.039894	0.116055	0.06052	0.836031	1.2718	1.03994	3.80866e-19	2.87402	up	[R]	General function prediction only	Molecular Function: ADP binding (GO:0043531);;	K13415|5.0e-37|mdm:103413440|K13415 protein brassinosteroid insensitive 1 [EC:2.7.10.1 2.7.11.1] | (RefSeq) uncharacterized protein LOC103413440 isoform X1	Plant hormone signal transduction (ko04075)	--	--	NB-ARC domain		Probable disease resistance protein At5g66900 OS=Arabidopsis thaliana OX=3702 GN=At5g66900 PE=3 SV=1	S	Function unknown	unnamed protein product [Prunus armeniaca]
PaF106G0600021566.01	53	25	46	298	239	348	0.413644	0.235091	0.374087	2.57303	2.21069	2.76122	9.25449e-31	2.6173	up	--		Molecular Function: protein serine/threonine kinase activity (GO:0004674);; Molecular Function: ATP binding (GO:0005524);; Cellular Component: integral component of membrane (GO:0016021);; Molecular Function: carbohydrate binding (GO:0030246);; Biological Process: recognition of pollen (GO:0048544);;	K13416|6.6e-58|mdm:103416332|K13416 brassinosteroid insensitive 1-associated receptor kinase 1 [EC:2.7.10.1 2.7.11.1] | (RefSeq) BRASSINOSTEROID INSENSITIVE 1-associated receptor kinase 1-like isoform X1	MAPK signaling pathway - plant (ko04016);; Plant hormone signal transduction (ko04075);; Plant-pathogen interaction (ko04626)	--	--	Protein kinase domain		G-type lectin S-receptor-like serine/threonine-protein kinase RLK1 OS=Arabidopsis thaliana OX=3702 GN=RLK1 PE=2 SV=2	T	Signal transduction mechanisms	PREDICTED: G-type lectin S-receptor-like serine/threonine-protein kinase RLK1 [Prunus mume]
PaF106G0200008156.01	33	12	30	170	177	169	0.305029	0.128102	0.287588	1.71851	1.92486	1.57862	2.29391e-18	2.41523	up	--		Molecular Function: protein kinase activity (GO:0004672);; Molecular Function: ATP binding (GO:0005524);; Cellular Component: integral component of membrane (GO:0016021);; Molecular Function: polysaccharide binding (GO:0030247);;	K13416|3.1e-48|ccaj:109804867|K13416 brassinosteroid insensitive 1-associated receptor kinase 1 [EC:2.7.10.1 2.7.11.1] | (RefSeq) BRASSINOSTEROID INSENSITIVE 1-associated receptor kinase 1-like	MAPK signaling pathway - plant (ko04016);; Plant hormone signal transduction (ko04075);; Plant-pathogen interaction (ko04626)	--	--	Protein kinase domain		Rust resistance kinase Lr10 OS=Triticum aestivum OX=4565 GN=LRK10 PE=2 SV=1	T	Signal transduction mechanisms	PREDICTED: LEAF RUST 10 DISEASE-RESISTANCE LOCUS RECEPTOR-LIKE PROTEIN KINASE-like 2.4 [Prunus mume]
PaF106G0600021563.01	17	13	10	191	177	223	0.129709	0.123601	0.076233	1.65875	1.64958	1.77972	5.18976e-36	3.32287	up	--		Molecular Function: protein serine/threonine kinase activity (GO:0004674);; Molecular Function: ATP binding (GO:0005524);; Cellular Component: integral component of membrane (GO:0016021);; Molecular Function: carbohydrate binding (GO:0030246);; Biological Process: recognition of pollen (GO:0048544);;	K13416|3.0e-58|mdm:103416332|K13416 brassinosteroid insensitive 1-associated receptor kinase 1 [EC:2.7.10.1 2.7.11.1] | (RefSeq) BRASSINOSTEROID INSENSITIVE 1-associated receptor kinase 1-like isoform X1	MAPK signaling pathway - plant (ko04016);; Plant hormone signal transduction (ko04075);; Plant-pathogen interaction (ko04626)	--	--	Protein kinase domain		G-type lectin S-receptor-like serine/threonine-protein kinase RLK1 OS=Arabidopsis thaliana OX=3702 GN=RLK1 PE=2 SV=2	T	Signal transduction mechanisms	PREDICTED: G-type lectin S-receptor-like serine/threonine-protein kinase RLK1 [Prunus mume]
PaF106G0600021559.01	12	29	21	313	283	409	0.096838	0.283678	0.173877	2.86233	2.77488	3.44368	7.82342e-46	3.51778	up	--		Molecular Function: protein serine/threonine kinase activity (GO:0004674);; Molecular Function: ATP binding (GO:0005524);; Cellular Component: integral component of membrane (GO:0016021);; Molecular Function: carbohydrate binding (GO:0030246);; Biological Process: recognition of pollen (GO:0048544);;	K13416|3.3e-57|mdm:103416332|K13416 brassinosteroid insensitive 1-associated receptor kinase 1 [EC:2.7.10.1 2.7.11.1] | (RefSeq) BRASSINOSTEROID INSENSITIVE 1-associated receptor kinase 1-like isoform X1	MAPK signaling pathway - plant (ko04016);; Plant hormone signal transduction (ko04075);; Plant-pathogen interaction (ko04626)	--	--	Protein kinase domain		G-type lectin S-receptor-like serine/threonine-protein kinase RLK1 OS=Arabidopsis thaliana OX=3702 GN=RLK1 PE=2 SV=2	T	Signal transduction mechanisms	PREDICTED: G-type lectin S-receptor-like serine/threonine-protein kinase RLK1 [Prunus mume]
PaF106G0300012867.01	0	4	2	111	131	90	0	0.053435	0.022134	1.3466	1.70698	1.00398	6.97888e-25	3.53673	up	--		Molecular Function: protein kinase activity (GO:0004672);; Molecular Function: ATP binding (GO:0005524);; Molecular Function: polysaccharide binding (GO:0030247);;	K13415|5.8e-33|mus:103980973|K13415 protein brassinosteroid insensitive 1 [EC:2.7.10.1 2.7.11.1] | (RefSeq) systemin receptor SR160-like	Plant hormone signal transduction (ko04075)	[T]	Signal transduction mechanisms	Protein kinase domain		LEAF RUST 10 DISEASE-RESISTANCE LOCUS RECEPTOR-LIKE PROTEIN KINASE-like 2.1 OS=Arabidopsis thaliana OX=3702 GN=LRK10L-2.1 PE=3 SV=1	T	Signal transduction mechanisms	LEAF RUST 10 DISEASE-RESISTANCE LOCUS RECEPTOR-LIKE PROTEIN KINASE-like 2.1 [Prunus avium]
PaF106G0700028234.01	131	89	109	14	16	35	2.97043	2.43875	3.09294	0.338587	0.416383	0.785358	9.68627e-09	-1.78732	down	--	--	Biological Process: lipid metabolic process (GO:0006629);; Cellular Component: integral component of membrane (GO:0016021);; Molecular Function: oxidoreductase activity (GO:0016491);; Molecular Function: oxidoreductase activity, acting on the CH-CH group of donors (GO:0016627);;	K09591|5.4e-17|gra:105779649|K09591 steroid 5-alpha-reductase [EC:1.3.1.22] | (RefSeq) steroid 5-alpha-reductase DET2	Brassinosteroid biosynthesis (ko00905)	[I]	Lipid transport and metabolism	3-oxo-5-alpha-steroid 4-dehydrogenase		Polyprenol reductase 1 OS=Arabidopsis thaliana OX=3702 GN=PPRD1 PE=1 SV=1	I	Lipid transport and metabolism	PREDICTED: very-long-chain enoyl-CoA reductase-like [Prunus mume]
PaF106G0100003722.01	162	98	132	23	14	65	3.38985	2.45856	2.85202	0.520798	0.327111	1.35271	3.23799e-05	-1.41355	down	--	--	Cellular Component: nucleus (GO:0005634);; Biological Process: regulation of transcription, DNA-templated (GO:0006355);; Molecular Function: protein dimerization activity (GO:0046983);; Biological Process: positive regulation of brassinosteroid biosynthetic process (GO:2000488);;	K18878|1.2e-25|cann:107866053|K18878 BHLH transcription factor Upa20 | (RefSeq) Upa20; transcription factor bHLH137-like	Plant-pathogen interaction (ko04626)	--	--	Helix-loop-helix DNA-binding domain		Transcription factor bHLH75 OS=Arabidopsis thaliana OX=3702 GN=BHLH75 PE=2 SV=1	K	Transcription	unnamed protein product [Prunus armeniaca]
PaF106G0600024829.01	76	51	95	14	26	19	1.32883	1.06661	1.70264	0.255158	0.52685	0.326512	0.000104104	-1.33392	down	--	--	Cellular Component: ubiquitin ligase complex (GO:0000151);; Molecular Function: molecular_function (GO:0003674);; Molecular Function: catalytic activity (GO:0003824);; Molecular Function: ubiquitin-protein transferase activity (GO:0004842);; Cellular Component: cellular_component (GO:0005575);; Cellular Component: intracellular (GO:0005622);; Cellular Component: cell (GO:0005623);; Cellular Compo…	--	--	--	--	Protein of unknown function (DUF295)		F-box protein SKIP23 OS=Arabidopsis thaliana OX=3702 GN=SKIP23 PE=1 SV=1	S	Function unknown	unnamed protein product [Prunus armeniaca]
PaF106G0100003482.01	358	214	302	536	786	774	4.7206	3.35853	4.16553	7.65894	11.9815	10.1479	1.18963e-12	1.28344	up	--	--	Molecular Function: monooxygenase activity (GO:0004497);; Molecular Function: iron ion binding (GO:0005506);; Molecular Function: oxidoreductase activity, acting on paired donors, with incorporation or reduction of molecular oxygen (GO:0016705);; Molecular Function: heme binding (GO:0020037);;	K15639|9.2e-91|pavi:110765572|K15639 PHYB activation tagged suppressor 1 [EC:1.14.-.-] | (RefSeq) cytochrome P450 CYP749A22-like	Brassinosteroid biosynthesis (ko00905)	[QI]	Secondary metabolites biosynthesis, transport and catabolism;; Lipid transport and metabolism	Cytochrome P450		Cytochrome P450 CYP749A22 OS=Panax ginseng OX=4054 PE=2 SV=1	--	--	cytochrome P450 CYP749A22-like [Prunus avium]
