# Supplementary material for: Mining for genes related to pistil abortion in Prunus sibirica L
Source: PeerJ. 2022 Nov 15;10:e14366. doi: 10.7717/peerj.14366 (PMC9673769; doi:10.7717/peerj.14366)
Supplement: Table S20 [file peerj-10-14366-s020.xls]

## Sheet: Sheet1
Table S20 Raw data of Ct value
Raw data of Ct value
	Target gene	Reference Gene
	Ct value	Ct value
	PaF106G0400016074.01	18SrRNA
CK1	27.7889	5.7353
CK2	28.02	5.83203
CK3	28.2511	5.78366
T1	28.9273	6.1586
T2	28.9205	6.1346
T3	28.9136	6.11061
	PaF106G0400016036.01	18SrRNA
CK1	28.3876	5.7353
CK2	28.2561	5.83203
CK3	28.1511	5.78366
T1	27.866	6.1586
T2	28.0423	6.1346
T3	27.9542	6.11061
	PaF106G0600024841.01	18SrRNA
CK1	28.6008	5.7353
CK2	28.4185	5.83203
CK3	28.1133	5.78366
T1	28.6464	6.1586
T2	28.177	6.1346
T3	28.4117	6.11061
	PaF106G0300014127.01	18SrRNA
CK1	31.152	5.7353
CK2	31.0952	5.83203
CK3	31.0385	5.78366
T1	35.1466	6.1586
T2	35.9502	6.1346
T3	35.5484	6.11061
	PaF106G0100002724.01	18SrRNA
CK1	26.1136	5.7353
CK2	26.2094	5.83203
CK3	26.0179	5.78366
T1	25.7063	6.1586
T2	25.5693	6.1346
T3	25.4324	6.11061
	PaF106G0800032694.01	18SrRNA
CK1	31.2578	5.7353
CK2	31.4294	5.83203
CK3	31.0862	5.78366
T1	32.2945	6.1586
T2	32.1911	6.1346
T3	32.0878	6.11061
	PaF106G0800032137.01	18SrRNA
CK1	24.9286	5.7353
CK2	24.2849	5.83203
CK3	25.5723	5.78366
T1	27.8938	6.1586
T2	27.907	6.1346
T3	27.9202	6.11061
	PaF106G0300011662.01	18SrRNA
CK1	27.8475	5.7353
CK2	27.924	5.83203
CK3	27.7576	5.78366
T1	26.5544	6.1586
T2	26.5778	6.1346
T3	26.6175	6.11061
	PaF106G0100001107.01	18SrRNA
CK1	23.9373	5.7353
CK2	23.9987	5.83203
CK3	23.5497	5.78366
T1	22.9388	6.1586
T2	22.7002	6.1346
T3	22.8169	6.11061
	PaF106G0500020797.01	18SrRNA
CK1	28.7879	5.7353
CK2	28.8695	5.83203
CK3	28.7064	5.78366
T1	31.4869	6.1586
T2	31.5542	6.1346
T3	31.5599	6.11061
	PaF106G0800030462.01	18SrRNA
CK1	27.9271	5.7353
CK2	27.6704	5.83203
CK3	27.5394	5.78366
T1	27.4094	6.1586
T2	27.4679	6.1346
T3	27.5264	6.11061
	PaF106G0300011965.01	18SrRNA
CK1	25.6862	5.7353
CK2	25.7002	5.83203
CK3	25.7142	5.78366
T1	27.4844	6.1586
T2	28.2119	6.1346
T3	28.9395	6.11061
	PaF106G0100001994.01	18SrRNA
CK1	25.0722	5.7353
CK2	25.4993	5.83203
CK3	25.2944	5.78366
T1	27.6892	6.1586
T2	27.938	6.1346
T3	27.4403	6.11061
	PaF106G0600024203.01	18SrRNA
CK1	27.9567	5.7353
CK2	27.8886	5.83203
CK3	27.8205	5.78366
T1	26.8617	6.1586
T2	26.999	6.1346
T3	26.9453	6.11061
	PaF106G0100006344.01	18SrRNA
CK1	25.7891	5.7353
CK2	25.9221	5.83203
CK3	25.8556	5.78366
T1	29.1623	6.1586
T2	29.2248	6.1346
T3	29.1936	6.11061
	PaF106G0200007167.01	18SrRNA
CK1	24.8037	5.7353
CK2	24.9364	5.83203
CK3	24.1891	5.78366
T1	27.6488	6.1586
T2	27.1612	6.1346
T3	27.508	6.11061
Processed data of Ct value
Gene ID	Log2FoldChange (qRT-PCR)	SD	Log2FoldChange(Transcriptome sequencing)
PaF106G0400016074.01	-0.549524	0.00687122	-3.02773
PaF106G0400016036.01	0.661756	0.0881567	3.10266
PaF106G0600024841.01	0.316763	0.234657	1.25154
PaF106G0300014127.01	-4.10224	0.401775	-3.64503
PaF106G0100002724.01	0.895258	0.136958	1.12944
PaF106G0800032694.01	-0.582404	0.103342	-2.08005
PaF106G0800032137.01	-2.62753	0.0131979	-4.65636
PaF106G0300011662.01	1.61074	0.0319207	1.1363
PaF106G0100001107.01	1.36085	0.119311	1.03197
PaF106G0500020797.01	-2.39477	0.0406329	-3.56826
PaF106G0800030462.01	0.595317	0.0585346	5.20166
PaF106G0300011965.01	-2.1608	0.727555	-2.18545
PaF106G0100001994.01	-2.0496	0.248835	-1.48085
PaF106G0600024203.01	1.30419	0.0691885	1.23803
PaF106G0100006344.01	-2.98703	0.0312223	-1.68612
PaF106G0200007167.01	-2.44534	0.250915	-4.05461
