# Supplementary material for: Mining for genes related to pistil abortion in Prunus sibirica L
Source: PeerJ. 2022 Nov 15;10:e14366. doi: 10.7717/peerj.14366 (PMC9673769; doi:10.7717/peerj.14366)
Supplement: Table S21 [file peerj-10-14366-s021.xlsx]

## Sheet: Sheet1
Table S21 Detailed information of DEGs in qRT-PCR
#ID	NPt1_Count	NPt2_Count	NPt3_Count	APt1_Count	APt2_Count	APt3_Count	NPt1_FPKM	NPt2_FPKM	NPt3_FPKM	APt1_FPKM	APt2_FPKM	APt3_FPKM	FDR	log2FC	regulated	COG_class	COG_class_annotation	GO_annotation	KEGG_annotation	KEGG_pathway_annotation	KOG_class	KOG_class_annotation	Pfam_annotation	Swiss-Prot_annotation	eggNOG_class	eggNOG_class_annotation	NR_annotation
PaF106G0400016074.01	176	106	141	8	8	10	5.16665	3.71819	4.27488	0.248192	0.261238	0.276998	1.4423e-23	-3.02773	down	--	--	Molecular Function: DNA binding (GO:0003677);; Molecular Function: transcription factor activity, sequence-specific DNA binding (GO:0003700);; Cellular Component: nucleus (GO:0005634);; Biological Process: flower development (GO:0009908);; Cellular Component: host cell nucleus (GO:0042025);; Molecular Function: metal ion binding (GO:0046872);;	K20641|4.9e-13|cvr:CHLNCDRAFT_59250|K20641 Rho GTPase-activating protein 20 | (RefSeq) hypothetical protein	--	--	--	SBP domain	Squamosa promoter-binding-like protein 5 OS=Arabidopsis thaliana OX=3702 GN=SPL5 PE=2 SV=1	K	Transcription	PREDICTED: squamosa promoter-binding-like protein 3 [Prunus mume]
PaF106G0400016036.01	0	0	0	82	58	46	0	0	0	4.04113	3.04975	2.09193	5.67728e-17	3.10266	up	--	--	Biological Process: reproduction (GO:0000003);; Biological Process: response to reactive oxygen species (GO:0000302);; Biological Process: response to acid chemical (GO:0001101);; Biological Process: developmental process involved in reproduction (GO:0003006);; Cellular Component: cellular_component (GO:0005575);; Cellular Component: extracellular region (GO:0005576);; Cellular Component: extrace…	--	--	--	--	Stigma-specific protein, Stig1	Protein GRIM REAPER OS=Arabidopsis thaliana OX=3702 GN=GRI PE=1 SV=1	S	Function unknown	unnamed protein product [Prunus armeniaca]
PaF106G0600024841.01	450	438	531	1135	988	1144	4.57845	5.32982	5.56361	12.5695	11.7248	11.6466	2.89483e-23	1.25154	up	[O]	Posttranslational modification, protein turnover, chaperones	Biological Process: reproduction (GO:0000003);; Biological Process: cell morphogenesis (GO:0000902);; Biological Process: cell morphogenesis involved in differentiation (GO:0000904);; Biological Process: developmental process involved in reproduction (GO:0003006);; Molecular Function: molecular_function (GO:0003674);; Molecular Function: catalytic activity (GO:0003824);; Cellular Component: cellu…	K03686|2.3e-16|ini:109164591|K03686 molecular chaperone DnaJ | (RefSeq) chaperone protein DnaJ	--	[O]	Posttranslational modification, protein turnover, chaperones	DnaJ domain	DnaJ protein ERDJ3A OS=Arabidopsis thaliana OX=3702 GN=ERDJ3A PE=1 SV=1	O	Posttranslational modification, protein turnover, chaperones	unnamed protein product [Prunus armeniaca]
PaF106G0300014127.01	251	194	148	4	3	12	2.2646	2.13633	1.45047	0.029972	0.019201	0.098054	2.24033e-32	-3.64503	down	--	--	Molecular Function: DNA binding (GO:0003677);; Molecular Function: transcription factor activity, sequence-specific DNA binding (GO:0003700);; Cellular Component: nucleus (GO:0005634);;	K09285|1.3e-175|pmum:103327638|K09285 AP2-like factor, ANT lineage | (RefSeq) AP2-like ethylene-responsive transcription factor AIL1	--	--	--	AP2 domain	AP2-like ethylene-responsive transcription factor AIL1 OS=Arabidopsis thaliana OX=3702 GN=AIL1 PE=2 SV=1	K	Transcription	PREDICTED: AP2-like ethylene-responsive transcription factor AIL1 [Prunus mume]
PaF106G0100002724.01	694	434	516	1031	1187	1227	8.50971	6.50167	6.55555	13.2735	16.5232	14.7397	2.86709e-16	1.12944	up	--	--	Molecular Function: DNA binding (GO:0003677);; Cellular Component: nucleus (GO:0005634);; Cellular Component: host cell nucleus (GO:0042025);; Molecular Function: metal ion binding (GO:0046872);;	K13415|2.2e-17|mdm:103413440|K13415 protein brassinosteroid insensitive 1 [EC:2.7.10.1 2.7.11.1] | (RefSeq) uncharacterized protein LOC103413440 isoform X1	Plant hormone signal transduction (ko04075)	--	--	SBP domain	Squamosa promoter-binding-like protein 13A OS=Arabidopsis thaliana OX=3702 GN=SPL13A PE=1 SV=1	K	Transcription	unnamed protein product [Prunus armeniaca]
PaF106G0800032694.01	290	313	261	20	69	53	3.3495	4.32148	3.11065	0.244121	0.930004	0.603861	3.53876e-13	-2.08005	down	--	--	Cellular Component: plasma membrane (GO:0005886);; Biological Process: auxin-activated signaling pathway (GO:0009734);; Biological Process: negative regulation of ethylene-activated signaling pathway (GO:0010105);; Biological Process: basipetal auxin transport (GO:0010540);; Cellular Component: integral component of membrane (GO:0016021);; Biological Process: root hair elongation (GO:0048767);; B…	K13947|2.7e-305|pper:18766896|K13947 auxin efflux carrier family protein | (RefSeq) auxin efflux carrier component 6	--	--	--	Membrane transport protein	Auxin efflux carrier component 6 OS=Arabidopsis thaliana OX=3702 GN=PIN6 PE=2 SV=2	P	Inorganic ion transport and metabolism	auxin efflux carrier component 6 [Prunus persica]
PaF106G0800032137.01	218	158	271	1	0	1	3.63295	3.15297	4.67626	0.009529	0	0.004775	1.09212e-46	-4.65636	down	--	--	Molecular Function: protein binding (GO:0005515);; Biological Process: biological_process (GO:0008150);; Biological Process: tissue development (GO:0009888);; Biological Process: meristem maintenance (GO:0010073);; Biological Process: multicellular organismal process (GO:0032501);; Biological Process: developmental process (GO:0032502);; Biological Process: meristem development (GO:0048507);; Bio…	--	--	[R]	General function prediction only	Leucine rich repeat	Receptor-like protein 7 OS=Arabidopsis thaliana OX=3702 GN=RLP7 PE=3 SV=2	S	Function unknown	receptor like protein 30-like [Prunus avium]
PaF106G0300011662.01	153	190	194	349	357	482	3.33028	4.91522	4.32763	8.35658	9.21466	10.7024	1.14178e-09	1.1363	up	--	--	Molecular Function: transcription regulatory region sequence-specific DNA binding (GO:0000976);; Molecular Function: RNA polymerase II regulatory region sequence-specific DNA binding (GO:0000977);; Molecular Function: RNA polymerase II transcription factor activity, sequence-specific DNA binding (GO:0000981);; Cellular Component: nucleus (GO:0005634);; Molecular Function: transcription factor bin…	K09264|2.7e-100|pavi:110759061|K09264 MADS-box transcription factor, plant | (RefSeq) truncated transcription factor CAULIFLOWER A-like	--	[K]	Transcription	K-box region	Agamous-like MADS-box protein FUL-L OS=Vitis vinifera OX=29760 GN=FULL PE=2 SV=1	K	Transcription	hypothetical protein PRUPE_3G249300 [Prunus persica]
PaF106G0100001107.01	2147	1728	1984	3822	3426	4096	28.5762	27.4667	27.2385	55.4508	53.2391	54.6357	4.89488e-41	1.03197	up	--	--	Cellular Component: nucleus (GO:0005634);; Molecular Function: zinc ion binding (GO:0008270);; Biological Process: regulation of flower development (GO:0009909);;	K12135|7.3e-11|thj:104802991|K12135 zinc finger protein CONSTANS | (RefSeq) zinc finger protein CONSTANS-LIKE 2-like	Circadian rhythm - plant (ko04712)	[K]	Transcription	B-box zinc finger	Zinc finger protein CONSTANS-LIKE 5 OS=Arabidopsis thaliana OX=3702 GN=COL5 PE=2 SV=2	K	Transcription	zinc finger protein CONSTANS-LIKE 5 [Prunus persica]
PaF106G0500020797.01	119	96	64	0	0	0	2.13913	2.06073	1.1806	0	0	0	3.0987e-23	-3.56826	down	--	--	Molecular Function: DNA binding (GO:0003677);; Cellular Component: nucleus (GO:0005634);;	K09422|7.8e-191|pmum:103338486|K09422 transcription factor MYB, plant | (RefSeq) myb-related protein Hv1-like	--	[K]	Transcription	Myb-like DNA-binding domain	Transcription factor MYB106 OS=Arabidopsis thaliana OX=3702 GN=MYB106 PE=2 SV=1	--	--	unnamed protein product [Prunus armeniaca]
PaF106G0800030462.01	0	0	0	193	326	303	0	0	0	1.3726	2.50062	1.9791	1.30777e-58	5.20166	up	--	--	Molecular Function: nucleotide binding (GO:0000166);; Biological Process: response to reactive oxygen species (GO:0000302);; Biological Process: response to acid chemical (GO:0001101);; Biological Process: immune system process (GO:0002376);; Molecular Function: molecular_function (GO:0003674);; Molecular Function: binding (GO:0005488);; Cellular Component: cellular_component (GO:0005575);; Cellu…	K16226|5.2e-16|bna:106416466|K16226 disease resistance protein RPS4 | (RefSeq) disease resistance protein RPS4-like	Plant-pathogen interaction (ko04626)	--	--	Leucine rich repeat	--	T	Signal transduction mechanisms	Hypothetical predicted protein, partial [Prunus dulcis]
PaF106G0300011965.01	3639	3002	3231	556	653	779	39.2682	38.7648	35.962	6.52909	8.21579	8.4123	9.55857e-109	-2.18545	down	[G]	Carbohydrate transport and metabolism	Biological Process: polysaccharide catabolic process (GO:0000272);; Molecular Function: beta-amylase activity (GO:0016161);; Molecular Function: amylopectin maltohydrolase activity (GO:0102229);;	K01177|1.1e-300|pper:18782689|K01177 beta-amylase [EC:3.2.1.2] | (RefSeq) beta-amylase	Starch and sucrose metabolism (ko00500)	--	--	Glycosyl hydrolase family 14	Beta-amylase OS=Trifolium repens OX=3899 GN=BMY1 PE=2 SV=1	G	Carbohydrate transport and metabolism	unnamed protein product [Prunus armeniaca]
PaF106G0100001994.01	1449	1135	1048	437	347	386	23.7266	22.2331	17.7081	7.777	6.62218	6.33337	1.4898e-25	-1.48085	down	--	--	Molecular Function: molecular_function (GO:0003674);; Molecular Function: nucleic acid binding (GO:0003676);; Molecular Function: DNA binding (GO:0003677);; Molecular Function: double-stranded DNA binding (GO:0003690);; Molecular Function: single-stranded DNA binding (GO:0003697);; Molecular Function: RNA binding (GO:0003723);; Molecular Function: binding (GO:0005488);; Cellular Component: cellul…	--	--	--	--	--	Protein EMBRYONIC FLOWER 1 OS=Arabidopsis thaliana OX=3702 GN=EMF1 PE=1 SV=1	S	Function unknown	unnamed protein product [Prunus armeniaca]
PaF106G0600024203.01	1682	1445	1645	3168	3343	4256	12.0119	12.3431	12.1149	24.62	27.866	30.4266	6.89569e-46	1.23803	up	--	--	Biological Process: reproduction (GO:0000003);; Biological Process: developmental process involved in reproduction (GO:0003006);; Molecular Function: protein binding (GO:0005515);; Cellular Component: cellular_component (GO:0005575);; Cellular Component: cell (GO:0005623);; Biological Process: multicellular organism development (GO:0007275);; Biological Process: biological_process (GO:0008150);; …	--	--	--	--	NPH3 family	BTB/POZ domain-containing protein NPY2 OS=Arabidopsis thaliana OX=3702 GN=NPY2 PE=2 SV=1	S	Function unknown	unnamed protein product [Prunus armeniaca]
PaF106G0100006344.01	620	726	400	31	5	55	12.769	19.0461	8.88504	0.64056	0.08712	1.05616	1.47611e-05	-1.68612	down	--	--	Molecular Function: transcription regulatory region sequence-specific DNA binding (GO:0000976);; Molecular Function: RNA polymerase II regulatory region sequence-specific DNA binding (GO:0000977);; Molecular Function: RNA polymerase II transcription factor activity, sequence-specific DNA binding (GO:0000981);; Cellular Component: nucleus (GO:0005634);; Molecular Function: transcription factor bin…	K09264|1.1e-57|pavi:110771220|K09264 MADS-box transcription factor, plant | (RefSeq) agamous-like MADS-box protein AGL11 isoform X1	--	[K]	Transcription	K-box region	Agamous-like MADS-box protein AGL11 OS=Vitis vinifera OX=29760 GN=AGL11 PE=2 SV=1	K	Transcription	agamous-like MADS-box protein AGL11 isoform X1 [Prunus persica]
PaF106G0200007167.01	154	105	107	0	0	0	14.6036	11.8353	10.4255	0	0	0	1.14275e-31	-4.05461	down	--	--	Molecular Function: DNA binding (GO:0003677);; Cellular Component: nucleus (GO:0005634);; Biological Process: regulation of transcription, DNA-templated (GO:0006355);; Biological Process: response to hormone (GO:0009725);;	K14486|5.3e-06|bdi:100824752|K14486 auxin response factor | (RefSeq) auxin response factor 11 isoform X1	Plant hormone signal transduction (ko04075)	--	--	Auxin response factor	Auxin response factor 22 OS=Oryza sativa subsp. japonica OX=39947 GN=ARF22 PE=2 SV=1	K	Transcription	PREDICTED: auxin response factor [Prunus dulcis]
